# Supplementary material for: The Establishment of Hypertrophic Cardiomyopathy Diagnosis Model via Artificial Neural Network and Random Decision Forest Method
Source: Hindawi journal article supplement (doi:10.1155/2022/2024974), 2022-09-15
Supplement: f1 [file 2024974.f1.pdf]

## DEG.infomation

|           | List of differentially expressed genes |             |             |
|-----------|----------------------------------------|-------------|-------------|
|           | logFC                                  | AveExpr     | P.Value     |
| TUBA3E    | -2.17304548                            | 8.363578315 | 5.20338E-47 |
| CEBPD     | -2.308038963                           | 9.424201214 | 8.39688E-46 |
| TUBA3C    | -2.037360093                           | 7.246174711 | 1.4436E-45  |
| ZFP36     | -2.239531917                           | 9.024541888 | 3.0698E-45  |
| RASD1     | -3.514337543                           | 7.99396139  | 4.02417E-45 |
| TUBA3D    | -2.204856437                           | 9.813431346 | 4.17833E-44 |
| CDC42EP4  | -1.213302811                           | 10.06790815 | 2.50981E-43 |
| SERPINA3  | -3.561409692                           | 8.55788027  | 5.87007E-42 |
| AXUD1     | -2.104494512                           | 8.411439364 | 5.87929E-41 |
| S100A9    | -2.914536944                           | 7.743202495 | 3.38416E-40 |
| MYH6      | -1.914546911                           | 12.77222076 | 3.98515E-40 |
| FCN3      | -2.038046435                           | 8.212979154 | 7.67333E-40 |
| MT1M      | -2.224301096                           | 7.028446005 | 1.62439E-39 |
| LYVE1     | -1.873189921                           | 7.416424672 | 3.99476E-39 |
| MAP3K6    | -1.155977199                           | 9.207012969 | 5.36836E-39 |
| PRKCD     | -0.72957472                            | 7.201549463 | 4.84733E-38 |
| CD163     | -2.136505796                           | 7.465009139 | 1.57654E-37 |
| YPEL2     | 1.072454464                            | 8.805297951 | 3.99272E-37 |
| S1PR3     | -1.008836077                           | 7.691426132 | 4.8107E-37  |
| C1R       | -1.182223545                           | 6.970479508 | 5.6455E-37  |
| FPR1      | -1.370626969                           | 6.506236067 | 6.12488E-36 |
| FCER1G    | -1.495600746                           | 7.576523546 | 1.97707E-35 |
| FKBP5     | -1.933816352                           | 8.65775758  | 4.91261E-35 |
| PIK3IP1   | 1.355199621                            | 8.980673974 | 6.51063E-35 |
| AP3M2     | 0.830505016                            | 8.991696339 | 8.88162E-35 |
| MYC       | -1.510731995                           | 7.368986977 | 9.46979E-35 |
| MT1X      | -2.371958845                           | 9.910865144 | 1.7682E-34  |
| S100A8    | -2.648366209                           | 7.920906097 | 2.21018E-34 |
| MAFB      | -1.338778522                           | 8.025339956 | 6.88789E-34 |
| CMTM7     | -0.725549695                           | 7.412721572 | 1.08283E-33 |
| SLA       | -0.877378017                           | 6.421984927 | 1.57998E-33 |
| JAK2      | 1.210077892                            | 8.484025396 | 1.63052E-33 |
| SCN2B     | 1.286297808                            | 8.349879992 | 2.23165E-33 |
| FES       | -0.771121807                           | 7.381166846 | 2.72645E-33 |
| DYRK1B    | 0.602407455                            | 6.888180985 | 3.61924E-33 |
| ZDHHC9    | -1.006841473                           | 7.540044801 | 8.49788E-33 |
| GALK1     | -0.744362326                           | 8.947532995 | 8.62259E-33 |
| PROS1     | 1.472143696                            | 11.42441666 | 9.14043E-33 |
| CHN1      | 0.643360271                            | 7.924035647 | 9.54348E-33 |
| NFKBIZ    | -0.920983962                           | 7.583803482 | 1.05989E-32 |
| C7ORF41   | 1.305974386                            | 10.41049993 | 1.10903E-32 |
| TIPARP    | -1.302047694                           | 8.875520985 | 1.40521E-32 |
| SLCO4A1   | -1.001282684                           | 6.802616432 | 1.90852E-32 |
| LOC653888 | -1.207531946                           | 7.399348544 | 2.4529E-32  |
| CORO1A    | -0.791800135                           | 6.693470252 | 3.27835E-32 |
| ALOX5     | -0.898132552                           | 6.986170737 | 5.95125E-32 |
| CTSC      | -1.248884441                           | 6.80407804  | 9.48529E-32 |
| SORBS2    | 0.826650963                            | 11.54301883 | 9.58156E-32 |
| CD97      | -0.794429808                           | 8.295105548 | 1.24872E-31 |

## DEG.infomation

|           |              |             |             |
|-----------|--------------|-------------|-------------|
| XLKD1     | -1.160006048 | 6.745885563 | 1.32389E-31 |
| STAT3     | -1.118871766 | 9.195537113 | 4.51318E-31 |
| SEC14L1   | -0.524071749 | 7.205474165 | 6.18392E-31 |
| MT1A      | -1.549496452 | 10.84912039 | 7.32315E-31 |
| PIM1      | -1.363769495 | 7.407739261 | 7.91323E-31 |
| ARPC1B    | -0.965696735 | 6.950221746 | 1.30937E-30 |
| IFITM2    | -1.208189748 | 11.83859754 | 1.95083E-30 |
| HCK       | -0.637205809 | 6.639667803 | 2.02825E-30 |
| EBI2      | -0.586869459 | 6.386732572 | 2.26629E-30 |
| WAS       | -0.93873277  | 7.182494252 | 2.59955E-30 |
| ITGB2     | -1.413178278 | 8.807851365 | 3.44755E-30 |
| SMOC2     | 1.487051563  | 9.433749692 | 3.96851E-30 |
| F13A1     | -1.578700179 | 7.405951536 | 5.17769E-30 |
| CD248     | -0.983489191 | 8.208457754 | 5.46332E-30 |
| RANGAP1   | -0.941230803 | 8.828720144 | 5.82774E-30 |
| LCP1      | -1.410086347 | 8.333819562 | 7.22172E-30 |
| IFITM3    | -1.186065314 | 11.67757043 | 7.44107E-30 |
| SMYD2     | 0.860853624  | 10.36040251 | 9.93609E-30 |
| HCLS1     | -1.116174517 | 8.265719717 | 1.12376E-29 |
| SLCO2B1   | -0.911506246 | 8.130770898 | 1.37913E-29 |
| IL18R1    | -0.790626412 | 6.568124843 | 1.37933E-29 |
| BTG2      | -1.520996291 | 8.574959065 | 1.67594E-29 |
| CHRD12    | -1.171336546 | 6.374890146 | 2.00064E-29 |
| MGST1     | -0.680607023 | 6.40046017  | 2.35837E-29 |
| C10ORF71  | 0.853147399  | 7.263092124 | 3.51359E-29 |
| IRX6      | 1.384343762  | 8.771585266 | 3.89684E-29 |
| INPP1     | -0.695696565 | 8.759646446 | 4.59567E-29 |
| IL13RA1   | -0.833352749 | 8.959267621 | 5.40967E-29 |
| MGC42367  | -1.024647194 | 7.761970783 | 5.60507E-29 |
| SAP18     | 0.634844476  | 8.834469954 | 5.67646E-29 |
| CHST7     | -1.071284973 | 8.898629868 | 6.24156E-29 |
| MFSD10    | -0.662730927 | 9.599808274 | 7.27124E-29 |
| BCL6      | -0.932343623 | 8.796081776 | 8.91972E-29 |
| LMOD2     | 1.284989823  | 9.4494294   | 1.90957E-28 |
| NFKBIA    | -1.072534097 | 10.53437933 | 1.9649E-28  |
| TUBB2C    | -0.961446534 | 10.4743106  | 2.91559E-28 |
| LOC653879 | -1.133854342 | 7.076305456 | 3.10481E-28 |
| MNS1      | 0.471203766  | 6.849638238 | 4.17063E-28 |
| C1QC      | -1.330656624 | 8.210266395 | 4.24884E-28 |
| SLC15A3   | -0.894326938 | 8.294544527 | 4.36807E-28 |
| MT2A      | -1.746983526 | 10.47381887 | 4.66428E-28 |
| NNMT      | -0.907491226 | 7.974207221 | 4.92524E-28 |
| CYBA      | -0.983796872 | 9.136413151 | 5.10426E-28 |
| C1ORF162  | -1.042522118 | 8.283033764 | 6.5787E-28  |
| C1QB      | -1.468626129 | 8.319736068 | 6.6257E-28  |
| RHBDF2    | -0.58288311  | 6.988903593 | 6.72398E-28 |
| DOCK2     | -0.869684446 | 7.221842642 | 6.86734E-28 |
| LAPTM5    | -1.130703788 | 7.385334012 | 6.89481E-28 |
| ZNF415    | 0.589720867  | 8.423383405 | 7.02878E-28 |
| ZGPAT     | -0.417441877 | 7.157060395 | 8.74824E-28 |
| HEG1      | 0.674588054  | 9.036105752 | 9.49413E-28 |

## DEG.infomation

|           |              |             |             |
|-----------|--------------|-------------|-------------|
| LRRC8A    | -0.961047305 | 7.618568549 | 9.87789E-28 |
| CEBPB     | -1.012413536 | 11.24876265 | 1.02412E-27 |
| CD14      | -1.393619597 | 9.923432956 | 1.31884E-27 |
| C5ORF4    | 0.567046604  | 6.955149441 | 1.54607E-27 |
| FGD2      | -0.705767428 | 6.739171033 | 1.61004E-27 |
| CD68      | -0.938087946 | 8.50494957  | 1.70772E-27 |
| MBP       | 0.962895477  | 8.87691728  | 2.1029E-27  |
| ZNF627    | 0.470003847  | 7.844395869 | 2.1911E-27  |
| S100A10   | -1.035596719 | 11.42912271 | 2.30731E-27 |
| MASP1     | 0.825194106  | 9.912881394 | 2.34796E-27 |
| TKT       | -1.039250448 | 7.909001107 | 2.50017E-27 |
| VAMP8     | -0.932000332 | 8.669879639 | 2.5604E-27  |
| TSPYL2    | -0.687601527 | 7.035684514 | 2.68272E-27 |
| TDRD9     | -0.72255815  | 6.723318543 | 2.95006E-27 |
| SRGN      | -1.206380635 | 8.949063704 | 3.09603E-27 |
| ALOX5AP   | -1.385100966 | 8.200514581 | 3.30815E-27 |
| FRZB      | 1.399855478  | 8.986840756 | 3.3142E-27  |
| IVNS1ABP  | 0.783412027  | 8.824739812 | 3.59153E-27 |
| LILRA5    | -0.770152322 | 6.376438545 | 3.74536E-27 |
| C14ORF132 | 1.303669979  | 7.776039798 | 4.30289E-27 |
| FAM110B   | 0.768827203  | 8.683677421 | 4.39978E-27 |
| SLC12A9   | -0.60054858  | 7.820734667 | 4.588E-27   |
| HAVCR2    | -1.051982114 | 7.765469828 | 4.90016E-27 |
| MTCH1     | -0.505081482 | 12.0517783  | 5.06177E-27 |
| GPR56     | -0.884996235 | 8.183013453 | 5.18907E-27 |
| CCND2     | 0.697046073  | 12.37862069 | 5.99107E-27 |
| ARHGAP4   | -0.555250377 | 7.152700881 | 7.43232E-27 |
| CAPN1     | -0.63387474  | 9.6856311   | 7.87998E-27 |
| MVP       | -0.809736216 | 7.869034202 | 8.25956E-27 |
| LYPLAL1   | 0.803544412  | 9.815284858 | 9.16409E-27 |
| OSR1      | -1.053812231 | 6.965551149 | 9.68795E-27 |
| CD209     | -0.989748877 | 6.857377991 | 1.1776E-26  |
| SYF2      | 0.499227447  | 9.405887961 | 1.24378E-26 |
| CYP2J2    | 0.924832746  | 12.34107539 | 1.36096E-26 |
| IFI30     | -0.797417176 | 6.514332373 | 1.44544E-26 |
| ACE2      | 1.82110406   | 9.10628885  | 1.8575E-26  |
| SORBS1    | 0.786983887  | 10.04951485 | 1.93456E-26 |
| DDIT3     | 0.697526189  | 8.101093941 | 1.9389E-26  |
| LILRB5    | -0.555867219 | 6.622068527 | 1.96233E-26 |
| ATPIF1    | 0.790723056  | 10.46682943 | 2.03038E-26 |
| PRICKLE1  | 1.034180661  | 9.627772368 | 2.10037E-26 |
| HES6      | -0.7542047   | 7.001334758 | 2.1183E-26  |
| SEMA4B    | -0.677630682 | 7.244327872 | 2.40908E-26 |
| RASSF1    | -0.542187956 | 6.825196403 | 2.59222E-26 |
| M6PRBP1   | -1.130238422 | 9.645433947 | 2.62608E-26 |
| C8ORF47   | 0.607278657  | 6.839954068 | 2.9408E-26  |
| NKD2      | -0.805368887 | 6.946162309 | 3.09309E-26 |
| GPR172A   | -0.757787242 | 7.572592125 | 3.10746E-26 |
| KIAA1853  | 0.781712947  | 6.910965551 | 3.13663E-26 |
| OSMR      | -0.620299918 | 6.259879896 | 3.41836E-26 |
| PUS1      | -0.577005826 | 7.262991181 | 3.80964E-26 |

## DEG.infomation

|           |              |             |             |
|-----------|--------------|-------------|-------------|
| ZNF187    | 0.350627277  | 7.204474357 | 6.45774E-26 |
| TCEAL8    | 0.455277927  | 9.386098843 | 6.64019E-26 |
| TUBB      | -0.831171496 | 9.593267409 | 6.64997E-26 |
| INTU      | 0.468743219  | 7.000295224 | 1.06842E-25 |
| GNA15     | -0.647094662 | 6.530537041 | 1.07714E-25 |
| ANKMY2    | 0.730871513  | 9.406718349 | 1.08035E-25 |
| SELS      | -0.730888293 | 9.873210322 | 1.17429E-25 |
| SDSL      | 0.777364068  | 8.616526934 | 1.18556E-25 |
| UCHL5IP   | -0.409211141 | 7.839014021 | 1.20945E-25 |
| GATA2     | -0.490551869 | 6.585213111 | 1.49355E-25 |
| HMG2      | 0.595019783  | 9.43373208  | 1.52523E-25 |
| VPS41     | 0.412825558  | 8.667257542 | 1.61413E-25 |
| C5ORF23   | 1.236415014  | 8.704239079 | 1.82608E-25 |
| GRASP     | -0.614334688 | 6.772534552 | 2.06756E-25 |
| YPEL1     | 0.606775759  | 7.580901137 | 2.09399E-25 |
| CNDP2     | -0.507135997 | 10.62173537 | 2.16028E-25 |
| LOC148915 | 0.6963943    | 10.12284792 | 2.56086E-25 |
| SVIL      | 0.605639124  | 10.7703781  | 2.76954E-25 |
| MAP3K8    | -0.670904136 | 6.817151127 | 3.39781E-25 |
| MIDN      | -0.969821259 | 8.803575999 | 4.37374E-25 |
| SGK       | -1.371773743 | 9.133653258 | 5.01284E-25 |
| RASL11B   | 1.724164568  | 10.08212131 | 6.56625E-25 |
| IRX2      | 1.003778858  | 7.290923729 | 6.79066E-25 |
| PDE5A     | 0.765944838  | 7.586638624 | 1.16141E-24 |
| MPP3      | -0.813163841 | 7.349614494 | 1.23934E-24 |
| C20ORF27  | -0.479489405 | 7.522275042 | 1.34227E-24 |
| TUBA1B    | -0.697747869 | 13.1190396  | 1.3518E-24  |
| PLCE1     | 1.027332419  | 7.895222524 | 1.57553E-24 |
| CSNK1D    | -0.554541951 | 7.768791334 | 1.7702E-24  |
| IMPDH1    | -0.487130218 | 7.218401159 | 1.82265E-24 |
| VSIG4     | -0.897448968 | 6.932149756 | 2.01319E-24 |
| FCGR2A    | -0.677676775 | 7.018134223 | 2.38012E-24 |
| GFPT2     | -0.941566814 | 6.843550946 | 2.40653E-24 |
| KIAA0141  | 0.611702749  | 9.130519678 | 2.47449E-24 |
| DCUN1D3   | -0.6332991   | 7.721418571 | 2.50343E-24 |
| DDIT4     | -1.316253099 | 9.361341096 | 2.5407E-24  |
| LOC255783 | -0.65466918  | 9.395411481 | 2.61304E-24 |
| LRRC49    | 1.059504238  | 11.22239707 | 2.65557E-24 |
| SLC16A9   | 0.903819037  | 7.231852171 | 2.80649E-24 |
| EGLN2     | -0.400906152 | 9.18625526  | 2.88126E-24 |
| PPARG     | -0.462090459 | 7.06948157  | 3.26832E-24 |
| PLEK      | -0.781365718 | 7.08194882  | 3.55709E-24 |
| DUSP1     | -1.544017941 | 10.35509095 | 3.87523E-24 |
| IRAK3     | -0.657308689 | 6.711133782 | 4.0471E-24  |
| ADAP2     | -0.808101872 | 7.719722425 | 4.1326E-24  |
| SLC39A1   | -0.665371687 | 8.810862213 | 4.13613E-24 |
| FGR       | -0.738872676 | 6.706411419 | 4.25316E-24 |
| PLTP      | -1.036818148 | 8.13160404  | 4.30236E-24 |
| TERF1     | 0.422646876  | 6.764317126 | 4.34264E-24 |
| MARCO     | -0.830394715 | 6.445852003 | 4.46545E-24 |
| FERMT3    | -0.478398667 | 6.720215332 | 4.75304E-24 |

## DEG.infomation

|           |              |             |             |
|-----------|--------------|-------------|-------------|
| SLC25A28  | -0.557681881 | 9.769833397 | 6.02186E-24 |
| C1QTNF1   | -1.297475834 | 8.458476318 | 6.56044E-24 |
| TRMT5     | 0.655602959  | 9.630876333 | 6.70847E-24 |
| ARS2      | -0.42929386  | 9.093393383 | 7.09412E-24 |
| SLC7A1    | -1.113469682 | 8.02702406  | 1.14379E-23 |
| CCDC28A   | 0.608692733  | 8.756387956 | 1.27098E-23 |
| RARRES1   | -1.352698156 | 6.661289737 | 1.30649E-23 |
| LOC730534 | 0.65265905   | 10.80886652 | 1.34476E-23 |
| SERPINA5  | -0.835768842 | 6.818580725 | 1.42139E-23 |
| SFRP1     | 1.730116233  | 9.941031749 | 1.51578E-23 |
| C21ORF34  | 0.678687241  | 8.733035219 | 1.56186E-23 |
| TOMM40    | -0.639266186 | 10.24689436 | 1.65996E-23 |
| SLC47A1   | 0.662445153  | 7.558569044 | 1.71342E-23 |
| SMAP2     | -0.62261482  | 8.358573974 | 1.73265E-23 |
| BCL3      | -0.677738028 | 7.039637327 | 1.76766E-23 |
| LTBR      | -0.865396197 | 7.455398929 | 1.99214E-23 |
| DUSP23    | -0.675250141 | 9.424201164 | 2.26281E-23 |
| TYROBP    | -1.139684762 | 8.503822961 | 2.36623E-23 |
| CRYM      | 0.99151093   | 8.814403132 | 2.38282E-23 |
| HOPX      | -1.508235272 | 7.061728991 | 2.71605E-23 |
| DUSP26    | 0.718799999  | 10.56587005 | 2.97481E-23 |
| BATF3     | -0.568633925 | 6.474354993 | 3.03255E-23 |
| PLAUR     | -0.573948498 | 6.352908115 | 3.16456E-23 |
| PDIA3P    | -1.051998892 | 7.025640968 | 3.23774E-23 |
| RGS4      | 1.21952652   | 7.669459237 | 3.27798E-23 |
| MS4A7     | -0.766349345 | 7.132862818 | 3.33643E-23 |
| LOC644128 | 0.527163514  | 7.783389157 | 4.02371E-23 |
| CCND1     | 0.813543156  | 11.98855885 | 4.04219E-23 |
| ICK       | 0.453458229  | 6.950397801 | 4.33714E-23 |
| TUBA1C    | -0.978286622 | 11.16644877 | 4.87253E-23 |
| ITGAM     | -0.567811378 | 6.700383363 | 5.07241E-23 |
| SNRPB     | -0.710146623 | 9.277489694 | 5.38898E-23 |
| DDOST     | -0.860626208 | 9.226315635 | 5.69594E-23 |
| EDNRA     | 0.911514912  | 8.69934266  | 5.7462E-23  |
| TJP1      | 0.500510896  | 9.7612249   | 6.25064E-23 |
| COL21A1   | 1.067366116  | 7.803279422 | 6.71988E-23 |
| CAPRIN1   | 0.422628976  | 8.625869056 | 6.75603E-23 |
| ECGF1     | -1.276095936 | 8.222504989 | 6.9422E-23  |
| ERRFI1    | -0.773853627 | 8.03749842  | 7.51748E-23 |
| METTL7B   | -1.35576942  | 6.805915976 | 7.62163E-23 |
| PLEKHF1   | -1.143556811 | 8.468329286 | 7.89458E-23 |
| PHLDB2    | 0.763003593  | 8.802285407 | 8.87815E-23 |
| SH3BGRL3  | -1.09046293  | 8.30054016  | 9.29193E-23 |
| C19ORF10  | -1.24273035  | 7.30400264  | 1.0127E-22  |
| GLA       | -0.510625611 | 7.908476819 | 1.05813E-22 |
| MS4A6A    | -1.013317788 | 7.849406978 | 1.10153E-22 |
| FLJ20021  | 0.425359297  | 7.460420277 | 1.37285E-22 |
| HRASLS    | 0.549011572  | 8.025682833 | 1.47357E-22 |
| CDC42EP2  | -0.574235357 | 7.35718097  | 1.51128E-22 |
| NCF4      | -0.324602641 | 6.413000851 | 1.57519E-22 |
| EIF4G1    | -0.521447319 | 8.953610857 | 1.62159E-22 |

## DEG.infomation

|           |              |             |             |
|-----------|--------------|-------------|-------------|
| SLC11A1   | -0.575441244 | 6.211710152 | 1.76631E-22 |
| FRMD5     | 0.843333192  | 8.446543812 | 1.77091E-22 |
| OMA1      | 0.558718317  | 7.980936635 | 1.7964E-22  |
| LOC642031 | -0.690506969 | 8.106709744 | 1.85129E-22 |
| EPB41L5   | 0.422791249  | 7.259535226 | 1.89049E-22 |
| DHX37     | -0.611440582 | 7.170513524 | 2.11276E-22 |
| VPS45     | 0.483354557  | 9.367984565 | 2.40536E-22 |
| KLF6      | -0.848226833 | 8.906031643 | 2.78619E-22 |
| SLC2A1    | -0.769695298 | 8.451792362 | 2.80818E-22 |
| SEC61A1   | -0.676211895 | 10.2087779  | 2.95695E-22 |
| ZNF20     | 0.310118111  | 7.070929037 | 3.01E-22    |
| HLTF      | 0.504277155  | 8.030296238 | 3.15714E-22 |
| SLC39A3   | -0.394130384 | 7.8909051   | 3.43742E-22 |
| ENO1      | -0.822814533 | 11.09503374 | 3.5503E-22  |
| LOC201140 | -1.453454217 | 6.851446313 | 3.58562E-22 |
| KYNU      | -0.412633364 | 6.318266231 | 3.70785E-22 |
| ATP1A2    | 1.273976716  | 9.949108075 | 3.71877E-22 |
| EML3      | -0.611712377 | 8.723004204 | 5.19827E-22 |
| LOC158376 | -0.534273135 | 6.873467382 | 5.62033E-22 |
| ATP6V1G2  | 0.29518451   | 6.709886098 | 6.0306E-22  |
| TEAD4     | -0.855167766 | 6.898112366 | 6.3615E-22  |
| KLHDC9    | 0.7688161    | 7.583966995 | 6.47125E-22 |
| FBXO38    | 0.377698531  | 8.222887882 | 6.50498E-22 |
| TBXAS1    | -0.621545819 | 6.74652871  | 6.50741E-22 |
| TMEM189   | -0.465957171 | 7.471676425 | 6.79914E-22 |
| SLC1A5    | -0.518203108 | 6.567261318 | 6.87646E-22 |
| GATM      | 1.185078875  | 8.251836408 | 7.0639E-22  |
| TNFRSF1A  | -0.751442563 | 8.720666438 | 7.5033E-22  |
| SERPINH1  | -1.154716849 | 7.854073361 | 7.60761E-22 |
| ELL2      | -1.127652352 | 7.287942019 | 7.6512E-22  |
| ARPC3     | -1.406895783 | 8.51904283  | 7.98037E-22 |
| LOC387763 | -1.062458753 | 8.120588864 | 9.05744E-22 |
| COL6A2    | -0.712040902 | 7.903847781 | 1.02854E-21 |
| HYAL2     | -0.59336157  | 7.293705121 | 1.03055E-21 |
| ATP1A1    | -0.912096987 | 10.12442544 | 1.06391E-21 |
| ORC3L     | 0.41017041   | 8.347241188 | 1.2271E-21  |
| GSDMD     | -0.615561818 | 8.154640072 | 1.24369E-21 |
| RASSF9    | 0.450344215  | 6.649434783 | 1.29625E-21 |
| CRBN      | 0.526727571  | 9.443684586 | 1.3156E-21  |
| LCN6      | -0.909306775 | 6.678009936 | 1.34967E-21 |
| CD53      | -0.351805196 | 6.308850369 | 1.74858E-21 |
| ACVR1B    | -0.313831008 | 6.971566612 | 1.7626E-21  |
| ZNF787    | -0.617415712 | 9.420159528 | 1.89348E-21 |
| ZYX       | -0.81995149  | 8.923872746 | 2.27014E-21 |
| HM13      | -0.308063696 | 6.461046431 | 2.33577E-21 |
| RGS19     | -0.489530588 | 6.935296121 | 2.5536E-21  |
| C3        | -0.418116475 | 6.291601613 | 2.76799E-21 |
| RDH10     | -0.615993113 | 7.375351294 | 2.80134E-21 |
| KLHL12    | 0.38806161   | 8.761153863 | 2.82563E-21 |
| C5ORF41   | 0.601776628  | 8.470670069 | 2.95917E-21 |
| FZD2      | 0.802476968  | 7.63476304  | 3.12571E-21 |

## DEG.infomation

|           |              |             |             |
|-----------|--------------|-------------|-------------|
| LOC729843 | 0.550550094  | 9.149389645 | 3.17002E-21 |
| PARVG     | -0.474134534 | 6.617227832 | 3.36154E-21 |
| FKBP2     | -0.683030888 | 7.223201095 | 3.37089E-21 |
| CYBB      | -0.769901601 | 7.044877476 | 3.40161E-21 |
| ENDOGL1   | -0.856565406 | 7.961245865 | 3.56633E-21 |
| SLC37A4   | -0.443518287 | 8.144205366 | 3.70548E-21 |
| PTPN11    | 0.598306059  | 10.97223735 | 3.80219E-21 |
| DIO2      | 0.90243037   | 8.014166304 | 3.90478E-21 |
| ARHGAP24  | 0.553052263  | 7.468563248 | 4.12954E-21 |
| NDUFA4L2  | -0.670362421 | 8.807442229 | 4.23338E-21 |
| ASPSCR1   | -0.382109877 | 8.430638528 | 4.32362E-21 |
| PGD       | -0.47171617  | 8.396056419 | 4.47772E-21 |
| ATP6V0C   | -0.41069345  | 10.43362802 | 4.63846E-21 |
| BEST1     | -0.366440287 | 6.44944861  | 4.67153E-21 |
| C19ORF51  | 0.483682897  | 6.779097886 | 4.68064E-21 |
| MERTK     | -0.503129201 | 7.395599607 | 5.22565E-21 |
| GPR4      | -0.82936927  | 7.07733018  | 5.39443E-21 |
| PAFAH2    | 0.515053104  | 7.373984582 | 5.49067E-21 |
| TMBIM1    | -0.672390575 | 8.473453436 | 5.6334E-21  |
| GRM1      | 0.808947767  | 7.130029822 | 6.0619E-21  |
| CTSB      | -0.574660103 | 10.60391429 | 6.19447E-21 |
| SYNPO2L   | 0.897387194  | 13.05911338 | 6.49748E-21 |
| TGFBR2    | -0.536906266 | 9.996725322 | 7.11221E-21 |
| CHSY1     | -0.63798806  | 9.012796117 | 7.58323E-21 |
| NLGN2     | -0.476608762 | 6.943758959 | 7.5974E-21  |
| HEPH      | 0.606329638  | 7.207210737 | 7.7503E-21  |
| TNKS1BP1  | -0.471061244 | 6.959802032 | 7.96971E-21 |
| AGXT2L1   | -1.169369052 | 6.85345771  | 8.02408E-21 |
| ALG3      | -0.44290921  | 7.147132736 | 8.11736E-21 |
| LRRC1     | 0.383949591  | 6.828831661 | 8.22619E-21 |
| NUP62CL   | 0.632593907  | 6.983759505 | 8.96446E-21 |
| HTRA1     | 0.851145274  | 10.19139514 | 9.87036E-21 |
| RBPMS2    | -0.525136791 | 13.09125169 | 1.01207E-20 |
| TRABD     | -0.437807179 | 9.644511181 | 1.07486E-20 |
| DCLK1     | -0.424506487 | 6.888276979 | 1.15401E-20 |
| MKNK2     | -0.572107705 | 9.836604907 | 1.21332E-20 |
| FKBP11    | -0.853579611 | 7.395827334 | 1.25478E-20 |
| COL16A1   | 0.835536729  | 8.355090188 | 1.28794E-20 |
| NAP1L3    | 0.784069995  | 7.26780656  | 1.33693E-20 |
| RAB28     | 0.517709434  | 8.086156915 | 1.37253E-20 |
| KIAA1191  | 0.415095093  | 9.988376367 | 1.46795E-20 |
| DARC      | -1.013155528 | 7.48208902  | 1.54241E-20 |
| MME       | 0.393519291  | 6.492026448 | 1.69623E-20 |
| MAPK13    | -0.426610369 | 6.318561984 | 1.73775E-20 |
| C21ORF51  | 0.472721969  | 7.961192053 | 1.81942E-20 |
| TMBIM6    | -0.471042151 | 11.10156415 | 1.82273E-20 |
| NBPF20    | -1.056817388 | 7.740492235 | 1.93203E-20 |
| HSPA1L    | 0.35950397   | 6.992076084 | 2.05841E-20 |
| HPCAL1    | -0.469564631 | 8.516727287 | 2.09858E-20 |
| DNAJC21   | 0.285935387  | 6.995152833 | 2.21598E-20 |
| JAG2      | -0.468630094 | 7.497928386 | 2.4245E-20  |

## DEG.infomation

|           |              |             |             |
|-----------|--------------|-------------|-------------|
| NPL       | -0.456041541 | 6.371082422 | 2.47425E-20 |
| TSPYL3    | 0.339437702  | 6.796494315 | 2.50381E-20 |
| ALS2CR13  | 0.503554667  | 7.853384791 | 2.5272E-20  |
| HMGB2     | 0.695734754  | 8.69464473  | 2.95492E-20 |
| LUM       | 1.129268262  | 10.27276589 | 2.96715E-20 |
| ATL3      | -0.528647006 | 6.878970303 | 3.05186E-20 |
| PLA2G2A   | -1.35136974  | 6.710933342 | 3.09579E-20 |
| VWC2      | 0.968802057  | 9.198583298 | 3.22068E-20 |
| RRBP1     | -0.586759348 | 8.251882154 | 3.56717E-20 |
| S100A13   | 0.625445662  | 8.777518315 | 3.82502E-20 |
| HFE2      | 1.285898159  | 9.376935388 | 3.84222E-20 |
| RPN1      | -0.568667488 | 10.46584417 | 4.00181E-20 |
| HGS       | -0.634571583 | 9.548890024 | 4.18951E-20 |
| ECM2      | 0.805650453  | 7.96410746  | 4.47529E-20 |
| NIPA2     | -0.4617481   | 8.188534972 | 4.47713E-20 |
| EXTL1     | 0.71385808   | 7.373856125 | 4.55234E-20 |
| FAM125A   | -0.44749581  | 8.310473379 | 4.71457E-20 |
| CBX7      | 0.720065928  | 9.567321263 | 4.78488E-20 |
| SLC35F1   | 0.990000349  | 8.449775371 | 5.0886E-20  |
| C14ORF179 | 0.665759857  | 9.239369231 | 5.25679E-20 |
| BATF      | -0.368947113 | 6.225517124 | 5.42589E-20 |
| C5ORF46   | 0.936961438  | 7.971629226 | 5.71992E-20 |
| KIAA0644  | 0.815768774  | 7.93214698  | 6.19474E-20 |
| ENTPD6    | -0.543435689 | 8.163743057 | 6.66753E-20 |
| SNAI2     | -0.581893743 | 7.159209233 | 6.76598E-20 |
| OKL38     | -0.922587577 | 7.658780676 | 7.02385E-20 |
| APCDD1L   | 0.884280701  | 7.346388572 | 7.50876E-20 |
| MEIS1     | -0.500625315 | 7.77559716  | 7.59016E-20 |
| UNC84B    | -0.513784522 | 11.43293856 | 7.69141E-20 |
| RNF149    | -0.478521363 | 8.200219209 | 7.80583E-20 |
| ZNF211    | 0.382506613  | 7.876082553 | 7.82509E-20 |
| C1ORF142  | 0.67373745   | 7.857619468 | 8.61214E-20 |
| HCST      | -0.70634771  | 7.605437516 | 8.69581E-20 |
| C2ORF64   | 0.630970646  | 9.223774295 | 8.93737E-20 |
| LOC728473 | 0.778204057  | 9.864266715 | 9.25339E-20 |
| DYNC2L11  | 0.315328247  | 6.746771296 | 9.41405E-20 |
| LOC731486 | -0.349777007 | 6.377395909 | 1.06061E-19 |
| FBP1      | -0.546154439 | 6.325396466 | 1.10431E-19 |
| RGMA      | -0.768341897 | 8.770499366 | 1.14539E-19 |
| N6AMT1    | 0.396731035  | 7.219870403 | 1.14935E-19 |
| C19ORF59  | -0.665850084 | 6.126910453 | 1.22757E-19 |
| BTBD14A   | -0.588953345 | 7.037241134 | 1.27717E-19 |
| ASAH1     | 0.671071525  | 7.921382198 | 1.28982E-19 |
| CSF3R     | -0.537235457 | 6.482600019 | 1.31594E-19 |
| CIDEB     | -0.313487048 | 6.509137758 | 1.32924E-19 |
| APBB1IP   | -0.411287662 | 6.914888989 | 1.36481E-19 |
| LPCAT3    | -0.700616233 | 7.958737808 | 1.3762E-19  |
| EPB41L3   | -0.533040854 | 7.191335445 | 1.4224E-19  |
| LMNB2     | -0.537777414 | 7.705437481 | 1.42252E-19 |
| HBP1      | 0.460077406  | 9.041397547 | 1.48164E-19 |
| PLK2      | 0.605839951  | 6.953970854 | 1.5501E-19  |



## DEG.infomation

|           |              |             |             |
|-----------|--------------|-------------|-------------|
| SERPINA1  | -0.483730861 | 6.387051166 | 1.56345E-19 |
| IL18BP    | -0.499132944 | 6.502262282 | 1.60785E-19 |
| KCNK12    | -0.698191549 | 6.271947639 | 1.68129E-19 |
| KLHL34    | 0.861720272  | 7.851503201 | 1.71936E-19 |
| CDR2L     | -0.671644583 | 9.031781075 | 1.7492E-19  |
| OSGIN2    | 0.5210365    | 7.7048958   | 1.75919E-19 |
| STK38L    | 0.661257546  | 7.769945116 | 1.7787E-19  |
| LILRB2    | -0.238619557 | 6.220557979 | 1.88644E-19 |
| SLC30A1   | 0.465104737  | 7.283390205 | 2.02113E-19 |
| C21ORF63  | -0.562372507 | 7.621109736 | 2.16664E-19 |
| FBXO32    | 1.035651406  | 10.09198904 | 2.16772E-19 |
| SERPINE1  | -2.020118049 | 7.055587978 | 2.19675E-19 |
| LIN9      | 0.752122043  | 8.040589079 | 2.49393E-19 |
| CTPS      | -0.545919342 | 7.04662763  | 2.62689E-19 |
| PLAU      | -0.727533559 | 7.647648917 | 2.64678E-19 |
| ZMYND12   | 0.576286173  | 7.011557144 | 2.84584E-19 |
| GPRASP2   | 0.452785864  | 7.764745099 | 2.95884E-19 |
| HK3       | -0.456941295 | 6.276644364 | 2.96269E-19 |
| CD59      | -0.762134303 | 8.244701974 | 3.15309E-19 |
| NR2C1     | 0.386359077  | 7.605874313 | 3.17395E-19 |
| ADCY3     | -0.690300616 | 9.217262608 | 3.47448E-19 |
| LDHA      | -0.936015427 | 11.75617719 | 3.69021E-19 |
| FAM107A   | -0.913216949 | 9.948520577 | 3.90694E-19 |
| PKD1L2    | 0.63723996   | 6.871830317 | 3.98334E-19 |
| C1RL      | -0.501304247 | 6.724542349 | 4.04785E-19 |
| MED16     | -0.454657406 | 8.087932943 | 4.1796E-19  |
| RNASE2    | -0.624561082 | 6.243482781 | 4.18168E-19 |
| PNRC2     | 0.409634828  | 9.3809012   | 4.22765E-19 |
| TICAM1    | -0.373011152 | 7.680057413 | 4.23859E-19 |
| FXR1      | 0.392541873  | 9.622587166 | 4.29703E-19 |
| LNX2      | 0.444160094  | 7.719238202 | 4.52266E-19 |
| C4ORF41   | 0.272514037  | 7.914818377 | 4.80502E-19 |
| FKSG30    | -0.913500179 | 8.482071091 | 4.88709E-19 |
| PPP1R3C   | 0.868920767  | 11.97268637 | 4.88714E-19 |
| TRAK2     | 0.622100346  | 11.33118654 | 4.92153E-19 |
| MDFIC     | 0.679763349  | 7.602637947 | 5.24042E-19 |
| THRA      | 0.39949005   | 7.427619707 | 5.24605E-19 |
| CEL       | -0.626699358 | 6.782093375 | 5.48417E-19 |
| OBFC2A    | -0.640169169 | 6.909985643 | 5.78728E-19 |
| ZMYND19   | -0.386806491 | 7.591408043 | 5.93154E-19 |
| MTHFR     | -0.599939449 | 7.39543948  | 6.00883E-19 |
| KTELC1    | -0.6111983   | 7.989761149 | 6.13458E-19 |
| LOC285556 | -1.727003546 | 6.788190465 | 6.64381E-19 |
| ACTB      | -0.871282128 | 11.60902774 | 6.71872E-19 |
| EMILIN1   | -0.619024333 | 7.192822514 | 7.27793E-19 |
| HSPA2     | 1.3869027    | 9.078256802 | 7.44311E-19 |
| AMZ2      | 0.465549911  | 9.904974966 | 7.47363E-19 |
| PRKCQ     | -0.776557147 | 8.034744324 | 7.56368E-19 |
| PTBP1     | -0.564157551 | 10.68093201 | 8.27359E-19 |
| FAM102A   | 0.288292369  | 6.847258176 | 8.33355E-19 |
| LGMN      | -0.498767489 | 8.863110977 | 9.54242E-19 |

## DEG.infomation

|           |              |             |             |
|-----------|--------------|-------------|-------------|
| STXBP2    | -0.509257959 | 6.28421529  | 9.58158E-19 |
| AIF1      | -0.669699197 | 7.328221559 | 9.66801E-19 |
| FYCO1     | 0.796351867  | 10.7015661  | 9.77657E-19 |
| ARF3      | -0.440146201 | 7.448592955 | 9.98356E-19 |
| PDK4      | -1.998476938 | 10.21842091 | 1.02187E-18 |
| TNNT1     | 0.925408338  | 8.06580085  | 1.02685E-18 |
| ISG20     | -1.087698086 | 7.504957892 | 1.07577E-18 |
| FCN1      | -1.281077078 | 7.148845468 | 1.12747E-18 |
| KLF4      | -0.753885263 | 7.035842626 | 1.18399E-18 |
| GRB2      | -0.345057182 | 7.414079702 | 1.21894E-18 |
| THBS4     | 1.274954436  | 11.38449204 | 1.22575E-18 |
| PHGDH     | -0.727314942 | 8.51266329  | 1.2326E-18  |
| MTE       | -0.875648522 | 8.167733677 | 1.23724E-18 |
| LILRA2    | -0.474382858 | 6.173547602 | 1.30346E-18 |
| TEAD2     | -0.486919804 | 10.39354452 | 1.31947E-18 |
| ARPC4     | -0.568472594 | 8.098495413 | 1.35851E-18 |
| RAC2      | -0.689974287 | 7.13371563  | 1.40911E-18 |
| IFI16     | -0.680892959 | 7.850421705 | 1.42928E-18 |
| SLC31A1   | -0.548464739 | 7.418391203 | 1.46148E-18 |
| SBNO2     | -0.377145292 | 6.512097795 | 1.5046E-18  |
| IGSF5     | 0.809052642  | 9.044116142 | 1.52687E-18 |
| UBN1      | -0.534512636 | 8.422004514 | 1.52831E-18 |
| FAM46A    | -0.538916807 | 10.65680994 | 1.54743E-18 |
| TMEM140   | 0.79598168   | 9.184559038 | 1.55478E-18 |
| APOBEC3F  | 0.287533072  | 6.909597472 | 1.58527E-18 |
| LMNA      | -0.512936592 | 9.506594952 | 1.67799E-18 |
| C17ORF70  | -0.519095598 | 8.931322987 | 1.71609E-18 |
| TMEM74    | 0.745286571  | 6.725443536 | 1.72234E-18 |
| ZNF385A   | -0.288436765 | 6.323906745 | 1.75292E-18 |
| ARRDC2    | -0.391090331 | 6.534945639 | 1.76891E-18 |
| SOX4      | 0.670785888  | 7.514014396 | 1.77701E-18 |
| LOC654264 | -0.536766316 | 6.262159339 | 1.7845E-18  |
| GPNMB     | 0.935495942  | 10.66371931 | 1.79294E-18 |
| POLR3H    | -0.322963463 | 6.581256041 | 1.8134E-18  |
| C5AR1     | -0.505073827 | 6.48867394  | 1.8289E-18  |
| EYA1      | 0.485170699  | 7.083120907 | 1.8315E-18  |
| FCGR1B    | -0.384912789 | 6.354194109 | 1.89561E-18 |
| GLRB      | 0.61034537   | 7.914696417 | 1.9108E-18  |
| MKL1      | -0.410813113 | 6.831506926 | 1.96836E-18 |
| C22ORF25  | 0.652496514  | 8.790438251 | 1.99071E-18 |
| TPD52L1   | 0.779128129  | 8.872300613 | 2.00423E-18 |
| ZNF189    | -0.587134489 | 7.864208273 | 2.00668E-18 |
| SLMAP     | 0.525195303  | 12.05883683 | 2.0382E-18  |
| GRRP1     | -0.559704692 | 7.800291321 | 2.10205E-18 |
| MST150    | -0.351536963 | 6.714122518 | 2.20598E-18 |
| ZMPSTE24  | -0.501087565 | 9.972064503 | 2.29359E-18 |
| TNFRSF1B  | -0.5745177   | 7.064466642 | 2.29553E-18 |
| CD276     | -0.454217251 | 6.76117876  | 2.4153E-18  |
| CFD       | -1.453993694 | 10.71739242 | 2.42204E-18 |
| OMD       | 0.78724288   | 7.654714394 | 2.51101E-18 |
| PPP1R14B  | -0.853186393 | 9.621784995 | 2.53573E-18 |

## DEG.infomation

|           |              |             |             |
|-----------|--------------|-------------|-------------|
| GFOD1     | -0.79021959  | 9.53338219  | 2.60014E-18 |
| CENPA     | 1.699105761  | 7.752729554 | 2.69099E-18 |
| ASCC3L1   | 0.373237594  | 7.403749334 | 2.72532E-18 |
| C14ORF135 | 0.681137737  | 9.404951284 | 2.89428E-18 |
| PCK2      | -0.236834894 | 6.25762166  | 2.98157E-18 |
| TSPAN32   | 0.765822454  | 8.42706855  | 3.04192E-18 |
| SERPINI1  | 0.446867781  | 7.137291118 | 3.06194E-18 |
| TM7SF2    | 1.050733175  | 10.01304247 | 3.08705E-18 |
| TMEM14C   | 0.372714827  | 11.60536582 | 3.13366E-18 |
| S100A11   | -0.80914981  | 8.027354802 | 3.26357E-18 |
| SIRT5     | 0.458363534  | 8.510552217 | 3.29959E-18 |
| KIAA1429  | 0.339677219  | 7.699653565 | 3.35648E-18 |
| LOC401397 | 0.787062505  | 11.60726742 | 3.4612E-18  |
| LOC399942 | -0.843959613 | 7.523422031 | 3.54382E-18 |
| TMEM51    | -0.476773445 | 8.258860026 | 3.83685E-18 |
| LYN       | -0.587527301 | 7.613209173 | 4.29103E-18 |
| SGIP1     | 0.740798009  | 7.585311167 | 4.549E-18   |
| SPI1      | -0.343378632 | 6.54556995  | 4.75804E-18 |
| RHOG      | -0.554144393 | 8.350689817 | 4.80807E-18 |
| RCOR3     | 0.500819658  | 9.256304111 | 4.90632E-18 |
| STEAP3    | -0.344361226 | 6.539875034 | 5.13188E-18 |
| MGST3     | 0.462651896  | 13.38988442 | 5.18869E-18 |
| APOLD1    | -1.494669491 | 8.427634231 | 5.2058E-18  |
| PYGL      | -0.38152672  | 6.93626996  | 5.40491E-18 |
| LOC643783 | 0.295957936  | 6.437500292 | 5.50027E-18 |
| FZD1      | 0.51589518   | 7.299123716 | 5.69579E-18 |
| MUC1      | -0.318225667 | 6.319434741 | 5.76183E-18 |
| HSPA4L    | 0.395441058  | 7.100730838 | 5.89648E-18 |
| CCNYL1    | -0.338638232 | 6.74207753  | 6.14985E-18 |
| TMEM149   | -0.49102382  | 6.873181864 | 6.15518E-18 |
| ZNF536    | 0.507030681  | 6.923373587 | 6.38631E-18 |
| S100A12   | -0.613598635 | 6.172056021 | 6.4652E-18  |
| ZNF616    | 0.301194713  | 6.808612527 | 6.54914E-18 |
| ATP2A2    | -0.760917615 | 12.41340482 | 6.61496E-18 |
| C10ORF110 | 0.816287167  | 7.614752671 | 6.78781E-18 |
| KCNA5     | 0.907252933  | 7.938057613 | 6.97048E-18 |
| DNAJC4    | 0.349264018  | 7.099758127 | 7.09894E-18 |
| C12ORF47  | 0.503348395  | 9.872704226 | 7.20246E-18 |
| RGS1      | -0.894146769 | 6.436164755 | 7.39257E-18 |
| ARHGAP9   | -0.409911043 | 6.469857076 | 7.46853E-18 |
| ID3       | -0.676707614 | 9.973402335 | 8.09062E-18 |
| LOC648024 | -0.829891529 | 7.87633999  | 8.15144E-18 |
| FRMD3     | 0.682747021  | 8.686544635 | 8.2519E-18  |
| IER3      | 1.176232337  | 9.223657174 | 8.68971E-18 |
| C13ORF15  | -0.798395499 | 11.05528709 | 8.69196E-18 |
| EDC3      | 0.704947836  | 8.673258433 | 8.97481E-18 |
| GARNL3    | 0.587752146  | 7.947466615 | 9.02463E-18 |
| FAM129B   | -0.516806822 | 8.573541765 | 9.0458E-18  |
| RNASE1    | -0.706189214 | 9.329227513 | 9.24406E-18 |
| SMTNL2    | -0.583227975 | 6.485768757 | 9.50439E-18 |
| SNX13     | 0.462684929  | 7.99075626  | 9.86656E-18 |

## DEG.infomation

|           |              |             |             |
|-----------|--------------|-------------|-------------|
| FGD3      | -0.465276903 | 7.074243345 | 9.972E-18   |
| C1ORF105  | -0.399427336 | 6.386479365 | 1.05541E-17 |
| PDGFRB    | -0.66891769  | 9.72524823  | 1.0639E-17  |
| CD33      | -0.377098094 | 6.292472066 | 1.08969E-17 |
| SLC7A5    | -0.929917676 | 6.979620293 | 1.11241E-17 |
| FAM46B    | -1.073498976 | 8.051599923 | 1.20299E-17 |
| PUF60     | -0.419130603 | 10.89966979 | 1.23521E-17 |
| CLIC1     | -0.883362519 | 9.716498784 | 1.24816E-17 |
| FPR3      | -0.497672501 | 6.608298151 | 1.36074E-17 |
| B4GALT5   | -0.533720507 | 9.581337671 | 1.37998E-17 |
| GCA       | -0.564612526 | 7.59768294  | 1.38052E-17 |
| SOCS1     | -0.630781111 | 6.41253047  | 1.45932E-17 |
| SLC31A2   | -0.506841589 | 7.950730072 | 1.46529E-17 |
| SNF1LK    | -0.994204823 | 6.846204153 | 1.46697E-17 |
| LOC642897 | 0.562602208  | 8.094655208 | 1.49346E-17 |
| KLHL13    | 0.42160115   | 7.041218572 | 1.55299E-17 |
| YARS      | -0.52945853  | 9.261331831 | 1.56627E-17 |
| TMCO3     | 0.60465623   | 8.536052135 | 1.59056E-17 |
| BRD8      | 0.302102035  | 7.512025613 | 1.60075E-17 |
| CACNA1H   | -0.413455024 | 7.060044022 | 1.66001E-17 |
| BDNF      | 0.543270869  | 6.812731114 | 1.70616E-17 |
| COMMD1    | 0.491027642  | 11.1368411  | 1.82308E-17 |
| FLJ35801  | -0.417800048 | 6.423568913 | 1.85466E-17 |
| USP46     | 0.59919467   | 8.344532391 | 1.86609E-17 |
| MLKL      | -0.383664402 | 6.694300099 | 1.93319E-17 |
| PHF3      | 0.470368931  | 8.903001549 | 1.97616E-17 |
| TMEM56    | 0.633408587  | 7.695508394 | 2.03507E-17 |
| ATPBD4    | 0.343288602  | 7.130626786 | 2.05629E-17 |
| LHFPL2    | -0.654792497 | 7.637478516 | 2.06946E-17 |
| TRIM39    | 0.238576841  | 7.332363594 | 2.09758E-17 |
| DRAM      | -0.433627785 | 7.234390787 | 2.15667E-17 |
| MYADM     | -0.576553209 | 9.802801934 | 2.15916E-17 |
| LILRA3    | -0.357624159 | 6.161228139 | 2.19086E-17 |
| XPO4      | 0.77295963   | 9.988280595 | 2.24445E-17 |
| TTYH3     | -0.404492853 | 6.636528712 | 2.30517E-17 |
| CCL2      | -1.436967943 | 8.394104274 | 2.31723E-17 |
| PTCD2     | 0.410371548  | 7.504266989 | 2.33654E-17 |
| GPBAR1    | -0.404934751 | 6.55403612  | 2.56154E-17 |
| RNF20     | 0.55299308   | 9.730055893 | 2.66906E-17 |
| UNQ2541   | -0.42280156  | 6.145817989 | 2.73442E-17 |
| ZNF30     | 0.385442163  | 7.409824719 | 2.7546E-17  |
| ARPC5L    | -0.608634664 | 9.187141238 | 2.77444E-17 |
| ADFP      | -1.158514398 | 9.550061749 | 2.80172E-17 |
| HRK       | 0.548790566  | 6.486890906 | 2.83017E-17 |
| SOX18     | -0.871028238 | 10.652518   | 2.86689E-17 |
| CXCR7     | 0.820615502  | 9.899600272 | 2.89857E-17 |
| IL15RA    | -0.207496146 | 6.184521417 | 2.93843E-17 |
| ITPR3     | -0.635472617 | 9.204273678 | 2.96264E-17 |
| MAGOH     | -0.581521127 | 7.355142734 | 2.98087E-17 |
| NEDD9     | -0.552408047 | 6.975573223 | 3.01603E-17 |
| FLJ23584  | 0.407092178  | 7.069080203 | 3.11555E-17 |

## DEG.infomation

|           |              |             |             |
|-----------|--------------|-------------|-------------|
| KIAA1303  | 0.24294168   | 6.492138726 | 3.16179E-17 |
| UPF3B     | 0.323076276  | 7.522501415 | 3.19606E-17 |
| FLJ27354  | 0.488020438  | 7.254795776 | 3.20127E-17 |
| ZNF16     | 0.245719652  | 6.87448468  | 3.28784E-17 |
| PYCARD    | -0.423258023 | 7.03471858  | 3.40617E-17 |
| GADD45G   | -1.231088708 | 9.573987199 | 3.46239E-17 |
| LRP5      | 0.41330811   | 8.064765018 | 3.47132E-17 |
| BBS4      | 0.472789229  | 8.184333234 | 3.59633E-17 |
| ST8SIA5   | 0.711023904  | 7.795842141 | 3.69578E-17 |
| CSK       | -0.515290513 | 8.188939891 | 3.70717E-17 |
| ZNF502    | 0.229356497  | 6.76750764  | 3.8807E-17  |
| EIF4ENIF1 | 0.324261673  | 8.345234488 | 3.90168E-17 |
| PTHR1     | -0.610088272 | 8.167869394 | 3.9055E-17  |
| TLL2      | 0.598733568  | 6.891761471 | 3.91833E-17 |
| TAF15     | 1.020381594  | 9.63275622  | 4.00383E-17 |
| C6ORF111  | 0.487045573  | 8.660147725 | 4.01627E-17 |
| FURIN     | -0.459437601 | 7.052534819 | 4.09552E-17 |
| POLR1E    | 0.527164039  | 8.352488794 | 4.12229E-17 |
| SUSD1     | -0.457268091 | 7.023932184 | 4.16374E-17 |
| NT5DC3    | -0.511097983 | 7.171617144 | 4.29299E-17 |
| NBPF10    | -0.682541661 | 6.839014909 | 4.33329E-17 |
| TUBG1     | -0.421980371 | 8.200730962 | 4.34022E-17 |
| PAFAH1B3  | -0.424642098 | 6.703313307 | 4.53643E-17 |
| ARHGDI1   | -0.621536556 | 8.838313148 | 4.54654E-17 |
| LY96      | -0.912912928 | 8.134008324 | 4.8203E-17  |
| LMCD1     | -1.431687064 | 9.35588141  | 4.83181E-17 |
| SPTBN1    | 0.520929831  | 9.944769561 | 4.95123E-17 |
| PROM1     | 1.185860835  | 8.682228608 | 4.98042E-17 |
| FADD      | -0.413299629 | 8.099238089 | 5.3427E-17  |
| ZNF671    | 0.373200532  | 7.907548301 | 5.44327E-17 |
| LOC374395 | -0.406121138 | 10.0712225  | 5.6126E-17  |
| C14ORF28  | 0.555356791  | 7.819144365 | 5.65595E-17 |
| ETS2      | -0.573209584 | 8.53930326  | 5.68086E-17 |
| LARP7     | 0.416322119  | 9.15077002  | 5.7428E-17  |
| NINJ2     | -0.594077135 | 7.672593466 | 5.88002E-17 |
| FGF1      | 0.347090661  | 6.724967638 | 5.92825E-17 |
| C9ORF24   | 0.593025277  | 8.444622334 | 5.94177E-17 |
| ADAMTS9   | -0.977980024 | 7.791870076 | 6.02784E-17 |
| LOC647000 | -0.586348594 | 10.745267   | 6.15462E-17 |
| CCR1      | -0.329142898 | 6.255820054 | 6.16711E-17 |
| MORN4     | 0.396939552  | 6.793972459 | 6.17431E-17 |
| HMOX1     | -0.495647314 | 6.37284608  | 6.39291E-17 |
| LRSAM1    | -0.406042617 | 7.679381236 | 6.93534E-17 |
| CXCL2     | -0.830697034 | 6.733744309 | 7.48665E-17 |
| GLIPR1    | -0.507212952 | 6.617044467 | 7.71351E-17 |
| MFN2      | 0.594411067  | 11.38076346 | 7.76803E-17 |
| CCND3     | -0.448104143 | 10.75394143 | 8.25893E-17 |
| RBM20     | 0.823559513  | 11.21083464 | 8.32432E-17 |
| NLRP3     | -0.252057618 | 6.254072254 | 8.41422E-17 |
| MOAP1     | 0.575112695  | 9.534782456 | 8.49409E-17 |
| SKP1A     | 0.347835901  | 9.119569927 | 9.72498E-17 |

## DEG.infomation

|          |              |             |             |
|----------|--------------|-------------|-------------|
| UBE2J1   | -0.557659858 | 7.852577044 | 1.00905E-16 |
| COL4A5   | 0.552630416  | 7.661007126 | 1.08522E-16 |
| BTK      | -0.452004357 | 6.314905838 | 1.08918E-16 |
| SLC7A7   | -0.590315739 | 7.222942328 | 1.12005E-16 |
| CX3CR1   | 0.487440568  | 6.835194018 | 1.12629E-16 |
| WARS     | -0.711361248 | 9.655084481 | 1.13941E-16 |
| SPOCK1   | -0.983287601 | 8.254305933 | 1.18556E-16 |
| CAPN3    | 0.437275576  | 6.778481638 | 1.20565E-16 |
| TSC1     | 0.499058449  | 8.466388694 | 1.24167E-16 |
| SLC2A6   | -0.433750952 | 6.994345402 | 1.26503E-16 |
| C3AR1    | -0.379341799 | 6.330710335 | 1.37152E-16 |
| KIAA1468 | 0.252918377  | 7.417021123 | 1.45712E-16 |
| PPM1G    | -0.432347229 | 9.261876275 | 1.57746E-16 |
| PDGFRA   | -0.689360336 | 8.410832716 | 1.61927E-16 |
| MYD88    | -0.349683652 | 6.781480844 | 1.67995E-16 |
| PPCS     | 0.40772888   | 9.602271881 | 1.69188E-16 |
| TIMP4    | -0.854768313 | 7.770136009 | 1.71591E-16 |
| NOL6     | -0.419823428 | 7.855588232 | 1.71902E-16 |
| PMM1     | 0.337200137  | 9.18761892  | 1.72221E-16 |
| C5ORF37  | 0.268731682  | 7.179430887 | 1.73962E-16 |
| TUBA1A   | -0.615394793 | 11.06033385 | 1.74026E-16 |
| NMNAT3   | 0.416206627  | 7.759932237 | 1.79087E-16 |
| MYCN     | 0.336300791  | 6.360801185 | 1.79362E-16 |
| ZNF277   | 0.502502606  | 8.516665013 | 1.8586E-16  |
| SNCA     | 1.012257804  | 8.096976655 | 1.89594E-16 |
| SFRP4    | 0.947146334  | 6.987260789 | 1.90165E-16 |
| LANCL1   | 0.413923494  | 10.1017887  | 1.98047E-16 |
| PRDX6    | -0.455173553 | 11.93640386 | 2.04158E-16 |
| AQP9     | -0.6591233   | 6.541413637 | 2.07735E-16 |
| UNC45B   | 0.408243645  | 7.188125149 | 2.10171E-16 |
| PLSCR3   | -0.520299358 | 10.35556757 | 2.11958E-16 |
| NOL1     | -0.465319167 | 7.440569193 | 2.22532E-16 |
| FCGBP    | -0.818559275 | 6.706677405 | 2.23141E-16 |
| GAB1     | 0.339693408  | 6.790331386 | 2.23985E-16 |
| ZFP90    | 0.380953402  | 8.374795622 | 2.25739E-16 |
| LRCH4    | -0.452119108 | 6.952891225 | 2.28391E-16 |
| P2RY11   | -0.345660272 | 6.715253112 | 2.28916E-16 |
| IL4R     | -0.349031856 | 6.549022994 | 2.29109E-16 |
| MAP2K1   | -0.757100528 | 9.148082085 | 2.34017E-16 |
| CPT1B    | 0.75426414   | 9.422929995 | 2.36961E-16 |
| GABRB1   | 0.821748304  | 7.73275612  | 2.41612E-16 |
| TGFBR3   | -0.645174858 | 8.847316943 | 2.48466E-16 |
| RDH5     | -0.862937151 | 8.273152798 | 2.52392E-16 |
| PNPLA4   | 0.408769929  | 7.009180901 | 2.55403E-16 |
| MLLT11   | 1.084993822  | 11.00966006 | 2.55999E-16 |
| GRK4     | 0.34579148   | 6.854785462 | 2.65919E-16 |
| HLF      | 0.655439023  | 7.786693779 | 2.72693E-16 |
| TMEM42   | 0.48794428   | 8.710357933 | 2.79489E-16 |
| ELL      | -0.294057964 | 7.246604345 | 2.82198E-16 |
| EIF4A1   | -0.732779329 | 11.61029812 | 2.84224E-16 |
| LFNG     | 0.557299214  | 7.206335626 | 2.9355E-16  |

## DEG.infomation

|          |              |             |             |
|----------|--------------|-------------|-------------|
| SLC44A3  | -0.432031245 | 6.693232632 | 2.99515E-16 |
| MMP9     | -0.438864948 | 6.111823159 | 3.10972E-16 |
| DCUN1D2  | 0.597448274  | 7.861901887 | 3.11012E-16 |
| KIAA1370 | 0.523200231  | 8.175566096 | 3.11148E-16 |
| PLA2G15  | 0.54685491   | 8.260128389 | 3.19275E-16 |
| CCDC109B | -0.825030125 | 7.999999341 | 3.25616E-16 |
| REXO1    | -0.318687981 | 7.246160779 | 3.41884E-16 |
| NPTX2    | -1.049951791 | 6.754437362 | 3.46564E-16 |
| PTPRM    | 0.467490734  | 10.33253806 | 3.53944E-16 |
| CLIC6    | 1.355220831  | 9.624450586 | 3.59014E-16 |
| SAMSN1   | -0.222151215 | 6.144566842 | 3.60594E-16 |
| CTF1     | 0.357713735  | 7.036617048 | 3.69614E-16 |
| ZNF564   | 0.319920101  | 7.792321137 | 3.7469E-16  |
| MDP-1    | 0.349083607  | 7.959745915 | 3.76385E-16 |
| FLJ21986 | 0.616904211  | 9.008624956 | 3.77434E-16 |
| PVR      | -0.754558275 | 7.132487111 | 3.78518E-16 |
| TAP1     | -0.712357831 | 9.181414069 | 3.79482E-16 |
| GAK      | -0.347473795 | 7.701124146 | 4.01008E-16 |
| C10ORF97 | 0.389173236  | 8.769709211 | 4.02001E-16 |
| CD300C   | -0.257524958 | 6.140951916 | 4.02424E-16 |
| ASB3     | 0.224447318  | 7.434967504 | 4.08774E-16 |
| PSMB8    | -0.39198003  | 7.218708187 | 4.10408E-16 |
| SLC16A3  | -0.804721344 | 7.644357259 | 4.17216E-16 |
| YTHDC1   | 0.326481851  | 9.338327902 | 4.17292E-16 |
| MTHFD2   | -0.573860838 | 7.793608296 | 4.19823E-16 |
| VAR5     | -0.335167826 | 6.997261015 | 4.20852E-16 |
| UCRC     | 0.379868673  | 9.240478549 | 4.2932E-16  |
| TMEM71   | 0.974712916  | 9.442847766 | 4.32305E-16 |
| FAM89A   | -0.356289208 | 7.343679942 | 4.39444E-16 |
| CDKL3    | 0.239484534  | 6.918735377 | 4.58546E-16 |
| LRRC32   | -0.666837333 | 9.03272418  | 4.61923E-16 |
| CCDC41   | 0.504485305  | 7.520626463 | 4.68097E-16 |
| AKAP8    | -0.340759217 | 7.828723923 | 4.75952E-16 |
| ZNHIT3   | 0.321558459  | 9.11940212  | 4.84048E-16 |
| PDE4D    | -0.755201743 | 7.962111688 | 4.99121E-16 |
| CD86     | -0.243930249 | 6.466879358 | 5.0307E-16  |
| FASN     | -0.738146786 | 8.415772863 | 5.03928E-16 |
| SYK      | -0.444065078 | 6.711685912 | 5.08066E-16 |
| DCLK2    | 0.52282381   | 7.408523169 | 5.08496E-16 |
| MYH7B    | 0.89303973   | 9.232718383 | 5.34914E-16 |
| STEAP4   | -0.415219584 | 6.197529607 | 5.37596E-16 |
| MS4A4A   | -0.335657445 | 6.454623624 | 5.44965E-16 |
| SH2D3C   | -0.329551333 | 7.281077354 | 5.72338E-16 |
| PDZD2    | 0.501230749  | 8.754140365 | 5.84517E-16 |
| CRSP2    | 0.256618971  | 6.771647892 | 5.93597E-16 |
| C11ORF74 | 0.476464608  | 9.77861106  | 6.10371E-16 |
| SPPL2A   | -0.642187703 | 9.049958313 | 6.17312E-16 |
| CHMP5    | 0.501997013  | 9.162648246 | 6.34521E-16 |
| TPD52    | 0.198839746  | 6.549648873 | 6.35422E-16 |
| ABL1     | -0.312161869 | 7.688130068 | 6.42732E-16 |
| ANKRA2   | 0.443914922  | 8.124001489 | 6.50476E-16 |

## DEG.infomation

|           |              |             |             |
|-----------|--------------|-------------|-------------|
| RCN1      | -0.537839941 | 8.789050397 | 6.57905E-16 |
| CDKN2D    | -0.341482807 | 6.837733329 | 6.65674E-16 |
| DNAJC15   | 0.51767096   | 9.360619553 | 6.83359E-16 |
| U2AF2     | -0.373980633 | 8.661571814 | 6.9937E-16  |
| DPY19L2   | 0.679470301  | 8.619515521 | 7.12609E-16 |
| CLDND2    | 0.516007147  | 7.797247313 | 7.15002E-16 |
| NAMPT     | -0.877879963 | 7.459401123 | 7.23214E-16 |
| ZNF664    | -0.572940143 | 6.618458525 | 7.41402E-16 |
| RRAGB     | 0.331732357  | 7.645314631 | 7.49414E-16 |
| CCDC121   | 0.292875874  | 6.826026635 | 7.57596E-16 |
| SEC23B    | -0.422154144 | 7.528931562 | 7.74971E-16 |
| TMUB1     | -0.485933401 | 8.241022834 | 7.75095E-16 |
| PDE7A     | -0.585833732 | 7.697242169 | 7.77218E-16 |
| FMO4      | 0.512487751  | 7.553734199 | 7.77824E-16 |
| PVRL2     | -0.360304613 | 7.361968869 | 7.82456E-16 |
| RNASE6    | -0.501397516 | 6.642434524 | 7.8712E-16  |
| C14ORF147 | -0.364654144 | 8.175863424 | 8.05281E-16 |
| CAP1      | -0.607724767 | 10.0473434  | 8.44231E-16 |
| NXT1      | -0.49393077  | 8.487506522 | 8.6408E-16  |
| OXCT1     | 0.639192833  | 9.786647706 | 8.8427E-16  |
| FAM164A   | 0.380296677  | 7.264015728 | 9.04006E-16 |
| H2AFY     | -0.315741917 | 9.867806503 | 9.40194E-16 |
| SLC25A22  | -0.401048102 | 6.700639786 | 9.92863E-16 |
| PAAF1     | 0.367857468  | 8.120100382 | 1.00645E-15 |
| TMED9     | -0.684590619 | 9.483598994 | 1.01107E-15 |
| IGFBP4    | -0.778915473 | 9.229406183 | 1.02532E-15 |
| CTSF      | 0.583216376  | 8.540245948 | 1.0391E-15  |
| EMP3      | -0.662175818 | 9.685941686 | 1.06727E-15 |
| TRIM8     | -0.417836815 | 10.29540838 | 1.0832E-15  |
| ATP1B2    | 0.408095745  | 7.33540694  | 1.09282E-15 |
| RCC2      | -0.535551971 | 8.978650105 | 1.11114E-15 |
| RAMP1     | -0.756338533 | 9.708930958 | 1.12127E-15 |
| TYRP1     | 0.90626692   | 9.519295848 | 1.12173E-15 |
| DUSP28    | 0.614030668  | 9.367032726 | 1.12978E-15 |
| SMARCD2   | -0.411410717 | 6.77788788  | 1.13804E-15 |
| RIN2      | 0.420166811  | 9.42897373  | 1.1597E-15  |
| ZBTB4     | 0.491514634  | 10.10161363 | 1.16696E-15 |
| H2AFZ     | -0.535783793 | 10.66411576 | 1.21703E-15 |
| GPSM2     | -0.529083998 | 6.363509366 | 1.23791E-15 |
| SLC2A12   | 0.778882051  | 8.721583289 | 1.24542E-15 |
| C6ORF130  | 0.34354344   | 8.622363166 | 1.25904E-15 |
| C7ORF44   | 0.365318803  | 10.53015053 | 1.26106E-15 |
| LOC650832 | -0.893221492 | 9.082089421 | 1.28226E-15 |
| TFDP2     | 0.369563026  | 7.45325574  | 1.30883E-15 |
| MDK       | 0.29748827   | 6.723427762 | 1.31167E-15 |
| LOC606724 | -0.269054721 | 6.229508404 | 1.32334E-15 |
| GMPR2     | 0.269125873  | 8.43539092  | 1.33512E-15 |
| NPR3      | 0.719636172  | 7.260156062 | 1.33774E-15 |
| KIAA1394  | 0.611448264  | 7.569108955 | 1.34492E-15 |
| APBB3     | 0.487974295  | 8.610218675 | 1.36804E-15 |
| SKAP2     | -0.294295908 | 6.509622479 | 1.39057E-15 |



## DEG.infomation

|           |              |             |             |
|-----------|--------------|-------------|-------------|
| MAP2K5    | 0.339918263  | 7.316607223 | 1.42757E-15 |
| HLA-DRB4  | -0.839372003 | 8.562945259 | 1.44105E-15 |
| BAIAP2L1  | -0.271993049 | 6.433846867 | 1.50237E-15 |
| FTL       | -0.569764551 | 12.54645628 | 1.50353E-15 |
| WDR48     | 0.413157823  | 8.383211409 | 1.50673E-15 |
| PTP4A2    | -0.408788903 | 9.13938087  | 1.59025E-15 |
| GYS1      | 0.502483893  | 9.089739594 | 1.59162E-15 |
| PPRC1     | -0.471965713 | 7.910943404 | 1.64168E-15 |
| ESRRB     | 0.325641238  | 6.668755001 | 1.66951E-15 |
| MUM1L1    | 0.695280801  | 7.514298518 | 1.69948E-15 |
| MTP18     | -0.731276068 | 8.038412783 | 1.71105E-15 |
| TMEM16A   | 0.570305137  | 8.034467854 | 1.76069E-15 |
| PSTPIP2   | -0.315445448 | 6.537662466 | 1.76447E-15 |
| LOC730525 | -0.642857892 | 9.446514397 | 1.87813E-15 |
| HNRNPAB   | -0.44832728  | 10.28232298 | 1.92306E-15 |
| S100A3    | -0.656185898 | 6.515507866 | 2.01534E-15 |
| KLHL3     | -0.733718447 | 9.510377973 | 2.04529E-15 |
| RAB3IL1   | -0.5116838   | 8.399259066 | 2.08563E-15 |
| FAIM2     | -0.46043403  | 6.392373518 | 2.10632E-15 |
| DPH2      | -0.468263404 | 7.667373983 | 2.10705E-15 |
| POP5      | 0.403006664  | 7.980228442 | 2.12622E-15 |
| PPWD1     | 0.296261614  | 7.593880297 | 2.17329E-15 |
| SSPN      | 0.635788486  | 9.268240258 | 2.24211E-15 |
| BOP1      | -0.49108525  | 9.543896165 | 2.2635E-15  |
| ZDHC18    | -0.338464541 | 6.729527731 | 2.40744E-15 |
| RASSF2    | -0.416600868 | 6.772575895 | 2.44854E-15 |
| VPS8      | 0.500366892  | 8.501988664 | 2.49583E-15 |
| SLCO3A1   | -0.33392481  | 7.533603296 | 2.49606E-15 |
| KIAA1949  | -0.502484666 | 7.767724541 | 2.5047E-15  |
| TP53INP1  | 0.540428964  | 7.767595157 | 2.52036E-15 |
| FNBP4     | 0.582774908  | 10.20066046 | 2.62116E-15 |
| C17ORF58  | -0.355595772 | 7.589838976 | 2.66404E-15 |
| POR       | -0.554259952 | 7.485951782 | 2.72915E-15 |
| PRMT2     | 0.421427328  | 8.363918442 | 2.75885E-15 |
| SLC38A3   | 0.266186908  | 6.278550416 | 2.77633E-15 |
| ST8SIA2   | 0.747469569  | 7.507589219 | 2.80382E-15 |
| ZEB1      | 0.475366016  | 7.264958035 | 2.89805E-15 |
| C12ORF44  | -0.47804904  | 8.43217818  | 2.94384E-15 |
| ZBTB25    | 0.288265426  | 6.787588427 | 3.01023E-15 |
| ACYP2     | 0.533768824  | 9.309040034 | 3.06233E-15 |
| LETMD1    | 0.355229302  | 7.556186209 | 3.12644E-15 |
| STAB1     | -0.569278733 | 7.596117275 | 3.26473E-15 |
| ZNF17     | 0.319534805  | 8.017816062 | 3.33666E-15 |
| SLC36A4   | -0.464486291 | 7.023070879 | 3.38642E-15 |
| MPHOSPH8  | 0.375751378  | 8.456544889 | 3.40742E-15 |
| LOC723972 | 0.600642428  | 7.926472175 | 3.42998E-15 |
| MYOM1     | 0.537880966  | 13.99956863 | 3.44538E-15 |
| TESK1     | -0.425297419 | 8.078832019 | 3.60903E-15 |
| AGTR1     | -0.317441857 | 6.371687991 | 3.76533E-15 |
| CFL1      | -0.496449793 | 11.09790102 | 3.77097E-15 |
| LOC647346 | 0.646528388  | 8.63615768  | 3.81776E-15 |

## DEG.infomation

|           |              |             |             |
|-----------|--------------|-------------|-------------|
| ZMAT1     | 0.155077596  | 6.182963369 | 3.87818E-15 |
| RAB7B     | 0.344651269  | 6.563104617 | 3.93021E-15 |
| KCNJ2     | 0.655152139  | 9.065962003 | 4.04362E-15 |
| NSL1      | 0.263475043  | 7.695319719 | 4.0917E-15  |
| ICAM2     | -0.545535968 | 9.819824135 | 4.20235E-15 |
| PLAG1     | 0.232503235  | 6.682414678 | 4.24517E-15 |
| CAV3      | 0.473138886  | 7.391689692 | 4.32989E-15 |
| EIF2B4    | -0.325160054 | 9.49047814  | 4.37667E-15 |
| XPC       | 0.39201578   | 8.358883614 | 4.46886E-15 |
| DPM1      | 0.397944058  | 10.10958607 | 4.54552E-15 |
| DYRK4     | 0.32175251   | 8.70117578  | 4.58228E-15 |
| CRLF3     | -0.246028182 | 6.852422828 | 4.62368E-15 |
| GALNT17   | 0.471821755  | 7.092180001 | 4.71929E-15 |
| OCIAD2    | -0.457044957 | 8.305168984 | 4.90293E-15 |
| MFSD1     | -0.404396883 | 9.194672527 | 4.94485E-15 |
| OGFR      | -0.324698098 | 7.344659692 | 4.96804E-15 |
| LOC441019 | -0.370072732 | 6.423188999 | 5.14781E-15 |
| LEFTY2    | 0.546687367  | 6.841402399 | 5.15726E-15 |
| TRIB1     | -1.019853839 | 9.491518728 | 5.26078E-15 |
| PLA2G4C   | 0.628800218  | 10.11825753 | 5.26339E-15 |
| BAX       | -0.317240899 | 6.627445807 | 5.5493E-15  |
| GGT5      | -0.369182853 | 6.533711934 | 5.85588E-15 |
| FLAD1     | -0.243177629 | 8.069622889 | 5.88909E-15 |
| SLC40A1   | 0.48072056   | 8.240389262 | 5.91874E-15 |
| BLM       | -0.485515974 | 6.573034362 | 5.94499E-15 |
| GATAD2A   | -0.546083794 | 8.659548604 | 5.97711E-15 |
| FRMD4A    | -0.519848918 | 8.165099401 | 6.18069E-15 |
| CLEC10A   | -0.218047902 | 6.273404496 | 6.37117E-15 |
| LOC643888 | 0.341212714  | 6.987421449 | 6.41641E-15 |
| EFR3A     | 0.373718466  | 10.11314701 | 6.49127E-15 |
| RWDD3     | 0.386495697  | 7.328798363 | 6.50039E-15 |
| SCRN1     | 0.642066573  | 8.694226959 | 6.52925E-15 |
| ST3GAL1   | -0.469724271 | 9.089977672 | 6.57203E-15 |
| KIAA0427  | -0.573183337 | 8.32181886  | 6.58897E-15 |
| ZCCHC5    | 0.219115238  | 6.217909938 | 6.6061E-15  |
| IK        | 0.358412342  | 9.22297254  | 6.7091E-15  |
| RNF145    | -0.403866641 | 7.613259785 | 7.16375E-15 |
| SOCS3     | -0.358688541 | 6.216214423 | 7.52118E-15 |
| FLJ20273  | -0.272590195 | 6.091013531 | 7.54844E-15 |
| PRR16     | 0.51664988   | 8.005867122 | 7.54895E-15 |
| LLGL1     | 0.445096387  | 8.266125531 | 7.58561E-15 |
| ITGB4BP   | -0.623047999 | 8.975047691 | 7.67559E-15 |
| LDLR      | -1.006436628 | 8.691374264 | 8.31086E-15 |
| TCTEX1D2  | 0.488563059  | 7.931333972 | 8.53573E-15 |
| SDCCAG1   | 0.364122857  | 8.002802593 | 8.98216E-15 |
| SHISA2    | 0.442202074  | 6.417426955 | 9.07741E-15 |
| ZBED4     | -0.293229126 | 6.839757154 | 9.1769E-15  |
| KIAA1217  | 0.373197979  | 7.90476543  | 9.17707E-15 |
| FMOD      | 1.091335288  | 8.009102118 | 9.69344E-15 |
| M160      | -0.38637614  | 6.628836974 | 1.00977E-14 |
| STAMBPL1  | 0.432473564  | 7.703254767 | 1.03334E-14 |

## DEG.infomation

|            |              |             |             |
|------------|--------------|-------------|-------------|
| SCO2       | -0.439167187 | 8.855239757 | 1.04826E-14 |
| ZFP82      | 0.352519529  | 7.489827442 | 1.08144E-14 |
| C14ORF106  | 0.367533016  | 7.877547555 | 1.10541E-14 |
| ZNF404     | 0.352762984  | 7.004784051 | 1.11838E-14 |
| TAF1       | 0.27310669   | 6.662536474 | 1.12166E-14 |
| MTRF1L     | -0.249628048 | 8.913911169 | 1.15736E-14 |
| RCBTB2     | 0.285626867  | 7.363725144 | 1.16477E-14 |
| MATN2      | 0.739024682  | 9.03653346  | 1.16705E-14 |
| SLC25A27   | 0.391308712  | 7.223725901 | 1.20864E-14 |
| ZRANB2     | 0.34083484   | 9.323529294 | 1.27072E-14 |
| SAT1       | -0.853226493 | 10.98271084 | 1.27277E-14 |
| DOPEY1     | 0.35848237   | 7.216769146 | 1.29448E-14 |
| MAP6       | 0.179883604  | 6.393600507 | 1.32412E-14 |
| ZNF615     | 0.397577601  | 8.355885769 | 1.33302E-14 |
| ISCU       | 0.539235965  | 12.03745565 | 1.33845E-14 |
| GMPPB      | -0.309354476 | 6.926590061 | 1.3548E-14  |
| SLC24A6    | -0.384798835 | 7.846286303 | 1.35556E-14 |
| LMTK2      | 0.358042246  | 6.966098566 | 1.38612E-14 |
| CLEC4G     | -0.359633934 | 6.219849593 | 1.39696E-14 |
| SERTAD1    | -0.77807523  | 8.628465717 | 1.39737E-14 |
| TUBB4Q     | -0.606713667 | 7.701653721 | 1.40102E-14 |
| TMEM126B   | 0.341644283  | 10.24462792 | 1.46857E-14 |
| C9ORF125   | 0.377286632  | 7.643794548 | 1.48446E-14 |
| CCDC25     | 0.30436323   | 8.931591041 | 1.50807E-14 |
| MPDU1      | -0.37765723  | 7.053943154 | 1.51988E-14 |
| LRRC39     | 0.882307466  | 8.988726398 | 1.52253E-14 |
| TBC1D16    | -0.341533046 | 7.339011716 | 1.52381E-14 |
| SH3GL1     | -0.304605233 | 6.98836941  | 1.55567E-14 |
| ISLR       | 0.331548368  | 6.584214056 | 1.55858E-14 |
| SLITRK4    | 1.260442169  | 7.741740727 | 1.60076E-14 |
| E2F4       | -0.389701735 | 8.483122751 | 1.6133E-14  |
| SCUBE2     | 0.509327601  | 6.607964521 | 1.70803E-14 |
| RP9        | 0.345329739  | 9.47803074  | 1.74719E-14 |
| LOC730063  | 0.364431488  | 7.300454207 | 1.80204E-14 |
| RAB8A      | -0.406981013 | 8.321658705 | 1.847E-14   |
| PRRX1      | 0.633854147  | 9.409699187 | 1.86057E-14 |
| BRMS1      | -0.464509276 | 8.600451817 | 1.86272E-14 |
| FST        | -0.314394788 | 7.357340626 | 1.8635E-14  |
| SPP1       | -1.116975344 | 7.098378908 | 1.88002E-14 |
| CDKN2AIP   | 0.302344995  | 7.418958791 | 1.91716E-14 |
| SEPSECS    | 0.219174687  | 6.686248581 | 1.91985E-14 |
| TMSB10     | -0.550884186 | 12.40921712 | 1.9822E-14  |
| GLDN       | 0.741650053  | 8.088220807 | 2.02735E-14 |
| ATPAF1     | 0.456930768  | 10.53708311 | 2.04855E-14 |
| CATSPER2P1 | 0.231395913  | 6.686143256 | 2.05791E-14 |
| TRIM41     | 0.383193129  | 7.615245921 | 2.06314E-14 |
| PSPH       | 0.238799442  | 6.804722621 | 2.10722E-14 |
| APOA1      | 1.584427169  | 9.75381417  | 2.17025E-14 |
| BBS2       | 0.47474764   | 9.042648681 | 2.23657E-14 |
| PITPNM1    | -0.471845565 | 8.738606106 | 2.24759E-14 |
| LOC402221  | -0.662496212 | 7.391900371 | 2.25786E-14 |

## DEG.infomation

|           |              |             |             |
|-----------|--------------|-------------|-------------|
| ZNF816A   | 0.314070837  | 7.21550526  | 2.32972E-14 |
| C17ORF62  | -0.39575335  | 7.612778119 | 2.4668E-14  |
| COL7A1    | 0.585047803  | 8.543720847 | 2.47703E-14 |
| SLC11A2   | -0.391944501 | 8.669473514 | 2.47877E-14 |
| SLC3A2    | -0.332711029 | 7.170048534 | 2.48358E-14 |
| FAM65A    | -0.381315997 | 10.06433984 | 2.50548E-14 |
| C1ORF24   | 0.583514608  | 12.53253942 | 2.5145E-14  |
| CYP4B1    | -0.621546372 | 6.566040756 | 2.60197E-14 |
| IHPK3     | -0.679875839 | 7.751782136 | 2.67202E-14 |
| FAM98C    | 0.309010244  | 7.036722345 | 2.72913E-14 |
| HCFC1     | -0.332505145 | 9.82235437  | 2.73814E-14 |
| WDR1      | -0.437372463 | 10.27847961 | 2.7582E-14  |
| ZNF433    | 0.320116807  | 7.116713256 | 2.85196E-14 |
| PFN1      | -0.430217935 | 11.58782453 | 2.90487E-14 |
| NDP       | 0.498104882  | 6.734385066 | 2.94038E-14 |
| TMEM2     | -0.497361569 | 6.997731689 | 3.09826E-14 |
| LGTN      | 0.318823062  | 8.226057119 | 3.17535E-14 |
| TNFRSF14  | -0.484006821 | 9.405992942 | 3.18458E-14 |
| MYOZ3     | 0.767026291  | 8.401723576 | 3.2027E-14  |
| BIRC3     | -0.471273405 | 8.4704322   | 3.26115E-14 |
| ALDH5A1   | 0.651831909  | 8.407852616 | 3.34318E-14 |
| LAT2      | -0.195509256 | 6.198100956 | 3.41562E-14 |
| BCAT1     | -0.466876285 | 6.353946569 | 3.42132E-14 |
| MAP2K3    | -0.502275735 | 6.893563625 | 3.51344E-14 |
| KDEL2     | -0.522264954 | 8.675093313 | 3.62717E-14 |
| ALDH4A1   | 0.389323877  | 7.76776592  | 3.70142E-14 |
| TGIF1     | -0.303196758 | 6.5066062   | 3.71571E-14 |
| IFNGR1    | -0.469346764 | 10.52171531 | 3.73665E-14 |
| ADD3      | 0.433725779  | 8.653261652 | 3.80829E-14 |
| GADD45A   | 0.746804545  | 10.44911309 | 3.81801E-14 |
| SGCG      | 0.787795206  | 10.07206295 | 3.89632E-14 |
| GJA1      | 0.748921889  | 10.8577887  | 3.9556E-14  |
| RAB5A     | -0.516719958 | 8.220439506 | 4.08703E-14 |
| DPH5      | 0.300642844  | 8.684277851 | 4.10064E-14 |
| PEX1      | 0.387467156  | 7.454270235 | 4.11472E-14 |
| SERTAD3   | -0.260819921 | 7.003554691 | 4.22321E-14 |
| WWC1      | -0.722668501 | 6.197381729 | 4.26736E-14 |
| THAP6     | 0.339148052  | 6.992140045 | 4.33145E-14 |
| B3GNT8    | 0.339350875  | 7.061189069 | 4.39387E-14 |
| ARHGEF19  | -0.286141612 | 6.583289439 | 4.53914E-14 |
| STS-1     | -1.040639768 | 6.886805842 | 4.5743E-14  |
| ZNF248    | 0.390866369  | 7.168421687 | 4.62357E-14 |
| ARMC4     | 0.308531565  | 6.310977639 | 4.64204E-14 |
| TMEM43    | -0.582179881 | 9.732461656 | 4.64711E-14 |
| ADAL      | 0.389393663  | 7.34237258  | 4.74771E-14 |
| MYOZ2     | 0.715833163  | 10.51331378 | 4.78758E-14 |
| MT1G      | -0.681174086 | 6.767657698 | 4.9471E-14  |
| IL17D     | 0.590950398  | 7.768033159 | 5.0677E-14  |
| RGS2      | -0.804874888 | 9.221843188 | 5.07098E-14 |
| LOC492311 | 0.479072242  | 8.892833564 | 5.10562E-14 |
| AKR7A3    | 0.286249745  | 7.761025497 | 5.12799E-14 |

## DEG.infomation

|           |              |             |             |
|-----------|--------------|-------------|-------------|
| LRFN3     | -0.380954339 | 7.898261334 | 5.52447E-14 |
| OLFML2A   | 0.687493215  | 9.140369628 | 5.60788E-14 |
| CBR4      | 0.392104003  | 8.753368345 | 5.61719E-14 |
| C20ORF26  | 0.786628816  | 8.598929197 | 5.70228E-14 |
| ID1       | -0.685264884 | 9.033752248 | 5.84843E-14 |
| DNAJC19   | 0.531100989  | 8.531476387 | 5.92225E-14 |
| COL4A3BP  | 0.417509236  | 7.876149207 | 6.00748E-14 |
| KBTD3     | 0.266531527  | 6.927928998 | 6.13208E-14 |
| MFNG      | -0.420881564 | 7.491036128 | 6.1445E-14  |
| ZKSCAN4   | 0.249336371  | 6.990353581 | 6.26598E-14 |
| TNFAIP8L3 | -0.832471082 | 6.75995232  | 6.35574E-14 |
| TCIRG1    | -0.268953239 | 6.707433335 | 6.36591E-14 |
| LONRF2    | 0.271603473  | 6.772593888 | 6.44007E-14 |
| FBXO8     | 0.328128684  | 8.802015564 | 6.48415E-14 |
| ITGA5     | -1.053960692 | 8.78861633  | 6.52053E-14 |
| ST3GAL2   | -0.300533372 | 6.617692836 | 6.61678E-14 |
| LIX1L     | -0.357751344 | 7.940927946 | 6.65172E-14 |
| MN1       | 0.44827806   | 7.694644488 | 6.71665E-14 |
| HYI       | 0.333417203  | 6.834505032 | 6.7394E-14  |
| PTRH2     | -0.311174294 | 7.650393138 | 7.04222E-14 |
| RNF103    | 0.556278967  | 10.73052983 | 7.04654E-14 |
| ANKRD13A  | -0.817699235 | 8.857674137 | 7.07975E-14 |
| SPATA7    | 0.279650964  | 7.104332969 | 7.44404E-14 |
| CTNNA3    | 0.305950626  | 6.743437971 | 7.54601E-14 |
| KANK1     | 0.444934119  | 8.914765358 | 7.58468E-14 |
| TNPO1     | -0.282352392 | 7.510440588 | 7.81206E-14 |
| LOC401431 | 0.311074019  | 6.830425108 | 7.97777E-14 |
| U1SNRNPBP | -0.366568457 | 7.624892316 | 7.98113E-14 |
| C10ORF11  | -0.416426374 | 6.668134122 | 8.00202E-14 |
| CDC37     | -0.313306371 | 12.47860484 | 8.45457E-14 |
| ST13      | 0.382296777  | 10.09443508 | 8.58296E-14 |
| SLC25A43  | -0.380437563 | 7.037356191 | 8.61494E-14 |
| ALPL      | -0.649066159 | 8.456244723 | 8.76454E-14 |
| JMJD1C    | 0.29831129   | 8.050550098 | 8.78081E-14 |
| BAZ2B     | 0.422710119  | 9.047533729 | 9.11676E-14 |
| SNAPC5    | 0.425055721  | 7.660398029 | 9.2121E-14  |
| THAP9     | 0.273595758  | 6.374458807 | 9.35645E-14 |
| PEMT      | -0.26196247  | 7.32167107  | 9.42186E-14 |
| ANPEP     | -0.482266066 | 6.383035579 | 9.69995E-14 |
| NCDN      | 0.241178994  | 6.778493634 | 9.7404E-14  |
| PMS2L5    | 0.30033645   | 7.400026895 | 9.83009E-14 |
| TPM3      | 1.306328046  | 8.288219449 | 9.91105E-14 |
| WDSUB1    | 0.493513816  | 8.467574009 | 1.00251E-13 |
| SCO1      | 0.420646859  | 10.45039886 | 1.06882E-13 |
| DAND5     | 0.514521962  | 7.444269144 | 1.08438E-13 |
| DBC1      | 0.787263459  | 6.872628568 | 1.08673E-13 |
| WBP1      | 0.319890288  | 7.995162965 | 1.09607E-13 |
| RGS11     | 0.48931277   | 7.641606972 | 1.09936E-13 |
| PARP2     | 0.2471326    | 7.656576831 | 1.14232E-13 |
| BHLHB9    | 0.312358931  | 7.184449131 | 1.16998E-13 |
| ECOP      | -0.262745183 | 6.594745709 | 1.17595E-13 |

## DEG.infomation

|          |              |             |             |
|----------|--------------|-------------|-------------|
| AZIN1    | 0.560390743  | 9.240539936 | 1.18908E-13 |
| LRWD1    | -0.317180712 | 7.449592468 | 1.19325E-13 |
| RABGGTB  | 0.306450554  | 9.9894153   | 1.21247E-13 |
| XBP1     | -0.598571246 | 10.12297368 | 1.22094E-13 |
| TRIM5    | -0.262930511 | 6.691980418 | 1.25259E-13 |
| MRFAP1L1 | 0.243837845  | 9.083211681 | 1.27125E-13 |
| AP1B1    | -0.305186106 | 7.472879082 | 1.27632E-13 |
| CCPG1    | 0.451832896  | 9.478826434 | 1.27916E-13 |
| PGA5     | -0.263585224 | 6.051596436 | 1.28411E-13 |
| EDEM2    | -0.402557318 | 7.46884403  | 1.2983E-13  |
| PTDSS1   | -0.806505606 | 10.01270264 | 1.33274E-13 |
| PQBP1    | -0.279772898 | 7.224271373 | 1.34207E-13 |
| ZDHC5    | -0.284239908 | 8.095641244 | 1.3524E-13  |
| CLK4     | 0.392572106  | 7.438836846 | 1.37693E-13 |
| RANBP10  | 0.321772336  | 7.562008869 | 1.37712E-13 |
| ARHGEF6  | 0.57681945   | 11.06755743 | 1.38929E-13 |
| SMARCD3  | 0.392953715  | 8.653127731 | 1.38955E-13 |
| FAM131A  | -0.320814932 | 8.27632342  | 1.39537E-13 |
| SETMAR   | 0.396875619  | 8.803242778 | 1.39641E-13 |
| PICALM   | -0.720497811 | 8.014656997 | 1.41399E-13 |
| G6PD     | -0.34089879  | 6.636357966 | 1.41627E-13 |
| C9ORF114 | -0.367820335 | 7.612278847 | 1.43506E-13 |
| THSD4    | 0.381460149  | 7.176908633 | 1.44602E-13 |
| RNF214   | 0.214356725  | 7.020369687 | 1.46338E-13 |
| DAGLB    | -0.507502557 | 7.705502284 | 1.51115E-13 |
| TMEM150  | -0.333405039 | 8.156586496 | 1.53436E-13 |
| SOX15    | 0.641484519  | 7.40838528  | 1.53581E-13 |
| RUNX1T1  | 0.208737876  | 6.569105811 | 1.62142E-13 |
| CBR3     | 0.480101112  | 7.216476121 | 1.63706E-13 |
| KIAA0040 | -0.265010955 | 6.583665022 | 1.6794E-13  |
| FLJ10986 | 0.518566129  | 9.140835274 | 1.68229E-13 |
| SIGLEC10 | -0.557485822 | 6.183071346 | 1.70932E-13 |
| TTC14    | 0.368188737  | 7.751906563 | 1.71189E-13 |
| IFIT2    | 0.69094878   | 8.150475366 | 1.74514E-13 |
| IL17RB   | -0.253080263 | 6.064877478 | 1.76449E-13 |
| RGS6     | 0.318329973  | 6.852904943 | 1.76817E-13 |
| ZNF407   | 0.296720046  | 7.611310141 | 1.78948E-13 |
| ZSCAN5A  | -0.287318735 | 6.718354502 | 1.81092E-13 |
| TBC1D8   | 0.436397932  | 8.552265002 | 1.81969E-13 |
| RIPK2    | -0.422675208 | 7.64878304  | 1.84853E-13 |
| CRIP1    | 0.500484609  | 9.293746507 | 1.86005E-13 |
| KCNE1    | 0.513553655  | 6.5838864   | 1.87689E-13 |
| LOC63920 | 0.329887555  | 7.076847298 | 1.93695E-13 |
| C9ORF119 | 0.413694034  | 8.468976335 | 1.94791E-13 |
| IL7R     | -0.254377429 | 6.225812501 | 1.96448E-13 |
| FAM152B  | -0.380919353 | 8.935188573 | 1.96804E-13 |
| C19ORF22 | -0.439452456 | 8.639082988 | 1.9774E-13  |
| PIK3R1   | 0.530802641  | 8.626717827 | 2.00488E-13 |
| NAAA     | 0.281703652  | 7.282634113 | 2.01807E-13 |
| STOM     | -0.456167154 | 10.18829539 | 2.03381E-13 |
| GTF2F2   | 0.309827591  | 10.36415867 | 2.03748E-13 |

## DEG.infomation

|           |              |             |             |
|-----------|--------------|-------------|-------------|
| ELA2      | -0.276680882 | 6.151353413 | 2.07999E-13 |
| ZNF323    | 0.356784739  | 7.195311334 | 2.12966E-13 |
| AGBL5     | 0.306155352  | 7.185389236 | 2.1326E-13  |
| UPF2      | 0.228790304  | 8.540071233 | 2.26126E-13 |
| C3ORF23   | 0.232036136  | 6.75203756  | 2.29215E-13 |
| WDFY2     | -0.259817888 | 6.842719977 | 2.30831E-13 |
| KIAA0831  | 0.519793632  | 8.587712088 | 2.32327E-13 |
| C20ORF177 | 0.592611622  | 9.364086734 | 2.34049E-13 |
| TUFT1     | 0.463649728  | 7.514073764 | 2.35313E-13 |
| SH3GL2    | 0.992589821  | 8.710811027 | 2.37901E-13 |
| SLC25A18  | -0.361656895 | 6.437245615 | 2.41402E-13 |
| HSPA6     | -0.939502097 | 6.962799309 | 2.42448E-13 |
| SERPINB8  | -0.521963614 | 6.40689679  | 2.43004E-13 |
| ATP1B3    | -0.617943596 | 8.782647047 | 2.43238E-13 |
| PCBD1     | 0.348868037  | 9.509568523 | 2.49516E-13 |
| PGBD4     | 0.166335033  | 6.453775571 | 2.50127E-13 |
| VSTM2L    | -0.518501155 | 6.46333812  | 2.58644E-13 |
| TUBB2A    | -0.477349008 | 6.708781087 | 2.6758E-13  |
| KIAA1383  | 0.278628625  | 6.73360754  | 2.73964E-13 |
| PLP2      | -0.454236932 | 6.990683481 | 2.74429E-13 |
| C10ORF26  | -0.343934602 | 7.612391402 | 2.76178E-13 |
| SERPINB1  | -0.628963054 | 8.132001348 | 2.88267E-13 |
| SNX1      | 0.290909115  | 7.463897115 | 2.95581E-13 |
| SFRS9     | -0.356854969 | 9.561157288 | 2.95724E-13 |
| IAH1      | 0.441044141  | 10.35467672 | 2.97742E-13 |
| WDR4      | -0.322701684 | 7.02560875  | 2.98253E-13 |
| TEX12     | 0.306688564  | 6.428185771 | 3.02429E-13 |
| FOS       | -1.436188744 | 7.422432308 | 3.0853E-13  |
| PILRA     | -0.188473744 | 6.423902316 | 3.11066E-13 |
| CNKSR3    | 0.468078769  | 9.413999096 | 3.12325E-13 |
| ATM       | 0.329189404  | 7.478456987 | 3.12848E-13 |
| SPATA2L   | -0.391336761 | 6.896818695 | 3.13801E-13 |
| GAS2      | 0.332091197  | 6.818800134 | 3.15307E-13 |
| ZNF598    | -0.339984461 | 7.721031881 | 3.19711E-13 |
| AK3L1     | 0.338625511  | 8.332849834 | 3.41293E-13 |
| NUDT4     | -0.177485587 | 6.191100197 | 3.41659E-13 |
| ZFP3      | 0.319043735  | 7.682344192 | 3.42098E-13 |
| FAM129A   | 0.648064839  | 11.40336356 | 3.4234E-13  |
| TMEM30B   | 0.613945458  | 6.750468706 | 3.43596E-13 |
| AKR7A2    | 0.332439213  | 10.52420791 | 3.453E-13   |
| ENAM      | 0.488114272  | 7.058714451 | 3.48924E-13 |
| ALDH1A3   | -0.748272859 | 6.813119162 | 3.50134E-13 |
| FUNDC1    | 0.438652607  | 8.723392433 | 3.50947E-13 |
| ZMYND11   | 0.301669467  | 9.804606991 | 3.53965E-13 |
| DHX40     | 0.23294802   | 7.235753375 | 3.54583E-13 |
| VGLL4     | 0.351568619  | 9.618025672 | 3.5535E-13  |
| RYR2      | 0.873003299  | 11.5751854  | 3.67092E-13 |
| HSPB7     | -0.457897353 | 13.3895532  | 3.69858E-13 |
| AMPH      | 0.413178931  | 7.163577474 | 4.03714E-13 |
| LOC541471 | 0.309974894  | 6.392425632 | 4.13654E-13 |
| ITGA3     | -0.420037655 | 7.648761178 | 4.17743E-13 |

## DEG.infomation

|           |              |             |             |
|-----------|--------------|-------------|-------------|
| C7ORF53   | 0.514620762  | 7.21411185  | 4.24817E-13 |
| PAPD4     | 0.355998687  | 8.740183592 | 4.30557E-13 |
| LOC88523  | 0.411872937  | 10.72531984 | 4.35561E-13 |
| NP        | -0.731353207 | 7.145353999 | 4.45969E-13 |
| KIAA1712  | 0.310684943  | 7.99610118  | 4.61093E-13 |
| GJA4      | -0.457693371 | 8.291162717 | 4.68814E-13 |
| C1ORF175  | 0.530719102  | 7.142038072 | 4.70354E-13 |
| FNDC1     | 0.757184777  | 7.710921286 | 4.75992E-13 |
| SRPRB     | -0.479343702 | 9.463488911 | 4.78084E-13 |
| CNTNAP1   | -0.480508487 | 6.949567506 | 4.83269E-13 |
| DOK5      | 0.455064473  | 6.871934111 | 5.04174E-13 |
| TXLNA     | -0.36827012  | 9.283843204 | 5.05749E-13 |
| TOB2      | -0.339059605 | 7.191077799 | 5.10696E-13 |
| PKD2      | 0.307784645  | 7.805732082 | 5.11753E-13 |
| LPCAT1    | -0.391028749 | 6.817493745 | 5.19474E-13 |
| KLHDC6    | 0.555842761  | 9.049444752 | 5.22223E-13 |
| NDEL1     | -0.32748811  | 9.192463317 | 5.22415E-13 |
| C11ORF1   | 0.411703363  | 8.087401897 | 5.26872E-13 |
| FNIP1     | 0.351709548  | 7.737667891 | 5.42933E-13 |
| CAMK2B    | 0.403332325  | 9.390579616 | 5.48343E-13 |
| MSX1      | -0.585992    | 8.141172222 | 5.64856E-13 |
| LONRF1    | -0.361737634 | 7.122286396 | 5.67541E-13 |
| C4ORF18   | 0.425588971  | 9.341746277 | 5.77367E-13 |
| ZZZ3      | 0.31449361   | 8.541194002 | 5.78592E-13 |
| LOC390975 | -0.279861032 | 6.393709456 | 5.79325E-13 |
| ZNF706    | 0.263196064  | 7.559235855 | 5.81814E-13 |
| LCN12     | 0.327414187  | 6.482028551 | 6.07204E-13 |
| RARB      | 0.268843755  | 7.068488834 | 6.076E-13   |
| CTSK      | 0.619830742  | 7.761376578 | 6.09558E-13 |
| PRKCB1    | -0.223862838 | 6.151853956 | 6.1321E-13  |
| KLF2      | -0.643351776 | 11.2926599  | 6.23364E-13 |
| ERCC5     | 0.322209865  | 8.770126713 | 6.44984E-13 |
| COX15     | 0.300067723  | 7.606665516 | 6.5335E-13  |
| MKRN2     | 0.433682047  | 9.811140586 | 6.75888E-13 |
| BYSL      | -0.459422656 | 7.593662378 | 6.82255E-13 |
| COL6A3    | -0.696795722 | 10.18444755 | 6.99805E-13 |
| STXBP6    | -0.699845706 | 7.974673253 | 7.00915E-13 |
| GPR22     | 0.596341234  | 7.889432436 | 7.02758E-13 |
| GGH       | -0.289474996 | 6.451540641 | 7.18588E-13 |
| ZNF544    | 0.269232879  | 8.132606189 | 7.18647E-13 |
| ATP2C1    | 0.303196051  | 8.059730502 | 7.44184E-13 |
| CHST13    | -0.288657526 | 6.402190044 | 7.54436E-13 |
| WDR46     | -0.455505813 | 7.749740738 | 7.64753E-13 |
| BST2      | -0.748710886 | 8.226700304 | 7.74225E-13 |
| TCF21     | -0.561782231 | 7.218721842 | 7.99188E-13 |
| NDFIP1    | 0.307692467  | 7.963765818 | 8.10273E-13 |
| RBPJ      | -0.208745309 | 6.668034749 | 8.11021E-13 |
| ARHGEF12  | 0.318045107  | 7.843510564 | 8.40261E-13 |
| LOC644760 | 0.594914511  | 8.008989782 | 8.49493E-13 |
| GPR137C   | 0.258282674  | 6.64460843  | 8.63528E-13 |
| PFDN1     | 0.358190456  | 9.354285042 | 8.74785E-13 |



## DEG.infomation

|           |              |             |             |
|-----------|--------------|-------------|-------------|
| SCAP      | -0.353308962 | 9.169167461 | 8.82712E-13 |
| C1ORF63   | 0.399062117  | 7.84823215  | 8.83275E-13 |
| CASQ1     | 0.874748517  | 8.686830805 | 8.86561E-13 |
| LIN7B     | 0.566830276  | 8.627248621 | 9.25071E-13 |
| SLC1A7    | 0.474602647  | 6.561659288 | 9.39011E-13 |
| RNF165    | 0.59635635   | 7.44997661  | 9.40761E-13 |
| CYFIP1    | -0.253551037 | 7.264133037 | 9.41469E-13 |
| RBM24     | 0.505073106  | 9.850065261 | 9.5205E-13  |
| MGEA5     | 0.387658585  | 11.2551719  | 9.53478E-13 |
| OSCAR     | -0.200836881 | 6.554964472 | 9.58839E-13 |
| UBXN2A    | -0.396877179 | 8.440895437 | 9.68637E-13 |
| TM9SF1    | -0.217935722 | 6.880974618 | 9.75976E-13 |
| FAM59A    | -0.337750063 | 6.715941756 | 1.00412E-12 |
| PGBD3     | 0.242194783  | 6.562403018 | 1.00559E-12 |
| ELF4      | -0.294434293 | 7.202606928 | 1.04701E-12 |
| ZNF540    | 0.335998741  | 7.025257882 | 1.06575E-12 |
| MPPE1     | 0.421916453  | 8.717322516 | 1.07485E-12 |
| CPNE8     | -0.346370697 | 7.286024839 | 1.07562E-12 |
| GTPBP6    | -0.426780085 | 10.54912631 | 1.0763E-12  |
| KIAA0922  | 0.387367347  | 7.850401876 | 1.078E-12   |
| TIMM44    | -0.35168941  | 8.156950129 | 1.07831E-12 |
| PROK2     | -0.289220895 | 6.108276693 | 1.10029E-12 |
| CDK2      | -0.286747151 | 7.959895709 | 1.11383E-12 |
| CA3       | 1.362298452  | 7.223133583 | 1.12195E-12 |
| CENPB     | -0.319252376 | 10.86163897 | 1.14504E-12 |
| TMEM49    | -0.459195959 | 9.002170444 | 1.19194E-12 |
| TMEM167B  | 0.333919458  | 8.846744991 | 1.19829E-12 |
| FBXL22    | 0.370960842  | 6.564361709 | 1.20258E-12 |
| ANKRD46   | 0.410057936  | 8.932038735 | 1.24399E-12 |
| MSRB3     | 0.382383424  | 9.624476968 | 1.2571E-12  |
| BAZ1A     | -0.356531239 | 6.84475174  | 1.302E-12   |
| GLT25D1   | -0.455621651 | 8.899000681 | 1.38672E-12 |
| C12ORF39  | 0.41851675   | 7.148774261 | 1.38923E-12 |
| IFITM1    | -0.669740207 | 10.4345323  | 1.40306E-12 |
| PDK3      | 0.288380439  | 6.991347237 | 1.42624E-12 |
| MYO9B     | -0.295178306 | 7.286420927 | 1.43585E-12 |
| NUP62     | -0.278419066 | 9.134584815 | 1.44325E-12 |
| KCNAB1    | 0.272727301  | 6.883111451 | 1.47719E-12 |
| B4GALT3   | -0.33401181  | 8.719190779 | 1.49415E-12 |
| TMEM144   | 0.494959914  | 7.925602726 | 1.50194E-12 |
| SLC25A44  | -0.282272401 | 8.884157603 | 1.55525E-12 |
| ZBTB47    | 0.549085852  | 9.298744909 | 1.63506E-12 |
| GNL1      | -0.291610691 | 7.62208768  | 1.66734E-12 |
| SEC15L2   | 0.148572542  | 6.299298798 | 1.66961E-12 |
| TNFRSF6B  | -0.279185718 | 6.432171688 | 1.68473E-12 |
| PFKFB3    | -0.387975463 | 8.010246436 | 1.68817E-12 |
| LOC440589 | -0.440077525 | 13.26915102 | 1.70444E-12 |
| ANXA2     | -0.6756556   | 9.95694366  | 1.7252E-12  |
| CMBL      | 0.624459815  | 9.548612093 | 1.72729E-12 |
| LOC651380 | 0.379479902  | 6.989393218 | 1.73998E-12 |
| LOC391692 | -0.326763067 | 6.65317272  | 1.74507E-12 |

## DEG.infomation

|           |              |             |             |
|-----------|--------------|-------------|-------------|
| CX3CL1    | -0.540705613 | 8.462774573 | 1.78027E-12 |
| PSIP1     | 0.391831135  | 7.486334588 | 1.78457E-12 |
| IL8       | -0.741904287 | 6.478884079 | 1.81684E-12 |
| VPS13A    | 0.355731464  | 7.318321525 | 1.84041E-12 |
| WDR70     | -0.353697202 | 7.635052183 | 1.86842E-12 |
| CDKN1A    | -1.094740062 | 8.144431354 | 1.86876E-12 |
| GRIA3     | 0.251539119  | 6.401912382 | 1.94196E-12 |
| HDAC5     | 0.195826339  | 6.501748836 | 1.94329E-12 |
| HSF1      | 0.428764858  | 6.973424482 | 1.94387E-12 |
| FBXO3     | 0.373755517  | 8.023534573 | 1.9681E-12  |
| ELF1      | -0.356610094 | 9.061931079 | 1.99817E-12 |
| LOC196549 | 0.742949799  | 8.129297782 | 2.00273E-12 |
| QSOX1     | -0.455538602 | 7.497295829 | 2.04196E-12 |
| FLJ10781  | 0.581374131  | 7.162370935 | 2.04651E-12 |
| PLEKHH2   | 0.417912557  | 6.663505368 | 2.09782E-12 |
| SIPA1     | -0.34357839  | 7.825546861 | 2.10665E-12 |
| C1QA      | -0.481586194 | 6.842562838 | 2.13974E-12 |
| IRAK1     | -0.517505874 | 8.248827817 | 2.14411E-12 |
| CTSS      | -0.279660445 | 6.346305818 | 2.15159E-12 |
| C14ORF45  | 0.231107525  | 6.731454243 | 2.15286E-12 |
| OSTF1     | -0.395368949 | 8.58583546  | 2.16532E-12 |
| DUT       | 0.274284563  | 7.658736898 | 2.1768E-12  |
| LOC648500 | 0.328507622  | 6.701124464 | 2.1783E-12  |
| MID1IP1   | -0.551821487 | 7.908065836 | 2.23146E-12 |
| KAL1      | 0.457253396  | 7.554770656 | 2.31278E-12 |
| ZFP106    | 0.398048268  | 12.5624918  | 2.34272E-12 |
| TFE3      | -0.278344697 | 6.691598856 | 2.35355E-12 |
| FAM20C    | -0.225546567 | 7.025737402 | 2.39223E-12 |
| NFKB2     | -0.213615507 | 6.478862326 | 2.42102E-12 |
| LEPREL2   | 0.443013743  | 7.462595922 | 2.61959E-12 |
| TRAK1     | 0.321450971  | 7.973290122 | 2.66419E-12 |
| CCM2      | -0.344894299 | 8.459535286 | 2.69486E-12 |
| CRISPLD2  | -0.660178551 | 9.123552006 | 2.70476E-12 |
| CYP2U1    | 0.279878086  | 6.754998342 | 2.70852E-12 |
| ANTXR2    | 0.422684325  | 9.411886079 | 2.78199E-12 |
| ACADM     | 0.462234423  | 11.83484409 | 2.80894E-12 |
| PROX1     | 0.67217842   | 8.434822053 | 2.82673E-12 |
| SCD       | -0.951477555 | 7.855180814 | 2.82909E-12 |
| MFAP4     | 0.747117462  | 10.18903797 | 2.84661E-12 |
| KIAA1737  | 0.422489338  | 9.955394696 | 2.86954E-12 |
| NCOA7     | -0.425870272 | 7.877697223 | 2.90483E-12 |
| MAEL      | 0.422065874  | 7.003025818 | 2.94266E-12 |
| PHACTR4   | -0.348937219 | 7.81119586  | 2.95267E-12 |
| OSBPL2    | 0.394953999  | 8.320957973 | 2.99621E-12 |
| IL1RL1    | -0.773520453 | 6.28035773  | 3.01729E-12 |
| SH3D19    | 0.479278288  | 10.06236713 | 3.03822E-12 |
| ZC3H12B   | 0.240950115  | 6.421066175 | 3.07099E-12 |
| ACAD8     | 0.35185175   | 8.34921781  | 3.17412E-12 |
| MTMR10    | 0.353250048  | 7.882159238 | 3.18636E-12 |
| DYNC1LI2  | 0.312634932  | 11.25147323 | 3.20817E-12 |
| POLA2     | -0.285872457 | 7.294665754 | 3.22383E-12 |

## DEG.infomation

|               |              |             |             |
|---------------|--------------|-------------|-------------|
| ATF3          | -0.729194903 | 6.824173878 | 3.25766E-12 |
| ATF7IP2       | 0.356001909  | 7.887678302 | 3.29593E-12 |
| SLC35A2       | -0.198383379 | 7.082027463 | 3.34696E-12 |
| PSMD3         | -0.386438116 | 7.108310955 | 3.34793E-12 |
| FAM13A1       | 0.240997482  | 6.697158423 | 3.36193E-12 |
| SLC30A2       | 0.704347179  | 7.381217831 | 3.45707E-12 |
| CDKN1B        | 0.449071531  | 8.505513721 | 3.46733E-12 |
| PREPL         | 0.410189829  | 8.889018332 | 3.4732E-12  |
| ZNF541        | 0.577865331  | 7.295932211 | 3.55559E-12 |
| C20ORF24      | -0.310865555 | 10.99013303 | 3.63692E-12 |
| KHDRBS3       | -0.396316859 | 8.022910825 | 3.65685E-12 |
| GOLSYN        | -0.333934929 | 6.578237277 | 3.65915E-12 |
| DKFZP564O0823 | 0.624406989  | 10.76781323 | 3.72113E-12 |
| ZNF763        | 0.299765214  | 6.619169126 | 3.76099E-12 |
| NR2C2AP       | -0.318862336 | 6.873903935 | 3.77022E-12 |
| RABGAP1       | 0.449168898  | 9.736422058 | 3.82548E-12 |
| LIAS          | 0.403713724  | 8.127101483 | 3.8608E-12  |
| LOC285908     | 0.329520561  | 6.841517503 | 3.87562E-12 |
| DARS2         | 0.309808828  | 7.539911756 | 4.02909E-12 |
| NME1          | -0.637158234 | 8.493027949 | 4.05169E-12 |
| ACTG1         | -0.566040363 | 11.89831485 | 4.06812E-12 |
| TNIK          | 0.368560266  | 7.415580578 | 4.08273E-12 |
| CTSG          | -0.657468402 | 6.854876723 | 4.1033E-12  |
| PACSIN2       | -0.373399811 | 10.55986502 | 4.11109E-12 |
| C17ORF91      | -0.606904819 | 9.201327289 | 4.14322E-12 |
| SOCS2         | 0.632340892  | 9.136884897 | 4.17941E-12 |
| ABHD11        | 0.310065642  | 7.042514322 | 4.2294E-12  |
| ZNF302        | 0.360539996  | 8.837905718 | 4.25317E-12 |
| SLC9A3R1      | -0.568071546 | 8.011942041 | 4.30298E-12 |
| COPZ2         | 0.395746829  | 7.801057982 | 4.30308E-12 |
| OTUD4         | -0.279747051 | 6.868993863 | 4.34681E-12 |
| UBB           | 0.38118468   | 13.28838855 | 4.41848E-12 |
| IKBKG         | -0.375791951 | 8.70231137  | 4.57074E-12 |
| IRF8          | -0.36191806  | 7.096363652 | 4.58124E-12 |
| ORC5L         | 0.189260859  | 6.996128341 | 4.60656E-12 |
| EPAS1         | -0.416140789 | 11.23850158 | 4.65121E-12 |
| ZCCHC7        | 0.356247328  | 8.096409115 | 4.71334E-12 |
| GPATCH4       | -0.447109475 | 7.287882005 | 4.73949E-12 |
| ALDH6A1       | 0.446190709  | 8.600515694 | 4.84704E-12 |
| NOLA1         | -0.372036187 | 7.982094899 | 4.88054E-12 |
| ORC2L         | 0.290106418  | 8.144231662 | 4.89278E-12 |
| PROCR         | -0.31865745  | 6.79773196  | 4.93668E-12 |
| MARK3         | -0.304583645 | 7.562008403 | 4.966E-12   |
| ORAOV1        | -0.34012484  | 7.502097569 | 5.00263E-12 |
| RAI2          | 0.267742926  | 7.33188003  | 5.09516E-12 |
| NT5C2         | 0.466561454  | 9.522773677 | 5.10189E-12 |
| SLC25A39      | -0.338095554 | 9.68219904  | 5.20271E-12 |
| TARS2         | 0.313863198  | 7.283481145 | 5.27616E-12 |
| ACOX2         | 0.606715788  | 9.686415607 | 5.47482E-12 |
| RBMX2         | 0.16742977   | 7.179912603 | 5.58817E-12 |
| ETV6          | -0.272969312 | 7.547047362 | 5.61158E-12 |

## DEG.infomation

|           |              |             |             |
|-----------|--------------|-------------|-------------|
| MAP4      | 0.682223993  | 8.574691231 | 5.64761E-12 |
| THNSL1    | 0.306818841  | 7.120306185 | 5.94322E-12 |
| NFYC      | 0.330221137  | 8.776025593 | 5.97884E-12 |
| RGS17     | 0.243376449  | 6.506330672 | 5.9974E-12  |
| RNF144B   | -0.409456096 | 7.412215661 | 6.05215E-12 |
| HTR2B     | 0.536228869  | 6.776895295 | 6.23445E-12 |
| ZMYM4     | 0.342724214  | 8.028796795 | 6.24286E-12 |
| CASP4     | -0.222469567 | 6.67686657  | 6.25118E-12 |
| CMTM8     | -0.426133225 | 7.902438104 | 6.40753E-12 |
| DIXDC1    | 0.337860344  | 7.437556898 | 6.42105E-12 |
| CCDC130   | -0.288071693 | 10.2218401  | 6.4896E-12  |
| ADHFE1    | 0.432484079  | 9.712805763 | 6.51249E-12 |
| TCEAL7    | 0.274672306  | 6.63946558  | 6.52629E-12 |
| SURF4     | -0.468623872 | 8.973839517 | 6.56343E-12 |
| CCDC66    | 0.264589438  | 7.171259271 | 6.56732E-12 |
| NSDHL     | -0.441501631 | 8.472983554 | 6.61273E-12 |
| LOC730024 | 0.20368381   | 6.425140358 | 6.66861E-12 |
| CST3      | -0.354436129 | 12.55809658 | 6.75379E-12 |
| NRSN2     | -0.315419329 | 7.422839198 | 6.76027E-12 |
| KLF12     | 0.215576975  | 6.897878151 | 6.94294E-12 |
| ZNF518A   | 0.305558451  | 7.301277681 | 7.06039E-12 |
| ATAD3A    | -0.369736528 | 7.07668396  | 7.15439E-12 |
| GFM2      | 0.34579446   | 7.073687278 | 7.30091E-12 |
| RNF220    | -0.264599789 | 8.602509804 | 7.33742E-12 |
| OPN3      | -0.202649151 | 6.340774173 | 7.38475E-12 |
| GRAP      | -0.136477851 | 6.308870177 | 7.56651E-12 |
| LEAP2     | 0.253757527  | 6.73931601  | 7.61468E-12 |
| PPP3CC    | -0.376996579 | 8.95250812  | 7.96304E-12 |
| CCDC91    | 0.397883547  | 7.86083245  | 7.9839E-12  |
| EPHA3     | 0.245726439  | 6.488043102 | 8.0915E-12  |
| CAPZB     | -0.25784856  | 8.951545134 | 8.12608E-12 |
| SLC6A9    | -0.130129544 | 6.202912734 | 8.58805E-12 |
| LOC203547 | -0.23083313  | 9.1816898   | 8.62894E-12 |
| DPAGT1    | -0.334916167 | 7.616289168 | 8.70194E-12 |
| VAT1L     | 0.623929526  | 7.640321758 | 8.92726E-12 |
| TINF2     | -0.440761091 | 9.141756759 | 8.93494E-12 |
| FBXO31    | 0.397926314  | 9.545588624 | 9.03091E-12 |
| SOX17     | -0.431115593 | 6.94888959  | 9.12684E-12 |
| SHISA5    | -0.378589733 | 9.299888523 | 9.28076E-12 |
| LITAF     | -0.691391324 | 9.477502518 | 9.33911E-12 |
| ARHGEF3   | 0.381809255  | 9.317855539 | 9.35615E-12 |
| CNNM4     | 0.381900434  | 7.155380787 | 9.38433E-12 |
| IGBP1     | 0.346320847  | 8.897995764 | 9.49354E-12 |
| PSCD4     | -0.415567494 | 7.013481783 | 9.52697E-12 |
| ARAF      | -0.278822126 | 9.512647811 | 9.87155E-12 |
| C19ORF54  | 0.280689537  | 7.132129171 | 9.8787E-12  |
| SLC6A1    | 0.266053256  | 6.542670224 | 9.93743E-12 |
| C9ORF61   | 0.439488212  | 8.50095189  | 1.00102E-11 |
| RGS5      | 0.527425568  | 10.62275405 | 1.01004E-11 |
| MTHFD2L   | 0.423018724  | 8.205470188 | 1.02809E-11 |
| HBEGF     | 0.733478452  | 9.814438749 | 1.04534E-11 |

## DEG.infomation

|           |              |             |             |
|-----------|--------------|-------------|-------------|
| SLU7      | 0.343391071  | 8.26375548  | 1.0626E-11  |
| C17ORF85  | 0.23343933   | 7.473762954 | 1.06536E-11 |
| MAFG      | -0.17274372  | 6.802550059 | 1.07178E-11 |
| EVC       | 0.160408498  | 6.479780372 | 1.08357E-11 |
| AQP10     | 0.245515882  | 6.223987197 | 1.08686E-11 |
| NMB       | -0.373952349 | 6.647448362 | 1.10011E-11 |
| SMARCE1   | 0.286620791  | 8.45479183  | 1.11646E-11 |
| FLJ35258  | 0.635304579  | 7.610940078 | 1.11693E-11 |
| TOR1AIP1  | 0.275988399  | 9.318051446 | 1.12436E-11 |
| EBI3      | -0.301899294 | 6.30217536  | 1.13555E-11 |
| C8ORF40   | 0.466690765  | 10.28870883 | 1.13664E-11 |
| CCDC112   | 0.260250473  | 6.974221606 | 1.14715E-11 |
| C6ORF91   | 0.376756913  | 6.690291242 | 1.15863E-11 |
| TSPAN12   | 0.519511283  | 8.172815146 | 1.18016E-11 |
| GLOD4     | 0.287334197  | 8.769155342 | 1.18689E-11 |
| SCAMP2    | -0.298795255 | 6.741369457 | 1.1984E-11  |
| NIP7      | -0.37962563  | 7.898621678 | 1.22393E-11 |
| ACADL     | 0.276631289  | 6.239126316 | 1.26622E-11 |
| ZNF135    | 0.312222926  | 7.222531854 | 1.30313E-11 |
| IL6       | -0.602685835 | 6.431536327 | 1.31526E-11 |
| CORO1B    | -0.277056618 | 7.176992499 | 1.32915E-11 |
| PIAS2     | 0.172007446  | 7.006441866 | 1.33271E-11 |
| ITPKC     | -0.315085446 | 6.594449313 | 1.36429E-11 |
| TCEAL4    | 0.238970877  | 10.15371212 | 1.3669E-11  |
| CMIP      | -0.432750047 | 7.223755833 | 1.3755E-11  |
| ATPAF2    | 0.278197727  | 7.919802285 | 1.37582E-11 |
| LOC121952 | 0.473286298  | 7.097601507 | 1.3833E-11  |
| EIF3B     | -0.362114861 | 10.23889044 | 1.40205E-11 |
| ARV1      | 0.386240628  | 8.992353587 | 1.4226E-11  |
| NHLRC3    | 0.25894939   | 7.35836323  | 1.42898E-11 |
| DNAJC13   | 0.243734521  | 7.975215934 | 1.43653E-11 |
| CLPTM1    | -0.332720525 | 9.461962124 | 1.44391E-11 |
| NAT10     | -0.3242828   | 8.880959265 | 1.45434E-11 |
| UNQ1940   | 0.518466754  | 6.787783528 | 1.45448E-11 |
| ZSCAN18   | 0.438446102  | 10.8621623  | 1.48673E-11 |
| CD300A    | -0.240363393 | 6.25629441  | 1.50486E-11 |
| FAM92A1   | 0.358992593  | 7.886037473 | 1.50683E-11 |
| VGLL2     | 0.502522683  | 6.429378039 | 1.51337E-11 |
| C1ORF165  | 0.283191515  | 6.783872512 | 1.51604E-11 |
| SEPT9     | -0.293757108 | 11.05447111 | 1.53256E-11 |
| TIMP1     | -1.057636209 | 11.7269992  | 1.53281E-11 |
| LOC400963 | -0.400036977 | 13.0099513  | 1.53433E-11 |
| INTS9     | -0.221027215 | 8.704345516 | 1.5879E-11  |
| ARMCX2    | 0.390795879  | 9.660545973 | 1.59742E-11 |
| LCMT1     | 0.205034811  | 9.819108061 | 1.62137E-11 |
| ATP6V1F   | -0.536913607 | 10.49567014 | 1.64144E-11 |
| PRKCH     | -0.522221132 | 8.605017133 | 1.64574E-11 |
| HARS2     | 0.28771987   | 9.719855441 | 1.65952E-11 |
| TSC22D1   | -0.580257223 | 9.543897354 | 1.65996E-11 |
| C1ORF25   | 0.211469456  | 7.267616455 | 1.70534E-11 |
| THUMPD3   | 0.183812273  | 6.87531585  | 1.71679E-11 |

## DEG.infomation

|           |              |             |             |
|-----------|--------------|-------------|-------------|
| TIMELESS  | -0.267102506 | 6.732779222 | 1.7809E-11  |
| RNF126    | -0.277426529 | 8.000029155 | 1.79702E-11 |
| YWHAQ     | 0.372293228  | 12.47102111 | 1.79767E-11 |
| GLT25D2   | 0.348673972  | 7.078475839 | 1.84687E-11 |
| CCL11     | -0.313600748 | 6.266374003 | 1.87792E-11 |
| TRUB1     | 0.386179649  | 6.693744875 | 1.89493E-11 |
| TP53INP2  | 0.513562037  | 10.10344167 | 1.93112E-11 |
| PFDN4     | 0.30087364   | 7.121213825 | 1.93617E-11 |
| TNFAIP3   | -0.30193663  | 6.988927593 | 1.95863E-11 |
| IL18RAP   | -0.270714174 | 6.295127063 | 1.96692E-11 |
| ZNF630    | 0.200635182  | 6.575993933 | 1.96812E-11 |
| MT1F      | -0.533683035 | 7.337827105 | 2.00469E-11 |
| C10ORF35  | 0.405794873  | 7.975447306 | 2.00621E-11 |
| SLC38A10  | -0.179723965 | 6.606533403 | 2.03205E-11 |
| C10ORF125 | -0.289780309 | 6.394358288 | 2.03428E-11 |
| KCNIP2    | -0.277438104 | 6.14302694  | 2.05771E-11 |
| EIF4A2    | 0.3372489    | 12.74923248 | 2.11962E-11 |
| CDC42EP1  | -0.207996017 | 6.596489428 | 2.12862E-11 |
| TTF1      | 0.222778631  | 7.290027615 | 2.13189E-11 |
| TUBB3     | -0.516400415 | 7.011783744 | 2.13357E-11 |
| CAMK1D    | -0.161075293 | 6.145510338 | 2.16349E-11 |
| FCGR1A    | -0.320391055 | 6.210707516 | 2.19916E-11 |
| MAPK7     | -0.143057207 | 6.499778036 | 2.21136E-11 |
| RAB23     | 0.403160016  | 7.836682023 | 2.23331E-11 |
| UAP1      | -0.525199911 | 7.82059622  | 2.24358E-11 |
| ENAH      | 0.265180501  | 7.075752668 | 2.26948E-11 |
| NEK1      | 0.308246191  | 7.766017112 | 2.28689E-11 |
| LOC652458 | 0.321776893  | 6.968994102 | 2.31271E-11 |
| PRIC285   | -0.533377359 | 8.243770149 | 2.31706E-11 |
| PDIA4     | -0.439436851 | 6.658841648 | 2.35371E-11 |
| CSDC2     | -0.54882135  | 10.42422209 | 2.36777E-11 |
| RAB5C     | -0.345759148 | 7.666576363 | 2.39498E-11 |
| FBXL2     | 0.234090801  | 6.523010284 | 2.41136E-11 |
| ANXA5     | -0.596589385 | 10.50722004 | 2.41782E-11 |
| LOC649143 | -0.720276226 | 7.20431858  | 2.43856E-11 |
| TNMD      | 0.543873513  | 6.727085207 | 2.47222E-11 |
| SPNS1     | -0.414954662 | 8.456914815 | 2.47446E-11 |
| CDH19     | -0.430818128 | 7.473001401 | 2.63954E-11 |
| UBE2W     | 0.230842193  | 7.002599147 | 2.66764E-11 |
| TSSC4     | -0.428962722 | 8.181489666 | 2.679E-11   |
| FAM120B   | 0.316674485  | 9.868607981 | 2.68495E-11 |
| MYO1G     | -0.356620763 | 6.47177787  | 2.72126E-11 |
| APP       | 0.808510501  | 9.384388515 | 2.72758E-11 |
| DNTTIP1   | 0.324844733  | 8.692365567 | 2.7569E-11  |
| PPP1R9A   | 0.309751288  | 7.039184986 | 2.7611E-11  |
| LOC199800 | -0.235167362 | 6.451817353 | 2.76633E-11 |
| SPTAN1    | 0.43853074   | 9.717554765 | 2.78569E-11 |
| FBXL6     | -0.189358289 | 6.703385772 | 2.78751E-11 |
| AKR1C4    | -0.490570143 | 7.664045052 | 2.812E-11   |
| ARHGAP1   | 0.409415437  | 10.5484087  | 2.84692E-11 |
| FYB       | -0.237296981 | 6.334185952 | 2.87108E-11 |

## DEG.infomation

|           |              |             |             |
|-----------|--------------|-------------|-------------|
| CCDC86    | -0.522846089 | 7.510527549 | 2.88296E-11 |
| MTMR15    | 0.321807045  | 7.604085146 | 2.89998E-11 |
| CD40      | -0.184419277 | 6.289690988 | 2.9113E-11  |
| HERC5     | 0.553979067  | 8.40148262  | 2.93822E-11 |
| IL1R2     | -0.467473542 | 6.174175418 | 2.97482E-11 |
| CLCC1     | -0.214001991 | 6.574590695 | 2.9788E-11  |
| IFT88     | 0.19418212   | 6.75461453  | 3.06497E-11 |
| CPEB1     | 0.172432372  | 6.196010889 | 3.06905E-11 |
| LOC441408 | 0.478458319  | 8.485961729 | 3.06969E-11 |
| ACOT1     | 0.50587862   | 8.69565516  | 3.0771E-11  |
| BRP44L    | 0.449887522  | 12.72819821 | 3.10102E-11 |
| C11ORF60  | 0.256804607  | 7.603464703 | 3.20971E-11 |
| RECQL     | 0.320647324  | 7.504122284 | 3.2882E-11  |
| C21ORF7   | 1.315687381  | 8.424081811 | 3.30811E-11 |
| C2ORF34   | -0.265274954 | 6.829388832 | 3.32164E-11 |
| MGC40489  | -0.185765791 | 6.452357891 | 3.35327E-11 |
| LIPG      | -0.636297864 | 6.224990203 | 3.45212E-11 |
| ARD1A     | -0.396449134 | 8.52664635  | 3.45382E-11 |
| VIL2      | -0.373542857 | 11.41865322 | 3.48855E-11 |
| BIRC6     | 0.22601175   | 7.397733751 | 3.54112E-11 |
| PSCD1     | -0.328780363 | 9.274269746 | 3.56221E-11 |
| TTLL7     | 0.313762627  | 6.611326448 | 3.58532E-11 |
| PCMTD2    | 0.507679316  | 8.97338438  | 3.6052E-11  |
| DCTN6     | 0.319215951  | 8.882314238 | 3.66094E-11 |
| ZNF653    | -0.321000243 | 7.671947777 | 3.70808E-11 |
| HIST1H2AC | 0.594700563  | 8.216338978 | 3.72222E-11 |
| KIAA1598  | -0.334864758 | 7.236273741 | 3.7242E-11  |
| TNFRSF10B | -0.260926451 | 7.064998262 | 3.72841E-11 |
| NFE2L3    | -0.208969347 | 6.346920741 | 3.75626E-11 |
| ZNF235    | 0.183600323  | 6.598823685 | 3.75677E-11 |
| ARRDC3    | 0.2703069    | 6.74958456  | 3.82801E-11 |
| CLASP1    | 0.332979657  | 9.621636605 | 3.8481E-11  |
| C19ORF24  | -0.360080562 | 7.149137502 | 3.87933E-11 |
| CD37      | -0.217881955 | 6.241808376 | 3.87989E-11 |
| MAEA      | -0.333116368 | 7.518826846 | 3.92579E-11 |
| FLJ20444  | 0.254098856  | 7.04270898  | 3.95213E-11 |
| C9ORF6    | 0.252458542  | 7.768747023 | 4.01808E-11 |
| C10ORF76  | 0.555876923  | 8.602506585 | 4.06884E-11 |
| RCOR2     | 0.455436383  | 7.360567516 | 4.10015E-11 |
| SPIN3     | 0.18508828   | 6.69589576  | 4.13492E-11 |
| KIAA0194  | -0.284855585 | 8.244467964 | 4.16164E-11 |
| SSU72     | -0.319140008 | 11.66953986 | 4.19822E-11 |
| LRRC25    | -0.208485302 | 6.151294381 | 4.20085E-11 |
| RFTN1     | -0.430239111 | 10.19916314 | 4.20698E-11 |
| C7ORF36   | 0.262849897  | 7.746636337 | 4.20735E-11 |
| VPS37B    | -0.348443296 | 7.95773749  | 4.22321E-11 |
| ZNF177    | 0.341563792  | 7.307013863 | 4.22874E-11 |
| LOC285550 | 0.310310451  | 6.987346348 | 4.26735E-11 |
| TMEM100   | -0.4796344   | 7.080919284 | 4.26977E-11 |
| KCNA4     | 0.283517065  | 6.477776071 | 4.39355E-11 |
| LOC649679 | -0.265054602 | 6.513261083 | 4.49734E-11 |

## DEG.infomation

|           |              |             |             |
|-----------|--------------|-------------|-------------|
| BID       | -0.225800602 | 6.724333185 | 4.51298E-11 |
| GNB3      | 0.363707677  | 6.595957108 | 4.5498E-11  |
| GPR116    | -0.405284754 | 10.80859189 | 4.55381E-11 |
| DDR1      | 0.296092175  | 6.91857969  | 4.57868E-11 |
| IQCG      | -0.778136282 | 6.713112295 | 4.60303E-11 |
| PCDHB17   | -0.18746835  | 6.481120471 | 4.62994E-11 |
| TSPAN13   | -0.519496579 | 7.922965089 | 4.65456E-11 |
| TRMT11    | 0.194812576  | 6.846885834 | 4.67092E-11 |
| JUNB      | -0.711922941 | 7.311142579 | 4.72004E-11 |
| LOC91561  | -0.332589436 | 12.89438127 | 4.76431E-11 |
| TXNDC1    | -0.400718123 | 8.389457405 | 4.76516E-11 |
| LOC730273 | 0.267133615  | 6.645146589 | 4.7674E-11  |
| ALS2      | 0.342545492  | 10.09486284 | 4.80635E-11 |
| THYN1     | 0.370725846  | 8.276720985 | 4.81954E-11 |
| PMM2      | -0.42495372  | 7.354907069 | 4.85285E-11 |
| C13ORF33  | -0.551064672 | 6.714246084 | 4.93582E-11 |
| LOC728014 | -0.336199892 | 7.569539679 | 5.00672E-11 |
| IGSF1     | 0.577188888  | 6.832877352 | 5.01105E-11 |
| C6ORF153  | -0.290180016 | 9.429974263 | 5.05037E-11 |
| C1QTNF7   | 0.235144215  | 6.355117824 | 5.07672E-11 |
| MT1E      | -0.617584869 | 9.665542426 | 5.15471E-11 |
| ARHGAP12  | 0.268880749  | 7.072801292 | 5.22373E-11 |
| BCL9      | 0.284906599  | 7.766519877 | 5.29721E-11 |
| AXL       | -0.447156407 | 7.954870938 | 5.30474E-11 |
| MXRA5     | 0.985612124  | 10.30705692 | 5.31509E-11 |
| ZNF233    | 0.283654241  | 6.717426005 | 5.34434E-11 |
| GBGT1     | -0.301390618 | 6.67206182  | 5.37122E-11 |
| PAPSS2    | -0.437112122 | 7.227384761 | 5.40319E-11 |
| THAP10    | 0.402633795  | 7.785979995 | 5.45259E-11 |
| CPEB3     | 0.415699486  | 8.268058988 | 5.51702E-11 |
| RAB24     | 0.226552888  | 7.492025771 | 5.55439E-11 |
| DPP3      | -0.253390163 | 6.581464224 | 5.59647E-11 |
| SLC22A5   | -0.525280035 | 7.655742179 | 5.61486E-11 |
| LY86      | -0.342445846 | 6.696713538 | 5.67413E-11 |
| CORIN     | -1.565963151 | 8.155973961 | 5.73866E-11 |
| C14ORF159 | 0.542392353  | 10.87584945 | 5.75992E-11 |
| ADAM15    | -0.391506802 | 9.323410035 | 5.87058E-11 |
| MYL1      | 0.324694891  | 6.387452741 | 5.87166E-11 |
| DAK       | 0.180906529  | 6.569653664 | 5.91678E-11 |
| RSC1A1    | 0.208717683  | 6.746376087 | 5.93419E-11 |
| PCCB      | 0.388458108  | 11.16854672 | 5.93442E-11 |
| C3ORF54   | 0.405093188  | 7.741325272 | 6.02292E-11 |
| ATP13A1   | -0.338827232 | 7.124662649 | 6.02922E-11 |
| MBIP      | 0.218399027  | 7.206319517 | 6.11625E-11 |
| DHX32     | 0.305104127  | 10.26516859 | 6.18982E-11 |
| IRF6      | 0.675669887  | 7.619448204 | 6.19235E-11 |
| GABRE     | 0.480749754  | 7.523529279 | 6.25898E-11 |
| PTGER2    | -0.225134697 | 6.184135037 | 6.3417E-11  |
| HAPLN1    | 0.505637163  | 6.640359358 | 6.41174E-11 |
| SPG11     | 0.400848584  | 9.184709802 | 6.44141E-11 |
| TRIM33    | 0.267527478  | 8.142527843 | 6.47683E-11 |



## DEG.infomation

|              |              |             |             |
|--------------|--------------|-------------|-------------|
| TPM4         | -0.430919296 | 6.830665236 | 6.54155E-11 |
| SEMA4D       | -0.27633299  | 6.87385047  | 6.55961E-11 |
| EPB49        | 0.340497011  | 7.475805351 | 6.5871E-11  |
| PPP1R1A      | -0.565718387 | 8.211769211 | 6.64704E-11 |
| HAMP         | -1.018311737 | 6.365078952 | 6.66135E-11 |
| LOC201175    | -0.199788314 | 6.296353312 | 6.75818E-11 |
| SLC5A6       | -0.384521526 | 7.40556895  | 6.77739E-11 |
| LYZ          | -0.730492991 | 6.993296621 | 6.80665E-11 |
| SMARCA4      | -0.3170111   | 9.594328856 | 6.81927E-11 |
| SENP5        | 0.33062477   | 7.286399037 | 6.98796E-11 |
| F2RL3        | -0.257479409 | 6.333197464 | 7.14058E-11 |
| KIF5B        | 0.500253746  | 9.159116187 | 7.24101E-11 |
| PSTPIP1      | -0.222013481 | 6.116778602 | 7.29577E-11 |
| RGL1         | 0.352736693  | 10.21036023 | 7.50467E-11 |
| TSPYL1       | 0.307496143  | 9.533057616 | 7.54333E-11 |
| CCL13        | -0.443764317 | 6.489227469 | 7.55583E-11 |
| LOC100008589 | 1.327965284  | 12.35183562 | 7.67139E-11 |
| KLHL36       | -0.337542463 | 7.718792774 | 7.78055E-11 |
| GNB1         | -0.257331394 | 11.15789887 | 7.79445E-11 |
| EDNRB        | -0.322368802 | 6.932526695 | 7.85299E-11 |
| NLGN1        | 0.47655432   | 7.838847583 | 7.85449E-11 |
| SETD8        | -0.249807246 | 7.534183568 | 7.86108E-11 |
| SBK1         | 0.449871112  | 6.984825853 | 8.056E-11   |
| ALG13        | -0.260109925 | 6.99012109  | 8.12439E-11 |
| GPX1         | -0.356553519 | 9.7125607   | 8.23554E-11 |
| PKD1         | 0.45963559   | 8.284265035 | 8.2582E-11  |
| EIF2C2       | -0.521615501 | 8.95358341  | 8.27142E-11 |
| LOC441461    | 0.252483571  | 6.678570895 | 8.38688E-11 |
| TSKU         | -0.45595329  | 7.697708394 | 8.45121E-11 |
| NAPB         | 0.360320016  | 8.207648244 | 8.49831E-11 |
| ARHGEF17     | -0.379534231 | 7.580685798 | 8.51739E-11 |
| RNF146       | 0.356004316  | 7.571810196 | 8.60864E-11 |
| C2ORF33      | 0.311727     | 8.371052403 | 8.62397E-11 |
| C21ORF69     | 0.220743967  | 6.293957091 | 8.62602E-11 |
| NOTCH3       | -0.406737575 | 8.702596711 | 8.6291E-11  |
| SERTAD4      | 0.477597923  | 7.451477253 | 8.63478E-11 |
| ING4         | 0.26978484   | 6.990838081 | 8.64426E-11 |
| FERMT2       | -0.375694761 | 10.92340294 | 8.8101E-11  |
| MPZL1        | -0.301591494 | 7.074954076 | 8.85E-11    |
| CRYZL1       | 0.237053632  | 7.766839297 | 9.07365E-11 |
| SLC26A4      | 0.391755264  | 6.393289789 | 9.08018E-11 |
| ZNF23        | 0.234183666  | 6.939122447 | 9.14902E-11 |
| STK19        | -0.357025539 | 7.982976042 | 9.32865E-11 |
| GFPT1        | 0.369348079  | 8.415967831 | 9.3529E-11  |
| ZNF76        | 0.34400235   | 7.527454858 | 9.53478E-11 |
| MAN2B1       | -0.287867941 | 6.745794438 | 9.65488E-11 |
| FHL3         | -0.361655822 | 7.734481112 | 9.67387E-11 |
| ZNF503       | -0.390909476 | 7.188568164 | 9.72629E-11 |
| LAMA2        | 0.365872921  | 9.53798021  | 9.75505E-11 |
| ERMAP        | 0.18839378   | 6.686099502 | 9.89905E-11 |
| KIAA0460     | 0.304248234  | 6.976210094 | 9.9269E-11  |

## DEG.infomation

|           |              |             |             |
|-----------|--------------|-------------|-------------|
| TMEM79    | 0.264743157  | 7.062821409 | 1.01227E-10 |
| TSC22D3   | -0.532662171 | 8.018269738 | 1.03483E-10 |
| C14ORF139 | -0.281882818 | 6.91223887  | 1.04005E-10 |
| GCOM1     | 0.587714009  | 9.584802919 | 1.06698E-10 |
| KLHL24    | 0.712235002  | 10.49068589 | 1.07065E-10 |
| LPAR4     | 0.225390329  | 6.703779026 | 1.07255E-10 |
| PDCD6IP   | 0.196378559  | 7.636799895 | 1.08489E-10 |
| KIDINS220 | 0.397359596  | 9.296655022 | 1.08625E-10 |
| SDF4      | -0.289311686 | 8.703171791 | 1.09199E-10 |
| C15ORF24  | -0.260285493 | 10.62027045 | 1.09427E-10 |
| SSR1      | -0.346810477 | 9.268413888 | 1.09914E-10 |
| C20ORF127 | -0.53993722  | 8.051353392 | 1.12469E-10 |
| CAP2      | 0.469864996  | 11.7900262  | 1.12786E-10 |
| C2ORF28   | 0.254268215  | 11.05931413 | 1.12811E-10 |
| GPR3      | -0.334318012 | 6.321896979 | 1.14282E-10 |
| TTC8      | 0.214199217  | 6.8887685   | 1.14541E-10 |
| FAM133A   | 0.333936917  | 6.305655916 | 1.14808E-10 |
| GABARAPL2 | 0.351884138  | 11.18517529 | 1.15152E-10 |
| RCCD1     | 0.165888382  | 6.386560213 | 1.15894E-10 |
| C16ORF30  | -0.420955814 | 8.384915834 | 1.16451E-10 |
| TTC37     | 0.440189887  | 8.900645237 | 1.17201E-10 |
| PITPNC1   | -0.330265735 | 6.747954563 | 1.1739E-10  |
| BACH2     | 0.130344554  | 6.30811869  | 1.18351E-10 |
| FBXO21    | 0.318969065  | 9.720467153 | 1.19703E-10 |
| LEF1      | 0.286023537  | 6.459702605 | 1.20795E-10 |
| ATXN3     | 0.20097995   | 7.194504912 | 1.21063E-10 |
| HEXA      | 0.262637685  | 6.732608174 | 1.22677E-10 |
| NIN       | 0.225164534  | 7.152800436 | 1.23422E-10 |
| PDE1C     | 0.445347422  | 8.339596329 | 1.24114E-10 |
| RAB8B     | -0.478158894 | 8.000429766 | 1.26638E-10 |
| PLSCR1    | -0.332120393 | 6.320712975 | 1.26745E-10 |
| FBXO18    | -0.29248507  | 8.90279107  | 1.29007E-10 |
| GLCE      | 0.283270701  | 7.874827764 | 1.29933E-10 |
| RPN2      | -0.510356149 | 7.59371331  | 1.33154E-10 |
| ZNF230    | 0.200885737  | 6.622590061 | 1.33256E-10 |
| RTKN      | -0.17366079  | 7.138651532 | 1.35039E-10 |
| MRPS14    | 0.212261123  | 6.806719923 | 1.36634E-10 |
| EPHB4     | -0.376930943 | 7.808455418 | 1.36735E-10 |
| JAM3      | 0.33711121   | 10.4700262  | 1.38701E-10 |
| SLC25A25  | -0.228727441 | 6.769382596 | 1.41992E-10 |
| RPL29     | -0.563588645 | 6.92278539  | 1.42265E-10 |
| TRIM45    | 0.383463847  | 7.466967607 | 1.43876E-10 |
| PTPN1     | -0.64043883  | 9.612522955 | 1.44429E-10 |
| MMP23A    | 0.543149696  | 8.015325994 | 1.45881E-10 |
| LIME1     | -0.327006514 | 7.093805151 | 1.46014E-10 |
| SDF2L1    | -0.600284191 | 9.530478549 | 1.49667E-10 |
| SPRY1     | -0.416136497 | 9.17117509  | 1.49689E-10 |
| TOB1      | 0.479231917  | 9.392507648 | 1.52467E-10 |
| KIAA2010  | -0.242382395 | 7.742953367 | 1.54381E-10 |
| SLC2A3    | -0.872771436 | 8.756763397 | 1.56468E-10 |
| ATP7B     | 0.207665147  | 6.849050089 | 1.56849E-10 |

## DEG.infomation

|           |              |             |             |
|-----------|--------------|-------------|-------------|
| PDE4DIP   | 0.249556382  | 6.577319148 | 1.56888E-10 |
| TRPC1     | 0.337079536  | 7.982747932 | 1.5778E-10  |
| MYO19     | -0.12925953  | 6.260194195 | 1.58407E-10 |
| PCMTD1    | 0.356734979  | 9.468898914 | 1.59899E-10 |
| PER3      | 0.575989374  | 8.005963976 | 1.61207E-10 |
| C1ORF212  | -0.410811449 | 7.60245094  | 1.61914E-10 |
| HESX1     | 0.195606187  | 6.178108144 | 1.61967E-10 |
| C1ORF183  | -0.177122672 | 6.366780272 | 1.63925E-10 |
| GSTA4     | 0.298686658  | 7.740908979 | 1.65031E-10 |
| TBC1D4    | 0.349747469  | 9.070701762 | 1.66045E-10 |
| ACLY      | -0.321468123 | 8.442460291 | 1.66242E-10 |
| GALM      | 0.293093951  | 7.652677111 | 1.66432E-10 |
| RECK      | 0.260287885  | 7.273464092 | 1.68642E-10 |
| RELB      | -0.280127839 | 6.556102718 | 1.69266E-10 |
| APBA3     | -0.262119454 | 7.940251703 | 1.69615E-10 |
| IRX3      | -0.608374829 | 11.89689993 | 1.71455E-10 |
| ADAM11    | -0.381984639 | 6.299085073 | 1.71508E-10 |
| RASSF7    | -0.316970575 | 7.16531277  | 1.71679E-10 |
| OLFM1     | -0.255289403 | 6.981332483 | 1.72984E-10 |
| POLR3GL   | 0.308619633  | 10.89622214 | 1.73067E-10 |
| NOD2      | -0.220913494 | 6.050471568 | 1.73411E-10 |
| KRIT1     | 0.235442939  | 7.454599057 | 1.73584E-10 |
| PUS7      | -0.376983341 | 7.479784162 | 1.77294E-10 |
| ADC       | 0.276296972  | 6.628062534 | 1.77939E-10 |
| LEPROTL1  | 0.332566956  | 9.82091905  | 1.7894E-10  |
| JOSD1     | -0.373740591 | 7.570328621 | 1.79915E-10 |
| C10ORF33  | 0.464620779  | 7.704749248 | 1.85675E-10 |
| UBL7      | 0.208218087  | 7.662402857 | 1.88461E-10 |
| RWDD2A    | 0.278634556  | 7.996952416 | 1.88595E-10 |
| ACADSB    | 0.398414148  | 7.264317725 | 1.9956E-10  |
| FAM58A    | -0.305499945 | 9.029892213 | 2.0072E-10  |
| SND1      | -0.350677307 | 8.88769639  | 2.01697E-10 |
| HERC6     | 0.546208405  | 8.556019182 | 2.01756E-10 |
| LOC728037 | 0.52529231   | 8.258677668 | 2.11682E-10 |
| ATP1B1    | -0.333355753 | 11.12188322 | 2.15739E-10 |
| LOC652097 | 1.059502107  | 9.390681396 | 2.16634E-10 |
| LOC644739 | -0.209729343 | 6.652599798 | 2.22948E-10 |
| LOH3CR2A  | -0.50372202  | 6.485097286 | 2.23782E-10 |
| KCTD18    | 0.268801338  | 7.09810488  | 2.32032E-10 |
| LOC653186 | -0.253545576 | 6.281773272 | 2.33974E-10 |
| GRAMD1A   | -0.438482133 | 7.949375786 | 2.34965E-10 |
| MYO5A     | -0.35069992  | 7.029185258 | 2.35099E-10 |
| DPY19L4   | 0.311657979  | 8.089555809 | 2.35951E-10 |
| ABCF2     | -0.241767323 | 7.169876301 | 2.3873E-10  |
| LMO7      | 0.397393818  | 8.336377345 | 2.41051E-10 |
| TCF25     | -0.276215381 | 9.957581652 | 2.46652E-10 |
| DNAJB12   | -0.144280465 | 6.983166902 | 2.50506E-10 |
| DOCK11    | -0.289283979 | 6.998118978 | 2.50674E-10 |
| C3ORF52   | -0.686357189 | 6.828114529 | 2.51821E-10 |
| AGAP3     | -0.221011794 | 6.974369981 | 2.55408E-10 |
| FDFT1     | 0.258715747  | 10.23554093 | 2.56839E-10 |

## DEG.infomation

|          |              |             |             |
|----------|--------------|-------------|-------------|
| POLR2G   | 0.297977843  | 9.701201074 | 2.56866E-10 |
| C4ORF38  | 0.209462192  | 6.651294713 | 2.57883E-10 |
| P2RY2    | -0.242863472 | 6.616593763 | 2.59738E-10 |
| WEE1     | 0.448095158  | 9.611504623 | 2.61226E-10 |
| BEX1     | 0.762793733  | 8.520845003 | 2.62474E-10 |
| MRPL35   | 0.320004056  | 9.664075843 | 2.62934E-10 |
| UGCG     | -0.393788554 | 7.313850026 | 2.63737E-10 |
| ZNF654   | 0.172910404  | 6.530381388 | 2.65109E-10 |
| MPP6     | -0.209888042 | 6.212614415 | 2.67161E-10 |
| PTN      | 0.287972155  | 8.594787246 | 2.69477E-10 |
| HACL1    | 0.269861145  | 9.192578416 | 2.69605E-10 |
| C4ORF29  | 0.480624688  | 7.651959885 | 2.70028E-10 |
| GPATCH1  | 0.216259097  | 7.257625986 | 2.70128E-10 |
| PXDNL    | 0.593876724  | 8.120388526 | 2.70786E-10 |
| ACTN2    | 0.342691938  | 11.74488596 | 2.73841E-10 |
| ZNF366   | -0.316463107 | 6.759510881 | 2.79749E-10 |
| FAM38A   | -0.439090296 | 8.23713562  | 2.82827E-10 |
| BIVM     | 0.318436573  | 8.898644592 | 2.85856E-10 |
| EXOC2    | 0.230797756  | 7.470146836 | 2.86662E-10 |
| SEMA6B   | -0.151536627 | 6.479850031 | 2.90633E-10 |
| MURC     | 0.523748953  | 9.829534297 | 2.91193E-10 |
| ANK2     | 0.35966093   | 7.817881014 | 2.94411E-10 |
| DET1     | 0.227228853  | 7.790882289 | 2.94707E-10 |
| CBX3     | 0.22943249   | 7.604199933 | 2.95709E-10 |
| IKIP     | -0.232642002 | 6.369169973 | 2.97116E-10 |
| DOCK8    | -0.209623897 | 6.336902723 | 2.97516E-10 |
| NUP37    | 0.281471385  | 9.486772202 | 2.98552E-10 |
| ZNF626   | 0.17976989   | 6.911870037 | 3.00298E-10 |
| GRK5     | -0.441994062 | 8.045624526 | 3.00481E-10 |
| AP2S1    | -0.257703544 | 11.48379361 | 3.03638E-10 |
| LARP5    | 0.379299525  | 9.693985876 | 3.08297E-10 |
| EFHD2    | -0.36041338  | 9.270799966 | 3.09815E-10 |
| RASD2    | -0.359912123 | 7.396185866 | 3.11445E-10 |
| LYRM2    | 0.431191234  | 9.317486053 | 3.13595E-10 |
| RFX5     | 0.250245716  | 7.669858365 | 3.14139E-10 |
| CHI3L2   | -0.224145726 | 6.164317093 | 3.15374E-10 |
| DDX39    | -0.419159533 | 8.556223984 | 3.15645E-10 |
| SLC35A1  | 0.265537113  | 8.918061546 | 3.21521E-10 |
| OSGEPL1  | 0.28590895   | 7.045455921 | 3.31173E-10 |
| ARHGEF9  | 0.330679056  | 6.839543775 | 3.32058E-10 |
| VPS16    | -0.205812231 | 7.614243354 | 3.32285E-10 |
| ANKRD6   | 0.295511161  | 7.408479323 | 3.36675E-10 |
| DOCK1    | 0.264436264  | 7.640630708 | 3.36757E-10 |
| SEC61B   | -0.346560369 | 10.59239115 | 3.36786E-10 |
| AFF3     | 0.259164496  | 6.741042346 | 3.36816E-10 |
| MRT04    | -0.415222176 | 7.394496167 | 3.41127E-10 |
| RABGAP1L | 0.68226153   | 8.227766981 | 3.41332E-10 |
| EIF4EBP3 | 0.384959554  | 6.804322955 | 3.42367E-10 |
| ABCG2    | 0.196634407  | 6.147843353 | 3.45301E-10 |
| QPCT     | 0.360791859  | 7.186682195 | 3.492E-10   |
| GEMIN8   | 0.194360491  | 7.058917513 | 3.49363E-10 |

## DEG.infomation

|           |              |             |             |
|-----------|--------------|-------------|-------------|
| POLR1C    | -0.299624454 | 7.904905937 | 3.49466E-10 |
| AFMID     | 0.320118273  | 7.173560442 | 3.49869E-10 |
| NCAM2     | -0.268315564 | 6.423694393 | 3.50091E-10 |
| FANCL     | 0.17828921   | 6.780898757 | 3.60117E-10 |
| RARA      | -0.256141701 | 6.883153542 | 3.64782E-10 |
| USP54     | -0.22876082  | 6.384402138 | 3.6627E-10  |
| C10RF188  | 0.65236973   | 8.832394438 | 3.66517E-10 |
| RAB6IP1   | 0.264819278  | 11.09899306 | 3.6652E-10  |
| GLT8D2    | 0.371296796  | 7.8248889   | 3.71759E-10 |
| PFAS      | -0.294372696 | 7.439589503 | 3.72481E-10 |
| NDUFA8    | 0.269931283  | 13.1195335  | 3.73687E-10 |
| C19ORF12  | -0.263125803 | 8.457958244 | 3.74293E-10 |
| CAT       | 0.409947691  | 9.364060848 | 3.76068E-10 |
| TXNDC5    | -0.336272122 | 7.787509242 | 3.8253E-10  |
| AMY2A     | 0.331367395  | 7.176696428 | 3.8725E-10  |
| UBAP1     | -0.285368382 | 8.754367367 | 3.89992E-10 |
| TAP2      | -0.280490108 | 6.681711847 | 3.90573E-10 |
| HCCS      | 0.272662692  | 8.445171383 | 3.93372E-10 |
| VDAC3     | 0.318340781  | 12.89867696 | 3.96804E-10 |
| STARD7    | -0.351404667 | 10.53512573 | 3.97927E-10 |
| IL11RA    | 0.391131195  | 9.633891247 | 3.98413E-10 |
| UNG       | -0.380445742 | 7.233899077 | 4.01118E-10 |
| AMHR2     | 0.485171411  | 6.679158655 | 4.02072E-10 |
| UBTD1     | -0.303642884 | 8.303124073 | 4.08243E-10 |
| C10ORF32  | 0.370525395  | 8.898550992 | 4.09975E-10 |
| ESM1      | 0.481377431  | 6.520127617 | 4.12917E-10 |
| PRR6      | -0.535717855 | 8.101641974 | 4.18947E-10 |
| SH3TC1    | -0.307785763 | 6.706174613 | 4.19205E-10 |
| LOC648147 | 0.251842471  | 6.347592961 | 4.21599E-10 |
| SPAG16    | 0.263762373  | 6.823236015 | 4.31214E-10 |
| SNTA1     | 0.399912091  | 10.39748177 | 4.31627E-10 |
| NUDT6     | 0.363939704  | 7.36017766  | 4.32314E-10 |
| ORAI3     | 0.209481253  | 6.495559178 | 4.32734E-10 |
| ZNF337    | 0.305182494  | 7.836843558 | 4.34966E-10 |
| MGC27348  | 0.263893415  | 6.863244337 | 4.45009E-10 |
| TMLHE     | 0.347503173  | 8.375189051 | 4.48473E-10 |
| PELI1     | -0.382429185 | 7.271617656 | 4.5286E-10  |
| RAPH1     | -0.251289482 | 6.798977812 | 4.54843E-10 |
| CXCL16    | -0.356866448 | 7.15013168  | 4.57564E-10 |
| IRF7      | -0.332173508 | 6.863592518 | 4.62566E-10 |
| TMEM165   | -0.424180102 | 6.978510799 | 4.74274E-10 |
| MLH3      | 0.152826351  | 6.60692078  | 4.82628E-10 |
| AZGP1     | -0.660350194 | 7.427974965 | 4.84336E-10 |
| PHYH      | 0.424141286  | 10.68735851 | 4.87642E-10 |
| SPCS2     | -0.323101679 | 9.337089333 | 4.89612E-10 |
| KPNA2     | -0.331111046 | 6.68230939  | 4.9196E-10  |
| PLEKHB2   | -0.317049982 | 7.38821709  | 5.00863E-10 |
| FOLR2     | -0.41478324  | 7.01205962  | 5.01E-10    |
| SFRS2IP   | 0.241545708  | 7.342358774 | 5.01623E-10 |
| AOX1      | -0.31353801  | 6.166369749 | 5.04959E-10 |
| ZNF594    | 0.329568758  | 7.361048785 | 5.05776E-10 |

## DEG.infomation

|           |              |             |             |
|-----------|--------------|-------------|-------------|
| CAND2     | 0.483352537  | 9.263813048 | 5.0799E-10  |
| BMP6      | 0.390617262  | 6.833969922 | 5.08708E-10 |
| DIDO1     | 0.138922866  | 6.798670195 | 5.11683E-10 |
| SREBF1    | -0.28405255  | 6.656605192 | 5.11839E-10 |
| FABP5     | -0.461903335 | 8.518083393 | 5.17906E-10 |
| RRP9      | -0.295575627 | 6.228249055 | 5.27973E-10 |
| CHCHD6    | 0.337577116  | 7.773909515 | 5.29618E-10 |
| ENO2      | 0.580371506  | 7.424367326 | 5.29935E-10 |
| VPS13D    | -0.265379032 | 6.849154396 | 5.35475E-10 |
| PRDX1     | -0.267194478 | 11.36688622 | 5.36489E-10 |
| MMP25     | -0.152523753 | 6.229120742 | 5.36645E-10 |
| CCRK      | -0.150138534 | 6.484077427 | 5.38825E-10 |
| AUP1      | -0.255595931 | 7.057693913 | 5.44466E-10 |
| CCRN4L    | -0.280238751 | 6.647593944 | 5.45953E-10 |
| SPC24     | -0.272721007 | 6.839441637 | 5.46082E-10 |
| SULF1     | 0.742652132  | 8.168956379 | 5.50241E-10 |
| SDCCAG3   | -0.269137164 | 7.520556327 | 5.52657E-10 |
| B3GNT2    | 0.333411631  | 7.311735092 | 5.55835E-10 |
| DNAJB6    | 0.259569885  | 10.30796132 | 5.5802E-10  |
| FCGRT     | -0.350377992 | 9.140617523 | 5.61126E-10 |
| APITD1    | 0.207593373  | 7.02772972  | 5.62577E-10 |
| UBE2Q2    | 0.362784708  | 9.598714831 | 5.62796E-10 |
| PPP1R3A   | 0.517174537  | 8.59911925  | 5.65546E-10 |
| HOMER1    | 0.423180557  | 7.707972027 | 5.68674E-10 |
| ACYP1     | 0.277417853  | 7.706338569 | 5.70313E-10 |
| MGST2     | 0.354703928  | 10.99547405 | 5.70616E-10 |
| IL6R      | -0.147951111 | 6.151057622 | 5.71817E-10 |
| MRPS36    | 0.333320409  | 8.514402589 | 5.80398E-10 |
| PMPCB     | 0.304261304  | 10.47108823 | 5.87414E-10 |
| SRI       | 0.205414244  | 7.607612799 | 5.93022E-10 |
| FLJ46082  | -0.191928916 | 6.185061153 | 5.98296E-10 |
| SLAMF8    | -0.342722151 | 6.148426287 | 6.00503E-10 |
| ATXN10    | 0.160400943  | 7.04699083  | 6.09799E-10 |
| CYP39A1   | 0.200187374  | 6.467680814 | 6.17916E-10 |
| APLP2     | 0.345459401  | 8.967096274 | 6.28112E-10 |
| CXORF57   | 0.389705946  | 6.885752551 | 6.34061E-10 |
| RPP40     | -0.379727214 | 8.368447438 | 6.34867E-10 |
| GIT2      | -0.152970122 | 6.550823369 | 6.41427E-10 |
| MGC87042  | -0.341695305 | 6.46839109  | 6.41795E-10 |
| CD44      | -0.673614732 | 8.267690237 | 6.4183E-10  |
| DUSP16    | 0.231960963  | 6.757905805 | 6.52964E-10 |
| KCTD5     | -0.190170136 | 7.978709219 | 6.55896E-10 |
| LOC344595 | 0.23087121   | 6.831039306 | 6.64852E-10 |
| CYR61     | -0.927353692 | 8.739183348 | 6.80161E-10 |
| LOC201229 | 0.204038093  | 6.592088079 | 6.84076E-10 |
| BASP1     | -0.471767319 | 7.378746704 | 6.89891E-10 |
| SLC25A19  | -0.357076993 | 7.390050054 | 6.92096E-10 |
| NPC1      | -0.367862808 | 7.700015912 | 6.93313E-10 |
| FAR2      | -0.296001542 | 6.578878272 | 6.97791E-10 |
| PKP2      | 0.490567675  | 11.15050741 | 7.04039E-10 |
| YWHAH     | -0.41745947  | 11.47777414 | 7.10502E-10 |

## DEG.infomation

|           |              |             |             |
|-----------|--------------|-------------|-------------|
| UBE2Q1    | -0.302187666 | 7.21487456  | 7.18102E-10 |
| GEM       | 0.582757535  | 7.563934564 | 7.21036E-10 |
| FOXS1     | 0.439473897  | 6.779515707 | 7.25882E-10 |
| USP13     | 0.419747546  | 10.38932106 | 7.28027E-10 |
| CCDC147   | 0.236039921  | 6.911844271 | 7.29676E-10 |
| IGFBP5    | 0.551640927  | 11.99858235 | 7.33746E-10 |
| DTX2      | -0.232793146 | 6.987581744 | 7.45044E-10 |
| TAF9L     | 0.301256748  | 7.517552788 | 7.45631E-10 |
| DMTF1     | 0.212818918  | 8.301117422 | 7.49303E-10 |
| GALT      | 0.301383656  | 8.151663853 | 7.55882E-10 |
| HIP1R     | -0.12029691  | 6.24615596  | 7.63231E-10 |
| LDB3      | 0.598094398  | 9.045555461 | 7.7136E-10  |
| SEMA5B    | 0.21924428   | 6.558102603 | 7.79246E-10 |
| C9ORF21   | -0.396728222 | 7.366705474 | 7.84547E-10 |
| KIAA1143  | 0.148630491  | 6.601389438 | 7.92716E-10 |
| TXNDC14   | -0.288155296 | 9.935504702 | 8.05135E-10 |
| RASSF4    | 0.289597228  | 7.908144247 | 8.0816E-10  |
| TNFRSF21  | -0.393065132 | 8.25593187  | 8.09155E-10 |
| CLEC16A   | -0.350714245 | 9.130490424 | 8.10222E-10 |
| CASZ1     | -0.314325694 | 8.560279877 | 8.13395E-10 |
| CCDC6     | -0.488516512 | 9.296958956 | 8.19713E-10 |
| TNRC6A    | 0.258975824  | 7.305920964 | 8.20826E-10 |
| SEMA6D    | 0.097004189  | 6.183439868 | 8.21785E-10 |
| LOC283953 | 0.236788191  | 6.226192882 | 8.22445E-10 |
| IMP4      | -0.404601339 | 10.42788267 | 8.24903E-10 |
| ZNF167    | 0.116637195  | 6.310047291 | 8.36912E-10 |
| C17ORF60  | -0.206723839 | 6.24232624  | 8.48545E-10 |
| RRM1      | 0.289537573  | 9.937417985 | 8.49373E-10 |
| CLTA      | -0.240907348 | 8.582651788 | 8.51626E-10 |
| ZFP2      | 0.225891088  | 6.621365562 | 8.80105E-10 |
| ZNF740    | 0.194458414  | 6.361291891 | 8.84252E-10 |
| C1ORF117  | -0.656667951 | 8.333284669 | 8.89038E-10 |
| LARP6     | -0.383151811 | 9.34674081  | 8.96406E-10 |
| MYH9      | -0.567584088 | 11.00579126 | 8.99617E-10 |
| PRKAB2    | 0.42289661   | 8.684839304 | 9.06541E-10 |
| ATHL1     | -0.273317682 | 6.622742046 | 9.17377E-10 |
| TOR3A     | -0.340796926 | 7.214753999 | 9.22884E-10 |
| GMFG      | -0.363617673 | 7.581970899 | 9.26552E-10 |
| FICD      | -0.297790316 | 6.913902105 | 9.40386E-10 |
| CADPS     | 0.223865934  | 6.586175454 | 9.44179E-10 |
| APRT      | -0.294290592 | 8.150120952 | 9.52031E-10 |
| HIF1AN    | 0.292812916  | 8.055632923 | 9.70836E-10 |
| ISG20L1   | -0.585031061 | 7.488431599 | 9.75193E-10 |
| ESAM      | -0.423010675 | 9.115281907 | 9.82264E-10 |
| GPAM      | 0.427520718  | 7.976416086 | 9.83402E-10 |
| SUB1      | 0.443985321  | 9.468692936 | 9.98352E-10 |
| TOM1      | -0.321866344 | 8.572845589 | 1.0189E-09  |
| SNX12     | 0.336454999  | 6.637841919 | 1.02893E-09 |
| NUP205    | -0.283914586 | 8.058903455 | 1.03682E-09 |
| DOK6      | 0.351348136  | 6.655787952 | 1.04141E-09 |
| CKLF      | -0.295216349 | 7.621979408 | 1.04985E-09 |

## DEG.infomation

|           |              |             |             |
|-----------|--------------|-------------|-------------|
| SLC25A11  | 0.461083603  | 8.830381588 | 1.05205E-09 |
| PSME4     | -0.317209129 | 9.997415688 | 1.05803E-09 |
| SRBD1     | 0.227712318  | 7.712826024 | 1.06339E-09 |
| OSBPL3    | -0.184599374 | 6.463299042 | 1.06559E-09 |
| RHOB      | -0.566868522 | 8.726623803 | 1.07273E-09 |
| S100A16   | -0.461447455 | 8.506230447 | 1.08065E-09 |
| OGFRL1    | -0.144978227 | 6.35890324  | 1.08681E-09 |
| CMAH      | -0.228440009 | 6.715366634 | 1.09083E-09 |
| SLC35F2   | -0.212361457 | 6.245075496 | 1.0963E-09  |
| ZNF839    | 0.245526153  | 6.819686714 | 1.10668E-09 |
| HEY2      | -0.929281652 | 9.306629852 | 1.11144E-09 |
| KBTBD7    | 0.260730352  | 6.848035385 | 1.11356E-09 |
| MKL2      | 0.292874242  | 7.240761865 | 1.12283E-09 |
| TNFRSF10A | -0.224638535 | 6.228517782 | 1.12926E-09 |
| RFWD2     | -0.251401507 | 8.760175017 | 1.13011E-09 |
| LIMCH1    | 0.450375422  | 11.2275501  | 1.13159E-09 |
| MUSTN1    | -0.8614957   | 8.061765408 | 1.15846E-09 |
| AACS      | -0.217000554 | 7.424180608 | 1.19676E-09 |
| TTC3      | 0.279880735  | 9.165463947 | 1.20763E-09 |
| PLEKHB1   | 0.420688416  | 7.321573519 | 1.20926E-09 |
| PTPN21    | 0.276744287  | 6.920049297 | 1.20942E-09 |
| KCNS3     | 0.282724066  | 6.915246771 | 1.2318E-09  |
| NFE2L1    | 0.495551695  | 11.06870537 | 1.24399E-09 |
| B4GALT1   | -0.304188282 | 7.502994225 | 1.24526E-09 |
| ADRM1     | -0.2698532   | 9.23398014  | 1.24616E-09 |
| TEX261    | -0.239750063 | 7.392734204 | 1.24745E-09 |
| ZNF641    | 0.256747925  | 7.249091874 | 1.25779E-09 |
| TCTA      | 0.265617348  | 7.706230892 | 1.26619E-09 |
| C9ORF100S | 0.249763934  | 7.630858698 | 1.28875E-09 |
| OPTN      | 0.391570578  | 10.27644368 | 1.30378E-09 |
| PFKFB4    | -0.223217741 | 6.630868554 | 1.3227E-09  |
| KIAA1128  | 0.342899284  | 9.871724097 | 1.32823E-09 |
| ANP32C    | 0.316676199  | 6.634969215 | 1.3436E-09  |
| PLCD3     | 0.308926684  | 7.04201924  | 1.36066E-09 |
| HMGCL     | 0.315511099  | 8.099333804 | 1.36679E-09 |
| DDO       | 0.297977738  | 7.026205434 | 1.36771E-09 |
| MGC35361  | 0.201506666  | 6.826769557 | 1.37366E-09 |
| SPIRE1    | 0.306494832  | 10.93304026 | 1.384E-09   |
| DDX59     | 0.209904635  | 7.172996986 | 1.39706E-09 |
| EFCAB7    | 0.183457662  | 6.517518115 | 1.40262E-09 |
| VAMP1     | 0.155365217  | 6.539165844 | 1.41431E-09 |
| KCTD12    | -0.384575101 | 7.796885305 | 1.42145E-09 |
| CCDC92    | -0.300143478 | 10.46749137 | 1.4262E-09  |
| FHOD3     | 0.493183434  | 11.5127532  | 1.43714E-09 |
| TXNDC13   | -0.359903916 | 8.873017249 | 1.45052E-09 |
| GAS1      | -0.472425227 | 7.824073776 | 1.45462E-09 |
| PAICS     | -0.299790253 | 8.402017711 | 1.46082E-09 |
| THOC5     | -0.26381421  | 8.40237591  | 1.46646E-09 |
| GTF2H5    | 0.380193208  | 10.08892076 | 1.46649E-09 |
| HSPA5     | -0.526684737 | 8.983517261 | 1.48251E-09 |
| CPT2      | 0.501505529  | 9.563445903 | 1.49024E-09 |



## DEG.infomation

|           |              |             |             |
|-----------|--------------|-------------|-------------|
| BMP4      | 0.295066502  | 6.941686009 | 1.49379E-09 |
| GLIPR2    | -0.510755713 | 9.06585033  | 1.49811E-09 |
| PPIL1     | -0.452519078 | 8.495629899 | 1.50803E-09 |
| WTIP      | 0.317871206  | 7.69923744  | 1.51362E-09 |
| FTSJ1     | -0.204048435 | 6.794134635 | 1.5141E-09  |
| MNDA      | -0.220490163 | 6.201686295 | 1.51887E-09 |
| CRELD2    | -0.33522341  | 9.517278134 | 1.529E-09   |
| TUB       | 0.259583649  | 6.854370514 | 1.53771E-09 |
| FOSL1     | -0.481212528 | 6.363154173 | 1.54172E-09 |
| TFPI      | -0.473501255 | 8.242614094 | 1.57426E-09 |
| ZNF83     | 0.312204845  | 7.438345859 | 1.59123E-09 |
| UBA3      | 0.474564191  | 8.92920842  | 1.60163E-09 |
| C10ORF78  | 0.292083758  | 7.363426195 | 1.60325E-09 |
| PSMB6     | -0.224887877 | 12.24489518 | 1.63686E-09 |
| FBXO4     | 0.135350621  | 6.554312764 | 1.65196E-09 |
| ZNF471    | 0.206353077  | 7.002311038 | 1.66076E-09 |
| MOBKL2A   | -0.218697714 | 6.952069147 | 1.66226E-09 |
| PFN4      | 0.234048282  | 6.65820285  | 1.66715E-09 |
| DBNL      | -0.300653255 | 9.000074198 | 1.68627E-09 |
| IL1R1     | -0.352978617 | 6.523920471 | 1.687E-09   |
| RASL11A   | -0.247233006 | 6.390341859 | 1.69052E-09 |
| AGRN      | 0.279632927  | 6.815212037 | 1.69935E-09 |
| FAM173B   | 0.256662522  | 7.244720496 | 1.70816E-09 |
| MARCH5    | -0.198650541 | 6.965300322 | 1.70868E-09 |
| GNB1L     | -0.28549757  | 6.528728539 | 1.71013E-09 |
| DPYSL4    | 0.761521665  | 10.17730147 | 1.71694E-09 |
| TUBB6     | -0.596916425 | 8.732511062 | 1.72108E-09 |
| FAM96B    | -0.342198331 | 10.37782039 | 1.73343E-09 |
| HTRA3     | 0.279483042  | 6.666858828 | 1.73362E-09 |
| CADM1     | 0.458361892  | 9.023142047 | 1.73615E-09 |
| MYH10     | 0.46197324   | 10.76845641 | 1.76042E-09 |
| IRX5      | 0.558680123  | 8.943681785 | 1.76322E-09 |
| MOBKL2C   | -0.197312176 | 7.143386594 | 1.77923E-09 |
| NDST1     | -0.340271367 | 6.626765742 | 1.78286E-09 |
| CA14      | -0.41053023  | 6.443558487 | 1.81025E-09 |
| CCDC45    | 0.245920052  | 8.276497141 | 1.84761E-09 |
| TPSAB1    | -0.446983485 | 6.813460508 | 1.85382E-09 |
| ATG4D     | -0.198460051 | 6.795893825 | 1.86211E-09 |
| MYL6B     | 0.235033476  | 10.30678299 | 1.86217E-09 |
| SEMA5A    | 0.369053921  | 7.849505748 | 1.8778E-09  |
| BOLA2     | -0.293000916 | 8.710964683 | 1.88333E-09 |
| IPO11     | 0.28785471   | 9.400998971 | 1.88482E-09 |
| MGC4172   | 0.28493414   | 8.395405058 | 1.91805E-09 |
| EMR2      | -0.313947697 | 6.483937652 | 1.93218E-09 |
| LOC149448 | 0.368036778  | 8.693935185 | 1.9372E-09  |
| STARD8    | -0.396562256 | 7.213657824 | 1.95746E-09 |
| FRMPD4    | 0.217892002  | 6.531361423 | 1.95941E-09 |
| TAF6L     | -0.284801395 | 8.124822058 | 1.9806E-09  |
| ADAMTSL5  | 0.315475376  | 7.361814284 | 2.01617E-09 |
| CSF1R     | -0.559415261 | 8.966517262 | 2.04744E-09 |
| ZDHHC8    | -0.281377393 | 10.4227584  | 2.0565E-09  |

## DEG.infomation

|              |              |             |             |
|--------------|--------------|-------------|-------------|
| P2RY5        | 0.336394023  | 8.078600984 | 2.05706E-09 |
| TRMT1        | -0.292335459 | 7.647561128 | 2.09827E-09 |
| DCAKD        | 0.321514926  | 9.74115349  | 2.11464E-09 |
| OBSL1        | 0.292965304  | 6.591652496 | 2.12254E-09 |
| PTPN12       | -0.301770188 | 8.467573241 | 2.14057E-09 |
| STX12        | -0.27979788  | 8.152288565 | 2.14058E-09 |
| POLR3F       | 0.233064118  | 7.23743178  | 2.14823E-09 |
| DEGS1        | -0.31852315  | 9.783825465 | 2.14898E-09 |
| PAOX         | -0.152713131 | 6.784651553 | 2.18637E-09 |
| LOC91461     | -0.476524034 | 7.811491974 | 2.18719E-09 |
| NNT          | 0.439998086  | 9.898996338 | 2.22839E-09 |
| SNORA64      | -0.200712143 | 6.387094043 | 2.23663E-09 |
| OGDHL        | 0.469526946  | 6.736733949 | 2.24352E-09 |
| RAD51AP1     | 0.265113253  | 6.597710232 | 2.25882E-09 |
| CLCN7        | -0.267500124 | 10.30444892 | 2.26044E-09 |
| ING3         | -0.20384468  | 6.776002994 | 2.31067E-09 |
| C20ORF46     | -0.469526611 | 7.756309163 | 2.36528E-09 |
| PRDX4        | -0.306042868 | 9.997858012 | 2.37251E-09 |
| CPSF4        | -0.219085076 | 8.883999392 | 2.37894E-09 |
| TESSP2       | 0.489355529  | 6.977696225 | 2.40212E-09 |
| PPP2CB       | -0.322423447 | 8.94655819  | 2.40816E-09 |
| LOC651309    | 0.353164551  | 7.229531165 | 2.42606E-09 |
| GAST         | 0.211845329  | 6.696315237 | 2.4558E-09  |
| GHITM        | 0.267372281  | 13.4042496  | 2.46475E-09 |
| RAB27A       | -0.127842774 | 6.214459673 | 2.46536E-09 |
| TRAF6        | 0.149195127  | 6.826343478 | 2.46553E-09 |
| MRPS6        | -0.389203493 | 10.87037079 | 2.49328E-09 |
| LOC388681    | 0.462766729  | 9.755945295 | 2.49517E-09 |
| ZNF204       | 0.386056695  | 6.742712416 | 2.5032E-09  |
| ADPGK        | -0.191448862 | 7.212957688 | 2.52328E-09 |
| AASS         | -0.287831868 | 7.430189886 | 2.57013E-09 |
| SLC9A9       | -0.251656107 | 6.577822516 | 2.58224E-09 |
| ATF5         | -0.32897945  | 7.640032303 | 2.60222E-09 |
| SYT15        | -0.197407493 | 6.952078109 | 2.60235E-09 |
| RCE1         | -0.18161941  | 6.59691227  | 2.60316E-09 |
| RP5-1022P6.2 | 0.307171357  | 7.53902143  | 2.6163E-09  |
| MLLT10       | 0.2877231    | 7.529529213 | 2.61677E-09 |
| LTA4H        | 0.205934083  | 10.11311689 | 2.61832E-09 |
| CORO6        | 0.396305164  | 9.123966272 | 2.66856E-09 |
| TMEM88       | -0.367753475 | 8.649750627 | 2.67347E-09 |
| LOC92270     | 0.250789587  | 6.880205326 | 2.67673E-09 |
| LACE1        | 0.188314776  | 6.501284445 | 2.67968E-09 |
| UBE2H        | 0.481445099  | 8.429117494 | 2.68379E-09 |
| C1ORF50      | 0.256596032  | 9.0526076   | 2.69156E-09 |
| PIGP         | 0.338157012  | 9.311192298 | 2.69896E-09 |
| PURA         | 0.254089374  | 7.569293997 | 2.70933E-09 |
| TMEM154      | -0.161714061 | 6.356200929 | 2.7309E-09  |
| FRAS1        | 0.184844077  | 6.583318986 | 2.74388E-09 |
| PPP2R5A      | -0.311360303 | 9.104349223 | 2.77362E-09 |
| RPUSD1       | -0.253521771 | 7.034312688 | 2.79421E-09 |
| FBXW11       | 0.263616619  | 8.757009073 | 2.82419E-09 |

## DEG.infomation

|            |              |             |             |
|------------|--------------|-------------|-------------|
| SLC39A11   | -0.217936616 | 6.71895405  | 2.82419E-09 |
| SCYL1BP1   | 0.226427401  | 7.41790508  | 2.82434E-09 |
| GADD45B    | -0.690657941 | 7.438546057 | 2.84555E-09 |
| PTEN       | -0.285949722 | 8.097833809 | 2.85465E-09 |
| TNFAIP6    | -0.373862325 | 6.842021659 | 2.89742E-09 |
| RAP1GAP    | -0.464096101 | 7.3063338   | 2.94397E-09 |
| SVEP1      | 0.500531354  | 8.910364599 | 2.97915E-09 |
| ANKAR      | 0.133037584  | 6.287935999 | 2.98794E-09 |
| COMMD8     | 0.352583576  | 8.106038607 | 3.00306E-09 |
| ABCB4      | 0.269535992  | 6.848524035 | 3.02023E-09 |
| GRINL1A    | 0.147243924  | 6.738242422 | 3.02287E-09 |
| FKBP9L     | 0.278976203  | 9.382723599 | 3.03852E-09 |
| VPS26B     | 0.307191569  | 8.683522525 | 3.08426E-09 |
| FPR2       | -0.135713518 | 6.048724694 | 3.09161E-09 |
| ENPEP      | -0.243451993 | 6.512099538 | 3.12219E-09 |
| VPS52      | 0.236815969  | 7.997202735 | 3.1262E-09  |
| TOP1MT     | -0.155218762 | 6.376331634 | 3.14959E-09 |
| RNF219     | 0.21156911   | 7.700946401 | 3.1685E-09  |
| NCRNA00153 | 0.263755999  | 6.80984456  | 3.16947E-09 |
| NEXN       | 0.324814754  | 11.76881529 | 3.17444E-09 |
| GCNT2      | 0.331982491  | 7.343292473 | 3.1855E-09  |
| TMEM158    | -0.648090893 | 7.115744196 | 3.22638E-09 |
| JMJD1A     | 0.317805059  | 7.665799056 | 3.23856E-09 |
| ADPRHL1    | 0.574677573  | 10.30899723 | 3.24855E-09 |
| PTGES2     | -0.259667685 | 9.943570396 | 3.27839E-09 |
| LOC653904  | -0.183233743 | 6.222330439 | 3.28801E-09 |
| CHIC2      | -0.478928207 | 8.850015605 | 3.29795E-09 |
| TMEM11     | -0.282808048 | 7.391620527 | 3.29901E-09 |
| FAM69B     | 0.2362855    | 7.637454181 | 3.31342E-09 |
| GPR34      | -0.191173364 | 6.249963565 | 3.3386E-09  |
| TNC        | -0.818372261 | 7.323277986 | 3.35491E-09 |
| ABTB1      | 0.333401075  | 8.236085576 | 3.393E-09   |
| ITGB3      | -0.219408685 | 6.147819902 | 3.42187E-09 |
| KIAA0672   | -0.328522017 | 7.901291585 | 3.42494E-09 |
| HTATIP2    | -0.428816931 | 8.100294831 | 3.43009E-09 |
| TTPAL      | -0.228179258 | 6.880105538 | 3.44604E-09 |
| GOPC       | 0.289531031  | 7.80571642  | 3.45666E-09 |
| PKIG       | 0.358998078  | 7.142861124 | 3.457E-09   |
| LOC440733  | -0.273581402 | 13.25223996 | 3.46044E-09 |
| FXVD5      | -0.402592982 | 8.101720329 | 3.5126E-09  |
| TLN2       | 0.422856713  | 8.488586989 | 3.5453E-09  |
| RPL37      | 0.220307382  | 7.001628106 | 3.56401E-09 |
| ARID5A     | 0.246323745  | 6.548915023 | 3.56602E-09 |
| BRD7       | 0.208529807  | 8.577160051 | 3.56936E-09 |
| C11ORF46   | 0.377534796  | 8.629643469 | 3.57332E-09 |
| LYSMD4     | 0.236820578  | 7.6669111   | 3.57788E-09 |
| SPHK1      | -0.398597915 | 6.433299029 | 3.58164E-09 |
| KAZALD1    | 0.377364667  | 7.254558117 | 3.64633E-09 |
| ASNS       | -0.547640193 | 7.75304932  | 3.66135E-09 |
| FLJ40142   | 0.18349444   | 6.90337416  | 3.66614E-09 |
| KIAA1160   | 0.205922701  | 8.043639293 | 3.699E-09   |

## DEG.infomation

|           |              |             |             |
|-----------|--------------|-------------|-------------|
| MRPL40    | 0.28646217   | 9.737437539 | 3.76371E-09 |
| SYVN1     | -0.270445851 | 7.878153159 | 3.77137E-09 |
| CTPS2     | 0.184578327  | 7.175204413 | 3.79932E-09 |
| MAGEE1    | 0.230729933  | 7.032035824 | 3.83429E-09 |
| SBF1      | -0.297893958 | 8.504227908 | 3.83785E-09 |
| PKNOX2    | -0.248861031 | 6.662477091 | 3.86641E-09 |
| HNRPUL1   | -0.245227492 | 9.407279577 | 3.88603E-09 |
| CLCF1     | -0.523634972 | 6.614535414 | 3.89515E-09 |
| HLA-B     | -0.41468141  | 10.25664859 | 3.933E-09   |
| FLJ14213  | 0.260918087  | 6.565613163 | 3.93758E-09 |
| TGFA      | -0.157838307 | 6.160710821 | 3.9405E-09  |
| ZNF684    | 0.388593053  | 7.513848832 | 3.95716E-09 |
| PIP5K1C   | -0.316934088 | 8.415813596 | 3.99676E-09 |
| ZFPM2     | 0.299922176  | 7.602427851 | 4.00633E-09 |
| ALPK1     | -0.244831084 | 6.480003101 | 4.02934E-09 |
| ALDH16A1  | -0.21070966  | 6.612037257 | 4.09478E-09 |
| RAB15     | -0.637967909 | 7.350469852 | 4.10796E-09 |
| SMPDL3A   | -0.308036399 | 6.909614708 | 4.16122E-09 |
| NDC80     | 0.169636885  | 6.331140977 | 4.22067E-09 |
| INTS2     | 0.360924423  | 7.876343111 | 4.23246E-09 |
| UCHL1     | 0.840837896  | 7.439063275 | 4.24311E-09 |
| LOC652002 | 0.372062647  | 7.123970586 | 4.25111E-09 |
| TMEM147   | -0.266426364 | 10.59958727 | 4.25654E-09 |
| THOP1     | -0.3095927   | 7.914667594 | 4.28799E-09 |
| C17ORF61  | 0.295677008  | 11.12713461 | 4.29253E-09 |
| PSMD8     | -0.344003285 | 10.3102996  | 4.34629E-09 |
| THOC4     | -0.310446775 | 7.597430993 | 4.34753E-09 |
| PAK1      | 0.381795335  | 6.959315271 | 4.36361E-09 |
| PDE6B     | 0.204265889  | 6.261461003 | 4.3979E-09  |
| RAG1AP1   | -0.290130217 | 7.143570585 | 4.45513E-09 |
| LRIG3     | 0.178740082  | 6.401321101 | 4.47776E-09 |
| ACAT1     | 0.343394584  | 12.84478122 | 4.48642E-09 |
| LOC643961 | 0.345846046  | 6.341521813 | 4.50301E-09 |
| LAMA5     | -0.346380722 | 10.79394675 | 4.61637E-09 |
| TNFAIP2   | -0.270722455 | 6.53332786  | 4.62652E-09 |
| SF3B1     | 0.161541457  | 8.389924925 | 4.71404E-09 |
| STK40     | -0.378039293 | 9.12494096  | 4.72576E-09 |
| FLJ10081  | 0.255279518  | 8.919897617 | 4.73767E-09 |
| PRKX      | -0.198337833 | 6.631605521 | 4.7647E-09  |
| PBX1      | 0.234006752  | 7.76045098  | 4.78124E-09 |
| NOV       | 0.465945645  | 7.391217104 | 4.79324E-09 |
| RALB      | -0.295057991 | 10.22452025 | 4.86695E-09 |
| SRGAP1    | -0.363093109 | 6.833959574 | 4.87494E-09 |
| TXNDC12   | 0.266978302  | 9.881152057 | 4.87974E-09 |
| RABL4     | 0.309634546  | 8.140903129 | 4.90622E-09 |
| CARM1     | -0.33548982  | 9.790279902 | 4.90897E-09 |
| EHD1      | -0.315117719 | 10.16916179 | 4.96898E-09 |
| CLASP2    | 0.422241805  | 7.999994523 | 4.98104E-09 |
| TADA1L    | 0.249546373  | 7.559300273 | 5.02636E-09 |
| NANS      | -0.318430986 | 7.923307476 | 5.05287E-09 |
| LOC652164 | 0.258973622  | 6.521240928 | 5.06398E-09 |

## DEG.infomation

|           |              |             |             |
|-----------|--------------|-------------|-------------|
| BHLHB3    | 0.311089175  | 7.319128264 | 5.10504E-09 |
| IFIT1     | 0.620947135  | 8.338211054 | 5.12888E-09 |
| ACAD10    | 0.374818435  | 8.040753275 | 5.13021E-09 |
| MTMR4     | 0.403800411  | 8.399415737 | 5.14992E-09 |
| FAT       | 0.317348576  | 9.631418555 | 5.17359E-09 |
| PPFIA4    | 0.454076478  | 8.254178763 | 5.23767E-09 |
| ZMIZ2     | -0.184452184 | 7.080301919 | 5.25553E-09 |
| DHRS7     | -0.328072787 | 9.780674132 | 5.43728E-09 |
| BSDC1     | -0.404886411 | 7.816326445 | 5.44715E-09 |
| JMJD1B    | 0.313748764  | 7.89804726  | 5.59326E-09 |
| PTPRR     | 0.184179281  | 6.523155498 | 5.59843E-09 |
| PDIK1L    | 0.223125774  | 7.186087071 | 5.62862E-09 |
| MTMR2     | 0.156512053  | 7.088641548 | 5.65338E-09 |
| POLE4     | -0.356777072 | 10.34557933 | 5.66598E-09 |
| STX19     | 0.224125545  | 6.552228257 | 5.6903E-09  |
| RAD17     | 0.118526401  | 6.50124835  | 5.7045E-09  |
| C14ORF133 | 0.250153107  | 7.399279356 | 5.72915E-09 |
| LOC440503 | -0.221989305 | 6.259172434 | 5.77776E-09 |
| EMP1      | -0.554425906 | 9.886848515 | 5.7842E-09  |
| RAGE      | -0.278774588 | 8.848779594 | 5.79264E-09 |
| NPHP4     | -0.144904225 | 6.359960711 | 5.85815E-09 |
| ABCG1     | -0.226326105 | 6.568833934 | 5.86568E-09 |
| MXI1      | 0.182515406  | 6.78050242  | 5.86965E-09 |
| DBP       | 0.416793824  | 6.934588169 | 5.87169E-09 |
| ATP1B4    | 0.350127491  | 6.319106116 | 5.91499E-09 |
| IFNAR2    | -0.157241164 | 6.872261709 | 6.08548E-09 |
| PPP1CA    | -0.283628917 | 8.525296401 | 6.09223E-09 |
| NOL8      | 0.206984629  | 7.71347862  | 6.15019E-09 |
| NAP5      | 0.202990206  | 6.35975655  | 6.2844E-09  |
| COL9A1    | 0.198401992  | 6.256308448 | 6.30972E-09 |
| PTPN4     | 0.2620251    | 8.055953892 | 6.31198E-09 |
| RFC1      | 0.195548103  | 7.934925256 | 6.33219E-09 |
| BMP1      | -0.126510828 | 6.351035336 | 6.39808E-09 |
| SDCBP     | -0.443408187 | 8.941977479 | 6.40254E-09 |
| KIAA0889  | -0.176802917 | 6.486173324 | 6.42917E-09 |
| FCGR2B    | -0.188048448 | 6.173907307 | 6.43975E-09 |
| C15ORF17  | -0.340933562 | 8.805012735 | 6.4611E-09  |
| SLC36A1   | -0.268735158 | 6.493131854 | 6.51573E-09 |
| PSD4      | -0.159968618 | 6.139671543 | 6.52072E-09 |
| REPS2     | -0.128338242 | 6.228695065 | 6.52224E-09 |
| SH3RF1    | -0.303585427 | 7.186014703 | 6.6517E-09  |
| FKBP4     | -0.322347343 | 7.686721092 | 6.65809E-09 |
| C1ORF213  | 0.137535283  | 6.248072189 | 6.68075E-09 |
| CD55      | -0.490589173 | 9.489743872 | 6.85514E-09 |
| SLC9A1    | -0.422150712 | 9.001254355 | 6.90858E-09 |
| CASD1     | 0.279033005  | 7.220975108 | 6.93557E-09 |
| TMEFF2    | -0.280667894 | 6.080637496 | 7.00516E-09 |
| C20ORF200 | 0.288978467  | 6.604852541 | 7.0148E-09  |
| RAB35     | -0.334886394 | 7.68299042  | 7.03221E-09 |
| HEATR1    | -0.356351198 | 8.05165169  | 7.03326E-09 |
| AGL       | 0.299144851  | 8.088095995 | 7.08585E-09 |

## DEG.infomation

|           |              |             |             |
|-----------|--------------|-------------|-------------|
| WDR74     | -0.2664461   | 7.897679755 | 7.14072E-09 |
| RAB26     | 0.223243378  | 6.555795752 | 7.22014E-09 |
| LAD1      | -0.619216879 | 6.755271794 | 7.31535E-09 |
| SLC4A2    | -0.281815874 | 7.295212431 | 7.43141E-09 |
| GTF2E2    | -0.346997943 | 9.420820548 | 7.43695E-09 |
| WDR51A    | -0.215886506 | 6.737522755 | 7.46073E-09 |
| ZCCHC9    | 0.305043594  | 8.40613721  | 7.5219E-09  |
| SYNM      | 0.361513618  | 10.69682302 | 7.59866E-09 |
| MRPL10    | 0.262271269  | 7.86738364  | 7.68189E-09 |
| LOC644615 | -0.379627999 | 7.481384343 | 7.68209E-09 |
| YWHAZ     | -0.339344882 | 10.23777871 | 7.69027E-09 |
| GRWD1     | -0.250247299 | 8.077055081 | 7.78049E-09 |
| EXOC7     | -0.219241464 | 8.101437133 | 7.83721E-09 |
| RNASSET2  | -0.305305203 | 9.917180422 | 7.85334E-09 |
| HNRPH3    | 0.329121054  | 8.189990878 | 7.87665E-09 |
| ARFGAP3   | -0.295730685 | 7.242950242 | 7.94223E-09 |
| DUS3L     | -0.299202729 | 7.47587027  | 7.9596E-09  |
| RRS1      | -0.32379906  | 7.793701543 | 7.97505E-09 |
| SDCCAG10  | 0.230167548  | 9.603748527 | 8.01108E-09 |
| FAM43B    | -0.354185816 | 7.008637246 | 8.04566E-09 |
| ICA1L     | 0.123275029  | 6.297293285 | 8.17903E-09 |
| NLRX1     | 0.288502527  | 8.184655056 | 8.22025E-09 |
| LOC646168 | 0.276903111  | 6.564987701 | 8.22613E-09 |
| ZCWPW2    | 0.182199444  | 6.67890881  | 8.31194E-09 |
| COMP      | 1.09908573   | 7.09204958  | 8.49124E-09 |
| AEBP1     | 0.871540912  | 8.631734564 | 8.65583E-09 |
| AARS      | -0.269374181 | 10.95709071 | 8.70171E-09 |
| ZCRB1     | 0.290767824  | 7.099815491 | 8.76515E-09 |
| SYTL2     | 0.354064234  | 7.017330972 | 8.7971E-09  |
| TNNI3     | 0.338425229  | 13.77489635 | 8.84187E-09 |
| HSD17B10  | -0.246650431 | 8.344942641 | 8.86179E-09 |
| FAM70B    | -0.127731899 | 6.406465724 | 8.87919E-09 |
| ARNTL     | -0.283343733 | 6.671585278 | 8.91209E-09 |
| LIPT1     | 0.237623288  | 7.314130888 | 8.98133E-09 |
| MED12     | 0.218500056  | 7.26809627  | 9.0045E-09  |
| GON4L     | 0.155045841  | 7.120754082 | 9.01944E-09 |
| CARKD     | 0.272210983  | 8.829851501 | 9.13783E-09 |
| AMY1C     | -0.601542267 | 10.99836613 | 9.23323E-09 |
| STAG3L4   | 0.39046222   | 7.785208685 | 9.28029E-09 |
| ANAPC10   | 0.25832568   | 8.100431783 | 9.29108E-09 |
| REST      | 0.130673686  | 6.338517674 | 9.33392E-09 |
| ELF3      | -0.396940223 | 6.131540384 | 9.40024E-09 |
| ABHD5     | -0.490190389 | 7.570944914 | 9.47767E-09 |
| NEK6      | -0.210772237 | 6.307335942 | 9.48657E-09 |
| RYR3      | 0.202238708  | 6.230223683 | 9.53046E-09 |
| MIER2     | -0.224355936 | 6.509080321 | 9.53807E-09 |
| SLC6A6    | -0.403218114 | 6.434037032 | 9.62617E-09 |
| PPARGC1B  | 0.42885292   | 7.665754108 | 9.69869E-09 |
| PTGER4    | 0.40663483   | 8.214464398 | 9.79078E-09 |
| SLC30A9   | 0.272293921  | 10.07444184 | 9.8586E-09  |
| UACA      | 0.131985932  | 6.465195817 | 1.00381E-08 |

## DEG.infomation

|            |              |             |             |
|------------|--------------|-------------|-------------|
| TMEM205    | -0.265647969 | 11.16032424 | 1.00384E-08 |
| LGALS9     | -0.213329121 | 6.588529855 | 1.00445E-08 |
| PEX7       | 0.445000812  | 8.42235078  | 1.01895E-08 |
| ERCC6      | 0.183785337  | 6.393446154 | 1.02036E-08 |
| CC2D2A     | 0.219217529  | 6.596320347 | 1.02253E-08 |
| C3ORF1     | 0.322140814  | 8.269294077 | 1.02996E-08 |
| GNL2       | -0.408120535 | 9.808041376 | 1.03841E-08 |
| PTPN3      | 0.713848668  | 8.318202996 | 1.03937E-08 |
| C10ORF104  | 0.427136442  | 9.062901465 | 1.03963E-08 |
| TARBP1     | 0.230689753  | 7.197827285 | 1.04265E-08 |
| MTHFD1L    | -0.391112754 | 6.970973857 | 1.04643E-08 |
| FAM108C1   | 0.369976766  | 8.437679339 | 1.08146E-08 |
| F8         | -0.208754873 | 6.786436542 | 1.09144E-08 |
| SASH3      | -0.206192962 | 6.439757229 | 1.09832E-08 |
| PRCC       | -0.150681676 | 6.952449573 | 1.13755E-08 |
| PDZD4      | 0.157034326  | 6.306135019 | 1.14155E-08 |
| OR51E1     | 0.30978261   | 6.781336114 | 1.14946E-08 |
| NACA       | 0.177161875  | 12.67279931 | 1.14947E-08 |
| RAB32      | -0.409115768 | 7.664178458 | 1.1508E-08  |
| ASRGL1     | -0.194052519 | 6.046578133 | 1.15286E-08 |
| ST6GALNAC4 | 0.268262937  | 7.642739637 | 1.176E-08   |
| MGAT1      | -0.30880272  | 9.428390517 | 1.17992E-08 |
| INADL      | 0.303901604  | 7.206028145 | 1.18332E-08 |
| SOX11      | -0.312804134 | 6.260757396 | 1.19491E-08 |
| CRNKL1     | 0.180708468  | 6.774658246 | 1.19788E-08 |
| CIRH1A     | -0.364617628 | 8.776903973 | 1.20736E-08 |
| ARHGEF18   | -0.27650352  | 8.71734172  | 1.22237E-08 |
| LPHN3      | 0.253465747  | 6.459060397 | 1.22533E-08 |
| FAM73B     | 0.273038487  | 7.973934055 | 1.22934E-08 |
| IMPACT     | 0.150602111  | 6.342754961 | 1.23497E-08 |
| SCYL3      | 0.141418068  | 6.7948271   | 1.24429E-08 |
| C6ORF125   | 0.322789251  | 11.52096408 | 1.24509E-08 |
| ATP6V0A1   | -0.369274803 | 9.296281528 | 1.24963E-08 |
| C20ORF166  | 0.35646      | 6.967859996 | 1.25027E-08 |
| TBC1D7     | 0.386896966  | 9.124701768 | 1.25726E-08 |
| PLCG1      | -0.279494758 | 7.277411876 | 1.26193E-08 |
| YPEL3      | 0.422825854  | 8.931468753 | 1.26852E-08 |
| LOC285359  | 0.255089752  | 6.455685246 | 1.27126E-08 |
| ZC3H14     | 0.101125732  | 6.559681429 | 1.27238E-08 |
| PI4KAP1    | -0.246114893 | 6.829157741 | 1.27705E-08 |
| PAK2       | -0.267509196 | 7.753415734 | 1.27745E-08 |
| KLHDC2     | 0.442603516  | 10.86429836 | 1.2913E-08  |
| CMTM6      | -0.246355521 | 7.587614784 | 1.29528E-08 |
| STK38      | -0.359394634 | 8.491771356 | 1.2976E-08  |
| WFDC1      | -0.235032031 | 6.252592986 | 1.30756E-08 |
| CHMP4B     | -0.310319515 | 9.771756017 | 1.30849E-08 |
| NRAS       | -0.19878341  | 7.737591594 | 1.31032E-08 |
| ALS2CR8    | 0.167426884  | 6.272647144 | 1.33167E-08 |
| FAM179B    | 0.459436517  | 8.091054324 | 1.3531E-08  |
| AKR1A1     | -0.20078389  | 8.738479165 | 1.36117E-08 |
| OPA1       | 0.25884281   | 8.739281836 | 1.36362E-08 |

## DEG.infomation

|           |              |             |             |
|-----------|--------------|-------------|-------------|
| PFKFB2    | 0.502773406  | 7.803338273 | 1.39277E-08 |
| LOC643319 | -0.362661516 | 6.605533298 | 1.4008E-08  |
| CROP      | 0.39097729   | 8.388044886 | 1.40413E-08 |
| DIP2B     | 0.239127685  | 8.733906226 | 1.41648E-08 |
| TMEM116   | 0.446889781  | 9.064795084 | 1.41774E-08 |
| RHEB      | -0.308725102 | 10.53847855 | 1.42284E-08 |
| PRKCSH    | -0.191207622 | 7.556182972 | 1.44119E-08 |
| MPHOSPH9  | 0.174821483  | 6.981878173 | 1.44889E-08 |
| FAM50A    | -0.32010303  | 10.55767525 | 1.4643E-08  |
| MAP4K4    | 0.228956932  | 8.083476169 | 1.46467E-08 |
| FLJ45244  | 0.260302869  | 7.234763879 | 1.47011E-08 |
| PTTG1IP   | -0.226995888 | 11.27943575 | 1.47594E-08 |
| C17ORF44  | 0.193960932  | 6.53011507  | 1.49529E-08 |
| GMPPA     | -0.248907171 | 7.414168875 | 1.49921E-08 |
| RRAS      | 0.3716811    | 11.02935291 | 1.50195E-08 |
| TMTC1     | -0.306074829 | 7.307609904 | 1.50725E-08 |
| AMD1      | -0.461331385 | 9.415940072 | 1.51342E-08 |
| IGSF21    | -0.179754969 | 6.238881423 | 1.51662E-08 |
| IL10RB    | -0.255719465 | 8.455675117 | 1.51916E-08 |
| CD93      | -0.474587902 | 10.34022303 | 1.5205E-08  |
| PDSS1     | -0.221938558 | 7.009857244 | 1.52524E-08 |
| ENG       | -0.383924478 | 9.663527425 | 1.52675E-08 |
| PDZRN3    | 0.314757038  | 7.121693523 | 1.53009E-08 |
| S100A6    | 0.40069368   | 11.79649005 | 1.53615E-08 |
| MYL7      | 0.668343616  | 13.38597689 | 1.53817E-08 |
| C11ORF17  | 0.239564155  | 8.259293883 | 1.53955E-08 |
| MMP23B    | 0.53809875   | 9.414621483 | 1.55558E-08 |
| OSBPL9    | 0.263887749  | 8.808801069 | 1.56849E-08 |
| SGPP2     | -0.495451919 | 6.707885144 | 1.57378E-08 |
| VRK1      | 0.189630779  | 6.838860285 | 1.58324E-08 |
| EIF6      | -0.334223969 | 7.881635626 | 1.58732E-08 |
| ATF4      | -0.3968728   | 10.60341052 | 1.5919E-08  |
| LOC653377 | 0.311516482  | 10.50546122 | 1.6087E-08  |
| NFE2      | -0.190730105 | 6.195090839 | 1.61001E-08 |
| FNDC4     | -0.191979204 | 6.399640976 | 1.61047E-08 |
| APOM      | 0.18913251   | 6.68163165  | 1.62318E-08 |
| PLEKHG3   | 0.26557909   | 7.569579778 | 1.64759E-08 |
| SLC38A2   | -0.660521721 | 9.375680205 | 1.65439E-08 |
| AP2M1     | 0.254764107  | 9.874818116 | 1.65489E-08 |
| HSZFP36   | 0.231697526  | 7.366158952 | 1.6584E-08  |
| LZTS1     | -0.236942126 | 6.605910905 | 1.66428E-08 |
| WDR62     | 0.50576087   | 7.525594342 | 1.67266E-08 |
| CLNS1A    | 0.26898904   | 9.720255251 | 1.67931E-08 |
| CCNG2     | 0.242263148  | 6.649882977 | 1.68678E-08 |
| AP3S2     | 0.201423361  | 7.462657356 | 1.69259E-08 |
| FGF7      | -0.233793034 | 6.199723511 | 1.70083E-08 |
| AMT       | 0.492055166  | 8.702265025 | 1.70318E-08 |
| ST8SIA4   | 0.135590391  | 6.338110279 | 1.71144E-08 |
| PREX1     | -0.20965794  | 6.337838531 | 1.72177E-08 |
| FZD9      | -0.311189973 | 6.232901967 | 1.74671E-08 |
| LRRN3     | -0.361226408 | 6.49784418  | 1.77012E-08 |



## DEG.infomation

|           |              |             |             |
|-----------|--------------|-------------|-------------|
| TRIM52    | 0.211656226  | 6.804795546 | 1.78963E-08 |
| MGRN1     | -0.295202984 | 7.312434035 | 1.82039E-08 |
| THBS1     | -1.040279616 | 9.126107567 | 1.82903E-08 |
| TMEM55A   | 0.402982624  | 8.394832881 | 1.82993E-08 |
| C12ORF26  | 0.301340086  | 8.04874861  | 1.84884E-08 |
| OSGEP     | -0.259716153 | 7.894305722 | 1.8679E-08  |
| GCLC      | 0.239881489  | 7.268194295 | 1.868E-08   |
| LOC648470 | 0.355736218  | 7.146398701 | 1.89456E-08 |
| PRR13     | -0.275855797 | 10.50891333 | 1.89573E-08 |
| CLK1      | 0.289764875  | 8.640426867 | 1.92163E-08 |
| PRPF4     | -0.282512603 | 8.512149535 | 1.92944E-08 |
| TSPAN9    | 0.372923556  | 12.9859479  | 1.93641E-08 |
| EFTUD1    | -0.216814914 | 7.099294526 | 1.95109E-08 |
| HINT3     | 0.162205958  | 6.603661087 | 1.95907E-08 |
| GOLPH3    | -0.266706402 | 9.013095655 | 1.98072E-08 |
| C7ORF23   | -0.252485627 | 7.441216056 | 1.98254E-08 |
| ST3GAL3   | 0.202500665  | 7.639191485 | 1.99011E-08 |
| LOC338758 | 0.254706593  | 7.16278631  | 2.00347E-08 |
| ABCC8     | 0.388952714  | 6.945226336 | 2.00797E-08 |
| LOC731895 | 0.180151592  | 6.325590684 | 2.02484E-08 |
| LST1      | -0.15421521  | 6.41225686  | 2.03603E-08 |
| FSD2      | 0.841948403  | 10.11375411 | 2.0364E-08  |
| ABCE1     | -0.290285618 | 8.025198539 | 2.04704E-08 |
| BCAS4     | 0.201677127  | 6.861457354 | 2.06225E-08 |
| ABCB6     | -0.239269406 | 7.704310591 | 2.06362E-08 |
| PDPN      | -0.378148386 | 7.208899324 | 2.07362E-08 |
| ACOX1     | 0.206487914  | 6.854355236 | 2.09097E-08 |
| BP75      | 0.234701055  | 7.086197488 | 2.1076E-08  |
| C15ORF58  | 0.185482238  | 6.490685921 | 2.11178E-08 |
| GBAS      | 0.400302469  | 10.67480589 | 2.13921E-08 |
| CITED2    | -0.452967598 | 10.05457322 | 2.14066E-08 |
| LOC647108 | -0.181759398 | 6.337606027 | 2.14444E-08 |
| YTHDF1    | -0.227696058 | 8.836696983 | 2.14737E-08 |
| ALDH7A1   | 0.344329443  | 9.346291563 | 2.14939E-08 |
| TMEM115   | -0.238729045 | 8.567086502 | 2.16179E-08 |
| MT3       | -0.396659281 | 6.882211226 | 2.19676E-08 |
| UFSP2     | 0.309766038  | 9.138935215 | 2.19915E-08 |
| ZNF426    | 0.201237931  | 7.614402984 | 2.20208E-08 |
| GPT       | -0.426476377 | 8.887567184 | 2.20459E-08 |
| PCDH1     | -0.111832039 | 6.178456194 | 2.21273E-08 |
| ZNF350    | 0.172875459  | 6.772634881 | 2.23583E-08 |
| HAS2      | -0.086274359 | 6.12782981  | 2.24193E-08 |
| DDIT4L    | 0.247630023  | 6.637482288 | 2.24792E-08 |
| FREM1     | 0.342312     | 6.412470097 | 2.25083E-08 |
| PANK1     | 0.337609615  | 7.767342827 | 2.27642E-08 |
| C16ORF35  | -0.195613415 | 7.54090671  | 2.27781E-08 |
| CYGB      | -0.367164494 | 8.523635803 | 2.30773E-08 |
| ZNF512    | 0.260569719  | 8.471321483 | 2.32296E-08 |
| C17ORF53  | -0.223596227 | 6.533509891 | 2.34699E-08 |
| CCDC55    | 0.268567887  | 7.799526463 | 2.34728E-08 |
| BMPR1A    | 0.208951124  | 7.461789556 | 2.44163E-08 |

## DEG.infomation

|           |              |             |             |
|-----------|--------------|-------------|-------------|
| MAFF      | -0.269374546 | 6.811549763 | 2.44762E-08 |
| DUSP5     | -0.673559166 | 8.211783084 | 2.49241E-08 |
| PLOD3     | -0.308163076 | 9.281623839 | 2.50212E-08 |
| GLIS3     | -0.107297788 | 6.281457769 | 2.50866E-08 |
| EVL       | 0.339243806  | 10.72497428 | 2.53114E-08 |
| TNNT3     | 0.547380573  | 7.789764173 | 2.55805E-08 |
| VAMP5     | -0.373083527 | 9.942266309 | 2.56028E-08 |
| ARPC1A    | 0.258979227  | 10.58503957 | 2.56554E-08 |
| MRPL45    | 0.216086173  | 9.064072021 | 2.58616E-08 |
| C9ORF9    | 0.323143468  | 7.270882559 | 2.59627E-08 |
| VNN2      | -0.147992413 | 6.256427367 | 2.6055E-08  |
| FLOT2     | -0.320779372 | 10.97956641 | 2.60562E-08 |
| SYT11     | 0.425119436  | 9.941511182 | 2.61716E-08 |
| PYCR2     | 0.22697284   | 8.960131711 | 2.64436E-08 |
| LOC644310 | 0.391752041  | 9.063675221 | 2.66828E-08 |
| NGF       | -0.376598745 | 7.293557275 | 2.67292E-08 |
| DHRX      | 0.233283211  | 6.887094691 | 2.67351E-08 |
| DDX21     | -0.452802342 | 8.410023392 | 2.69724E-08 |
| LOC388588 | 0.525416659  | 9.175413767 | 2.69748E-08 |
| VIP       | 0.221273165  | 6.710649571 | 2.71231E-08 |
| DNAJB11   | -0.414554855 | 10.2972247  | 2.71453E-08 |
| PLEKHA2   | 0.310136454  | 8.384431563 | 2.71849E-08 |
| KBTBD4    | 0.17352973   | 6.996079404 | 2.71854E-08 |
| ZXDA      | 0.07972566   | 6.194722714 | 2.7266E-08  |
| HOXB1     | -0.178723959 | 6.313901387 | 2.73073E-08 |
| ABI3      | -0.242590072 | 6.756676406 | 2.77554E-08 |
| ROGDI     | 0.338938335  | 8.357201936 | 2.77781E-08 |
| HNRPM     | -0.232071284 | 9.961533523 | 2.79466E-08 |
| IQWD1     | 0.250629998  | 10.32229851 | 2.83259E-08 |
| GPR44     | 0.312276482  | 6.743704903 | 2.83904E-08 |
| TNFSF10   | 0.489468928  | 8.343782254 | 2.84862E-08 |
| STX2      | -0.336479473 | 7.779468215 | 2.85199E-08 |
| HDAC3     | 0.175386063  | 8.534348113 | 2.85437E-08 |
| NTN4      | 0.356605017  | 7.997194233 | 2.85626E-08 |
| DUS4L     | 0.29471768   | 8.129698292 | 2.85817E-08 |
| LOC93622  | 0.23272375   | 7.677330054 | 2.87025E-08 |
| ZNF550    | 0.148275308  | 6.810542122 | 2.87726E-08 |
| ARMCX6    | 0.229410443  | 7.667354262 | 2.88967E-08 |
| UPP1      | -0.290492882 | 7.766695586 | 2.90102E-08 |
| HAGH      | 0.294104472  | 10.81902286 | 2.92477E-08 |
| DYRK2     | 0.316906674  | 8.177290817 | 2.92708E-08 |
| ALS2CR4   | 0.302430623  | 8.505433327 | 2.95182E-08 |
| GPRIN3    | 0.218715673  | 6.671585496 | 2.95231E-08 |
| FLJ10213  | -0.246649271 | 7.121228587 | 2.96896E-08 |
| EFEMP1    | -0.538833655 | 7.862396228 | 2.98934E-08 |
| CDKN2C    | 0.28448575   | 7.007721405 | 2.99553E-08 |
| ZNF605    | 0.218049017  | 6.95243805  | 3.01037E-08 |
| ZNF493    | 0.161023234  | 6.630951454 | 3.02553E-08 |
| PTPN6     | -0.132999956 | 6.280014892 | 3.0592E-08  |
| ALG9      | -0.31748777  | 7.721767156 | 3.06763E-08 |
| SEPW1     | 0.288782408  | 11.9299042  | 3.07368E-08 |

## DEG.infomation

|           |              |             |             |
|-----------|--------------|-------------|-------------|
| DNAJC24   | 0.307175861  | 7.835247125 | 3.21788E-08 |
| C1ORF190  | 0.279252205  | 7.2155066   | 3.24481E-08 |
| CTRC      | -0.175742643 | 6.965272424 | 3.25108E-08 |
| CHRD      | -0.185319761 | 6.594635649 | 3.28266E-08 |
| PEX16     | -0.20181573  | 7.573340783 | 3.28844E-08 |
| HMG20B    | -0.262298912 | 9.188296041 | 3.30174E-08 |
| SLC25A30  | 0.268067547  | 6.812841228 | 3.31158E-08 |
| ZNF133    | 0.18487082   | 7.114658624 | 3.33783E-08 |
| PLA2G7    | -0.162280249 | 6.078486712 | 3.41049E-08 |
| PERP      | 0.565257775  | 8.103203888 | 3.4413E-08  |
| SATB1     | 0.230388776  | 6.682377363 | 3.44263E-08 |
| BCL2      | 0.369822599  | 7.285107471 | 3.46538E-08 |
| PCDHGB4   | -0.172545666 | 6.49766034  | 3.51449E-08 |
| TUBB2B    | -0.368678214 | 6.993724173 | 3.52856E-08 |
| RNF150    | 0.391294644  | 10.45502061 | 3.5754E-08  |
| KBTBD5    | -0.693082666 | 6.4061514   | 3.5898E-08  |
| PHF21A    | 0.253477852  | 9.663837165 | 3.60625E-08 |
| CP110     | 0.238642723  | 8.321108823 | 3.62986E-08 |
| EDA2R     | 0.158036732  | 6.137200089 | 3.64678E-08 |
| CNOT6     | -0.204851111 | 7.650044965 | 3.65454E-08 |
| KRTCAP2   | -0.24839952  | 10.93741548 | 3.66144E-08 |
| ZNF385D   | -0.333771033 | 7.012127319 | 3.66489E-08 |
| LEPREL1   | 0.980876795  | 8.583054668 | 3.67858E-08 |
| RBM16     | 0.201780425  | 7.4304962   | 3.69464E-08 |
| DGAT1     | -0.220150384 | 7.653651028 | 3.71874E-08 |
| KCTD15    | -0.181469218 | 6.765885564 | 3.72496E-08 |
| PDE1A     | 0.542775291  | 7.898534149 | 3.73793E-08 |
| KLHL21    | 0.379930592  | 8.169527132 | 3.7524E-08  |
| PPAN      | -0.279932409 | 6.914151262 | 3.76522E-08 |
| CRADD     | 0.342261229  | 9.937357697 | 3.79273E-08 |
| PDIA6     | -0.364181917 | 8.147787442 | 3.80402E-08 |
| RALGDS    | -0.479110295 | 8.989380637 | 3.83813E-08 |
| FLVCR2    | -0.270119019 | 6.861771962 | 3.84847E-08 |
| ROD1      | -0.276654513 | 8.810959005 | 3.85292E-08 |
| DDX56     | -0.243410092 | 8.302090795 | 3.88052E-08 |
| LOC400214 | 0.178868913  | 6.408931538 | 3.88516E-08 |
| ZNF701    | 0.196689463  | 6.572037164 | 3.88746E-08 |
| SLC25A38  | 0.276462781  | 7.515363196 | 3.90485E-08 |
| C20ORF54  | -0.189868516 | 6.424022532 | 3.91548E-08 |
| KRBA2     | -0.269740315 | 6.495058029 | 3.93077E-08 |
| ACSL5     | -0.18103126  | 6.812384951 | 3.94539E-08 |
| RBMS1     | -0.237790673 | 8.274215042 | 4.00708E-08 |
| NT5C3     | 0.252003007  | 8.600337584 | 4.01277E-08 |
| LACTB     | -0.28157423  | 8.205912831 | 4.03624E-08 |
| PHKB      | 0.218674464  | 8.340932503 | 4.08499E-08 |
| PTPRU     | -0.228155618 | 6.276012493 | 4.14968E-08 |
| TBC1D2    | -0.183789525 | 6.467393364 | 4.16684E-08 |
| SOBP      | 0.210807456  | 7.464802554 | 4.17335E-08 |
| IL20RA    | -0.197648418 | 6.355189463 | 4.17566E-08 |
| NOS3      | -0.492449966 | 7.881295983 | 4.17811E-08 |
| SEMA3F    | -0.281042282 | 6.777844097 | 4.19569E-08 |

DEG.infomation

|           |              |             |             |
|-----------|--------------|-------------|-------------|
| RGS16     | -0.177744556 | 6.270133101 | 4.25166E-08 |
| SH3PXD2B  | -0.277804281 | 6.397640339 | 4.26243E-08 |
| IFT122    | -0.194693013 | 6.795109411 | 4.26907E-08 |
| HIF1A     | -0.31157114  | 7.339507798 | 4.28267E-08 |
| ARID4A    | 0.150485656  | 6.795135722 | 4.29369E-08 |
| RNF14     | 0.234329509  | 9.270219424 | 4.29962E-08 |
| UBE2L6    | -0.38079985  | 8.328810469 | 4.31019E-08 |
| MYOCD     | 0.194891901  | 6.560580592 | 4.31632E-08 |
| CBY1      | 0.275138277  | 8.095368649 | 4.34857E-08 |
| KBTBD10   | -0.402678492 | 10.45685799 | 4.36829E-08 |
| LOC651302 | 0.291977676  | 7.091637339 | 4.38519E-08 |
| NCAPD3    | 0.227864894  | 6.870135782 | 4.44194E-08 |
| NIPSNAP1  | 0.323748566  | 7.890292275 | 4.44715E-08 |
| SLCO5A1   | -0.370436942 | 6.850697633 | 4.48407E-08 |
| RPS6KA1   | -0.159912352 | 6.204395915 | 4.50585E-08 |
| ECE2      | -0.199354286 | 6.201583532 | 4.58513E-08 |
| TPR       | 0.404325228  | 8.619877884 | 4.59445E-08 |
| DNAJC18   | 0.169298753  | 6.915549532 | 4.61186E-08 |
| SRP14P1   | 0.216551775  | 11.43625262 | 4.65549E-08 |
| B3GALTL   | 0.468746598  | 8.26758341  | 4.67315E-08 |
| MED22     | -0.245558004 | 8.54236567  | 4.69822E-08 |
| CIP29     | 0.203848744  | 10.9700213  | 4.7693E-08  |
| PTGES     | -0.231874197 | 6.208359738 | 4.78765E-08 |
| SLC22A4   | -0.293092367 | 6.529073602 | 4.93216E-08 |
| LOC150763 | -0.120781957 | 6.531528788 | 4.9665E-08  |
| SMAD9     | 0.220380953  | 6.420393619 | 4.99329E-08 |
| JAZF1     | 0.311908677  | 8.800456823 | 5.00879E-08 |
| TXLNB     | 0.483479732  | 7.014502681 | 5.03454E-08 |
| TATDN3    | 0.264710766  | 8.465550471 | 5.17338E-08 |
| NECAB1    | 0.182605286  | 6.399993296 | 5.1738E-08  |
| DENND2D   | -0.177821468 | 6.256914708 | 5.18896E-08 |
| POLR3D    | -0.22729894  | 6.493877138 | 5.25292E-08 |
| YIF1B     | -0.21846422  | 7.660045685 | 5.30395E-08 |
| GUCY1A2   | -0.170077559 | 6.295250967 | 5.35655E-08 |
| TM4SF18   | -0.364375576 | 7.650543817 | 5.36095E-08 |
| COL23A1   | 0.422241056  | 7.943878727 | 5.37445E-08 |
| NOSTRIN   | -0.310666857 | 7.724843864 | 5.3798E-08  |
| TNNI3K    | 0.644932394  | 9.809525796 | 5.381E-08   |
| GPHN      | 0.21311012   | 7.484286291 | 5.38294E-08 |
| PRKCZ     | 0.192267697  | 6.974040789 | 5.39751E-08 |
| MPL       | 0.270393102  | 6.866260472 | 5.42593E-08 |
| UBE2Z     | -0.171036313 | 6.847837397 | 5.45595E-08 |
| TDRD6     | 0.279448212  | 6.962157693 | 5.4613E-08  |
| CYP11A1   | 0.171088643  | 6.733390777 | 5.53592E-08 |
| SRRM1L    | 0.221735338  | 7.415343024 | 5.5361E-08  |
| HERC1     | 0.256746121  | 8.960608854 | 5.54574E-08 |
| SLC7A8    | -0.131919292 | 6.338027672 | 5.63047E-08 |
| LOC650737 | 0.292835783  | 7.241567125 | 5.66211E-08 |
| TNIP1     | 0.26132199   | 9.094879346 | 5.69536E-08 |
| GPA33     | 0.199841272  | 6.601548019 | 5.70697E-08 |
| CACNB3    | -0.250996435 | 7.161609148 | 5.71552E-08 |

## DEG.infomation

|           |              |             |             |
|-----------|--------------|-------------|-------------|
| DSC1      | 0.528857319  | 7.228857185 | 5.71675E-08 |
| SRR       | 0.200463763  | 6.63903189  | 5.8325E-08  |
| KATNB1    | -0.226397626 | 7.654851445 | 5.86974E-08 |
| GYLTL1B   | 0.19996595   | 6.398071007 | 5.87293E-08 |
| ACOT7     | -0.231764398 | 6.881886383 | 5.92593E-08 |
| FIS1      | 0.283957986  | 10.7767839  | 5.96735E-08 |
| VPS29     | -0.275673649 | 10.70096543 | 5.99535E-08 |
| TLR8      | -0.126181548 | 6.094878135 | 6.0046E-08  |
| SPATA18   | 0.215523367  | 6.490043782 | 6.04322E-08 |
| KIAA1009  | 0.154504233  | 6.64992299  | 6.06326E-08 |
| RORC      | 0.2603172    | 6.606729991 | 6.06518E-08 |
| CABC1     | -0.43316483  | 10.99827564 | 6.10341E-08 |
| PDE4B     | -0.247454023 | 6.432086695 | 6.11038E-08 |
| SCRIB     | -0.158566305 | 7.725226523 | 6.12929E-08 |
| MARK1     | 0.211288414  | 7.826153893 | 6.14179E-08 |
| JTV1      | -0.228964274 | 10.513919   | 6.21333E-08 |
| CSPG4     | -0.333297008 | 7.512769573 | 6.2452E-08  |
| M6PR      | -0.249577367 | 8.935034858 | 6.29959E-08 |
| BEX5      | -0.194641172 | 6.25904453  | 6.3021E-08  |
| FLJ20125  | 0.275530081  | 7.22276383  | 6.34422E-08 |
| LOC285074 | 0.257981643  | 7.931241234 | 6.34845E-08 |
| P704P     | -0.315387408 | 6.504862881 | 6.40795E-08 |
| C10ORF57  | 0.202844153  | 7.264191012 | 6.43678E-08 |
| ARHGDI1   | -0.359576016 | 11.37401789 | 6.45796E-08 |
| FECH      | 0.278793646  | 7.381137355 | 6.46585E-08 |
| METTL1    | -0.248340548 | 6.410066626 | 6.49946E-08 |
| RNH1      | -0.261537873 | 8.888694208 | 6.57791E-08 |
| GRM8      | 0.245919589  | 6.532326225 | 6.67722E-08 |
| DNMT1     | -0.324507376 | 9.455923357 | 6.68543E-08 |
| SFRS5     | -0.370361486 | 10.51401441 | 6.77206E-08 |
| SH2B1     | 0.244685718  | 7.230098358 | 6.85161E-08 |
| SLC4A7    | -0.253345793 | 7.782857153 | 6.85245E-08 |
| PRICKLE2  | 0.296320405  | 8.334706593 | 6.86012E-08 |
| ADA       | -0.306086028 | 7.63597039  | 6.89551E-08 |
| BRF2      | 0.214872122  | 7.920081251 | 6.94084E-08 |
| HLA-C     | -0.272017901 | 6.639397437 | 7.0145E-08  |
| CCL21     | -0.479832101 | 6.721761092 | 7.02466E-08 |
| IDS       | 0.188522543  | 8.57607349  | 7.03589E-08 |
| SUV39H1   | -0.257981294 | 7.505014709 | 7.06588E-08 |
| TAGLN2    | -0.471562085 | 8.833417904 | 7.0836E-08  |
| FLJ10246  | -0.152781742 | 6.182568048 | 7.10224E-08 |
| UQCR      | 0.222995195  | 7.505417631 | 7.12774E-08 |
| WDR66     | 0.189612648  | 6.291324856 | 7.13681E-08 |
| MCOLN1    | -0.279727077 | 7.868730355 | 7.18357E-08 |
| DHX15     | -0.298565522 | 10.06775175 | 7.19655E-08 |
| LOC643452 | 0.170297154  | 7.315025099 | 7.19952E-08 |
| PIP4K2B   | 0.172226456  | 6.663159441 | 7.22472E-08 |
| ASB5      | 0.309477567  | 7.053747621 | 7.22963E-08 |
| GPR146    | 0.20613909   | 6.852923067 | 7.23733E-08 |
| CCDC90A   | 0.319415281  | 9.698303676 | 7.2606E-08  |
| CAMK2A    | 0.343174187  | 7.205800551 | 7.381E-08   |

## DEG.infomation

|           |              |             |             |
|-----------|--------------|-------------|-------------|
| MRPL46    | 0.288570681  | 10.53471053 | 7.49012E-08 |
| GCLM      | -0.245189819 | 7.101441456 | 7.52164E-08 |
| SLAMF1    | -0.188097281 | 6.046580036 | 7.56493E-08 |
| CEBPG     | -0.309890022 | 8.318543103 | 7.60768E-08 |
| SHPK      | -0.242311268 | 7.268956355 | 7.61583E-08 |
| SNORD68   | -0.227080605 | 6.740760476 | 7.7077E-08  |
| COPE      | -0.197507852 | 9.12976347  | 7.71648E-08 |
| OAF       | -0.393010768 | 8.653212716 | 7.72583E-08 |
| AP4B1     | 0.208948652  | 8.365190961 | 7.74374E-08 |
| TSPAN17   | -0.258571257 | 9.193797418 | 7.7839E-08  |
| XPR1      | 0.426067086  | 9.234009239 | 7.79173E-08 |
| ABCF1     | -0.263597043 | 9.141698642 | 7.79489E-08 |
| MAPK9     | -0.202700209 | 7.203951017 | 7.89799E-08 |
| MRPS27    | 0.226169976  | 9.567227026 | 7.9264E-08  |
| ZFR       | 0.325980217  | 9.618779384 | 7.92822E-08 |
| ZNF442    | 0.156874098  | 6.651013361 | 7.99698E-08 |
| PPP1R3D   | 0.223760147  | 7.306540032 | 8.02745E-08 |
| CCDC115   | 0.247570512  | 8.18155603  | 8.05033E-08 |
| SEC24D    | -0.304275636 | 6.92655012  | 8.0531E-08  |
| HDGF      | -0.218695745 | 9.011761425 | 8.07141E-08 |
| ZNF197    | 0.133203978  | 6.608164206 | 8.12339E-08 |
| SUGT1     | 0.262734055  | 8.127414601 | 8.16986E-08 |
| FOSL2     | -0.1698531   | 6.415563665 | 8.21507E-08 |
| CKAP2     | 0.282466474  | 6.946502224 | 8.23985E-08 |
| STARD13   | -0.157849716 | 7.152542807 | 8.25313E-08 |
| PECI      | 0.270235682  | 10.26445596 | 8.36302E-08 |
| ZNF717    | 0.165518314  | 6.324420215 | 8.40347E-08 |
| RALGPS1   | 0.316793063  | 7.863983058 | 8.41389E-08 |
| COMMD10   | 0.341020591  | 8.798731405 | 8.42613E-08 |
| FAM122B   | 0.191024777  | 7.513781656 | 8.46618E-08 |
| NUDT5     | -0.308498103 | 7.445031266 | 8.5089E-08  |
| GRINA     | -0.251958595 | 8.478679061 | 8.53553E-08 |
| ASCC2     | -0.394135611 | 10.02577035 | 8.55863E-08 |
| S100P     | -0.213581387 | 5.978845586 | 8.56821E-08 |
| CFH       | 0.560491762  | 7.826122687 | 8.58384E-08 |
| MAOB      | 0.444923396  | 9.029913417 | 8.59336E-08 |
| TRIM23    | 0.226560125  | 6.879860475 | 8.64352E-08 |
| MSN       | -0.477787486 | 10.53419217 | 8.68718E-08 |
| TTC23     | 0.163532158  | 7.246882808 | 8.71409E-08 |
| LOC731950 | 0.137019006  | 6.740416061 | 8.72326E-08 |
| C5ORF30   | 0.180551347  | 6.715538851 | 8.74888E-08 |
| NPTXR     | 0.160718058  | 6.619573992 | 8.79467E-08 |
| RPL34     | -0.3163904   | 7.958143498 | 8.81896E-08 |
| ZFP36L2   | -0.292343434 | 7.301716722 | 8.82584E-08 |
| COMMD6    | 0.282211405  | 10.5395371  | 8.85386E-08 |
| SLC16A5   | 0.339899087  | 7.694687943 | 8.8749E-08  |
| CCDC141   | 0.519782999  | 8.09003913  | 8.98493E-08 |
| PYGB      | 0.480330836  | 10.5061492  | 9.03319E-08 |
| SRPX      | -0.382743365 | 10.5329874  | 9.04675E-08 |
| LOC400027 | 0.273172181  | 9.924733337 | 9.15007E-08 |
| COPS4     | 0.300462382  | 9.680312016 | 9.17371E-08 |

## DEG.infomation

|           |              |             |             |
|-----------|--------------|-------------|-------------|
| RRP12     | -0.567071994 | 7.801004994 | 9.19166E-08 |
| ABHD10    | 0.351636906  | 8.139280875 | 9.20772E-08 |
| PPP1R1C   | 0.445355213  | 7.510178268 | 9.29458E-08 |
| VASN      | -0.393782918 | 8.229273548 | 9.32877E-08 |
| POGK      | -0.21937337  | 8.777916412 | 9.36306E-08 |
| LOC728452 | -0.217988083 | 6.427497742 | 9.44206E-08 |
| SMARCA2   | 0.345717131  | 9.229934746 | 9.51546E-08 |
| ENOX2     | 0.154515237  | 6.894262496 | 9.59471E-08 |
| ZNF10     | 0.204616715  | 7.10565574  | 9.62784E-08 |
| PRO0628   | -0.270810382 | 6.498419396 | 9.67569E-08 |
| LOC649049 | -0.389876887 | 11.27588904 | 9.70096E-08 |
| STK3      | -0.366832815 | 8.629635182 | 9.76211E-08 |
| SLC8A1    | 0.176216262  | 6.645989578 | 9.77471E-08 |
| LTBP3     | 0.251611553  | 7.488278246 | 9.80192E-08 |
| LOC728519 | -0.194073497 | 6.409420895 | 9.8469E-08  |
| CXCL6     | -0.239139653 | 6.153223661 | 9.90459E-08 |
| RPS6KB2   | -0.213895677 | 9.15415192  | 1.00448E-07 |
| TOMM40L   | 0.257828014  | 7.562440621 | 1.0052E-07  |
| C1ORF83   | 0.161105097  | 6.852219713 | 1.01249E-07 |
| LOC400890 | -0.206905499 | 8.279646681 | 1.01299E-07 |
| KIAA0240  | 0.233514446  | 8.811655032 | 1.01353E-07 |
| EFHD1     | 0.374396939  | 10.15777661 | 1.02006E-07 |
| C20ORF116 | -0.233165846 | 8.97337062  | 1.0215E-07  |
| HDC       | -0.273617739 | 6.309317251 | 1.02527E-07 |
| PEX19     | 0.235625783  | 8.367424553 | 1.03493E-07 |
| ZFP37     | 0.189516684  | 6.826920042 | 1.03616E-07 |
| JUND      | -0.34390784  | 12.25049876 | 1.03669E-07 |
| LOC145814 | 0.370677588  | 6.822975422 | 1.04264E-07 |
| WFDC3     | 0.116326157  | 6.282533312 | 1.05441E-07 |
| MYNN      | 0.175132064  | 7.173695881 | 1.06086E-07 |
| ADAMTS5   | -0.300297084 | 6.40039788  | 1.06738E-07 |
| LONP2     | 0.163287981  | 8.262525332 | 1.07203E-07 |
| ZNF610    | 0.176393091  | 6.187331156 | 1.07353E-07 |
| CEP68     | 0.257987877  | 7.065768425 | 1.08024E-07 |
| C6ORF162  | 0.200584391  | 6.953751395 | 1.08328E-07 |
| ZNF175    | 0.177978592  | 7.156680067 | 1.1015E-07  |
| DAZAP1    | -0.396200086 | 7.534918207 | 1.10402E-07 |
| LILRB4    | -0.123884527 | 6.191456821 | 1.10513E-07 |
| ZNF271    | 0.201776251  | 8.002925684 | 1.11522E-07 |
| CTNND2    | 0.266115813  | 6.811797895 | 1.11649E-07 |
| C7ORF54   | -0.226195517 | 6.883998908 | 1.11865E-07 |
| TIMP2     | 0.323681053  | 9.132835893 | 1.12089E-07 |
| LOC645378 | 0.193557417  | 6.628095266 | 1.12611E-07 |
| LIPA      | -0.30786625  | 8.818145075 | 1.1268E-07  |
| NRM       | -0.189784455 | 6.352689098 | 1.12685E-07 |
| RAB4B     | -0.169816554 | 7.123286705 | 1.13216E-07 |
| AGPAT1    | 0.187040841  | 6.758164383 | 1.14195E-07 |
| TPST2     | -0.311070825 | 8.85396205  | 1.14682E-07 |
| C22ORF40  | 0.155546367  | 6.687969213 | 1.15759E-07 |
| LOC653171 | -0.246179133 | 7.54992032  | 1.16218E-07 |
| RALBP1    | 0.226519218  | 8.514327755 | 1.17761E-07 |

## DEG.infomation

|           |              |             |             |
|-----------|--------------|-------------|-------------|
| SEH1L     | -0.214671174 | 6.990212867 | 1.18646E-07 |
| RPS2      | -0.473196734 | 11.96131927 | 1.19203E-07 |
| NVL       | 0.134145468  | 6.8741296   | 1.19777E-07 |
| POLR2C    | 0.294067302  | 8.793959598 | 1.19955E-07 |
| HSPC111   | -0.394412736 | 7.205006133 | 1.20118E-07 |
| RBM39     | 0.341624915  | 8.083168733 | 1.20375E-07 |
| ATP6V1D   | 0.250416081  | 11.54183927 | 1.20495E-07 |
| DYNC1H1   | 0.317716334  | 10.20857695 | 1.2055E-07  |
| DBT       | 0.247612855  | 9.28460252  | 1.20935E-07 |
| LOC646849 | 0.395525955  | 9.416994722 | 1.22687E-07 |
| MRPS16    | -0.271551718 | 9.308155535 | 1.22998E-07 |
| TK2       | 0.193383237  | 6.856565257 | 1.23929E-07 |
| VPS37C    | -0.323464864 | 10.32226451 | 1.25704E-07 |
| HDAC9     | 0.123465385  | 6.215372364 | 1.25924E-07 |
| CDC2L6    | 0.230357923  | 8.359061616 | 1.2647E-07  |
| SCRN3     | 0.199360776  | 6.838975209 | 1.26902E-07 |
| PPP2R3A   | 0.290623951  | 7.879300868 | 1.27128E-07 |
| LASP1     | -0.301136979 | 10.39181589 | 1.27142E-07 |
| LRG1      | -0.19035228  | 6.260377856 | 1.27333E-07 |
| MYST4     | 0.191247853  | 6.768896468 | 1.28E-07    |
| GABARAPL1 | -0.354682812 | 10.8839212  | 1.28569E-07 |
| PIN4      | 0.176625055  | 6.699841712 | 1.29477E-07 |
| RIC3      | 0.223184958  | 6.886041107 | 1.29702E-07 |
| NPM3      | -0.329093023 | 7.735932316 | 1.29731E-07 |
| RHPN2     | -0.252993205 | 6.833556214 | 1.3004E-07  |
| CRIP3     | 0.31818351   | 6.612209956 | 1.30206E-07 |
| HADH      | 0.4067285    | 12.49813917 | 1.31425E-07 |
| MYOM2     | 0.482763263  | 13.64135863 | 1.31514E-07 |
| CREB5     | 0.207945883  | 6.746028942 | 1.31929E-07 |
| EDN3      | 0.126942673  | 6.073207764 | 1.33018E-07 |
| GRAMD4    | -0.379413173 | 8.683167824 | 1.33208E-07 |
| C6ORF203  | 0.367259569  | 7.256990871 | 1.34312E-07 |
| CDC25B    | -0.192357964 | 6.853871321 | 1.34506E-07 |
| CYB5D2    | 0.279645055  | 7.994813863 | 1.34758E-07 |
| NCBP2     | -0.220759065 | 7.524522661 | 1.35954E-07 |
| CMYA5     | 0.309846642  | 13.1922424  | 1.36405E-07 |
| KIAA0232  | 0.253158295  | 7.344049604 | 1.37028E-07 |
| SIRT4     | 0.261807522  | 7.585008011 | 1.40168E-07 |
| MTA2      | -0.25499117  | 7.575895548 | 1.42541E-07 |
| BAG3      | -0.421617918 | 11.41232545 | 1.44549E-07 |
| CPA3      | -0.312972015 | 6.51364895  | 1.44907E-07 |
| ZNF680    | 0.2930662    | 7.381164344 | 1.4584E-07  |
| C3ORF60   | 0.214334786  | 10.15483564 | 1.46798E-07 |
| DACT3     | 0.446106866  | 9.188715841 | 1.47777E-07 |
| FBXW5     | 0.21745189   | 8.006030628 | 1.47896E-07 |
| C1ORF2    | -0.194648296 | 7.581336976 | 1.48278E-07 |
| TTC12     | 0.20971167   | 6.503694562 | 1.49151E-07 |
| ZNF285A   | 0.218498974  | 7.487151673 | 1.50327E-07 |
| PIK3C2B   | 0.256387688  | 7.792198311 | 1.50509E-07 |
| F5        | -0.468229447 | 6.624886652 | 1.50627E-07 |
| OLFML3    | 0.391957838  | 7.642157839 | 1.5122E-07  |



## DEG.infomation

|           |              |             |             |
|-----------|--------------|-------------|-------------|
| MAD2L2    | -0.284166954 | 9.215952655 | 1.53408E-07 |
| GUCA1C    | 0.767261785  | 7.897708234 | 1.55339E-07 |
| ZNF224    | 0.164246014  | 6.789009842 | 1.55994E-07 |
| ADORA3    | -0.206122584 | 7.699909489 | 1.56585E-07 |
| FKRP      | 0.191550086  | 7.435953412 | 1.57032E-07 |
| DLD       | 0.424005308  | 10.64854238 | 1.58828E-07 |
| GFOD2     | -0.215990913 | 6.998152045 | 1.59101E-07 |
| MBOAT7    | -0.26012367  | 6.96957332  | 1.59787E-07 |
| DC2       | -0.383605784 | 9.054156425 | 1.60777E-07 |
| LYPD1     | 0.176574373  | 6.536560678 | 1.61508E-07 |
| OXA1L     | 0.312748993  | 9.907247073 | 1.61845E-07 |
| CECR6     | 0.21056587   | 6.688107352 | 1.62471E-07 |
| CCDC8     | 0.202452074  | 7.016405151 | 1.64218E-07 |
| TRPV2     | -0.26360884  | 6.921267003 | 1.67527E-07 |
| GPIHBP1   | -0.424324209 | 7.364609084 | 1.67908E-07 |
| TMEM135   | 0.272154566  | 7.043137037 | 1.68006E-07 |
| GAL       | -0.311413049 | 6.075850055 | 1.68349E-07 |
| PHF5A     | 0.285553586  | 8.633347893 | 1.68568E-07 |
| IRF2BP1   | 0.201970701  | 6.972667787 | 1.69938E-07 |
| KLF15     | -0.331326078 | 7.972686752 | 1.70046E-07 |
| LGALS8    | 0.284626004  | 8.908741873 | 1.71865E-07 |
| CSNK2A2   | 0.229864546  | 9.269702098 | 1.72326E-07 |
| CD69      | -0.140898506 | 6.125455382 | 1.72458E-07 |
| C11ORF31  | 0.140550514  | 6.49194113  | 1.73179E-07 |
| PLGLB1    | 0.16579789   | 6.426039621 | 1.74881E-07 |
| ANTXR1    | 0.335020393  | 8.365574573 | 1.7519E-07  |
| ABHD2     | -0.251972418 | 6.619926588 | 1.75332E-07 |
| GNA11     | -0.309707129 | 9.36525356  | 1.7849E-07  |
| NIPBL     | 0.143747899  | 7.47292144  | 1.80721E-07 |
| ARIH2     | 0.346873696  | 10.23938732 | 1.80997E-07 |
| CETN2     | 0.249233278  | 10.75635785 | 1.88764E-07 |
| FASTKD1   | 0.316948544  | 8.728016314 | 1.89445E-07 |
| FGD6      | 0.217974283  | 6.729188514 | 1.90354E-07 |
| HLA-DRA   | -0.488886748 | 10.59682585 | 1.90559E-07 |
| MSC       | -0.310594243 | 6.784680032 | 1.90864E-07 |
| AP2B1     | 0.209057919  | 7.068084497 | 1.92205E-07 |
| APOL3     | -0.242849417 | 7.004904322 | 1.92701E-07 |
| ANGPTL4   | -0.497220084 | 6.472881133 | 1.92986E-07 |
| C12ORF62  | 0.306557235  | 10.25514035 | 1.94019E-07 |
| SCOC      | 0.275252128  | 9.26803297  | 1.94582E-07 |
| FEM1C     | -0.310043941 | 9.85565606  | 1.99433E-07 |
| TRK1      | -0.402601304 | 6.48754254  | 1.99742E-07 |
| MAP4K3    | 0.244525095  | 7.513033119 | 2.00528E-07 |
| GGNBP2    | 0.199709092  | 9.360736625 | 2.03803E-07 |
| DOLPP1    | -0.162756581 | 7.157563    | 2.04325E-07 |
| CYBRD1    | 0.376545055  | 9.822389856 | 2.04702E-07 |
| WBSCR18   | 0.267531846  | 7.357516072 | 2.05584E-07 |
| TBC1D15   | 0.206984789  | 8.606899564 | 2.12663E-07 |
| LOC147804 | 0.819519496  | 7.440059617 | 2.15177E-07 |
| TTC30A    | 0.19896326   | 6.790197161 | 2.1713E-07  |
| POPDC2    | -0.313487712 | 10.94815553 | 2.19216E-07 |

## DEG.infomation

|           |              |             |             |
|-----------|--------------|-------------|-------------|
| SRGAP3    | 0.232468475  | 6.847607058 | 2.19376E-07 |
| STRA13    | -0.274256175 | 9.013767315 | 2.19663E-07 |
| LOC641705 | 0.253073934  | 6.948062427 | 2.22036E-07 |
| MANBA     | 0.286747743  | 8.114242856 | 2.25635E-07 |
| HSPC171   | -0.247139389 | 7.809371672 | 2.25762E-07 |
| CARHSP1   | -0.350180197 | 9.183797908 | 2.26543E-07 |
| SSR2      | -0.224470227 | 7.645118404 | 2.2749E-07  |
| HIPK2     | -0.593682467 | 9.024136541 | 2.29626E-07 |
| MRGPRF    | -0.2031528   | 6.544097951 | 2.30721E-07 |
| NCKAP1L   | -0.265869537 | 6.307669139 | 2.33844E-07 |
| MRPS33    | 0.256668036  | 9.660945935 | 2.34849E-07 |
| PODN      | 0.446627484  | 8.874463758 | 2.35419E-07 |
| IER5      | 0.373637844  | 8.343922358 | 2.37313E-07 |
| GAB3      | 0.3061441    | 7.293764118 | 2.38479E-07 |
| ASB15     | 0.397809948  | 7.285984879 | 2.38968E-07 |
| SPAG11A   | -0.131465084 | 6.32806269  | 2.40283E-07 |
| EP400     | 0.182205258  | 8.263004562 | 2.41152E-07 |
| HIST1H4C  | 0.31087619   | 11.53665297 | 2.42473E-07 |
| C17ORF90  | 0.183896183  | 8.614095374 | 2.43084E-07 |
| DDX24     | 0.288906373  | 10.15865716 | 2.4339E-07  |
| EEF2K     | -0.346289826 | 9.125664563 | 2.43552E-07 |
| APLP1     | 0.193394462  | 6.4174912   | 2.43679E-07 |
| ARMCX3    | 0.239111353  | 7.462269846 | 2.43953E-07 |
| IFT172    | 0.225835339  | 7.075970308 | 2.46311E-07 |
| TCFL5     | 0.259286446  | 7.453711929 | 2.47936E-07 |
| MAD2L1    | 0.132582122  | 6.306811226 | 2.50181E-07 |
| DCUN1D5   | -0.254929184 | 9.035352297 | 2.50854E-07 |
| NXNL1     | 0.259497358  | 6.732650746 | 2.51056E-07 |
| P2RX5     | -0.269725886 | 6.275885314 | 2.51441E-07 |
| CLPTM1L   | -0.337440746 | 8.98676618  | 2.52114E-07 |
| ZNF827    | 0.317262523  | 8.208622929 | 2.53072E-07 |
| LZIC      | 0.16928931   | 7.297066226 | 2.56508E-07 |
| NBN       | 0.147369625  | 7.197054998 | 2.56832E-07 |
| C1ORF35   | 0.192911338  | 7.411352157 | 2.59249E-07 |
| SNORA33   | -0.203816234 | 6.554196281 | 2.59899E-07 |
| SHMT1     | -0.138753636 | 6.834308455 | 2.60941E-07 |
| POMT1     | 0.156407791  | 7.395351555 | 2.61025E-07 |
| AFAP1L1   | 0.233327414  | 8.536690188 | 2.61756E-07 |
| SMCR7L    | -0.198728803 | 8.268956376 | 2.63009E-07 |
| WDR45     | 0.183905628  | 7.435474163 | 2.64283E-07 |
| MPHOSPH10 | 0.278412605  | 7.970157561 | 2.6558E-07  |
| DTX3      | 0.245666194  | 7.245466043 | 2.66979E-07 |
| ENPP5     | 0.247679713  | 6.768895552 | 2.67602E-07 |
| IL32      | -0.431804686 | 7.548461967 | 2.68179E-07 |
| FAM134B   | 0.463006404  | 10.18276844 | 2.69075E-07 |
| FAM100A   | -0.221062271 | 7.134228836 | 2.71144E-07 |
| FUT4      | -0.176838756 | 6.7527268   | 2.73384E-07 |
| PGA3      | -0.082404433 | 6.129414949 | 2.74214E-07 |
| C9ORF102  | 0.213886356  | 7.401045256 | 2.75498E-07 |
| ZNF704    | 0.16165029   | 6.597944747 | 2.83616E-07 |
| ACTR6     | 0.311567582  | 8.996894717 | 2.84079E-07 |

## DEG.infomation

|           |              |             |             |
|-----------|--------------|-------------|-------------|
| CCDC53    | 0.255019341  | 9.678952202 | 2.8486E-07  |
| CD38      | -0.211004961 | 6.070740458 | 2.88614E-07 |
| ARHGAP19  | 0.18399111   | 7.109397216 | 2.88825E-07 |
| C17ORF87  | -0.166144615 | 6.188051096 | 2.8894E-07  |
| CFB       | -0.512961409 | 6.966312687 | 2.90901E-07 |
| C2ORF76   | 0.193636537  | 6.886830712 | 2.91136E-07 |
| MAP2      | 0.13582931   | 6.291556943 | 2.91267E-07 |
| ZFP30     | 0.193643225  | 6.419515124 | 2.91919E-07 |
| PDIA5     | -0.231243801 | 7.01474563  | 2.92787E-07 |
| RAMP3     | -0.324287855 | 7.82301304  | 2.9542E-07  |
| PHC1      | 0.181256826  | 7.139106632 | 2.96802E-07 |
| MRPL49    | 0.194027553  | 7.68292146  | 2.96811E-07 |
| USP48     | 0.129489255  | 7.008154546 | 2.96933E-07 |
| SGSM1     | 0.356520816  | 7.865359059 | 2.97442E-07 |
| LOC441268 | -0.182149446 | 6.248298899 | 2.98618E-07 |
| PCBD2     | 0.247399137  | 7.3822402   | 2.99678E-07 |
| WDR5      | -0.126156879 | 6.770084249 | 3.00181E-07 |
| NSF       | -0.19996906  | 7.987820481 | 3.06737E-07 |
| C18ORF10  | 0.187317286  | 7.619084479 | 3.06927E-07 |
| PDHB      | 0.27729412   | 12.56083176 | 3.07238E-07 |
| TCTEX1D1  | -0.2119428   | 6.911527771 | 3.10625E-07 |
| SEC31A    | 0.307257091  | 9.247903479 | 3.13819E-07 |
| QTRT1     | -0.249290119 | 6.818166372 | 3.14011E-07 |
| USP28     | 0.228035341  | 6.826739217 | 3.16856E-07 |
| PTPN14    | 0.192592677  | 6.702315495 | 3.17508E-07 |
| ADAT3     | -0.17158604  | 6.289931242 | 3.18243E-07 |
| PARVA     | -0.228922143 | 7.350246221 | 3.1943E-07  |
| TFRC      | -0.688439975 | 10.61377384 | 3.19698E-07 |
| FBXL14    | 0.161277754  | 6.290329403 | 3.21011E-07 |
| ATF6      | -0.284579709 | 8.523643288 | 3.22591E-07 |
| NOPE      | -0.170205294 | 6.416699207 | 3.24315E-07 |
| ADCK2     | -0.253333359 | 7.81484891  | 3.25308E-07 |
| PRMT1     | -0.300726893 | 9.326319841 | 3.27115E-07 |
| WWC2      | 0.173048584  | 6.687777207 | 3.27169E-07 |
| GPS2      | -0.269687523 | 8.328577754 | 3.29923E-07 |
| PER1      | -0.294952156 | 6.361781995 | 3.29926E-07 |
| ADD1      | -0.180980509 | 10.75588816 | 3.30774E-07 |
| MGA       | 0.151068293  | 6.801624247 | 3.31233E-07 |
| BZRAP1    | 0.254826607  | 6.880907024 | 3.31245E-07 |
| C17ORF80  | 0.236320281  | 7.233344824 | 3.31849E-07 |
| PPP1R10   | 0.317119142  | 7.388464333 | 3.31943E-07 |
| CRY2      | 0.421896613  | 8.962694418 | 3.32013E-07 |
| ADRA1B    | -0.289364962 | 7.069485025 | 3.32804E-07 |
| CMTM3     | -0.207190658 | 7.393984711 | 3.33075E-07 |
| NEBL      | 0.345383709  | 9.70901722  | 3.35346E-07 |
| GNG11     | 0.419501222  | 10.82742865 | 3.35505E-07 |
| PARP11    | 0.116877336  | 6.508262624 | 3.36794E-07 |
| NUB1      | 0.213297268  | 8.463347777 | 3.36967E-07 |
| TNFSF13B  | -0.291816277 | 6.849197064 | 3.37941E-07 |
| CHRAC1    | -0.164732264 | 7.064836983 | 3.38925E-07 |
| ADH5      | 0.417273609  | 7.219504077 | 3.39164E-07 |

## DEG.infomation

|           |              |             |             |
|-----------|--------------|-------------|-------------|
| DBI       | 0.257926914  | 11.48767436 | 3.39958E-07 |
| ACAD11    | 0.30078052   | 9.555355242 | 3.41384E-07 |
| GOLPH4    | 0.379857466  | 9.011101534 | 3.43373E-07 |
| FAM48A    | 0.110599146  | 6.576538904 | 3.44059E-07 |
| LOC57228  | -0.154749951 | 6.422177401 | 3.45003E-07 |
| APEX1     | -0.251315927 | 9.549693178 | 3.45407E-07 |
| ELK1      | -0.293871334 | 8.536810543 | 3.46721E-07 |
| LOC653566 | -0.304374962 | 9.083769615 | 3.47292E-07 |
| GIMAP5    | -0.343084437 | 7.769696085 | 3.5186E-07  |
| GAP43     | -0.294051665 | 6.419689901 | 3.52778E-07 |
| NENF      | 0.243438294  | 11.71496468 | 3.55662E-07 |
| RBP1      | -0.361047342 | 8.21208564  | 3.57255E-07 |
| LOC731878 | -0.286360329 | 8.365484084 | 3.57419E-07 |
| SH3PXD2A  | 0.274743711  | 10.55185164 | 3.59532E-07 |
| ANO5      | 0.197411715  | 6.461835787 | 3.59617E-07 |
| SLC4A4    | 0.166627718  | 6.758870657 | 3.60051E-07 |
| CHN2      | 0.354761093  | 8.040484674 | 3.60519E-07 |
| TIGD7     | 0.237832778  | 7.873013271 | 3.62772E-07 |
| SEPT5     | 0.437541192  | 9.365072197 | 3.669E-07   |
| RBM4B     | 0.199174823  | 8.078636901 | 3.67129E-07 |
| CHST14    | 0.196216318  | 7.174341583 | 3.67138E-07 |
| C9ORF103  | 0.265578046  | 7.983188398 | 3.72399E-07 |
| TPRG1L    | 0.284491035  | 10.63799394 | 3.74844E-07 |
| RABL3     | 0.259880249  | 7.332236929 | 3.77365E-07 |
| BTD       | 0.153925809  | 6.915106498 | 3.7786E-07  |
| PLAC9     | -0.404517077 | 9.623082531 | 3.81658E-07 |
| LOC644590 | 0.277633478  | 7.188121223 | 3.82283E-07 |
| RAI1      | -0.235451528 | 7.855838022 | 3.82567E-07 |
| SLC25A1   | -0.255006373 | 7.690664642 | 3.84918E-07 |
| WDR34     | 0.285222225  | 8.176310849 | 3.85315E-07 |
| STK10     | -0.179912633 | 6.540281687 | 3.8586E-07  |
| FOXO3     | -0.285179895 | 9.17233624  | 3.87707E-07 |
| CCNL1     | -0.201856938 | 7.48720963  | 3.87804E-07 |
| FNBP1     | -0.205979512 | 9.615888951 | 3.90949E-07 |
| C18ORF22  | 0.172076937  | 6.986776342 | 3.94076E-07 |
| GNAI2     | -0.257326466 | 9.996329429 | 3.95425E-07 |
| CDC7      | -0.1937569   | 6.243648611 | 3.97874E-07 |
| FXYP1     | 0.37240626   | 8.76375603  | 3.9811E-07  |
| C6ORF48   | 0.249789462  | 8.996534216 | 3.98322E-07 |
| ZNF667    | 0.134530031  | 6.528027579 | 3.99275E-07 |
| MAD1L1    | -0.151152632 | 6.490998068 | 4.02166E-07 |
| TRQ1      | -0.217950675 | 6.244207313 | 4.03003E-07 |
| DDX42     | 0.189584862  | 8.580069129 | 4.21052E-07 |
| EIF3I     | -0.311958979 | 10.04889937 | 4.23462E-07 |
| HSD17B14  | 0.276791903  | 6.559411685 | 4.25283E-07 |
| PPP1CB    | 0.262932827  | 9.624405723 | 4.2819E-07  |
| HDDC2     | 0.235204282  | 11.58737691 | 4.31085E-07 |
| NSMCE4A   | 0.235980808  | 9.842291866 | 4.31198E-07 |
| CTSL1     | -0.221250409 | 10.92994972 | 4.34365E-07 |
| TAX1BP1   | 0.191679317  | 11.51144945 | 4.36154E-07 |
| SRD5A2L2  | 0.388866684  | 12.53721582 | 4.38126E-07 |

## DEG.infomation

|           |              |             |             |
|-----------|--------------|-------------|-------------|
| PIGW      | -0.145898506 | 6.344623025 | 4.39348E-07 |
| SEPT8     | 0.16099616   | 6.404616473 | 4.40604E-07 |
| IFI35     | -0.329946286 | 7.958865057 | 4.4195E-07  |
| TACC1     | -0.273714756 | 11.27138995 | 4.44852E-07 |
| CXORF23   | 0.185165936  | 6.491798272 | 4.46326E-07 |
| DOCK9     | -0.291582931 | 6.870710856 | 4.4761E-07  |
| TWSG1     | 0.274635008  | 8.387715214 | 4.50252E-07 |
| CHAC2     | -0.194157043 | 6.143187563 | 4.50485E-07 |
| COR07     | -0.166384933 | 6.876145422 | 4.52894E-07 |
| CALB2     | -0.11596904  | 6.243502718 | 4.57023E-07 |
| ZNF439    | 0.187519427  | 7.130579109 | 4.58207E-07 |
| C1ORF149  | 0.21034714   | 7.362649953 | 4.59725E-07 |
| ZBTB43    | -0.28533628  | 8.522719616 | 4.60163E-07 |
| SYT17     | 0.150538305  | 6.199295966 | 4.60736E-07 |
| EGLN1     | -0.2691615   | 7.408247983 | 4.63415E-07 |
| SNRK      | 0.245922843  | 9.184961995 | 4.65423E-07 |
| MESP1     | 0.360543072  | 7.400887999 | 4.65935E-07 |
| CCL19     | -0.376592074 | 6.598529578 | 4.72299E-07 |
| WBSCR22   | -0.252921626 | 9.522417278 | 4.73288E-07 |
| TMEM9     | 0.212674366  | 7.809071618 | 4.73625E-07 |
| PSAP      | -0.202661258 | 13.1486324  | 4.73721E-07 |
| CAMP      | -0.186425177 | 6.098205337 | 4.7401E-07  |
| HIRIP3    | 0.230839324  | 8.912124568 | 4.75432E-07 |
| VASH2     | -0.1992821   | 6.098465686 | 4.81389E-07 |
| EPN2      | -0.169254718 | 7.147287041 | 4.83796E-07 |
| LSM12     | -0.155997403 | 7.254177766 | 4.89915E-07 |
| KIAA1754  | -0.373336584 | 9.668613281 | 4.9289E-07  |
| C1ORF74   | 0.241610988  | 6.924367526 | 4.94044E-07 |
| SHISA3    | -0.35127655  | 6.661244652 | 4.95591E-07 |
| RAD21     | 0.431630587  | 9.023139462 | 4.95843E-07 |
| LAMC2     | -0.212294923 | 6.386100203 | 4.97369E-07 |
| IRF2BP2   | 0.291615888  | 8.107509385 | 4.97982E-07 |
| LOC151579 | -0.313429976 | 8.458410324 | 5.01139E-07 |
| ZDHHC16   | -0.274341767 | 8.671721869 | 5.05233E-07 |
| C16ORF79  | 0.232343713  | 7.165094593 | 5.0718E-07  |
| CLDN15    | -0.137441156 | 6.462595598 | 5.0831E-07  |
| MEOX2     | 0.407076657  | 6.922497005 | 5.13405E-07 |
| PAQR4     | -0.304514881 | 7.699176726 | 5.16004E-07 |
| PHF1      | 0.211703949  | 7.451888182 | 5.17527E-07 |
| RTN1      | -0.101662088 | 6.206041592 | 5.20679E-07 |
| MUTED     | 0.141575418  | 7.380041758 | 5.21749E-07 |
| YAF2      | 0.180711158  | 7.941132347 | 5.22271E-07 |
| ZNF226    | 0.220661534  | 7.025968363 | 5.24776E-07 |
| C11ORF75  | -0.465649654 | 8.447178671 | 5.28718E-07 |
| PRPF19    | -0.234015438 | 7.957813191 | 5.29205E-07 |
| HEXB      | 0.284348052  | 11.41880248 | 5.30522E-07 |
| TMEM18    | 0.137804341  | 6.659458238 | 5.32866E-07 |
| JUB       | 0.159945344  | 6.263216579 | 5.34446E-07 |
| ARG2      | -0.459550191 | 6.579342288 | 5.35874E-07 |
| LOC728411 | -0.193612441 | 6.391028367 | 5.37195E-07 |
| CYP46A1   | 0.292577786  | 7.217230812 | 5.40577E-07 |

## DEG.infomation

|           |              |             |             |
|-----------|--------------|-------------|-------------|
| ITGAE     | 0.296454133  | 8.639875158 | 5.40764E-07 |
| LOC652624 | -0.348320231 | 11.38374015 | 5.44217E-07 |
| SIAH2     | 0.24444068   | 7.604887093 | 5.44904E-07 |
| SECISBP2  | -0.210786041 | 7.887351017 | 5.47207E-07 |
| PTGFRN    | 0.381617905  | 9.039526924 | 5.49661E-07 |
| TMEM120B  | -0.110049544 | 6.138969276 | 5.51707E-07 |
| EIF3A     | 0.322552271  | 9.957501734 | 5.53901E-07 |
| C22ORF13  | -0.250378316 | 10.81456052 | 5.55728E-07 |
| C11ORF52  | -0.219448943 | 6.212214357 | 5.58575E-07 |
| C2ORF30   | 0.228013173  | 9.549564682 | 5.59632E-07 |
| CEP63     | 0.164079298  | 7.534267118 | 5.61925E-07 |
| NID1      | -0.228704656 | 6.735745532 | 5.62973E-07 |
| ECE1      | -0.153317831 | 6.389094136 | 5.63405E-07 |
| HSPA12A   | -0.180547132 | 7.303107946 | 5.70813E-07 |
| IL12A     | -0.175299725 | 6.286948631 | 5.7159E-07  |
| CDC42SE1  | -0.150821182 | 6.90729321  | 5.72421E-07 |
| TRA2A     | -0.244604673 | 7.731971979 | 5.73304E-07 |
| DUSP2     | -0.218128886 | 6.349056226 | 5.74312E-07 |
| E2F3      | -0.236498972 | 8.535554875 | 5.76711E-07 |
| FLJ39827  | -0.293710782 | 7.448286878 | 5.78874E-07 |
| OXR1      | 0.349620755  | 9.796041041 | 5.8034E-07  |
| RPSA      | -0.321805483 | 11.7554484  | 5.80572E-07 |
| UNC93B1   | -0.20905089  | 6.784965004 | 5.80956E-07 |
| EVI5L     | -0.241198261 | 8.947859683 | 5.82423E-07 |
| C6ORF108  | 0.260720596  | 8.373509519 | 5.82497E-07 |
| SRPK3     | 0.34010236   | 8.431433188 | 5.85887E-07 |
| PLCXD1    | -0.462088484 | 6.869238762 | 5.86924E-07 |
| IRAK1BP1  | 0.152591663  | 6.666258325 | 5.87332E-07 |
| ADIPOR2   | -0.241255079 | 9.284555928 | 5.87718E-07 |
| PPAT      | -0.213332342 | 6.670869951 | 5.88841E-07 |
| ZNF408    | 0.148541878  | 6.514236605 | 5.89695E-07 |
| KLHL7     | 0.390729554  | 8.749421201 | 5.91529E-07 |
| CAMLG     | 0.250505244  | 10.81586757 | 5.93229E-07 |
| SNRPC     | 0.215349957  | 9.412542726 | 5.96431E-07 |
| UBIAD1    | -0.285046266 | 7.257616368 | 6.00159E-07 |
| SNAPC2    | -0.181871425 | 7.600016109 | 6.00938E-07 |
| ANKRD39   | 0.213551377  | 7.958841261 | 6.01408E-07 |
| APEG1     | 0.22980935   | 7.260304516 | 6.0252E-07  |
| ZNF484    | 0.113720616  | 6.798966181 | 6.04529E-07 |
| ANGPTL1   | 0.127598415  | 6.234879153 | 6.07471E-07 |
| EZH1      | 0.126977095  | 6.673031866 | 6.0942E-07  |
| RBBP6     | 0.149772447  | 6.87267879  | 6.1172E-07  |
| MNAT1     | 0.268971366  | 7.233834516 | 6.12935E-07 |
| SLIT2     | -0.294797294 | 7.42165866  | 6.15079E-07 |
| NRIP1     | -0.279788719 | 8.283272991 | 6.17291E-07 |
| CKAP5     | 0.206395919  | 9.213357216 | 6.18171E-07 |
| HSD3B7    | -0.203669139 | 6.604616137 | 6.20365E-07 |
| SCARB2    | -0.240924062 | 11.33064391 | 6.20452E-07 |
| EPHX2     | 0.473383737  | 8.086448518 | 6.20463E-07 |
| C7ORF49   | -0.187283927 | 7.394914652 | 6.22129E-07 |
| GNA13     | -0.250026014 | 7.915943931 | 6.23066E-07 |

## DEG.infomation

|                |              |             |             |
|----------------|--------------|-------------|-------------|
| C21ORF70       | -0.227193405 | 7.710029726 | 6.27281E-07 |
| VPS33B         | -0.164509758 | 7.071882116 | 6.33275E-07 |
| ZNF254         | 0.103603554  | 6.322592771 | 6.37461E-07 |
| TDG            | -0.300517876 | 8.750333761 | 6.38806E-07 |
| SLC39A8        | -0.196644595 | 6.343065181 | 6.40681E-07 |
| AGFG2          | -0.105559662 | 6.3731791   | 6.41259E-07 |
| NELF           | -0.235260445 | 7.390990786 | 6.41273E-07 |
| TRAPPC3        | -0.215897442 | 9.50451091  | 6.4145E-07  |
| ADCK5          | 0.155838137  | 6.805250024 | 6.44118E-07 |
| CHGB           | -0.380759433 | 6.594869468 | 6.50488E-07 |
| PCF11          | 0.249365842  | 7.52674493  | 6.53988E-07 |
| TRPC4AP        | -0.245302566 | 8.679415684 | 6.54075E-07 |
| POLR3B         | 0.184936437  | 8.331782379 | 6.54279E-07 |
| ADSS           | -0.233893621 | 7.446513289 | 6.63022E-07 |
| NAB1           | 0.253909555  | 8.352499387 | 6.63531E-07 |
| KIAA0649       | 0.242654184  | 7.496663917 | 6.64803E-07 |
| LSAMP          | -0.515958036 | 7.151256389 | 6.70339E-07 |
| CHFR           | -0.248139368 | 8.71628889  | 6.80434E-07 |
| SLC46A3        | 0.264828735  | 8.515683766 | 6.8275E-07  |
| STAG2          | 0.154631345  | 7.073432397 | 6.87792E-07 |
| FLJ12684       | 0.310450589  | 6.90957084  | 6.92505E-07 |
| SCGN           | -0.272350241 | 6.305174647 | 7.01452E-07 |
| DHX9           | -0.120632593 | 6.582700809 | 7.05375E-07 |
| RBM41          | 0.117252871  | 6.518509784 | 7.06293E-07 |
| PDLIM1         | 0.264631084  | 11.21659992 | 7.12452E-07 |
| E2F5           | -0.236721544 | 6.858082674 | 7.16047E-07 |
| CAPRIN2        | 0.202292332  | 7.748694304 | 7.16352E-07 |
| NOTCH1         | -0.312343635 | 8.867259531 | 7.1641E-07  |
| IKBKAP         | 0.107378205  | 6.442555085 | 7.16542E-07 |
| ATP5L          | 0.256781737  | 12.53013992 | 7.17025E-07 |
| EBNA1BP2       | -0.317240098 | 10.06247719 | 7.21347E-07 |
| ERF            | -0.202029346 | 7.251792405 | 7.21413E-07 |
| MYBPHL         | -0.15575795  | 6.055695213 | 7.22398E-07 |
| C19ORF42       | 0.264738844  | 8.093397261 | 7.27591E-07 |
| GPN2           | -0.232675263 | 8.749637299 | 7.29007E-07 |
| TMEM189-UBE2V1 | -0.215016011 | 6.80056136  | 7.32355E-07 |
| CBLB           | -0.339098323 | 9.34668647  | 7.35024E-07 |
| C21ORF2        | -0.178884556 | 8.027315173 | 7.37603E-07 |
| TXNDC4         | 0.124450968  | 6.472716368 | 7.38468E-07 |
| C20ORF149      | 0.349438458  | 7.865564437 | 7.39879E-07 |
| MCCC1          | 0.285163627  | 9.70049059  | 7.47729E-07 |
| FGFR10P        | 0.151317184  | 6.878455035 | 7.53719E-07 |
| RUNX3          | -0.139929999 | 6.417895976 | 7.56121E-07 |
| ZNF256         | 0.193214095  | 7.868468756 | 7.6058E-07  |
| PDGFD          | 0.280299756  | 7.840578441 | 7.62051E-07 |
| METTL5         | 0.255477406  | 9.871465992 | 7.62553E-07 |
| SH3RF2         | 0.541917515  | 12.11424289 | 7.67908E-07 |
| EDF1           | 0.1732932    | 11.305374   | 7.71124E-07 |
| C10ORF137      | 0.209228428  | 7.813841432 | 7.74438E-07 |
| FRY            | 0.357355145  | 7.718706159 | 7.78009E-07 |
| BRP44          | 0.223148187  | 11.278825   | 7.79513E-07 |

## DEG.infomation

|           |              |             |             |
|-----------|--------------|-------------|-------------|
| TNFAIP1   | -0.292020892 | 8.339681402 | 7.82713E-07 |
| ATP5S     | 0.325713356  | 8.417289655 | 7.88137E-07 |
| TMCC1     | 0.175995862  | 6.636948149 | 7.94532E-07 |
| FLJ41603  | 0.308988     | 8.216600182 | 7.98651E-07 |
| FGF18     | 0.603291829  | 8.000333034 | 7.98866E-07 |
| VCP       | -0.236641512 | 10.33334531 | 7.98869E-07 |
| GABBR2    | -0.255215853 | 6.23827189  | 8.00994E-07 |
| METAP2    | 0.209772762  | 10.49870381 | 8.01068E-07 |
| CPD       | -0.269301559 | 8.762908858 | 8.01521E-07 |
| ZFH3      | -0.26311335  | 7.936470757 | 8.04169E-07 |
| LOC653972 | 0.292550872  | 7.061639572 | 8.12274E-07 |
| XIRP1     | -0.690556944 | 11.04011461 | 8.14139E-07 |
| C21ORF59  | 0.150356206  | 7.448319329 | 8.18236E-07 |
| GLUL      | -0.093172186 | 6.188114996 | 8.23583E-07 |
| PRELID1   | -0.384564588 | 7.970784562 | 8.29439E-07 |
| UHRF1     | -0.181440482 | 6.448530852 | 8.30181E-07 |
| RASSF5    | -0.177406517 | 6.60232663  | 8.36231E-07 |
| PDLIM5    | 0.384462066  | 11.52144732 | 8.48397E-07 |
| HVCN1     | -0.18705658  | 6.608638958 | 8.53232E-07 |
| SLC9A4    | 0.205185498  | 6.679687928 | 8.54735E-07 |
| NAT9      | -0.270336684 | 7.72246958  | 8.62213E-07 |
| HDHD3     | -0.260247752 | 7.266167359 | 8.67691E-07 |
| ZNF287    | 0.139246408  | 6.166237153 | 8.6873E-07  |
| PRRG2     | -0.176867402 | 6.39084078  | 8.70475E-07 |
| UNC84A    | 0.252750324  | 9.77218051  | 8.71597E-07 |
| SNRPF     | -0.293239198 | 9.951513077 | 8.73007E-07 |
| SRA1      | 0.263905552  | 7.133012527 | 8.76671E-07 |
| RNF170    | 0.225056162  | 7.418485498 | 8.76774E-07 |
| HLA-E     | -0.429727553 | 8.852327641 | 8.82538E-07 |
| C20ORF103 | 0.286696956  | 6.282550641 | 8.83772E-07 |
| KCNK3     | -0.205307763 | 6.723615455 | 8.86775E-07 |
| C12ORF57  | 0.228372681  | 11.42051631 | 8.87867E-07 |
| LOC653994 | -0.400918124 | 7.386458184 | 9.02368E-07 |
| SH3GLB1   | -0.340373707 | 10.05857035 | 9.03307E-07 |
| FLJ22167  | 0.166326605  | 6.706771418 | 9.07515E-07 |
| RPL39L    | 0.286866428  | 8.045982726 | 9.08133E-07 |
| GBA       | -0.173693453 | 7.367220912 | 9.08645E-07 |
| GADL1     | 0.165763156  | 6.161148211 | 9.16882E-07 |
| VPS24     | 0.284967724  | 8.727968271 | 9.18037E-07 |
| NPHP3     | 0.206520995  | 7.69873111  | 9.23097E-07 |
| ZNF613    | 0.135422553  | 7.155468601 | 9.29959E-07 |
| FKBP3     | 0.32576038   | 9.170968478 | 9.33799E-07 |
| LOC646463 | 0.325251155  | 8.138132347 | 9.3684E-07  |
| PARVB     | -0.251119963 | 7.63643639  | 9.39761E-07 |
| SGCA      | 0.278398184  | 9.381639801 | 9.50271E-07 |
| CD47      | 0.238167611  | 7.965914074 | 9.55134E-07 |
| MAF       | -0.228809769 | 6.877994012 | 9.72595E-07 |
| DMKN      | 0.272052175  | 6.804716176 | 9.73007E-07 |
| SUMO3     | -0.240154767 | 11.14996862 | 9.73922E-07 |
| SAMD4A    | 0.353377499  | 9.717111827 | 9.76488E-07 |
| SNX21     | 0.159397435  | 6.449219205 | 9.84023E-07 |



## DEG.infomation

|            |              |             |             |
|------------|--------------|-------------|-------------|
| TOMM34     | -0.285945415 | 8.434464546 | 9.84025E-07 |
| RNF125     | -0.167069437 | 6.324836072 | 9.85824E-07 |
| PPP6C      | -0.187369884 | 9.98939791  | 9.90548E-07 |
| NME1-NME2  | -0.413492911 | 9.624767105 | 9.94365E-07 |
| ASGR2      | -0.084746361 | 6.09079424  | 9.96661E-07 |
| SNORA10    | -0.153630181 | 6.488300997 | 9.99733E-07 |
| C6ORF57    | 0.243475966  | 7.869951437 | 1.0025E-06  |
| CXXC5      | 0.410422858  | 9.915398083 | 1.00606E-06 |
| ANAPC13    | 0.260665128  | 11.7300435  | 1.00642E-06 |
| RWDD4A     | 0.181795078  | 9.092868507 | 1.00676E-06 |
| TFB1M      | 0.244789352  | 8.378315785 | 1.00681E-06 |
| E2F2       | -0.164983913 | 6.101096069 | 1.01948E-06 |
| DHFRL1     | 0.137941951  | 6.747767342 | 1.02227E-06 |
| IL27RA     | -0.258567018 | 7.078810451 | 1.02286E-06 |
| NR2F6      | -0.256398641 | 8.132413071 | 1.02983E-06 |
| ZFAND6     | 0.244308976  | 8.549709799 | 1.03112E-06 |
| ZCCHC3     | 0.200617428  | 7.16267804  | 1.03584E-06 |
| LETM1      | -0.207731087 | 6.900937996 | 1.0373E-06  |
| MGC12965   | 0.287357996  | 6.644435902 | 1.03968E-06 |
| C18ORF51   | 0.50554981   | 7.56672818  | 1.03986E-06 |
| TUSC4      | 0.19863023   | 9.402724158 | 1.04423E-06 |
| AURKA      | -0.210316802 | 7.372677562 | 1.04842E-06 |
| RAB11FIP3  | 0.261690971  | 9.78584833  | 1.05221E-06 |
| ZMYM2      | 0.182360263  | 7.265902348 | 1.05833E-06 |
| U2AF1      | -0.249943121 | 7.850665266 | 1.06345E-06 |
| CCNB1IP1   | 0.234455312  | 8.920183727 | 1.06403E-06 |
| GSN        | 0.35454385   | 10.05086214 | 1.07E-06    |
| NSMCE1     | 0.19018594   | 9.060980787 | 1.0813E-06  |
| LOC647970  | 0.13976473   | 6.305233125 | 1.08368E-06 |
| ACVRL1     | -0.268675808 | 7.217763448 | 1.08539E-06 |
| THOC6      | -0.234129589 | 7.224968999 | 1.08739E-06 |
| ZFYVE21    | -0.345134783 | 9.65314815  | 1.10207E-06 |
| RCN3       | -0.346546154 | 7.126940402 | 1.10467E-06 |
| SLC25A13   | -0.298296289 | 7.485333815 | 1.12441E-06 |
| MMP28      | 0.12203989   | 6.358207374 | 1.12627E-06 |
| MLSTD1     | -0.127174166 | 6.290780794 | 1.13152E-06 |
| SNORA70    | -0.24538931  | 7.966918835 | 1.13722E-06 |
| CCNI       | 0.215664548  | 13.10666441 | 1.13741E-06 |
| MAP2K1IP1  | 0.19401503   | 9.165459855 | 1.13871E-06 |
| PENK       | 0.767737868  | 7.360787319 | 1.13919E-06 |
| SRRM1      | 0.19749309   | 9.840808718 | 1.14346E-06 |
| GABPA      | 0.184339768  | 6.80782878  | 1.14438E-06 |
| STEAP1     | -0.092995935 | 6.111097872 | 1.14674E-06 |
| FLJ39653   | 0.233963287  | 6.978083912 | 1.14846E-06 |
| HRIHFB2122 | -0.170165659 | 6.71905534  | 1.14914E-06 |
| RPL3L      | 0.353621477  | 11.32485614 | 1.15059E-06 |
| LOC729101  | 0.213894144  | 7.436439357 | 1.15266E-06 |
| ZNF365     | 0.099108616  | 6.152409619 | 1.16371E-06 |
| SNRP70     | -0.206712382 | 9.190010029 | 1.1717E-06  |
| SLCO2A1    | -0.61415268  | 8.282284517 | 1.17413E-06 |
| TMEM67     | 0.380102736  | 8.08476391  | 1.17631E-06 |

## DEG.infomation

|           |              |             |             |
|-----------|--------------|-------------|-------------|
| LAT1-3TM  | -0.140017301 | 6.422520872 | 1.17971E-06 |
| RNF130    | -0.21379974  | 8.512448499 | 1.18128E-06 |
| LOC644743 | -0.337949739 | 7.460554636 | 1.18255E-06 |
| AP1M1     | -0.231097923 | 9.752820831 | 1.18732E-06 |
| KHSRP     | -0.26529045  | 8.073260113 | 1.20155E-06 |
| EI24      | -0.224977355 | 9.321471226 | 1.20189E-06 |
| RBM12B    | 0.251362286  | 7.402259502 | 1.20703E-06 |
| C19ORF18  | 0.237100586  | 6.933679746 | 1.21547E-06 |
| PDE2A     | -0.225564816 | 6.772296378 | 1.2216E-06  |
| KIAA0564  | 0.260912447  | 7.507531872 | 1.22257E-06 |
| LOC339344 | -0.198586836 | 9.336545373 | 1.23534E-06 |
| TMEM47    | 0.379218576  | 10.08803873 | 1.23994E-06 |
| LRRC10    | 0.229434054  | 6.426175377 | 1.24429E-06 |
| NECAB3    | 0.272107161  | 7.680378691 | 1.24631E-06 |
| FOXC1     | -0.443048526 | 9.247659951 | 1.24882E-06 |
| LOC285929 | -0.2506179   | 6.448898524 | 1.25046E-06 |
| UBE2J2    | -0.122004398 | 6.41808567  | 1.25541E-06 |
| CETN3     | 0.277315041  | 7.466735961 | 1.2569E-06  |
| SLC22A18  | 0.29257594   | 7.483068316 | 1.2659E-06  |
| ZNF181    | 0.276154734  | 7.218527217 | 1.27371E-06 |
| TMEM183A  | -0.264292405 | 9.606811034 | 1.27685E-06 |
| FAM167B   | -0.151249942 | 6.196081024 | 1.27801E-06 |
| DNAJA4    | -0.485311582 | 11.71734031 | 1.28357E-06 |
| ARMCX1    | 0.29416481   | 8.570661922 | 1.29661E-06 |
| LOC643446 | -0.183693452 | 6.820554062 | 1.30123E-06 |
| NGLY1     | -0.203665328 | 8.305931151 | 1.30167E-06 |
| C18ORF1   | 0.20328754   | 6.776933119 | 1.30361E-06 |
| STAG3L2   | -0.29192051  | 8.062670514 | 1.31909E-06 |
| FOLR3     | -0.283308691 | 6.113949178 | 1.33147E-06 |
| FAM104B   | 0.151621279  | 7.100839605 | 1.33305E-06 |
| CLEC1A    | -0.220560335 | 7.022258829 | 1.33391E-06 |
| RBBP7     | 0.314575117  | 9.204310203 | 1.3417E-06  |
| C1ORF225  | 0.318959056  | 7.910042346 | 1.34361E-06 |
| LOC401019 | -0.217390647 | 13.27375104 | 1.34865E-06 |
| OPA3      | -0.213030813 | 7.01727379  | 1.35655E-06 |
| ALDH1A2   | 0.346060008  | 8.32082205  | 1.35839E-06 |
| PLAGL1    | 0.150259002  | 6.698114401 | 1.36369E-06 |
| IVD       | 0.332454813  | 9.483154986 | 1.36779E-06 |
| FIS       | -0.145283452 | 6.367827146 | 1.37481E-06 |
| PLCB2     | -0.192758108 | 6.37091749  | 1.38288E-06 |
| KIAA0196  | 0.204802364  | 8.929713713 | 1.38333E-06 |
| EGFL7     | -0.147550685 | 6.93569067  | 1.38901E-06 |
| HIST1H4H  | 0.364140291  | 7.845663084 | 1.38914E-06 |
| SUOX      | 0.248625012  | 8.64236124  | 1.40522E-06 |
| TIAM2     | 0.22431967   | 6.811342587 | 1.40727E-06 |
| ZNF703    | -0.088779018 | 6.077750357 | 1.42714E-06 |
| CDC123    | -0.232125979 | 9.002355778 | 1.42749E-06 |
| RRAGD     | 0.272994567  | 11.03261775 | 1.4278E-06  |
| FBXO9     | 0.114543717  | 6.297775436 | 1.43061E-06 |
| FAP       | 0.473261671  | 7.018487486 | 1.43268E-06 |
| DERL2     | -0.256259329 | 7.852806963 | 1.43673E-06 |

## DEG.infomation

|           |              |             |             |
|-----------|--------------|-------------|-------------|
| DECR2     | 0.287745124  | 8.212786597 | 1.43828E-06 |
| ZNF18     | 0.200377977  | 7.273314253 | 1.43833E-06 |
| KIAA0528  | 0.315786872  | 9.122974858 | 1.44147E-06 |
| BMP2      | -0.203344922 | 6.693858013 | 1.44638E-06 |
| CAV1      | -0.282572258 | 11.13586683 | 1.45476E-06 |
| TMEM80    | 0.151755826  | 6.72578385  | 1.45617E-06 |
| NUPR1     | 0.417421952  | 8.154145485 | 1.468E-06   |
| C9ORF123  | 0.225094318  | 8.459281941 | 1.46813E-06 |
| LOC389203 | 0.25427818   | 7.197658268 | 1.47028E-06 |
| ORMDL3    | 0.335815926  | 7.81394191  | 1.47513E-06 |
| EIF4E3    | 0.244288062  | 9.161645394 | 1.4761E-06  |
| RAB9A     | -0.25094397  | 9.35063697  | 1.48058E-06 |
| IPO4      | -0.250138355 | 6.906899777 | 1.48626E-06 |
| CBFA2T2   | 0.098429051  | 6.523664205 | 1.48677E-06 |
| BBS12     | -0.256534055 | 6.996289558 | 1.48685E-06 |
| PLXNB1    | -0.232997865 | 7.611481361 | 1.4896E-06  |
| HIG2      | -0.350415459 | 6.569869973 | 1.49593E-06 |
| PCDH18    | 0.287269195  | 7.442134548 | 1.4971E-06  |
| ANXA2P3   | -0.199965994 | 6.35724504  | 1.50612E-06 |
| FAM45A    | 0.26611677   | 8.699858888 | 1.51071E-06 |
| SMC4      | 0.160698319  | 7.121004381 | 1.51606E-06 |
| HPS1      | -0.132563283 | 6.432173224 | 1.51827E-06 |
| PIGZ      | 0.203169027  | 6.982184773 | 1.52671E-06 |
| MGAT4A    | -0.183173985 | 6.9298362   | 1.53385E-06 |
| PELP1     | 0.23049753   | 8.319473818 | 1.53616E-06 |
| GARS      | -0.280336553 | 9.630601724 | 1.55454E-06 |
| OSM       | -0.128004189 | 6.050562378 | 1.56639E-06 |
| C11ORF45  | 0.203607941  | 6.657424303 | 1.57071E-06 |
| TTC33     | 0.240343455  | 7.148930658 | 1.57087E-06 |
| C11ORF38  | -0.209915238 | 7.125875391 | 1.58003E-06 |
| RAB40B    | 0.422441313  | 9.972034862 | 1.58718E-06 |
| CDH23     | 0.169723197  | 6.670299099 | 1.59063E-06 |
| COQ3      | 0.298127764  | 9.980038009 | 1.60146E-06 |
| CCR2      | -0.080559616 | 6.139243126 | 1.61085E-06 |
| TMEM183B  | -0.259674694 | 9.561538413 | 1.61339E-06 |
| COG6      | 0.232143802  | 7.955359324 | 1.61765E-06 |
| LEMD2     | -0.174162162 | 7.958987401 | 1.62247E-06 |
| SKP2      | 0.110348882  | 6.926985399 | 1.63213E-06 |
| PACSIN3   | 0.34504048   | 9.71847721  | 1.64523E-06 |
| PDS5A     | -0.183458164 | 7.539917475 | 1.66892E-06 |
| AGTPBP1   | -0.256238964 | 7.969684867 | 1.68426E-06 |
| UQCRQ     | 0.210906765  | 14.0409431  | 1.68678E-06 |
| CCDC32    | 0.289269058  | 9.612294068 | 1.69034E-06 |
| FBXO30    | 0.229211154  | 7.972683917 | 1.69234E-06 |
| HEATR2    | 0.203615054  | 7.669123073 | 1.6928E-06  |
| PIGO      | -0.101093409 | 6.597044255 | 1.69493E-06 |
| KIAA1244  | 0.215228786  | 6.410524005 | 1.69717E-06 |
| KIAA1267  | 0.170131884  | 8.48223748  | 1.70784E-06 |
| PIAS4     | -0.233133292 | 8.649454713 | 1.71947E-06 |
| BMF       | 0.100562385  | 6.122953106 | 1.73846E-06 |
| WDR13     | -0.196317515 | 10.08081106 | 1.74603E-06 |

## DEG.infomation

|           |              |             |             |
|-----------|--------------|-------------|-------------|
| SRPR      | -0.210936613 | 8.280608747 | 1.74833E-06 |
| SUPT3H    | 0.12933877   | 6.644333109 | 1.76399E-06 |
| PLD3      | -0.19756196  | 8.196777973 | 1.76487E-06 |
| ELK4      | -0.09961229  | 6.232190911 | 1.77624E-06 |
| POLR2D    | -0.218091815 | 7.381488894 | 1.77777E-06 |
| ZNF561    | 0.19684384   | 6.632856235 | 1.78771E-06 |
| CFI       | -0.261489425 | 6.523670145 | 1.78973E-06 |
| UBAC1     | 0.248451978  | 11.31564634 | 1.79476E-06 |
| PMVK      | -0.29750052  | 7.34089619  | 1.79816E-06 |
| TCEB3     | -0.200948742 | 8.059312121 | 1.81127E-06 |
| LTB4R     | -0.175498736 | 6.141160122 | 1.81837E-06 |
| PTGDS     | -0.423120137 | 13.18295568 | 1.82778E-06 |
| TPMT      | -0.24000311  | 8.428479389 | 1.83077E-06 |
| SNX10     | -0.211128543 | 6.185509695 | 1.83915E-06 |
| F2RL2     | 0.138498791  | 6.136250954 | 1.84588E-06 |
| CD300LG   | -0.454049124 | 8.79678015  | 1.85361E-06 |
| UBE2O     | 0.225354684  | 7.596739696 | 1.86576E-06 |
| CCBL1     | -0.217290587 | 7.659121803 | 1.86593E-06 |
| RPLP0     | -0.424842856 | 10.77952388 | 1.87261E-06 |
| ZSWIM6    | -0.248931668 | 7.829908564 | 1.88895E-06 |
| AXIN1     | -0.266099251 | 7.572900125 | 1.89722E-06 |
| KIAA1107  | 0.126442758  | 6.246229084 | 1.90169E-06 |
| TJAP1     | 0.210309578  | 9.79194463  | 1.91405E-06 |
| DHTKD1    | 0.29332249   | 7.0817891   | 1.91656E-06 |
| AMY2B     | 0.319266758  | 7.133144079 | 1.92424E-06 |
| POLB      | 0.266167752  | 9.343490445 | 1.9425E-06  |
| ZFP161    | 0.161548812  | 7.617921257 | 1.94379E-06 |
| BOLA1     | 0.185824872  | 6.887092694 | 1.94795E-06 |
| C20ORF43  | 0.156463372  | 11.07065716 | 1.96165E-06 |
| SHE       | -0.287888711 | 7.617709101 | 1.96818E-06 |
| TRAPPC2L  | 0.305119462  | 10.3670031  | 1.97301E-06 |
| C2        | -0.17012162  | 6.549249332 | 1.99825E-06 |
| LRRC51    | 0.131793005  | 6.567280712 | 2.00743E-06 |
| RAB38     | -0.207780763 | 6.185211421 | 2.00769E-06 |
| RIC8A     | -0.211969955 | 8.85143601  | 2.02119E-06 |
| CNBP      | 0.258239715  | 11.21773097 | 2.02254E-06 |
| TMEM159   | 0.405651977  | 8.722106649 | 2.02694E-06 |
| CKAP4     | -0.273321379 | 10.01736496 | 2.03021E-06 |
| SETBP1    | 0.279429573  | 7.245697912 | 2.03653E-06 |
| C10ORF67  | 0.208812374  | 6.682767152 | 2.05651E-06 |
| KIAA1271  | -0.140826461 | 6.356520127 | 2.05805E-06 |
| ILF3      | -0.150467078 | 7.883822169 | 2.05815E-06 |
| TLR4      | -0.162060941 | 6.535152904 | 2.06735E-06 |
| WDR45L    | -0.218430914 | 8.046577249 | 2.06932E-06 |
| EHD3      | 0.276433173  | 6.715275444 | 2.07243E-06 |
| C16ORF72  | -0.1853503   | 8.492685959 | 2.07299E-06 |
| CRYBG3    | 0.151773512  | 6.301768897 | 2.07991E-06 |
| C15ORF40  | 0.146302295  | 7.298935889 | 2.08941E-06 |
| ARNT2     | 0.19100705   | 6.6422217   | 2.09876E-06 |
| LOC641825 | 0.331612261  | 7.371910874 | 2.10302E-06 |
| KCNIP3    | -0.135352663 | 6.67616538  | 2.10552E-06 |

## DEG.infomation

|           |              |             |             |
|-----------|--------------|-------------|-------------|
| PH-4      | 0.174441232  | 7.607824742 | 2.11484E-06 |
| ZNF507    | 0.14237738   | 6.323742698 | 2.1269E-06  |
| HSF4      | 0.181655226  | 6.481427958 | 2.12995E-06 |
| ANK1      | 0.249040852  | 6.850785152 | 2.13331E-06 |
| DAB2      | -0.332273153 | 8.509371433 | 2.15103E-06 |
| ABCB7     | 0.28314935   | 9.007257342 | 2.1598E-06  |
| AQP4      | -0.208648546 | 6.175338921 | 2.16355E-06 |
| AKAP8L    | -0.279598987 | 7.575236384 | 2.19517E-06 |
| OSAP      | 0.178926237  | 6.416088713 | 2.20213E-06 |
| PSMB9     | -0.243000233 | 6.83700935  | 2.2142E-06  |
| SLC16A14  | 0.146206421  | 6.535321395 | 2.22608E-06 |
| EFTUD2    | -0.229800687 | 9.02821118  | 2.24315E-06 |
| MSRB2     | 0.214527272  | 12.7463955  | 2.24611E-06 |
| SLC41A3   | -0.185904353 | 8.783561166 | 2.25081E-06 |
| FARP1     | 0.359276601  | 7.444688232 | 2.25764E-06 |
| C15ORF59  | -0.314646583 | 8.639809131 | 2.25882E-06 |
| FAM81A    | -0.208393753 | 6.23913336  | 2.26729E-06 |
| ESD       | 0.205205913  | 9.861526678 | 2.2723E-06  |
| CEP290    | 0.177799518  | 6.669057556 | 2.27249E-06 |
| CPE       | 0.431287884  | 8.979632744 | 2.28372E-06 |
| KLRG1     | 0.147253573  | 6.610242229 | 2.28703E-06 |
| TUBE1     | 0.322637346  | 7.384752784 | 2.29401E-06 |
| HIC2      | -0.1828703   | 7.031214776 | 2.31662E-06 |
| ELOVL5    | -0.377676156 | 8.056770435 | 2.32044E-06 |
| GPR124    | 0.262267482  | 7.112737398 | 2.32436E-06 |
| COQ6      | 0.225831066  | 8.482586912 | 2.32525E-06 |
| LOC283174 | -0.225357005 | 6.821073872 | 2.34268E-06 |
| CETP      | -0.143296114 | 6.394553678 | 2.34563E-06 |
| LOC643293 | 0.106024153  | 6.257815182 | 2.35581E-06 |
| CCDC51    | 0.191119106  | 7.407364588 | 2.36948E-06 |
| FHIT      | 0.207618465  | 6.922466562 | 2.37245E-06 |
| ITFG2     | 0.202028736  | 8.04181352  | 2.37804E-06 |
| FAM155B   | -0.165633597 | 6.376047976 | 2.40617E-06 |
| SMAP1     | 0.173262719  | 7.942012415 | 2.41298E-06 |
| VGLL3     | -0.18919604  | 6.319804678 | 2.41985E-06 |
| C16ORF87  | 0.248628029  | 7.890724103 | 2.4201E-06  |
| RARRES3   | -0.496556978 | 8.197334892 | 2.42893E-06 |
| WDR59     | 0.223954234  | 9.271776414 | 2.45994E-06 |
| FBL       | -0.220945767 | 9.666532481 | 2.46026E-06 |
| C2ORF18   | -0.220273573 | 6.997678511 | 2.47683E-06 |
| HS3ST2    | -0.12112252  | 6.160133029 | 2.49374E-06 |
| ESRRAP2   | -0.240539879 | 9.326268856 | 2.49903E-06 |
| SETD3     | 0.176758627  | 10.20115817 | 2.51633E-06 |
| ZNF234    | 0.175715237  | 7.176827082 | 2.52482E-06 |
| SNRPA1    | -0.259751078 | 9.936237789 | 2.52607E-06 |
| SNCAIP    | 0.239118187  | 6.962620694 | 2.55699E-06 |
| ZDHHC15   | 0.17326701   | 6.44941573  | 2.5589E-06  |
| ZNF491    | 0.106357268  | 6.405863495 | 2.56133E-06 |
| ZER1      | 0.220802499  | 7.552378316 | 2.56151E-06 |
| ZNF12     | 0.180979321  | 6.738164249 | 2.58163E-06 |
| ZNF25     | 0.289422062  | 9.294582843 | 2.58571E-06 |

## DEG.infomation

|           |              |             |             |
|-----------|--------------|-------------|-------------|
| C11ORF71  | 0.230171999  | 6.902394785 | 2.59142E-06 |
| EDN1      | -0.352833398 | 6.953398971 | 2.59797E-06 |
| SLAIN1    | 0.178777924  | 6.77240041  | 2.60757E-06 |
| C3ORF33   | 0.20024336   | 6.646977412 | 2.62056E-06 |
| PTRH1     | -0.293987202 | 7.697857571 | 2.62917E-06 |
| GNMT      | -0.185807683 | 6.148215101 | 2.62958E-06 |
| MED23     | 0.122968005  | 7.098453502 | 2.63595E-06 |
| LRRCC1    | 0.186445807  | 6.798300839 | 2.64734E-06 |
| CD52      | -0.302022115 | 6.985311901 | 2.66153E-06 |
| TSNAX     | 0.262312626  | 7.699966838 | 2.66158E-06 |
| KCMF1     | -0.135383383 | 6.807205733 | 2.6625E-06  |
| MYO9A     | -0.202570117 | 7.997230087 | 2.66775E-06 |
| LOC645863 | 0.154581296  | 6.41218332  | 2.67097E-06 |
| LOC440349 | -0.144119034 | 6.408476203 | 2.67252E-06 |
| AGPAT9    | 0.323617806  | 9.637084055 | 2.67682E-06 |
| KRCC1     | 0.252911233  | 8.417847655 | 2.67957E-06 |
| CHKB      | 0.217196751  | 7.957809478 | 2.68099E-06 |
| S100A4    | -0.440440614 | 10.92224018 | 2.69159E-06 |
| PNPLA7    | 0.498006398  | 8.880082771 | 2.70525E-06 |
| HKR1      | 0.176657657  | 7.331691674 | 2.70609E-06 |
| FAM57A    | -0.205464105 | 7.473795876 | 2.71846E-06 |
| CEP57     | 0.182006243  | 6.750191437 | 2.7226E-06  |
| CPNE3     | 0.273869998  | 10.62108839 | 2.72908E-06 |
| A4GALT    | -0.435605593 | 8.775687938 | 2.75045E-06 |
| RTN4R     | 0.147197058  | 6.338311835 | 2.76007E-06 |
| BHMT2     | -0.178181189 | 6.464856154 | 2.77232E-06 |
| DOCK10    | -0.210278937 | 6.987389935 | 2.79765E-06 |
| LINGO4    | 0.301004676  | 6.976628958 | 2.81276E-06 |
| GDF10     | 0.194431873  | 6.251550236 | 2.8237E-06  |
| CHMP2A    | 0.161659032  | 9.556310887 | 2.84145E-06 |
| KPNA4     | 0.269214876  | 11.1724788  | 2.84892E-06 |
| KIAA1688  | -0.189969605 | 6.864170902 | 2.85705E-06 |
| CCDC136   | 0.404167796  | 7.980447919 | 2.86575E-06 |
| PEBP4     | -0.578551761 | 8.948643673 | 2.86984E-06 |
| BBS1      | 0.213851142  | 7.674554497 | 2.88781E-06 |
| DYRK3     | 0.124530708  | 6.512325744 | 2.90955E-06 |
| TMEM177   | -0.186305923 | 7.702596337 | 2.94608E-06 |
| STIL      | 0.233246081  | 7.232797651 | 2.96796E-06 |
| MRPL1     | 0.292442574  | 8.637126814 | 2.97102E-06 |
| LAMA4     | 0.315551352  | 8.420100152 | 2.97968E-06 |
| ACBD5     | 0.182681523  | 6.472705846 | 2.98521E-06 |
| CDCA2     | -0.424665678 | 7.083354296 | 2.99599E-06 |
| LOC648057 | 0.255950005  | 6.826868101 | 3.00597E-06 |
| GNRH1     | 0.160080149  | 6.928290032 | 3.01692E-06 |
| SLC38A7   | 0.199570394  | 6.815018672 | 3.02341E-06 |
| CIR       | 0.270480983  | 7.568882853 | 3.05667E-06 |
| SH3BGR    | 0.273700451  | 7.33413958  | 3.06603E-06 |
| HIBCH     | 0.306187707  | 8.962105122 | 3.07552E-06 |
| C18ORF8   | -0.192654324 | 8.088138439 | 3.09097E-06 |
| MAT2B     | 0.187219657  | 9.550159107 | 3.10535E-06 |
| TMUB2     | -0.124375075 | 7.58303678  | 3.15078E-06 |

## DEG.infomation

|           |              |             |             |
|-----------|--------------|-------------|-------------|
| RBBP9     | 0.134562351  | 7.149273114 | 3.16552E-06 |
| SDC2      | 0.244843032  | 7.493411237 | 3.17022E-06 |
| NPHP1     | 0.075487273  | 6.278541879 | 3.18652E-06 |
| RNF24     | -0.212760379 | 6.93507849  | 3.18965E-06 |
| GNPNAT1   | -0.19870341  | 6.247986416 | 3.19066E-06 |
| SAMD13    | 0.128445761  | 6.262209582 | 3.19137E-06 |
| YIPF1     | -0.180156428 | 8.345328241 | 3.19414E-06 |
| TMEM198   | -0.160937214 | 6.354385956 | 3.20156E-06 |
| UBTD2     | -0.117732166 | 6.383479331 | 3.20234E-06 |
| FKBP14    | -0.338770474 | 9.191591834 | 3.2218E-06  |
| DPF3      | 0.279774452  | 7.472696538 | 3.22835E-06 |
| ZNF71     | 0.407603035  | 8.77332479  | 3.23E-06    |
| MRPL52    | 0.191057395  | 8.04859243  | 3.23632E-06 |
| PLEKHA5   | 0.474734562  | 8.254517443 | 3.24778E-06 |
| AKAP11    | 0.158330059  | 7.621474636 | 3.24883E-06 |
| KIAA0152  | -0.280115347 | 10.033861   | 3.25119E-06 |
| SRPK1     | -0.17346478  | 8.256244697 | 3.27217E-06 |
| EDIL3     | 0.227225293  | 6.33522583  | 3.27537E-06 |
| LOC652545 | -0.273320984 | 8.462344665 | 3.27871E-06 |
| LRRC8D    | -0.207473722 | 6.571837548 | 3.28225E-06 |
| YIPF3     | -0.264239397 | 9.603378796 | 3.29171E-06 |
| DBN1      | -0.317640436 | 7.455345689 | 3.35011E-06 |
| HECW2     | 0.378660896  | 8.44340745  | 3.41589E-06 |
| RIOK2     | 0.194362756  | 8.11991856  | 3.41708E-06 |
| C14ORF2   | 0.290206831  | 9.636941674 | 3.41994E-06 |
| LOC642299 | 0.230839528  | 7.105571898 | 3.4483E-06  |
| FAM50B    | 0.277265163  | 8.39761267  | 3.46945E-06 |
| LEPR      | 0.199618999  | 6.635496485 | 3.48562E-06 |
| CRISPLD1  | 0.10807434   | 6.129072431 | 3.4956E-06  |
| ZFYVE16   | 0.156846507  | 7.369036874 | 3.50691E-06 |
| MAGED2    | 0.176014987  | 7.014003837 | 3.53055E-06 |
| U2AF1L4   | 0.163058509  | 7.217354623 | 3.5421E-06  |
| CHODL     | 0.182332918  | 7.086451275 | 3.5486E-06  |
| MARCKSL1  | -0.344289003 | 7.949922177 | 3.58647E-06 |
| SGPL1     | -0.132307117 | 6.658501557 | 3.59145E-06 |
| C1S       | -0.398773441 | 8.053278233 | 3.6005E-06  |
| FAM33A    | 0.168365812  | 7.358695563 | 3.6231E-06  |
| SNAP23    | 0.248365375  | 7.86293133  | 3.62988E-06 |
| EIF4A3    | -0.171695942 | 9.366449142 | 3.64158E-06 |
| GNL3      | -0.290334175 | 7.857558137 | 3.65077E-06 |
| KCNT2     | 0.133372134  | 6.181932355 | 3.6687E-06  |
| MMP15     | 0.309891804  | 7.497859137 | 3.67353E-06 |
| GOLGA4    | 0.209140687  | 8.344351526 | 3.69039E-06 |
| NDRG2     | -0.475253298 | 9.297911673 | 3.70028E-06 |
| GCNT3     | -0.209532942 | 6.078860861 | 3.70129E-06 |
| RPAIN     | 0.210460031  | 10.23065512 | 3.70285E-06 |
| LOC650695 | -0.135239929 | 6.08807188  | 3.80633E-06 |
| THY1      | 0.629629857  | 7.15821396  | 3.81354E-06 |
| LMNB1     | -0.126814981 | 6.10000153  | 3.8224E-06  |
| CADPS2    | -0.231671326 | 7.012261774 | 3.82992E-06 |
| BTRC      | 0.19347267   | 6.81280145  | 3.84324E-06 |

## DEG.infomation

|           |              |             |             |
|-----------|--------------|-------------|-------------|
| ANKRD23   | 0.366599015  | 6.916821346 | 3.87638E-06 |
| PAWR      | -0.212264566 | 6.739060358 | 3.8818E-06  |
| CRKL      | -0.211440487 | 10.3604246  | 3.89197E-06 |
| CDC5L     | 0.247975959  | 8.254409752 | 3.90897E-06 |
| C20ORF194 | 0.146520122  | 6.8871312   | 3.90958E-06 |
| GTF3C3    | 0.181213192  | 8.415152277 | 3.91365E-06 |
| C4ORF27   | 0.168107517  | 8.24310369  | 3.91831E-06 |
| TGFB111   | -0.223575976 | 7.09738342  | 3.93832E-06 |
| GPR162    | -0.218610994 | 7.398761282 | 3.93895E-06 |
| ACVR2A    | 0.144662171  | 7.122610983 | 3.97037E-06 |
| PPP2R3C   | 0.207566034  | 8.929204982 | 4.01941E-06 |
| FOXK2     | -0.112196996 | 6.282670643 | 4.05801E-06 |
| ELP4      | 0.168032663  | 7.303977805 | 4.07311E-06 |
| PGLS      | -0.270801492 | 8.352777072 | 4.07369E-06 |
| EP300     | 0.177624047  | 7.577614215 | 4.07413E-06 |
| PLXNA3    | -0.249823284 | 6.767285137 | 4.08529E-06 |
| WIPI1     | 0.297334355  | 9.883590209 | 4.09763E-06 |
| C11ORF54  | 0.203795159  | 8.089888809 | 4.1045E-06  |
| GRB10     | 0.156220564  | 7.249761844 | 4.14627E-06 |
| SNORD108  | 0.134165896  | 6.168208663 | 4.14671E-06 |
| BCAM      | 0.087392491  | 6.313945473 | 4.15276E-06 |
| PANK2     | -0.135836148 | 7.536848773 | 4.1546E-06  |
| CLEC5A    | -0.186063001 | 6.271306276 | 4.15915E-06 |
| ANXA1     | -0.381173717 | 9.896294897 | 4.1719E-06  |
| ZNF462    | 0.288819439  | 8.71170752  | 4.1934E-06  |
| LSM7      | -0.269881727 | 9.778756317 | 4.19665E-06 |
| NMD3      | 0.232807581  | 8.676761118 | 4.24323E-06 |
| MGC71993  | -0.189379139 | 10.28828842 | 4.25948E-06 |
| PNMT      | -0.155707997 | 6.344155799 | 4.27718E-06 |
| PLEKHG1   | -0.219535799 | 6.732465453 | 4.28392E-06 |
| FABP3     | 0.383018331  | 11.29832356 | 4.3026E-06  |
| TP53I13   | -0.370930809 | 8.933926871 | 4.31725E-06 |
| TRIM32    | 0.154126251  | 7.489337054 | 4.33422E-06 |
| TES       | -0.137161875 | 6.268546197 | 4.33917E-06 |
| SLC25A16  | 0.16418245   | 6.627028145 | 4.34473E-06 |
| RB1CC1    | 0.267637271  | 9.459333672 | 4.35922E-06 |
| PDXP      | 0.230028169  | 9.740999602 | 4.3687E-06  |
| MLH1      | 0.311281662  | 8.857357191 | 4.37347E-06 |
| KIT       | 0.322298789  | 7.143298111 | 4.3859E-06  |
| DVL3      | 0.293386239  | 8.545228503 | 4.39352E-06 |
| ZBTB7B    | -0.157278563 | 6.386701704 | 4.39491E-06 |
| HINT2     | 0.239570849  | 10.15375009 | 4.3975E-06  |
| FLJ39632  | 0.102582558  | 6.183240218 | 4.40367E-06 |
| HNRNPU    | -0.244463465 | 8.287321485 | 4.40796E-06 |
| CRSP9     | 0.140039669  | 6.99349351  | 4.4097E-06  |
| HSP90B1   | -0.352105391 | 12.01183315 | 4.41772E-06 |
| ZC3H6     | 0.195065649  | 7.049174613 | 4.42943E-06 |
| LOC402176 | -0.184269938 | 6.289997047 | 4.48719E-06 |
| MFSD7     | -0.158524079 | 6.597223559 | 4.49669E-06 |
| LMAN2L    | 0.229972034  | 8.583521301 | 4.51542E-06 |
| CAMK2G    | 0.147674715  | 7.06053021  | 4.54003E-06 |



## DEG.infomation

|           |              |             |             |
|-----------|--------------|-------------|-------------|
| FDX1L     | 0.177947238  | 7.959079794 | 4.57523E-06 |
| EIF5A     | -0.335907641 | 10.09786762 | 4.58718E-06 |
| HAS3      | 0.114934236  | 6.149153697 | 4.60345E-06 |
| TCEA1     | 0.202509121  | 7.221669685 | 4.60689E-06 |
| ITSN1     | -0.198400489 | 8.102996528 | 4.63688E-06 |
| PRKAA2    | 0.344395153  | 7.451691064 | 4.67452E-06 |
| MTERF     | 0.115669088  | 6.532634954 | 4.68139E-06 |
| SLC43A3   | -0.141644952 | 6.774429297 | 4.68402E-06 |
| PKIA      | 0.262262072  | 10.788681   | 4.70169E-06 |
| DHX33     | -0.172825058 | 7.325551812 | 4.70959E-06 |
| B3GAT3    | -0.174599504 | 6.581474779 | 4.73436E-06 |
| SHROOM4   | -0.341879042 | 9.971078844 | 4.74217E-06 |
| ATP11C    | -0.133003174 | 6.393088475 | 4.75174E-06 |
| LOC144481 | 0.166812128  | 6.234658964 | 4.75411E-06 |
| SHPRH     | 0.114450082  | 6.590370527 | 4.76697E-06 |
| YOD1      | 0.210137327  | 7.299766696 | 4.76902E-06 |
| RAPGEF3   | -0.169908296 | 6.745156732 | 4.8074E-06  |
| PPP1R8    | 0.10076281   | 6.728054663 | 4.80861E-06 |
| CYB561D2  | -0.162059155 | 7.255876525 | 4.82723E-06 |
| DDX23     | -0.201327589 | 7.825937556 | 4.83048E-06 |
| VTN       | 0.46761135   | 8.741802437 | 4.85038E-06 |
| HDAC2     | 0.227236045  | 9.640893898 | 4.89796E-06 |
| CORO1C    | -0.321985752 | 8.138814496 | 4.90248E-06 |
| THAP1     | 0.167496081  | 7.217630797 | 4.91456E-06 |
| FBXL20    | 0.177344627  | 7.453692114 | 4.92125E-06 |
| NAP1L1    | 0.217943827  | 8.364325214 | 4.93189E-06 |
| CHMP1B    | -0.230316935 | 9.101183024 | 4.9379E-06  |
| HEXIM2    | 0.172725453  | 6.646690905 | 4.95857E-06 |
| SELE      | -0.202572419 | 6.29582129  | 4.95954E-06 |
| STBD1     | -0.317488788 | 7.599608789 | 4.9924E-06  |
| ABCA5     | 0.118593706  | 6.358639187 | 5.04682E-06 |
| IARS2     | 0.238831347  | 9.915757664 | 5.06366E-06 |
| PCDHB15   | -0.146178587 | 6.127009784 | 5.07495E-06 |
| C1ORF216  | -0.184405207 | 6.825445171 | 5.11515E-06 |
| MTCP1     | 0.231341857  | 10.60119236 | 5.14958E-06 |
| CCDC43    | 0.246734731  | 7.643218864 | 5.17261E-06 |
| GNPTAB    | 0.17667316   | 7.300325863 | 5.17757E-06 |
| C1QL1     | -0.152009253 | 6.266596806 | 5.18109E-06 |
| BNIP3     | 0.268948033  | 11.80340992 | 5.20832E-06 |
| LZTR1     | -0.238081953 | 9.069926242 | 5.22785E-06 |
| PLEKHO1   | -0.388566975 | 8.921189551 | 5.2652E-06  |
| BMP7      | -0.283447418 | 6.369391931 | 5.2912E-06  |
| SPAG7     | 0.251743674  | 9.83100307  | 5.30069E-06 |
| CYP1B1    | -0.65519443  | 8.593168422 | 5.3259E-06  |
| NPEPL1    | 0.248265583  | 8.943086196 | 5.33631E-06 |
| BMPR2     | 0.161095772  | 8.997967635 | 5.34815E-06 |
| SPATA5L1  | 0.21259081   | 7.560089164 | 5.35442E-06 |
| PSMB3     | -0.168253311 | 11.17138538 | 5.35827E-06 |
| LOC642333 | 0.346299065  | 9.598939561 | 5.36478E-06 |
| PSME2     | -0.40617863  | 9.016190206 | 5.3734E-06  |
| OSR2      | -0.080747532 | 6.110540731 | 5.38052E-06 |

## DEG.infomation

|           |              |             |             |
|-----------|--------------|-------------|-------------|
| RUNDC2A   | -0.118010802 | 6.179540127 | 5.38797E-06 |
| AIG1      | 0.354405137  | 8.515631386 | 5.39933E-06 |
| ADSSL1    | 0.341059023  | 9.23639619  | 5.39942E-06 |
| PPP1R14A  | -0.30239409  | 9.254383179 | 5.42789E-06 |
| REPS1     | 0.150766677  | 6.713442766 | 5.44828E-06 |
| TMEM27    | 0.163448036  | 6.357611613 | 5.44858E-06 |
| AHCY      | -0.223968407 | 9.379270016 | 5.45842E-06 |
| C14ORF131 | 0.243718444  | 8.671866293 | 5.46038E-06 |
| SRRP35    | -0.150269835 | 6.066415575 | 5.47392E-06 |
| EVI2B     | -0.189461918 | 6.43708252  | 5.48535E-06 |
| RPS6KA2   | -0.244704186 | 8.522724333 | 5.50104E-06 |
| MYL5      | 0.267012036  | 7.147755202 | 5.51135E-06 |
| SH2D5     | -0.187484664 | 6.43517709  | 5.51938E-06 |
| SEPP1     | 0.385502014  | 8.35794281  | 5.52794E-06 |
| CHUK      | -0.180366326 | 7.882389399 | 5.52892E-06 |
| GPSM3     | -0.234859212 | 6.24617326  | 5.54528E-06 |
| WDR67     | 0.220282876  | 7.156474889 | 5.56766E-06 |
| SCG2      | 0.406799549  | 6.34081482  | 5.5987E-06  |
| SEC14L2   | -0.166159343 | 6.017590835 | 5.61653E-06 |
| APCDD1    | 0.374281751  | 8.078393002 | 5.65019E-06 |
| SCRN2     | 0.175174947  | 6.992070727 | 5.67025E-06 |
| TOR1AIP2  | 0.117622001  | 6.524841667 | 5.69147E-06 |
| CNOT4     | 0.161367057  | 7.462917245 | 5.75143E-06 |
| ATG5      | 0.186053374  | 7.777025238 | 5.75956E-06 |
| PDGFC     | 0.251780929  | 7.771669355 | 5.76594E-06 |
| C20ORF132 | 0.086007495  | 6.345605641 | 5.76754E-06 |
| UBE1C     | 0.317766367  | 7.306568848 | 5.77164E-06 |
| PPIL3     | 0.260509569  | 8.192125965 | 5.78993E-06 |
| CXXC1     | -0.175241593 | 8.526258465 | 5.79512E-06 |
| SCAPER    | 0.250722733  | 8.142243825 | 5.81575E-06 |
| LOC645566 | 0.184855497  | 6.193600267 | 5.86241E-06 |
| DVL2      | 0.152653003  | 7.304313984 | 5.86483E-06 |
| GABRB3    | -0.070906822 | 6.122694043 | 5.87669E-06 |
| U2AF1L2   | 0.297509246  | 8.760474951 | 5.90362E-06 |
| ASS1      | -0.267829963 | 8.097952732 | 5.90691E-06 |
| CEACAM3   | 0.149951913  | 6.49857015  | 5.94503E-06 |
| POSTN     | 0.624928263  | 7.80432931  | 5.94605E-06 |
| LPCAT4    | -0.296504868 | 6.991856568 | 5.98363E-06 |
| HAND2     | 0.259922531  | 7.46913511  | 5.99872E-06 |
| LOC644436 | -0.199471679 | 6.193469002 | 6.00823E-06 |
| WDR55     | -0.182747992 | 6.820387496 | 6.03849E-06 |
| STK33     | 0.19561922   | 7.320473502 | 6.04378E-06 |
| STX4      | -0.338243696 | 8.912508229 | 6.1066E-06  |
| APOE      | 0.605571013  | 9.011193494 | 6.1271E-06  |
| SMARCB1   | -0.190020186 | 7.589524145 | 6.12858E-06 |
| TTC13     | -0.145878096 | 7.105578305 | 6.15579E-06 |
| PNPLA6    | -0.174993761 | 8.468396519 | 6.18592E-06 |
| PTTG1     | -0.302888693 | 6.599709753 | 6.20586E-06 |
| PTHLH     | 0.263732392  | 6.325987278 | 6.21632E-06 |
| CNN1      | -0.698453179 | 9.308810118 | 6.21958E-06 |
| SIVA      | -0.230091836 | 9.248132321 | 6.22829E-06 |

## DEG.infomation

|           |              |             |             |
|-----------|--------------|-------------|-------------|
| ACOT8     | 0.18220785   | 7.31337459  | 6.23502E-06 |
| ANKRD26   | 0.193994666  | 7.231776616 | 6.23705E-06 |
| RN7SK     | -0.242877765 | 7.544488412 | 6.24392E-06 |
| BET1      | 0.16599762   | 7.334582659 | 6.2443E-06  |
| EIF2A     | 0.203967744  | 9.925959388 | 6.24446E-06 |
| TAX1BP3   | 0.204332898  | 10.75852882 | 6.26198E-06 |
| USP10     | -0.229612926 | 7.747004295 | 6.29974E-06 |
| KIAA0247  | -0.17611895  | 7.838515923 | 6.34972E-06 |
| C18ORF21  | 0.175215398  | 7.948950579 | 6.35113E-06 |
| GFM1      | 0.218184235  | 10.12633843 | 6.41619E-06 |
| CASC4     | 0.173198432  | 7.013051002 | 6.42781E-06 |
| HEYL      | -0.457001879 | 9.857875113 | 6.43074E-06 |
| SNX11     | -0.135367498 | 7.439427912 | 6.43081E-06 |
| BEX2      | 0.401459124  | 7.234679121 | 6.44118E-06 |
| P4HA2     | -0.254385397 | 8.533066804 | 6.45576E-06 |
| KCNMA1    | 0.102149125  | 6.268370925 | 6.46347E-06 |
| PPP1R3E   | 0.159671527  | 6.646261746 | 6.47021E-06 |
| LRRC47    | 0.180087972  | 9.325987835 | 6.47953E-06 |
| LUZP1     | -0.256858143 | 9.787384221 | 6.48664E-06 |
| C20ORF107 | -0.100082995 | 6.279118134 | 6.49607E-06 |
| LOC642780 | 0.084406484  | 6.264720998 | 6.49998E-06 |
| USP38     | -0.421073488 | 9.392593583 | 6.51626E-06 |
| ZNF148    | 0.394456218  | 9.457370263 | 6.51743E-06 |
| FLJ43663  | 0.282652394  | 7.123994557 | 6.52751E-06 |
| ARPP-19   | -0.202551345 | 8.236156189 | 6.59704E-06 |
| PFAAP5    | 0.265729422  | 7.989707811 | 6.62866E-06 |
| MPDZ      | 0.285688023  | 9.389910921 | 6.66085E-06 |
| SNUPN     | 0.160824112  | 8.058393247 | 6.72566E-06 |
| FLJ21438  | -0.202900248 | 6.986758977 | 6.72799E-06 |
| LOC642921 | -0.144356781 | 6.314426909 | 6.74891E-06 |
| SDHAP3    | 0.097528683  | 6.371500083 | 6.75605E-06 |
| ME2       | 0.276208849  | 9.338697737 | 6.79538E-06 |
| LONP1     | 0.239067048  | 9.818867662 | 6.80377E-06 |
| SDHD      | 0.40273875   | 10.81736601 | 6.82189E-06 |
| C9ORF16   | 0.248670963  | 7.014922691 | 6.84266E-06 |
| TPP2      | 0.112967635  | 7.00864342  | 6.85058E-06 |
| HRH2      | 0.115828334  | 6.072726442 | 6.85297E-06 |
| SLC25A20  | 0.281436274  | 8.312890183 | 6.85877E-06 |
| CUX2      | 0.201543189  | 6.021775679 | 6.91458E-06 |
| RING1     | -0.169775467 | 10.12538422 | 6.94485E-06 |
| DHX35     | 0.190986325  | 7.507436821 | 6.97942E-06 |
| PI4KB     | -0.146638588 | 8.145563373 | 6.99422E-06 |
| PPP2R1B   | 0.096285103  | 6.633179109 | 7.00023E-06 |
| GOT2      | 0.27549259   | 12.41408151 | 7.03591E-06 |
| LOC647054 | 0.133001197  | 6.546059155 | 7.03616E-06 |
| RASL12    | -0.245783257 | 8.826881071 | 7.0365E-06  |
| ZNF425    | 0.133115204  | 6.306589196 | 7.09344E-06 |
| LOC649604 | -0.178204009 | 6.388499242 | 7.10931E-06 |
| CHCHD5    | 0.20991071   | 8.448217984 | 7.11176E-06 |
| USP22     | -0.11660963  | 6.380798898 | 7.12209E-06 |
| VWF       | -0.247975401 | 13.03337409 | 7.12623E-06 |

## DEG.infomation

|               |              |             |             |
|---------------|--------------|-------------|-------------|
| HEBP2         | 0.268422511  | 11.73391124 | 7.12918E-06 |
| C1ORF128      | -0.230180693 | 9.738263017 | 7.14725E-06 |
| TAF1C         | -0.190833707 | 8.212025895 | 7.19785E-06 |
| LOC339804     | 0.44781391   | 7.754029208 | 7.21335E-06 |
| ANP32A        | 0.385825277  | 7.069310621 | 7.21933E-06 |
| DHRS4L2       | 0.27617331   | 8.009108847 | 7.2216E-06  |
| CDK5          | 0.228706652  | 7.142954305 | 7.29501E-06 |
| PARP9         | -0.250551803 | 7.538549225 | 7.33283E-06 |
| RBM5          | 0.180639809  | 10.21384697 | 7.36623E-06 |
| YIPF4         | 0.352311082  | 8.562299232 | 7.37421E-06 |
| GMDS          | -0.208247665 | 8.547643871 | 7.39235E-06 |
| GATA6         | 0.182349633  | 6.544359437 | 7.40954E-06 |
| RPGR          | -0.183135355 | 6.457517751 | 7.41208E-06 |
| PPP1R11       | -0.195038838 | 10.66987169 | 7.41612E-06 |
| TPPP3         | 0.164517091  | 6.73489517  | 7.43432E-06 |
| UBTF          | 0.097475911  | 6.439390671 | 7.43743E-06 |
| C3ORF15       | 0.138785144  | 6.799681279 | 7.44566E-06 |
| PLEKHA6       | 0.29758898   | 7.156098744 | 7.48114E-06 |
| NME5          | 0.206619716  | 6.667789127 | 7.49642E-06 |
| ZFAND1        | 0.173452642  | 7.726943705 | 7.51658E-06 |
| GSPT1         | -0.28262055  | 10.99727795 | 7.5797E-06  |
| DKFZP564O0523 | 0.155375802  | 6.670928582 | 7.65245E-06 |
| ZSCAN4        | 0.132828106  | 6.245398108 | 7.66822E-06 |
| SYNE2         | 0.286963868  | 7.588826715 | 7.67182E-06 |
| ENSA          | -0.201869335 | 7.137009261 | 7.72471E-06 |
| ATE1          | 0.079724224  | 6.348027534 | 7.7401E-06  |
| WNT2B         | 0.122163725  | 6.703464316 | 7.82609E-06 |
| GTF2B         | 0.139304013  | 7.798390498 | 7.83028E-06 |
| TMEM182       | 0.564810295  | 9.207178442 | 7.84806E-06 |
| LOC728635     | 0.251712454  | 7.693311383 | 7.8582E-06  |
| ZNF517        | 0.085165369  | 6.306946023 | 7.87724E-06 |
| TPPP          | -0.220559966 | 6.373453428 | 7.88774E-06 |
| RBM26         | 0.196110711  | 7.290526036 | 7.88952E-06 |
| ENPP2         | 0.365902732  | 7.096411455 | 7.92288E-06 |
| ZFYVE26       | 0.203517599  | 8.513383194 | 7.92661E-06 |
| MGC18216      | 0.264907012  | 8.164763627 | 7.92794E-06 |
| LOC648249     | -0.309046013 | 9.889540183 | 7.95041E-06 |
| CISD1         | 0.180097116  | 12.32484724 | 7.95161E-06 |
| LOC651029     | -0.29181732  | 6.940288773 | 7.98746E-06 |
| DKK3          | 0.401185032  | 11.71459575 | 8.00398E-06 |
| MCM2          | 0.186785309  | 6.883659724 | 8.00407E-06 |
| JPH1          | -0.317441485 | 8.357419538 | 8.00572E-06 |
| CCDC131       | 0.154328472  | 6.887172869 | 8.06668E-06 |
| AOAH          | -0.161488408 | 6.320637573 | 8.08619E-06 |
| CNIH4         | -0.378477689 | 9.608850028 | 8.15147E-06 |
| RIPK1         | -0.174585547 | 7.427938866 | 8.1773E-06  |
| NUDC          | -0.162978236 | 11.22809088 | 8.22595E-06 |
| FGL2          | -0.281497411 | 7.670210037 | 8.26987E-06 |
| LZTFL1        | 0.192132043  | 7.234208683 | 8.2822E-06  |
| KIAA0261      | 0.236059776  | 7.537283903 | 8.29213E-06 |
| DYNC1L1       | 0.27635758   | 7.132449925 | 8.3242E-06  |

## DEG.infomation

|           |              |             |             |
|-----------|--------------|-------------|-------------|
| ACTR5     | -0.191303047 | 7.026659669 | 8.33388E-06 |
| TPM2      | -0.228322804 | 11.63143974 | 8.34007E-06 |
| LOC401238 | -0.164536608 | 6.398229419 | 8.38935E-06 |
| ARMET     | -0.378527822 | 10.42335366 | 8.41271E-06 |
| TRADD     | -0.137073119 | 6.524541142 | 8.42785E-06 |
| RENBP     | 0.251261642  | 8.307070443 | 8.43324E-06 |
| NPR2      | 0.143553661  | 7.160139061 | 8.51308E-06 |
| TMEM62    | -0.194794124 | 7.825770713 | 8.52605E-06 |
| GLRX2     | -0.245906449 | 8.173686208 | 8.56759E-06 |
| AK3       | 0.275444874  | 11.43370532 | 8.57331E-06 |
| ARGLU1    | 0.258228175  | 10.45202592 | 8.58261E-06 |
| LOC653308 | 0.195014269  | 7.076768066 | 8.58958E-06 |
| TEF       | 0.336365986  | 7.682216781 | 8.60545E-06 |
| BBS9      | -0.524633285 | 7.49542781  | 8.76443E-06 |
| SLC19A3   | -0.138745311 | 6.158138482 | 8.79371E-06 |
| ENDOG     | -0.255482364 | 8.466374547 | 8.89897E-06 |
| ANKRD32   | 0.183739731  | 6.75986404  | 8.92641E-06 |
| C9ORF23   | 0.267069502  | 7.836426873 | 8.92717E-06 |
| TSPAN4    | -0.226495511 | 7.721729879 | 8.93355E-06 |
| LOC440093 | -0.333834159 | 8.007552811 | 8.96862E-06 |
| MFHAS1    | -0.188986791 | 6.646822639 | 9.00709E-06 |
| STMN1     | 0.114996527  | 6.531106733 | 9.03767E-06 |
| CTBP2     | -0.09032764  | 6.258666393 | 9.0388E-06  |
| ZBTB48    | -0.157068444 | 7.719842578 | 9.04724E-06 |
| LOC643911 | 0.392583261  | 8.423167924 | 9.05456E-06 |
| ARHGAP11A | -0.102354424 | 6.209444371 | 9.16824E-06 |
| DIABLO    | -0.151337787 | 9.410910242 | 9.16991E-06 |
| LEPRE1    | -0.199078158 | 7.182313763 | 9.20019E-06 |
| NSUN3     | 0.133282947  | 6.854591771 | 9.23901E-06 |
| PDXK      | -0.194437871 | 9.623276219 | 9.25545E-06 |
| ASL       | -0.095116135 | 6.25092879  | 9.2996E-06  |
| SNAPC3    | 0.173593059  | 7.541912946 | 9.30709E-06 |
| AXIN2     | -0.280841542 | 8.257864392 | 9.31643E-06 |
| PNN       | 0.261904391  | 9.181427729 | 9.40682E-06 |
| SCARA5    | -0.464816143 | 7.440804596 | 9.48233E-06 |
| ELOVL4    | 0.251616146  | 7.157032142 | 9.5689E-06  |
| ZNF644    | 0.141336395  | 7.076565041 | 9.57297E-06 |
| EPDR1     | 0.43841618   | 11.09565953 | 9.68954E-06 |
| ERN1      | -0.141288336 | 6.705575482 | 9.75384E-06 |
| CDC42BPB  | 0.221829697  | 8.123318989 | 9.84153E-06 |
| PNO1      | -0.277477128 | 7.308778491 | 9.8952E-06  |
| TNNC2     | 0.124594865  | 6.112900887 | 9.93013E-06 |
| GLTSCR1   | -0.147518968 | 7.663282996 | 9.9576E-06  |
| C11ORF48  | -0.256958007 | 8.265095008 | 1.01108E-05 |
| LOC648605 | 0.128245167  | 6.594751842 | 1.01264E-05 |
| SRM       | -0.270563476 | 8.542383042 | 1.01266E-05 |
| HMG20A    | 0.187647869  | 7.268505282 | 1.01715E-05 |
| DERL1     | -0.261283848 | 9.049812939 | 1.01945E-05 |
| SIRT1     | 0.238022506  | 7.87063066  | 1.03153E-05 |
| LOC644096 | 0.131950035  | 7.400138017 | 1.04077E-05 |
| C4ORF14   | 0.165384731  | 8.68146049  | 1.0423E-05  |

## DEG.infomation

|           |              |             |             |
|-----------|--------------|-------------|-------------|
| ISCA1L    | 0.217290543  | 8.651972611 | 1.04245E-05 |
| HOXD12    | 0.185213885  | 7.963724239 | 1.05588E-05 |
| UBR1      | 0.189520048  | 6.627269959 | 1.05653E-05 |
| RHOT2     | 0.249850229  | 8.557212287 | 1.06305E-05 |
| CARD8     | -0.268025431 | 7.471520882 | 1.06642E-05 |
| ELOVL6    | -0.490827841 | 6.790172972 | 1.07967E-05 |
| CSF1      | -0.071527502 | 6.081274861 | 1.08457E-05 |
| SCAMP3    | -0.176651733 | 9.441708335 | 1.08635E-05 |
| NBEAL2    | -0.191595968 | 6.865143582 | 1.0872E-05  |
| IL24      | -0.253211114 | 6.077172207 | 1.09244E-05 |
| GPR64     | -0.153278809 | 6.312873999 | 1.09609E-05 |
| C17ORF75  | 0.316637778  | 7.023348451 | 1.10034E-05 |
| TRIOBP    | -0.191888682 | 8.757274943 | 1.10102E-05 |
| TMEM70    | -0.197379374 | 6.969355635 | 1.10474E-05 |
| MAP1LC3B  | -0.294686697 | 10.12414343 | 1.10559E-05 |
| CDK2AP2   | -0.42268176  | 7.876146909 | 1.10569E-05 |
| SLC39A14  | -0.307480484 | 9.636454775 | 1.10649E-05 |
| ACADVL    | -0.245900497 | 11.59903604 | 1.10807E-05 |
| LOC399888 | 0.136249552  | 6.526622363 | 1.12324E-05 |
| UROD      | 0.202787036  | 10.42162356 | 1.12656E-05 |
| ACSM3     | 0.149348961  | 6.388866958 | 1.13786E-05 |
| ATP5G3    | 0.262588285  | 8.219861221 | 1.14781E-05 |
| MAN2C1    | 0.227461222  | 8.148303662 | 1.15596E-05 |
| COMMD3    | 0.212940838  | 11.46808036 | 1.15958E-05 |
| DDX17     | 0.292198612  | 8.986512603 | 1.1616E-05  |
| DHRS7B    | -0.190396289 | 8.169396248 | 1.16703E-05 |
| C17ORF63  | -0.19178765  | 7.398745746 | 1.17062E-05 |
| CXORF56   | 0.156969794  | 6.677246328 | 1.17797E-05 |
| LOC642489 | -0.338115443 | 8.93635301  | 1.18313E-05 |
| CCT2      | -0.44377926  | 9.714069673 | 1.18448E-05 |
| OR8H3     | -0.147056301 | 6.549169027 | 1.19083E-05 |
| ZBTB8OS   | 0.125820537  | 6.821336431 | 1.19416E-05 |
| ATP6V0A2  | -0.147442955 | 7.48314881  | 1.19588E-05 |
| HNRPC     | 0.309551633  | 7.857006718 | 1.19685E-05 |
| YRDC      | -0.306567652 | 9.669188143 | 1.19908E-05 |
| MYOT      | -0.800006423 | 9.398312314 | 1.20013E-05 |
| CLEC4GP1  | -0.107143755 | 6.078890644 | 1.20298E-05 |
| ZNF444    | 0.237291861  | 6.990898169 | 1.20433E-05 |
| AKR1C2    | -0.290258415 | 7.336288798 | 1.20859E-05 |
| HECTD3    | -0.188113951 | 7.551361462 | 1.20956E-05 |
| ZNF529    | 0.223196532  | 8.586360092 | 1.21408E-05 |
| HSPBAP1   | 0.151842326  | 7.19490651  | 1.21704E-05 |
| CD74      | -0.324249088 | 9.604955277 | 1.21744E-05 |
| SCARNA9   | -0.175202591 | 6.455856447 | 1.21864E-05 |
| TTC17     | -0.19632567  | 7.485221071 | 1.22078E-05 |
| TPO       | -0.130238539 | 6.153623345 | 1.22802E-05 |
| PADI4     | -0.141310292 | 6.133367913 | 1.23269E-05 |
| MST1      | 0.212498647  | 7.12021272  | 1.24049E-05 |
| PIK3R4    | 0.147305599  | 6.868370222 | 1.24723E-05 |
| PTTG2     | 0.201905811  | 8.242334129 | 1.24871E-05 |
| ZNF451    | 0.131780042  | 7.190779925 | 1.25106E-05 |

## DEG.infomation

|           |              |             |             |
|-----------|--------------|-------------|-------------|
| G6PC3     | -0.203891147 | 7.667211694 | 1.26211E-05 |
| AP3D1     | -0.163973879 | 8.145112115 | 1.26285E-05 |
| IDH2      | -0.314068034 | 11.79279149 | 1.26513E-05 |
| AGT       | -0.252138681 | 9.036667602 | 1.26656E-05 |
| MACF1     | 0.212958463  | 8.723170986 | 1.26907E-05 |
| NEDD1     | 0.107232792  | 6.442527851 | 1.27166E-05 |
| SLC27A1   | 0.311747387  | 8.86759593  | 1.28433E-05 |
| BCL2L12   | -0.136253192 | 7.392064791 | 1.28996E-05 |
| TPCN1     | 0.186951549  | 6.742101904 | 1.2927E-05  |
| IRS2      | -0.457617891 | 8.520042268 | 1.29904E-05 |
| PAQR6     | 0.079133766  | 6.105672256 | 1.29904E-05 |
| MLXIPL    | -0.114504016 | 6.246007932 | 1.2995E-05  |
| LOC440160 | 0.207173816  | 6.379605653 | 1.30469E-05 |
| LOC387867 | -0.318274316 | 11.41878081 | 1.31085E-05 |
| LOC650152 | -0.362839042 | 10.45352994 | 1.31092E-05 |
| CDS2      | 0.230469806  | 8.596274791 | 1.32173E-05 |
| CNPY3     | -0.129864169 | 6.823722576 | 1.32578E-05 |
| IL3RA     | -0.143886855 | 6.489960361 | 1.32927E-05 |
| TP53      | -0.129109192 | 6.293229727 | 1.33397E-05 |
| SNORD36A  | -0.15652376  | 6.380583766 | 1.33947E-05 |
| LRRFIP2   | -0.209652883 | 9.210436333 | 1.34094E-05 |
| PTTG3     | -0.212822083 | 6.51901183  | 1.34674E-05 |
| GHR       | 0.340988228  | 8.579531437 | 1.34962E-05 |
| RASIP1    | -0.297211787 | 8.633125006 | 1.35272E-05 |
| CCDC111   | 0.160721457  | 6.888521505 | 1.35422E-05 |
| LOC729905 | -0.15400423  | 6.438790722 | 1.35456E-05 |
| EPN1      | -0.201132741 | 11.82291694 | 1.35802E-05 |
| C9ORF164  | 0.253918802  | 7.368780548 | 1.35938E-05 |
| AGK       | 0.196860482  | 9.039623197 | 1.35969E-05 |
| STK32B    | -0.158526338 | 6.35382894  | 1.36125E-05 |
| TMEM57    | -0.125255544 | 6.846565694 | 1.36328E-05 |
| NHP2L1    | -0.185356178 | 9.816799334 | 1.36964E-05 |
| TAGLN     | -0.519428324 | 10.22267939 | 1.37334E-05 |
| DOK7      | 0.254125464  | 7.688768525 | 1.38038E-05 |
| SALL2     | 0.173506179  | 6.834175314 | 1.38482E-05 |
| MRPL53    | 0.265910407  | 9.839462524 | 1.3887E-05  |
| GRHPR     | 0.219298609  | 8.82999705  | 1.39124E-05 |
| CEP120    | 0.156404427  | 6.442466552 | 1.39636E-05 |
| PPM1F     | -0.278420834 | 9.381821357 | 1.39791E-05 |
| LOC643720 | 0.137014526  | 6.165463988 | 1.40261E-05 |
| HERC4     | 0.128695066  | 7.395518226 | 1.40954E-05 |
| IIP45     | -0.148290506 | 6.606992359 | 1.41282E-05 |
| IKBKE     | -0.112731867 | 6.176481746 | 1.41347E-05 |
| SF3B4     | -0.227758002 | 9.313157213 | 1.41984E-05 |
| SGCE      | 0.307220299  | 8.869209678 | 1.42919E-05 |
| NME3      | 0.231538203  | 9.267361726 | 1.43112E-05 |
| LOC727751 | 0.123957455  | 6.310194481 | 1.43133E-05 |
| SLC27A6   | 0.388900335  | 7.453403855 | 1.43426E-05 |
| AP1G1     | -0.20731152  | 7.598358406 | 1.43615E-05 |
| MRCL3     | 0.371469304  | 14.65730292 | 1.43756E-05 |
| TACC2     | 0.301306814  | 10.15447    | 1.43871E-05 |

## DEG.infomation

|            |              |             |             |
|------------|--------------|-------------|-------------|
| CDKN2AIPNL | -0.319703689 | 11.78575296 | 1.44823E-05 |
| PCDHB4     | -0.167833855 | 6.628659931 | 1.44875E-05 |
| NTNG2      | 0.14563954   | 6.152792102 | 1.45047E-05 |
| ABCA2      | 0.15975082   | 6.451332938 | 1.45611E-05 |
| VAV1       | -0.114966222 | 6.198181485 | 1.45618E-05 |
| DHRS12     | 0.110156647  | 6.714724691 | 1.45899E-05 |
| SERINC2    | -0.143611012 | 6.040757271 | 1.46825E-05 |
| PMS2       | 0.085700194  | 6.411307035 | 1.4768E-05  |
| C16ORF63   | 0.194476588  | 9.761878478 | 1.47699E-05 |
| GBP2       | -0.351668164 | 8.776216583 | 1.47792E-05 |
| LOC645550  | 0.1947511    | 6.53249936  | 1.4789E-05  |
| SPRY2      | -0.313485822 | 9.700577911 | 1.50013E-05 |
| RANBP1     | -0.225727883 | 9.129066482 | 1.50157E-05 |
| ABHD1      | 0.217971998  | 6.951790192 | 1.51305E-05 |
| GALNT11    | 0.348378023  | 8.443687737 | 1.53693E-05 |
| LOC652455  | 0.17592223   | 6.597661822 | 1.53858E-05 |
| FAM171A1   | -0.209790106 | 8.507349521 | 1.53951E-05 |
| CENPM      | -0.103206759 | 6.131160176 | 1.55772E-05 |
| B9D2       | -0.197418184 | 7.181376545 | 1.57256E-05 |
| C6ORF115   | -0.280129402 | 7.087267658 | 1.57684E-05 |
| LOC389137  | 0.158673715  | 7.3806445   | 1.58387E-05 |
| SPHKAP     | 0.564248657  | 10.43082443 | 1.58441E-05 |
| MEF2C      | 0.29190039   | 7.968337485 | 1.58743E-05 |
| MEPCE      | -0.23061886  | 8.863138276 | 1.58971E-05 |
| LOC647856  | -0.28594206  | 10.69321855 | 1.59371E-05 |
| IFI27      | -0.33759123  | 10.92910186 | 1.5946E-05  |
| LOC642267  | 0.100096875  | 6.161741326 | 1.60038E-05 |
| ANKZF1     | 0.106918022  | 6.741890835 | 1.60783E-05 |
| SLC20A1    | -0.32700383  | 8.667062199 | 1.62091E-05 |
| GLYCTK     | -0.107083512 | 6.553594133 | 1.62601E-05 |
| FJX1       | -0.235812751 | 6.635334741 | 1.65497E-05 |
| UST        | -0.168143907 | 6.555984101 | 1.67466E-05 |
| BAK1       | -0.228099605 | 6.813059526 | 1.68093E-05 |
| FLJ20718   | -0.162603554 | 7.29364662  | 1.68214E-05 |
| SMARCA5    | 0.223555203  | 7.724884982 | 1.68398E-05 |
| ZKSCAN3    | 0.128083569  | 6.59029697  | 1.68529E-05 |
| RNPC3      | 0.162064211  | 6.947189316 | 1.6968E-05  |
| HRSP12     | 0.218313987  | 8.042431883 | 1.69711E-05 |
| KLF9       | -0.30731822  | 11.3586261  | 1.69781E-05 |
| COLEC11    | 0.250623648  | 6.841509116 | 1.70575E-05 |
| FGF9       | 0.247451125  | 8.676883641 | 1.70693E-05 |
| VHL        | -0.121002634 | 7.423776806 | 1.70731E-05 |
| MICB       | -0.163924531 | 6.512515779 | 1.70815E-05 |
| EVI1       | 0.333832221  | 8.707814268 | 1.70888E-05 |
| DLAT       | 0.259548966  | 9.882049502 | 1.7107E-05  |
| LOC651881  | -0.114783913 | 6.2863814   | 1.71205E-05 |
| EIF2S3     | 0.23167565   | 10.26002141 | 1.72076E-05 |
| UCHL3      | -0.304730605 | 8.912332417 | 1.7373E-05  |
| GPBP1L1    | 0.153205878  | 7.645535697 | 1.74114E-05 |
| DRD4       | 0.236511565  | 6.598037053 | 1.74146E-05 |
| TRAPPC2    | 0.116507959  | 6.930226702 | 1.74658E-05 |



## DEG.infomation

|           |              |             |             |
|-----------|--------------|-------------|-------------|
| PLA1A     | -0.238893028 | 6.480901706 | 1.75181E-05 |
| LOC654069 | 0.120534097  | 6.199079402 | 1.7562E-05  |
| TLCD1     | -0.141469949 | 6.158491118 | 1.76502E-05 |
| SLAMF6    | -0.109072404 | 6.156523293 | 1.76875E-05 |
| PMS2L2    | 0.130908292  | 6.365678179 | 1.77026E-05 |
| TIA1      | 0.170901833  | 7.943446972 | 1.78051E-05 |
| SPRYD3    | -0.214601923 | 9.459045203 | 1.78964E-05 |
| SHMT2     | -0.272335513 | 9.461381689 | 1.79165E-05 |
| CSGLCA-T  | -0.150857785 | 7.043060741 | 1.79259E-05 |
| LOC654346 | -0.126321774 | 6.153413969 | 1.79316E-05 |
| FXR2      | -0.305398999 | 8.320972609 | 1.79541E-05 |
| THOC2     | 0.167398378  | 7.851430989 | 1.79608E-05 |
| TTC5      | 0.14941176   | 7.25030591  | 1.80013E-05 |
| POLE3     | -0.243207157 | 10.44540071 | 1.80455E-05 |
| ZNF510    | 0.114789297  | 6.42830558  | 1.82308E-05 |
| LOC400406 | -0.233553784 | 6.47446412  | 1.831E-05   |
| KIAA0133  | -0.140801553 | 6.630934463 | 1.83416E-05 |
| CNN2      | -0.227340467 | 7.867636457 | 1.84304E-05 |
| C1ORF168  | 0.423066643  | 7.454389467 | 1.84348E-05 |
| TERF2IP   | 0.233520729  | 9.401644145 | 1.84581E-05 |
| LOC731314 | -0.198456103 | 7.237211043 | 1.84605E-05 |
| CD63      | -0.512909448 | 8.788861917 | 1.85448E-05 |
| COBRA1    | -0.167810385 | 7.737970186 | 1.86723E-05 |
| C6ORF145  | -0.209662645 | 6.416460187 | 1.87521E-05 |
| POLE2     | -0.122249285 | 6.257356176 | 1.88467E-05 |
| KCNJ8     | -0.250003505 | 9.671904269 | 1.88661E-05 |
| CALCOCO2  | -0.316921181 | 8.285390502 | 1.88718E-05 |
| LOC648749 | 0.201009916  | 6.551989232 | 1.88814E-05 |
| YEATS4    | 0.256330381  | 7.982555786 | 1.89778E-05 |
| AGA       | 0.188090733  | 7.284510611 | 1.90182E-05 |
| NUPL2     | 0.158408189  | 8.389539658 | 1.90333E-05 |
| C9ORF142  | -0.172736225 | 8.860791037 | 1.91674E-05 |
| SLC38A8   | -0.193944631 | 6.182685419 | 1.92196E-05 |
| ZFAND5    | 0.205954783  | 12.03635124 | 1.92245E-05 |
| KIF7      | 0.167933073  | 6.61024947  | 1.9244E-05  |
| ANKRD29   | 0.194784536  | 6.949839376 | 1.93077E-05 |
| CCDC104   | 0.158091296  | 7.439437017 | 1.93563E-05 |
| KIAA1324L | 0.15834955   | 6.884585113 | 1.93626E-05 |
| ATG4B     | -0.202809197 | 7.260102921 | 1.93685E-05 |
| SP100     | 0.14956403   | 6.925984439 | 1.93796E-05 |
| MAP4K2    | -0.192303294 | 8.714045279 | 1.94224E-05 |
| LOC650215 | -0.231629768 | 7.930633679 | 1.94496E-05 |
| INPP4B    | 0.302950765  | 8.162047622 | 1.94995E-05 |
| LRRC2     | 0.379967526  | 8.947298579 | 1.95306E-05 |
| GATA4     | 0.22799999   | 7.700248195 | 1.95375E-05 |
| CYBASC3   | -0.154528056 | 7.092444021 | 1.95479E-05 |
| KIAA0319L | 0.152651037  | 7.446372076 | 1.95499E-05 |
| GRIPAP1   | -0.291067462 | 8.882208574 | 1.95616E-05 |
| LRRC3B    | 0.076245533  | 6.104431739 | 1.9635E-05  |
| SLC2A11   | 0.113147611  | 6.691510355 | 1.98257E-05 |
| EGR1      | -0.72408262  | 8.488727696 | 1.98507E-05 |

## DEG.infomation

|           |              |             |             |
|-----------|--------------|-------------|-------------|
| EMD       | -0.208151208 | 10.31393026 | 1.99104E-05 |
| RHBDL1    | 0.161168819  | 6.473074232 | 1.99173E-05 |
| HIST1H4E  | 0.167028558  | 6.468859648 | 1.99465E-05 |
| MGC16169  | 0.172764341  | 7.393301048 | 2.00795E-05 |
| GUCA1B    | 0.151088047  | 6.51808812  | 2.01484E-05 |
| LOC728689 | 0.228267921  | 7.073633557 | 2.01577E-05 |
| DDAH1     | 0.50539273   | 8.299700322 | 2.01737E-05 |
| C14ORF153 | -0.303588225 | 9.865563296 | 2.02358E-05 |
| TRIM56    | -0.241793487 | 7.587600222 | 2.02856E-05 |
| DYSFIP1   | -0.079318551 | 6.085066383 | 2.03003E-05 |
| MLL       | 0.177443642  | 7.030238328 | 2.03374E-05 |
| NMRAL1    | -0.441846586 | 8.599322781 | 2.0351E-05  |
| LOC653226 | 0.226662359  | 10.91573745 | 2.04947E-05 |
| FTO       | 0.20734218   | 7.949863893 | 2.05112E-05 |
| UTP18     | -0.183857728 | 6.807401887 | 2.07775E-05 |
| CHD6      | 0.224181437  | 7.152476593 | 2.07885E-05 |
| PRUNE     | 0.228127612  | 8.354294009 | 2.08073E-05 |
| HLA-DRB6  | -0.408140426 | 7.988851437 | 2.09075E-05 |
| ATP6V1A   | -0.220683923 | 9.252912466 | 2.09949E-05 |
| C5ORF13   | 0.429311247  | 9.819474661 | 2.10903E-05 |
| RASGRP2   | -0.132130576 | 6.50465863  | 2.11196E-05 |
| PLEKHA4   | 0.339154585  | 8.053155759 | 2.11841E-05 |
| C18ORF55  | 0.19548183   | 11.11890328 | 2.1211E-05  |
| TRAM1     | -0.238235459 | 11.19906769 | 2.12638E-05 |
| GOLGA6B   | 0.164333794  | 6.530768    | 2.12867E-05 |
| C3ORF18   | 0.29139631   | 7.477479332 | 2.13298E-05 |
| TMC6      | 0.306074442  | 8.329310816 | 2.13712E-05 |
| C14ORF180 | 0.459071155  | 9.460729801 | 2.13725E-05 |
| SLFN11    | -0.197209996 | 8.258050533 | 2.13998E-05 |
| HLA-DMA   | -0.389144244 | 9.698931992 | 2.14378E-05 |
| IGSF6     | -0.183806499 | 6.253375257 | 2.15132E-05 |
| ECD       | 0.129044379  | 7.155470069 | 2.15434E-05 |
| LOC221442 | 0.209122812  | 6.991675801 | 2.15631E-05 |
| OXSR1     | -0.226816944 | 9.643094846 | 2.16108E-05 |
| LOC645937 | -0.14888596  | 6.736444614 | 2.16964E-05 |
| MKRN1     | 0.189659757  | 11.06098221 | 2.17561E-05 |
| ZKSCAN2   | 0.181523522  | 7.856353799 | 2.17833E-05 |
| TFF3      | 0.39707575   | 7.553332907 | 2.17855E-05 |
| PDE6A     | 0.122169788  | 6.183062727 | 2.18877E-05 |
| LOC653082 | -0.163626857 | 6.258515171 | 2.19342E-05 |
| S1PR4     | -0.115343865 | 6.194343574 | 2.20946E-05 |
| WDR27     | 0.125334731  | 6.398016944 | 2.2112E-05  |
| S100PBP   | 0.079065658  | 6.736335044 | 2.21809E-05 |
| RBMS3     | 0.12484526   | 6.642795399 | 2.22567E-05 |
| LOC201725 | 0.157500264  | 6.692703106 | 2.22657E-05 |
| MAMDC2    | 0.387072407  | 8.323415473 | 2.22754E-05 |
| PCDH20    | -0.584662639 | 7.049332018 | 2.22759E-05 |
| SNORD4A   | -0.129375835 | 6.266141702 | 2.2288E-05  |
| JMJD6     | -0.120042538 | 6.466255696 | 2.23314E-05 |
| CDK6      | -0.254001317 | 7.855801125 | 2.24983E-05 |
| EXOC6     | 0.090177239  | 6.762429132 | 2.25134E-05 |

## DEG.infomation

|           |              |             |             |
|-----------|--------------|-------------|-------------|
| BCDIN3D   | 0.147973844  | 7.739722508 | 2.25446E-05 |
| MYO5B     | 0.092940532  | 6.151861458 | 2.28071E-05 |
| CXCL1     | -0.177016278 | 6.14082363  | 2.28125E-05 |
| CPNE4     | -0.699600245 | 7.87995378  | 2.28188E-05 |
| EBPL      | -0.240997804 | 7.441794099 | 2.28772E-05 |
| CCNDBP1   | 0.256584472  | 9.918120653 | 2.29738E-05 |
| VDAC1     | 0.188184897  | 12.3072244  | 2.30418E-05 |
| LOC643031 | 0.26451811   | 13.69949142 | 2.31187E-05 |
| IL1RN     | -0.104623131 | 6.187518748 | 2.31702E-05 |
| MICALL2   | -0.10519123  | 6.36753231  | 2.32025E-05 |
| RPS5      | -0.224514478 | 12.40257359 | 2.32073E-05 |
| LRRC20    | 0.323392639  | 9.01931273  | 2.32337E-05 |
| TUBG2     | 0.206044859  | 8.138903054 | 2.32701E-05 |
| SERHL     | 0.066155487  | 6.24998773  | 2.33225E-05 |
| RBMS2     | 0.214892731  | 7.276528261 | 2.35177E-05 |
| TRIM24    | 0.135413588  | 7.081637208 | 2.35829E-05 |
| ERCC1     | -0.19073498  | 9.390740451 | 2.36802E-05 |
| REXO2     | 0.159782267  | 11.96310506 | 2.37625E-05 |
| ZNF200    | 0.093876119  | 6.688338326 | 2.37964E-05 |
| HCG4      | -0.306052466 | 7.737984559 | 2.38112E-05 |
| SERTAD2   | 0.208928032  | 9.944466818 | 2.38149E-05 |
| FKBP1A    | -0.250427319 | 8.574808734 | 2.39906E-05 |
| NME4      | 0.244879964  | 9.642832577 | 2.4027E-05  |
| NFKBIB    | -0.12833747  | 6.746690768 | 2.41446E-05 |
| IMMT      | 0.205760029  | 10.87189081 | 2.42099E-05 |
| HELLS     | -0.085159326 | 6.037689186 | 2.43376E-05 |
| B4GALT7   | -0.209310578 | 7.983661822 | 2.43939E-05 |
| LOC650826 | 0.139870808  | 6.480709104 | 2.44879E-05 |
| PPHLN1    | 0.12718491   | 7.619313581 | 2.4494E-05  |
| MRPS26    | 0.195989878  | 9.687768848 | 2.4533E-05  |
| CSNK1E    | -0.186619054 | 9.108989843 | 2.45752E-05 |
| LOC153561 | -0.183635413 | 6.845836299 | 2.45852E-05 |
| PDE3B     | 0.166573463  | 6.589765159 | 2.47775E-05 |
| CABP1     | -0.067575084 | 6.101219314 | 2.47942E-05 |
| ITGAX     | -0.109369477 | 6.155166596 | 2.48714E-05 |
| WIBG      | -0.147734233 | 7.088168204 | 2.50529E-05 |
| TPD52L2   | -0.23108145  | 9.818190425 | 2.50564E-05 |
| TCAP      | -0.39584082  | 12.75881558 | 2.5059E-05  |
| ARL1      | 0.169775741  | 9.923974238 | 2.50921E-05 |
| PLCB4     | 0.191838148  | 6.855689423 | 2.51514E-05 |
| C2CD2     | -0.198090624 | 7.511435331 | 2.52599E-05 |
| CHMP4A    | 0.198851483  | 8.908006927 | 2.5268E-05  |
| RAPSN     | 0.150280249  | 6.726900034 | 2.53724E-05 |
| COQ5      | 0.278632895  | 10.29718376 | 2.54404E-05 |
| POMZP3    | 0.398608135  | 6.798226113 | 2.5484E-05  |
| ZBED5     | 0.24257206   | 9.071368623 | 2.54857E-05 |
| EMILIN3   | 0.192220438  | 6.507680232 | 2.55488E-05 |
| TXN       | -0.254097653 | 10.61617035 | 2.55604E-05 |
| TCEA2     | 0.176780371  | 7.482046147 | 2.56404E-05 |
| NR4A3     | -0.140943496 | 6.101120892 | 2.60158E-05 |
| KCNN3     | 0.131696648  | 6.455730696 | 2.60337E-05 |

## DEG.infomation

|           |              |             |             |
|-----------|--------------|-------------|-------------|
| SLC35E3   | 0.195177232  | 8.114282671 | 2.61214E-05 |
| C10ORF54  | -0.312618641 | 7.929517232 | 2.61229E-05 |
| NRBP2     | 0.271297348  | 8.616157771 | 2.61716E-05 |
| BCKDHA    | 0.247634854  | 10.50002489 | 2.61774E-05 |
| TUSC3     | 0.233699413  | 8.112040869 | 2.62244E-05 |
| DNLZ      | -0.291185524 | 9.804191322 | 2.62715E-05 |
| FCER1A    | 0.408860778  | 7.242949066 | 2.63978E-05 |
| UCK2      | -0.478910834 | 7.777243223 | 2.64589E-05 |
| MTHFS     | 0.208754096  | 8.296166717 | 2.65832E-05 |
| MBD5      | 0.077105261  | 6.311719701 | 2.66599E-05 |
| TMEM139   | 0.174668444  | 6.323301092 | 2.66696E-05 |
| WBP2      | -0.224081283 | 12.39594507 | 2.67786E-05 |
| TBRG4     | -0.189500656 | 8.22255142  | 2.70566E-05 |
| MRPL36    | -0.200118257 | 10.56947419 | 2.71845E-05 |
| TGFBI     | -0.384227133 | 10.35901771 | 2.73439E-05 |
| SLC29A1   | 0.287427857  | 8.358069914 | 2.73859E-05 |
| LOC647834 | 0.157239071  | 6.879277191 | 2.7421E-05  |
| SNORD36C  | -0.153796955 | 6.240191788 | 2.74391E-05 |
| KIAA0195  | 0.199297279  | 7.506187992 | 2.74975E-05 |
| GALNTL4   | 0.30284665   | 8.161342104 | 2.75739E-05 |
| UBE2D3    | -0.202923804 | 10.09125505 | 2.75864E-05 |
| CATSPER2  | -0.338465688 | 10.63488474 | 2.76506E-05 |
| JUP       | 0.24701658   | 9.11067444  | 2.76696E-05 |
| CGNL1     | 0.502020131  | 10.38395395 | 2.77822E-05 |
| SOX6      | 0.087657902  | 6.136455143 | 2.78723E-05 |
| XRN2      | -0.20004403  | 7.401311671 | 2.79964E-05 |
| HDGFRP3   | 0.214702222  | 7.81135302  | 2.81449E-05 |
| FYN       | 0.119276275  | 7.415519291 | 2.81899E-05 |
| QKI       | 0.170556126  | 7.232848268 | 2.82256E-05 |
| LCN2      | -0.151479637 | 6.063513975 | 2.82535E-05 |
| C11ORF65  | 0.107224616  | 6.305436899 | 2.83076E-05 |
| GPAA1     | -0.207796665 | 8.692639315 | 2.83183E-05 |
| ZNF259    | -0.296038651 | 7.395572896 | 2.83355E-05 |
| KLHL4     | 0.08258651   | 6.199604236 | 2.83505E-05 |
| SNX16     | 0.171874559  | 7.003712299 | 2.83927E-05 |
| MRPL11    | 0.144530592  | 9.213486777 | 2.83947E-05 |
| RP2       | -0.185978085 | 6.583578751 | 2.84052E-05 |
| USP12     | -0.18220809  | 6.111111053 | 2.8488E-05  |
| PRDX3     | 0.328958038  | 11.28767791 | 2.84882E-05 |
| PLN       | 0.330043209  | 10.43330644 | 2.84894E-05 |
| CACNA1B   | 0.358857222  | 8.46338235  | 2.86384E-05 |
| PACS1     | 0.278971947  | 7.865711813 | 2.86735E-05 |
| TLE4      | 0.12376291   | 7.200163903 | 2.891E-05   |
| LACTB2    | 0.358136145  | 9.889550161 | 2.89841E-05 |
| DCTN1     | 0.225070546  | 9.02622462  | 2.90198E-05 |
| MRPL3     | -0.223458488 | 9.750835034 | 2.90344E-05 |
| CAPN2     | -0.126858519 | 6.958698205 | 2.90847E-05 |
| C10ORF119 | -0.14354594  | 6.510243913 | 2.91102E-05 |
| LIMS1     | -0.244031532 | 8.498680725 | 2.91532E-05 |
| LOC390705 | 0.216331896  | 7.748970835 | 2.91541E-05 |
| PAIP2     | 0.25402765   | 9.664648043 | 2.91641E-05 |

## DEG.infomation

|           |              |             |             |
|-----------|--------------|-------------|-------------|
| LOC650111 | -0.129053325 | 6.338618252 | 2.93866E-05 |
| COQ10A    | 0.411040666  | 10.83806206 | 2.94105E-05 |
| COASY     | -0.154814252 | 8.209345954 | 2.94308E-05 |
| ASB13     | -0.134788709 | 7.349443026 | 2.94417E-05 |
| WBP4      | 0.165391098  | 9.254550189 | 2.94523E-05 |
| RHBDL3    | -0.194574714 | 6.35755567  | 2.94607E-05 |
| ITGA2     | -0.241983121 | 6.378624873 | 2.97754E-05 |
| ANXA7     | 0.199597455  | 9.755679809 | 2.97999E-05 |
| BAT1      | 0.201331688  | 8.831915437 | 2.98753E-05 |
| TNFRSF25  | 0.188091988  | 7.202385437 | 2.99067E-05 |
| MYL3      | -0.225099391 | 14.20952614 | 2.99699E-05 |
| NUAK2     | 0.081380102  | 6.073690536 | 2.99917E-05 |
| KLHL11    | 0.085992656  | 6.243960403 | 3.00844E-05 |
| DDX3X     | -0.25955238  | 9.293852132 | 3.00882E-05 |
| USP15     | 0.238632119  | 8.125331254 | 3.01289E-05 |
| SMARCC1   | -0.263354357 | 7.949363945 | 3.01361E-05 |
| THAP4     | -0.136293294 | 6.358279546 | 3.02491E-05 |
| PEBP1     | 0.314009188  | 10.74747863 | 3.02563E-05 |
| FGFR3     | 0.210354049  | 7.029120869 | 3.03167E-05 |
| LOC51057  | 0.125603921  | 6.323332647 | 3.04827E-05 |
| PTPRD     | 0.185616461  | 6.924382989 | 3.05642E-05 |
| SH3GLB2   | 0.208216434  | 9.578011704 | 3.05891E-05 |
| LOC388524 | -0.213537883 | 12.09646143 | 3.06353E-05 |
| LOC729776 | 0.236132372  | 9.052531659 | 3.07714E-05 |
| TXNL2     | -0.246354416 | 8.575108623 | 3.07794E-05 |
| LOC643665 | 0.12981686   | 6.534747282 | 3.08991E-05 |
| TTL12     | -0.214750282 | 7.191587621 | 3.09651E-05 |
| ATG7      | -0.144639352 | 7.902167997 | 3.09674E-05 |
| C3ORF34   | -0.300800955 | 10.65228614 | 3.11351E-05 |
| BCL9L     | -0.206476109 | 6.680507089 | 3.1224E-05  |
| PAK1IP1   | -0.224492771 | 7.408612315 | 3.12792E-05 |
| ZBTB17    | -0.218740368 | 7.687471357 | 3.13055E-05 |
| COL20A1   | 0.132247089  | 6.522406137 | 3.13313E-05 |
| KIAA0430  | 0.189998701  | 9.808037285 | 3.15977E-05 |
| ZNF441    | 0.118194502  | 6.172299313 | 3.16164E-05 |
| FNTB      | 0.191371371  | 8.486541845 | 3.17138E-05 |
| TLR2      | -0.114600084 | 5.963211546 | 3.17608E-05 |
| C7ORF50   | 0.218190208  | 11.19329945 | 3.18577E-05 |
| IQGAP1    | -0.22463916  | 7.706999009 | 3.1987E-05  |
| DMAP1     | 0.17038881   | 8.537780009 | 3.20209E-05 |
| HIGD2A    | 0.327546667  | 11.50870344 | 3.21159E-05 |
| KLHL28    | 0.167999505  | 7.303622752 | 3.21369E-05 |
| EXOC1     | 0.094713855  | 7.224878789 | 3.21712E-05 |
| CIDEC     | -0.383835164 | 6.342252793 | 3.23698E-05 |
| THTPA     | 0.143989018  | 6.471397578 | 3.25362E-05 |
| ERLIN2    | 0.091887055  | 6.830739206 | 3.25459E-05 |
| CCNJ      | -0.147217926 | 5.895549109 | 3.25884E-05 |
| AQP7P2    | 0.341838817  | 8.529686202 | 3.26084E-05 |
| BBX       | 0.23677243   | 9.033744814 | 3.26663E-05 |
| GSTP1     | -0.169170751 | 11.56720716 | 3.27025E-05 |
| TCF20     | -0.069589607 | 6.819559138 | 3.27198E-05 |

## DEG.infomation

|           |              |             |             |
|-----------|--------------|-------------|-------------|
| OXCT2     | -0.368303447 | 7.533521106 | 3.28004E-05 |
| KIAA1618  | 0.141677329  | 7.282247354 | 3.28062E-05 |
| FAM14A    | 0.355899577  | 8.823372698 | 3.29369E-05 |
| CALD1     | 0.207115621  | 9.961637384 | 3.29737E-05 |
| BCL2L1    | -0.282557642 | 9.417965201 | 3.29897E-05 |
| UBR5      | 0.122797773  | 7.802877373 | 3.30885E-05 |
| CEP350    | 0.22358981   | 7.862713765 | 3.30972E-05 |
| NET1      | 0.174724177  | 7.445947681 | 3.3201E-05  |
| RETSAT    | -0.379592124 | 6.94239597  | 3.33779E-05 |
| TK1       | -0.131960303 | 6.298648806 | 3.33939E-05 |
| NMT2      | 0.168585259  | 7.879834222 | 3.3418E-05  |
| DEF6      | -0.1421465   | 6.401166724 | 3.3451E-05  |
| MTX1      | -0.107714649 | 7.631821848 | 3.3661E-05  |
| RPIA      | -0.206036837 | 8.519516734 | 3.41311E-05 |
| APEX2     | -0.150009657 | 7.828867913 | 3.43659E-05 |
| MTX2      | 0.181629006  | 9.678971101 | 3.43709E-05 |
| LOC648304 | 0.10403956   | 6.279365364 | 3.44956E-05 |
| LRBA      | 0.178943374  | 7.886689222 | 3.45084E-05 |
| STK17B    | -0.092237185 | 6.118739869 | 3.45636E-05 |
| TUBB4     | -0.114635471 | 6.200311098 | 3.46525E-05 |
| LOC285053 | -0.266486138 | 12.19212557 | 3.47142E-05 |
| FAM40B    | -0.244875225 | 7.559491554 | 3.47906E-05 |
| DKK1      | -0.259504172 | 6.137425891 | 3.48589E-05 |
| PGR       | 0.106103623  | 6.381411087 | 3.48832E-05 |
| MED27     | -0.127935989 | 7.028838162 | 3.48973E-05 |
| TEK       | -0.252584444 | 8.963712364 | 3.49083E-05 |
| SGMS2     | -0.283986274 | 6.42981682  | 3.4961E-05  |
| SP4       | 0.204886631  | 7.13772487  | 3.50041E-05 |
| BMS1      | -0.185188285 | 8.656814789 | 3.50087E-05 |
| C14ORF93  | 0.147210731  | 7.570092737 | 3.50433E-05 |
| C16ORF80  | 0.245479838  | 9.070229988 | 3.52834E-05 |
| HMBS      | -0.144409228 | 7.615969677 | 3.53467E-05 |
| ZFP91     | 0.142999186  | 9.959845422 | 3.54813E-05 |
| PSMC3IP   | 0.080596693  | 6.156199687 | 3.55923E-05 |
| ZNF428    | -0.374110978 | 10.20958026 | 3.56454E-05 |
| ALG8      | -0.116694116 | 7.540833574 | 3.5737E-05  |
| PPP1R12C  | 0.283137565  | 7.609926462 | 3.57728E-05 |
| SOD2      | -0.241676098 | 8.791239075 | 3.61971E-05 |
| IGFBP3    | 0.521583226  | 9.27609558  | 3.62673E-05 |
| ARC       | -0.172009301 | 6.289023623 | 3.64259E-05 |
| ERMP1     | 0.316968268  | 7.475051632 | 3.65061E-05 |
| LOC652815 | 0.216200007  | 6.709907928 | 3.67271E-05 |
| COX17     | 0.195355104  | 12.46809691 | 3.67472E-05 |
| CXORF45   | 0.165466437  | 7.200258175 | 3.69068E-05 |
| BRPF3     | -0.201496453 | 8.225433741 | 3.69185E-05 |
| AP1G2     | -0.096762533 | 6.262258865 | 3.69255E-05 |
| SCYL1     | -0.154624932 | 9.87343688  | 3.70928E-05 |
| DUSP19    | -0.316756539 | 10.98115387 | 3.7184E-05  |
| KCNC4     | 0.07403996   | 6.157676539 | 3.72803E-05 |
| LOC647210 | -0.157583407 | 6.498269746 | 3.72868E-05 |
| LOC149134 | 0.176748728  | 6.709663684 | 3.74386E-05 |

## DEG.infomation

|           |              |             |             |
|-----------|--------------|-------------|-------------|
| MUT       | 0.220597761  | 8.403045995 | 3.74679E-05 |
| SAFB      | -0.18694172  | 9.208508894 | 3.74916E-05 |
| TOP2B     | 0.209241917  | 10.35530838 | 3.75016E-05 |
| KIAA0556  | 0.202867734  | 7.898761017 | 3.76777E-05 |
| ASIP      | 0.557113277  | 9.515075376 | 3.78041E-05 |
| DSEL      | 0.113922494  | 6.300986209 | 3.78879E-05 |
| PGS1      | -0.142315702 | 7.801730722 | 3.81742E-05 |
| PIGK      | 0.212296147  | 7.527354848 | 3.8177E-05  |
| DHX34     | -0.108410916 | 6.584207964 | 3.82068E-05 |
| AKNA      | -0.15082575  | 6.71582335  | 3.82887E-05 |
| TBX15     | -0.123974529 | 6.24384007  | 3.83084E-05 |
| SNORD14B  | -0.113035936 | 6.080204706 | 3.83265E-05 |
| PALLD     | -0.189746337 | 12.18792331 | 3.85546E-05 |
| RNF11     | 0.150977074  | 7.348326514 | 3.85603E-05 |
| TNFSF4    | -0.095469215 | 6.252588009 | 3.87117E-05 |
| PCNA      | 0.16097577   | 7.329871818 | 3.87903E-05 |
| RPL7L1    | -0.228884971 | 11.57082034 | 3.88642E-05 |
| P4HB      | -0.206702283 | 10.86663634 | 3.88695E-05 |
| RUVBL2    | -0.235110721 | 7.875549986 | 3.91298E-05 |
| SRP14     | 0.190003067  | 12.4048025  | 3.95028E-05 |
| MAPRE2    | 0.25516037   | 10.57050537 | 3.95218E-05 |
| CTHRC1    | 0.46650225   | 7.949652208 | 3.95284E-05 |
| CYP2R1    | -0.153115664 | 7.096015809 | 3.9671E-05  |
| XPO6      | -0.169571721 | 7.630012349 | 3.97423E-05 |
| P8        | 0.372934897  | 7.913755395 | 3.97477E-05 |
| TRIB3     | -0.244690436 | 6.68432574  | 3.98273E-05 |
| ASXL1     | -0.134757917 | 7.346644213 | 4.01259E-05 |
| ALKBH2    | -0.183782452 | 7.501497256 | 4.04648E-05 |
| WDR69     | -0.147304584 | 5.983221572 | 4.05838E-05 |
| ARL15     | 0.129274904  | 6.829305786 | 4.064E-05   |
| C16ORF58  | -0.219214158 | 9.15974831  | 4.0699E-05  |
| TLL1      | -0.170584749 | 5.963586717 | 4.09836E-05 |
| MOSPD2    | 0.112963217  | 6.746724457 | 4.1073E-05  |
| AVEN      | -0.205805444 | 7.760507013 | 4.17862E-05 |
| FLJ36070  | 0.237918238  | 6.965825507 | 4.181E-05   |
| RNASEL    | 0.176104698  | 7.311360363 | 4.20277E-05 |
| SIRT7     | -0.115546642 | 6.224037658 | 4.23927E-05 |
| MESDC1    | -0.156929369 | 6.385485943 | 4.26205E-05 |
| LAMB2     | 0.381475754  | 10.10305687 | 4.26464E-05 |
| GAS7      | -0.215486098 | 7.225718594 | 4.26482E-05 |
| SP110     | -0.183669023 | 7.457398069 | 4.26492E-05 |
| ODF2      | 0.126209806  | 7.120048796 | 4.26604E-05 |
| KRT10     | -0.243876439 | 9.502323429 | 4.27795E-05 |
| ZFP1      | 0.148009193  | 6.516765925 | 4.27909E-05 |
| TBL2      | -0.152083558 | 7.143851783 | 4.27933E-05 |
| MTERFD1   | -0.221860268 | 9.036469592 | 4.28501E-05 |
| LOC646567 | -0.312727098 | 8.426012326 | 4.33513E-05 |
| C12ORF45  | -0.193468322 | 7.427308844 | 4.37578E-05 |
| FLJ46230  | -0.14620253  | 6.476905136 | 4.39201E-05 |
| MICAL1    | -0.165332518 | 6.689571914 | 4.39935E-05 |
| C6ORF173  | -0.138916396 | 6.509169435 | 4.40105E-05 |

## DEG.infomation

|           |              |             |             |
|-----------|--------------|-------------|-------------|
| NUP85     | -0.15492992  | 8.283680786 | 4.4085E-05  |
| DCUN1D1   | 0.148479241  | 6.808938937 | 4.41634E-05 |
| RPL18A    | -0.199204974 | 13.33280196 | 4.45516E-05 |
| XRCC2     | -0.306066277 | 8.657671776 | 4.46062E-05 |
| GMEB2     | -0.15792553  | 8.234261705 | 4.46444E-05 |
| UBR2      | 0.140890775  | 8.427577191 | 4.46924E-05 |
| TUBA8     | 0.242902493  | 6.850026534 | 4.4792E-05  |
| ABCA10    | 0.177053279  | 6.458040423 | 4.49761E-05 |
| DCTN4     | 0.218794228  | 8.60205762  | 4.50079E-05 |
| GNPAT     | 0.136282421  | 9.328854473 | 4.51739E-05 |
| C6ORF47   | -0.294062911 | 7.547479399 | 4.56037E-05 |
| FABP6     | -0.155429486 | 6.275951015 | 4.57262E-05 |
| P2RY6     | -0.081562418 | 6.324221901 | 4.60365E-05 |
| INPPL1    | -0.219764155 | 9.737745814 | 4.61083E-05 |
| TMEM14B   | 0.295649417  | 11.2085798  | 4.62177E-05 |
| PTGS1     | -0.152597967 | 6.579638256 | 4.65105E-05 |
| EFHC1     | 0.129833585  | 6.653697594 | 4.65806E-05 |
| PTPRE     | -0.231940184 | 8.056921912 | 4.65936E-05 |
| C12ORF49  | -0.133108328 | 6.259691334 | 4.66389E-05 |
| DNAH1     | 0.144727675  | 6.69823435  | 4.69427E-05 |
| TMED5     | -0.363303392 | 9.301139469 | 4.69742E-05 |
| ANKRD40   | 0.135071052  | 7.012491768 | 4.70353E-05 |
| FANCG     | -0.173593444 | 6.84782503  | 4.70943E-05 |
| HOOK1     | -0.195153056 | 6.591430554 | 4.71355E-05 |
| CHCHD7    | 0.201059326  | 8.247233095 | 4.71522E-05 |
| DENND1B   | 0.117679001  | 6.119032507 | 4.72668E-05 |
| C9ORF86   | -0.188883258 | 8.023949607 | 4.76634E-05 |
| YARS2     | -0.123016175 | 8.713722757 | 4.77773E-05 |
| PPAPDC2   | 0.118457664  | 6.796868311 | 4.82212E-05 |
| IRAK2     | -0.231320996 | 6.892718323 | 4.83226E-05 |
| C6ORF1    | 0.097890391  | 6.550041599 | 4.84234E-05 |
| SUPT16H   | 0.206748288  | 9.187806927 | 4.84651E-05 |
| PUS10     | 0.094736943  | 6.223029831 | 4.87838E-05 |
| SMCR7     | 0.102977657  | 6.201682991 | 4.89374E-05 |
| ANGPTL7   | 0.16356321   | 6.394061703 | 4.94926E-05 |
| TBX3      | 0.188988399  | 6.884741455 | 4.95447E-05 |
| EPPB9     | 0.19331779   | 6.405283799 | 4.95688E-05 |
| ITFG1     | 0.22760735   | 8.670781849 | 4.96098E-05 |
| CASQ2     | 0.222988819  | 13.59459826 | 4.9712E-05  |
| OAT       | 0.193846204  | 8.872006004 | 4.9734E-05  |
| TRIM29    | 0.190259027  | 7.511729128 | 4.982E-05   |
| PCNP      | 0.210572119  | 10.58930854 | 4.98467E-05 |
| RLN2      | 0.089332765  | 6.08861551  | 4.99069E-05 |
| LOC644254 | 0.218040203  | 6.411022295 | 5.03216E-05 |
| SMC3      | 0.13341967   | 7.732539805 | 5.03317E-05 |
| WDR35     | 0.118462473  | 6.731020378 | 5.0489E-05  |
| ANO10     | -0.146006783 | 6.877614598 | 5.06058E-05 |
| ZNF137    | 0.114889743  | 6.419313572 | 5.07319E-05 |
| CSNK1G2   | -0.321075993 | 9.524497214 | 5.09312E-05 |
| PAN2      | 0.156005582  | 7.835784761 | 5.1163E-05  |
| EIF3C     | 0.255174398  | 7.197726478 | 5.13709E-05 |



## DEG.infomation

|           |              |             |             |
|-----------|--------------|-------------|-------------|
| TIGA1     | 0.250078563  | 9.586406994 | 5.13988E-05 |
| ARCN1     | -0.22789574  | 9.982403387 | 5.14003E-05 |
| C15ORF15  | 0.204052787  | 10.75742463 | 5.14538E-05 |
| MAP3K7    | 0.159635135  | 8.103432573 | 5.15077E-05 |
| CBARA1    | 0.190413781  | 7.93492534  | 5.16255E-05 |
| ANO7      | -0.086681224 | 6.345383253 | 5.17135E-05 |
| SPR       | 0.234272504  | 8.086255083 | 5.20534E-05 |
| LOC441108 | 0.101931014  | 6.103350792 | 5.2065E-05  |
| KLHL30    | 0.229737065  | 7.999609934 | 5.20844E-05 |
| GAS8      | 0.248141805  | 7.77242983  | 5.21667E-05 |
| C1ORF181  | 0.173876406  | 8.334403189 | 5.24075E-05 |
| CLEC7A    | -0.069207768 | 6.108302435 | 5.246E-05   |
| C1ORF163  | -0.15495775  | 7.19514286  | 5.25094E-05 |
| PTX3      | -0.187784153 | 5.983427566 | 5.26477E-05 |
| TMEM86A   | 0.168165728  | 6.366001722 | 5.29094E-05 |
| SOX13     | -0.180624862 | 7.392990682 | 5.33278E-05 |
| OAZ1      | -0.134809712 | 14.10520209 | 5.38662E-05 |
| LOC653505 | -0.287806241 | 9.671444161 | 5.39214E-05 |
| C3ORF45   | 0.38554456   | 7.463248645 | 5.39984E-05 |
| ZCWPW1    | 0.197472178  | 7.480040176 | 5.4042E-05  |
| ANXA2P1   | -0.488348669 | 9.007658026 | 5.41672E-05 |
| NCOA2     | 0.174942758  | 6.356027841 | 5.41811E-05 |
| R3HDM2    | 0.163012801  | 7.023008842 | 5.42689E-05 |
| ZSWIM5    | 0.136985976  | 6.365149902 | 5.44942E-05 |
| PPP1R16B  | 0.259010007  | 7.469288576 | 5.48538E-05 |
| BEXL1     | 0.269758311  | 9.356588924 | 5.50653E-05 |
| CPXM1     | -0.138445198 | 6.234053803 | 5.55406E-05 |
| CDGAP     | -0.205537495 | 6.809988566 | 5.56056E-05 |
| LCMT2     | 0.172486775  | 7.497217884 | 5.59951E-05 |
| RAB7A     | 0.177422414  | 11.88859616 | 5.61671E-05 |
| KIF1A     | 0.331073752  | 6.647990628 | 5.63124E-05 |
| IFT81     | 0.086195176  | 6.284965442 | 5.63372E-05 |
| COL5A3    | -0.187148226 | 6.441308691 | 5.635E-05   |
| PSMD2     | -0.216681226 | 9.880236736 | 5.6475E-05  |
| TCEAL2    | 0.256131989  | 6.616333281 | 5.64907E-05 |
| LOC728153 | -0.155386354 | 7.36688681  | 5.65439E-05 |
| UTX       | 0.205332996  | 7.143183283 | 5.66362E-05 |
| NXN       | -0.184130009 | 7.388523908 | 5.68728E-05 |
| PMP22     | -0.202391809 | 10.36696655 | 5.73618E-05 |
| SNORD46   | -0.149526368 | 6.069632984 | 5.74284E-05 |
| NOL14     | -0.178106432 | 7.575096435 | 5.7464E-05  |
| LOC648984 | -0.153998967 | 6.434555305 | 5.75174E-05 |
| MEGF9     | -0.104150796 | 6.144401713 | 5.78958E-05 |
| C15ORF57  | 0.239412665  | 7.174742302 | 5.80083E-05 |
| CWF19L2   | 0.161783475  | 7.64888236  | 5.81315E-05 |
| C1ORF122  | 0.215124751  | 9.077416971 | 5.82176E-05 |
| ESRRA     | -0.193687407 | 8.91669745  | 5.82258E-05 |
| N4BP2L1   | 0.115520557  | 6.540606585 | 5.82703E-05 |
| POLR2L    | 0.199406154  | 7.692799844 | 5.83917E-05 |
| NAPEPLD   | 0.194593955  | 6.789467815 | 5.84763E-05 |
| ALDH3B1   | 0.092125458  | 6.338462152 | 5.89938E-05 |

## DEG.infomation

|           |              |             |             |
|-----------|--------------|-------------|-------------|
| SLC6A18   | 0.130757632  | 6.383186475 | 5.90489E-05 |
| BXDC1     | -0.261668981 | 9.9005104   | 5.93735E-05 |
| KIAA0391  | 0.150857241  | 8.807459012 | 5.9467E-05  |
| ZMYM1     | 0.158096863  | 7.190925502 | 5.95598E-05 |
| PCNX      | -0.15904661  | 8.698280796 | 5.97213E-05 |
| FOSB      | -0.591727222 | 6.906219586 | 6.00981E-05 |
| SYNJ2     | 0.151576891  | 7.133051449 | 6.01108E-05 |
| PI4K2B    | -0.108313788 | 6.414906065 | 6.03011E-05 |
| C7ORF20   | -0.092001732 | 6.727097132 | 6.06041E-05 |
| TBCC      | 0.179741638  | 7.860280162 | 6.07409E-05 |
| TRIM68    | 0.134024925  | 8.37279718  | 6.08895E-05 |
| CSTF3     | 0.111101275  | 7.704608958 | 6.09371E-05 |
| TCEB1     | -0.219918092 | 10.74046156 | 6.11979E-05 |
| BRPF1     | -0.145364793 | 8.934742974 | 6.14401E-05 |
| CENTA1    | 0.252367527  | 9.079875976 | 6.2021E-05  |
| LOC401115 | -0.385170996 | 8.568151362 | 6.21919E-05 |
| IRX4      | -0.260576412 | 8.57640509  | 6.23326E-05 |
| SRXN1     | -0.285620267 | 8.079253851 | 6.25026E-05 |
| KIAA0892  | 0.22162335   | 7.99813148  | 6.26632E-05 |
| WDR91     | 0.125986191  | 6.58476599  | 6.27652E-05 |
| CASP1     | -0.166994238 | 7.171619624 | 6.28852E-05 |
| NDUFB4    | 0.09355506   | 6.254105624 | 6.29623E-05 |
| MCM4      | 0.169055992  | 7.629456809 | 6.31093E-05 |
| HPSE      | -0.092841723 | 6.131004774 | 6.31455E-05 |
| SLC25A5   | 0.258089016  | 12.35221701 | 6.35578E-05 |
| DUSP3     | 0.280096034  | 12.0008992  | 6.43005E-05 |
| RTN4IP1   | 0.219550241  | 8.468581182 | 6.4456E-05  |
| FLJ39639  | 0.13102059   | 6.841784386 | 6.45591E-05 |
| KIFAP3    | 0.267214999  | 9.703833084 | 6.46411E-05 |
| UBD       | -0.218971346 | 6.123658148 | 6.4678E-05  |
| B4GALT4   | -0.109794216 | 6.891859062 | 6.49274E-05 |
| NKX2-5    | -0.274981098 | 9.949721294 | 6.50588E-05 |
| MAPK3     | -0.181464441 | 9.141120825 | 6.50813E-05 |
| LOC641978 | 0.106416043  | 6.396192384 | 6.51063E-05 |
| GMIP      | -0.139742935 | 6.125316644 | 6.56181E-05 |
| GCNT1     | -0.083466122 | 6.21198931  | 6.56527E-05 |
| GTPBP8    | 0.191302285  | 8.272085698 | 6.58144E-05 |
| CD4       | -0.12003613  | 6.327051393 | 6.58831E-05 |
| C3ORF38   | 0.160329902  | 7.150443199 | 6.60036E-05 |
| C21ORF122 | 0.177177043  | 6.869501541 | 6.63895E-05 |
| TCN2      | -0.198807359 | 7.044695361 | 6.6512E-05  |
| CENTG2    | -0.194283446 | 7.731250322 | 6.67085E-05 |
| LASS6     | 0.241738607  | 10.70953822 | 6.6733E-05  |
| FLJ23834  | -0.222712972 | 6.085045139 | 6.67453E-05 |
| REEP1     | 0.251546502  | 8.906842138 | 6.67991E-05 |
| CHEK2     | -0.072290864 | 6.197433919 | 6.69595E-05 |
| RAB6A     | 0.152872723  | 7.579492208 | 6.73086E-05 |
| ITGA10    | 0.319053495  | 7.208410556 | 6.73134E-05 |
| HIST3H2A  | 0.383313831  | 7.840981705 | 6.73424E-05 |
| ZNF266    | 0.098224942  | 6.928137976 | 6.7972E-05  |
| PRPF40B   | 0.104674849  | 6.361445528 | 6.81452E-05 |

## DEG.infomation

|            |              |             |             |
|------------|--------------|-------------|-------------|
| JTB        | -0.237093061 | 11.67862839 | 6.84752E-05 |
| MXRA7      | 0.188223828  | 8.672356542 | 6.8534E-05  |
| METTL9     | 0.084376686  | 6.724087747 | 6.9036E-05  |
| C3ORF19    | 0.163318098  | 8.34907158  | 6.90705E-05 |
| LOC644869  | 0.155683183  | 7.436609521 | 6.91124E-05 |
| TLR5       | -0.153356143 | 6.608253748 | 6.91651E-05 |
| RXRA       | -0.221781474 | 9.788437386 | 6.9245E-05  |
| RFTN2      | 0.227588543  | 7.504599629 | 6.93982E-05 |
| CTSH       | -0.220161399 | 8.744902497 | 6.95503E-05 |
| CENTD1     | 0.284482189  | 7.456028728 | 6.98786E-05 |
| KIAA0251   | -0.100417045 | 6.259296789 | 7.06626E-05 |
| SAV1       | 0.177789544  | 7.242355705 | 7.0699E-05  |
| RUFY2      | 0.073652035  | 6.436577781 | 7.09268E-05 |
| UBE3C      | -0.143290538 | 9.374408683 | 7.11063E-05 |
| GANAB      | -0.241570025 | 7.413580092 | 7.12832E-05 |
| LYPLA2     | -0.129997835 | 7.196013326 | 7.13917E-05 |
| SFRS2      | -0.176785345 | 10.83815556 | 7.15453E-05 |
| ADO        | 0.204834504  | 8.680798631 | 7.17269E-05 |
| FMO3       | 0.251040224  | 6.878660207 | 7.17964E-05 |
| RNASEN     | 0.139963372  | 7.6190997   | 7.18088E-05 |
| C8ORF55    | -0.256213368 | 8.994250515 | 7.18593E-05 |
| DBNDD2     | -0.24268447  | 12.42614176 | 7.19631E-05 |
| LOC85389   | -0.129148263 | 6.182404882 | 7.22077E-05 |
| MON1B      | -0.150363437 | 6.824011142 | 7.222E-05   |
| C14ORF149  | -0.268536199 | 7.316014615 | 7.28897E-05 |
| RGS18      | -0.140561416 | 6.41160877  | 7.31411E-05 |
| FLJ35429   | 0.175058685  | 6.632278664 | 7.34579E-05 |
| SEMA4A     | -0.118487632 | 6.339562124 | 7.38888E-05 |
| REV1       | 0.417804563  | 10.02490911 | 7.3972E-05  |
| NDUFV1     | -0.20985595  | 11.50188883 | 7.40102E-05 |
| STAM       | 0.286456908  | 8.948462209 | 7.40821E-05 |
| TOP3A      | -0.128237437 | 6.905600229 | 7.41118E-05 |
| C21ORF91   | 0.097972715  | 6.560899345 | 7.4151E-05  |
| TRIP13     | -0.146588952 | 6.121753102 | 7.44687E-05 |
| LOC26010   | 0.367522692  | 9.49205428  | 7.46715E-05 |
| NQO1       | -0.198775252 | 7.25403607  | 7.47519E-05 |
| TTLL4      | -0.109394213 | 6.270770551 | 7.52164E-05 |
| LYRM5      | 0.267863845  | 10.33644644 | 7.55119E-05 |
| SCAND1     | -0.16900059  | 8.446208285 | 7.55758E-05 |
| TCTN1      | 0.1635035    | 7.934247716 | 7.57094E-05 |
| LOC730083  | 0.110731811  | 6.152769531 | 7.58742E-05 |
| SHANK3     | -0.237825254 | 9.583582732 | 7.6675E-05  |
| ADCY1      | -0.166887863 | 6.588626681 | 7.68596E-05 |
| ATP5G1     | -0.212534484 | 11.52748066 | 7.69342E-05 |
| COL9A2     | 0.119973004  | 6.209127224 | 7.69773E-05 |
| WDR92      | 0.136402069  | 7.322477098 | 7.7143E-05  |
| JARID1B    | 0.123470128  | 7.968381002 | 7.75769E-05 |
| EXOC4      | 0.12124713   | 6.931603218 | 7.76981E-05 |
| DNAL1      | 0.12943231   | 6.951793991 | 7.78334E-05 |
| SNHG3-RCC1 | -0.178282244 | 6.130484937 | 7.78839E-05 |
| SMCHD1     | 0.112903782  | 6.46771514  | 7.80151E-05 |

## DEG.infomation

|           |              |             |             |
|-----------|--------------|-------------|-------------|
| LOC401284 | 0.11317715   | 6.122220879 | 7.80666E-05 |
| LDLRAP1   | 0.139637939  | 6.696223661 | 7.83446E-05 |
| SSBP2     | 0.28457945   | 9.42266917  | 7.84588E-05 |
| AKR1C3    | -0.329381497 | 9.514150262 | 7.88651E-05 |
| ZBTB16    | -0.471235147 | 8.472837445 | 7.88905E-05 |
| PPARGC1A  | 0.283184875  | 10.65904619 | 7.89148E-05 |
| SLC16A12  | -0.220065466 | 11.63858494 | 7.9119E-05  |
| LOC645018 | -0.301440885 | 7.573143509 | 7.91884E-05 |
| CCDC77    | 0.147995373  | 7.431092859 | 7.9263E-05  |
| MTX3      | 0.143773685  | 8.006524937 | 7.92746E-05 |
| ASMTL     | 0.1608943    | 8.319721724 | 7.95589E-05 |
| GALE      | -0.098922064 | 6.319138501 | 8.00667E-05 |
| VEZT      | 0.231077726  | 8.119858321 | 8.01044E-05 |
| SCN3B     | 0.113911224  | 6.335738148 | 8.02173E-05 |
| MLYCD     | 0.28217689   | 9.47761112  | 8.07733E-05 |
| MMD       | -0.266336118 | 7.957100846 | 8.07867E-05 |
| UGDH      | -0.331028435 | 8.058620256 | 8.09558E-05 |
| NUFIP2    | -0.167344575 | 7.895839744 | 8.10478E-05 |
| EDARADD   | 0.114924493  | 6.355353217 | 8.11277E-05 |
| ELP2      | 0.150121341  | 8.748639124 | 8.11568E-05 |
| C22ORF30  | 0.103126886  | 6.233989417 | 8.12644E-05 |
| PPAPDC3   | 0.386715079  | 10.58038593 | 8.14745E-05 |
| HADH2     | -0.156583246 | 7.896718148 | 8.15745E-05 |
| DNALI1    | 0.149271019  | 6.882706239 | 8.17975E-05 |
| ARIH1     | 0.143878496  | 7.96596758  | 8.184E-05   |
| BTG3      | -0.222131391 | 7.381310348 | 8.18527E-05 |
| KIAA0802  | 0.133914188  | 6.305363661 | 8.23352E-05 |
| STAMPB    | 0.143806184  | 8.646805686 | 8.24906E-05 |
| RIOK3     | 0.152575674  | 9.015894748 | 8.26235E-05 |
| AMY1A     | -0.277431441 | 6.674340393 | 8.26708E-05 |
| RPS15     | -0.212052945 | 11.309441   | 8.28236E-05 |
| PSD3      | 0.183513444  | 7.347656553 | 8.33566E-05 |
| TMEM63A   | -0.14694351  | 6.679477692 | 8.33856E-05 |
| EBF3      | 0.218044107  | 8.222299099 | 8.38222E-05 |
| TFCP2     | 0.146726652  | 8.210728496 | 8.40796E-05 |
| LOC440928 | 0.095831797  | 6.238091542 | 8.41692E-05 |
| DGCR6     | 0.253340426  | 10.60155964 | 8.41881E-05 |
| GMEB1     | -0.10371197  | 6.718675746 | 8.44115E-05 |
| MRPL55    | 0.141683292  | 9.040857843 | 8.46696E-05 |
| NDST2     | -0.13293245  | 7.688038713 | 8.47532E-05 |
| EPC1      | 0.148281324  | 6.570155231 | 8.47909E-05 |
| MOCS2     | 0.208751393  | 7.275085919 | 8.48382E-05 |
| MRPS35    | 0.262092476  | 9.026765415 | 8.49718E-05 |
| LOC653479 | 0.185738957  | 7.397638225 | 8.49887E-05 |
| NMNAT1    | 0.152478826  | 7.036812666 | 8.5272E-05  |
| STAT6     | -0.17333576  | 7.56182863  | 8.5557E-05  |
| SLC2A14   | -0.116644335 | 6.139564581 | 8.56901E-05 |
| SPRYD4    | 0.175161016  | 7.891065884 | 8.56955E-05 |
| PITX3     | -0.157649881 | 6.152982456 | 8.58361E-05 |
| PIK4CA    | -0.160701328 | 8.301050599 | 8.61855E-05 |
| VCAN      | -0.45328719  | 8.85731958  | 8.64003E-05 |

## DEG.infomation

|           |              |             |             |
|-----------|--------------|-------------|-------------|
| ZNF416    | 0.126604813  | 6.891990091 | 8.70115E-05 |
| JUN       | -0.287714693 | 10.29899996 | 8.72154E-05 |
| SRRD      | -0.176864654 | 7.044581413 | 8.72752E-05 |
| HIVEP1    | 0.1268596    | 7.011109114 | 8.73937E-05 |
| AUH       | 0.301080157  | 9.091024912 | 8.7594E-05  |
| AZI2      | 0.171149358  | 7.719345296 | 8.7731E-05  |
| ALKBH3    | -0.197357504 | 7.763493061 | 8.84111E-05 |
| RAB43     | 0.0782273    | 6.555981695 | 8.87672E-05 |
| SENP6     | 0.11998442   | 7.39718911  | 8.89642E-05 |
| LMBR1     | 0.174809758  | 8.118660715 | 8.89746E-05 |
| KIAA0776  | 0.13711392   | 6.563763726 | 8.94063E-05 |
| LY6E      | -0.451155055 | 8.163755176 | 8.9642E-05  |
| PARK7     | 0.161796062  | 11.85915049 | 8.97631E-05 |
| TMEM37    | -0.108500505 | 6.269104053 | 8.97827E-05 |
| LOC727935 | 0.113597794  | 6.535070446 | 8.99972E-05 |
| PCYOX1    | 0.294658559  | 9.397471304 | 9.04429E-05 |
| LOC644390 | 0.186394891  | 6.400403577 | 9.05578E-05 |
| DCK       | 0.096086079  | 6.770144668 | 9.13542E-05 |
| AKAP6     | 0.197128455  | 7.810797916 | 9.13885E-05 |
| PFTK1     | -0.157746425 | 6.712713172 | 9.14326E-05 |
| LRAP      | -0.274841551 | 12.08103084 | 9.14463E-05 |
| C1ORF218  | 0.254170503  | 8.387910836 | 9.15739E-05 |
| NUCB1     | -0.170547786 | 12.61936198 | 9.16891E-05 |
| LOC644863 | 0.199850071  | 12.40661942 | 9.22259E-05 |
| MYO1F     | -0.124430917 | 6.200820511 | 9.24492E-05 |
| NT5DC2    | -0.218902125 | 8.177761927 | 9.32011E-05 |
| ADNP      | 0.130370475  | 7.395724588 | 9.36418E-05 |
| PIK3CD    | -0.096500717 | 6.64653323  | 9.37606E-05 |
| PKN2      | 0.165413106  | 6.909041869 | 9.43143E-05 |
| OGT       | 0.192898357  | 9.136750988 | 9.44019E-05 |
| C8ORF4    | -0.335099314 | 7.984358225 | 9.44141E-05 |
| PCNT      | -0.271165244 | 9.215047269 | 9.70032E-05 |
| ATP5SL    | 0.17613879   | 10.58008468 | 9.70386E-05 |
| FOXC2     | 0.151901016  | 6.976946144 | 9.72168E-05 |
| HCG9      | 0.190989264  | 6.247084943 | 9.72778E-05 |
| C7ORF63   | 0.133314026  | 6.864026834 | 9.75535E-05 |
| TMEM216   | -0.159371187 | 7.624929118 | 9.7857E-05  |
| MCTP1     | -0.093438241 | 6.110764312 | 9.97034E-05 |
| MGC20983  | 0.129571189  | 6.529391563 | 0.000100418 |
| ECM1      | -0.192177885 | 7.210810974 | 0.000100749 |
| DST       | 0.140682532  | 6.536466911 | 0.00010083  |
| AATF      | -0.231656791 | 8.342084564 | 0.000101105 |
| SOCS4     | 0.10991448   | 7.192265182 | 0.000102033 |
| GOLGA8A   | -0.197341424 | 6.54236235  | 0.000102033 |
| CYB5R1    | 0.259089982  | 11.00883337 | 0.000102426 |
| SETD2     | 0.137444475  | 8.808897221 | 0.000102588 |
| ADH1A     | -0.617993322 | 8.785709049 | 0.000102663 |
| NOL5A     | -0.260155645 | 8.760345571 | 0.00010312  |
| RBM28     | 0.174044046  | 7.759890301 | 0.000103163 |
| AMMECR1   | -0.083618682 | 6.224400316 | 0.000103353 |
| LRP3      | 0.199024783  | 9.118613903 | 0.000103455 |

## DEG.infomation

|           |              |             |             |
|-----------|--------------|-------------|-------------|
| RASAL2    | 0.12662423   | 6.595214298 | 0.000103472 |
| ZNF658B   | 0.081766128  | 6.408647726 | 0.000103537 |
| KCTD14    | -0.092342765 | 6.092479138 | 0.000103664 |
| SPAG9     | -0.150614092 | 7.87835907  | 0.000103773 |
| ANKRD37   | -0.320317953 | 8.095848019 | 0.000103813 |
| COL14A1   | 0.189170345  | 6.833444371 | 0.000103825 |
| LOC202051 | 0.220822958  | 7.316520025 | 0.000104019 |
| MGC72104  | 0.257944754  | 8.303338248 | 0.000104203 |
| TRIM22    | -0.294376734 | 7.437965529 | 0.000104977 |
| PVRL3     | -0.142448481 | 7.034381339 | 0.000104994 |
| C20ORF39  | 0.341277669  | 8.624524829 | 0.000105031 |
| RPL8      | -0.159308447 | 12.33055474 | 0.000105322 |
| ZMIZ1     | 0.207110955  | 10.62759817 | 0.000105689 |
| STX5      | -0.14892465  | 8.365719519 | 0.000105818 |
| AS3MT     | 0.278178665  | 7.498369832 | 0.000106173 |
| RYBP      | -0.267902541 | 8.156652535 | 0.00010653  |
| NFU1      | 0.232917977  | 10.15247831 | 0.0001068   |
| RNF41     | -0.210742618 | 7.145221972 | 0.000107377 |
| ZNF136    | 0.0726305    | 6.308426468 | 0.000108023 |
| C21ORF124 | 0.108965208  | 6.411670858 | 0.000108086 |
| ADAMTS1   | -0.39629335  | 8.664461804 | 0.000108213 |
| UTP14C    | 0.174481652  | 8.61084275  | 0.000109436 |
| C2ORF49   | 0.176780855  | 8.030248029 | 0.000109706 |
| CSNK1G3   | 0.092382705  | 6.836320733 | 0.000109901 |
| CXORF38   | -0.151712843 | 7.234105468 | 0.000110097 |
| LOC651575 | 0.14735681   | 7.234093348 | 0.000110411 |
| GTF3C1    | 0.277453019  | 8.018326084 | 0.000110435 |
| PACS2     | -0.142986519 | 7.431840035 | 0.000110505 |
| HSPA1B    | -0.373148145 | 10.80002308 | 0.000110649 |
| HOXC11    | 0.18944072   | 6.685198135 | 0.000111047 |
| DMPK      | -0.253544049 | 7.972317398 | 0.000111342 |
| MOCOS     | -0.121116928 | 6.274307368 | 0.000111503 |
| NDUFB5    | 0.286925451  | 12.69246442 | 0.000111515 |
| ZNF691    | 0.114163291  | 6.550042779 | 0.000111619 |
| MED20     | -0.210040835 | 9.799405047 | 0.000111649 |
| MYOZ1     | 0.320841748  | 6.707191938 | 0.000111726 |
| ZNF14     | -0.327793544 | 10.23590523 | 0.000112028 |
| HMGA1     | -0.160600017 | 6.753728484 | 0.000112325 |
| LOC644284 | 0.134048016  | 6.491873469 | 0.000112326 |
| E4F1      | -0.18839426  | 9.115816802 | 0.000112776 |
| MAP3K1    | 0.239896892  | 7.991295646 | 0.000112813 |
| AK2       | -0.161920364 | 10.09663461 | 0.00011286  |
| IMPDH2    | -0.284474839 | 9.352256708 | 0.00011327  |
| MARVELD2  | -0.070904618 | 5.99648999  | 0.000113564 |
| PDHX      | 0.246691161  | 10.38608158 | 0.000113604 |
| VPS11     | 0.138436247  | 6.977391291 | 0.000113714 |
| FAM23B    | -0.130149783 | 6.262129744 | 0.000114075 |
| C14ORF102 | 0.13008787   | 7.721204824 | 0.000114078 |
| TGDS      | 0.120855219  | 7.387974532 | 0.00011431  |
| FLNC      | -0.342914009 | 13.31933655 | 0.000114787 |
| LOC642732 | 0.14122622   | 6.501238786 | 0.000115141 |

## DEG.infomation

|           |              |             |             |
|-----------|--------------|-------------|-------------|
| IFNGR2    | -0.179749242 | 10.60785719 | 0.000115145 |
| CHRM2     | 0.111096868  | 6.399469025 | 0.000115373 |
| CBFB      | -0.214687055 | 7.332194673 | 0.000115981 |
| ZNF438    | 0.155905222  | 7.506578843 | 0.000116111 |
| HIST1H1A  | 0.130765728  | 6.658084652 | 0.000116282 |
| MS4A6E    | -0.105331041 | 5.98571932  | 0.000116637 |
| CYHR1     | 0.179039051  | 6.929925909 | 0.000116861 |
| GTF3C2    | -0.100258042 | 7.945991412 | 0.000117109 |
| NOLC1     | -0.173934328 | 6.895468    | 0.000118417 |
| LOC653066 | -0.108955152 | 6.406846867 | 0.000119081 |
| BEX4      | 0.269857832  | 9.243662623 | 0.000119221 |
| DCP1A     | -0.156235971 | 7.346770742 | 0.000119441 |
| UBL4A     | -0.199397418 | 8.783355253 | 0.000119497 |
| C10ORF6   | 0.205987018  | 9.014874547 | 0.000119739 |
| MOG       | -0.144458995 | 6.261241107 | 0.000119844 |
| GRAMD3    | -0.185383848 | 8.013807509 | 0.000119866 |
| MICAL2    | 0.206675005  | 7.473714779 | 0.0001201   |
| GIMAP8    | -0.295224708 | 8.817728183 | 0.000120309 |
| C9ORF127  | 0.150058049  | 7.306310811 | 0.000120709 |
| THRAP5    | -0.118672574 | 6.372557488 | 0.000120964 |
| GTDC1     | 0.095595517  | 6.77335176  | 0.000121142 |
| PPP1CC    | -0.223195795 | 11.42278035 | 0.000121175 |
| LAP3      | -0.268385037 | 9.147010177 | 0.000121448 |
| C3ORF58   | 0.146407582  | 7.05548744  | 0.000122069 |
| PRKRIP1   | 0.130139587  | 7.739184637 | 0.000122187 |
| NRIP3     | 0.182351207  | 6.733913826 | 0.000122321 |
| PECAM1    | -0.267733102 | 8.875626209 | 0.000122462 |
| ZNF543    | 0.112710526  | 6.590671439 | 0.000122489 |
| PPA1      | -0.241920221 | 11.43012141 | 0.000122714 |
| LOC729148 | -0.22827783  | 8.88960901  | 0.00012286  |
| ZC3H3     | -0.169824505 | 8.36694687  | 0.000122983 |
| ADORA2B   | 0.132421045  | 6.584997322 | 0.000123202 |
| FIGNL1    | 0.083178657  | 6.865957951 | 0.000123328 |
| SHKBP1    | -0.132762483 | 6.69082478  | 0.000123971 |
| CXCL10    | -0.414303577 | 6.675227316 | 0.000124203 |
| FLJ22222  | 0.126395521  | 7.272855107 | 0.00012434  |
| LOC645100 | 0.170497021  | 7.083206569 | 0.000124863 |
| EFHA2     | 0.136046513  | 6.384782138 | 0.000124895 |
| HLA-DRB3  | -0.355664966 | 7.665932261 | 0.00012518  |
| GSDMB     | 0.148590222  | 6.923338065 | 0.000125215 |
| C4ORF30   | 0.135021942  | 7.903727108 | 0.000125242 |
| CPLX3     | -0.109661945 | 6.069127929 | 0.000125278 |
| OXSM      | 0.155237032  | 7.130651739 | 0.000125363 |
| LOC440704 | -0.266866621 | 9.701061097 | 0.00012551  |
| SFRS4     | -0.179798308 | 10.35068055 | 0.000125633 |
| ZNF2      | 0.091198745  | 6.441948302 | 0.000126017 |
| RPL3      | -0.226151423 | 12.56999692 | 0.000126226 |
| FZD7      | 0.188572072  | 7.991075178 | 0.000126971 |
| NDUFB7    | 0.183234051  | 12.40791408 | 0.000126973 |
| DNER      | -0.162150902 | 6.120690421 | 0.000127147 |
| LOC653394 | 0.09686179   | 6.469710868 | 0.00012794  |

## DEG.infomation

|                |              |             |             |
|----------------|--------------|-------------|-------------|
| DKFZP686I15217 | 0.090464055  | 6.533269629 | 0.000128103 |
| SERPING1       | -0.281031329 | 7.868006148 | 0.000128358 |
| LOC651149      | -0.375240483 | 8.561579866 | 0.000128409 |
| RAB13          | -0.245549494 | 6.762786756 | 0.000128514 |
| STRBP          | -0.184050975 | 7.052335662 | 0.00012898  |
| SHC1           | -0.232289684 | 8.476874271 | 0.000129194 |
| LOC653342      | -0.126837144 | 6.0824073   | 0.000129571 |
| COPZ1          | -0.165072036 | 8.713876551 | 0.000130394 |
| GTF2E1         | 0.109708636  | 7.180582605 | 0.00013047  |
| GSTK1          | 0.196231728  | 11.2718068  | 0.000130761 |
| ALDOA          | -0.207594509 | 11.97465954 | 0.000130968 |
| LOC652826      | -0.197926958 | 7.494510465 | 0.000132009 |
| CAPN5          | -0.170013005 | 6.990146458 | 0.000132474 |
| LOC653354      | 0.136414527  | 6.979613536 | 0.000132569 |
| BIN3           | -0.14272844  | 6.546675876 | 0.000133309 |
| PUM1           | 0.136581879  | 10.3240619  | 0.00013385  |
| ARPC5          | -0.293763795 | 9.886903482 | 0.000134359 |
| TOR1B          | -0.151800382 | 7.23803638  | 0.000134486 |
| PPM1A          | 0.173907707  | 6.981698465 | 0.000134715 |
| LOC196993      | 0.112507043  | 6.348114951 | 0.000134906 |
| VPS35          | 0.251718945  | 10.47410391 | 0.000135162 |
| RGR            | -0.084678769 | 6.361680307 | 0.000135552 |
| NAGA           | -0.121604764 | 6.323566223 | 0.000136816 |
| MAGT1          | -0.295764234 | 9.918128826 | 0.000137357 |
| ZNF688         | 0.118327566  | 6.881993362 | 0.000137572 |
| PM2PA1         | -0.273150149 | 7.893996178 | 0.000137639 |
| PLCZ1          | 0.124415885  | 6.218455723 | 0.000137809 |
| PCDH9          | 0.178329296  | 6.756591092 | 0.000138395 |
| C14ORF43       | 0.133990509  | 7.179833023 | 0.00013856  |
| OSBP2          | 0.246343872  | 7.06891718  | 0.000138695 |
| EPM2A          | 0.173427928  | 7.032147055 | 0.000139147 |
| AURKAIP1       | -0.16979509  | 12.46675745 | 0.000139349 |
| CACNA2D2       | 0.094106021  | 6.474621394 | 0.000140078 |
| ZNF687         | 0.102667002  | 6.20237173  | 0.000140219 |
| LOC653158      | -0.17780886  | 6.843195048 | 0.000140278 |
| CCNG1          | -0.269187017 | 8.371246136 | 0.000140838 |
| YTHDF3         | 0.149245574  | 8.104454266 | 0.000140843 |
| C12ORF34       | -0.142568597 | 6.382198073 | 0.000141541 |
| FAM83D         | -0.170189409 | 6.11701979  | 0.000141999 |
| PMS2CL         | 0.049680531  | 6.22872533  | 0.000142195 |
| NUDT2          | 0.271047386  | 8.336962948 | 0.000142629 |
| CDK5RAP2       | 0.201656936  | 8.464530307 | 0.000143366 |
| RILPL2         | -0.151449485 | 7.009512133 | 0.000143945 |
| LOC124512      | 0.169339854  | 9.344397757 | 0.000144305 |
| SSFA2          | 0.182878382  | 7.244191089 | 0.00014438  |
| FADS3          | -0.171444479 | 6.643033327 | 0.00014506  |
| RHBDD1         | -0.109662164 | 7.656152834 | 0.000145234 |
| LSM4           | 0.2258153    | 9.938953153 | 0.000146032 |
| CUL4B          | 0.117031469  | 6.867645144 | 0.00014605  |
| CBS            | -0.346952141 | 7.577785515 | 0.00014635  |
| SUSD2          | -0.331283703 | 7.557538945 | 0.000146371 |



## DEG.infomation

|           |              |             |             |
|-----------|--------------|-------------|-------------|
| LEO1      | 0.128363141  | 6.84717223  | 0.000146476 |
| RFXANK    | -0.122458309 | 7.39649858  | 0.000146525 |
| POLR2I    | 0.1743728    | 10.7533389  | 0.000146713 |
| ZNF418    | 0.141437703  | 6.914482028 | 0.000147126 |
| FAM114A1  | -0.125387435 | 6.443771934 | 0.000147135 |
| MED25     | -0.222273828 | 7.89903019  | 0.000147216 |
| CLN8      | -0.136041885 | 6.713139414 | 0.000147382 |
| LOC401357 | -0.161744545 | 7.006203152 | 0.000147391 |
| GRB14     | -0.205299109 | 7.080192284 | 0.000147804 |
| HEATR3    | -0.10253953  | 6.737918345 | 0.00014897  |
| SUPT5H    | 0.22079292   | 9.503485658 | 0.000149042 |
| PPIL4     | 0.106084801  | 6.27867893  | 0.000149161 |
| SEL1L2    | -0.491400526 | 6.953252308 | 0.000149841 |
| HK1       | -0.177939637 | 10.42481935 | 0.00015014  |
| C12ORF52  | 0.138385174  | 8.019208535 | 0.000150663 |
| NELL1     | 0.133080505  | 6.566081194 | 0.000152083 |
| FAM10A7   | 0.217335104  | 7.140285285 | 0.000152123 |
| ATP6V1H   | 0.161326934  | 8.245006611 | 0.00015217  |
| PFDN6     | -0.250868577 | 7.284707428 | 0.000152886 |
| NEK7      | 0.298743998  | 6.991287939 | 0.000153205 |
| TBCCD1    | -0.090663199 | 6.524408595 | 0.000153278 |
| ATP6V1E1  | 0.158072227  | 11.67936973 | 0.000153524 |
| COPS8     | 0.14756496   | 9.019018424 | 0.000154197 |
| IGF2R     | -0.194607188 | 10.68105722 | 0.000154264 |
| COL4A6    | 0.136929616  | 6.57113086  | 0.000154658 |
| SSH1      | -0.153141188 | 6.990919903 | 0.000155182 |
| CUL4A     | 0.183376834  | 9.886550176 | 0.000155614 |
| NRP1      | 0.176777732  | 9.041473114 | 0.000156523 |
| DNM1L     | 0.152482588  | 8.703102639 | 0.000156793 |
| CCDC132   | 0.129431574  | 6.600713067 | 0.000157385 |
| PEG3      | 0.174811552  | 7.558197935 | 0.000157433 |
| KRR1      | 0.137372704  | 6.789639736 | 0.000158231 |
| PPP2R2B   | 0.164808403  | 7.455160443 | 0.000158402 |
| PARP16    | 0.135300416  | 6.576283983 | 0.000159111 |
| SELT      | 0.139048804  | 8.210235276 | 0.000159155 |
| NKIRAS1   | 0.174630461  | 9.213437558 | 0.000159507 |
| TSEN2     | -0.156538504 | 7.720610173 | 0.000159731 |
| GRN       | -0.181104168 | 9.150381207 | 0.000159739 |
| RAB40C    | -0.208007698 | 9.520648978 | 0.000160612 |
| GPC1      | 0.241699824  | 8.671842039 | 0.00016093  |
| PHF12     | 0.071272496  | 6.506722246 | 0.000161058 |
| THRSP     | -0.312762553 | 6.119876815 | 0.000161277 |
| NETO2     | -0.247215545 | 6.914553747 | 0.000161342 |
| CPNE1     | -0.133825122 | 7.223895138 | 0.000161579 |
| HSPB6     | 0.44043809   | 11.83405565 | 0.000161815 |
| PPP1R14C  | 0.263427757  | 10.23067157 | 0.000161845 |
| C20ORF196 | 0.12896711   | 6.77398132  | 0.000162061 |
| CENTG3    | 0.159426607  | 7.117960831 | 0.000162286 |
| SLC41A1   | 0.27347771   | 10.45567821 | 0.000163177 |
| STGC3     | 0.141173829  | 6.418320748 | 0.000163382 |
| CCDC90B   | 0.153799982  | 9.342384308 | 0.000163545 |

## DEG.infomation

|           |              |             |             |
|-----------|--------------|-------------|-------------|
| HSGT1     | 0.123020194  | 6.64396559  | 0.000164095 |
| STAU1     | 0.165843065  | 10.21739795 | 0.000164434 |
| C21ORF119 | 0.177304029  | 7.33419214  | 0.000164895 |
| FIP1L1    | 0.158599675  | 7.32685246  | 0.000164953 |
| C9ORF169  | 0.118287134  | 6.173743871 | 0.000164968 |
| ALS2CR16  | 0.110878135  | 6.256009416 | 0.000165327 |
| CD274     | -0.126746594 | 6.18454218  | 0.000165333 |
| STAT5A    | -0.194136465 | 7.641104274 | 0.0001655   |
| SH3BP2    | -0.109765795 | 6.22465608  | 0.000165591 |
| KCTD20    | -0.194311648 | 8.53680804  | 0.00016586  |
| FOXRED2   | 0.124908541  | 6.677390833 | 0.000165875 |
| RBP7      | 0.311028559  | 8.702943679 | 0.000165881 |
| TM7SF3    | 0.187825489  | 7.3054448   | 0.000165901 |
| CPAMD8    | -0.140857716 | 6.302285508 | 0.000166244 |
| SMARCD1   | -0.120479778 | 7.758833462 | 0.000166505 |
| MCFD2     | -0.17281098  | 7.51675732  | 0.000166532 |
| CLIP3     | 0.309710816  | 8.248855352 | 0.000166555 |
| HHEX      | 0.186015328  | 6.82052362  | 0.000166629 |
| CYB5A     | 0.269359712  | 9.703865353 | 0.000167267 |
| TJP2      | 0.196291083  | 7.21024241  | 0.000167822 |
| C1ORF198  | 0.283940077  | 8.501982858 | 0.000167867 |
| APPL1     | 0.228407514  | 8.151970267 | 0.000168407 |
| MED8      | -0.116779413 | 7.256214533 | 0.000169313 |
| DEXI      | -0.226713498 | 10.91850641 | 0.000169387 |
| MAPK6     | -0.236023007 | 8.248979599 | 0.00016957  |
| MKS1      | 0.119322216  | 6.523693519 | 0.000170429 |
| CCDC7     | 0.058736225  | 6.118813348 | 0.000170556 |
| NCAM1     | 0.144135411  | 7.199351988 | 0.000171378 |
| LOC728417 | 0.090302502  | 6.48964982  | 0.000172579 |
| IDI2      | 0.114735101  | 6.244684789 | 0.000173545 |
| PSMD10    | 0.15356369   | 8.001227778 | 0.000173849 |
| TRIM2     | 0.299713549  | 8.055042837 | 0.000174101 |
| SLC44A2   | 0.171200958  | 10.0226822  | 0.000174982 |
| MECR      | 0.102521707  | 6.533810307 | 0.000175361 |
| GDF15     | 0.128902779  | 6.357894517 | 0.000175493 |
| C20ORF30  | 0.136805921  | 10.5045406  | 0.0001757   |
| KRAS      | -0.110016544 | 7.043808293 | 0.000176681 |
| YPEL5     | 0.210753934  | 9.820373823 | 0.000176837 |
| KIAA0020  | -0.208912342 | 8.505772701 | 0.000176956 |
| DLK2      | 0.141901342  | 6.438228858 | 0.000177175 |
| PLEKHH1   | -0.117321996 | 6.443836489 | 0.000177712 |
| C14ORF85  | -0.268620698 | 11.47968661 | 0.000178301 |
| AEBP2     | 0.11349287   | 7.448438251 | 0.000179117 |
| ABCC3     | -0.130058817 | 6.221548943 | 0.000179259 |
| EIF4EBP1  | -0.152237927 | 6.326368785 | 0.000179533 |
| LBR       | -0.074752976 | 6.323223336 | 0.000179701 |
| DSG4      | 0.104845387  | 6.359698846 | 0.000179773 |
| HDGF2     | 0.115217546  | 7.866492556 | 0.000179941 |
| FN1       | -0.100369688 | 6.137592625 | 0.000180612 |
| AKR1D1    | -0.19678631  | 12.11866731 | 0.000180821 |
| ZNF673    | 0.122058866  | 6.40420992  | 0.000181153 |

## DEG.infomation

|           |              |             |             |
|-----------|--------------|-------------|-------------|
| CSF2RA    | -0.21715802  | 8.960437489 | 0.000181464 |
| NPY6R     | 0.232767588  | 9.459037576 | 0.000181619 |
| LOC90826  | 0.138746299  | 7.189597048 | 0.000183045 |
| CCBL2     | -0.091735243 | 6.720201154 | 0.000183061 |
| SCARB1    | 0.159009217  | 7.011659259 | 0.000184085 |
| LOC648581 | -0.131091347 | 6.907540224 | 0.000184487 |
| BECN1     | 0.14378406   | 8.528256122 | 0.000184962 |
| LOC644322 | -0.391324181 | 8.651775795 | 0.000185055 |
| ARHGAP28  | 0.067811952  | 6.109392795 | 0.000185769 |
| MSTN      | 0.115511     | 6.201081302 | 0.000185934 |
| MYL9      | 0.249016125  | 10.2354434  | 0.000186967 |
| C1ORF186  | -0.113252076 | 6.092516718 | 0.000187011 |
| CPSF1     | -0.165935209 | 8.154542056 | 0.000187027 |
| LOC652541 | 0.127381911  | 6.799746987 | 0.000187214 |
| C5ORF29   | -0.15293865  | 6.325838293 | 0.000187616 |
| KCNK1     | -0.443341157 | 7.66320109  | 0.000187627 |
| PQLC1     | -0.136463408 | 10.21947392 | 0.000187978 |
| ATAD1     | 0.179176927  | 9.135469743 | 0.000188016 |
| TOMM20    | 0.213077832  | 9.736854883 | 0.000188588 |
| TIGD2     | 0.101001516  | 6.656948877 | 0.000191819 |
| GCS1      | -0.148488093 | 6.790134749 | 0.000192104 |
| MGC70857  | -0.155096072 | 7.798947412 | 0.000193628 |
| AQP7      | 0.274168949  | 7.724859293 | 0.000193763 |
| HLA-DMB   | -0.324347317 | 8.895074213 | 0.000193903 |
| RICTOR    | 0.155199328  | 6.503311184 | 0.000194139 |
| L2HGDH    | 0.189035835  | 7.74962376  | 0.000194447 |
| GLO1      | 0.200091566  | 11.10744581 | 0.000195978 |
| PPOX      | 0.143495988  | 7.769638702 | 0.000196968 |
| CENPN     | -0.263152592 | 7.102226606 | 0.000197304 |
| SUCLA2    | 0.277451463  | 10.10153693 | 0.000197431 |
| FBXO40    | 0.182575067  | 6.292168216 | 0.000198338 |
| NDUFS1    | 0.249807098  | 7.815901257 | 0.000198483 |
| C13ORF34  | -0.126540228 | 6.175584518 | 0.000199579 |
| CCL8      | -0.392844419 | 6.963754791 | 0.000200014 |
| MAP1A     | 0.419393807  | 8.553758813 | 0.000200707 |
| CCT7      | -0.137038895 | 10.52917787 | 0.000201516 |
| PNKD      | 0.124004285  | 7.44778399  | 0.000201927 |
| BTBD1     | 0.286057734  | 8.665908355 | 0.00020201  |
| DNAJC3    | -0.149213124 | 6.292263331 | 0.000203426 |
| C6ORF35   | 0.092266218  | 6.268883958 | 0.000203445 |
| LAS1L     | -0.155062271 | 6.810027627 | 0.000203696 |
| EEF1E1    | -0.212385736 | 7.720975118 | 0.00020389  |
| CDO1      | 0.235810554  | 7.382970659 | 0.000204208 |
| ZNF341    | -0.126868851 | 6.681570198 | 0.000204615 |
| SLC36A2   | -0.124926759 | 6.069916635 | 0.000206022 |
| RHOJ      | -0.165580519 | 7.571994351 | 0.000206226 |
| NLRC4     | -0.107415926 | 6.177295022 | 0.000207255 |
| PRPF31    | 0.19312114   | 9.178884915 | 0.000207673 |
| AASDH     | 0.145624012  | 7.311213016 | 0.000207792 |
| PCDHGA12  | -0.159154363 | 6.442593513 | 0.000208294 |
| USP31     | -0.134615048 | 6.05233901  | 0.000208756 |

## DEG.infomation

|           |              |             |             |
|-----------|--------------|-------------|-------------|
| WDR40A    | -0.137910693 | 8.101554723 | 0.000209572 |
| ZNF546    | 0.107810159  | 5.998990178 | 0.00020968  |
| HLA-DQB1  | -0.284652643 | 6.713819686 | 0.000210266 |
| LCN10     | -0.11920945  | 6.0255868   | 0.000210899 |
| CHST3     | -0.234082004 | 8.13579908  | 0.000211245 |
| SLK       | 0.207788722  | 8.822857137 | 0.000211363 |
| NUP133    | 0.18127603   | 8.469713905 | 0.000211744 |
| WDR8      | 0.126589883  | 8.134812105 | 0.000212234 |
| MPZL2     | 0.185935577  | 7.34242992  | 0.000212285 |
| ZNF140    | 0.176801897  | 6.699499279 | 0.000212549 |
| GYG2      | -0.069997517 | 6.02595808  | 0.000214572 |
| CTBS      | 0.126906935  | 7.294391048 | 0.000214768 |
| SH3KBP1   | -0.402685724 | 9.553223335 | 0.000214789 |
| HSPA14    | -0.129378719 | 7.989031572 | 0.000215096 |
| ERCC2     | 0.148572903  | 6.893627012 | 0.000215129 |
| TP53I11   | -0.109156436 | 6.414639868 | 0.000215866 |
| CTDSPL    | 0.202221386  | 9.890123237 | 0.000215965 |
| TLR6      | -0.075142129 | 6.20524766  | 0.000216588 |
| TBL1XR1   | 0.226338087  | 7.35539186  | 0.00021662  |
| MRPL54    | 0.211615394  | 9.924183361 | 0.000217525 |
| LOC390354 | -0.283926835 | 12.01165825 | 0.000217578 |
| EIF1B     | 0.348769782  | 11.57295348 | 0.000217855 |
| LOC134997 | -0.267971329 | 10.81287182 | 0.00021825  |
| IQGAP2    | 0.191059631  | 6.961259705 | 0.000219548 |
| C5ORF35   | 0.271209025  | 8.069133657 | 0.000220122 |
| DIRAS1    | -0.327071954 | 7.232339495 | 0.000220535 |
| CREB1     | -0.231402601 | 11.39676671 | 0.000220967 |
| HLA-H     | -0.288349587 | 9.853336556 | 0.000221581 |
| PCBP2     | 0.136360385  | 11.71845742 | 0.000221625 |
| LOC651316 | 0.153782173  | 6.527782663 | 0.000222003 |
| SLC4A1AP  | 0.154337768  | 7.277775277 | 0.000222294 |
| DHRS3     | 0.210478224  | 9.291983192 | 0.00022343  |
| GCC2      | 0.068705587  | 6.167683197 | 0.000224089 |
| NOTCH4    | -0.223434463 | 7.769449166 | 0.000224131 |
| C12ORF65  | 0.207570897  | 7.445712172 | 0.00022471  |
| FGFRL1    | -0.168141655 | 7.695050098 | 0.000224765 |
| NR3C2     | 0.200608111  | 8.036776764 | 0.000227507 |
| ZNF160    | 0.115254242  | 7.430670308 | 0.000228665 |
| C12ORF4   | 0.151482917  | 7.453520055 | 0.000228817 |
| ISOC1     | 0.30188083   | 9.880737249 | 0.000228837 |
| LOC727848 | -0.088813214 | 6.25370018  | 0.000229201 |
| LOC647389 | -0.24372079  | 8.316837776 | 0.000229876 |
| GOLGA1    | 0.14862051   | 7.485095093 | 0.000230009 |
| HSCB      | -0.128052565 | 8.023342108 | 0.000230459 |
| P2RY1     | 0.094714797  | 6.251609503 | 0.000230661 |
| DPY30     | 0.15434244   | 8.879986927 | 0.000230983 |
| SYDE2     | 0.104721292  | 6.575569273 | 0.000231455 |
| ZBTB33    | 0.145635564  | 8.698238534 | 0.000231478 |
| PHB       | -0.115915742 | 9.691590515 | 0.000231796 |
| ESR1      | 0.127395437  | 6.299203757 | 0.000232061 |
| YY1AP1    | -0.105815558 | 8.220928621 | 0.000232144 |

## DEG.infomation

|           |              |             |             |
|-----------|--------------|-------------|-------------|
| C3ORF37   | -0.127029735 | 8.064219096 | 0.000232171 |
| C10ORF59  | 0.160221179  | 7.414828094 | 0.000232656 |
| MAPRE1    | -0.179867115 | 10.39269797 | 0.00023277  |
| POLDIP2   | 0.125108479  | 8.260828822 | 0.000232868 |
| TMEM44    | -0.145234059 | 6.720626477 | 0.000232995 |
| ISCA1     | 0.227582544  | 8.736834496 | 0.000233165 |
| FLJ42875  | 0.10969231   | 6.484570738 | 0.000234596 |
| GMCL1     | 0.131356795  | 6.807214964 | 0.000235747 |
| GAB2      | 0.1411136339 | 7.225024636 | 0.00023707  |
| PPP2CA    | 0.151993527  | 11.49227561 | 0.000238261 |
| ICA1      | -0.16637616  | 8.929891896 | 0.000238662 |
| TUSC1     | -0.149850418 | 7.165282034 | 0.000239106 |
| JPH3      | 0.104047848  | 6.4816094   | 0.000239513 |
| C15ORF52  | 0.275758389  | 11.21188434 | 0.000240469 |
| ROCK1     | 0.164345072  | 6.528723568 | 0.000240484 |
| PSCDBP    | -0.116715791 | 6.110117947 | 0.000241385 |
| MGC13057  | -0.160893332 | 7.358650564 | 0.000241765 |
| TUBA4A    | -0.397931274 | 10.51807443 | 0.00024227  |
| HSPG2     | 0.143121051  | 6.667651526 | 0.00024246  |
| VEGFA     | 0.22110042   | 7.835257111 | 0.000242623 |
| COL6A1    | -0.245790086 | 9.42535504  | 0.000243549 |
| ACO1      | 0.144536374  | 11.08996311 | 0.000243625 |
| BCL7B     | -0.125347787 | 8.509380049 | 0.000243634 |
| ATG4C     | 0.108478263  | 6.708713864 | 0.000243809 |
| KIF15     | 0.102032226  | 6.231447993 | 0.00024401  |
| LOC653157 | 0.173542513  | 6.414342543 | 0.000244024 |
| OSGIN1    | -0.101306617 | 6.245286968 | 0.000244244 |
| MAFK      | 0.118394022  | 6.232724898 | 0.000246457 |
| FZD8      | -0.14016533  | 6.570936953 | 0.000246479 |
| PLOD2     | -0.246631856 | 7.964232251 | 0.000246801 |
| D4S234E   | -0.387536964 | 7.344409561 | 0.000246863 |
| STIP1     | -0.263594981 | 9.330633033 | 0.000247712 |
| STX16     | 0.177166556  | 9.258644886 | 0.000247968 |
| C19ORF61  | -0.136670044 | 6.608912979 | 0.000248249 |
| RAPGEFL1  | -0.124881984 | 6.667211479 | 0.000248823 |
| SPOCK2    | -0.345176505 | 8.071955034 | 0.000249521 |
| C18ORF34  | 0.188665473  | 6.312602554 | 0.000249542 |
| UPF3A     | 0.1435812    | 7.844110827 | 0.000250748 |
| WISP1     | -0.099159674 | 6.130707895 | 0.00025176  |
| C13ORF1   | 0.154590943  | 7.833540709 | 0.000252754 |
| NEURL2    | 0.188124072  | 7.501848403 | 0.00025304  |
| PIBF1     | 0.111196322  | 6.791270342 | 0.000253678 |
| SEPN1     | -0.217154583 | 8.018903902 | 0.000253801 |
| GALNTL2   | -0.254178392 | 6.470288389 | 0.000254821 |
| EMCN      | -0.238287577 | 7.682641385 | 0.000255149 |
| PML       | -0.044297341 | 6.211809298 | 0.000255734 |
| LOC651398 | 0.086245414  | 6.146234372 | 0.000256149 |
| RPS3      | -0.22201017  | 12.18019545 | 0.000256389 |
| VPS39     | 0.201414558  | 7.405090662 | 0.00025681  |
| KIAA1219  | -0.111678131 | 7.124355381 | 0.000257203 |
| USP49     | -0.360113541 | 10.20446722 | 0.000257538 |

## DEG.infomation

|           |              |             |             |
|-----------|--------------|-------------|-------------|
| ABHD4     | 0.119465598  | 6.73057528  | 0.000257549 |
| DNASE2    | 0.202045504  | 9.387863882 | 0.000257942 |
| LOC650683 | 0.096989214  | 6.271413021 | 0.000258112 |
| PARP3     | 0.150030671  | 8.119751833 | 0.000259974 |
| NDUFS2    | 0.263511368  | 8.305911356 | 0.00026006  |
| C7ORF10   | 0.171856762  | 7.077656942 | 0.000260423 |
| LOC728744 | -0.108448104 | 6.098719964 | 0.000260448 |
| INPP5D    | -0.135642516 | 6.531409367 | 0.000262804 |
| ZDHHC7    | -0.121993354 | 9.614519906 | 0.00026353  |
| BCO2      | 0.212196834  | 6.630349426 | 0.000263977 |
| KCNK6     | 0.185821336  | 7.099623623 | 0.000264052 |
| ZNF334    | 0.07375652   | 6.16935788  | 0.000265139 |
| XIRP2     | 0.588422606  | 11.0412158  | 0.000265418 |
| SYPL2     | -0.220817045 | 7.309603688 | 0.000266062 |
| ZMYND17   | 0.196513549  | 6.511344709 | 0.000266084 |
| LOC643722 | -0.085119831 | 6.041009972 | 0.000267148 |
| LOC727762 | 0.157299042  | 6.881208918 | 0.000267439 |
| NUP93     | -0.161108583 | 8.222863845 | 0.000267564 |
| C16ORF57  | -0.181281492 | 8.017709745 | 0.000267588 |
| LASS2     | -0.196999159 | 7.859701277 | 0.000267716 |
| HNRNPUL2  | -0.191041294 | 8.491577489 | 0.000268658 |
| MPST      | -0.121908802 | 7.100634911 | 0.000269976 |
| ANKDD1A   | -0.130765865 | 7.376042908 | 0.000270294 |
| SNRPN     | 0.188492336  | 10.97221158 | 0.000272589 |
| IRF5      | -0.092688863 | 6.135925293 | 0.000272889 |
| TTC35     | 0.202030172  | 6.9057749   | 0.00027359  |
| ZNF383    | 0.117376087  | 6.548394548 | 0.000273849 |
| ZNF275    | -0.107330692 | 7.2970995   | 0.000273966 |
| LTF       | -0.108587713 | 6.098604935 | 0.000274871 |
| LOC730316 | -0.141958427 | 10.11782448 | 0.000274995 |
| ARMCX5    | 0.11851823   | 6.740878718 | 0.000276306 |
| EHHADH    | 0.255194567  | 7.545747158 | 0.000276505 |
| REV3L     | 0.135196827  | 6.722681634 | 0.000276565 |
| DLG4      | 0.204591626  | 7.208008044 | 0.000276919 |
| LOC646144 | 0.059303823  | 6.212110442 | 0.000277174 |
| OBFC2B    | 0.186508151  | 7.522617216 | 0.000278    |
| CCR4      | 0.09089438   | 5.877431035 | 0.000279613 |
| ZNF606    | 0.114001472  | 6.69032838  | 0.000280091 |
| KCNS1     | 0.118507261  | 6.199456398 | 0.000281692 |
| ZFP112    | 0.18089395   | 6.75467867  | 0.000282268 |
| PSTK      | 0.097081486  | 6.755062767 | 0.000283013 |
| TMEM93    | -0.128704851 | 10.03613492 | 0.000283407 |
| ARSG      | 0.109543932  | 6.614678963 | 0.000283411 |
| FLJ35220  | 0.104212491  | 6.431803121 | 0.000283824 |
| SRPK2     | -0.221875882 | 6.875696481 | 0.000283909 |
| VSIG8     | 0.103937703  | 6.311744653 | 0.000284128 |
| NUDT1     | 0.126207444  | 7.653106144 | 0.000284154 |
| MED11     | 0.124581709  | 6.571925356 | 0.000284937 |
| LOC645743 | 0.111014946  | 6.426634338 | 0.000287069 |
| YEATS2    | 0.139191622  | 7.763232265 | 0.000287894 |
| LRCH1     | 0.084499817  | 6.277437023 | 0.000289697 |

## DEG.infomation

|           |              |             |             |
|-----------|--------------|-------------|-------------|
| NCAPG2    | -0.119577829 | 6.204987942 | 0.000291842 |
| NANP      | -0.102124747 | 6.200800745 | 0.000294018 |
| TUBGCP5   | 0.227282704  | 7.465654253 | 0.000294689 |
| HPS4      | 0.043099071  | 6.18314235  | 0.00029546  |
| PCDH12    | 0.202672743  | 6.670547384 | 0.000295709 |
| NXPH4     | 0.077485203  | 6.125531846 | 0.000296342 |
| RBM38     | -0.301112346 | 7.862806904 | 0.000296586 |
| SAAL1     | 0.156005631  | 8.373192313 | 0.000296912 |
| RAPGEF1   | -0.145845338 | 8.540247796 | 0.000297189 |
| ARHGAP10  | 0.226309843  | 8.994160188 | 0.000297431 |
| LOC388474 | -0.1354957   | 13.81335734 | 0.000297574 |
| CD109     | -0.124175842 | 6.241714672 | 0.000298    |
| LYPD2     | 0.123105913  | 6.389893655 | 0.000298384 |
| GMFB      | -0.228581769 | 9.484280454 | 0.000298671 |
| TTL1      | 0.099926348  | 6.423959931 | 0.000299035 |
| FAF2      | -0.172026595 | 9.307334794 | 0.000299175 |
| COX7A2    | 0.154678296  | 13.57767657 | 0.000299194 |
| LOC646531 | -0.221523129 | 12.35826927 | 0.000299539 |
| TBCE      | 0.139793387  | 8.665748605 | 0.000301188 |
| LOC652968 | -0.123625253 | 6.99670101  | 0.00030185  |
| SETDB2    | 0.278705328  | 8.081502032 | 0.000301854 |
| GNPDA1    | 0.155364711  | 9.412394265 | 0.000302831 |
| GSTM5     | 0.135638998  | 6.327700053 | 0.00030345  |
| ZNF549    | -0.263913273 | 11.21944619 | 0.000304405 |
| KATNAL2   | 0.094262063  | 6.38066773  | 0.000304409 |
| NUCKS1    | 0.265631594  | 7.522581114 | 0.000305571 |
| ZNF7      | 0.135313288  | 7.45154275  | 0.000305645 |
| ACOT4     | 0.149968137  | 6.620037848 | 0.000306706 |
| YBX1      | -0.1459143   | 11.49630028 | 0.000306707 |
| KIAA1328  | 0.126906031  | 6.632975534 | 0.000308597 |
| LOC550112 | 0.106269595  | 6.439491711 | 0.00030884  |
| HABP4     | 0.160418467  | 8.399593304 | 0.000310223 |
| EPHA2     | -0.147253351 | 6.405934944 | 0.000310529 |
| ILF2      | -0.214538689 | 10.00907546 | 0.000310571 |
| TRO       | 0.163116224  | 7.005807374 | 0.000310949 |
| NMI       | -0.198745943 | 7.260577873 | 0.000311389 |
| ARF1      | -0.1146303   | 9.88948019  | 0.000311735 |
| NPAT      | 0.161557225  | 6.53022696  | 0.000312183 |
| NR2C2     | -0.162041655 | 6.820915819 | 0.00031235  |
| LOC341457 | -0.248773163 | 12.69186859 | 0.000312642 |
| FLJ22374  | 0.143186336  | 6.932403635 | 0.000312668 |
| HK2       | -0.346414406 | 7.355359987 | 0.000313285 |
| CPXM2     | 0.4196779    | 7.872768802 | 0.000313523 |
| BCL11A    | 0.165693863  | 7.421518038 | 0.000314696 |
| FAM80A    | 0.149182389  | 7.006693192 | 0.000314911 |
| TMEM106C  | 0.293503377  | 8.869914843 | 0.000315007 |
| POLR2J3   | 0.163949006  | 8.852764626 | 0.000315075 |
| C7        | -0.491004879 | 8.969459028 | 0.000315347 |
| BAI3      | -0.152660543 | 6.493961634 | 0.000315512 |
| ZNF577    | -0.203156556 | 7.919215677 | 0.000316584 |
| OCRL      | -0.113563879 | 7.390294923 | 0.000316587 |

## DEG.infomation

|           |              |             |             |
|-----------|--------------|-------------|-------------|
| MFAP1     | 0.177603379  | 8.081161971 | 0.000316706 |
| C6ORF199  | 0.124127427  | 6.472926829 | 0.000317117 |
| PLEC1     | -0.0907287   | 6.615640678 | 0.000318201 |
| TMEM17    | -0.292555215 | 10.53055674 | 0.000319033 |
| PHF10     | 0.110699454  | 7.257336126 | 0.000319758 |
| DDX50     | 0.138784181  | 8.488223607 | 0.000320924 |
| TSR1      | -0.133578937 | 7.304164747 | 0.000322071 |
| SCMH1     | -0.10615541  | 7.76362593  | 0.00032299  |
| PFKM      | 0.338419606  | 11.67113455 | 0.00032305  |
| LOC348262 | -0.204541432 | 8.510324203 | 0.000323126 |
| ARPC2     | -0.13943264  | 10.12591709 | 0.000323389 |
| FAM186B   | 0.087681592  | 6.144920668 | 0.00032431  |
| AMOT      | 0.149376576  | 6.99167891  | 0.000324386 |
| CHST10    | 0.142556881  | 7.217747242 | 0.000324812 |
| TMEM104   | -0.123861528 | 6.252764309 | 0.000324923 |
| C14ORF19  | 0.165344084  | 6.369605358 | 0.000325001 |
| APAF1     | -0.107660189 | 6.966156198 | 0.00032622  |
| LOC442501 | 0.065460855  | 6.106087498 | 0.00032687  |
| BCOR      | 0.138574822  | 7.015136894 | 0.000327347 |
| FLJ46309  | -0.299205925 | 10.10757217 | 0.000327996 |
| KIF21A    | 0.216412273  | 8.42011933  | 0.000328688 |
| NCALD     | -0.179784276 | 8.119272243 | 0.00032969  |
| TNRC15    | 0.126870507  | 8.305334665 | 0.00033247  |
| LOC644039 | -0.164444256 | 13.40091638 | 0.000332753 |
| FLJ37464  | -0.144364113 | 6.435776363 | 0.000333057 |
| GSPT2     | 0.166760111  | 8.774698134 | 0.00033588  |
| NDFIP2    | -0.208234573 | 9.65663542  | 0.000336389 |
| NEDD8     | 0.104644651  | 12.12243483 | 0.000336891 |
| CSDE1     | 0.160793785  | 8.076254372 | 0.000336934 |
| LOC402560 | 0.203854869  | 8.392690931 | 0.00033703  |
| PLXDC2    | 0.261247888  | 7.703806829 | 0.000337598 |
| ALDH1L2   | -0.101942838 | 6.208083067 | 0.000338161 |
| SBF2      | 0.102587337  | 6.65784709  | 0.000338335 |
| LOX       | -0.153657946 | 6.341257351 | 0.00033956  |
| LTA       | 0.088979712  | 6.227887029 | 0.000339888 |
| C16ORF56  | -0.196992573 | 7.624983041 | 0.000340939 |
| TIGD1     | 0.083541579  | 6.227625222 | 0.000342568 |
| IL2RA     | -0.098154397 | 6.034218727 | 0.000342664 |
| GLRX      | 0.426501757  | 9.793786259 | 0.000342911 |
| HSPC268   | -0.258980968 | 9.559771572 | 0.000343065 |
| ORC4L     | 0.11882748   | 6.596420713 | 0.00034551  |
| MTG1      | -0.107096935 | 6.525595312 | 0.000345753 |
| NDUFC1    | 0.155705719  | 10.4817167  | 0.000345942 |
| GPR161    | -0.080284924 | 6.129921195 | 0.000347925 |
| FUCA2     | -0.104508951 | 7.481917857 | 0.000350706 |
| SERPINE2  | 0.549077184  | 11.54764238 | 0.000351183 |
| PLDN      | -0.176943992 | 8.972047514 | 0.000351233 |
| PGBD5     | 0.165110823  | 6.894982509 | 0.000352365 |
| C2ORF63   | 0.179614983  | 6.327642811 | 0.000352865 |
| ARL6IP5   | 0.15447663   | 11.50380449 | 0.000353747 |
| TNFSF13   | -0.077312612 | 6.116411664 | 0.000354213 |



## DEG.infomation

|                |              |             |             |
|----------------|--------------|-------------|-------------|
| UBE3B          | 0.207532122  | 7.64631983  | 0.000354716 |
| TMED3          | -0.280630816 | 10.35502322 | 0.000356042 |
| VPS37D         | 0.126566563  | 8.010484011 | 0.000356325 |
| VGf            | -0.1696214   | 6.172912153 | 0.000356592 |
| LOC347544      | -0.243724659 | 10.93635163 | 0.000357134 |
| LYPD5          | -0.083574663 | 6.132292849 | 0.000357192 |
| DPP7           | -0.175737209 | 8.067287398 | 0.000357959 |
| PTPN18         | -0.089289096 | 6.213383858 | 0.000358158 |
| C6ORF85        | 0.136815927  | 7.249182964 | 0.000358603 |
| TSPAN8         | 0.220779127  | 6.194834473 | 0.000359202 |
| NUDT9P1        | 0.108517635  | 6.279598521 | 0.000360319 |
| CYB561         | -0.081609033 | 6.606899314 | 0.000361126 |
| NAP1L2         | 0.087132254  | 6.424153747 | 0.000361167 |
| EBF2           | -0.085860846 | 6.252732827 | 0.000361549 |
| RNMT           | 0.194624118  | 9.377983948 | 0.000361853 |
| MOCS1          | -0.118236466 | 8.384451652 | 0.000362073 |
| C6ORF117       | 0.164723596  | 6.515212192 | 0.000362573 |
| INSC           | -0.080983861 | 6.154181    | 0.000366093 |
| ZNF669         | -0.163121031 | 7.011609141 | 0.000366493 |
| NIT2           | 0.172666228  | 8.925311292 | 0.000367639 |
| PLEKHN1        | 0.145506761  | 7.206073649 | 0.000370192 |
| TLN1           | -0.171390286 | 9.019186261 | 0.000370694 |
| MCAM           | 0.142829398  | 6.504331048 | 0.000371786 |
| ST6GAL1        | 0.135703282  | 8.274907142 | 0.000371848 |
| ZNF668         | -0.163455985 | 7.540667361 | 0.000371856 |
| NAT14          | -0.127419084 | 7.221702445 | 0.00037198  |
| ALG5           | -0.184773702 | 8.338516636 | 0.000372042 |
| ZNF34          | 0.127314583  | 7.107114989 | 0.00037207  |
| NIF3L1         | 0.123508258  | 9.593620225 | 0.000375499 |
| C7ORF26        | -0.146453953 | 8.055234448 | 0.000375856 |
| SRP72          | -0.168989934 | 7.749590562 | 0.000375976 |
| SRP9           | 0.191514373  | 10.77899222 | 0.000376995 |
| LOC399744      | -0.104417127 | 6.321653478 | 0.000377472 |
| SCCPDH         | 0.143257963  | 7.25146138  | 0.000378247 |
| TMEM129        | 0.174245019  | 6.709174561 | 0.000378304 |
| SPG3A          | 0.095551856  | 6.494098724 | 0.000379232 |
| APIP           | 0.173633558  | 8.386339767 | 0.000379796 |
| RAB17          | -0.2632714   | 7.279587926 | 0.000379872 |
| NEU1           | -0.168323639 | 7.869454133 | 0.000380236 |
| FAM174A        | 0.187622359  | 8.079890365 | 0.000380241 |
| NECAP2         | -0.16930518  | 7.9472175   | 0.000380326 |
| DKFZP686O24166 | 0.113393068  | 6.478323386 | 0.000380476 |
| AHSA2          | 0.340064373  | 7.338722104 | 0.000380623 |
| PMPCA          | 0.149070053  | 9.561936864 | 0.00038154  |
| RORA           | 0.088294161  | 6.567897342 | 0.000385208 |
| DNAJC5         | -0.13941766  | 6.991567527 | 0.00038608  |
| BRD3           | 0.214277632  | 8.642407405 | 0.00038724  |
| C8ORF58        | -0.098131451 | 6.422827566 | 0.000387727 |
| CLPP           | -0.14353312  | 8.709272895 | 0.000389148 |
| C11ORF67       | -0.27412852  | 10.31467092 | 0.000389433 |
| LOC729466      | 0.12169272   | 13.69256036 | 0.000390368 |

## DEG.infomation

|           |              |             |             |
|-----------|--------------|-------------|-------------|
| TMEM106B  | 0.255334946  | 7.756501486 | 0.000390551 |
| ASPM      | 0.122762396  | 6.397742568 | 0.00039064  |
| CCR6      | -0.177104024 | 12.39515882 | 0.00039099  |
| IDH3G     | -0.144164511 | 8.661418797 | 0.000391574 |
| TMEM161A  | 0.127277547  | 6.846915669 | 0.000392884 |
| LOC643466 | 0.111269503  | 6.325953963 | 0.000393003 |
| IL1B      | -0.112138309 | 6.125413705 | 0.000393083 |
| TRAPPC4   | -0.173862011 | 9.382684661 | 0.000393098 |
| TTC32     | 0.179340408  | 7.464690436 | 0.000395242 |
| PAK6      | 0.192904881  | 6.670532129 | 0.000395464 |
| GNAO1     | -0.107165585 | 6.275824597 | 0.000395848 |
| ARL2BP    | -0.165382202 | 10.19036273 | 0.000396312 |
| ZNF662    | 0.112150966  | 6.45744652  | 0.000396344 |
| TM6SF1    | -0.141165673 | 6.887293343 | 0.000396739 |
| UBC       | 0.158317881  | 13.76376127 | 0.000396795 |
| WDR24     | 0.12138276   | 6.810174966 | 0.0003969   |
| LOC123688 | -0.113038155 | 6.661731025 | 0.000397289 |
| TCF4      | 0.221583092  | 8.836167364 | 0.000397369 |
| FUBP3     | 0.155866495  | 8.400208619 | 0.000398627 |
| ABAT      | 0.13869711   | 6.317196295 | 0.000398872 |
| B3GALNT1  | 0.213494523  | 8.847705726 | 0.000398924 |
| C12ORF30  | 0.109713392  | 7.176045925 | 0.000401025 |
| C5ORF39   | 0.136351585  | 7.140220296 | 0.000401269 |
| SSR3      | -0.189626849 | 7.411659909 | 0.000401545 |
| HEATR6    | 0.15079335   | 7.115928865 | 0.000402428 |
| LOC642755 | -0.170999094 | 11.03607997 | 0.000403524 |
| GLUD1     | 0.133640658  | 10.04864226 | 0.000404649 |
| C6ORF151  | -0.160837138 | 6.640202293 | 0.00040486  |
| C10ORF84  | 0.10075197   | 6.692381218 | 0.000404882 |
| FCER2     | -0.092351    | 6.06926987  | 0.000405355 |
| TMEM178   | 0.18209249   | 6.834566821 | 0.000405696 |
| REP15     | -0.145739909 | 6.482245923 | 0.00040578  |
| AKTIP     | -0.190625902 | 9.761287835 | 0.000405866 |
| BNIP1     | 0.052390398  | 6.245996103 | 0.000406076 |
| NIPSNAP3A | 0.147777296  | 6.980113266 | 0.000406091 |
| DAP3      | 0.153724547  | 9.993595943 | 0.000406546 |
| SNORD13   | 0.345578058  | 7.845441294 | 0.000406659 |
| FAM158A   | 0.128533394  | 7.764044033 | 0.000407858 |
| NAGK      | -0.125376711 | 9.252475962 | 0.000408465 |
| TMEM192   | 0.125868098  | 7.004355722 | 0.000411699 |
| STK4      | -0.169296187 | 8.685468991 | 0.000411762 |
| CANT1     | -0.147756923 | 8.051230479 | 0.000412692 |
| MTMR14    | 0.168163765  | 8.562366879 | 0.000412805 |
| SLC25A36  | 0.231276199  | 8.248571184 | 0.000414244 |
| CPNE5     | -0.251124116 | 6.236508148 | 0.000414869 |
| SNRPA     | -0.134425607 | 7.783034913 | 0.000416854 |
| LOC400879 | 0.081643086  | 6.169340785 | 0.000417827 |
| TMEM54    | 0.180160372  | 7.256978831 | 0.000418218 |
| PGRMC1    | -0.16333999  | 9.366014184 | 0.0004186   |
| MYL6      | -0.247589279 | 12.58900797 | 0.000419688 |
| TRUB2     | 0.137584782  | 7.30973119  | 0.000419726 |

## DEG.infomation

|           |              |             |             |
|-----------|--------------|-------------|-------------|
| FAM107B   | 0.23828088   | 7.2613172   | 0.000421341 |
| ULK1      | 0.208807945  | 9.677417613 | 0.000421861 |
| SH3BP4    | -0.161465001 | 7.90095033  | 0.000422036 |
| SIL1      | -0.138260976 | 8.445557346 | 0.000422627 |
| RNF34     | 0.14416185   | 8.445035528 | 0.000422973 |
| IL10RA    | -0.113942064 | 6.441424382 | 0.000423174 |
| FBXL10    | 0.111536233  | 7.644519474 | 0.000423332 |
| COG7      | 0.116066671  | 6.802017014 | 0.000424159 |
| LAMP1     | -0.138568214 | 11.14201686 | 0.000424724 |
| C1ORF123  | 0.185793013  | 9.917560933 | 0.000426681 |
| NCF1      | -0.113736833 | 6.161063812 | 0.000427729 |
| MAST4     | -0.20495858  | 9.66328587  | 0.000429325 |
| P2RX4     | -0.148385802 | 7.038596158 | 0.000429416 |
| LOC728772 | -0.067142467 | 6.352334404 | 0.000431219 |
| LOC653610 | -0.161980266 | 6.385924087 | 0.000432115 |
| NLRP7     | 0.104743175  | 6.371429281 | 0.00043298  |
| ASF1A     | 0.20426963   | 7.999585383 | 0.000433114 |
| MATR3     | 0.11622186   | 8.6885702   | 0.000433673 |
| LOC653506 | -0.214700212 | 10.87368036 | 0.000438088 |
| FAM13C1   | 0.076917024  | 6.182069371 | 0.000438094 |
| ATXN7L3   | -0.164865648 | 7.785939759 | 0.000439177 |
| EDN2      | -0.096125717 | 6.040198948 | 0.000440612 |
| MMP2      | -0.101660219 | 6.690021112 | 0.000446851 |
| VPS36     | 0.198342778  | 9.023580594 | 0.000446949 |
| UBE2A     | 0.180870955  | 9.142721991 | 0.000448276 |
| SIGLEC16  | -0.135203616 | 6.20970475  | 0.000450659 |
| CDK10     | -0.106446564 | 7.571557219 | 0.000450732 |
| TC2N      | -0.12627081  | 6.194902748 | 0.000451819 |
| NUDT3     | 0.163305314  | 9.495652485 | 0.000452906 |
| ZSCAN12   | 0.101880756  | 6.309426226 | 0.00045317  |
| ZNF679    | 0.100710913  | 6.120488462 | 0.000453945 |
| TMEM218   | 0.134177995  | 7.61458516  | 0.000457074 |
| LOC642852 | 0.131260554  | 6.288699463 | 0.000460843 |
| SLC7A6    | 0.178350872  | 8.071942415 | 0.00046199  |
| AASDHPPT  | 0.199206014  | 8.37884803  | 0.000462689 |
| MSH2      | 0.096838801  | 6.334859882 | 0.00046375  |
| C19ORF4   | 0.191077017  | 6.592656728 | 0.000465078 |
| CRYZ      | 0.285271506  | 10.00184204 | 0.000466199 |
| HSF2      | -0.190759744 | 8.048810988 | 0.000467043 |
| KIF13B    | 0.161516262  | 7.686963338 | 0.000467248 |
| AKAP12    | -0.177638267 | 6.658204548 | 0.000467381 |
| LOC654201 | 0.095771377  | 6.079270914 | 0.000470209 |
| NAP1L5    | 0.2270611    | 7.757366358 | 0.000472347 |
| FAM78B    | -0.121348017 | 6.395944557 | 0.000474434 |
| DIS3      | 0.100905385  | 6.465178401 | 0.000474902 |
| PRMT5     | -0.151244356 | 8.382912289 | 0.000476272 |
| LOC441034 | -0.125035011 | 13.51130371 | 0.00047703  |
| SLFNL1    | -0.104995228 | 6.084483472 | 0.000478964 |
| LOC644162 | 0.257901172  | 7.899513735 | 0.000480527 |
| TATDN2    | -0.161648859 | 7.450169305 | 0.000480954 |
| CYP2S1    | -0.06706461  | 6.183477715 | 0.000481163 |

## DEG.infomation

|           |              |             |             |
|-----------|--------------|-------------|-------------|
| ANKRD57   | -0.163535616 | 8.028753994 | 0.000481213 |
| STT3A     | -0.195325432 | 9.008082675 | 0.000482848 |
| LPPR4     | 0.096477777  | 6.13711725  | 0.000482992 |
| MGC61598  | 0.260061379  | 7.727701944 | 0.000483181 |
| ASH2L     | 0.137168424  | 9.276479235 | 0.000484097 |
| RALA      | -0.163055307 | 9.916999442 | 0.000485913 |
| FLJ44076  | 0.08763846   | 6.11743639  | 0.000486555 |
| C9ORF72   | 0.092585623  | 6.761581899 | 0.000487801 |
| WDR21B    | 0.114758878  | 6.697558687 | 0.000489592 |
| HRASLS3   | -0.184771367 | 11.27957092 | 0.000490494 |
| HP        | -0.098027921 | 6.115513232 | 0.0004922   |
| LOC642412 | 0.150101997  | 6.970275152 | 0.000492529 |
| PTPRA     | 0.070456611  | 7.070894858 | 0.000496206 |
| UBE4B     | 0.202319199  | 8.65376659  | 0.000497167 |
| FAM108A3  | -0.128506754 | 7.373765373 | 0.000498254 |
| BCAR3     | -0.297842678 | 8.079740773 | 0.000499387 |
| C11ORF68  | 0.146434373  | 7.44178663  | 0.00049954  |
| ADI1      | 0.405861349  | 8.061842272 | 0.000500342 |
| CCDC128   | 0.253978835  | 7.472160026 | 0.000500663 |
| COL10A1   | 0.176321065  | 6.140842109 | 0.00050182  |
| CXCL12    | -0.227097902 | 8.77196414  | 0.000502183 |
| VIPR2     | 0.25122233   | 7.535853226 | 0.000502579 |
| FLJ20254  | -0.219549553 | 6.917905901 | 0.000503819 |
| SLC7A2    | -0.21786119  | 7.360295418 | 0.000506809 |
| LSM3      | 0.190810748  | 10.3783068  | 0.00050704  |
| AHNAK     | 0.15562732   | 10.21434743 | 0.000511324 |
| ANAPC4    | 0.131608158  | 8.63670284  | 0.000511606 |
| CCDC101   | 0.111863526  | 7.253105179 | 0.000512003 |
| RAB30     | 0.106120254  | 6.368265648 | 0.000513219 |
| ALS2CL    | -0.067887985 | 6.183339035 | 0.000513431 |
| ASB16     | 0.100026965  | 6.212355327 | 0.00051401  |
| CLIC3     | -0.241626918 | 6.749185341 | 0.00051404  |
| ADCY4     | -0.219724    | 8.62922394  | 0.000514286 |
| SPIN1     | 0.137770045  | 7.26899352  | 0.000515554 |
| LOC729603 | -0.221231487 | 12.90359156 | 0.000516626 |
| RCBTB1    | 0.118493429  | 6.859826539 | 0.000517735 |
| WHSC1     | 0.062979473  | 6.12488812  | 0.000518117 |
| SLC1A3    | -0.292088893 | 9.675603849 | 0.000518364 |
| CLEC2D    | 0.2487611    | 10.70210605 | 0.000518787 |
| MFAP3     | -0.145147457 | 7.099247013 | 0.000519746 |
| LOC645196 | 0.098650262  | 6.382069342 | 0.000520252 |
| TTC1      | 0.200132904  | 9.151451836 | 0.000522454 |
| MYBBP1A   | -0.159792469 | 6.469166077 | 0.000522521 |
| NMNAT2    | 0.080439794  | 6.337254766 | 0.000523883 |
| E2F8      | 0.104450652  | 6.047861152 | 0.000524783 |
| SF4       | 0.12409252   | 8.055425763 | 0.000527658 |
| ST7       | -0.086263805 | 7.906222316 | 0.000529601 |
| CDCP1     | -0.050791734 | 6.127185307 | 0.000529819 |
| C5ORF44   | 0.153729522  | 6.792816504 | 0.00052994  |
| PXMP3     | 0.15066764   | 8.036806252 | 0.000531262 |
| RPS19     | -0.183094528 | 12.88968937 | 0.000531456 |

## DEG.infomation

|           |              |             |             |
|-----------|--------------|-------------|-------------|
| LMBRD2    | 0.06003304   | 6.333512784 | 0.000531777 |
| ADAMTS7   | -0.144628323 | 6.251813857 | 0.000532815 |
| C2ORF29   | 0.14034968   | 10.4866821  | 0.000533019 |
| CA1       | 0.088126344  | 6.011877648 | 0.00053714  |
| MDH2      | -0.122702756 | 13.58937257 | 0.000538728 |
| GPSM1     | -0.22053151  | 8.957165291 | 0.000539136 |
| KLHL6     | -0.090381541 | 6.189609112 | 0.000539315 |
| HCFC1R1   | 0.189482835  | 9.530179924 | 0.000539569 |
| LOC649422 | 0.18268789   | 6.815784728 | 0.000540197 |
| C6ORF205  | 0.089814462  | 6.574245999 | 0.000540361 |
| GRK6      | -0.082725218 | 6.669477954 | 0.000540934 |
| LYNX1     | 0.05937949   | 6.072666743 | 0.0005412   |
| RPS18     | -0.209046728 | 12.07646867 | 0.000542556 |
| NSMAF     | -0.136683139 | 8.956017315 | 0.000544628 |
| SIGLEC5   | -0.072937781 | 6.110898204 | 0.000546328 |
| DDX5      | -0.146381017 | 11.48917631 | 0.000546789 |
| C11ORF51  | 0.188607739  | 7.533002217 | 0.000548121 |
| MYBPH     | -0.147108712 | 6.247121634 | 0.000549165 |
| C10ORF141 | -0.104259308 | 6.508140243 | 0.000551359 |
| SERP1     | -0.154598566 | 7.199266696 | 0.000551397 |
| NFRKB     | 0.099892082  | 6.503886399 | 0.000553609 |
| KALRN     | 0.070291216  | 6.116032457 | 0.000553809 |
| CEACAM1   | -0.134594641 | 6.993069853 | 0.000554447 |
| AKAP1     | 0.260080886  | 7.741681547 | 0.00055547  |
| GRPEL1    | -0.168764958 | 9.390153424 | 0.000557732 |
| HSPBP1    | -0.094990055 | 6.564847338 | 0.000558146 |
| LRRC42    | -0.173980642 | 8.618199724 | 0.000558607 |
| WDR73     | -0.13082174  | 7.020278243 | 0.000559267 |
| C16ORF59  | -0.104000494 | 6.272813902 | 0.000561584 |
| SEN7      | 0.144978987  | 7.52467219  | 0.000564084 |
| STK36     | 0.166333768  | 7.92719583  | 0.000566356 |
| TUBD1     | 0.208199358  | 7.01321028  | 0.000567868 |
| CLYBL     | 0.182803676  | 8.561141565 | 0.000568576 |
| LMOD1     | 0.135319135  | 6.602540872 | 0.000569162 |
| IGSF22    | -0.090853503 | 6.039098722 | 0.000570055 |
| MAGED4B   | -0.078017265 | 6.298224962 | 0.000571036 |
| DEFB103B  | -0.087109228 | 6.054302348 | 0.000572307 |
| TANC1     | 0.197009279  | 9.327507437 | 0.000577514 |
| PMS1      | 0.12204622   | 6.480900403 | 0.000579433 |
| DPY19L1   | -0.148547337 | 9.14578036  | 0.000580611 |
| TBL3      | -0.138179916 | 6.913705127 | 0.000582786 |
| MIB2      | -0.202635087 | 7.796155202 | 0.000583357 |
| PEX6      | 0.225611569  | 7.310903892 | 0.000583754 |
| LRP8      | -0.086997336 | 6.137586201 | 0.000584114 |
| ALG1      | -0.111911141 | 6.442401426 | 0.000586274 |
| PIK3R2    | 0.180752839  | 10.36912433 | 0.000587725 |
| UBE2T     | 0.20559828   | 7.755767805 | 0.000587837 |
| LOC284023 | 0.119982408  | 6.994052875 | 0.000587851 |
| SC5DL     | 0.208827443  | 9.182687147 | 0.000590085 |
| BCAR1     | -0.186594437 | 7.850864357 | 0.000590589 |
| ADARB1    | -0.124037394 | 7.562555232 | 0.000593879 |

## DEG.infomation

|           |              |             |             |
|-----------|--------------|-------------|-------------|
| DKK2      | 0.104715336  | 6.248961372 | 0.000595103 |
| CALCB     | -0.150938338 | 6.151770101 | 0.000595985 |
| KIAA1012  | 0.152804991  | 8.913372587 | 0.000598079 |
| IL17RA    | -0.132038571 | 6.405830216 | 0.00059841  |
| RIPK3     | -0.108993297 | 6.719873281 | 0.000599112 |
| CARD11    | -0.115283451 | 6.976630351 | 0.000599145 |
| LOC339123 | -0.155516577 | 11.29802019 | 0.000601587 |
| MAP4K1    | -0.08501271  | 6.328734948 | 0.000604142 |
| NDUFC2    | 0.134281552  | 6.651447056 | 0.000605135 |
| ZNF580    | 0.095277204  | 6.749418194 | 0.000610037 |
| NAT1      | -0.058695381 | 6.265216897 | 0.000610154 |
| STC1      | -0.379096757 | 7.160871221 | 0.000610174 |
| KIAA1202  | -0.175931053 | 6.811466726 | 0.000610542 |
| SDCCAG8   | 0.105618466  | 6.849586418 | 0.000610984 |
| PIGU      | -0.140218836 | 8.394341083 | 0.000611905 |
| SUSD3     | -0.090548463 | 6.270784456 | 0.00061365  |
| RHOBTB1   | 0.094541448  | 6.30006872  | 0.000613875 |
| SPCS3     | -0.219315571 | 7.253799947 | 0.000614851 |
| POLA1     | 0.126164087  | 7.279412492 | 0.000615529 |
| ADAR      | -0.124240877 | 8.886213435 | 0.000615983 |
| SAMD8     | 0.127043662  | 6.404202244 | 0.000616798 |
| FKBP9     | 0.079883103  | 6.255381226 | 0.000617081 |
| SMAD5     | 0.149949648  | 8.265821442 | 0.000618054 |
| ZSWIM3    | 0.050731387  | 6.203760837 | 0.000620885 |
| EIF2S2    | -0.101352322 | 6.634519739 | 0.000621869 |
| PHLPPL    | 0.103309307  | 6.497048929 | 0.000621885 |
| EID1      | 0.169051935  | 7.469830637 | 0.000623795 |
| LOC442421 | -0.13327788  | 6.378795697 | 0.000624409 |
| C19ORF53  | 0.144313973  | 10.12620714 | 0.000624445 |
| RPL26L1   | 0.177273674  | 8.833850292 | 0.00062599  |
| HELZ      | 0.165294505  | 7.90548577  | 0.000626507 |
| CD36      | 0.256003203  | 11.42037982 | 0.000626657 |
| RAB33B    | 0.282425277  | 7.694504591 | 0.000631108 |
| LOC285016 | 0.318125486  | 6.906584091 | 0.000634768 |
| C3ORF21   | -0.157289024 | 7.65252966  | 0.000635641 |
| ABHD14B   | 0.140400635  | 6.672094311 | 0.000637722 |
| ENPP4     | -0.178918234 | 7.794622584 | 0.00063826  |
| SFXN2     | 0.107759651  | 6.626375246 | 0.000639839 |
| TIMM8A    | 0.193339499  | 7.299845893 | 0.000642267 |
| ABLIM1    | 0.171114002  | 11.51719504 | 0.000642519 |
| GPR83     | 0.082518247  | 6.171315715 | 0.000643152 |
| PIF1      | 0.084359875  | 6.195750431 | 0.000643554 |
| BCAT2     | -0.153624449 | 8.534048092 | 0.00064378  |
| COL27A1   | -0.125514733 | 6.273065825 | 0.000644891 |
| LOC647326 | -0.089526332 | 6.073588435 | 0.00064548  |
| PEX11B    | 0.145545537  | 9.642765206 | 0.000646583 |
| C10ORF58  | -0.128900317 | 11.31667078 | 0.000647588 |
| MALL      | -0.242038633 | 8.205021869 | 0.000648633 |
| PIPSL     | -0.212109289 | 8.517705155 | 0.000652627 |
| SMO       | 0.101828462  | 6.604417477 | 0.000653005 |
| KBTBD11   | -0.217580086 | 8.742841084 | 0.00065377  |

## DEG.infomation

|           |              |             |             |
|-----------|--------------|-------------|-------------|
| MGC33846  | 0.126499303  | 6.236767797 | 0.000659308 |
| CRIM1     | 0.290127182  | 8.077099676 | 0.000660657 |
| JMJD5     | 0.095969225  | 6.145946872 | 0.000661027 |
| LARGE     | -0.190091435 | 9.777486604 | 0.000663398 |
| PEX13     | 0.09679274   | 6.961684273 | 0.000664305 |
| MAP6D1    | 0.138696719  | 7.626677822 | 0.000664456 |
| UNC50     | 0.125763689  | 10.2618236  | 0.000668611 |
| RABL2B    | -0.086809289 | 7.175362722 | 0.0006707   |
| KIAA0363  | -0.167421155 | 7.089869956 | 0.000671821 |
| HOXB7     | -0.113565641 | 6.136234172 | 0.000672459 |
| COIL      | 0.102564224  | 7.954013342 | 0.000673333 |
| ZBBX      | 0.105013429  | 6.62455412  | 0.000675494 |
| RPA3      | 0.173089116  | 9.508372295 | 0.000675495 |
| CDS1      | -0.11742128  | 6.091122286 | 0.000675746 |
| LOC643011 | 0.110094592  | 6.776110769 | 0.000676197 |
| GOLGA2    | -0.173230977 | 7.660549731 | 0.000676435 |
| SMC6      | 0.197963015  | 6.752327464 | 0.000682403 |
| PCOLCE2   | 0.273258807  | 11.12835111 | 0.000685079 |
| METT10D   | 0.1219902    | 6.974474381 | 0.000685233 |
| PSME3     | -0.101591411 | 8.080307298 | 0.000685543 |
| TTC18     | 0.119728423  | 6.427069159 | 0.000686538 |
| AFF4      | -0.248724005 | 7.587823684 | 0.000687783 |
| SR140     | 0.128811495  | 7.963514322 | 0.000688439 |
| ZNF573    | 0.183319482  | 7.589746016 | 0.000689155 |
| C12ORF10  | -0.131827099 | 9.301144238 | 0.0006896   |
| FEZ2      | 0.155266761  | 10.07845153 | 0.000689807 |
| ANKRD50   | 0.185055375  | 7.731761056 | 0.000691231 |
| SYNJ2BP   | 0.250194093  | 9.702193904 | 0.000692659 |
| BTBD12    | -0.149932669 | 7.097898726 | 0.000692862 |
| SS18      | 0.113368857  | 8.226633542 | 0.000695535 |
| RHOA      | -0.172407452 | 11.24832665 | 0.000696955 |
| LOC643509 | -0.180656234 | 12.6807459  | 0.000697943 |
| PAN3      | 0.153724689  | 7.961682033 | 0.00070019  |
| GTF2H1    | 0.179239423  | 7.193089859 | 0.000700918 |
| DHPS      | 0.116313433  | 8.968356175 | 0.000702939 |
| ODF3L2    | -0.105429065 | 6.31051395  | 0.000705626 |
| LOC731777 | 0.194001337  | 7.854632938 | 0.000705716 |
| EEA1      | 0.107948823  | 6.517112504 | 0.000706578 |
| CFL2      | 0.202684808  | 7.372035149 | 0.000707141 |
| HSPB1     | -0.218241934 | 14.00589844 | 0.000708692 |
| TTF2      | -0.143568838 | 7.132893234 | 0.000709038 |
| FAM127B   | -0.109920898 | 7.956317484 | 0.000709102 |
| LOC136143 | -0.175864549 | 8.277905155 | 0.000709659 |
| OGN       | 0.266375603  | 6.93832029  | 0.000710309 |
| BACE2     | -0.143014539 | 7.111716835 | 0.000710857 |
| FGF12     | -0.654953529 | 8.197015462 | 0.000712215 |
| FGFR1     | 0.081621562  | 6.255975433 | 0.000713338 |
| LOC649169 | -0.123651795 | 6.547561512 | 0.000713947 |
| SLC22A16  | -0.099350381 | 6.025601405 | 0.000714723 |
| MGAT2     | -0.162241735 | 7.448137549 | 0.000716871 |
| LOC730092 | 0.085203409  | 6.404478528 | 0.000718547 |

## DEG.infomation

|           |              |             |             |
|-----------|--------------|-------------|-------------|
| ST14      | -0.102224783 | 6.057782967 | 0.000722819 |
| PLD1      | 0.249899344  | 8.200876831 | 0.000722863 |
| POU5F1P1  | -0.067888895 | 6.05975304  | 0.000729761 |
| TNIP2     | -0.167395364 | 6.390248869 | 0.000730199 |
| UCP2      | 0.26351264   | 7.362766505 | 0.000731648 |
| SLC35A5   | 0.176638707  | 9.061954971 | 0.000735034 |
| MGC12966  | 0.161591411  | 8.07446631  | 0.000736721 |
| HLA-DOB   | -0.0912274   | 6.190171981 | 0.000737598 |
| ZNF432    | 0.108602528  | 6.823452135 | 0.000737665 |
| CTR9      | 0.117074966  | 6.928886499 | 0.000738339 |
| ZNF513    | -0.107176665 | 6.797199674 | 0.000740241 |
| SLC16A4   | 0.085170738  | 6.301508481 | 0.000741336 |
| ITPKB     | -0.158402305 | 7.600769216 | 0.000741878 |
| CHST1     | -0.157050183 | 6.625392419 | 0.000742061 |
| SPARCL1   | -0.200550706 | 12.42252984 | 0.000743131 |
| HSDL2     | 0.267310604  | 10.22059326 | 0.000744093 |
| LIG3      | -0.072051681 | 6.580507219 | 0.000744454 |
| PLOD1     | -0.191395592 | 10.50257783 | 0.000746402 |
| ZNF260    | 0.122813374  | 7.339145985 | 0.000747213 |
| PHLDA2    | -0.117655442 | 6.142838661 | 0.000747301 |
| QDPR      | 0.220484414  | 10.47118155 | 0.000747325 |
| C3ORF64   | 0.189782212  | 7.779281733 | 0.000749479 |
| GHDC      | 0.111664071  | 6.96801612  | 0.000754134 |
| NOL12     | -0.118101579 | 7.495048119 | 0.000760377 |
| PCBP3     | -0.104153541 | 6.144895983 | 0.000761792 |
| ATRNL1    | 0.100072384  | 6.172028606 | 0.000765507 |
| RSBN1L    | 0.137811921  | 6.977626654 | 0.000766427 |
| ARHGEF4   | 0.089359877  | 6.10736365  | 0.000767321 |
| RGN       | 0.176621     | 7.167441444 | 0.000768828 |
| ZNF585A   | 0.107604081  | 7.07019425  | 0.000769352 |
| PHF2      | -0.11772827  | 7.521809638 | 0.000770982 |
| LGI1      | 0.07348062   | 6.063184061 | 0.000771182 |
| CASP7     | -0.075361863 | 6.348729588 | 0.000772701 |
| COPG2     | 0.235982784  | 6.791264512 | 0.000773224 |
| CSHL1     | 0.066402545  | 6.356579738 | 0.000774051 |
| ALG2      | -0.064493219 | 6.231942867 | 0.000775709 |
| TSPAN18   | -0.324587292 | 8.153467719 | 0.000779534 |
| FTSJD1    | 0.114663152  | 7.285395502 | 0.00078051  |
| LOC654174 | -0.097643854 | 6.298230263 | 0.00078185  |
| PSAT1     | -0.105729628 | 6.11650458  | 0.000784474 |
| RAB12     | 0.164951475  | 6.72284146  | 0.000784936 |
| DEPDC1B   | -0.063936843 | 6.026934563 | 0.000786596 |
| KIAA0513  | -0.111786504 | 6.692525793 | 0.000787345 |
| SOX8      | 0.223422844  | 7.390242507 | 0.00078982  |
| ARHGAP30  | -0.103531821 | 7.00302823  | 0.000790229 |
| FAM39E    | -0.189367279 | 10.59276751 | 0.000790726 |
| VIT       | -0.174429818 | 6.478627739 | 0.000792072 |
| HIST2H4A  | 0.130022622  | 6.701397517 | 0.000793468 |
| PCIF1     | 0.09087324   | 6.745910884 | 0.000796255 |
| C10RF170  | -0.235921132 | 7.239141119 | 0.000796326 |
| EBF1      | -0.187247866 | 7.727137357 | 0.000798758 |



## DEG.infomation

|           |              |             |             |
|-----------|--------------|-------------|-------------|
| MARCH1    | -0.071965084 | 6.069896545 | 0.000798763 |
| ANXA6     | 0.107765791  | 7.438745002 | 0.000803753 |
| ECT2      | -0.19924235  | 7.084946357 | 0.00080533  |
| SETD1B    | 0.106538573  | 6.708625436 | 0.000805991 |
| PSMA4     | -0.111596077 | 9.873664425 | 0.000807277 |
| LYG1      | -0.088418228 | 6.235431205 | 0.000809421 |
| C1GALT1   | 0.178980169  | 6.928289777 | 0.000810447 |
| MSR1      | -0.088241593 | 6.118734672 | 0.000812687 |
| SLC26A9   | 0.256469666  | 6.847141025 | 0.000814106 |
| CCDC21    | 0.266150829  | 8.771140963 | 0.000819187 |
| SF3A3     | -0.141533562 | 9.307676294 | 0.00081983  |
| TRIM47    | -0.185604722 | 7.189719146 | 0.000820013 |
| LOC346887 | -0.151366106 | 6.493133895 | 0.000820345 |
| NXF1      | -0.136923415 | 8.8926719   | 0.00082048  |
| PIP3-E    | 0.136202098  | 6.463967379 | 0.000822009 |
| LOC653884 | 0.132337589  | 7.656538052 | 0.000822449 |
| CR1       | -0.053179    | 6.025249247 | 0.000829412 |
| MGP       | -0.361612701 | 12.24350673 | 0.00083074  |
| PLAC8     | -0.090160711 | 6.229150054 | 0.000830858 |
| DIS3L     | 0.191148409  | 9.749964412 | 0.000831332 |
| UBL3      | 0.151299558  | 9.803179565 | 0.000831382 |
| CCDC56    | 0.11892658   | 10.00749694 | 0.000831907 |
| NTN1      | -0.198883244 | 6.913123609 | 0.000835109 |
| C1ORF97   | 0.212282786  | 8.008718591 | 0.00083567  |
| CCL23     | -0.093382943 | 6.372312613 | 0.00083797  |
| KIAA0859  | -0.114039173 | 8.41691096  | 0.000838088 |
| EAF2      | -0.094214536 | 6.400319411 | 0.0008426   |
| PJA1      | 0.107994653  | 6.958480416 | 0.000843101 |
| CRELD1    | 0.161502528  | 8.337135804 | 0.000843439 |
| LOC652671 | -0.069703246 | 6.151176676 | 0.000843471 |
| GART      | -0.119258887 | 7.678079049 | 0.000843898 |
| LOC339879 | 0.073428502  | 6.014969752 | 0.00084614  |
| LOC644584 | -0.138753252 | 6.623843202 | 0.000849129 |
| RIN3      | -0.116067403 | 6.286290589 | 0.000849518 |
| LOC283547 | -0.096986492 | 6.19456616  | 0.000849965 |
| IMPA2     | -0.229667233 | 8.540139188 | 0.000850911 |
| LRRC33    | -0.138381123 | 6.595975834 | 0.000851359 |
| EID2B     | -0.241093559 | 10.37482408 | 0.000852598 |
| CLN3      | -0.094328491 | 6.905343796 | 0.000852804 |
| RBM22     | 0.125378932  | 10.63109576 | 0.000853829 |
| RNF217    | 0.178740679  | 7.179333976 | 0.000855708 |
| LRRC28    | 0.129335452  | 8.028255137 | 0.0008565   |
| TERC      | -0.121738614 | 6.137070857 | 0.000857415 |
| LPPR2     | -0.167488301 | 6.698511284 | 0.000858057 |
| HLA-DQA1  | -0.375944522 | 7.552628844 | 0.000859371 |
| ZNF32     | 0.109401981  | 7.805327433 | 0.000859588 |
| CNOT7     | 0.10363488   | 8.052985107 | 0.000860055 |
| MED28     | -0.143426454 | 8.243238934 | 0.00086332  |
| LOC554203 | 0.228035124  | 7.161328871 | 0.00086519  |
| TGM2      | -0.291515836 | 9.815858821 | 0.000866694 |
| TCP11L2   | 0.082662353  | 6.310630608 | 0.000867948 |

## DEG.infomation

|           |              |             |             |
|-----------|--------------|-------------|-------------|
| DTNA      | 0.140557207  | 11.36462029 | 0.000868984 |
| PIGA      | -0.149413311 | 7.186486235 | 0.00086969  |
| YIPF5     | 0.140339233  | 7.047759409 | 0.000870557 |
| SLC29A2   | -0.213656867 | 7.432794895 | 0.000872769 |
| SFRS7     | 0.184293562  | 8.981840006 | 0.000873077 |
| LOC642197 | 0.16399163   | 9.419584477 | 0.000875765 |
| LOC648366 | -0.079577429 | 6.227228844 | 0.000876457 |
| ITGA9     | 0.180584063  | 7.16452219  | 0.000879399 |
| RNF40     | -0.108349393 | 6.840640806 | 0.000882676 |
| PELO      | -0.169717817 | 9.72002435  | 0.000882804 |
| LOC440345 | -0.123093214 | 6.579965565 | 0.000883163 |
| COG3      | 0.14235013   | 7.201127606 | 0.000883443 |
| PROSAPIP1 | -0.136439079 | 6.795636888 | 0.000884545 |
| KPNA1     | -0.146074491 | 7.941305578 | 0.000884888 |
| TTC26     | 0.105025552  | 6.610207592 | 0.000886834 |
| PALB2     | 0.09120276   | 6.685557756 | 0.00088795  |
| TRPV1     | 0.060633612  | 6.184400509 | 0.000887978 |
| KIAA1407  | 0.080479032  | 6.243874505 | 0.000889223 |
| SOLH      | -0.122601405 | 6.482619151 | 0.00089148  |
| RPL22     | 0.224708545  | 10.97124724 | 0.00089431  |
| CRSP6     | 0.103066554  | 6.316045779 | 0.000894566 |
| CDT1      | -0.100855187 | 5.984452562 | 0.000896435 |
| HRB       | -0.103661756 | 6.543053233 | 0.000902239 |
| EPST11    | -0.290828387 | 7.353591904 | 0.000907533 |
| SNTB1     | 0.127328974  | 7.120762187 | 0.00090973  |
| LRP10     | -0.203113837 | 8.552612442 | 0.000910544 |
| LOC131873 | -0.165192467 | 6.326805611 | 0.000911849 |
| CCDC127   | 0.177600786  | 7.451753579 | 0.000912239 |
| IGFBP6    | -0.275119081 | 9.445826957 | 0.000915816 |
| PNMA1     | 0.153138255  | 7.195227566 | 0.000917564 |
| C9ORF40   | -0.121561196 | 6.771226663 | 0.000921242 |
| ETV4      | 0.080779314  | 6.247893569 | 0.000921491 |
| PSME1     | -0.206620274 | 9.704548137 | 0.00092309  |
| NPSR1     | 0.11108004   | 6.913753937 | 0.000925717 |
| PARP10    | -0.137223447 | 6.596297236 | 0.000926106 |
| ZBED1     | 0.195489982  | 10.5673042  | 0.000927782 |
| FLJ38482  | 0.203444263  | 8.287041462 | 0.00092903  |
| IRF9      | -0.215317092 | 9.282947179 | 0.000929356 |
| LOC400657 | 0.164646363  | 7.763692554 | 0.000935795 |
| RPAP3     | 0.115969959  | 7.291544527 | 0.000936197 |
| PCSK6     | -0.05295165  | 6.106573001 | 0.000937338 |
| BRD4      | -0.070129549 | 6.310394787 | 0.000939136 |
| FEZ1      | 0.222334774  | 8.406793323 | 0.000939561 |
| SMARCC2   | 0.143683153  | 7.303590538 | 0.000941254 |
| C1ORF85   | -0.150474278 | 8.873367088 | 0.000943274 |
| LOC647958 | 0.11768893   | 6.1794526   | 0.000944613 |
| DPP9      | -0.17977662  | 8.794881387 | 0.000945112 |
| C16ORF75  | 0.134845234  | 7.911560687 | 0.000949916 |
| PABPN1    | -0.192919858 | 8.883766513 | 0.000950076 |
| ALKBH5    | -0.138731028 | 12.63824504 | 0.000950102 |
| MYO1C     | 0.148847811  | 7.762090493 | 0.000952167 |

## DEG.infomation

|           |              |             |             |
|-----------|--------------|-------------|-------------|
| HLA-F     | -0.232797764 | 8.469511001 | 0.000952566 |
| RAD51     | -0.087130271 | 6.832995513 | 0.000953722 |
| LOC644852 | -0.137979323 | 6.563395869 | 0.000954686 |
| C21ORF33  | 0.18810758   | 10.85715633 | 0.000955206 |
| SP3       | 0.118870006  | 7.121127923 | 0.000955615 |
| MRPS21    | 0.162615593  | 10.24654031 | 0.000960035 |
| KIF13A    | 0.099955066  | 6.279756879 | 0.000966906 |
| CALCOCO1  | 0.16856093   | 8.205536564 | 0.000972456 |
| MPI       | 0.15994275   | 7.102023248 | 0.000973263 |
| KLHL20    | 0.147107023  | 7.532156987 | 0.000973805 |
| GUCY1A3   | 0.256165129  | 9.201590673 | 0.000974455 |
| RPAP1     | 0.11541229   | 6.788036297 | 0.000978621 |
| IRAK4     | -0.107491659 | 6.336855732 | 0.00097974  |
| POLR3A    | -0.099996363 | 7.605511022 | 0.000980107 |
| C3ORF70   | 0.138936576  | 7.078831566 | 0.000982933 |
| GPR160    | -0.088066623 | 6.140137569 | 0.00098313  |
| CCNE2     | 0.071454974  | 6.149352511 | 0.000985146 |
| BMP2K     | -0.063755415 | 6.538423716 | 0.000992754 |
| LDHB      | 0.201617079  | 12.70232893 | 0.000994991 |
| NDUFAF2   | -0.169855405 | 10.04675927 | 0.000996654 |
| PSMC4     | -0.197568318 | 8.192467976 | 0.000996672 |
| AQR       | -0.099144261 | 6.946942248 | 0.000998312 |
| EIF3EIP   | 0.26822837   | 10.91211923 | 0.001000523 |
| SCG5      | 0.130543937  | 6.327369177 | 0.001000771 |
| PMS2L1    | 0.056941927  | 6.354628791 | 0.001006293 |
| MAN1A2    | 0.070789319  | 6.573998355 | 0.001008083 |
| CUGBP1    | -0.121347273 | 6.828529489 | 0.00100926  |
| NUSAP1    | 0.126355151  | 6.443760534 | 0.001015315 |
| LOC389033 | -0.097629276 | 6.307048662 | 0.001015672 |
| VIM       | -0.248432641 | 11.65299602 | 0.00101633  |
| PRNP      | 0.16325948   | 11.71800383 | 0.001016989 |
| PXT1      | -0.074521873 | 6.030179965 | 0.001018134 |
| KIAA0367  | 0.288212294  | 6.615745285 | 0.001018265 |
| NBEA      | 0.22103698   | 7.877729198 | 0.00101848  |
| C21ORF128 | -0.12118413  | 6.496328189 | 0.001018487 |
| PPP1R3B   | 0.133708334  | 6.516452435 | 0.001019499 |
| ICAM3     | -0.19863783  | 8.640491325 | 0.001022711 |
| RAN       | -0.197712353 | 8.494485455 | 0.001023818 |
| HYOU1     | -0.205915318 | 7.670612907 | 0.001025516 |
| PPP3CB    | 0.154530446  | 10.14739624 | 0.001029004 |
| GGA1      | -0.18378926  | 11.8654527  | 0.001031165 |
| KIAA1211  | 0.052348643  | 6.128498506 | 0.001031599 |
| HFM1      | 0.061188245  | 6.166248768 | 0.001032366 |
| RTN3      | 0.156527812  | 7.787313225 | 0.001032989 |
| PCDH17    | 0.346988688  | 8.198838312 | 0.00103952  |
| MGC3207   | 0.178679355  | 8.018775554 | 0.00103994  |
| DCTN2     | -0.116977654 | 11.2251892  | 0.001043327 |
| KLK11     | -0.073471627 | 6.142885194 | 0.001044877 |
| LOC653602 | -0.118441443 | 6.177703447 | 0.001045391 |
| TNK2      | -0.139183546 | 7.285091904 | 0.001046289 |
| NUAK1     | 0.189307082  | 10.31105838 | 0.001046941 |

## DEG.infomation

|           |              |             |             |
|-----------|--------------|-------------|-------------|
| SEZ6L     | 0.098336437  | 5.974793084 | 0.001046973 |
| ANKRD12   | 0.15377284   | 8.390778974 | 0.001048189 |
| SNHG11    | 0.109251615  | 7.130828109 | 0.001048478 |
| MRPL16    | 0.252003243  | 8.570190638 | 0.00105058  |
| C14ORF172 | -0.142994434 | 6.549045636 | 0.001051534 |
| FLJ44124  | -0.252803707 | 10.8159505  | 0.001053883 |
| TMEM38A   | 0.171750781  | 6.930659911 | 0.001056375 |
| SFRS12    | 0.155381273  | 7.805413393 | 0.00105802  |
| PDGFB     | -0.095887808 | 6.701765101 | 0.0010591   |
| SHCBP1    | -0.180343427 | 11.56057087 | 0.00105994  |
| PALM      | -0.176775188 | 7.789914136 | 0.001060115 |
| TROVE2    | 0.098359794  | 8.682651799 | 0.001061216 |
| TP73L     | 0.128355072  | 6.17991219  | 0.001063001 |
| PRDM11    | -0.081676397 | 6.042960662 | 0.001063031 |
| CACHD1    | -0.079579073 | 6.359797981 | 0.00106342  |
| USP9X     | 0.112932921  | 8.437412625 | 0.001064612 |
| ZNF649    | 0.105245469  | 6.909544774 | 0.001069203 |
| LOC283683 | 0.179664751  | 7.117065799 | 0.001069456 |
| EDA       | -0.04517612  | 6.165292798 | 0.001071211 |
| C9ORF30   | -0.199971614 | 7.903679754 | 0.001072026 |
| FAIM      | 0.064979538  | 6.208432639 | 0.001074157 |
| TP53RK    | -0.142353147 | 7.163075501 | 0.001076008 |
| ETFA      | 0.215307165  | 11.97547416 | 0.001077337 |
| FLNA      | -0.150103941 | 6.280215008 | 0.001078351 |
| ZNF85     | 0.120183168  | 6.05146579  | 0.001079039 |
| ITGAV     | 0.17088748   | 10.60657091 | 0.001079608 |
| FTHL7     | -0.167013875 | 12.56410338 | 0.001080036 |
| SEMA6C    | 0.2300517    | 7.655349592 | 0.001080053 |
| PTPRN2    | 0.083294203  | 6.362323272 | 0.001080681 |
| ZNF518B   | -0.159534503 | 8.273618702 | 0.00108387  |
| ZSWIM4    | -0.12022577  | 7.027238836 | 0.001084336 |
| TMF1      | 0.092505464  | 6.744941957 | 0.001084969 |
| RN7SL1    | -0.155806746 | 14.29050442 | 0.001085076 |
| OSBPL7    | 0.093689026  | 6.822356792 | 0.001087008 |
| CD34      | -0.19006182  | 8.926006877 | 0.001087119 |
| TRAPPC6B  | 0.143123251  | 7.364060676 | 0.001090003 |
| RALY      | -0.162375489 | 9.424613547 | 0.001091245 |
| TBC1D19   | 0.117710855  | 7.102084769 | 0.001093199 |
| CHRNA5    | -0.228612739 | 9.565613032 | 0.001094822 |
| MPPED2    | 0.159020705  | 6.565582066 | 0.001095198 |
| RPL12     | -0.185263488 | 11.8076169  | 0.001100646 |
| SEMA4C    | -0.128235914 | 6.286933804 | 0.001100895 |
| RABGGTA   | -0.089657986 | 6.490096151 | 0.001104351 |
| VASP      | -0.156944318 | 6.336877227 | 0.001105597 |
| PTGS2     | -0.136705126 | 6.463664008 | 0.001106228 |
| SNORD100  | -0.089157368 | 6.222092952 | 0.001108043 |
| MBD6      | -0.158243447 | 8.492714569 | 0.001108053 |
| KIAA1553  | -0.063642277 | 6.12007964  | 0.001111006 |
| ZNF165    | 0.081843245  | 6.433650693 | 0.001114311 |
| GGPS1     | 0.101660226  | 8.231312965 | 0.001115582 |
| MGC33556  | -0.109090371 | 5.922324278 | 0.00112198  |

## DEG.infomation

|           |              |             |             |
|-----------|--------------|-------------|-------------|
| NRCAM     | -0.103447087 | 6.00391128  | 0.00112269  |
| XTP3TPA   | -0.166275652 | 8.801624683 | 0.001122697 |
| MTIF2     | 0.178151066  | 9.148568678 | 0.001125883 |
| IL1RAP    | -0.122252277 | 6.427506183 | 0.001126571 |
| ARHGEF11  | 0.068312338  | 6.721802776 | 0.001127079 |
| MAP1S     | -0.136060929 | 7.307855701 | 0.001127476 |
| PACSIN1   | 0.285025002  | 8.114315392 | 0.001134429 |
| CSE1L     | -0.114818055 | 8.731770255 | 0.001137658 |
| EVI2A     | -0.07141115  | 6.216392138 | 0.001144193 |
| ZNF772    | 0.119777065  | 7.173671681 | 0.001148557 |
| C12ORF5   | -0.149820259 | 7.083138413 | 0.00114964  |
| HOOK2     | 0.188735831  | 8.962502062 | 0.001152413 |
| RGS10     | -0.139169351 | 6.852372996 | 0.001157977 |
| LRRN4CL   | -0.13803762  | 6.37837876  | 0.001158093 |
| PLA2G5    | -0.184205073 | 8.270715108 | 0.00116081  |
| IQCC      | 0.137107899  | 6.560423568 | 0.001161881 |
| LOC134466 | 0.103744591  | 6.117533518 | 0.001162183 |
| PRPF18    | 0.143045901  | 7.594362204 | 0.001162247 |
| SPECC1L   | 0.166560559  | 10.32788911 | 0.001163382 |
| HEBP1     | 0.175003749  | 9.411531295 | 0.001168901 |
| OPLAH     | -0.205435947 | 8.910885557 | 0.001169368 |
| HIST1H1C  | -0.275258146 | 10.27814261 | 0.001170863 |
| BZW1      | -0.056458487 | 6.187507561 | 0.0011742   |
| ZNF91     | 0.287367615  | 9.815224865 | 0.001178369 |
| A2BP1     | -0.157313556 | 6.932652955 | 0.001180007 |
| BCAP31    | -0.196914569 | 9.953383721 | 0.001181209 |
| TRIP4     | 0.10964873   | 7.781755388 | 0.001186131 |
| LOC653717 | -0.149187201 | 6.57036891  | 0.001186152 |
| ABRA      | -0.325423052 | 6.97631744  | 0.001188113 |
| LOC731366 | 0.080389576  | 6.192092544 | 0.001192232 |
| SERINC1   | 0.179847047  | 9.499204183 | 0.001192312 |
| LOC648570 | -0.068196291 | 6.008594276 | 0.001192552 |
| CASK      | -0.092116452 | 6.813019197 | 0.001195279 |
| CHCHD4    | 0.17982889   | 9.988551191 | 0.001201069 |
| CUEDC1    | -0.188348035 | 9.916362604 | 0.001201452 |
| CAPNS1    | -0.134852527 | 10.78911235 | 0.001204722 |
| DYNLT1    | 0.209016545  | 10.12324815 | 0.001204879 |
| LOC653583 | 0.127505424  | 6.562344654 | 0.001205573 |
| SLC16A7   | 0.168051291  | 6.997609231 | 0.001209668 |
| C1ORF54   | 0.254481912  | 9.402363697 | 0.001210511 |
| TINP1     | 0.178949981  | 10.41931239 | 0.001211068 |
| SNTB2     | -0.139808566 | 7.458045053 | 0.00121297  |
| TSPAN3    | -0.162357526 | 9.368159569 | 0.001213912 |
| FKTN      | -0.192883083 | 11.48632909 | 0.001213959 |
| SUPT4H1   | 0.129191629  | 8.93798326  | 0.001220364 |
| UBQLN4    | -0.152631567 | 9.230670939 | 0.00122065  |
| FAT3      | 0.117571089  | 6.238750153 | 0.001221973 |
| SLC30A5   | 0.108633217  | 7.964775359 | 0.001224512 |
| GJC1      | -0.185600004 | 11.95739757 | 0.001226163 |
| WDR43     | -0.161641941 | 6.663243324 | 0.001226897 |
| ASPH      | 0.199794598  | 7.340017194 | 0.001228841 |

## DEG.infomation

|           |              |             |             |
|-----------|--------------|-------------|-------------|
| PTH2      | 0.1192436    | 6.246210407 | 0.001230672 |
| APOL1     | -0.076881649 | 6.177074411 | 0.001230775 |
| LAG3      | -0.087951287 | 6.228869869 | 0.00123666  |
| C17ORF39  | 0.078763267  | 7.523082248 | 0.001245974 |
| CTDSPL2   | 0.07676514   | 6.786585196 | 0.00124641  |
| PHYHD1    | -0.132160536 | 6.573774955 | 0.001247583 |
| C1ORF53   | 0.225134537  | 8.605091489 | 0.001248841 |
| C4ORF42   | 0.089714828  | 6.28952252  | 0.001250222 |
| GPR180    | -0.145541048 | 6.85219149  | 0.001250298 |
| MYO1D     | 0.229295962  | 7.112782796 | 0.001250924 |
| CCDC14    | 0.126180681  | 8.13907749  | 0.001251037 |
| C20ORF7   | 0.156794731  | 8.662614414 | 0.001252187 |
| TAOK1     | 0.263304096  | 7.562518332 | 0.001252988 |
| LOC646574 | 0.108739379  | 6.341080643 | 0.00125836  |
| CDV3      | -0.223533069 | 9.016569734 | 0.00126032  |
| DACT2     | 0.164389929  | 6.373117804 | 0.001260676 |
| TSG101    | 0.115672324  | 10.37726744 | 0.00126087  |
| FAM83B    | -0.078901996 | 6.039818395 | 0.001263135 |
| TM2D1     | 0.166531701  | 9.757369101 | 0.001269517 |
| TM4SF1    | -0.198121449 | 12.02058061 | 0.001270813 |
| LOC652837 | 0.183204667  | 6.562655316 | 0.001274383 |
| PPM1J     | 0.110890945  | 6.529216794 | 0.001274725 |
| VSIG2     | -0.088558379 | 6.387628147 | 0.001274955 |
| LOC651143 | -0.136079124 | 6.93078918  | 0.001275446 |
| RNF5      | -0.11008188  | 7.74935465  | 0.001281919 |
| ETFB      | -0.181501997 | 11.15016505 | 0.001286849 |
| C14ORF108 | 0.124105184  | 8.523202768 | 0.00128877  |
| ACACB     | -0.269950151 | 10.12939619 | 0.001290051 |
| STOML1    | -0.133698324 | 7.558492328 | 0.00129134  |
| ASCC3     | 0.119156197  | 7.107744265 | 0.00129292  |
| CD320     | -0.148288659 | 7.937095016 | 0.001294679 |
| SLC19A2   | -0.099536288 | 6.563114008 | 0.001299008 |
| SNORD56   | -0.090610895 | 6.424490784 | 0.001299216 |
| NCOA3     | -0.116208195 | 8.202575676 | 0.001300224 |
| VEGFB     | 0.160121987  | 10.64486421 | 0.001300467 |
| ADH1B     | -0.278010956 | 6.868448621 | 0.0013015   |
| RARS2     | 0.14908719   | 8.585940629 | 0.001305438 |
| GLTPD1    | -0.186502182 | 7.774496405 | 0.00131061  |
| ZNF767    | 0.112751727  | 7.315550886 | 0.001311915 |
| HIST1H2BK | -0.206274637 | 8.958028411 | 0.001312234 |
| EGF       | 0.102249196  | 6.517656062 | 0.001315194 |
| PARD3     | -0.116734944 | 6.31464569  | 0.001316444 |
| C9ORF80   | -0.196300173 | 11.37465554 | 0.001320329 |
| FOXD2     | 0.096863967  | 6.166624692 | 0.001321159 |
| PRRG1     | -0.160961661 | 7.950832009 | 0.00132274  |
| SIGLECP3  | 0.081673908  | 6.155683767 | 0.001323129 |
| ITLN1     | -0.376097315 | 6.621436936 | 0.001325494 |
| PDE1B     | -0.085746388 | 6.164338331 | 0.001329524 |
| FAM109B   | -0.127256586 | 6.58540465  | 0.001330782 |
| FCHO2     | 0.180799721  | 7.193422485 | 0.001334244 |
| LOC727849 | 0.061630894  | 6.121161357 | 0.001339783 |

## DEG.infomation

|               |              |             |             |
|---------------|--------------|-------------|-------------|
| ZNF658        | 0.127022501  | 6.427308257 | 0.001343669 |
| LOC644544     | -0.091103084 | 6.079493015 | 0.00134607  |
| DKFZP586H2123 | 0.255331418  | 7.604763926 | 0.001346383 |
| BEAN          | -0.062650025 | 6.053920077 | 0.001352757 |
| ACTR8         | 0.12290878   | 7.024683396 | 0.001353075 |
| MRPL44        | 0.138243157  | 7.76603808  | 0.001354413 |
| C8ORF33       | -0.105122614 | 8.68092134  | 0.00135475  |
| DNAJB9        | -0.205976287 | 9.542579289 | 0.00135595  |
| ISG20L2       | -0.166138983 | 7.419839477 | 0.001361211 |
| MT1H          | -0.096228089 | 6.080423312 | 0.00136476  |
| SH2B2         | -0.08612949  | 6.049020616 | 0.001364891 |
| TAF4          | 0.154106998  | 8.146779732 | 0.001366267 |
| LOC130773     | 0.134110577  | 7.256323898 | 0.001366732 |
| MED10         | -0.177404563 | 9.136137753 | 0.001367872 |
| TRAFD1        | -0.242548744 | 7.901614086 | 0.00136826  |
| SNORD35B      | -0.10485545  | 6.293280901 | 0.001372151 |
| OLFM4         | 0.108568435  | 6.248953041 | 0.001373606 |
| RABEP1        | 0.18627831   | 9.250023086 | 0.00137573  |
| APOO          | 0.191199321  | 9.333120374 | 0.001376199 |
| FXYD2         | -0.045602698 | 6.100510268 | 0.001376339 |
| C1ORF19       | 0.143832323  | 9.246193234 | 0.001376707 |
| KIAA1542      | -0.133116953 | 6.115398619 | 0.00138131  |
| ANGPTL2       | 0.302927777  | 9.832598268 | 0.001383811 |
| EFNB2         | 0.256033084  | 9.287637202 | 0.001384955 |
| MS4A2         | -0.094527393 | 6.193862173 | 0.001389744 |
| HLA-DPA1      | -0.287132438 | 9.823149048 | 0.001394662 |
| ZNF362        | 0.164318132  | 9.03296107  | 0.001396093 |
| DLL1          | -0.267819586 | 7.873340754 | 0.001396752 |
| MCM5          | -0.124676755 | 7.050574714 | 0.001397707 |
| LOC653489     | -0.215833524 | 8.662195139 | 0.001398661 |
| LOC401317     | 0.285514548  | 7.105945931 | 0.00139902  |
| CYB5D1        | 0.159748085  | 8.551652481 | 0.001400913 |
| GAS2L1        | -0.055387272 | 6.378701521 | 0.001403232 |
| LOC651064     | 0.155981193  | 10.25203288 | 0.001405393 |
| ZNF397        | 0.089269554  | 6.435986001 | 0.001408183 |
| COPS6         | -0.118283818 | 8.54565592  | 0.001414204 |
| CDRT1         | -0.053208809 | 6.110063623 | 0.001416373 |
| LOC642947     | -0.186374534 | 11.89634484 | 0.001417395 |
| GLT8D3        | 0.089352573  | 7.093135171 | 0.001418357 |
| C3ORF59       | 0.133352618  | 7.569228244 | 0.001422889 |
| INDO          | -0.380965836 | 6.445561268 | 0.0014239   |
| C19ORF43      | -0.225008762 | 9.058188199 | 0.001424094 |
| PCGF5         | 0.15911832   | 6.94293213  | 0.00142632  |
| FIG4          | 0.102844182  | 7.599510542 | 0.001427297 |
| QTRTD1        | -0.093805338 | 6.458068418 | 0.00142953  |
| CTDP1         | -0.06654     | 6.580933567 | 0.001430416 |
| COL13A1       | 0.131730292  | 6.565506493 | 0.00143329  |
| DYNLRB1       | 0.108138075  | 9.93568218  | 0.001435428 |
| LOC648059     | -0.12653458  | 6.803696523 | 0.001435796 |
| ZNF431        | -0.092673576 | 6.423305686 | 0.00143819  |
| JRKL          | 0.081252286  | 6.37864154  | 0.001440208 |

## DEG.infomation

|            |              |             |             |
|------------|--------------|-------------|-------------|
| ZNF747     | 0.095103785  | 6.361974615 | 0.001440262 |
| CHRNA3     | 0.093007607  | 6.41849296  | 0.001447435 |
| LOC286297  | -0.117364095 | 6.572779538 | 0.001450025 |
| ZFYVE1     | 0.072584287  | 6.557197202 | 0.001450487 |
| C17ORF71   | 0.158742418  | 7.057920407 | 0.001451204 |
| MTRF1      | 0.117489523  | 6.804976375 | 0.001455452 |
| LOC645888  | 0.093344513  | 6.361708538 | 0.0014562   |
| SMAD7      | 0.126513609  | 6.945938406 | 0.001458689 |
| ST6GALNAC6 | 0.199703395  | 8.340363715 | 0.001460219 |
| HIST1H3D   | 0.098245231  | 6.465746116 | 0.001461699 |
| REC8       | 0.099887341  | 6.726348538 | 0.00146464  |
| CCDC117    | 0.114553566  | 7.417813168 | 0.001466244 |
| LOC651790  | 0.078713731  | 6.101938478 | 0.001469637 |
| GSTT2      | 0.23978597   | 6.916624026 | 0.001470638 |
| FBXW7      | 0.15545844   | 8.122841529 | 0.001471626 |
| AYP1P1     | 0.162464957  | 8.40008984  | 0.001472237 |
| PTGDR      | 0.075006406  | 6.218189121 | 0.001473117 |
| LCN1       | 0.116025307  | 6.247406976 | 0.001475646 |
| ARHGEF1    | -0.094133543 | 6.295159959 | 0.00147754  |
| IDH1       | -0.157882331 | 7.964555813 | 0.001478063 |
| WHSC2      | 0.150713802  | 6.574566603 | 0.001479873 |
| MXD4       | -0.188410998 | 10.29485511 | 0.001486272 |
| LOC441196  | -0.077706543 | 5.98287625  | 0.001488113 |
| KIAA0355   | -0.161154116 | 9.700763029 | 0.001490085 |
| YIPF6      | -0.125487224 | 9.046804378 | 0.001495051 |
| CLTB       | -0.156984899 | 10.76563838 | 0.001495137 |
| MRPL4      | -0.102832243 | 7.018023208 | 0.001502503 |
| SOD1       | 0.154903415  | 12.9525343  | 0.001504086 |
| DEFA1      | -0.094977945 | 6.052807732 | 0.001506108 |
| MAX        | -0.069463164 | 6.731608582 | 0.001506841 |
| BRWD1      | 0.092114069  | 7.397203794 | 0.001507523 |
| MYRIP      | 0.053953635  | 6.164909658 | 0.001508144 |
| SH2B3      | -0.161312691 | 9.516920065 | 0.001510075 |
| PODXL2     | 0.106569465  | 6.472246862 | 0.001510768 |
| RNF135     | -0.065960166 | 6.567725602 | 0.001514201 |
| C11ORF42   | -0.084365231 | 6.028444207 | 0.001514308 |
| IFRD2      | -0.189966537 | 7.694956246 | 0.001515314 |
| COQ7       | 0.138534854  | 7.588914374 | 0.001515337 |
| SLC25A15   | -0.084504212 | 6.736491606 | 0.001516621 |
| HYPK       | -0.215595205 | 10.00642272 | 0.001522015 |
| WDR68      | -0.103007295 | 8.578418565 | 0.001522097 |
| MCL1       | -0.180912833 | 8.366324342 | 0.001525371 |
| FLYWCH1    | 0.120762953  | 6.726062927 | 0.001529778 |
| LHFP       | 0.169038125  | 9.581078198 | 0.001531511 |
| LTC4S      | 0.139468939  | 6.710468524 | 0.001534155 |
| GLTP       | -0.147900643 | 10.44180315 | 0.001534403 |
| ARMC10     | 0.153656664  | 8.288621684 | 0.001537666 |
| SIGLEC9    | -0.083246666 | 6.110568755 | 0.001538429 |
| SEC23IP    | -0.106055468 | 7.470837923 | 0.001538863 |
| TMEM87A    | -0.171403434 | 10.91441415 | 0.001541711 |
| C4ORF36    | 0.086219849  | 6.234768506 | 0.001550336 |



## DEG.infomation

|           |              |             |             |
|-----------|--------------|-------------|-------------|
| SCARF2    | -0.096418713 | 6.301467554 | 0.001552113 |
| CREB3L2   | -0.15116327  | 9.088252773 | 0.00155497  |
| LOC441775 | -0.195887382 | 11.84713345 | 0.001557902 |
| DCBLD1    | -0.091884138 | 6.557422375 | 0.001561507 |
| SOHLH2    | 0.090505219  | 6.206879281 | 0.00156239  |
| RAMP2     | 0.153806237  | 7.650971701 | 0.001564853 |
| MGAT4B    | 0.137780994  | 7.622801503 | 0.001565764 |
| SEMA3E    | -0.244833891 | 9.292180649 | 0.001568478 |
| PBLD      | 0.052239354  | 6.209240256 | 0.001572571 |
| SLC25A14  | 0.119321673  | 7.148284322 | 0.001578592 |
| CYP26B1   | 0.194710516  | 6.860034562 | 0.001579854 |
| PPP1R3F   | -0.141428759 | 9.038743209 | 0.001583289 |
| SAA1      | -0.089525211 | 6.15754866  | 0.00158371  |
| LOC652672 | -0.151148498 | 7.72599545  | 0.00158601  |
| PRKD1     | 0.12271719   | 6.878470802 | 0.001588692 |
| C8ORFK36  | 0.061181885  | 6.110186033 | 0.001590474 |
| UQCC      | -0.160577515 | 9.156583131 | 0.001593981 |
| SIGLEC1   | -0.077960198 | 6.084161158 | 0.001595402 |
| C19ORF28  | -0.12062071  | 6.292765754 | 0.001603182 |
| RAB34     | -0.153924441 | 7.37575117  | 0.001604133 |
| SCARA3    | 0.095148362  | 6.358013922 | 0.001604775 |
| CKM       | -0.154988628 | 14.33693673 | 0.001616368 |
| RNF215    | 0.125905563  | 6.39680748  | 0.001616683 |
| ZNF823    | 0.103762033  | 7.078625655 | 0.001616738 |
| FAM101B   | -0.086712686 | 6.42736784  | 0.001618772 |
| HIST1H3H  | 0.075465265  | 6.111147466 | 0.001620716 |
| LOC645098 | 0.085424032  | 6.126629611 | 0.001621375 |
| SUPT6H    | 0.130130184  | 7.166062726 | 0.001621701 |
| ZNF283    | 0.100717298  | 6.493117947 | 0.001621854 |
| ERH       | 0.220950701  | 9.271910775 | 0.001621949 |
| IFT57     | 0.122894398  | 7.378205385 | 0.001622686 |
| RBM3      | -0.132995277 | 6.612643851 | 0.001624454 |
| RPP21     | -0.137049062 | 10.17037546 | 0.001624805 |
| EEF1G     | -0.257181225 | 11.66790296 | 0.00162555  |
| FEM1B     | -0.104017377 | 6.658609525 | 0.001630072 |
| NLRC5     | -0.093048646 | 6.42097747  | 0.001631317 |
| COG4      | 0.135473999  | 7.544347811 | 0.001632044 |
| LOC653650 | 0.074679272  | 6.260401451 | 0.00163731  |
| VIPR1     | -0.171711681 | 7.296747714 | 0.001638196 |
| KIAA0999  | -0.146517385 | 8.54869667  | 0.001640884 |
| SLC19A1   | -0.105440467 | 6.185854326 | 0.001643361 |
| CREBZF    | 0.159509962  | 6.938076184 | 0.001648269 |
| FLJ45248  | -0.109989896 | 6.238807706 | 0.001652371 |
| STARD3    | -0.140865429 | 6.406349773 | 0.001654739 |
| ZNF443    | 0.084758325  | 6.539759727 | 0.001657806 |
| NY-SAR-48 | 0.062103638  | 6.570973085 | 0.001663964 |
| C15ORF38  | 0.108149504  | 7.18235985  | 0.001672312 |
| ZBTB3     | 0.186227942  | 6.96513085  | 0.001672984 |
| CCDC74A   | 0.083685453  | 6.22010177  | 0.001674893 |
| TM9SF2    | -0.176831296 | 9.726416422 | 0.00167561  |
| C21ORF24  | -0.196303266 | 11.68625455 | 0.001680386 |

## DEG.infomation

|           |              |             |             |
|-----------|--------------|-------------|-------------|
| PILRB     | 0.124365217  | 6.740626965 | 0.00168258  |
| CNTNAP3B  | -0.057617671 | 6.098636269 | 0.001683419 |
| VENTX     | -0.10864249  | 6.785358279 | 0.001685871 |
| CAD       | -0.10556473  | 6.463203146 | 0.001690197 |
| SIX5      | 0.167045858  | 8.790084168 | 0.001693568 |
| PLAT      | 0.246778761  | 7.271542149 | 0.001693659 |
| C12ORF60  | 0.13212333   | 6.781009876 | 0.001695369 |
| ZNF134    | 0.106269021  | 7.178075059 | 0.001696642 |
| FMNL2     | -0.094041318 | 6.379721124 | 0.001699879 |
| SEPT2     | 0.147546393  | 10.51305747 | 0.001706789 |
| PURB      | -0.14311102  | 9.311274467 | 0.001716079 |
| BCR       | -0.050695805 | 6.313742918 | 0.001717525 |
| NFIA      | 0.160184051  | 9.089631397 | 0.001724161 |
| TBC1D5    | -0.09931151  | 6.232844462 | 0.001730293 |
| SFRP5     | -0.085449223 | 5.9774072   | 0.001735069 |
| BRCA1     | 0.074363807  | 6.400345306 | 0.001735094 |
| LRRC48    | 0.047055911  | 6.158637833 | 0.001735144 |
| C9ORF66   | 0.108709477  | 6.657047083 | 0.001735624 |
| ACP6      | 0.172706469  | 7.230836717 | 0.001738009 |
| LOC148137 | -0.085064979 | 6.263523944 | 0.001739405 |
| LOC730994 | 0.138015105  | 7.230151141 | 0.001741127 |
| NUDT13    | 0.101280718  | 6.635453449 | 0.001742047 |
| TCP11L1   | 0.088115483  | 6.533523555 | 0.001747884 |
| OR4D1     | 0.104857792  | 6.189237358 | 0.00175054  |
| POP7      | -0.142806632 | 8.044764623 | 0.001750593 |
| NOD1      | -0.129281616 | 7.169250399 | 0.001755419 |
| LOC197350 | 0.109075867  | 6.320150524 | 0.001756456 |
| PKN3      | -0.133025948 | 6.779975945 | 0.001760563 |
| FREQ      | -0.221092375 | 6.951866893 | 0.001762098 |
| BAT3      | 0.127275488  | 8.704971945 | 0.001770604 |
| PEPD      | -0.133189521 | 9.25554139  | 0.001775697 |
| NEIL2     | 0.176050444  | 8.045248382 | 0.001776428 |
| TMEM132A  | -0.107562629 | 6.488775335 | 0.001780022 |
| PAFAH1B2  | 0.110782     | 6.661144563 | 0.001781069 |
| OGG1      | -0.076926855 | 6.541545506 | 0.001782989 |
| TNFAIP8   | -0.112953422 | 6.344719218 | 0.001783396 |
| ATP13A5   | -0.113351568 | 5.930345314 | 0.001789694 |
| C17ORF69  | 0.12140672   | 6.591797096 | 0.001793751 |
| GPR65     | -0.08121671  | 6.303693354 | 0.001797748 |
| GPR84     | -0.083391314 | 6.171123795 | 0.00179998  |
| LOC643287 | -0.290357453 | 7.943193187 | 0.001800993 |
| LHX2      | -0.089492597 | 6.007391028 | 0.001802892 |
| FAM26F    | -0.098259481 | 6.437274251 | 0.001805848 |
| KL        | -0.116155275 | 6.64565601  | 0.001806105 |
| TPRKB     | -0.166097868 | 7.549266721 | 0.001806935 |
| LOC729196 | -0.076231666 | 6.071087161 | 0.001808829 |
| TBCB      | 0.220209614  | 9.687818557 | 0.00180906  |
| MGC3032   | 0.07255543   | 6.584725052 | 0.001809113 |
| HHAT      | 0.104601672  | 6.128482301 | 0.001810842 |
| AIFM1     | 0.184587947  | 9.32541964  | 0.001817134 |
| HGD       | 0.068595583  | 6.161392018 | 0.001818849 |

## DEG.infomation

|            |              |             |             |
|------------|--------------|-------------|-------------|
| MR1        | -0.119429927 | 6.374258489 | 0.001823114 |
| PSMG2      | 0.150522924  | 9.755724366 | 0.001826566 |
| SLC38A1    | -0.227564929 | 8.845955399 | 0.001827778 |
| RAB9B      | 0.240824994  | 8.945455967 | 0.001832337 |
| WNT5B      | -0.074896938 | 6.352505454 | 0.001833849 |
| LOC205251  | 0.237255158  | 9.99058324  | 0.001835239 |
| LOC375190  | -0.098460076 | 6.197267257 | 0.001835845 |
| LOC401623  | 0.101457813  | 6.238451708 | 0.00183814  |
| TM9SF3     | -0.224086574 | 7.91725001  | 0.001838894 |
| PDK2       | 0.149189582  | 7.892257487 | 0.00183901  |
| FAM8A1     | 0.136672006  | 7.513508758 | 0.001841142 |
| RETN       | -0.150305547 | 6.00430833  | 0.001842158 |
| ZNF628     | -0.076435327 | 6.122605464 | 0.001842802 |
| FAM113A    | -0.119995903 | 6.814335595 | 0.001843052 |
| IQCA1      | 0.083060059  | 6.184407969 | 0.001846529 |
| LPXN       | 0.124002295  | 8.197999012 | 0.001849564 |
| CXXC6      | 0.082895328  | 6.132216714 | 0.001853039 |
| GAL3ST3    | 0.105612646  | 6.360611319 | 0.001853226 |
| CIB1       | -0.155106146 | 11.60738272 | 0.001854478 |
| C14ORF142  | 0.18098894   | 8.205636655 | 0.001855624 |
| SIRPA      | -0.192369605 | 8.947417249 | 0.001857512 |
| EARS2      | 0.157088344  | 7.517975938 | 0.001857703 |
| CCL26      | -0.138511656 | 6.299843549 | 0.001859446 |
| KLHDC5     | 0.183311688  | 8.044229918 | 0.001868113 |
| ZNF652     | -0.185699006 | 9.763394396 | 0.001873946 |
| MGC16703   | -0.157665175 | 12.93912702 | 0.001879104 |
| ZNF367     | 0.080533883  | 6.143798151 | 0.001880006 |
| GSK3A      | 0.103564462  | 6.67719405  | 0.001886003 |
| CCS        | -0.105185239 | 7.301177786 | 0.001890529 |
| VWA1       | -0.101600881 | 6.519954644 | 0.001892581 |
| PRPF4B     | 0.069905925  | 6.61185902  | 0.001897701 |
| C2ORF24    | 0.148324756  | 8.108693748 | 0.00190636  |
| RAB1A      | -0.124729479 | 8.519302535 | 0.001906803 |
| C12ORF43   | -0.096566681 | 6.993534058 | 0.001914001 |
| ZDHHC17    | 0.133156855  | 7.988285466 | 0.001918847 |
| TP53BP2    | -0.139991414 | 7.538578364 | 0.001920048 |
| LOC727726  | 0.083176841  | 6.824553716 | 0.001920493 |
| P2RXL1     | -0.082519048 | 6.035286832 | 0.001922997 |
| MRS2       | 0.1702504    | 7.642676304 | 0.001923239 |
| RPL27      | -0.140104162 | 13.10377199 | 0.001927487 |
| GCHFR      | -0.162825886 | 7.074217085 | 0.001930822 |
| THBD       | -0.167550228 | 6.302109802 | 0.001931401 |
| DJ222E13.2 | -0.08818372  | 6.147384869 | 0.001931865 |
| NGFR       | -0.15639812  | 6.102323448 | 0.00193435  |
| HSD17B8    | 0.215819667  | 8.540591331 | 0.001938825 |
| CHD5       | 0.084966348  | 6.126075471 | 0.001939373 |
| HOXA4      | -0.089888421 | 6.023187884 | 0.00194093  |
| C20ORF29   | -0.124584137 | 7.045489521 | 0.001945741 |
| SLC23A2    | -0.062274455 | 6.276768331 | 0.001950279 |
| LHCGR      | 0.125584916  | 6.158460772 | 0.001951746 |
| PID1       | -0.188726106 | 7.318463646 | 0.001953063 |

## DEG.infomation

|           |              |             |             |
|-----------|--------------|-------------|-------------|
| MALT1     | -0.106187425 | 6.827633759 | 0.001953464 |
| KLHDC1    | 0.058559977  | 6.128199887 | 0.001954561 |
| KRTAP20-2 | 0.084714548  | 6.380162734 | 0.001955113 |
| MIER1     | 0.092386561  | 7.536991125 | 0.001956447 |
| FAM71E1   | -0.096787551 | 6.602466791 | 0.00195936  |
| CHMP2B    | 0.163893375  | 8.553460136 | 0.001959411 |
| AMACR     | 0.123837595  | 6.665178733 | 0.001963358 |
| DUS1L     | -0.137469469 | 6.829330901 | 0.00196968  |
| PHTF1     | 0.170231206  | 7.195253022 | 0.00197073  |
| ADAM23    | -0.228350158 | 8.35238273  | 0.001978324 |
| USF2      | 0.159415964  | 8.374642462 | 0.001981906 |
| ARL5A     | 0.125525497  | 10.36952326 | 0.00198957  |
| LOC441246 | -0.177046069 | 12.68261547 | 0.001989571 |
| IL1RL2    | -0.085395631 | 6.07275742  | 0.001990151 |
| PLXNA1    | -0.151542801 | 7.754667639 | 0.0019921   |
| PLD2      | -0.111773879 | 6.4865538   | 0.002003686 |
| LOC653453 | -0.080521796 | 6.042534098 | 0.002003974 |
| CENPO     | -0.057580579 | 6.119579703 | 0.002013166 |
| LOC652844 | 0.097802883  | 6.17431392  | 0.002014009 |
| KCNS2     | -0.083583138 | 6.126731075 | 0.002015402 |
| ZNF436    | 0.132611617  | 6.480837952 | 0.002016463 |
| ITPA      | -0.157219728 | 7.355846855 | 0.002020493 |
| GABBR1    | 0.093295163  | 6.81364194  | 0.002023402 |
| ODZ3      | 0.174843718  | 7.064242604 | 0.002024053 |
| CA13      | -0.128467381 | 6.403834331 | 0.002025134 |
| LOC653513 | 0.389338091  | 9.607271951 | 0.002031921 |
| POL3S     | -0.080582616 | 6.123200398 | 0.002039717 |
| CCDC49    | -0.095569814 | 7.36660082  | 0.002042417 |
| C1ORF77   | 0.12098377   | 9.653047216 | 0.002043887 |
| PRAF2     | -0.105121247 | 6.581541182 | 0.002049583 |
| MND1      | -0.055623548 | 6.06085957  | 0.00205467  |
| C5ORF25   | 0.069069647  | 6.400657432 | 0.002061692 |
| LOC643224 | -0.06357265  | 6.317099062 | 0.002063469 |
| DFNB59    | 0.081246851  | 6.290586688 | 0.002069965 |
| WWP2      | 0.066466221  | 6.724473739 | 0.002072321 |
| NLRP8     | -0.280572082 | 10.21471767 | 0.002072521 |
| LANCL2    | 0.122161576  | 7.738579324 | 0.002073653 |
| SYNGAP1   | 0.086546212  | 6.247216734 | 0.00207822  |
| HSN2      | -0.077767022 | 6.155228502 | 0.00207838  |
| FLJ90757  | 0.109206955  | 6.660457716 | 0.002080096 |
| PPP2R3B   | 0.186232213  | 8.462807064 | 0.002081217 |
| CCDC81    | 0.087111636  | 6.123277872 | 0.002085153 |
| CASP9     | 0.09743975   | 7.098414932 | 0.002088362 |
| MBD3      | -0.145212563 | 7.377623266 | 0.002091052 |
| ATP10D    | 0.081890953  | 6.241272414 | 0.002092015 |
| PLAA      | -0.076518767 | 6.472466185 | 0.002094795 |
| NDN       | 0.20569081   | 10.86874738 | 0.002095687 |
| C3ORF17   | -0.088748786 | 6.824678915 | 0.00209791  |
| TXNDC16   | 0.097651231  | 6.277045958 | 0.002099879 |
| MOSC1     | 0.320520933  | 7.32081392  | 0.002101585 |
| KCNA7     | -0.11283017  | 6.052544451 | 0.002106706 |

## DEG.infomation

|           |              |             |             |
|-----------|--------------|-------------|-------------|
| GLB1      | -0.105656654 | 8.223286976 | 0.002109985 |
| DIP2A     | 0.055604834  | 6.573529755 | 0.002112908 |
| MAK10     | 0.087691445  | 6.929280261 | 0.002122237 |
| IHPK1     | -0.112888001 | 8.019259664 | 0.002123972 |
| TTC19     | -0.150459281 | 8.797626973 | 0.002126219 |
| GPX3      | -0.184371414 | 12.37530002 | 0.002127022 |
| NDUFA9    | 0.162413232  | 11.28955862 | 0.002128485 |
| XK        | -0.173707774 | 7.49317181  | 0.002132018 |
| SEPMS1    | 0.105299957  | 8.269804508 | 0.002132517 |
| LOC401093 | -0.179116066 | 7.145895984 | 0.002132533 |
| STRN      | 0.112778488  | 8.035837461 | 0.00213283  |
| ZNF599    | 0.059447944  | 6.127932878 | 0.002135055 |
| CDC42     | -0.130979849 | 7.052607374 | 0.002138284 |
| C9ORF78   | 0.113473968  | 10.09037393 | 0.002139488 |
| PPP1R15A  | 0.207796995  | 10.93643719 | 0.002140274 |
| FZD6      | 0.185022406  | 6.920298093 | 0.002142228 |
| MARCH2    | 0.127088422  | 8.083559656 | 0.002155849 |
| WDR47     | 0.118576882  | 7.018522429 | 0.002164246 |
| GUSBL2    | 0.116138742  | 7.000480851 | 0.002164287 |
| RPS19BP1  | -0.189009539 | 8.655524291 | 0.002164632 |
| DNAJC25   | -0.125026185 | 7.631146709 | 0.002170261 |
| AKIRIN1   | -0.167440423 | 8.117847537 | 0.002171514 |
| C9ORF150  | 0.110242283  | 6.314011038 | 0.002177145 |
| LOC344405 | 0.09931544   | 6.607779322 | 0.002177392 |
| PRMT7     | 0.169265865  | 6.956333473 | 0.002178624 |
| CIAO1     | 0.093835471  | 9.732274411 | 0.00218552  |
| GARNL4    | -0.196596173 | 7.800410205 | 0.002189152 |
| C2ORF42   | 0.14245829   | 7.678277562 | 0.002194022 |
| PCBP1     | -0.120783686 | 11.70815543 | 0.002194557 |
| XRN1      | 0.116123805  | 7.577518185 | 0.002200225 |
| SARM1     | 0.096374786  | 6.585129907 | 0.00220168  |
| TTC27     | 0.130771698  | 8.366558425 | 0.002211755 |
| MAL       | -0.254385277 | 7.529732994 | 0.002213193 |
| KIAA1324  | -0.09140361  | 6.028438657 | 0.002226618 |
| PTPRO     | -0.072668589 | 6.144500508 | 0.00222897  |
| NARF      | 0.150577137  | 8.785225772 | 0.002229989 |
| SF3B14    | 0.139662397  | 9.751005426 | 0.002233731 |
| CHD1      | -0.174885858 | 8.385200599 | 0.002236999 |
| PRKAG1    | -0.232259475 | 8.387831806 | 0.002238332 |
| RIMS3     | -0.091072295 | 6.6693562   | 0.002240251 |
| C8ORF37   | -0.198362859 | 10.67839821 | 0.00224527  |
| LOC554206 | 0.094871749  | 6.639198581 | 0.002245503 |
| SLC39A10  | -0.174244429 | 6.733386667 | 0.002247096 |
| C8ORF45   | -0.242144941 | 9.551033415 | 0.002248771 |
| SPIN4     | 0.124975429  | 6.625092677 | 0.002250399 |
| UROS      | 0.174526822  | 11.22190118 | 0.002251179 |
| FHDC1     | -0.070056965 | 6.18396744  | 0.002253269 |
| ARHGAP23  | -0.15361708  | 8.170077518 | 0.002256397 |
| C19ORF23  | -0.108516274 | 6.366423264 | 0.002263208 |
| PCDHB2    | -0.127850964 | 6.659429521 | 0.00227626  |
| PHF17     | -0.080946287 | 7.137738664 | 0.002284962 |

## DEG.infomation

|            |              |             |             |
|------------|--------------|-------------|-------------|
| GALIG      | 0.170176194  | 7.087734537 | 0.002288591 |
| RNF141     | 0.192065412  | 7.183259681 | 0.002297903 |
| NICN1      | 0.180131319  | 9.445388285 | 0.002304738 |
| MYH4       | -0.115541359 | 6.392191806 | 0.002305671 |
| TMEM209    | 0.119527193  | 7.749798175 | 0.002313521 |
| ACTN4      | -0.174237211 | 8.474977165 | 0.002317782 |
| FVT1       | -0.146347558 | 8.775828633 | 0.002325667 |
| IL411      | -0.06005179  | 6.030807009 | 0.002328385 |
| LOC646195  | -0.117409857 | 13.87689598 | 0.002329837 |
| CAMK1      | -0.134613318 | 7.149506343 | 0.002329923 |
| PON2       | 0.126116778  | 9.468414505 | 0.002334883 |
| KRTAP10-12 | -0.071191746 | 5.929974397 | 0.002336931 |
| APOL6      | -0.079840316 | 6.05671669  | 0.00234231  |
| KCNIP1     | 0.056240518  | 6.05441666  | 0.002344566 |
| DHX36      | 0.099832085  | 7.875535879 | 0.002344728 |
| LOC652388  | -0.164346539 | 7.0173569   | 0.002349157 |
| MOSC2      | 0.218140525  | 7.679603838 | 0.002350236 |
| MRPS25     | 0.188530927  | 8.670476779 | 0.002356782 |
| ITIH4      | 0.086078934  | 6.169052947 | 0.002356982 |
| CLDN9      | 0.059418366  | 6.299601183 | 0.002359823 |
| PGBD2      | -0.077711126 | 6.166158169 | 0.002362419 |
| MYO3B      | -0.132785582 | 6.792968616 | 0.002366748 |
| DPM2       | -0.086401993 | 6.709184654 | 0.002367686 |
| XRCC4      | -0.120182768 | 6.100005554 | 0.002369393 |
| C14ORF80   | -0.092128312 | 6.735757294 | 0.002375866 |
| GNAI3      | -0.139889016 | 7.027204841 | 0.002376659 |
| SPTLC1     | -0.202216664 | 9.224591762 | 0.002380706 |
| MGC72080   | 0.174140467  | 7.449244862 | 0.002382245 |
| LOC728358  | -0.054878715 | 6.016363259 | 0.002387757 |
| RNF122     | -0.165831887 | 6.482904199 | 0.002398516 |
| SP140      | -0.053973247 | 6.04621291  | 0.002398706 |
| SPATA20    | 0.276695074  | 9.693153586 | 0.002401915 |
| SELI       | -0.125839425 | 6.893426669 | 0.002402918 |
| GNAT1      | -0.062891369 | 6.385516667 | 0.002404731 |
| SPHK2      | -0.135045888 | 8.492047625 | 0.002410265 |
| DJ341D10.1 | -0.123147163 | 6.891818465 | 0.002411285 |
| JMY        | 0.091534306  | 6.441918448 | 0.002412148 |
| MAL2       | -0.111346897 | 6.151691563 | 0.002414342 |
| GPI        | 0.174667643  | 10.7950864  | 0.002418661 |
| ZDHHC12    | -0.123109124 | 6.640803325 | 0.0024187   |
| ANGPT2     | -0.375772831 | 7.248215019 | 0.002418871 |
| MTMR3      | 0.101173257  | 7.430549563 | 0.002421317 |
| VBP1       | 0.121891003  | 10.31810621 | 0.002434951 |
| SIAH1      | 0.095501741  | 8.354428645 | 0.002445021 |
| RPL18      | -0.14693086  | 13.26648256 | 0.002458912 |
| AADAACL1   | -0.198834249 | 8.785461451 | 0.002462019 |
| IKBKB      | -0.111600268 | 6.790428061 | 0.002470679 |
| ZW10       | -0.130969257 | 8.442831583 | 0.002475312 |
| C14ORF32   | -0.168494858 | 8.915863575 | 0.002478668 |
| TTC25      | 0.089479317  | 6.425240851 | 0.002482396 |
| XRCC6BP1   | 0.228393906  | 7.26536036  | 0.002488952 |

## DEG.infomation

|           |              |             |             |
|-----------|--------------|-------------|-------------|
| RNASE3    | -0.095350809 | 5.899140765 | 0.002489847 |
| ISYNA1    | -0.141004739 | 7.267134618 | 0.00249111  |
| GLT8D1    | 0.10434923   | 6.732719854 | 0.002497365 |
| RAB11A    | -0.1492313   | 10.63432165 | 0.002499095 |
| HIPK1     | -0.041329973 | 6.005076052 | 0.002499704 |
| ZNF720    | 0.088728226  | 6.209174376 | 0.002507967 |
| UNC5B     | 0.104271226  | 6.577246929 | 0.002510548 |
| RUSC1     | -0.139736801 | 9.102765534 | 0.002510619 |
| BRSK1     | 0.184756726  | 7.548731987 | 0.002517322 |
| TGFB2     | 0.176108896  | 6.473699774 | 0.00251811  |
| TBC1D20   | 0.097935743  | 7.452359711 | 0.002519473 |
| LOC730820 | 0.130548647  | 7.358174432 | 0.002521307 |
| CHM       | 0.105472189  | 7.458485921 | 0.002523472 |
| TYRO3     | -0.128455809 | 6.625489827 | 0.002524229 |
| LGI2      | -0.166359191 | 6.461699482 | 0.002524347 |
| ORAI1     | -0.12889065  | 6.654969938 | 0.002525917 |
| NQO2      | -0.320547605 | 7.902594859 | 0.002544303 |
| CDH15     | -0.078320719 | 6.16549724  | 0.002547468 |
| ZNF276    | -0.094154777 | 6.215298079 | 0.002564265 |
| KIAA1641  | 0.065064595  | 6.304659608 | 0.002571655 |
| APOBEC3C  | 0.090738019  | 6.511706995 | 0.002573139 |
| GBP1      | -0.253858687 | 7.110096732 | 0.002580466 |
| DPH3      | -0.155757589 | 7.38672736  | 0.002586845 |
| LOC441061 | -0.139898685 | 6.372276143 | 0.002590097 |
| MRPL21    | 0.16661537   | 9.76893259  | 0.002591733 |
| FLJ36644  | 0.078158211  | 6.33503857  | 0.002601197 |
| NFKB1     | -0.132962379 | 10.24118514 | 0.002621042 |
| RMND5B    | 0.107562337  | 7.518661916 | 0.002621474 |
| TCEB2     | 0.122833898  | 11.18178861 | 0.002633047 |
| AP3B1     | -0.13869103  | 9.575649034 | 0.002636172 |
| DOK3      | -0.076224571 | 5.979370455 | 0.002655018 |
| TRIM3     | -0.061429972 | 6.433051109 | 0.002656947 |
| TRIM61    | 0.106502625  | 6.534917401 | 0.002658222 |
| SMC2      | 0.149646294  | 7.192364498 | 0.002665705 |
| ZNF394    | -0.19409561  | 9.541138428 | 0.002667027 |
| PAPOLA    | -0.221831075 | 10.04553443 | 0.002667033 |
| LOC731007 | 0.162120558  | 7.351547477 | 0.002682581 |
| BAG4      | 0.104040983  | 6.519851508 | 0.002687217 |
| LOC643396 | -0.10353278  | 6.286771286 | 0.002691707 |
| LOC643872 | 0.075903501  | 6.068739822 | 0.00269588  |
| LOC645688 | -0.172735725 | 9.926965202 | 0.002704106 |
| LRP4      | -0.126667412 | 6.699425996 | 0.002704671 |
| H2AFY2    | 0.142342469  | 9.418453599 | 0.002706584 |
| FRK       | 0.135166322  | 6.558307119 | 0.00271179  |
| PRICKLE4  | 0.15391021   | 10.37753443 | 0.002715488 |
| LOC647195 | -0.088521869 | 6.322117219 | 0.002722833 |
| LOC146517 | -0.156887401 | 8.240737393 | 0.002724453 |
| LOC158301 | -0.13423204  | 6.926568109 | 0.002726813 |
| PBXIP1    | 0.104493292  | 6.592182433 | 0.002727534 |
| SLC25A45  | 0.054273265  | 6.157847557 | 0.002727542 |
| SEC11A    | -0.123571307 | 10.57409532 | 0.002727885 |

## DEG.infomation

|           |              |             |             |
|-----------|--------------|-------------|-------------|
| TMEM33    | -0.112234409 | 6.67734043  | 0.00273835  |
| TDRD1     | -0.172826936 | 8.472225739 | 0.002743573 |
| ACTR10    | 0.135598976  | 9.591149371 | 0.002744706 |
| EXOSC4    | -0.170945443 | 7.626771158 | 0.002745549 |
| RTCD1     | 0.154358664  | 8.914604007 | 0.002750365 |
| TTC30B    | 0.088097185  | 6.199793475 | 0.002751465 |
| FZD3      | 0.093387558  | 6.479624976 | 0.00275148  |
| LOC731002 | 0.09746223   | 6.138317331 | 0.002752903 |
| ZNF589    | 0.087295109  | 6.557911657 | 0.002754876 |
| ELOVL1    | -0.154985779 | 6.81207164  | 0.002755937 |
| MRPL19    | 0.230672046  | 7.684770438 | 0.002766968 |
| GARNL1    | 0.109105614  | 8.110635216 | 0.002770897 |
| C20ORF52  | 0.175951734  | 11.87790923 | 0.00277395  |
| LOC646276 | -0.100227095 | 6.196996001 | 0.00278541  |
| GNG7      | 0.236280836  | 9.117210692 | 0.002786262 |
| ITK       | -0.095320629 | 6.414314972 | 0.002790533 |
| USP14     | -0.101356538 | 7.756637514 | 0.002794201 |
| C1ORF144  | -0.145536906 | 9.774479974 | 0.002809715 |
| POLR2B    | 0.173073846  | 8.815592703 | 0.002818668 |
| TSFM      | 0.146259999  | 7.622761281 | 0.002831517 |
| CYFIP2    | 0.175417979  | 8.01096162  | 0.00283373  |
| FLJ14107  | -0.078472907 | 5.996833736 | 0.002833859 |
| FAM119B   | -0.100334193 | 6.865620443 | 0.002836001 |
| FADS2     | -0.106449583 | 6.145959429 | 0.002836099 |
| LOC731835 | 0.080745063  | 6.445932013 | 0.002839516 |
| FAM49B    | -0.16584234  | 6.867014519 | 0.002847145 |
| LOC650831 | -0.063246035 | 5.999041555 | 0.002847886 |
| PLS1      | 0.07151498   | 6.376746167 | 0.002854943 |
| ZNF558    | 0.091826109  | 6.944278352 | 0.002859398 |
| DPY19L3   | -0.092404728 | 6.158985452 | 0.002859648 |
| NONO      | -0.110487787 | 9.698434772 | 0.002861103 |
| CYC1      | -0.137453407 | 12.89398424 | 0.002861982 |
| LOC649801 | 0.213728084  | 6.504803513 | 0.002865023 |
| FRS3      | 0.175268409  | 8.195190739 | 0.002866976 |
| LOC652881 | 0.129542047  | 6.481861163 | 0.002867156 |
| DKC1      | -0.16614772  | 9.394540377 | 0.002868221 |
| LOC732371 | -0.089710778 | 6.160075786 | 0.00287181  |
| GNA12     | -0.092907211 | 7.254674098 | 0.002871958 |
| CORO2A    | -0.051273127 | 6.047674284 | 0.002876383 |
| OCIAD1    | -0.148254635 | 10.93922512 | 0.002886199 |
| DENR      | -0.132988616 | 9.160864756 | 0.002890553 |
| ZNF217    | -0.125322549 | 7.049371009 | 0.002900235 |
| SPRED1    | -0.209320113 | 9.063046992 | 0.002906343 |
| KIAA0753  | 0.098893871  | 6.477804037 | 0.002910158 |
| SBDSP     | 0.205762932  | 9.078292421 | 0.002912465 |
| MGC39584  | -0.068250943 | 5.910997746 | 0.002913918 |
| SPAG1     | 0.051954154  | 6.323374259 | 0.002926993 |
| LPAR1     | -0.168342297 | 7.43441823  | 0.002937147 |
| KIAA1671  | 0.152115249  | 8.100607257 | 0.00293817  |
| CSAD      | 0.119305887  | 7.179111206 | 0.002939663 |
| ZEB2      | 0.152093587  | 8.284571672 | 0.002945072 |



## DEG.infomation

|           |              |             |             |
|-----------|--------------|-------------|-------------|
| SCNN1D    | -0.136974142 | 6.960399385 | 0.002948524 |
| LARS2     | 0.117892177  | 7.395121226 | 0.002951281 |
| CD84      | -0.085799281 | 6.212122553 | 0.002952928 |
| LOC387762 | -0.096488012 | 6.196611709 | 0.002957162 |
| UQCRC2    | 0.198853211  | 10.57680076 | 0.002958907 |
| HOXB5     | -0.085511128 | 6.276281593 | 0.002961518 |
| TMED4     | 0.167569078  | 9.242799422 | 0.002963107 |
| FAM98A    | 0.167973856  | 10.06726074 | 0.002966067 |
| DDX11     | -0.043571152 | 6.159601644 | 0.002968196 |
| APM-1     | 0.110204639  | 6.462877653 | 0.002969468 |
| ELOVL2    | -0.113777248 | 6.354669559 | 0.002971183 |
| TEX264    | -0.13537983  | 7.615168731 | 0.002971629 |
| PREP      | 0.119545553  | 8.390002967 | 0.002980555 |
| GPD1      | -0.093967608 | 6.156761079 | 0.002983027 |
| PABPC1    | -0.168018408 | 9.705870328 | 0.002984173 |
| DAPK1     | -0.105705641 | 6.384081748 | 0.002987262 |
| PMS2L3    | 0.101797627  | 6.425012371 | 0.002988972 |
| GK        | -0.110282524 | 6.991325132 | 0.002999996 |
| ATAD3B    | -0.08200412  | 6.230139299 | 0.003003482 |
| PIGH      | -0.155134394 | 7.3333066   | 0.003006801 |
| CHL1      | -0.064639312 | 6.119652514 | 0.003025325 |
| MDH1      | 0.126525477  | 14.10641055 | 0.003026297 |
| SSH2      | -0.121355404 | 8.587544411 | 0.003026603 |
| LOC729759 | 0.071784587  | 6.107964452 | 0.003026802 |
| SIGLEC7   | -0.052020274 | 6.15938269  | 0.003028278 |
| ZFAND2A   | -0.242349803 | 8.097319415 | 0.003046948 |
| SDHA      | 0.231425962  | 11.66482596 | 0.003047222 |
| ZNF596    | 0.055511746  | 6.044520299 | 0.00305012  |
| RHOD      | -0.192383611 | 8.594592941 | 0.003050847 |
| SCGB1D2   | -0.19290694  | 6.372988818 | 0.003051752 |
| LOC642859 | -0.056180183 | 6.046604531 | 0.00307026  |
| RNF144    | -0.166860177 | 8.501399028 | 0.003076307 |
| PEX11G    | 0.144502276  | 6.272092637 | 0.003078075 |
| IKZF5     | 0.132920245  | 6.977098455 | 0.003080398 |
| DYM       | -0.101531207 | 8.879502634 | 0.003083439 |
| PPM1B     | 0.108246143  | 7.878335413 | 0.003086368 |
| LOC730051 | 0.16049175   | 7.441682951 | 0.003098992 |
| CREB3L4   | 0.084046183  | 6.080881261 | 0.003110014 |
| HDHD2     | 0.232615581  | 8.289914441 | 0.003114104 |
| TUG1      | 0.134210001  | 10.87371845 | 0.003121551 |
| TNFSF8    | -0.078969183 | 6.194591736 | 0.003122128 |
| FAM10A4   | 0.123727776  | 8.51616727  | 0.003123893 |
| CNTN4     | 0.054312502  | 6.102750231 | 0.003128167 |
| FAM168A   | -0.073523706 | 6.076946936 | 0.00313229  |
| HPS5      | 0.093684797  | 7.168462193 | 0.003144819 |
| INMT      | 0.247615573  | 8.979512486 | 0.003145232 |
| TCF7L2    | 0.097642601  | 6.384304088 | 0.003152795 |
| C18ORF26  | 0.086462408  | 6.228209043 | 0.003156504 |
| LOC728888 | -0.162547898 | 10.82952253 | 0.003166148 |
| ABCG5     | 0.088003704  | 6.60139095  | 0.003171149 |
| GLI3      | -0.085029861 | 6.449401384 | 0.003171313 |

## DEG.infomation

|           |              |             |             |
|-----------|--------------|-------------|-------------|
| LOC152195 | 0.091377302  | 6.48406254  | 0.003172088 |
| KCNQ3     | -0.100372864 | 6.661849001 | 0.003181117 |
| CCDC47    | -0.112860029 | 6.473132714 | 0.003182916 |
| HIVEP2    | -0.120791846 | 7.664699956 | 0.003187283 |
| CALN1     | -0.073746598 | 6.870448735 | 0.003187499 |
| BTNL2     | -0.083701619 | 6.270085237 | 0.003188198 |
| ZNFX1     | -0.157589878 | 8.500388718 | 0.003191312 |
| NAV1      | 0.225701925  | 8.467772555 | 0.003204362 |
| C10ORF41  | -0.080569013 | 6.278566224 | 0.003206142 |
| SEN2      | 0.103766509  | 7.998709409 | 0.003207839 |
| XYLT1     | -0.159122268 | 6.244607603 | 0.003210902 |
| COL4A3    | -0.084785519 | 6.379934086 | 0.003214284 |
| SLC1A4    | -0.140273544 | 6.892457806 | 0.003215982 |
| CACNA2D1  | 0.064265855  | 6.160824382 | 0.003227034 |
| HDHD1A    | 0.163661921  | 8.590828918 | 0.003229463 |
| SPIN2B    | 0.064270184  | 6.275241413 | 0.003235804 |
| C1ORF58   | 0.086862583  | 6.159552141 | 0.003238227 |
| MIB1      | 0.084152283  | 6.487747169 | 0.003253894 |
| GIYD1     | -0.101114561 | 6.862093059 | 0.003255559 |
| PUM2      | 0.128709199  | 9.283871073 | 0.003264404 |
| COMMD9    | 0.134147131  | 8.028963885 | 0.00326734  |
| ALS2CR12  | 0.117894096  | 6.069180495 | 0.003268868 |
| LOC440731 | -0.086566924 | 6.632665485 | 0.003289596 |
| LOC493754 | 0.101663219  | 6.620405542 | 0.003289599 |
| PHF11     | -0.118622765 | 9.133018888 | 0.00329237  |
| WTAP      | -0.089049292 | 7.304108616 | 0.003293898 |
| ECHS1     | 0.171055954  | 11.4190208  | 0.003299174 |
| ECHDC1    | 0.183583104  | 7.080489385 | 0.003307545 |
| ABCA1     | 0.243220896  | 9.011111864 | 0.003307663 |
| SLC26A6   | -0.086382869 | 6.693422301 | 0.003308912 |
| RHAG      | -0.068335426 | 6.070060941 | 0.003309531 |
| UGP2      | -0.174326995 | 10.0713678  | 0.00331613  |
| MGC4677   | -0.344684277 | 8.421226258 | 0.00331768  |
| TIE1      | -0.119777999 | 7.146211079 | 0.003318187 |
| MAP1LC3A  | -0.171203332 | 9.495450136 | 0.003320884 |
| ELP3      | 0.0923223    | 9.003731603 | 0.003326152 |
| LOC644137 | -0.070799012 | 6.002708062 | 0.003331484 |
| ARID1A    | -0.132597395 | 8.577034668 | 0.003351053 |
| KIAA1715  | -0.114867434 | 7.332367865 | 0.003355823 |
| RABGEF1   | 0.088902975  | 7.120937563 | 0.003358148 |
| LOC441191 | 0.103061871  | 6.550374952 | 0.003369841 |
| AIFM2     | 0.108679348  | 6.673172289 | 0.003370316 |
| TNNC1     | 0.148154285  | 14.49325852 | 0.003376363 |
| CCDC23    | 0.168292428  | 9.349708558 | 0.003378034 |
| DISC1     | -0.041330304 | 6.077034705 | 0.003378702 |
| ZNF593    | -0.212553537 | 8.829667803 | 0.003381276 |
| NRK       | 0.125861382  | 6.713092465 | 0.003382774 |
| ACTG2     | -0.446862615 | 7.715219919 | 0.003384714 |
| MEOX1     | 0.196053544  | 7.658718783 | 0.003394081 |
| WRNIP1    | 0.157251001  | 9.01988966  | 0.003396587 |
| POT1      | 0.070468236  | 6.310728385 | 0.003405463 |

## DEG.infomation

|           |              |             |             |
|-----------|--------------|-------------|-------------|
| COL22A1   | 0.130552208  | 6.224525902 | 0.003408502 |
| CDCA7L    | 0.203270108  | 7.199979458 | 0.0034096   |
| RNPS1     | -0.139578313 | 9.007108032 | 0.003414611 |
| LOC732075 | 0.108452867  | 6.525872672 | 0.003420983 |
| FAM21C    | 0.052139722  | 6.350304856 | 0.003441861 |
| TNS1      | -0.166228306 | 8.523400072 | 0.003449124 |
| CCDC48    | 0.149882356  | 6.181130851 | 0.003452724 |
| CXORF34   | -0.088355524 | 6.757815718 | 0.003458655 |
| LOC728723 | 0.078274618  | 6.126232263 | 0.003464441 |
| GPR68     | -0.155255749 | 6.352787624 | 0.003474149 |
| CDKN1C    | -0.192194554 | 7.923822424 | 0.003478801 |
| RABAC1    | -0.208529915 | 9.347175599 | 0.003482488 |
| VAMP3     | 0.143457633  | 9.939593249 | 0.003510556 |
| BUD31     | 0.194752267  | 9.529759943 | 0.00351343  |
| RSAD1     | 0.151198276  | 7.636168968 | 0.003520746 |
| GPKOW     | -0.143247314 | 7.652527738 | 0.003525244 |
| MT1JP     | -0.071505008 | 6.176918759 | 0.00352525  |
| FLJ30092  | -0.050998015 | 6.157849397 | 0.003529865 |
| LRRC6     | 0.120384323  | 6.323718783 | 0.003544779 |
| ZNF57     | -0.142346633 | 6.623414084 | 0.00354507  |
| LOC645241 | 0.073079212  | 6.143351678 | 0.003545434 |
| DNAJC9    | 0.10756826   | 8.59467147  | 0.003569515 |
| HCN2      | 0.073602225  | 6.167898711 | 0.003580979 |
| ERBB2IP   | 0.061696946  | 6.413434495 | 0.00358503  |
| KIAA1333  | 0.086703998  | 6.233114517 | 0.003585219 |
| ANGPTL5   | 0.172989417  | 6.54804785  | 0.003586326 |
| RPL36A    | -0.098748061 | 6.372412661 | 0.003587677 |
| AFG3L1    | -0.046753075 | 6.376313988 | 0.003587817 |
| SEPT7     | 0.2807981    | 7.978412929 | 0.003590391 |
| NHLRC2    | -0.132655603 | 7.260306836 | 0.003601823 |
| C3ORF26   | -0.151366882 | 8.706447358 | 0.003608919 |
| CABLES2   | -0.132788129 | 6.950924766 | 0.003609994 |
| RNF19A    | 0.092761524  | 7.708502356 | 0.003612813 |
| PHKG2     | -0.111347411 | 6.758900789 | 0.003618497 |
| CRYAB     | -0.151184099 | 14.51487924 | 0.003620143 |
| KIF17     | -0.079935761 | 6.416535094 | 0.003621622 |
| RAVER1    | -0.10440197  | 7.143744243 | 0.003623827 |
| LOC652242 | 0.072219039  | 5.95385333  | 0.003624763 |
| CCR7      | -0.085491762 | 6.088613504 | 0.003625702 |
| SCAMP5    | 0.091297731  | 6.544087445 | 0.00363515  |
| C13ORF7   | 0.172799239  | 7.159093765 | 0.003636964 |
| SYN2      | -0.081641281 | 6.279669148 | 0.003638461 |
| LOC646588 | 0.093949857  | 6.180536223 | 0.003642793 |
| TMEM14A   | 0.147197886  | 7.796112213 | 0.003652802 |
| SEC16A    | -0.128414856 | 8.77794923  | 0.003655221 |
| IQCK      | 0.104614352  | 7.866864564 | 0.003655308 |
| MYST1     | 0.12058539   | 8.628691598 | 0.003655492 |
| MFSD2     | -0.081080977 | 5.995709286 | 0.003658258 |
| ITGA7     | -0.147911929 | 7.478823399 | 0.003664668 |
| ZC3H4     | 0.122687568  | 8.737308554 | 0.003673208 |
| ZBTB38    | 0.16480653   | 6.811611493 | 0.003678356 |

## DEG.infomation

|            |              |             |             |
|------------|--------------|-------------|-------------|
| SPAG8      | 0.080980943  | 6.181990302 | 0.003681702 |
| PKD1L1     | 0.065783985  | 6.401485469 | 0.003702618 |
| TOX4       | 0.136719845  | 7.493214426 | 0.00370981  |
| DTNBP1     | -0.075253672 | 6.815702551 | 0.003720507 |
| RUNX2      | 0.055721263  | 6.086401203 | 0.003722413 |
| CDC42SE2   | -0.120115547 | 7.279269677 | 0.00372274  |
| CYTL1      | 0.133773422  | 6.122287172 | 0.003722744 |
| CTH        | 0.058111102  | 6.262062324 | 0.003726584 |
| STK39      | -0.191108074 | 9.579341152 | 0.00373258  |
| CD58       | -0.145431068 | 8.486290477 | 0.003742762 |
| SLC16A6    | -0.074802187 | 6.086559846 | 0.003744461 |
| MICALL1    | -0.102517442 | 6.484867502 | 0.003759928 |
| NARG1      | -0.121826246 | 7.409013897 | 0.003760022 |
| TSLP       | 0.056622477  | 6.226836295 | 0.003763747 |
| FMO2       | 0.273367335  | 9.135452085 | 0.003776109 |
| ATL2       | -0.111355391 | 7.247633682 | 0.003791816 |
| SLC9A5     | 0.109363829  | 6.078818495 | 0.003795671 |
| PTGIS      | -0.27803032  | 7.731812404 | 0.003819024 |
| B3GALT4    | 0.11615167   | 7.070661453 | 0.00382267  |
| LOC642443  | 0.170496029  | 6.46114585  | 0.003824252 |
| TST        | -0.163942447 | 11.28076178 | 0.003834432 |
| DGUOK      | -0.105813623 | 9.012823828 | 0.003837311 |
| C6ORF142   | 0.119971578  | 10.47694771 | 0.00384018  |
| KIAA1881   | -0.298382782 | 10.20720379 | 0.0038457   |
| PTP4A1     | -0.142374165 | 6.669199231 | 0.003848656 |
| FARSA      | -0.122550206 | 7.385866927 | 0.003850593 |
| CSGALNACT2 | -0.120772995 | 6.076825477 | 0.003852806 |
| MGC2752    | -0.093551695 | 6.571912649 | 0.00386036  |
| SMOX       | -0.054009637 | 6.356450079 | 0.003864582 |
| FGFR4      | -0.046225285 | 6.064729552 | 0.00387634  |
| SCRG1      | 0.285287124  | 7.238908292 | 0.003876745 |
| LOC647450  | -0.176962142 | 6.461927204 | 0.003883248 |
| PLEKHO2    | -0.155694613 | 6.791597097 | 0.003885738 |
| LOC642393  | -0.073575673 | 6.366575472 | 0.003904947 |
| NEUROG2    | 0.077505023  | 6.253805996 | 0.003910107 |
| EXTL2      | 0.095803472  | 7.349946462 | 0.003920382 |
| PCTK3      | 0.164956925  | 7.883934287 | 0.003922717 |
| LOC644511  | -0.180831341 | 10.76981712 | 0.00393662  |
| LOC651285  | -0.067478098 | 6.142042737 | 0.003937704 |
| PPTC7      | -0.231896953 | 8.854997987 | 0.003946152 |
| KPNB1      | -0.162559861 | 11.07290136 | 0.003959313 |
| LOC401218  | -0.10143831  | 7.348646993 | 0.003961337 |
| LOC647677  | 0.058136193  | 5.948913323 | 0.003967595 |
| KIAA0652   | 0.100235793  | 6.340305075 | 0.00398415  |
| LCP2       | -0.069253748 | 6.225901215 | 0.003988913 |
| XG         | 0.083689306  | 6.031691875 | 0.003990857 |
| RMND5A     | 0.100241334  | 6.390933802 | 0.003995981 |
| ATXN2      | 0.103305046  | 10.26332679 | 0.004000555 |
| DPP4       | 0.14006287   | 6.632437749 | 0.004039232 |
| NR3C1      | 0.065668137  | 6.612858025 | 0.004048558 |
| LOC642423  | 0.080596638  | 6.264644221 | 0.0040689   |

## DEG.infomation

|           |              |             |             |
|-----------|--------------|-------------|-------------|
| C16ORF13  | 0.110399241  | 7.841009249 | 0.004070617 |
| DNAJC2    | 0.097759952  | 6.215147601 | 0.004074219 |
| LOC641700 | -0.154323832 | 7.035775425 | 0.004076615 |
| CDAN1     | -0.179230136 | 10.57915008 | 0.004083659 |
| BLZF1     | -0.239525905 | 10.48943445 | 0.004092494 |
| TBX1      | -0.035182635 | 6.043253833 | 0.004102055 |
| MAPKAP1   | -0.109170093 | 7.823938854 | 0.004114818 |
| NR4A1     | -0.06603258  | 6.063874202 | 0.0041219   |
| ANKRD44   | -0.128680178 | 6.455647466 | 0.004128291 |
| C21ORF81  | 0.127190777  | 6.40383005  | 0.004131554 |
| SYTL4     | -0.106711853 | 6.819852941 | 0.004135135 |
| GNS       | -0.132322469 | 12.21746454 | 0.004136788 |
| RBKS      | -0.112459068 | 7.238466197 | 0.004137414 |
| CRMP1     | -0.067747696 | 6.445686351 | 0.004142166 |
| STARD5    | -0.077038833 | 6.194824165 | 0.004152261 |
| FLT1      | -0.106880607 | 6.06392364  | 0.00415696  |
| FLJ20699  | 0.144372889  | 8.189529096 | 0.004177802 |
| USP25     | 0.134559086  | 6.864827443 | 0.004178256 |
| LAMC3     | 0.144270187  | 6.409991413 | 0.004178267 |
| HSPB3     | -0.183328917 | 12.65227834 | 0.004179419 |
| ZNF614    | 0.09536701   | 7.607432616 | 0.004195311 |
| SELK      | -0.158039604 | 9.627290369 | 0.004201485 |
| CYP4V2    | 0.302026847  | 8.906498386 | 0.004211424 |
| NRGN      | -0.139392882 | 6.407345854 | 0.004212086 |
| ACBD3     | 0.140480233  | 9.023765328 | 0.004223859 |
| LOC644670 | -0.083477266 | 6.403624477 | 0.00423202  |
| PRKAR1A   | 0.190061189  | 11.09179949 | 0.004240371 |
| DEDD      | -0.082792977 | 7.381156434 | 0.004255249 |
| TBP       | 0.087813763  | 7.918093556 | 0.004273628 |
| RG9MTD3   | -0.065207466 | 6.408360161 | 0.004273628 |
| ZC3H7A    | 0.096858586  | 8.293719946 | 0.004278393 |
| LOC650128 | -0.140192474 | 7.133636073 | 0.004280427 |
| LOC646609 | -0.113825358 | 6.228247921 | 0.00428071  |
| ADPRHL2   | -0.189156117 | 7.232521188 | 0.004282369 |
| C9        | 0.065534915  | 5.974878902 | 0.004299397 |
| ZWILCH    | -0.073574511 | 6.51950801  | 0.004300365 |
| C20ORF72  | 0.138502147  | 8.76067596  | 0.004305936 |
| TSPAN5    | 0.160814008  | 6.913882826 | 0.004306116 |
| RUNDC1    | -0.109827366 | 7.966351272 | 0.00430678  |
| RAB37     | 0.039632658  | 6.197802097 | 0.004326589 |
| JMJD2A    | -0.101093944 | 6.154024777 | 0.004329087 |
| CNTROB    | 0.081562948  | 6.441511759 | 0.004329584 |
| HPDL      | -0.078299696 | 6.093923239 | 0.004330036 |
| MGC3731   | -0.142582984 | 9.150049537 | 0.0043415   |
| FLJ44112  | 0.076634666  | 5.97766166  | 0.004343316 |
| KIAA0746  | -0.123637453 | 6.904804394 | 0.004354261 |
| RFWD3     | -0.10863604  | 7.174416621 | 0.004362097 |
| PPARA     | 0.087353848  | 6.899966499 | 0.004368519 |
| TRIM25    | -0.118859706 | 7.142931028 | 0.004371835 |
| SLC22A15  | 0.129455148  | 7.204998554 | 0.004372676 |
| FAM110A   | -0.057883637 | 6.183037318 | 0.004373634 |

## DEG.infomation

|           |              |             |             |
|-----------|--------------|-------------|-------------|
| WRN       | -0.097571425 | 7.432232354 | 0.004375126 |
| DPYSL3    | 0.267546491  | 10.63508454 | 0.00437676  |
| LOC651337 | 0.088532552  | 6.154126697 | 0.00437769  |
| NADSYN1   | -0.111574329 | 7.449006604 | 0.004387326 |
| GPATCH2   | 0.095614912  | 6.792992929 | 0.004388139 |
| CENPQ     | 0.127294572  | 6.613486219 | 0.004389584 |
| CST6      | -0.064666044 | 6.062903209 | 0.004400595 |
| PLEKHM2   | -0.151907983 | 10.5581464  | 0.004403191 |
| HNRPK     | -0.151136575 | 9.176362673 | 0.004404338 |
| NUDT4P1   | -0.073492182 | 6.006841279 | 0.00440435  |
| GORASP1   | 0.127558329  | 8.482095665 | 0.00440983  |
| TMED2     | -0.206968272 | 9.255702968 | 0.004410915 |
| RNF111    | 0.109608227  | 6.214210108 | 0.004414543 |
| NCOA5     | -0.121687693 | 7.707080409 | 0.004418167 |
| USP16     | 0.106849936  | 8.722082313 | 0.004418566 |
| FGF13     | 0.053230915  | 6.080022898 | 0.004429039 |
| STX7      | 0.12181389   | 7.253159158 | 0.004433515 |
| NUDT12    | 0.083302626  | 6.179233571 | 0.004434043 |
| MAP7D3    | 0.109715736  | 6.685119723 | 0.004434792 |
| SUMO1P3   | 0.170891018  | 7.689214525 | 0.004437804 |
| BAPX1     | 0.091999102  | 6.05890517  | 0.004438227 |
| C1ORF156  | 0.098925842  | 6.198818674 | 0.004438282 |
| CTAGE5    | 0.051896007  | 6.195835838 | 0.004439127 |
| PSMA5     | -0.133820767 | 10.60181806 | 0.00443987  |
| NAGLU     | -0.134290936 | 7.00259955  | 0.00444126  |
| CRYGS     | 0.100763239  | 6.858560647 | 0.004445719 |
| C6ORF89   | -0.12934371  | 7.21028192  | 0.004447945 |
| TMPRSS13  | -0.076769958 | 6.075442895 | 0.00445211  |
| SERPINF2  | -0.077978823 | 6.105908835 | 0.004464433 |
| ACAT2     | -0.117297903 | 6.953012023 | 0.004465088 |
| NEU4      | -0.089263976 | 6.029355516 | 0.0044661   |
| CROCC     | 0.088920728  | 6.849112807 | 0.004485351 |
| C5ORF28   | -0.219910104 | 10.20664086 | 0.004497869 |
| DNASE1L3  | 0.173457034  | 6.548024155 | 0.004500732 |
| LOC651872 | 0.088391425  | 6.372284299 | 0.004509774 |
| TFEB      | 0.088890484  | 6.519773018 | 0.004510859 |
| ALDOC     | 0.267213692  | 12.10328602 | 0.004511815 |
| C13ORF25  | -0.087316768 | 6.282866501 | 0.004518982 |
| NOC4L     | -0.048312875 | 6.546651303 | 0.004522739 |
| FOXO1     | -0.108058793 | 8.748751878 | 0.004529733 |
| CSDA      | -0.173767088 | 13.33794771 | 0.004537966 |
| LOC653438 | -0.114337132 | 7.753253423 | 0.004539551 |
| LOC643310 | 0.145226123  | 9.803134529 | 0.004540916 |
| LOC730272 | -0.070244083 | 5.973720178 | 0.004544523 |
| ARRDC4    | -0.183841676 | 6.876414099 | 0.004548105 |
| TRAPPC6A  | 0.14714295   | 6.912697603 | 0.004567292 |
| DEFB122   | 0.066843433  | 6.060467309 | 0.004573003 |
| ARFGEF1   | 0.100515375  | 7.767500728 | 0.004599019 |
| FAM104A   | -0.144924112 | 8.749111838 | 0.004599542 |
| OSBPL1A   | 0.152653554  | 8.910818378 | 0.004608381 |
| MFSD8     | 0.090001503  | 7.079786498 | 0.004613323 |

## DEG.infomation

|           |              |             |             |
|-----------|--------------|-------------|-------------|
| TNRC6B    | 0.123885465  | 7.733733104 | 0.004613951 |
| CAPG      | -0.083251311 | 6.297746017 | 0.004620328 |
| LOC283050 | -0.080686468 | 6.004357648 | 0.004626065 |
| DGKI      | 0.088875171  | 6.114542261 | 0.004629018 |
| C20ORF59  | -0.083684764 | 6.037396875 | 0.004633262 |
| HDAC8     | -0.094433937 | 6.676541544 | 0.004633393 |
| LOC648852 | -0.263514164 | 9.258000493 | 0.004636665 |
| LOC153364 | 0.091149515  | 6.600023124 | 0.004647303 |
| RFX2      | -0.090202124 | 6.232697287 | 0.004651587 |
| PLIN      | -0.154779522 | 6.101367037 | 0.004655518 |
| CYB5R2    | -0.081485753 | 6.293600523 | 0.004656019 |
| OSBP      | 0.111207183  | 10.29995658 | 0.004656926 |
| LOC388654 | -0.244420547 | 11.77668985 | 0.004659692 |
| KCNGB     | -0.058108692 | 6.191306663 | 0.004663284 |
| LRRC40    | 0.085452391  | 6.598305463 | 0.004663768 |
| CCL7      | -0.091648217 | 5.953507247 | 0.004665692 |
| OPHN1     | -0.081835253 | 6.139768657 | 0.004666668 |
| PRPS1     | -0.111630712 | 8.842668368 | 0.004667762 |
| LMO4      | -0.176457023 | 9.584212733 | 0.004676895 |
| LOXL3     | -0.098280058 | 6.507924703 | 0.004679451 |
| ROCK2     | -0.139250678 | 12.95387209 | 0.004685669 |
| ZNF250    | 0.083418767  | 6.7769164   | 0.004692849 |
| NGFRAP1   | 0.240677789  | 9.999735358 | 0.004694481 |
| LOC645013 | -0.075648613 | 6.037270041 | 0.004703232 |
| ERP29     | -0.114062314 | 9.873979583 | 0.00470741  |
| EEF1D     | -0.14601844  | 9.942891887 | 0.004711177 |
| ING2      | -0.112314755 | 7.161077239 | 0.004714439 |
| HEMK1     | 0.076249377  | 6.498995129 | 0.00472622  |
| DMD       | 0.071893657  | 6.714477521 | 0.00472921  |
| EPB41L1   | 0.062789596  | 6.266904252 | 0.004735617 |
| CSNK1A1   | -0.129747851 | 7.948119653 | 0.004737617 |
| UFD1L     | 0.069682339  | 6.740575416 | 0.004742296 |
| NFX1      | 0.137569869  | 8.196161937 | 0.004745106 |
| LOC441763 | 0.383699225  | 10.55800299 | 0.004746477 |
| LOC642477 | 0.101649103  | 6.300370891 | 0.00476816  |
| TOP3B     | 0.137104868  | 8.030581909 | 0.004768411 |
| RPS21     | 0.146933878  | 9.764979345 | 0.00477243  |
| LOC652489 | 0.142033095  | 8.00667968  | 0.004773074 |
| GRIK2     | -0.050896665 | 6.123681856 | 0.004807306 |
| PPP1R12A  | 0.138781601  | 7.293140684 | 0.004807681 |
| C4ORF34   | 0.119777462  | 8.795231049 | 0.004812206 |
| C22ORF28  | -0.10683173  | 9.428788415 | 0.004814532 |
| FLJ10996  | 0.100974122  | 6.238267952 | 0.004816053 |
| ASB10     | 0.29764267   | 10.20499535 | 0.0048202   |
| SAP130    | 0.090570251  | 8.135588647 | 0.004820572 |
| AFAP1L2   | 0.097487116  | 7.00154365  | 0.004822799 |
| RRP7A     | -0.21599182  | 8.669467089 | 0.004831648 |
| PRRT1     | 0.083767104  | 6.404513219 | 0.004833355 |
| DNAJC28   | 0.051788826  | 6.186799432 | 0.004835585 |
| TM2D2     | -0.114966496 | 7.335778161 | 0.004840559 |
| PPP1R15B  | -0.081768143 | 6.19885227  | 0.0048518   |

## DEG.infomation

|           |              |             |             |
|-----------|--------------|-------------|-------------|
| PDCD2     | -0.131476757 | 8.474346332 | 0.004853298 |
| LOC649509 | 0.062404635  | 6.032827592 | 0.004853302 |
| ARMC1     | 0.140714223  | 8.736128428 | 0.004856685 |
| RMND1     | 0.09123781   | 7.153254073 | 0.004864394 |
| OLFML1    | 0.176999887  | 7.41181126  | 0.004876634 |
| TMTC4     | -0.058370701 | 6.427277162 | 0.004880912 |
| CSN1S2A   | 0.070545987  | 6.087116073 | 0.004887852 |
| SMPX      | 0.205894575  | 11.72019454 | 0.004890315 |
| C6ORF72   | 0.189868216  | 7.638930238 | 0.004895208 |
| CDC34     | -0.172209626 | 8.552737803 | 0.004900293 |
| ZNF768    | -0.179201983 | 6.477881633 | 0.004902731 |
| ACTR2     | -0.152933737 | 10.3027904  | 0.004907393 |
| MRPL34    | 0.230103982  | 10.35781882 | 0.004908978 |
| CXORF26   | -0.145152328 | 8.625567736 | 0.004918196 |
| IPPK      | -0.094087914 | 6.66369819  | 0.004923701 |
| RELL2     | -0.072140023 | 6.05415887  | 0.004925595 |
| UBE4A     | 0.174143895  | 8.887979317 | 0.00492945  |
| APT_X     | 0.08590521   | 7.714778918 | 0.004930643 |
| FAM116A   | 0.181163226  | 8.167260637 | 0.0049312   |
| AKR1B10   | -0.079026378 | 5.963756615 | 0.004936501 |
| LMTK3     | 0.142563332  | 6.716103266 | 0.004943326 |
| LOC646109 | -0.066334274 | 6.050332996 | 0.004946042 |
| MON2      | 0.081836799  | 7.730962852 | 0.004962738 |
| VTI1B     | 0.169751178  | 8.175689145 | 0.004967599 |
| DPYD      | -0.145272328 | 6.777347273 | 0.00496812  |
| TAPT1     | 0.109444534  | 7.669741065 | 0.004970711 |
| WDR77     | 0.114303571  | 7.583877464 | 0.004980113 |
| SNORD38A  | -0.091826762 | 6.112395433 | 0.004982928 |
| RNASEH2A  | -0.103489408 | 6.619241507 | 0.004998502 |
| FIGN      | 0.081059216  | 6.371086805 | 0.00500646  |
| RPS27     | -0.124481582 | 13.38782046 | 0.005010635 |
| KCNMB1    | 0.329236667  | 8.083733047 | 0.005010719 |
| KIF3C     | 0.097241903  | 6.227601297 | 0.005018688 |
| FBXO6     | -0.12410646  | 7.568898542 | 0.005021717 |
| EPM2AIP1  | 0.20121002   | 9.213097438 | 0.005043741 |
| AOF2      | -0.102474559 | 8.564957329 | 0.005063501 |
| CLEC12A   | -0.061699222 | 6.161415027 | 0.00508395  |
| ADAM22    | 0.04484164   | 5.97159861  | 0.005098713 |
| EIF4B     | 0.142541695  | 11.52793966 | 0.005116091 |
| HNRNPD    | -0.137198732 | 11.30353297 | 0.005119498 |
| TRAF3IP1  | 0.075536568  | 7.082567295 | 0.005133578 |
| CD82      | -0.095459783 | 7.08094554  | 0.005138762 |
| CLCNKB    | 0.082581612  | 6.317483098 | 0.005140719 |
| LOC652264 | -0.153849582 | 7.160932569 | 0.005153778 |
| NSFL1C    | 0.131190103  | 9.105762465 | 0.005154282 |
| ATP13A2   | -0.0992254   | 6.628270395 | 0.00515584  |
| ZNF501    | 0.078796807  | 6.116033648 | 0.005165351 |
| SSX4B     | 0.053577508  | 6.124466327 | 0.005178167 |
| ITM2C     | 0.147209781  | 8.374067442 | 0.005193091 |
| LOC730358 | 0.127774322  | 7.02848686  | 0.005200534 |
| UBQLN2    | 0.183507649  | 10.10252333 | 0.005229886 |



## DEG.infomation

|           |              |             |             |
|-----------|--------------|-------------|-------------|
| IFT74     | 0.176729002  | 7.802050434 | 0.005233544 |
| HNRNPH2   | -0.158771459 | 6.837798073 | 0.00523981  |
| C7ORF47   | -0.132583377 | 7.945451768 | 0.005250353 |
| LOC642816 | 0.043576077  | 6.03025885  | 0.005251559 |
| LOC650037 | -0.082395623 | 6.077155191 | 0.00525446  |
| KLHL2     | -0.154999987 | 7.128003604 | 0.005263319 |
| RBM14     | -0.139856525 | 9.415349216 | 0.0052726   |
| C8ORF32   | 0.162241632  | 8.4753033   | 0.005272739 |
| TAF1B     | -0.106761939 | 6.70828049  | 0.005274671 |
| KATNAL1   | 0.117471033  | 7.683422516 | 0.005279843 |
| TF        | -0.17961139  | 6.26642047  | 0.00528101  |
| NES       | 0.316822072  | 10.30710528 | 0.005288331 |
| HBZ       | -0.074861608 | 6.102461422 | 0.005297685 |
| BOC       | 0.09044602   | 6.203867007 | 0.00530016  |
| SLC25A17  | -0.087548009 | 6.498686846 | 0.005303424 |
| CSPG4LYP1 | 0.06629858   | 5.993143648 | 0.005320052 |
| OBFC1     | 0.142097012  | 9.331879522 | 0.005330419 |
| CLIC4     | -0.188488843 | 10.19175155 | 0.005337327 |
| RAD54B    | 0.05385686   | 6.15654144  | 0.005348507 |
| ELMOD2    | 0.113709449  | 7.028093089 | 0.005359532 |
| RNF5P1    | -0.173618132 | 8.97880171  | 0.005363171 |
| COL5A1    | -0.299852164 | 8.732012927 | 0.005365454 |
| RNF19B    | -0.116086788 | 6.642620814 | 0.005391744 |
| PSMC3     | -0.095685912 | 10.70814464 | 0.005413741 |
| GOLGB1    | 0.238636078  | 8.617503877 | 0.005416923 |
| C11ORF63  | -0.082892514 | 6.499195727 | 0.005419213 |
| TMEM194   | 0.08264479   | 6.483219236 | 0.005425369 |
| C1ORF96   | 0.070465774  | 6.168986295 | 0.005445329 |
| AKR1B1    | -0.177825634 | 11.22060472 | 0.005473124 |
| ANKRD24   | 0.080372923  | 6.19098824  | 0.005479921 |
| PDE4C     | -0.185820202 | 11.91050717 | 0.005505109 |
| P4HA1     | 0.160538549  | 7.946581928 | 0.005518594 |
| WBSCR17   | 0.105564136  | 6.784337249 | 0.005527346 |
| SEC22A    | -0.090455999 | 7.961527497 | 0.005533517 |
| CHX10     | -0.073756459 | 6.130424598 | 0.005537451 |
| LOC644029 | -0.136875938 | 11.66523911 | 0.005543646 |
| PGAM5     | -0.07823602  | 6.986878894 | 0.00554971  |
| SNORD43   | -0.065911856 | 5.947899967 | 0.005550339 |
| IMMP2L    | 0.12674432   | 7.893748926 | 0.005555861 |
| MCF2L2    | 0.05858143   | 6.242880759 | 0.005559688 |
| GAMT      | 0.17583637   | 9.359070138 | 0.005561539 |
| MYH3      | -0.081816275 | 6.237209612 | 0.005589073 |
| PGM3      | -0.130715128 | 6.944431893 | 0.005589537 |
| WDR18     | -0.219677802 | 9.209110841 | 0.005589959 |
| C3ORF55   | -0.072700696 | 6.007757186 | 0.00560152  |
| LOC388002 | 0.072044513  | 6.138298798 | 0.00560362  |
| TXNRD1    | -0.262400166 | 8.900556294 | 0.005609204 |
| C9ORF3    | 0.161196481  | 8.984288025 | 0.005611306 |
| N-PAC     | -0.146354995 | 8.447088992 | 0.005613616 |
| FLJ45337  | 0.082841728  | 6.655193856 | 0.00561627  |
| DAB2IP    | 0.062123563  | 6.35871643  | 0.005634871 |

## DEG.infomation

|             |              |             |             |
|-------------|--------------|-------------|-------------|
| ZNF479      | 0.076852997  | 5.983341683 | 0.005638077 |
| LDHD        | 0.189725337  | 7.859095392 | 0.005642414 |
| POMP        | -0.154997505 | 11.18038606 | 0.005645131 |
| TMEM143     | 0.216938052  | 9.000172507 | 0.005652861 |
| LRRC58      | -0.114372584 | 6.859287794 | 0.005661344 |
| OR1M1       | -0.064983865 | 6.027735921 | 0.0056654   |
| HOXA5       | -0.083063878 | 6.011987151 | 0.005667371 |
| YIPF7       | 0.08490933   | 6.237734979 | 0.005673383 |
| RELA        | -0.097440275 | 6.966404454 | 0.005675587 |
| PTPN2       | -0.070188438 | 6.351329095 | 0.005679349 |
| RASA1       | 0.093950467  | 7.868081405 | 0.005702994 |
| ARHGAP21    | 0.14241228   | 10.26512464 | 0.005704541 |
| FAM116B     | -0.116282524 | 7.057381106 | 0.005705612 |
| LOC407835   | -0.118643325 | 8.08024013  | 0.005731048 |
| LOC653119   | -0.099540078 | 6.222969735 | 0.005731134 |
| C6          | -0.673928539 | 9.401276545 | 0.005745495 |
| ENTPD4      | -0.143922775 | 7.395507934 | 0.005763231 |
| RFESD       | 0.086451271  | 7.050931462 | 0.005774944 |
| CHIC1       | 0.049395957  | 6.22534011  | 0.005775437 |
| TAS2R9      | 0.063460242  | 6.085648814 | 0.005778922 |
| PLEKHA1     | -0.13914943  | 9.552391209 | 0.005783791 |
| DZIP3       | 0.075053993  | 6.39754524  | 0.005785672 |
| SNRPE       | 0.056642188  | 6.175939274 | 0.005792725 |
| PITRM1      | 0.125723152  | 9.232324331 | 0.005795388 |
| PALM2-AKAP2 | 0.05199083   | 6.023817887 | 0.005795448 |
| USP7        | -0.18117677  | 7.536565883 | 0.005797137 |
| CCDC109A    | -0.102880203 | 7.134789916 | 0.005800123 |
| HSBP1       | -0.15127981  | 10.09430729 | 0.005804001 |
| TNCRNA      | -0.118266252 | 6.504332421 | 0.005805353 |
| CLOCK       | 0.14399167   | 7.645835584 | 0.005827151 |
| C17ORF81    | 0.062986794  | 7.180676839 | 0.005829551 |
| ALDH3A2     | 0.132640268  | 9.285157224 | 0.005829993 |
| SLC2A9      | -0.048837885 | 6.198198482 | 0.005831117 |
| UNC13B      | 0.113584726  | 6.870825141 | 0.00583148  |
| SLC35B1     | -0.134829078 | 10.36939353 | 0.00583421  |
| LOC387841   | -0.113592613 | 12.58743659 | 0.005836159 |
| NOC2L       | -0.117071249 | 6.569885059 | 0.005857754 |
| SNF1LK2     | -0.088548044 | 6.672692524 | 0.005859002 |
| CD48        | -0.117862348 | 6.340081875 | 0.005866569 |
| IGF2BP3     | 0.123802146  | 6.536350811 | 0.005876817 |
| TTC38       | 0.194499725  | 7.840668506 | 0.00587762  |
| DUSP18      | -0.100613593 | 6.69660249  | 0.005879378 |
| NFATC1      | 0.096435883  | 6.403046096 | 0.005880783 |
| FANCI       | -0.089153821 | 6.219834737 | 0.005883424 |
| HOXB4       | -0.076084709 | 6.135265904 | 0.005892901 |
| PXDN        | -0.317082963 | 7.884261925 | 0.005893404 |
| ZNF213      | -0.092686445 | 7.202364666 | 0.005898925 |
| FBXW2       | -0.114345388 | 7.467214724 | 0.005903185 |
| GPR126      | -0.076009584 | 6.126193264 | 0.005904398 |
| SP2         | 0.105881525  | 7.656227173 | 0.005907399 |
| NF2         | -0.047469874 | 6.16190718  | 0.0059075   |

## DEG.infomation

|           |              |             |             |
|-----------|--------------|-------------|-------------|
| HLA-A     | -0.166688445 | 11.94086231 | 0.005918336 |
| LOC285033 | -0.051116651 | 6.235695109 | 0.00592306  |
| C21ORF123 | 0.066256347  | 5.997915673 | 0.005948161 |
| C16ORF68  | -0.175306811 | 9.19598051  | 0.00595508  |
| GIMAP6    | -0.139360586 | 7.926981425 | 0.005973413 |
| TOM1L2    | 0.124649434  | 7.476306066 | 0.005980251 |
| GATA5     | 0.178769219  | 6.445770101 | 0.005987947 |
| KCNT1     | -0.238617553 | 7.138746759 | 0.005991608 |
| LOC653291 | 0.075927644  | 6.05961794  | 0.005993689 |
| LOC729446 | 0.095785405  | 7.589376502 | 0.006008203 |
| LOC650251 | 0.146272255  | 6.804113392 | 0.006014223 |
| LOC285216 | -0.076178447 | 6.132394904 | 0.006017768 |
| LYL1      | -0.154025347 | 8.794128765 | 0.006020707 |
| MRPS12    | -0.134503436 | 9.011671832 | 0.006033943 |
| TIAM1     | -0.077463854 | 6.169528934 | 0.006034763 |
| KCNF1     | 0.090769063  | 6.169973376 | 0.006038455 |
| EXT2      | -0.105537828 | 7.673068906 | 0.006043794 |
| SEC61A2   | 0.094372352  | 6.892366271 | 0.006058081 |
| RTF1      | 0.082039985  | 6.631266302 | 0.006072925 |
| NME2      | -0.077514143 | 6.765738382 | 0.006080038 |
| RNF7      | 0.148969145  | 10.07560872 | 0.006083281 |
| SPIRE2    | -0.078641655 | 6.157346388 | 0.006099327 |
| LOC653907 | -0.065798476 | 6.062357019 | 0.006101558 |
| DEFB107A  | 0.071288757  | 6.362575314 | 0.006114519 |
| ZNF26     | 0.089518957  | 7.101214647 | 0.006121961 |
| ARRDC5    | -0.076990847 | 5.967133609 | 0.006144738 |
| LOC647570 | 0.076188431  | 6.431218935 | 0.006147879 |
| TRIM28    | -0.11109302  | 7.929873716 | 0.006151193 |
| KLF10     | -0.078873289 | 6.476878604 | 0.006165183 |
| RCN2      | 0.164717606  | 8.508496243 | 0.00617697  |
| ZFP36L1   | -0.264175946 | 9.076742294 | 0.006180758 |
| ZDHHC14   | 0.219427765  | 7.970209291 | 0.006192374 |
| KRT8      | -0.164486111 | 7.799983226 | 0.006195028 |
| PRKRIR    | 0.142909017  | 9.583951531 | 0.006195727 |
| PRND      | 0.12658402   | 6.132460311 | 0.006198376 |
| NEK3      | 0.064597801  | 6.490281821 | 0.006208149 |
| SPINK1    | -0.288569241 | 6.326552355 | 0.006211503 |
| FAM73A    | -0.219272535 | 8.224114415 | 0.006213687 |
| SLC25A46  | 0.137017604  | 9.258227742 | 0.006214017 |
| BUB1      | 0.094037531  | 6.124200798 | 0.006214928 |
| CDR2      | -0.148550395 | 7.635591728 | 0.006224965 |
| LOC653147 | 0.132773913  | 8.832664374 | 0.006251931 |
| DDX51     | -0.228810724 | 10.73903539 | 0.006259967 |
| SESTD1    | 0.133621249  | 7.708629035 | 0.006285534 |
| ZCCHC14   | 0.126450921  | 8.311970147 | 0.006287014 |
| ODC1      | 0.213672269  | 9.965846598 | 0.006292201 |
| TTMA      | 0.049147879  | 6.034872848 | 0.006307629 |
| GPR89C    | -0.081710048 | 6.740958113 | 0.006324677 |
| PHLPP     | 0.088372039  | 6.474579131 | 0.006326097 |
| HSD17B4   | 0.145313878  | 10.29922915 | 0.006327285 |
| RPUSD4    | 0.154062296  | 10.80923776 | 0.006330967 |

## DEG.infomation

|           |              |             |             |
|-----------|--------------|-------------|-------------|
| C21ORF55  | -0.170571502 | 12.79676785 | 0.006337277 |
| LOC643356 | -0.062686453 | 6.013726005 | 0.00634967  |
| FLJ11292  | 0.119958003  | 6.767255226 | 0.00636136  |
| COMMD4    | 0.090991822  | 8.203438554 | 0.006392317 |
| STXBP1    | -0.070507915 | 6.757270944 | 0.006399811 |
| TMIE      | 0.06927086   | 6.086574671 | 0.006432817 |
| TRPC6     | -0.082514612 | 6.46576417  | 0.006444979 |
| XKR8      | 0.059747287  | 6.859672715 | 0.006451297 |
| GDF9      | 0.071560653  | 6.205956783 | 0.006463173 |
| PPM1E     | 0.227958965  | 6.796688975 | 0.00646623  |
| MYO7A     | -0.090174982 | 6.492690004 | 0.006466363 |
| NPPC      | -0.108588914 | 6.216528897 | 0.006471746 |
| LOC728006 | 0.117068771  | 8.710551957 | 0.006482651 |
| PPARD     | -0.058497786 | 6.45471808  | 0.006489688 |
| NUP35     | -0.090274859 | 6.731924899 | 0.006519548 |
| NPPA      | 0.931967862  | 12.41831102 | 0.006521991 |
| C1ORF159  | -0.072555387 | 6.522581136 | 0.006526337 |
| KRTCAP3   | 0.111305858  | 6.509731702 | 0.006543775 |
| LTV1      | -0.163728375 | 8.078029107 | 0.006544332 |
| FGF11     | -0.102769086 | 6.482554997 | 0.006563628 |
| BAD       | -0.092957521 | 7.412907747 | 0.006566546 |
| SNURF     | 0.205971175  | 10.3864453  | 0.006566833 |
| ELMO3     | -0.069544136 | 6.167854155 | 0.0065766   |
| PRLH      | 0.06934526   | 6.030509726 | 0.00657831  |
| CREB3L3   | 0.062417672  | 5.923075152 | 0.006583391 |
| ZNF225    | 0.069084718  | 6.477779044 | 0.006592247 |
| CALHM2    | -0.125847168 | 6.735438331 | 0.006599193 |
| UBXN4     | 0.133769347  | 10.16943757 | 0.006609466 |
| SETD4     | 0.081647139  | 6.890506559 | 0.006610696 |
| ZNF775    | 0.083691649  | 6.61332567  | 0.00661529  |
| NANOS3    | 0.099841037  | 6.975657844 | 0.006617842 |
| FUT6      | -0.078689301 | 6.495256424 | 0.006621394 |
| MGC27345  | -0.092294581 | 6.482305722 | 0.00662497  |
| CAMTA1    | 0.119098876  | 6.821540124 | 0.006625982 |
| NUDCD1    | -0.082923001 | 6.22458794  | 0.006651289 |
| EBAG9     | 0.12020597   | 8.620693865 | 0.006657516 |
| C3ORF39   | 0.116699891  | 7.840390383 | 0.00665813  |
| RILP      | 0.108482607  | 7.185060908 | 0.006660131 |
| C18ORF56  | 0.080877766  | 6.194209165 | 0.006665923 |
| ZNF384    | 0.083767654  | 6.613993581 | 0.006668848 |
| CD200R2   | 0.071896928  | 5.939387389 | 0.006669277 |
| ZNF69     | -0.203548762 | 10.17035207 | 0.006669423 |
| CDC14B    | 0.109154586  | 7.75415815  | 0.006674149 |
| STRN4     | -0.080872401 | 6.851614152 | 0.006686658 |
| WWC3      | 0.130357677  | 8.400803492 | 0.006699296 |
| CORO2B    | -0.06542476  | 6.416256385 | 0.006705551 |
| S100A2    | 0.088359703  | 6.842713272 | 0.006716817 |
| FHOD1     | 0.131629424  | 7.884984162 | 0.006732713 |
| CLSTN1    | 0.124228147  | 8.615004942 | 0.006737282 |
| PDCL3     | 0.096620975  | 8.766319803 | 0.006743649 |
| RHBDL2    | -0.199058899 | 7.633803408 | 0.006745605 |

## DEG.infomation

|               |              |             |             |
|---------------|--------------|-------------|-------------|
| LOC642277     | -0.067172409 | 6.046619264 | 0.00675991  |
| LOC646667     | 0.066219657  | 6.09194865  | 0.006783826 |
| MTMR11        | 0.108464062  | 7.088940654 | 0.006810651 |
| LOC388282     | 0.047122965  | 6.227453448 | 0.00682602  |
| TMEM128       | 0.145890396  | 6.648992907 | 0.006829808 |
| OR2A9P        | -0.063348502 | 6.227385748 | 0.006834873 |
| FEM1A         | -0.15356453  | 10.57450741 | 0.006835039 |
| PLGLA         | 0.054917631  | 6.125840991 | 0.006844279 |
| NISCH         | 0.11732385   | 9.268223388 | 0.006845367 |
| FLJ40473      | 0.074214602  | 6.168039551 | 0.006854025 |
| DGKA          | -0.055103225 | 6.111289115 | 0.006866443 |
| RUNDC2C       | -0.112933328 | 7.118635075 | 0.006870305 |
| TNFSF15       | -0.119590749 | 7.184453939 | 0.006889115 |
| TSPO          | -0.10740519  | 10.91027938 | 0.006921552 |
| GRIP2         | 0.066460613  | 6.212396621 | 0.006929631 |
| C21ORF62      | -0.115082515 | 5.991444883 | 0.006935071 |
| FKSG24        | -0.102001345 | 6.703643465 | 0.006938053 |
| CXORF36       | -0.064169868 | 6.093781332 | 0.006959952 |
| MGC15763      | 0.11148715   | 7.054713997 | 0.006964937 |
| ACSS1         | 0.259686915  | 8.978803599 | 0.006972932 |
| MTMR12        | 0.11665517   | 6.959066245 | 0.006983764 |
| ZNF184        | 0.083556574  | 6.200722567 | 0.006995388 |
| NDUFS3        | 0.123664771  | 12.46848923 | 0.007005045 |
| SCPEP1        | 0.183659196  | 9.433363658 | 0.00701367  |
| CD302         | -0.113787606 | 6.994710361 | 0.007022861 |
| KCNJ12        | -0.160929551 | 6.624732712 | 0.00703322  |
| GPR89B        | -0.103209471 | 7.029728175 | 0.00704757  |
| IGSF3         | -0.191630778 | 7.637411083 | 0.007057185 |
| CHCHD3        | 0.140769231  | 9.458225655 | 0.007062285 |
| RBM45         | 0.118543098  | 7.331411924 | 0.007092195 |
| MTR           | 0.184684657  | 8.277056148 | 0.007093014 |
| STXBP5        | 0.102439211  | 7.400664735 | 0.007099076 |
| ANGEL2        | 0.103222255  | 8.865152059 | 0.007099088 |
| C3ORF36       | -0.068543471 | 6.226140841 | 0.00710213  |
| LOC727909     | 0.062989325  | 6.037945796 | 0.007106729 |
| TXNDC9        | 0.18539111   | 8.103433853 | 0.007131292 |
| KCNMB2        | 0.048826295  | 6.215794627 | 0.007144027 |
| C1ORF71       | -0.152372226 | 9.107413068 | 0.007146489 |
| TM2D3         | -0.084263362 | 9.175266665 | 0.007157456 |
| LOC644961     | -0.069827494 | 5.961130743 | 0.00716172  |
| C8ORF44       | 0.075715191  | 6.393953174 | 0.007183256 |
| DSCR5         | 0.121224623  | 6.187340463 | 0.007189383 |
| MARCH3        | -0.240644942 | 9.263816176 | 0.007193958 |
| NAB2          | 0.12884416   | 6.566585989 | 0.007194562 |
| C15ORF23      | 0.11273291   | 6.69587718  | 0.007197371 |
| PPEF1         | -0.09748983  | 6.113577073 | 0.007200011 |
| ISL1          | 0.063758941  | 6.095180065 | 0.00722503  |
| LOC646019     | -0.064874918 | 6.048308139 | 0.007229347 |
| MCEE          | 0.18191939   | 10.11790372 | 0.007235306 |
| DKFZP451M2119 | 0.090010471  | 6.369782367 | 0.007242997 |
| LOC728492     | 0.171385898  | 10.39624438 | 0.007254097 |

## DEG.infomation

|            |              |             |             |
|------------|--------------|-------------|-------------|
| TRAF3IP2   | -0.104697485 | 7.491359655 | 0.007257808 |
| FIBCD1     | -0.113431576 | 6.508372031 | 0.007271533 |
| LOC641693  | 0.069011279  | 6.152761792 | 0.0072729   |
| LOC652773  | 0.193366518  | 7.921152134 | 0.007279798 |
| FANCC      | -0.077871086 | 6.164425782 | 0.007291338 |
| LOC644935  | 0.101143819  | 8.073450115 | 0.007297276 |
| AADAT      | 0.041097346  | 6.233873961 | 0.007311869 |
| ORC6L      | -0.135246887 | 13.03882178 | 0.007312934 |
| C4ORF39    | 0.080221677  | 6.290328941 | 0.007319596 |
| C17ORF49   | -0.116856372 | 8.714649272 | 0.007323396 |
| ZC3H8      | 0.171024038  | 6.761347344 | 0.007327546 |
| WRB        | 0.14580217   | 8.342941156 | 0.007331306 |
| TAF8       | 0.090216053  | 6.249604932 | 0.007336159 |
| NCAN       | 0.081366575  | 6.758798626 | 0.007336875 |
| TRIM27     | -0.08616717  | 6.917418891 | 0.007345801 |
| PDCD10     | 0.128493828  | 7.718213901 | 0.007347946 |
| LOC644537  | 0.063711032  | 6.041746885 | 0.007353876 |
| TIMP3      | -0.227253242 | 9.613905764 | 0.007354179 |
| MAGMAS     | -0.122272773 | 10.18605154 | 0.007356561 |
| B2M        | -0.162282772 | 12.39179885 | 0.007357415 |
| RAD51C     | 0.100817641  | 7.927978083 | 0.007360501 |
| RQCD1      | 0.187816192  | 8.909532994 | 0.007373334 |
| FGFR1OP2   | 0.146646736  | 6.935360543 | 0.007373367 |
| CTSA       | -0.136407568 | 8.502327261 | 0.007398596 |
| ZNF264     | -0.114827384 | 6.833687333 | 0.007400711 |
| LOC391771  | 0.061791884  | 6.120641852 | 0.007405085 |
| ST6GALNAC1 | 0.107789713  | 6.383835026 | 0.0074465   |
| RRN3       | 0.207327939  | 7.047465699 | 0.00746068  |
| SYP        | -0.072047271 | 6.083341698 | 0.007463334 |
| C22ORF32   | 0.112461722  | 7.350836778 | 0.00749138  |
| APOB       | -0.226046169 | 7.122542252 | 0.007499875 |
| LOC646119  | -0.060218569 | 5.959581548 | 0.00751062  |
| FBXO34     | 0.108584432  | 8.199376909 | 0.007515789 |
| NIP30      | 0.098763482  | 7.414294498 | 0.007516731 |
| EZH2       | -0.045955738 | 6.107132975 | 0.007523373 |
| ARL6       | 0.043045356  | 6.0605854   | 0.007524371 |
| LOC399900  | -0.178206874 | 12.69185407 | 0.007548857 |
| SH3YL1     | 0.119564265  | 7.140620927 | 0.00756964  |
| PMCH       | 0.069243781  | 5.955375296 | 0.007580582 |
| MPEG1      | -0.067951566 | 6.300530635 | 0.007582899 |
| KLF13      | -0.167657191 | 8.98830188  | 0.007594101 |
| GRPEL2     | 0.124646663  | 8.608651933 | 0.007600592 |
| C3ORF30    | -0.047013032 | 6.212768145 | 0.007623011 |
| C5ORF42    | 0.05515666   | 6.251929203 | 0.00762989  |
| ATAD2      | 0.162640797  | 7.225631301 | 0.007631664 |
| RBM4       | -0.094505851 | 7.250920938 | 0.007665611 |
| ARL3       | 0.105965715  | 6.906557074 | 0.007665811 |
| C14ORF94   | 0.160518938  | 7.377249363 | 0.007667941 |
| MRPL14     | -0.138316574 | 10.00168529 | 0.007675323 |
| LOC648706  | 0.082469957  | 6.152673508 | 0.007678632 |
| ZNF322A    | 0.083656623  | 6.443749711 | 0.00768145  |

## DEG.infomation

|           |              |             |             |
|-----------|--------------|-------------|-------------|
| UBL5      | 0.166032547  | 9.713648824 | 0.007700453 |
| SERPINF1  | 0.232301268  | 8.722721735 | 0.007711662 |
| C1QTNF6   | -0.062596017 | 6.165938963 | 0.007717629 |
| USP3      | -0.108694768 | 8.121346833 | 0.007720807 |
| TMEM66    | 0.112737363  | 12.10564152 | 0.007723654 |
| LOC641896 | -0.065658766 | 6.117949229 | 0.007727473 |
| MYLIP     | 0.183646876  | 8.525982468 | 0.007738957 |
| DOT1L     | -0.083576565 | 6.259629391 | 0.007739249 |
| PHF14     | 0.070466783  | 7.036824526 | 0.007741727 |
| SEL1L     | -0.088256465 | 6.7523988   | 0.00776119  |
| ARHGAP26  | -0.084544447 | 6.495512491 | 0.007780128 |
| RPUSD2    | 0.111712641  | 8.947876164 | 0.007803041 |
| LOC439957 | -0.070480609 | 5.964167748 | 0.007804378 |
| TMEM136   | 0.128004667  | 8.769030674 | 0.007805064 |
| TIMM17B   | 0.112049977  | 8.393532872 | 0.00781014  |
| CNOT10    | 0.086627858  | 7.263442372 | 0.00781136  |
| C16ORF86  | 0.102330126  | 6.761144737 | 0.007820861 |
| SSX5      | 0.061781186  | 6.119702443 | 0.007835185 |
| LOC646317 | -0.070057971 | 6.236981851 | 0.007844852 |
| PRPS2     | -0.077968013 | 6.647813228 | 0.007845884 |
| CENPJ     | 0.092809628  | 6.883304112 | 0.007855246 |
| ACTR1A    | -0.107553909 | 9.923731068 | 0.007860907 |
| VAPB      | 0.209874777  | 6.538837112 | 0.007876889 |
| TMTC2     | -0.072076386 | 6.25111798  | 0.007921254 |
| XPOT      | -0.110644978 | 6.457588486 | 0.007940639 |
| LPCAT2    | -0.090515923 | 6.358790207 | 0.007954536 |
| ACOX3     | -0.094981289 | 8.525643119 | 0.007958927 |
| CRTAC1    | 0.166497771  | 6.455463066 | 0.007965672 |
| KCNH2     | -0.109014717 | 7.415077191 | 0.007965694 |
| ORMDL2    | -0.112784584 | 6.20756173  | 0.007977577 |
| KIF9      | 0.042392967  | 6.051950996 | 0.007979426 |
| UTP11L    | -0.17286528  | 8.932307612 | 0.007989392 |
| IWS1      | -0.109168402 | 8.18916916  | 0.007996181 |
| C6ORF120  | -0.103862522 | 6.708532928 | 0.008001558 |
| LOC388181 | 0.076098851  | 6.083592242 | 0.008005919 |
| ADH1C     | -0.163865536 | 6.492224321 | 0.008009768 |
| FLRT3     | 0.059404483  | 6.087404391 | 0.008011027 |
| TRIM21    | -0.113698715 | 6.827144788 | 0.008014217 |
| MRPS34    | -0.156624278 | 6.93748119  | 0.008027436 |
| C9ORF116  | 0.067422129  | 6.397373415 | 0.008028101 |
| WDR61     | 0.108061358  | 9.40378042  | 0.008031721 |
| CCR5      | -0.056306492 | 6.056870273 | 0.008039016 |
| C6ORF222  | 0.089749542  | 6.599974927 | 0.008048934 |
| ZNF227    | 0.098505735  | 6.663508516 | 0.008049628 |
| C19ORF25  | 0.087027629  | 6.951878759 | 0.008055823 |
| PIK3AP1   | -0.128640616 | 6.328980871 | 0.008088852 |
| HIST1H2BC | 0.097858736  | 6.331867024 | 0.008117756 |
| MAPK8IP1  | 0.158410912  | 6.455986156 | 0.008124573 |
| TRNAU1AP  | 0.05598141   | 6.545515862 | 0.008130099 |
| BCAS3     | 0.076023662  | 6.310262943 | 0.008132    |
| REEP5     | 0.120942393  | 11.57257247 | 0.008132418 |

## DEG.infomation

|           |              |             |             |
|-----------|--------------|-------------|-------------|
| APBA2BP   | 0.099468702  | 6.259208274 | 0.008135323 |
| KLRB1     | 0.107023614  | 6.388458105 | 0.008143564 |
| ERCC3     | 0.105696442  | 7.863723366 | 0.008145762 |
| LOC652634 | -0.1686003   | 7.406330266 | 0.008150749 |
| SFXN5     | 0.100244905  | 6.783243034 | 0.008165222 |
| BRMS1L    | 0.113231462  | 7.347515476 | 0.008185841 |
| PITPNM2   | -0.076954447 | 6.517804664 | 0.008193189 |
| LOC654260 | -0.093183279 | 6.806939153 | 0.008212662 |
| GPR137B   | 0.151441063  | 8.541643687 | 0.00823946  |
| IFIT5     | 0.118723521  | 6.774141442 | 0.008243589 |
| ZNF154    | 0.081670889  | 6.887922545 | 0.008246703 |
| RIF1      | 0.091037362  | 6.844207977 | 0.008248133 |
| LOC728844 | -0.081634905 | 6.06171284  | 0.008248314 |
| LOC648695 | 0.131452166  | 7.74330824  | 0.008248336 |
| HDAC4     | 0.191030596  | 7.902649646 | 0.008248803 |
| DYNLT3    | 0.158130459  | 8.019955094 | 0.008259955 |
| MDM4      | 0.097808851  | 6.446724614 | 0.00827803  |
| DHX30     | 0.089219966  | 8.029165876 | 0.008278991 |
| P2RY8     | -0.127384848 | 6.631269763 | 0.008279961 |
| BAIAP2    | -0.053837711 | 6.424192093 | 0.008283195 |
| P2RY14    | 0.058284556  | 6.122288933 | 0.008305566 |
| AP2A2     | -0.110583593 | 7.054573275 | 0.008308281 |
| LOC144983 | 0.050492246  | 6.204762989 | 0.00836289  |
| ZNF608    | 0.103752145  | 6.560737463 | 0.008367551 |
| STARD3NL  | -0.110643775 | 7.489535664 | 0.008376558 |
| ZNF555    | 0.079300409  | 6.318656297 | 0.008386802 |
| TFPT      | 0.097821779  | 7.75740546  | 0.008395191 |
| NDUFV3    | 0.108530538  | 6.994957791 | 0.008396117 |
| PIP5K2A   | -0.063699271 | 6.17082369  | 0.008416907 |
| TTLL5     | 0.08527476   | 7.449173414 | 0.008426221 |
| SKIV2L2   | 0.108406273  | 8.71255749  | 0.008431734 |
| PHF20L1   | 0.077380464  | 7.353763554 | 0.008448519 |
| NT5C1A    | 0.091596932  | 6.196633094 | 0.008449352 |
| CKB       | -0.240075842 | 10.15887467 | 0.008461591 |
| SAA2      | -0.073006759 | 6.031187568 | 0.00847453  |
| LCAT      | 0.103410411  | 7.029105444 | 0.008479608 |
| PRAM1     | -0.080579547 | 6.137327953 | 0.008483509 |
| NCOA1     | -0.093279158 | 8.143036243 | 0.008494283 |
| HISPPD2A  | 0.064007821  | 6.521207743 | 0.008501131 |
| JAM2      | 0.203734408  | 8.8456884   | 0.008503643 |
| AGPAT2    | 0.131188545  | 8.053607722 | 0.008531544 |
| F12       | -0.066156639 | 6.192322312 | 0.008544189 |
| ACIN1     | 0.112165134  | 8.390264314 | 0.008547417 |
| NOL11     | -0.13860772  | 9.039085607 | 0.008552277 |
| MMS19L    | 0.092785316  | 9.542028824 | 0.008556263 |
| INPP5B    | -0.092232755 | 6.899703759 | 0.008557625 |
| DAG1      | -0.116487383 | 9.036419831 | 0.008571307 |
| ANKRD9    | -0.175429517 | 11.05046745 | 0.008583454 |
| LOC642678 | -0.131693184 | 6.632076887 | 0.0085959   |
| FAHD2A    | 0.129051201  | 7.400211219 | 0.008600362 |
| MAPKAPK5  | -0.087481097 | 7.878559857 | 0.008601816 |



## DEG.infomation

|           |              |             |             |
|-----------|--------------|-------------|-------------|
| ZNF519    | 0.046735527  | 6.138766029 | 0.008625224 |
| OPN1MW    | -0.050555784 | 6.023492173 | 0.008629253 |
| SUMO2     | 0.149196464  | 9.460136402 | 0.008643338 |
| C21ORF56  | -0.125998226 | 6.627705686 | 0.008651326 |
| PCMT1     | 0.140291723  | 12.1941609  | 0.00865525  |
| C19ORF47  | -0.070597979 | 6.262444615 | 0.008658964 |
| CKS1B     | -0.135853326 | 8.393394141 | 0.008663011 |
| LOC649555 | -0.194249287 | 8.127369467 | 0.00868641  |
| TXNL4A    | -0.07543272  | 6.322165676 | 0.008695476 |
| EWSR1     | -0.081533871 | 9.392755655 | 0.008699083 |
| KIAA1704  | 0.064790363  | 6.238095668 | 0.008703547 |
| LEP       | -0.186505672 | 7.4894739   | 0.008711336 |
| DEF8      | 0.082113956  | 8.114925904 | 0.008751582 |
| PPFIBP1   | -0.168907354 | 8.428014009 | 0.008767116 |
| ZDHC24    | -0.07678401  | 6.588804982 | 0.008782006 |
| CEP170    | 0.043786849  | 6.191809002 | 0.008792614 |
| RAE1      | -0.094862141 | 7.531693074 | 0.008810691 |
| ATOX8     | -0.165260557 | 7.536131377 | 0.008827872 |
| SNAPIN    | 0.185672288  | 7.177407941 | 0.008839941 |
| MKX       | 0.103982775  | 6.061064282 | 0.008852383 |
| SLC7A6OS  | 0.111645578  | 6.726510025 | 0.008859273 |
| CNNM3     | 0.106666841  | 7.324235905 | 0.00887041  |
| OR4P4     | -0.069932855 | 6.188198367 | 0.008892101 |
| PDE6C     | -0.050117337 | 5.931595957 | 0.008906075 |
| CDK5RAP3  | 0.121986644  | 8.43796464  | 0.008907975 |
| ABCC4     | -0.105758669 | 6.543693343 | 0.008912859 |
| PIGM      | 0.128458095  | 7.115978581 | 0.00891813  |
| PPM2C     | 0.22094983   | 7.848329319 | 0.008921839 |
| DYNLL1    | 0.19416524   | 10.49676207 | 0.00893225  |
| LOC654042 | 0.047235817  | 6.246312718 | 0.008933808 |
| FBXO28    | 0.096416504  | 7.907308986 | 0.008935495 |
| PHF8      | 0.055846281  | 6.059085842 | 0.008969296 |
| GGA2      | -0.113306268 | 7.921319523 | 0.00897927  |
| MMP16     | -0.044843149 | 5.956570773 | 0.008979534 |
| TASP1     | 0.084361875  | 6.710623863 | 0.00898565  |
| LOC647543 | -0.277635564 | 7.400358493 | 0.009004329 |
| ARRB2     | -0.06833066  | 6.265558826 | 0.009004596 |
| LOC643242 | 0.064056811  | 5.979463057 | 0.009011742 |
| ELFN2     | 0.06825784   | 6.047410818 | 0.00901207  |
| KIAA0241  | -0.07343254  | 6.423817257 | 0.009018381 |
| SUCLG1    | 0.129501666  | 11.70564814 | 0.009022217 |
| OR2Y1     | -0.065528503 | 5.949086155 | 0.009045819 |
| ELN       | -0.126248408 | 6.412342247 | 0.009052011 |
| NARS2     | 0.141818865  | 7.894869317 | 0.009054903 |
| AGPAT3    | -0.06296587  | 6.184495487 | 0.009060711 |
| LBH       | -0.136921545 | 8.280393903 | 0.009061558 |
| C6ORF204  | -0.171936841 | 6.798327657 | 0.009063327 |
| TRIM55    | -0.242771427 | 9.235514451 | 0.009086078 |
| RAB3GAP1  | 0.120131677  | 11.06637981 | 0.009086169 |
| CPSF2     | 0.082913517  | 7.748934817 | 0.009089845 |
| PHC3      | -0.055153784 | 6.306281119 | 0.009095119 |

## DEG.infomation

|           |              |             |             |
|-----------|--------------|-------------|-------------|
| LOC643668 | 0.180343601  | 9.42818178  | 0.009098586 |
| LRMP      | 0.083296401  | 6.374380045 | 0.009101833 |
| SELL      | -0.085509639 | 6.173185849 | 0.009122089 |
| ANKRD28   | -0.080968771 | 7.189118849 | 0.009128017 |
| C10ORF4   | 0.036356157  | 6.235599312 | 0.009129419 |
| NIPA1     | -0.120912092 | 7.343984915 | 0.009138571 |
| SIP1      | 0.108639976  | 7.557588831 | 0.009154131 |
| C20ORF45  | -0.145169671 | 8.289745179 | 0.009167072 |
| USP33     | 0.105961     | 6.795708819 | 0.009177093 |
| OR56B4    | -0.066313975 | 6.433117155 | 0.00920925  |
| EIF3G     | -0.12043102  | 10.83855342 | 0.00921297  |
| SELENBP1  | -0.229737326 | 7.76594679  | 0.009242287 |
| TMEM60    | 0.10499986   | 8.960944511 | 0.009251641 |
| LOC442060 | 0.057830811  | 5.97240906  | 0.009253051 |
| BCL7C     | 0.096394684  | 7.851234396 | 0.009263415 |
| LOC647766 | -0.069081727 | 6.132040817 | 0.00926483  |
| TP53AP1   | 0.07903797   | 6.695683072 | 0.009266897 |
| SCGB1D1   | 0.078023105  | 6.409595331 | 0.009279418 |
| VWA5A     | -0.074778494 | 6.267424554 | 0.009280032 |
| MRAS      | 0.180473058  | 8.660278944 | 0.009299567 |
| SP5       | -0.079045451 | 6.408666317 | 0.009302982 |
| RNASEH2B  | 0.231093987  | 8.091490345 | 0.009304896 |
| FLJ23152  | 0.07002449   | 6.490470877 | 0.009314343 |
| C10ORF47  | -0.056165882 | 6.14542763  | 0.009331566 |
| GIPC1     | 0.09759048   | 8.513368684 | 0.009348517 |
| THUMPD1   | 0.116008885  | 7.75580569  | 0.009352442 |
| PDIA2     | 0.079718212  | 6.314261388 | 0.009353334 |
| ABCD3     | -0.127493553 | 7.66472534  | 0.0093725   |
| RBAK      | 0.075909606  | 6.456831066 | 0.009380714 |
| DDX1      | 0.137051056  | 11.38291274 | 0.009384321 |
| LOC651546 | 0.056256183  | 6.033665986 | 0.009407596 |
| PARN      | 0.11040227   | 7.936199352 | 0.009422617 |
| TSPAN31   | 0.095746359  | 9.429462184 | 0.009446156 |
| LOC728944 | 0.1221052    | 7.718973941 | 0.009451831 |
| KCND2     | -0.062230998 | 5.974352015 | 0.009462844 |
| LOC389257 | 0.176620677  | 6.782826339 | 0.009463888 |
| EBP       | -0.199154628 | 7.783272139 | 0.009472129 |
| LOC96597  | 0.06780537   | 6.004286298 | 0.009472971 |
| ACTR1B    | 0.093516542  | 8.979728349 | 0.009482957 |
| EIF3J     | -0.129247546 | 8.024251596 | 0.009488257 |
| PTGIR     | -0.075547669 | 6.265237186 | 0.009490704 |
| KY        | 0.087062251  | 6.948856447 | 0.009513412 |
| ALDH2     | 0.160164569  | 10.69770966 | 0.009514843 |
| TTY5      | 0.048974244  | 6.130757266 | 0.009516842 |
| LOC145837 | 0.064873715  | 6.147526219 | 0.009529243 |
| GKAP1     | 0.175817925  | 7.495604716 | 0.009545177 |
| BTBD15    | 0.147277955  | 7.201138158 | 0.009565296 |
| RBBP8     | -0.079626286 | 6.857160839 | 0.009572482 |
| AES       | 0.111144561  | 10.20750679 | 0.009609747 |
| LOC644336 | -0.072859902 | 5.985894962 | 0.009613774 |
| UTP15     | -0.089439188 | 6.775978303 | 0.009615234 |

## DEG.infomation

|           |              |             |             |
|-----------|--------------|-------------|-------------|
| KLHL22    | 0.144397611  | 8.932385067 | 0.009616947 |
| CCDC3     | 0.193023923  | 7.329323085 | 0.009618509 |
| FLJ46358  | 0.068716188  | 6.105520208 | 0.009641075 |
| SLC20A2   | -0.15145848  | 9.295303679 | 0.009652347 |
| PNPT1     | -0.146053467 | 11.66212351 | 0.009673559 |
| ST3GAL4   | -0.189642776 | 7.657285663 | 0.009681124 |
| RANBP6    | -0.173048562 | 7.141079254 | 0.009681233 |
| SLC25A40  | 0.103082578  | 6.776958222 | 0.009685717 |
| C1QTNF9   | 0.11669063   | 6.303668437 | 0.009686168 |
| LOC642372 | -0.071780475 | 5.957345069 | 0.009699122 |
| HDAC1     | -0.079845211 | 10.15271582 | 0.009713728 |
| CPEB2     | 0.106636919  | 7.039338256 | 0.009720511 |
| FLOT1     | -0.109691494 | 10.17046344 | 0.009727764 |
| XKR6      | 0.054847692  | 6.31630653  | 0.009729452 |
| ZNF364    | 0.190083791  | 10.96865912 | 0.009746802 |
| DERPC     | -0.07014111  | 6.235458486 | 0.009768532 |
| TRA1P2    | -0.206121026 | 7.353335624 | 0.009776075 |
| DDX54     | 0.174927047  | 7.89339996  | 0.009777906 |
| SCN4B     | 0.177559706  | 6.935994987 | 0.009780834 |
| LRRC59    | -0.088643845 | 6.272644948 | 0.009792789 |
| TMOD4     | 0.070185888  | 6.421423452 | 0.009796683 |
| ICOS      | 0.067819892  | 6.2664882   | 0.009802881 |
| YWHAB     | -0.151067701 | 10.71273091 | 0.009824164 |
| PCDH19    | 0.084412956  | 6.519253644 | 0.009838911 |
| DNAJC5G   | 0.082762829  | 6.323388061 | 0.009839229 |
| C22ORF36  | 0.095521646  | 6.66706784  | 0.009839489 |
| LOC648399 | 0.132120188  | 6.660689191 | 0.00984034  |
| NR0B2     | 0.121884772  | 6.378960439 | 0.009855413 |
| MID1      | 0.137205818  | 8.661144707 | 0.009857011 |
| AFF1      | -0.107356605 | 7.493750246 | 0.009860863 |
| LOC650369 | -0.217947353 | 8.969990908 | 0.009875908 |
| PSMA2     | 0.103002237  | 8.299520867 | 0.009884598 |
| FBN3      | 0.058746521  | 6.158929003 | 0.009901707 |
| KLRG2     | -0.076135728 | 6.332527311 | 0.009905158 |
| TLE3      | -0.085548406 | 6.343895386 | 0.00990861  |
| SSRP1     | -0.101245861 | 6.688527748 | 0.00991744  |
| C6ORF150  | -0.065549694 | 5.928058063 | 0.0099268   |
| PIWIL4    | 0.053357571  | 6.227399323 | 0.009935422 |
| GTF2IRD2P | 0.09247472   | 6.694007029 | 0.009943604 |
| WNK1      | -0.119412698 | 9.511894509 | 0.009945396 |
| SPHAR     | 0.201577198  | 7.700244654 | 0.009949308 |
| SHOX2     | 0.050004988  | 6.369905168 | 0.009960667 |
| LOC643431 | -0.100553142 | 6.282564084 | 0.009971082 |
| MPP4      | -0.058028065 | 5.918758078 | 0.009983999 |
| HS3ST3A1  | -0.211333947 | 6.875159879 | 0.009987746 |
| LOC402057 | -0.10898122  | 12.01403283 | 0.009995051 |
| ADAM8     | -0.068671378 | 6.092398658 | 0.010002273 |
| WWP1      | 0.143656502  | 10.02602233 | 0.010008963 |
| LOC653182 | -0.057929751 | 6.079563081 | 0.010010022 |
| LOC90586  | -0.223307894 | 9.749864808 | 0.010035026 |
| DEFA3     | -0.074215329 | 6.012280682 | 0.010042117 |

## DEG.infomation

|           |              |             |             |
|-----------|--------------|-------------|-------------|
| HRCT1     | -0.137276152 | 6.482426776 | 0.01008108  |
| MFSD3     | -0.153821568 | 9.360583412 | 0.010119378 |
| SLC28A2   | 0.058544335  | 5.974896229 | 0.010121472 |
| RPL13L    | -0.140683032 | 7.595310321 | 0.010126527 |
| GPBP1     | 0.089002124  | 8.334150218 | 0.010142001 |
| NAV2      | -0.147176086 | 8.029467879 | 0.010155298 |
| TRIM74    | 0.079172725  | 6.226061947 | 0.01016171  |
| EIF4H     | -0.126932048 | 10.15834668 | 0.010168591 |
| EXOC3     | -0.116438982 | 8.103443589 | 0.010179502 |
| DDX31     | -0.054632829 | 6.481234292 | 0.010191391 |
| CLCN2     | 0.067766711  | 6.293441179 | 0.010195712 |
| SFRS15    | 0.126742768  | 7.729706297 | 0.010201105 |
| ACP5      | -0.068873907 | 5.963165457 | 0.010212815 |
| LYSMD2    | -0.204184148 | 8.295646088 | 0.01021579  |
| NXF2B     | -0.045130351 | 6.073930875 | 0.010216651 |
| PPIG      | 0.115274521  | 7.146663027 | 0.010223499 |
| PGA4      | -0.070539507 | 5.917999925 | 0.010265497 |
| C19ORF50  | -0.125916037 | 8.092581902 | 0.010296011 |
| BZW2      | 0.110365152  | 11.77345239 | 0.010304452 |
| MOXD1     | 0.198861515  | 7.29755384  | 0.010334158 |
| PARP4     | -0.124689996 | 9.304073275 | 0.010342776 |
| PDZRN4    | 0.050296086  | 6.005530816 | 0.010356092 |
| ANKRD11   | -0.101022817 | 8.594683245 | 0.0103589   |
| ADAMTS13  | 0.048509814  | 6.121428649 | 0.010367659 |
| DNAI2     | -0.114393858 | 7.093678794 | 0.010375713 |
| REL       | -0.058331306 | 6.108929597 | 0.010382557 |
| C22ORF39  | 0.125935706  | 8.357253511 | 0.0103867   |
| CADM3     | -0.064668123 | 6.154778326 | 0.010390548 |
| MAP2K2    | -0.149774578 | 9.597129498 | 0.010414101 |
| PA2G4     | -0.178940991 | 8.517236201 | 0.010422914 |
| CHD1L     | -0.093245065 | 6.92426383  | 0.01046447  |
| ATP5F1    | 0.127822397  | 12.03975657 | 0.010464802 |
| FAM49A    | -0.067332279 | 6.317386314 | 0.010483767 |
| NARS      | 0.170057539  | 10.91942509 | 0.010502299 |
| FBXO5     | -0.068683579 | 6.282589421 | 0.010509649 |
| ZHX2      | 0.171697146  | 8.803123902 | 0.01051244  |
| LOC644538 | 0.096878451  | 6.174805727 | 0.010517439 |
| APPL2     | -0.115869946 | 8.147832932 | 0.01054458  |
| HIGD1B    | 0.164788641  | 8.385549215 | 0.01056103  |
| AFTPH     | 0.074412059  | 6.590733011 | 0.010563186 |
| RIPK5     | 0.181407357  | 7.595010448 | 0.010598475 |
| NOVA1     | 0.055311415  | 6.179459792 | 0.010608573 |
| DACT1     | 0.070536048  | 6.345537577 | 0.01061011  |
| CLCNKA    | 0.170597049  | 7.696728437 | 0.010632523 |
| KIAA1571  | 0.081251459  | 6.210948677 | 0.010638183 |
| PABPC5    | 0.042945034  | 6.036183563 | 0.010690545 |
| FTH1      | 0.191318543  | 10.43814552 | 0.01069586  |
| SPOP      | -0.125289751 | 9.59681891  | 0.010698635 |
| LGALS3BP  | -0.226934273 | 9.533062469 | 0.010700994 |
| PARK2     | 0.101320372  | 6.752386742 | 0.010705338 |
| CDC14A    | 0.03141318   | 6.129919866 | 0.010706883 |

## DEG.infomation

|           |              |             |             |
|-----------|--------------|-------------|-------------|
| LOC23117  | -0.179271967 | 8.195237577 | 0.010711209 |
| PPP2R1A   | 0.121993775  | 11.59248502 | 0.010716403 |
| GNB2L1    | -0.150398606 | 13.33337586 | 0.010736277 |
| ARSD      | 0.077688688  | 6.906486109 | 0.010742576 |
| LOC644251 | 0.133372363  | 6.416854993 | 0.010742972 |
| EXOSC1    | 0.084238437  | 8.343426417 | 0.010749569 |
| FLII      | -0.132803505 | 9.284850152 | 0.010749739 |
| PRKCI     | -0.098117839 | 6.953888637 | 0.010751401 |
| LMO2      | 0.168933923  | 7.702727976 | 0.010766683 |
| NF1       | 0.079557845  | 6.563852402 | 0.010774211 |
| LOC652493 | -0.177602318 | 6.594792526 | 0.01078236  |
| SLC44A4   | -0.157504593 | 11.08404569 | 0.010806339 |
| C16ORF53  | 0.115444409  | 7.677140986 | 0.010815055 |
| YES1      | -0.197659199 | 8.480931347 | 0.010816462 |
| GNAI1     | 0.075456459  | 6.515765026 | 0.01082837  |
| FLRT2     | 0.111126592  | 6.592098294 | 0.010828457 |
| NKIRAS2   | 0.09627804   | 7.078792448 | 0.010851936 |
| TMEM110   | -0.069539662 | 6.235241356 | 0.010852661 |
| PRKAB1    | -0.081733943 | 7.29850206  | 0.010871527 |
| PRTFDC1   | 0.148501891  | 6.860047612 | 0.010872989 |
| RBCK1     | -0.0844149   | 8.116166821 | 0.0108837   |
| CREB3     | -0.124271675 | 6.601213158 | 0.010930535 |
| TAZ       | 0.092650832  | 7.225967154 | 0.010932936 |
| ULK2      | 0.136409656  | 6.753525244 | 0.010935987 |
| LOC648710 | -0.075255316 | 6.082376148 | 0.010936655 |
| BRE       | 0.100254609  | 8.874664085 | 0.010968549 |
| PPP1R13B  | 0.166631586  | 10.19040176 | 0.010970382 |
| PLA2G4F   | -0.11063751  | 6.171790609 | 0.010972462 |
| RND3      | 0.201707571  | 9.214318183 | 0.010978257 |
| PSMA3     | -0.131466576 | 9.132041827 | 0.010994597 |
| ANKRD10   | -0.127638193 | 8.400612439 | 0.011034581 |
| PAIP1     | 0.04709927   | 6.345250602 | 0.011037196 |
| LCOR      | 0.134287991  | 7.765269549 | 0.011071038 |
| LRP1B     | 0.083239905  | 6.091412673 | 0.011078389 |
| RHOXF1    | 0.062892747  | 6.049957499 | 0.011078541 |
| FAM100B   | 0.110259766  | 7.106510337 | 0.011088313 |
| GANC      | -0.064251835 | 6.110050904 | 0.011095174 |
| LOC652479 | -0.088970901 | 6.233183183 | 0.011096268 |
| DNMT3B    | 0.032908053  | 6.258658168 | 0.011097328 |
| SLC5A7    | 0.068785124  | 6.03089785  | 0.011117284 |
| FN3K      | 0.073400749  | 6.465410464 | 0.011124806 |
| GCC1      | -0.099984049 | 7.75614519  | 0.011128621 |
| C11ORF82  | -0.077120726 | 6.149999992 | 0.011132088 |
| SOX9      | 0.217591644  | 8.23842884  | 0.011134834 |
| LOC441179 | 0.062152214  | 6.193712911 | 0.011155384 |
| PRPSAP2   | 0.08984547   | 8.040530376 | 0.011159572 |
| PI3       | -0.06902463  | 6.048537527 | 0.011171272 |
| ZNF251    | 0.060803357  | 6.45098116  | 0.011173325 |
| WSB1      | 0.145342609  | 8.654511179 | 0.011182766 |
| FRAP1     | -0.098592623 | 8.519187335 | 0.011199515 |
| MEN1      | -0.043248281 | 6.206680312 | 0.011205885 |

## DEG.infomation

|           |              |             |             |
|-----------|--------------|-------------|-------------|
| ATRIP     | -0.072466774 | 6.969424449 | 0.011211704 |
| TGFB3     | 0.19953826   | 8.34538971  | 0.011225361 |
| PAPOLG    | 0.069857396  | 6.448596264 | 0.011231918 |
| JAG1      | 0.156460085  | 8.274233813 | 0.011302266 |
| LOC644530 | 0.05812906   | 6.180433977 | 0.011306558 |
| KIF1B     | -0.115709152 | 8.648677459 | 0.011306803 |
| SORBS3    | -0.08061021  | 7.239847879 | 0.011314623 |
| EHMT1     | -0.040238135 | 6.203661214 | 0.011316567 |
| ASPA      | 0.079292201  | 6.120716749 | 0.011325303 |
| NOMO2     | -0.122623303 | 9.357761075 | 0.011331116 |
| CAST      | -0.202155831 | 9.378134342 | 0.011334052 |
| TMEM22    | -0.103966293 | 6.865642852 | 0.011343379 |
| LOC642578 | 0.055141727  | 6.045215033 | 0.011347848 |
| SERBP1    | -0.115087558 | 8.938577331 | 0.011358022 |
| SAR1B     | 0.109956868  | 8.952199401 | 0.011405091 |
| RPS17     | -0.121875868 | 12.73199923 | 0.011405483 |
| C16ORF62  | 0.076512498  | 6.553654134 | 0.011438147 |
| PRRT3     | 0.095617564  | 6.4313339   | 0.011474779 |
| COX6C     | 0.084303059  | 13.63555876 | 0.011476067 |
| UBE2I     | -0.090726768 | 8.706547383 | 0.011488583 |
| BPHL      | 0.154697395  | 9.007750777 | 0.011514981 |
| FLJ32154  | -0.060166559 | 5.953833176 | 0.01153243  |
| SH3BP1    | -0.068607164 | 6.194382651 | 0.011543393 |
| B3GNT6    | 0.155197734  | 8.384031598 | 0.011557394 |
| LOC150223 | -0.071392634 | 6.169933109 | 0.011569345 |
| RPRD1A    | 0.099813937  | 8.462222351 | 0.011597181 |
| LOC493869 | 0.206925139  | 7.444683693 | 0.011597284 |
| ID2       | 0.195485175  | 8.807321638 | 0.011601072 |
| LSM8      | 0.100767164  | 7.071003253 | 0.011607705 |
| PRDM16    | 0.053664593  | 6.337684333 | 0.011627107 |
| ZNF533    | 0.212430955  | 6.534987589 | 0.011659476 |
| PHKA1     | 0.094416775  | 7.104204625 | 0.01168007  |
| PSMA7     | -0.065152965 | 6.252593894 | 0.011704301 |
| AMDHD1    | -0.080787405 | 6.334581678 | 0.011710191 |
| TMSB4X    | -0.125480658 | 13.11100532 | 0.011712087 |
| PHIP      | 0.108973416  | 8.601339259 | 0.011733692 |
| ITPKA     | -0.163464112 | 6.871415084 | 0.011770793 |
| TWF1      | -0.056886996 | 6.261202456 | 0.011791182 |
| SFRS1     | -0.123060737 | 10.2589804  | 0.011800088 |
| TMED10    | -0.198198062 | 9.242811553 | 0.011816991 |
| RANBP3    | -0.059119436 | 7.487222874 | 0.011817093 |
| TMCO6     | -0.068329624 | 6.473380463 | 0.011823783 |
| RPLP2     | -0.100311186 | 14.1528484  | 0.011836337 |
| LOC642398 | 0.106550319  | 6.508000244 | 0.011846113 |
| NPFFR2    | 0.0474805    | 6.052408545 | 0.011876087 |
| SMAD3     | -0.1126427   | 7.837749298 | 0.01191328  |
| RNPEP     | -0.127303342 | 7.485402712 | 0.011927825 |
| NPTX1     | -0.036506955 | 5.947607567 | 0.011937534 |
| ZNF155    | 0.064822166  | 6.224986937 | 0.011942345 |
| LOC649711 | -0.068331218 | 6.179654506 | 0.011956424 |
| LOC649209 | -0.072508579 | 6.383016787 | 0.011979476 |

## DEG.infomation

|               |              |             |             |
|---------------|--------------|-------------|-------------|
| PDCD2L        | 0.100392093  | 7.489821253 | 0.011994403 |
| KCNG2         | -0.042825025 | 6.160663489 | 0.012006823 |
| POLE          | 0.084076475  | 6.732398191 | 0.012045359 |
| LOC644466     | 0.058705919  | 5.994106896 | 0.012052715 |
| GCK           | 0.046378822  | 6.086178232 | 0.012054587 |
| LOC645683     | -0.119639583 | 13.19763761 | 0.012059511 |
| GAPVD1        | -0.115194872 | 9.415811849 | 0.012063363 |
| LOC730360     | 0.06940986   | 6.201675202 | 0.012103619 |
| BUD13         | 0.080742321  | 7.038532488 | 0.012118048 |
| PPA2          | -0.125689834 | 10.34278854 | 0.012118769 |
| CA5B          | 0.100032759  | 6.49265196  | 0.012122084 |
| FBLN5         | -0.168091011 | 8.439070523 | 0.012143932 |
| LOC641710     | 0.070735069  | 6.533847399 | 0.012151312 |
| DNAJB1        | -0.20588337  | 8.198407292 | 0.01215312  |
| ETNK2         | -0.086346836 | 6.149207384 | 0.012156486 |
| C7ORF28A      | 0.081912976  | 7.268976124 | 0.012164134 |
| LOC646342     | -0.055812843 | 5.909974556 | 0.012176271 |
| SLC35C1       | -0.168358929 | 6.612886141 | 0.01218018  |
| FLJ20160      | -0.113794076 | 8.074673285 | 0.012188848 |
| ABO           | -0.058455635 | 6.026852303 | 0.012188962 |
| MTA3          | 0.078645109  | 8.023573395 | 0.012223142 |
| FCRL1         | 0.063698117  | 6.092391621 | 0.012247064 |
| WASF2         | -0.14425738  | 8.039303686 | 0.012260752 |
| GYG1          | -0.11651433  | 11.30570652 | 0.01228466  |
| ADRA2C        | -0.043613496 | 6.155457522 | 0.012294521 |
| RASGRP1       | 0.072998214  | 6.293161412 | 0.012298933 |
| SIM2          | -0.046230424 | 6.043605725 | 0.01231717  |
| GPR132        | -0.060947269 | 6.121779617 | 0.012354878 |
| CCNC          | 0.107771951  | 7.550788079 | 0.012382108 |
| C1ORF210      | 0.048344989  | 6.205904008 | 0.012422025 |
| TICAM2        | -0.116902488 | 7.314651529 | 0.012430451 |
| GP1BA         | 0.102003708  | 7.349276897 | 0.012431679 |
| ATP8B4        | -0.140815728 | 7.443967951 | 0.01245747  |
| MSTP9         | 0.073549588  | 6.413450814 | 0.012466918 |
| CCDC59        | 0.147301289  | 9.700518323 | 0.012494275 |
| GTF2A2        | 0.141229008  | 10.12771062 | 0.012501648 |
| AAA1          | 0.034469311  | 6.084934627 | 0.012507958 |
| POLM          | -0.085661055 | 6.900575899 | 0.012521674 |
| ZC3HAV1       | -0.10770398  | 7.393772357 | 0.012524014 |
| ASGR1         | -0.128118075 | 6.357696114 | 0.012528156 |
| DCTN5         | -0.169618784 | 8.282656875 | 0.01253742  |
| FANCD2        | -0.042128209 | 6.126553361 | 0.012543285 |
| KIAA1797      | 0.104023778  | 7.71225331  | 0.012543995 |
| ZCCHC8        | 0.09338964   | 7.246804761 | 0.012570047 |
| LOC645600     | -0.082082071 | 6.360982967 | 0.012571008 |
| DKFZP761P0423 | -0.116405046 | 7.283370754 | 0.012574062 |
| SAP30L        | -0.13916019  | 8.605782111 | 0.01257636  |
| ZBTB20        | 0.149658092  | 9.820113297 | 0.012580048 |
| MUSK          | -0.09784911  | 7.119069632 | 0.012606    |
| BAT5          | -0.090343746 | 8.12698244  | 0.012613863 |
| LOC648099     | -0.108017432 | 6.851215857 | 0.012622989 |

## DEG.infomation

|           |              |             |             |
|-----------|--------------|-------------|-------------|
| ANKRD43   | 0.05697341   | 6.100151751 | 0.012624737 |
| C1ORF26   | 0.14884511   | 6.382615627 | 0.012630499 |
| BBS5      | 0.041947867  | 6.129419955 | 0.012632611 |
| C9ORF58   | -0.140563743 | 7.279816709 | 0.012644009 |
| PTPN13    | 0.073922948  | 6.445816255 | 0.012661936 |
| LOC401052 | 0.08260399   | 6.890434795 | 0.012669429 |
| ZNF193    | -0.079018808 | 7.017898943 | 0.012675513 |
| CTCF      | 0.11164715   | 7.920008966 | 0.012681144 |
| FARSB     | -0.063099516 | 6.221783023 | 0.012685261 |
| AMDHD2    | -0.113781766 | 6.808524959 | 0.012702236 |
| OR51B2    | -0.058617447 | 5.986672397 | 0.012707429 |
| MLX       | -0.092329594 | 7.143149158 | 0.012717789 |
| S100A1    | 0.212476152  | 10.7624373  | 0.012720803 |
| MAGEA6    | 0.046473584  | 6.155806112 | 0.012722655 |
| MELK      | -0.064703095 | 6.077541997 | 0.012751843 |
| DOC2B     | -0.073162088 | 6.18473571  | 0.012793453 |
| FAM44B    | 0.111626304  | 9.815762511 | 0.012806038 |
| TMEM59    | 0.107081304  | 12.04746835 | 0.012815764 |
| PTGFR     | 0.070554021  | 6.130526183 | 0.012817456 |
| ERO1L     | -0.140701855 | 7.41915596  | 0.012828384 |
| LOC149837 | 0.068057449  | 6.319714402 | 0.012829164 |
| LOC400721 | -0.144025933 | 13.57093597 | 0.012878335 |
| N4BP1     | -0.082787802 | 6.846272443 | 0.012935439 |
| TCF12     | 0.091299348  | 7.684845262 | 0.012943315 |
| TGFBRAP1  | -0.128487474 | 6.95292144  | 0.012964309 |
| LOC652699 | 0.063445502  | 6.211576119 | 0.012968441 |
| LOC646900 | 0.176890264  | 7.732001898 | 0.012969289 |
| PRKCE     | -0.090490653 | 6.854485024 | 0.012983048 |
| LILRB1    | -0.143886014 | 11.01621548 | 0.012991034 |
| NEK8      | -0.063840936 | 6.164619955 | 0.012994606 |
| CBWD6     | -0.0555947   | 5.88860881  | 0.013010814 |
| EIF5      | -0.169958852 | 7.950086772 | 0.013020264 |
| GATC      | -0.081526563 | 6.266731762 | 0.013020583 |
| LOC347376 | 0.197101727  | 8.39094983  | 0.013023427 |
| LOXL4     | -0.274053471 | 7.137477499 | 0.013033381 |
| PCTP      | -0.077569294 | 6.874078881 | 0.013034404 |
| LOC730077 | 0.102262776  | 6.646112786 | 0.013039852 |
| CES4      | -0.060927875 | 6.115558784 | 0.013058936 |
| LOC642660 | 0.061536066  | 6.054357899 | 0.013070261 |
| METTL3    | 0.0895233    | 8.109768785 | 0.013073751 |
| FLJ32252  | -0.157242789 | 6.305645277 | 0.013094108 |
| C17ORF48  | 0.094934756  | 6.803543797 | 0.013102809 |
| SLC35E1   | -0.228329671 | 9.126599125 | 0.013128817 |
| SHC4      | 0.088663872  | 6.57774609  | 0.013149674 |
| EMX1      | -0.043526415 | 5.995013608 | 0.013154356 |
| C10ORF39  | 0.084592418  | 6.601454102 | 0.01321486  |
| CAPN7     | 0.081305891  | 7.221456598 | 0.013218178 |
| HSD17B11  | -0.116185737 | 7.277727788 | 0.013219652 |
| MDM2      | -0.031035333 | 6.011798434 | 0.013226173 |
| EPS15     | 0.095717445  | 7.850676874 | 0.013229001 |
| RPL27A    | -0.119066203 | 13.18449758 | 0.013233613 |



## DEG.infomation

|             |              |             |             |
|-------------|--------------|-------------|-------------|
| ZNF429      | 0.072791467  | 6.081550153 | 0.013238801 |
| ZNF607      | 0.042596877  | 6.252484112 | 0.013245325 |
| ABHD3       | -0.075754496 | 6.652456609 | 0.013251455 |
| LOC648494   | 0.13286364   | 6.91012883  | 0.013281077 |
| SYT4        | -0.07005871  | 5.963349269 | 0.013287973 |
| CSTB        | 0.130514068  | 10.98421001 | 0.013295498 |
| CENPE       | -0.045916398 | 6.136238365 | 0.013295593 |
| LIMK2       | -0.03417583  | 6.19180727  | 0.013308085 |
| SULT1A2     | 0.093208411  | 6.483704976 | 0.013326088 |
| APOOL       | -0.09071306  | 6.785337193 | 0.013371981 |
| RGS7BP      | 0.083038602  | 6.334212292 | 0.013385726 |
| DAD1        | -0.141153707 | 11.07266838 | 0.01339265  |
| RAB33A      | 0.145343846  | 6.515976227 | 0.013400977 |
| HNT         | 0.093891034  | 6.414254995 | 0.013402131 |
| SEC11C      | -0.186596211 | 8.196331574 | 0.013439818 |
| C8ORF31     | -0.061575111 | 6.10912226  | 0.013443299 |
| C16ORF90    | -0.047403219 | 6.016334644 | 0.013465492 |
| LOC653895   | 0.074055651  | 6.195226671 | 0.013466073 |
| C1ORF103    | -0.047876783 | 6.014757892 | 0.013470775 |
| CMAS        | 0.09698144   | 9.38033557  | 0.013518966 |
| FER         | -0.076511855 | 6.665413478 | 0.013526106 |
| DENND5B     | -0.174406949 | 8.871734551 | 0.013534302 |
| PSMD14      | -0.128040243 | 9.645892935 | 0.013535418 |
| ATP5A1      | 0.124923802  | 14.20401372 | 0.013576835 |
| FASTKD3     | 0.081445065  | 6.829571683 | 0.013579338 |
| LOC650706   | 0.066351582  | 5.997191886 | 0.01358365  |
| AHCTF1      | -0.069682594 | 7.487608915 | 0.013629952 |
| ASB1        | -0.201043248 | 9.075144027 | 0.01366572  |
| ZNF695      | -0.055272487 | 5.966885984 | 0.013673267 |
| RNF25       | 0.081373684  | 6.563879586 | 0.013692294 |
| LOC653214   | -0.059645862 | 5.981299748 | 0.013735897 |
| ASF1B       | -0.064878644 | 6.085881837 | 0.013746245 |
| FCHO1       | -0.066343231 | 6.083431695 | 0.013768363 |
| ARG1        | -0.065945726 | 5.999155505 | 0.013795922 |
| PCYT2       | 0.113406554  | 7.580773916 | 0.013806251 |
| C1ORF176    | -0.170362436 | 8.607499205 | 0.013809783 |
| CDC27       | 0.063914705  | 6.21207366  | 0.013820783 |
| CRAT        | 0.092134636  | 7.110667035 | 0.013820929 |
| CFLAR       | -0.136883871 | 10.12451451 | 0.013822582 |
| MYCBPAP     | 0.077715907  | 6.397147223 | 0.013826498 |
| PIGV        | 0.08190604   | 7.266451723 | 0.013894292 |
| DCDC5       | -0.067912469 | 6.426847227 | 0.013913649 |
| LSM1        | 0.128386475  | 11.5094549  | 0.01392849  |
| BNIP3L      | 0.112141604  | 7.950293149 | 0.013940562 |
| LOC389672   | -0.153462317 | 7.289745911 | 0.01395997  |
| LOC387934   | -0.282860152 | 7.826620612 | 0.014007823 |
| PSCA        | -0.058675627 | 6.134091626 | 0.014040334 |
| METTL10     | 0.047580552  | 6.281565446 | 0.014094246 |
| CLK2        | 0.053692696  | 7.136253622 | 0.014102221 |
| PPAN-P2RY11 | -0.077073518 | 6.295546673 | 0.014103968 |
| PNPLA2      | 0.169133091  | 9.245527445 | 0.014110475 |

## DEG.infomation

|               |              |             |             |
|---------------|--------------|-------------|-------------|
| FRMD6         | 0.095989207  | 7.130965366 | 0.014141836 |
| C1ORF152      | 0.063678556  | 6.337264656 | 0.014147484 |
| L3MBTL        | 0.03942598   | 6.10467292  | 0.014156935 |
| RAC1          | -0.091576894 | 9.988043173 | 0.014157578 |
| THSD1         | 0.048814747  | 6.242076544 | 0.014158081 |
| SDK1          | -0.050431074 | 6.120593892 | 0.014175705 |
| GALNTL1       | -0.227407119 | 9.437799287 | 0.014186184 |
| LOC642771     | -0.077681354 | 6.436730283 | 0.014189458 |
| ITGA11        | -0.11073687  | 6.660245125 | 0.014206791 |
| C4ORF32       | 0.155648204  | 7.353858091 | 0.014248782 |
| UBE2F         | -0.140297336 | 10.70762849 | 0.014256465 |
| LOC642787     | 0.066337889  | 6.383244992 | 0.0143171   |
| C7ORF55       | 0.174382641  | 9.403640624 | 0.014318525 |
| KIF1C         | 0.223923557  | 8.672346005 | 0.014337672 |
| ZNF713        | 0.046036475  | 6.397875519 | 0.014338181 |
| C19ORF48      | -0.060526902 | 6.714990297 | 0.014341401 |
| KIAA0323      | -0.10351671  | 7.040905175 | 0.014341602 |
| CACNA2D3      | -0.089560937 | 6.329930448 | 0.014350473 |
| FAHD1         | -0.143928579 | 7.96448312  | 0.014372564 |
| SLC35A4       | -0.10660674  | 8.815045108 | 0.014387589 |
| ANKRD54       | 0.096341387  | 7.44123476  | 0.014389965 |
| TOR2A         | -0.057686835 | 6.045840029 | 0.014422074 |
| TLR1          | -0.099351221 | 6.30543417  | 0.014431613 |
| RNF208        | 0.059157247  | 6.241625755 | 0.014440097 |
| ZNF347        | 0.062142666  | 6.359239776 | 0.014457668 |
| BSG           | 0.19995124   | 11.23279044 | 0.014474701 |
| PRSS27        | -0.059653305 | 6.105841176 | 0.014475307 |
| ORAI2         | -0.059553235 | 6.080744006 | 0.014483948 |
| GCAT          | -0.173882162 | 8.899440623 | 0.01449817  |
| RHOBTB2       | -0.107680411 | 7.114216578 | 0.014508784 |
| LOC440132     | -0.068650253 | 6.065411104 | 0.014511866 |
| MDN1          | 0.082362645  | 6.53898326  | 0.014524404 |
| LRRC55        | -0.064975989 | 6.010431892 | 0.01453076  |
| LOC645466     | 0.160933758  | 7.739540469 | 0.014543595 |
| ANKH          | 0.076974465  | 6.186069633 | 0.014549922 |
| ZNF294        | 0.089319364  | 7.559965274 | 0.014564147 |
| IL2RG         | -0.058861486 | 5.96509359  | 0.014580228 |
| GUF1          | 0.114065485  | 7.28641214  | 0.014594577 |
| ZNF202        | -0.07813002  | 6.278519675 | 0.014599747 |
| DLEU1         | -0.09824756  | 7.323382874 | 0.014614897 |
| RANBP2L1      | 0.074465578  | 6.181077706 | 0.014625697 |
| LEAP-2        | 0.063763135  | 6.123439799 | 0.014646511 |
| RP11-529I10.4 | 0.10991588   | 7.984823174 | 0.014648369 |
| LOC644012     | 0.074629934  | 6.264408184 | 0.01465616  |
| RPESP         | -0.12896953  | 6.587808927 | 0.014666057 |
| POFUT1        | -0.151900447 | 9.216087262 | 0.014677931 |
| BSN           | 0.072309112  | 6.323834803 | 0.014687571 |
| TMEM219       | 0.13693454   | 9.321836432 | 0.014690142 |
| COX7B         | 0.112860819  | 12.45995204 | 0.014704888 |
| TMSB4Y        | 0.123529492  | 6.157247863 | 0.014709165 |
| TNFAIP8L2     | -0.05325717  | 6.069545411 | 0.014727525 |

## DEG.infomation

|           |              |             |             |
|-----------|--------------|-------------|-------------|
| LOC644380 | 0.072191552  | 6.257166932 | 0.014728873 |
| LOC441087 | -0.181730448 | 12.84825778 | 0.014734728 |
| LOC652404 | 0.06322106   | 6.106219841 | 0.014738375 |
| PGM5      | 0.115057135  | 10.75846479 | 0.014767145 |
| FOXP1     | 0.080407723  | 6.327531489 | 0.014777889 |
| DCTN3     | 0.111858655  | 9.908479882 | 0.01477931  |
| RASGEF1C  | -0.038891546 | 6.077909165 | 0.014788555 |
| RGS3      | 0.033793982  | 6.182140288 | 0.014796385 |
| MEF2D     | 0.129228271  | 9.373553696 | 0.014825561 |
| LOC646304 | 0.057402024  | 6.239670137 | 0.014867847 |
| SOD3      | 0.125976422  | 6.855209352 | 0.014880993 |
| CHPT1     | -0.151844702 | 9.816723752 | 0.014892571 |
| TPK1      | -0.080539353 | 6.844806736 | 0.014895972 |
| ACPP      | -0.063293638 | 5.986756901 | 0.014897486 |
| XPA       | 0.085788987  | 6.322579737 | 0.01491415  |
| LOC554208 | 0.115027837  | 7.05292962  | 0.0149162   |
| KIF2A     | -0.093450453 | 6.824308485 | 0.01492667  |
| LOC651723 | 0.048311032  | 6.085046664 | 0.014952044 |
| KIAA0664  | 0.163588936  | 9.121902722 | 0.014952557 |
| GOLPH3L   | 0.090891387  | 7.086611159 | 0.014973737 |
| C9ORF5    | 0.133215097  | 9.813169431 | 0.015012047 |
| HIST1H2BL | 0.068343799  | 5.983636374 | 0.015025235 |
| ZC3H12A   | -0.105220636 | 6.424461967 | 0.01503632  |
| NTRK2     | 0.064215538  | 6.322560347 | 0.015041735 |
| KIAA1199  | 0.141401924  | 6.249486983 | 0.015073571 |
| PRRG4     | -0.086541385 | 6.641425726 | 0.015083288 |
| DEFB118   | 0.063431203  | 6.150040073 | 0.015083619 |
| GPR177    | 0.113274636  | 8.704356798 | 0.015084409 |
| DUSP11    | 0.068039891  | 7.569238851 | 0.015094534 |
| LOC653227 | 0.060503903  | 6.057275267 | 0.01510677  |
| KCNH3     | 0.063769592  | 6.200709425 | 0.015119996 |
| SLC6A19   | 0.068376592  | 5.979317342 | 0.015137772 |
| KREMEN1   | 0.064479313  | 6.679255778 | 0.0151562   |
| FAM160A2  | 0.099644731  | 7.643581473 | 0.015161807 |
| LOC440396 | 0.049491629  | 6.203112784 | 0.015161987 |
| SQRDL     | -0.106797357 | 7.194768903 | 0.015162882 |
| HAX1      | 0.119929525  | 9.150264065 | 0.015185519 |
| HIBADH    | 0.153043996  | 10.62077625 | 0.015188595 |
| RTP4      | 0.095752629  | 6.594756093 | 0.01519816  |
| VCP1P1    | 0.070217245  | 7.699074717 | 0.015207776 |
| C17ORF74  | 0.074505784  | 6.529592665 | 0.015209714 |
| LASS1     | 0.060952104  | 6.188661409 | 0.015243346 |
| LOC642113 | -0.163029414 | 6.500070467 | 0.015245094 |
| CLTCL1    | 0.095982226  | 6.415437286 | 0.015254335 |
| MAP3K12   | 0.118329073  | 6.33233416  | 0.015261335 |
| RBM25     | 0.10725185   | 9.119620486 | 0.015270724 |
| LOC653748 | 0.038721881  | 5.990898442 | 0.015279153 |
| LOC220729 | 0.056141399  | 6.356114522 | 0.015296386 |
| CBX2      | 0.060737729  | 6.610506461 | 0.015297867 |
| PANX1     | -0.132583142 | 6.928947868 | 0.015303531 |
| MCART1    | -0.197771497 | 10.8111796  | 0.015314111 |

## DEG.infomation

|           |              |             |             |
|-----------|--------------|-------------|-------------|
| ALDH18A1  | -0.111714174 | 7.343947582 | 0.015319029 |
| SUDS3     | 0.080713189  | 6.37089064  | 0.015374169 |
| C1QTNF2   | 0.065208996  | 6.203049845 | 0.015401222 |
| UQCRH     | 0.10624302   | 12.69209553 | 0.015414995 |
| KNTC1     | -0.087455259 | 6.661234262 | 0.01543604  |
| ZFX       | 0.124185252  | 7.069474733 | 0.01543988  |
| LOC728069 | -0.139507454 | 6.803519977 | 0.015443678 |
| KIRREL    | -0.070770957 | 6.107028194 | 0.015468846 |
| ATP7A     | 0.074350459  | 6.444986812 | 0.015477836 |
| ATF7IP    | 0.060254589  | 6.187466546 | 0.01548019  |
| PDCD1     | -0.091357734 | 6.149519591 | 0.015484634 |
| MYH14     | 0.079748042  | 6.661084121 | 0.015487342 |
| EPS15L1   | 0.100798448  | 7.521303    | 0.015492587 |
| ITGAL     | -0.075329857 | 6.219941071 | 0.015497586 |
| RFC3      | 0.048044231  | 6.446442425 | 0.015528332 |
| LOC81691  | 0.101514521  | 7.227839824 | 0.015545728 |
| LOC651407 | 0.062590876  | 6.137860279 | 0.015548227 |
| FAM36A    | 0.178890057  | 8.126933907 | 0.015574847 |
| FAM80B    | 0.075760779  | 6.487481189 | 0.015607476 |
| THEM4     | 0.102442824  | 6.471218889 | 0.015665649 |
| GMPR      | 0.185805836  | 8.583534519 | 0.015679156 |
| SLC44A5   | 0.062463089  | 6.050326634 | 0.015699364 |
| DDR2      | 0.099059782  | 6.829016577 | 0.015699481 |
| ATP6V1G1  | 0.1181086    | 10.88393969 | 0.01574875  |
| SH2D1A    | 0.106371984  | 7.247900786 | 0.015755698 |
| RPS6KA5   | 0.108428782  | 6.802460441 | 0.015759432 |
| ZFAND2B   | -0.111759967 | 8.31633063  | 0.015762646 |
| TWIST2    | -0.039425834 | 6.161298601 | 0.015804592 |
| LAT       | -0.034199159 | 6.134375842 | 0.015804722 |
| MRPL39    | 0.131409027  | 8.891541026 | 0.015808157 |
| SLC12A8   | -0.065469712 | 6.23236778  | 0.015822546 |
| CCDC102B  | 0.072074381  | 6.048634078 | 0.015825071 |
| FBXO16    | 0.063862978  | 6.111339021 | 0.015831392 |
| HSD11B1L  | 0.052896966  | 6.667999071 | 0.015834494 |
| FAM76B    | 0.101230777  | 6.804568127 | 0.01583551  |
| RDH16     | 0.065818745  | 6.064731294 | 0.015843282 |
| OTUD7A    | -0.044070248 | 6.132532851 | 0.015854226 |
| CCL24     | -0.057553547 | 5.905469904 | 0.015855818 |
| AKAP7     | 0.100210284  | 6.971620954 | 0.015860967 |
| KIAA0101  | -0.10599052  | 12.51927106 | 0.015865349 |
| WDR5B     | 0.066714406  | 6.221610311 | 0.015866395 |
| LOC644268 | -0.057955824 | 5.947631792 | 0.015907538 |
| LOC652623 | 0.07551969   | 6.206737147 | 0.015914652 |
| ANAPC7    | -0.095719996 | 6.756951356 | 0.015945357 |
| RAP1A     | 0.070711373  | 6.719424389 | 0.015958115 |
| RBM9      | -0.125737035 | 8.535536316 | 0.01598226  |
| PCBP4     | 0.076042607  | 7.668456466 | 0.016010259 |
| DKK4      | -0.068284851 | 5.986467339 | 0.016016618 |
| CNN3      | -0.145484043 | 10.68518192 | 0.016037901 |
| LOC645070 | 0.058903281  | 6.113664534 | 0.016063002 |
| FALZ      | 0.072405448  | 6.275058886 | 0.016108884 |

## DEG.infomation

|           |              |             |             |
|-----------|--------------|-------------|-------------|
| HIAT1     | -0.087654433 | 7.015109636 | 0.016114172 |
| GABARAP   | 0.126819341  | 7.434936373 | 0.016125416 |
| HNRNPF    | -0.08459626  | 6.592780001 | 0.016153886 |
| TMED10P   | -0.106505377 | 11.40020666 | 0.016158798 |
| IL6ST     | -0.05958788  | 6.162571214 | 0.016161534 |
| MMAB      | 0.063463256  | 6.554139816 | 0.016182552 |
| SNRPG     | -0.131243592 | 11.99614847 | 0.016183601 |
| SNPH      | -0.120652091 | 6.209924539 | 0.016207026 |
| CCDC97    | 0.089095633  | 7.446729636 | 0.016207785 |
| PROM2     | 0.084652903  | 6.378097636 | 0.016240845 |
| GDPD3     | 0.061690178  | 6.134210842 | 0.016250109 |
| NT5C3L    | -0.107328243 | 7.984924148 | 0.016261986 |
| CLDND1    | -0.098926516 | 9.68539169  | 0.016262202 |
| ZBTB46    | 0.093006204  | 7.562385616 | 0.016275314 |
| LAIR2     | -0.052950809 | 6.246117126 | 0.0163203   |
| FTHL12    | -0.17299953  | 11.46820509 | 0.016324771 |
| LOC653803 | 0.076547783  | 6.311983926 | 0.016334271 |
| DSC2      | 0.11984775   | 8.268823015 | 0.016339752 |
| LILRB3    | -0.144040936 | 12.49168081 | 0.016340538 |
| RAD51L3   | 0.045497781  | 6.341796965 | 0.016368126 |
| SVOP      | 0.144006913  | 6.542591311 | 0.016369128 |
| LOC649775 | 0.059700182  | 6.018120438 | 0.016390588 |
| LOC220686 | -0.090573652 | 7.287136136 | 0.016398882 |
| DDX28     | 0.149726322  | 7.973221943 | 0.016411417 |
| TMEM134   | 0.125769034  | 9.376491462 | 0.016436461 |
| C19ORF56  | 0.164517823  | 10.43816945 | 0.016439001 |
| SYNPR     | 0.072717319  | 5.97862933  | 0.016449581 |
| USP9Y     | 0.202892537  | 6.469325541 | 0.016469195 |
| SLC13A1   | -0.044885664 | 6.094554288 | 0.016496406 |
| HBXIP     | 0.102561357  | 11.05126303 | 0.016502995 |
| BTG1      | -0.12411374  | 10.88633064 | 0.016504134 |
| MRPS17    | -0.10307681  | 9.519124368 | 0.016534083 |
| GPC4      | -0.18708554  | 7.395979173 | 0.016589913 |
| PUS7L     | 0.082575648  | 6.552518154 | 0.016599085 |
| OR3A4     | 0.1021882    | 7.518439893 | 0.016599351 |
| SELM      | -0.174325251 | 9.139490014 | 0.016640418 |
| TAF7L     | -0.058202251 | 5.883435934 | 0.016680923 |
| KRT19     | -0.075525278 | 6.001605662 | 0.016681039 |
| METTL2A   | 0.057076745  | 6.441072559 | 0.016683241 |
| SHROOM2   | 0.070108769  | 6.498398308 | 0.016683805 |
| GBP5      | -0.087886874 | 6.191587175 | 0.016698244 |
| CECR1     | 0.263271452  | 8.729103511 | 0.016698858 |
| NDUFA11   | 0.106840254  | 12.12455446 | 0.016730448 |
| COMMD5    | -0.063539898 | 7.790430917 | 0.01673061  |
| LOC727825 | -0.110238873 | 7.568845983 | 0.016741904 |
| PLA2G2D   | -0.118573024 | 7.224424412 | 0.016755507 |
| MED24     | 0.107119629  | 8.026176223 | 0.016795396 |
| C17ORF28  | 0.07211043   | 6.529358829 | 0.016798516 |
| LOC646483 | -0.14669455  | 11.54740793 | 0.016808268 |
| CDRT4     | -0.074059629 | 6.819899831 | 0.016809348 |
| PSG6      | -0.034656763 | 6.04688442  | 0.016821283 |

## DEG.infomation

|              |              |             |             |
|--------------|--------------|-------------|-------------|
| SLC24A1      | 0.071354475  | 6.433549608 | 0.016832431 |
| CD8A         | -0.065560745 | 6.213068356 | 0.016857055 |
| ACTR3        | -0.231402103 | 8.594275351 | 0.016879357 |
| LOC650885    | 0.066222943  | 6.296778484 | 0.016891029 |
| FSD1CL       | 0.081482251  | 6.151658343 | 0.016910811 |
| ABI3BP       | 0.229023352  | 7.828300676 | 0.016918265 |
| GBE1         | -0.166456303 | 9.935564674 | 0.01692468  |
| MRPS24       | -0.115199835 | 10.94351477 | 0.016928128 |
| NCOR1        | 0.079697986  | 7.089004919 | 0.016930948 |
| NLRP12       | -0.045233808 | 5.986098266 | 0.016966637 |
| CPVL         | 0.175715818  | 10.92030848 | 0.016984638 |
| MAP2K4       | -0.077739202 | 7.708571238 | 0.016998303 |
| OSBPL11      | -0.117886253 | 7.115884991 | 0.01701657  |
| HDDC3        | 0.103597254  | 7.777525998 | 0.01701958  |
| CCDC137      | -0.064751751 | 6.244980359 | 0.017027331 |
| LOC653071    | 0.210852155  | 7.723681243 | 0.017027504 |
| MGC48637     | 0.04424901   | 6.125561113 | 0.017066086 |
| ZBTB5        | 0.080469461  | 7.04983677  | 0.017067062 |
| TRIM16L      | 0.0885942    | 6.193928267 | 0.017067583 |
| PEX5         | -0.126286885 | 10.06086975 | 0.017077517 |
| C19ORF41     | -0.053106561 | 5.974070819 | 0.01708136  |
| MYPN         | 0.195012971  | 9.960655834 | 0.017100728 |
| LOC651816    | -0.142632861 | 8.199933971 | 0.017106316 |
| FAM130A2     | 0.102075466  | 6.401732222 | 0.01713204  |
| SFRS10       | -0.16727769  | 9.287233993 | 0.017132541 |
| C19ORF39     | 0.065993678  | 6.356529075 | 0.01714803  |
| SLC6A12      | 0.059890904  | 6.278208222 | 0.017153532 |
| ZBTB45       | -0.129982136 | 7.127058702 | 0.017189026 |
| PRPS1L1      | -0.041807731 | 6.155890407 | 0.017195877 |
| THOC1        | 0.086626224  | 7.852068461 | 0.017207437 |
| KLHL23       | -0.084519018 | 6.529595142 | 0.01723271  |
| SSBP4        | -0.086534887 | 7.260560457 | 0.017245034 |
| DENND1A      | 0.049300669  | 6.510388056 | 0.01725735  |
| CCBE1        | -0.191185474 | 8.211759677 | 0.017278875 |
| PCDHB8       | -0.06226339  | 5.993727415 | 0.01729021  |
| LOC645004    | -0.047404052 | 5.924860341 | 0.017301723 |
| TMED1        | -0.105145791 | 9.270369426 | 0.017306794 |
| NKX1-2       | -0.06328964  | 5.970151432 | 0.0173536   |
| SLC38A4      | -0.061968555 | 6.023590429 | 0.017410781 |
| PGM2         | -0.097239977 | 7.09392452  | 0.017411269 |
| MCART2       | 0.046319755  | 5.982266343 | 0.017420892 |
| C5ORF33      | 0.118745966  | 7.15655572  | 0.01743287  |
| LOC387882    | 0.113237163  | 6.381475932 | 0.017439528 |
| SPEF2        | 0.048618639  | 6.096629524 | 0.017448302 |
| LOC653338    | 0.058781564  | 6.061131003 | 0.017481494 |
| WFIKKN1      | 0.062665686  | 5.94275806  | 0.017493439 |
| PDLIM3       | -0.29715099  | 10.99368441 | 0.017494715 |
| LOC730031    | 0.070226956  | 6.362937013 | 0.017505875 |
| TTC39C       | -0.06557741  | 6.364488251 | 0.017506454 |
| IGFBP2       | -0.300867748 | 8.686723699 | 0.017514287 |
| DKFZP564J102 | 0.100843004  | 6.749770961 | 0.017517991 |

## DEG.infomation

|           |              |             |             |
|-----------|--------------|-------------|-------------|
| LOC643821 | 0.047907659  | 5.98302882  | 0.017539475 |
| CENTD2    | 0.08857046   | 6.556418381 | 0.017554258 |
| TBC1D3B   | -0.04005795  | 6.12162878  | 0.017555597 |
| MIA3      | -0.045223484 | 6.271045582 | 0.017558738 |
| LOC202181 | -0.041863173 | 6.123826362 | 0.017571592 |
| CCDC74B   | -0.055512907 | 6.042502295 | 0.01759736  |
| TNFRSF9   | -0.07421819  | 6.147506899 | 0.017602647 |
| TFPI2     | -0.088192057 | 6.213794171 | 0.017663559 |
| STK35     | -0.158747654 | 6.78368056  | 0.017670269 |
| TDP1      | -0.141448519 | 8.486251702 | 0.017707749 |
| BBS10     | 0.151845954  | 6.520120167 | 0.017711337 |
| SLC6A15   | 0.043547031  | 6.214359705 | 0.017718287 |
| USP5      | 0.102925049  | 9.650064912 | 0.017745616 |
| FRMD7     | 0.078889544  | 6.033101359 | 0.017752333 |
| CISD2     | 0.085735555  | 7.084170693 | 0.017756498 |
| C11ORF87  | -0.057054948 | 6.037307306 | 0.017786098 |
| THAP2     | 0.045629795  | 6.235027019 | 0.017789292 |
| PSMC1     | 0.075843431  | 12.05310255 | 0.017794702 |
| LOC613037 | -0.197983146 | 9.935817293 | 0.01781171  |
| OR2L13    | -0.048001343 | 6.006519751 | 0.017814657 |
| MS4A14    | -0.055274704 | 6.234788831 | 0.017841512 |
| HUS1B     | 0.073447102  | 6.847063263 | 0.017848188 |
| MRPS11    | 0.094563801  | 9.850318307 | 0.017860398 |
| HLCS      | -0.045249353 | 6.337081946 | 0.017874735 |
| KCTD3     | -0.07256661  | 8.01277396  | 0.017882671 |
| CCDC106   | -0.165659904 | 8.918774208 | 0.017953764 |
| MORN2     | 0.117424227  | 7.981371078 | 0.017973731 |
| GTPBP2    | -0.060388214 | 6.403939516 | 0.018046789 |
| LRRC14    | -0.080441356 | 7.419596594 | 0.018053996 |
| ADRB1     | -0.175993352 | 6.848132698 | 0.018060333 |
| TDRD3     | 0.087463992  | 6.802620081 | 0.018077115 |
| LOC650263 | 0.069012951  | 6.044860709 | 0.018110577 |
| LOC728715 | -0.094035614 | 6.554663718 | 0.018113389 |
| LOC645058 | 0.141415041  | 11.12703713 | 0.018130801 |
| NDUFA7    | 0.113437993  | 10.31760191 | 0.01813877  |
| TBC1D17   | 0.113051698  | 6.988799026 | 0.018190853 |
| TLK1      | 0.121507624  | 7.371980188 | 0.018197187 |
| MORC3     | 0.081097829  | 6.768580939 | 0.018213304 |
| C7ORF57   | 0.059298191  | 6.060603904 | 0.018256252 |
| COX11P    | 0.057223843  | 6.218362438 | 0.018293265 |
| IL15      | -0.049889722 | 6.516867215 | 0.018299378 |
| SUCLG2    | 0.12467463   | 10.37586882 | 0.018329676 |
| ARMETL1   | 0.091331272  | 6.569972878 | 0.018364101 |
| FBXO22    | 0.056581863  | 6.807445727 | 0.018370083 |
| BMP5      | -0.145764901 | 6.559159338 | 0.018378353 |
| RRP1B     | -0.07615248  | 6.570680117 | 0.018379193 |
| FLJ39061  | 0.041886904  | 6.156499334 | 0.01839096  |
| LOC606495 | 0.062829863  | 6.170835629 | 0.018399769 |
| CCL18     | -0.082922214 | 5.99246645  | 0.018437962 |
| OR2B2     | 0.067385995  | 6.377082624 | 0.01846316  |
| FAM131C   | -0.047971911 | 6.224378212 | 0.018463376 |

## DEG.infomation

|           |              |             |             |
|-----------|--------------|-------------|-------------|
| UBAP2L    | 0.196074025  | 7.787967121 | 0.01847516  |
| NOLA3     | -0.106342133 | 11.22381075 | 0.01847851  |
| IRS1      | 0.115988224  | 7.314338817 | 0.018499885 |
| EHD4      | -0.139804922 | 9.893456535 | 0.018538287 |
| PRSS35    | 0.073189265  | 6.59215996  | 0.018540095 |
| LRFN5     | -0.066495791 | 6.182369892 | 0.018580458 |
| LOC646766 | -0.133753445 | 11.8712084  | 0.018600626 |
| LOC652607 | 0.056639097  | 6.078001166 | 0.018606186 |
| LY6G5B    | -0.057189763 | 6.022660038 | 0.018626523 |
| SRRM2     | -0.134137353 | 10.6386801  | 0.018694283 |
| SAMD14    | 0.076958491  | 6.584154474 | 0.018710064 |
| USP2      | -0.105005192 | 6.932231347 | 0.018710087 |
| WBSCR16   | 0.062233719  | 6.846824059 | 0.018760036 |
| IPP       | 0.140851615  | 6.986874457 | 0.01877327  |
| KIF20A    | -0.082533007 | 6.128075012 | 0.018789116 |
| LOC653344 | 0.12083407   | 7.787770731 | 0.018794229 |
| SNORD55   | -0.08181533  | 6.222179533 | 0.018807672 |
| SOX7      | 0.136845336  | 7.407360174 | 0.018810657 |
| OSBPL8    | -0.12207515  | 7.479889822 | 0.018824555 |
| GGCT      | -0.102971049 | 7.643925368 | 0.018828259 |
| LOC644075 | 0.075664002  | 6.042397755 | 0.018828381 |
| POLG2     | 0.135319751  | 6.516689527 | 0.018854477 |
| RCP9      | -0.184668233 | 9.224819557 | 0.018859361 |
| ZNF185    | -0.066045499 | 6.497393834 | 0.018885785 |
| GLT6D1    | -0.067283799 | 6.108483199 | 0.018888106 |
| RASSF6    | -0.04205803  | 6.362733483 | 0.018908487 |
| LOC653108 | 0.134576994  | 7.084958851 | 0.018919626 |
| LOC645983 | 0.050070357  | 6.001504574 | 0.018922893 |
| CLMN      | -0.066464395 | 6.252226325 | 0.01896104  |
| HHLA3     | 0.042031397  | 6.122217143 | 0.018978376 |
| KCNK17    | 0.100587544  | 6.396188507 | 0.018998762 |
| PRPF6     | -0.085299588 | 6.601626294 | 0.019014826 |
| PISD      | -0.118345871 | 7.236346229 | 0.019022794 |
| CGI-96    | -0.09453889  | 6.471721749 | 0.019044731 |
| CRHBP     | 0.071916372  | 6.398267375 | 0.019046226 |
| APC       | 0.08478829   | 6.166170388 | 0.019055189 |
| SAFB2     | -0.128567623 | 8.401778181 | 0.019062963 |
| GNB2      | -0.117896518 | 7.089605595 | 0.019084019 |
| LOC647596 | -0.059717841 | 6.061299012 | 0.019096631 |
| MTA1      | 0.155996018  | 10.27232028 | 0.019115118 |
| GEN1      | 0.040985912  | 6.12051408  | 0.019126939 |
| TBL1X     | -0.104078474 | 8.253532651 | 0.019136106 |
| NFYA      | 0.049148674  | 6.265311771 | 0.019137201 |
| CITED4    | -0.172654539 | 8.395718882 | 0.019165542 |
| PAP2D     | 0.051297932  | 6.008978246 | 0.019167084 |
| MGC62100  | 0.068459977  | 6.225670924 | 0.019184185 |
| NAPRT1    | 0.128692153  | 8.91125536  | 0.019202705 |
| VPS13C    | 0.096703236  | 6.853523773 | 0.019227041 |
| INHBE     | 0.102647919  | 6.016948482 | 0.019234677 |
| LOC134145 | 0.069592424  | 6.091471676 | 0.019274064 |
| ACCN2     | -0.046761685 | 6.26096331  | 0.019286665 |



## DEG.infomation

|           |              |             |             |
|-----------|--------------|-------------|-------------|
| IL10      | -0.173014769 | 9.548465952 | 0.019295125 |
| HCN3      | -0.05862619  | 6.351200861 | 0.019304352 |
| PDCD7     | -0.110125075 | 12.41882336 | 0.01934512  |
| C14ORF11  | 0.097423174  | 6.217203183 | 0.019347822 |
| LOC642559 | -0.059931371 | 6.139543774 | 0.019378316 |
| DNCL1     | 0.170430992  | 11.40494762 | 0.019382912 |
| SSH3      | 0.087075764  | 7.055912167 | 0.01940514  |
| EIF2AK2   | 0.122022856  | 8.956127264 | 0.019415917 |
| UGCGL2    | -0.081835515 | 7.751560565 | 0.019417865 |
| RPS6KA6   | -0.093644831 | 6.425117609 | 0.019419856 |
| POPDC3    | 0.13198275   | 8.052773284 | 0.019431017 |
| RNF6      | -0.053572862 | 6.263712585 | 0.019466677 |
| GATS      | -0.141909952 | 7.244922458 | 0.019472554 |
| ZNF770    | 0.082588338  | 8.438211588 | 0.019501212 |
| PVT1      | -0.050997584 | 6.00964267  | 0.019522322 |
| NACAP1    | -0.133779496 | 6.469863713 | 0.019548042 |
| C1ORF41   | 0.111024773  | 7.862588255 | 0.019553375 |
| B3GNT5    | -0.073759527 | 6.126413036 | 0.019560019 |
| TMEM170A  | 0.14515168   | 7.04487947  | 0.019572122 |
| SHB       | 0.127521286  | 7.624661907 | 0.019586814 |
| ZNF420    | 0.082286732  | 6.183590105 | 0.019589566 |
| C9ORF95   | 0.159024965  | 7.300567431 | 0.01961127  |
| DTWD2     | -0.185956969 | 8.943483704 | 0.019614177 |
| SEC14L5   | 0.332819662  | 7.808899068 | 0.019618452 |
| MTCH2     | 0.087458036  | 6.794045661 | 0.019621151 |
| ARSB      | 0.086325358  | 6.854061754 | 0.0197517   |
| SLC10A7   | -0.036913272 | 6.22056702  | 0.019796735 |
| C2ORF47   | 0.121426383  | 9.485189231 | 0.019819019 |
| GZMK      | -0.078221425 | 6.200855947 | 0.019837479 |
| SRGAP2    | 0.069173068  | 6.910849389 | 0.019842987 |
| HNRPH1    | -0.126240823 | 7.520437295 | 0.019857814 |
| TMEM69    | 0.147563832  | 8.566086372 | 0.019873074 |
| IFRD1     | 0.181513886  | 7.636626532 | 0.019874748 |
| ILVBL     | -0.122506152 | 9.689191712 | 0.019897031 |
| LAMB3     | -0.058350952 | 6.357564488 | 0.019986988 |
| LOC643652 | 0.05585469   | 6.067401819 | 0.020004857 |
| LRRC8C    | -0.101031039 | 6.565983231 | 0.020016863 |
| WDR79     | -0.116076715 | 6.696704111 | 0.020022137 |
| FFAR2     | -0.052681664 | 6.096324461 | 0.020026107 |
| ABI2      | 0.052666872  | 7.114610153 | 0.020044921 |
| C19ORF33  | -0.186283332 | 6.756606214 | 0.020059133 |
| LOC641926 | -0.073443628 | 6.070828416 | 0.020092409 |
| MRPL47    | 0.122027433  | 8.413357871 | 0.020110867 |
| CDC14C    | 0.078396317  | 6.312493731 | 0.020119523 |
| LOC646434 | 0.057857883  | 6.28776894  | 0.02014391  |
| PIM3      | -0.091351448 | 6.823132228 | 0.020157497 |
| C22ORF26  | 0.05911827   | 6.124777822 | 0.020170927 |
| ENO3      | 0.173510937  | 12.86883267 | 0.020171973 |
| LOC653269 | 0.052183551  | 6.084237884 | 0.020191232 |
| MAGEF1    | -0.110507484 | 6.914074252 | 0.020208377 |
| UCP3      | 0.072300083  | 6.314409821 | 0.020231674 |

## DEG.infomation

|           |              |             |             |
|-----------|--------------|-------------|-------------|
| MCM10     | -0.048378744 | 6.079905637 | 0.020235259 |
| MCM8      | -0.159024535 | 9.595751611 | 0.020247288 |
| CLDN5     | -0.252697355 | 8.744964038 | 0.02026203  |
| HECTD2    | 0.056208336  | 6.350860017 | 0.020271579 |
| BAG5      | -0.069383508 | 7.865672525 | 0.020308231 |
| LOC729559 | 0.104270812  | 7.230192002 | 0.020311663 |
| HIST1H2BG | 0.09578075   | 6.593545187 | 0.02033725  |
| C20ORF108 | 0.132781558  | 8.703623404 | 0.02034658  |
| LOC652816 | -0.054993862 | 6.201453516 | 0.020349659 |
| ZP3       | 0.250719153  | 7.306029884 | 0.020372549 |
| UBXN1     | -0.08530681  | 10.38406031 | 0.020392421 |
| HSPA12B   | -0.135766791 | 8.196769383 | 0.020394372 |
| LOC375295 | 0.049992764  | 6.25237094  | 0.020401814 |
| MLPH      | 0.271385635  | 9.21923409  | 0.020422238 |
| FAM62B    | -0.129106733 | 11.22442117 | 0.020428248 |
| PHOSPHO2  | 0.066977792  | 6.367937193 | 0.020440954 |
| IKZF2     | 0.044652793  | 6.371064502 | 0.020461909 |
| LOC645508 | -0.063309172 | 6.050111695 | 0.020464972 |
| ZHX1      | 0.079290764  | 6.576352446 | 0.020466652 |
| ANKRD27   | 0.082890777  | 6.716769131 | 0.020471021 |
| KATNA1    | 0.092892579  | 8.590996656 | 0.020472085 |
| MPND      | 0.079968203  | 6.681643293 | 0.020489328 |
| PXMP4     | 0.090680604  | 6.737355929 | 0.02049104  |
| CA8       | -0.145476592 | 6.843269866 | 0.020508559 |
| C9ORF46   | 0.139440002  | 9.833007943 | 0.020516199 |
| LOC649095 | -0.068227166 | 6.207043275 | 0.020547195 |
| EIF3H     | 0.09174017   | 10.67051436 | 0.020567609 |
| SLC46A2   | 0.093427894  | 6.970263143 | 0.020572594 |
| TMEM8     | 0.140570002  | 8.140941529 | 0.020601559 |
| MORG1     | -0.096159698 | 6.91757103  | 0.020608602 |
| GPR175    | -0.078484164 | 7.463948149 | 0.020700677 |
| GGCX      | -0.078027321 | 6.977520246 | 0.020711838 |
| ALOX15B   | -0.044915472 | 6.162909996 | 0.020729438 |
| EPR1      | -0.065075681 | 6.077052187 | 0.02073133  |
| PER2      | 0.163335568  | 7.643595186 | 0.020837254 |
| CLP1      | -0.074312781 | 7.184380681 | 0.020855168 |
| SRL       | -0.13333161  | 12.72258643 | 0.020868702 |
| SLC5A8    | -0.15320346  | 7.110579792 | 0.02088755  |
| SNN       | -0.150406666 | 7.00413975  | 0.020905625 |
| MAD2L1BP  | 0.097941745  | 7.726129501 | 0.020919294 |
| LOC441528 | -0.065531801 | 6.069645494 | 0.020925844 |
| TYRO3P    | -0.073735197 | 5.983116572 | 0.020939566 |
| KLHL25    | -0.085998928 | 6.127544694 | 0.020945013 |
| YIF1A     | -0.170419188 | 9.270319906 | 0.020965912 |
| SCN5A     | 0.046404517  | 6.30169191  | 0.020966207 |
| ATF2      | 0.075029658  | 6.682982208 | 0.020982622 |
| PITX1     | 0.068025975  | 6.133681747 | 0.02098904  |
| LOC652595 | -0.147782455 | 8.558721749 | 0.021010794 |
| LOC654161 | 0.09753474   | 7.012874514 | 0.02101559  |
| MCM3APAS  | -0.062418265 | 6.154379821 | 0.021020212 |
| RAI16     | 0.127652035  | 7.225966107 | 0.02102705  |

## DEG.infomation

|           |              |             |             |
|-----------|--------------|-------------|-------------|
| RLN1      | -0.055879503 | 6.005973621 | 0.021029157 |
| PSMC6     | 0.137797612  | 9.491418752 | 0.021084736 |
| PPFIA2    | 0.056391772  | 6.009703899 | 0.021112594 |
| C9ORF106  | 0.063158494  | 6.215616188 | 0.021212633 |
| PTPRZ1    | -0.059377462 | 6.17702773  | 0.021213134 |
| JAK1      | -0.169424975 | 8.528572393 | 0.021232569 |
| NKX3-1    | -0.153552703 | 7.241213077 | 0.021237014 |
| FAM139A   | 0.053252143  | 6.040867381 | 0.02124407  |
| TSR2      | 0.15839044   | 8.863250445 | 0.021257466 |
| TOPORS    | 0.049835858  | 6.611933396 | 0.021290971 |
| MBD4      | -0.174325256 | 9.946322249 | 0.021329278 |
| LOC654074 | 0.132776834  | 6.788778988 | 0.021334116 |
| COQ9      | 0.157365053  | 11.20351529 | 0.021409156 |
| H2AFJ     | -0.115562586 | 8.139572186 | 0.021416351 |
| SLC13A4   | 0.071859911  | 6.226865837 | 0.021445586 |
| CNKSR1    | -0.060560725 | 6.320294321 | 0.021456713 |
| NBEAL1    | 0.060667028  | 6.034074037 | 0.021457704 |
| C6ORF62   | 0.091462237  | 8.048252881 | 0.02146354  |
| ERAP1     | 0.04768618   | 6.351361377 | 0.021476204 |
| UBE2M     | -0.080650836 | 11.64998195 | 0.021498058 |
| ZNHIT1    | 0.082211937  | 10.09165951 | 0.021537225 |
| PCSK1N    | 0.08181003   | 6.122210762 | 0.02155356  |
| TRIM26    | 0.077498696  | 7.518275061 | 0.021562266 |
| GM2A      | -0.155853311 | 6.943357067 | 0.021585796 |
| PMF1      | -0.103251604 | 7.554838528 | 0.02160602  |
| BIRC5     | -0.05632639  | 6.036273756 | 0.02161354  |
| NKAIN3    | -0.096931315 | 6.917776751 | 0.021625676 |
| HBA2      | -0.450593203 | 10.67368867 | 0.021627243 |
| TIRAP     | 0.036992714  | 6.430475151 | 0.021633785 |
| LOC648149 | 0.064494908  | 6.206030671 | 0.021663975 |
| PPIB      | -0.123623066 | 6.295499377 | 0.021674099 |
| CCDC149   | -0.078609862 | 6.401341137 | 0.021677272 |
| LOC197135 | -0.123558821 | 6.421094503 | 0.021681378 |
| TIMM23    | -0.07087673  | 10.33734916 | 0.021735458 |
| DEFB109   | 0.056503474  | 6.069807899 | 0.021740478 |
| CD200     | 0.056641176  | 6.458015873 | 0.021748822 |
| MC1R      | -0.085217051 | 6.752918677 | 0.021773466 |
| ITIH5     | -0.115590753 | 11.95495651 | 0.021775621 |
| SDCBP2    | -0.039654655 | 6.105544781 | 0.021781941 |
| AHSG      | 0.095472101  | 6.366984631 | 0.021791991 |
| HPS6      | -0.110019225 | 9.479215813 | 0.021797516 |
| FBXL3     | 0.091606101  | 6.737933611 | 0.021814151 |
| DLL3      | -0.046476501 | 5.932991118 | 0.021829963 |
| ZNF576    | -0.061969542 | 7.054092893 | 0.021851692 |
| TBCD      | -0.090769236 | 7.903090759 | 0.021878326 |
| ACCN5     | -0.059774069 | 6.016804522 | 0.021910551 |
| LOC642287 | 0.058346533  | 6.024242438 | 0.021918462 |
| DNAJA2    | 0.073374324  | 10.76299759 | 0.02198657  |
| MFSD5     | -0.084887402 | 8.170817457 | 0.022014528 |
| C7ORF25   | 0.086447984  | 7.498800306 | 0.022016493 |
| LOC652577 | -0.058136145 | 6.006131137 | 0.022079031 |

## DEG.infomation

|           |              |             |             |
|-----------|--------------|-------------|-------------|
| CDC40     | 0.080025045  | 8.885741225 | 0.022150807 |
| CAMK2D    | 0.121591186  | 7.869560297 | 0.022152753 |
| CHAC1     | -0.071923056 | 6.251483504 | 0.022205554 |
| ICOSLG    | 0.10332661   | 7.961022379 | 0.022212063 |
| RNF38     | 0.113640067  | 7.994404822 | 0.022231674 |
| BICD2     | -0.147222175 | 8.655165931 | 0.022243998 |
| OR5J2     | -0.057815273 | 5.890006981 | 0.022245874 |
| TECTA     | 0.064611272  | 6.551519681 | 0.02226454  |
| DHCR7     | -0.105078481 | 7.472565507 | 0.022279247 |
| GPR89A    | -0.080896796 | 6.585553289 | 0.022353417 |
| MSH3      | -0.110050239 | 12.99802033 | 0.022378369 |
| LOC116236 | -0.082561322 | 6.680369832 | 0.022395345 |
| CDH5      | -0.144703061 | 9.371143077 | 0.022409792 |
| LOC653801 | 0.053936623  | 5.904319809 | 0.022411623 |
| CENPK     | -0.068519147 | 6.151293286 | 0.022414852 |
| HSD17B7   | -0.152148109 | 11.26150326 | 0.022437615 |
| PRR14     | -0.1290273   | 8.745533687 | 0.02245431  |
| HNRPR     | -0.126791259 | 10.06003001 | 0.02246022  |
| DTX3L     | -0.079774493 | 6.288375819 | 0.022464477 |
| FLJ45717  | 0.07178199   | 6.332951792 | 0.022477578 |
| LOC646447 | 0.057988116  | 6.067747344 | 0.022489265 |
| GLI1      | 0.075357887  | 6.636471206 | 0.022509925 |
| BCL2L2    | 0.155623483  | 9.153924933 | 0.022539589 |
| KIR2DS1   | 0.044116552  | 6.034492143 | 0.022542117 |
| COL1A1    | -0.378987321 | 8.543471008 | 0.022552129 |
| TSGA14    | -0.050279285 | 6.321802531 | 0.022556539 |
| GLG1      | -0.092429315 | 10.75435255 | 0.022557433 |
| IL17RC    | -0.039505568 | 6.369809675 | 0.022560536 |
| ARF4      | -0.119633271 | 9.700185586 | 0.022570439 |
| FMNL3     | 0.056388835  | 6.402962848 | 0.02258633  |
| CD79A     | -0.038443579 | 6.166030294 | 0.022609994 |
| GYPC      | 0.11584123   | 9.946228474 | 0.022618137 |
| LOC653326 | 0.055150981  | 5.930032302 | 0.022632726 |
| NANOS1    | -0.055043117 | 6.212734577 | 0.022661781 |
| KIAA1751  | -0.160204352 | 8.31986932  | 0.022678141 |
| ANKRD22   | -0.048445769 | 6.077582362 | 0.022681437 |
| TMEM39A   | -0.086727739 | 7.027881994 | 0.022687433 |
| TTLL6     | 0.052122949  | 6.098889281 | 0.022688668 |
| LOC650968 | 0.055503419  | 6.139657345 | 0.022690466 |
| ARG99     | -0.066762757 | 6.122730463 | 0.022770145 |
| MNT       | 0.088296683  | 7.603113969 | 0.022770814 |
| RAB18     | 0.098674122  | 7.24486161  | 0.022778611 |
| LOC654113 | -0.057639375 | 5.964543086 | 0.022786415 |
| DDX26B    | 0.046100215  | 6.153399906 | 0.022797552 |
| CNR2      | 0.055697498  | 6.01771796  | 0.022828336 |
| TEX10     | -0.072456076 | 7.543277252 | 0.022828398 |
| GAL3ST2   | 0.079340918  | 6.545432762 | 0.02283744  |
| CDKL2     | 0.045745632  | 5.969542618 | 0.022838396 |
| C6ORF163  | 0.05973386   | 6.162684641 | 0.02292252  |
| LOC391322 | 0.051682019  | 6.188826498 | 0.02294936  |
| C8ORF76   | -0.089074889 | 9.184888984 | 0.023023126 |

## DEG.infomation

|           |              |             |             |
|-----------|--------------|-------------|-------------|
| LOC645447 | 0.033012637  | 6.046615738 | 0.023054013 |
| EGR2      | -0.204744202 | 7.057331514 | 0.023061664 |
| ZNF430    | -0.127512995 | 11.22542416 | 0.023066448 |
| TBC1D3    | -0.067032145 | 6.028545984 | 0.023090426 |
| BFSP1     | 0.066283494  | 6.002134462 | 0.023090999 |
| MBTPS2    | 0.068940685  | 6.384249338 | 0.023114926 |
| FAM122A   | -0.049154562 | 6.518017828 | 0.023122242 |
| RARG      | -0.055362239 | 6.233206601 | 0.023127053 |
| HOXB2     | -0.134485574 | 6.87851231  | 0.023146407 |
| NEDD4L    | 0.137783271  | 8.459028699 | 0.023187116 |
| HS2ST1    | 0.095678701  | 6.805486496 | 0.023202417 |
| ITGA2B    | -0.076514642 | 5.912305536 | 0.023218377 |
| RDBP      | -0.090405788 | 7.490065996 | 0.02324836  |
| CYP2C9    | -0.062402017 | 5.950959637 | 0.023262867 |
| MAPKAPK2  | -0.149419947 | 7.933002642 | 0.023274455 |
| JMJD4     | 0.083784444  | 6.661769171 | 0.023294649 |
| OR6B1     | -0.069135899 | 6.229894462 | 0.023302958 |
| MORC2     | 0.096197479  | 7.418460749 | 0.023309713 |
| STX8      | 0.125659353  | 8.519154968 | 0.023320974 |
| ARHGAP29  | 0.069025173  | 6.281920565 | 0.023327233 |
| DOK2      | -0.066522916 | 6.050452965 | 0.023329062 |
| RPL17     | -0.134993643 | 12.19458521 | 0.023342586 |
| UNQ9370   | 0.077412002  | 6.06071768  | 0.023344319 |
| LOC650566 | 0.059747893  | 6.02365013  | 0.023380406 |
| GAS6      | 0.132113977  | 10.33966178 | 0.023395986 |
| ZHX3      | -0.120204318 | 7.467201977 | 0.023396655 |
| F8A1      | 0.08841226   | 7.63076113  | 0.023402652 |
| PIGT      | -0.093962668 | 10.00520299 | 0.023412334 |
| SCN9A     | -0.045401966 | 6.330182094 | 0.023418732 |
| FAM65B    | 0.180056862  | 7.194945784 | 0.023450605 |
| ZNF174    | 0.058281975  | 6.624442924 | 0.023461336 |
| SCHIP1    | 0.141320533  | 10.09334489 | 0.023465496 |
| TMEM20    | 0.083417799  | 6.517292865 | 0.0235158   |
| C10ORF111 | 0.056730954  | 6.119729017 | 0.02353596  |
| GPLD1     | 0.039308178  | 6.021457377 | 0.023538153 |
| SGMS1     | -0.073250308 | 6.470216809 | 0.023572257 |
| EML4      | -0.118659136 | 7.60767773  | 0.023580706 |
| PMAIP1    | -0.042738239 | 6.111822689 | 0.023640124 |
| C5ORF5    | 0.128247722  | 9.107633552 | 0.023716067 |
| C10ORF108 | -0.077203796 | 6.152797825 | 0.023757384 |
| C8ORF38   | -0.113025785 | 8.125493611 | 0.023772086 |
| MRPL20    | 0.125433059  | 9.882187677 | 0.023776594 |
| PCGF2     | 0.090410028  | 7.702554611 | 0.023830283 |
| IFFO1     | 0.113669152  | 8.344376122 | 0.023831659 |
| ZSCAN21   | 0.069017696  | 7.1034726   | 0.023893541 |
| ZPLD1     | -0.064429253 | 5.912355136 | 0.023951155 |
| KDELC2    | -0.107001318 | 8.160642982 | 0.02406743  |
| CAPS2     | 0.066067118  | 5.99938289  | 0.024079973 |
| LOC352909 | 0.074821107  | 6.03881251  | 0.024101426 |
| RNF113A   | 0.149220935  | 7.584638429 | 0.024124103 |
| LOC643831 | 0.065224481  | 6.520145609 | 0.024133949 |

## DEG.infomation

|           |              |             |             |
|-----------|--------------|-------------|-------------|
| LOC643774 | 0.0625209    | 6.026767011 | 0.024136047 |
| ACE       | 0.037129419  | 6.071378303 | 0.02416432  |
| C22ORF29  | 0.083591411  | 6.936838868 | 0.024175412 |
| LOC646676 | -0.053346023 | 6.184276607 | 0.024177865 |
| SYNJ1     | 0.077674245  | 6.843130113 | 0.024257436 |
| ADIPOQ    | -0.061896415 | 6.28562807  | 0.024290408 |
| LOC647135 | -0.032318425 | 6.130596125 | 0.024303295 |
| C17ORF95  | 0.096947526  | 7.039322737 | 0.024303454 |
| FSIP1     | 0.103670194  | 6.353862397 | 0.024308702 |
| FBXO48    | 0.044449983  | 6.121177884 | 0.024310978 |
| OR1411    | 0.055780756  | 5.998802309 | 0.024328959 |
| ELF2      | 0.066909681  | 7.768092604 | 0.024330378 |
| CNTNAP3   | -0.08598218  | 6.12176784  | 0.024351905 |
| FSCN1     | 0.192293224  | 9.918385312 | 0.024379341 |
| TMEM191B  | 0.039461226  | 6.15188108  | 0.024415731 |
| SLC39A13  | 0.081928648  | 6.443620699 | 0.024428356 |
| EXOSC3    | -0.092710536 | 7.923162187 | 0.024431868 |
| RAB27B    | 0.040481537  | 6.151756881 | 0.024463301 |
| EIF2AK4   | -0.126873707 | 8.363413783 | 0.024483618 |
| RPL13A    | -0.232350704 | 9.105001118 | 0.024516165 |
| ZNF317    | 0.081224953  | 7.556740728 | 0.024541945 |
| RBX1      | 0.089484621  | 11.14420185 | 0.024602479 |
| DDB2      | 0.076865893  | 6.286331406 | 0.024638882 |
| LOC650577 | 0.058893983  | 5.98104273  | 0.024654875 |
| COL4A4    | -0.126451049 | 6.36951403  | 0.024672365 |
| C2ORF7    | 0.125876907  | 9.469578602 | 0.024709378 |
| NARFL     | 0.066265296  | 7.686699704 | 0.024754538 |
| YIPF2     | -0.077060941 | 6.994792814 | 0.024768456 |
| DFFB      | -0.058738138 | 6.382799285 | 0.024772359 |
| GLE1      | 0.155486091  | 8.174373599 | 0.02478464  |
| SCML2     | -0.064001459 | 6.484195996 | 0.024808574 |
| APBB2     | 0.12271377   | 7.302360932 | 0.024814323 |
| HCG2P7    | -0.167046257 | 10.47415745 | 0.024819594 |
| PIK3R3    | -0.107859629 | 6.404654641 | 0.024825339 |
| KLRF1     | 0.070563154  | 6.159235381 | 0.024828957 |
| LRRC24    | -0.060846367 | 6.012990238 | 0.024830107 |
| FAR1      | 0.089552628  | 8.134464304 | 0.024866638 |
| LRRC34    | 0.088094763  | 6.004382495 | 0.024895254 |
| GHRL      | -0.061644238 | 6.08163249  | 0.0248974   |
| LOC650003 | -0.079649499 | 6.104138741 | 0.02490578  |
| CCR9      | 0.063427288  | 5.977915596 | 0.024926786 |
| LSDP5     | -0.159641696 | 7.320198845 | 0.024934114 |
| VARS2     | 0.135131948  | 8.689283489 | 0.024967064 |
| HMGB4     | -0.039675147 | 6.026270233 | 0.024969401 |
| TAS2R10   | 0.068169298  | 6.231243271 | 0.02497575  |
| GCH1      | -0.054525215 | 6.115769153 | 0.025003988 |
| C14ORF124 | -0.152332569 | 7.496270547 | 0.025004181 |
| MYO1B     | -0.149835888 | 7.917039641 | 0.025016901 |
| CREM      | 0.130772998  | 6.436905571 | 0.025021842 |
| CP        | -0.054738448 | 6.077146866 | 0.025072091 |
| LOC643959 | -0.051485428 | 6.11252007  | 0.025086032 |

## DEG.infomation

|           |              |             |             |
|-----------|--------------|-------------|-------------|
| LOC650193 | -0.05279627  | 5.944540249 | 0.025097153 |
| LPIN2     | -0.056890647 | 7.056436698 | 0.025102826 |
| LIN54     | 0.070741766  | 6.860825492 | 0.025153907 |
| TSSK6     | 0.066315303  | 6.159911778 | 0.025161733 |
| NR1H2     | -0.102541387 | 8.822430945 | 0.025179411 |
| RFC5      | 0.060335728  | 6.905236281 | 0.025185223 |
| LOC643790 | 0.06914141   | 6.477738288 | 0.025196815 |
| LOC730479 | 0.055443451  | 6.047007189 | 0.025241875 |
| IL12RB1   | -0.033998479 | 6.061787021 | 0.025244389 |
| NMT1      | -0.125884142 | 7.218009175 | 0.025258308 |
| MATK      | -0.047693446 | 6.192354732 | 0.025266524 |
| CREG1     | 0.121960629  | 9.458296017 | 0.025275254 |
| LOC646437 | 0.059911863  | 6.384644101 | 0.025308563 |
| LOC651326 | -0.067262003 | 5.929928784 | 0.025312154 |
| CCT5      | -0.101249869 | 6.839361939 | 0.02534147  |
| TP53I3    | 0.091916274  | 6.951036685 | 0.025351008 |
| LOC729882 | -0.050484399 | 6.106132479 | 0.025377655 |
| METT5D1   | 0.09347511   | 6.846155873 | 0.025390692 |
| LOC162073 | -0.090814158 | 6.33961648  | 0.025423747 |
| C5ORF45   | 0.048004675  | 6.482468013 | 0.025432537 |
| LOC729137 | -0.056778294 | 6.254662494 | 0.025445913 |
| PSMD12    | -0.191835111 | 10.24645504 | 0.025461329 |
| SLC25A23  | 0.137467307  | 11.10583307 | 0.025495077 |
| LOC729675 | 0.058015456  | 6.176319946 | 0.025512707 |
| IARS      | -0.117968576 | 8.032372624 | 0.025535246 |
| LOC642156 | 0.054482935  | 6.209676009 | 0.02555567  |
| MBOAT2    | 0.08487975   | 6.769506062 | 0.025580755 |
| RHOT1     | 0.092805262  | 8.394211274 | 0.025582541 |
| HES4      | -0.144756735 | 11.12806493 | 0.025592269 |
| C15ORF37  | 0.051066782  | 6.057156545 | 0.025612612 |
| BDH2      | 0.080173809  | 6.164015794 | 0.025654672 |
| C1ORF59   | -0.078519381 | 6.796399896 | 0.025670277 |
| UHMK1     | -0.080406405 | 6.351343821 | 0.025675281 |
| ZNF625    | 0.050956972  | 6.297363149 | 0.025678294 |
| SLC25A42  | -0.11490084  | 8.534163119 | 0.025683512 |
| LOC645015 | -0.060370791 | 6.196621933 | 0.025730955 |
| SV2A      | 0.065009843  | 6.168069464 | 0.025739969 |
| ATP6AP1   | -0.14680531  | 11.29630632 | 0.025757815 |
| LOC653450 | 0.11073106   | 7.443381149 | 0.02577278  |
| HR        | 0.043746166  | 5.94839068  | 0.025783714 |
| LOC387790 | 0.0819899    | 5.981133497 | 0.025790912 |
| CCDC71    | -0.112822919 | 6.269627822 | 0.025801042 |
| RASA2     | -0.061515544 | 6.30485006  | 0.025837008 |
| SEC24B    | 0.059439697  | 6.934863932 | 0.0258474   |
| UBE2L3    | -0.097129196 | 8.216621353 | 0.025856114 |
| SETDB1    | 0.08542448   | 7.273048427 | 0.025884527 |
| MITF      | 0.085227617  | 7.243239095 | 0.025891698 |
| LOC643995 | -0.051731561 | 6.220138271 | 0.025921049 |
| LOC646858 | 0.053570008  | 6.087819094 | 0.025925665 |
| ALKBH7    | 0.122841526  | 9.442764836 | 0.025934888 |
| HERC3     | 0.106134946  | 7.640139452 | 0.025936469 |

## DEG.infomation

|           |              |             |             |
|-----------|--------------|-------------|-------------|
| APH1B     | -0.088035044 | 6.867349322 | 0.0259375   |
| LOC653383 | -0.104450085 | 7.019249772 | 0.02593917  |
| SLC27A3   | -0.201167797 | 7.590414079 | 0.025941481 |
| KCNRG     | 0.057208794  | 6.178888619 | 0.02594442  |
| LOC644150 | 0.07521079   | 6.429704799 | 0.025968643 |
| CPT1C     | -0.082184941 | 6.553625793 | 0.025998251 |
| WNK3      | -0.043122044 | 6.123939018 | 0.026004156 |
| SPATA13   | -0.11551359  | 6.71153527  | 0.026004973 |
| MRPS10    | 0.100743836  | 10.52466643 | 0.026045578 |
| DCP2      | 0.091904379  | 8.135825446 | 0.026096055 |
| C6ORF201  | 0.056127429  | 5.987455863 | 0.026124753 |
| PLEKHJ1   | -0.107298127 | 6.881675561 | 0.026126053 |
| LOC391767 | 0.057665368  | 5.989973674 | 0.026139567 |
| PTGER3    | 0.043522789  | 6.115155147 | 0.026177129 |
| LOC127406 | -0.058890237 | 6.069780264 | 0.026205298 |
| ACAP3     | -0.083608477 | 6.293823321 | 0.02621005  |
| ZNF236    | 0.055345251  | 6.328592482 | 0.026290836 |
| DYSF      | -0.137802774 | 9.263222148 | 0.02631776  |
| LOC400464 | 0.079118289  | 6.559172399 | 0.026367544 |
| MRPS9     | 0.134534112  | 10.06941776 | 0.026374456 |
| ADAMTS17  | 0.061366118  | 6.282906192 | 0.026375159 |
| UBQLN1    | 0.09240391   | 9.033902736 | 0.026424368 |
| ZMYM3     | 0.070486317  | 6.386382273 | 0.026427988 |
| ARFIP1    | 0.07078321   | 7.011697117 | 0.026485315 |
| LOC652140 | 0.057210255  | 6.21198037  | 0.02653977  |
| DOLK      | 0.075502834  | 7.543888611 | 0.026573389 |
| ZNF835    | 0.054702989  | 6.036598091 | 0.026582954 |
| C22ORF31  | 0.061549557  | 5.94426542  | 0.026586271 |
| CLEC2B    | -0.108689531 | 6.699423216 | 0.026596881 |
| CD72      | -0.061931521 | 6.293918758 | 0.026608919 |
| ZNF566    | 0.044974386  | 6.274607845 | 0.026609314 |
| POM121    | 0.049196755  | 6.099319261 | 0.026637398 |
| LOC652889 | -0.056517211 | 6.124060637 | 0.026682302 |
| LOC654032 | -0.043179975 | 6.013120081 | 0.026686571 |
| PLS3      | 0.111517123  | 9.454295153 | 0.026725908 |
| TESSP5    | 0.109957245  | 6.285807895 | 0.026728927 |
| PTPN22    | -0.029456938 | 6.035970764 | 0.026779949 |
| TNFRSF4   | 0.176381358  | 7.137274155 | 0.026783352 |
| C15ORF5   | 0.084375061  | 6.392198849 | 0.02681717  |
| GINS3     | 0.106408812  | 7.818045118 | 0.026943559 |
| DAPP1     | -0.151546745 | 10.42514607 | 0.02695024  |
| PIM2      | -0.083320541 | 6.728374431 | 0.026954935 |
| GRIN3A    | -0.062901061 | 6.120417831 | 0.026998369 |
| DAXX      | -0.087945592 | 6.810714295 | 0.026999571 |
| TSN       | 0.132816906  | 6.51110094  | 0.02701571  |
| ENC1      | 0.159135809  | 7.335660282 | 0.027041736 |
| DNAL4     | 0.102037716  | 8.608359859 | 0.02707617  |
| SSR4      | -0.112341786 | 10.89139572 | 0.027078568 |
| WWTR1     | -0.08145701  | 6.274691352 | 0.027103809 |
| FUT8      | 0.061469595  | 6.517560112 | 0.027108295 |
| B3GNT9    | 0.059810548  | 6.123523135 | 0.027119146 |



## DEG.infomation

|           |              |             |             |
|-----------|--------------|-------------|-------------|
| RPUSD3    | -0.092236901 | 8.675915457 | 0.027153945 |
| AHDC1     | -0.087742358 | 6.760935881 | 0.0271751   |
| FAM118A   | -0.127285093 | 6.393826696 | 0.027183905 |
| RICS      | -0.073701322 | 6.726835456 | 0.027221691 |
| PICK1     | -0.129097586 | 7.724361404 | 0.027252649 |
| NOC3L     | -0.151457257 | 8.3561939   | 0.027270699 |
| EIF3K     | 0.087471162  | 12.07089613 | 0.027275267 |
| TCF15     | -0.127034882 | 7.231716354 | 0.027288242 |
| MSL2L1    | 0.054674169  | 6.708377614 | 0.02729556  |
| PCYT1B    | -0.049497686 | 5.951192368 | 0.027297713 |
| LOC646938 | -0.061429637 | 6.414206486 | 0.027316929 |
| SFXN4     | -0.084017615 | 9.335978279 | 0.0273221   |
| USP1      | 0.073108966  | 7.01110157  | 0.027341302 |
| NCOR2     | -0.102614073 | 9.186747117 | 0.027362    |
| SERF1B    | 0.119019788  | 8.016427118 | 0.027365556 |
| CLIP4     | 0.147177798  | 8.221078707 | 0.027366554 |
| LYG2      | -0.06483922  | 6.041437352 | 0.027368225 |
| SCP2      | 0.087133163  | 6.825962562 | 0.027372402 |
| NDUFB1    | 0.126868685  | 7.33178209  | 0.027397554 |
| NNAT      | -0.040341862 | 6.152792251 | 0.027398063 |
| CMC1      | -0.105662903 | 8.465518584 | 0.027420167 |
| LOC255326 | -0.064221433 | 6.31224998  | 0.027428514 |
| KLHDC8B   | -0.142421469 | 10.76132062 | 0.0274551   |
| C6ORF159  | -0.04455055  | 6.064905612 | 0.027463751 |
| YY1       | -0.132418564 | 8.692873551 | 0.027469597 |
| CENPC1    | 0.075307983  | 6.287478279 | 0.027490318 |
| VASH1     | -0.165283863 | 7.884800959 | 0.0275129   |
| SNORD34   | -0.052263008 | 6.072699849 | 0.027534321 |
| RPS6KA4   | -0.123478114 | 7.099097304 | 0.027545195 |
| LOC642418 | -0.052245519 | 5.998051199 | 0.027572048 |
| C2ORF27   | 0.058621288  | 6.028085425 | 0.027576169 |
| CST2      | 0.123975949  | 6.012439379 | 0.027635866 |
| ABCA11    | 0.072820865  | 6.474794412 | 0.027642571 |
| TMPRSS12  | 0.048714793  | 6.150497142 | 0.027683621 |
| POLG      | -0.093422847 | 7.620161031 | 0.027699016 |
| PRELP     | 0.061403876  | 6.421060991 | 0.027714137 |
| GSTTP2    | -0.058703068 | 6.460822808 | 0.027746165 |
| ZNF532    | 0.088842928  | 8.122995239 | 0.027782566 |
| NTSR2     | -0.031651557 | 6.049874064 | 0.027790396 |
| LOC648639 | -0.059631309 | 5.950554816 | 0.027799598 |
| ALMS1     | 0.079798604  | 6.647889209 | 0.02782149  |
| FARSLB    | -0.114424474 | 14.12410866 | 0.027837758 |
| LOC643870 | 0.134295885  | 7.281487272 | 0.027866496 |
| LSG1      | -0.107432351 | 7.112672601 | 0.027967095 |
| UAP1L1    | 0.097392757  | 7.008946028 | 0.02797457  |
| TMEM91    | -0.102853982 | 7.398082184 | 0.027995005 |
| ALAS2     | 0.04198793   | 6.119145523 | 0.028030294 |
| ANXA11    | -0.096087725 | 8.750888923 | 0.028087218 |
| C7ORF59   | 0.245739542  | 8.902231594 | 0.028131492 |
| SRD5A1    | 0.063556865  | 6.340694085 | 0.02822146  |
| TRIM37    | -0.06131345  | 6.86022315  | 0.028252805 |

## DEG.infomation

|           |              |             |             |
|-----------|--------------|-------------|-------------|
| LOC646134 | -0.053938581 | 6.076460951 | 0.02826568  |
| RDM1      | 0.043894449  | 6.044692595 | 0.028290597 |
| C1ORF107  | -0.046670728 | 6.20857709  | 0.028293986 |
| IGLL1     | -0.199994282 | 6.660260653 | 0.028350816 |
| LOC389517 | -0.121717138 | 9.871798546 | 0.028359035 |
| ABR       | 0.108463825  | 9.423814027 | 0.028364276 |
| CALR      | -0.133613934 | 8.87095495  | 0.028372382 |
| SPG7      | -0.110917115 | 9.162846805 | 0.028470072 |
| FMNL1     | -0.059858598 | 6.225433244 | 0.028475091 |
| ZNF319    | -0.069789576 | 7.8166402   | 0.028500919 |
| LOC730015 | 0.073575937  | 6.134615981 | 0.028528129 |
| NCL       | -0.098748133 | 9.823267965 | 0.028530375 |
| PCGF6     | 0.076250826  | 7.297766935 | 0.028574744 |
| JARID2    | -0.140932034 | 7.909436195 | 0.028580087 |
| LOC648814 | 0.070833178  | 6.289198529 | 0.028589091 |
| LOC644243 | 0.050014153  | 6.11131492  | 0.028670604 |
| SCGB2A2   | -0.05690189  | 6.003693162 | 0.028680059 |
| NEK9      | -0.058336874 | 6.164681797 | 0.028694554 |
| RECQL4    | -0.056589006 | 6.025330151 | 0.028701515 |
| FAM22A    | 0.038198597  | 6.175437267 | 0.028721363 |
| GABPB2    | -0.118523723 | 11.11209037 | 0.028750732 |
| VPS4B     | 0.08741579   | 8.504755816 | 0.028764614 |
| HERC2P2   | -0.029059906 | 6.189327406 | 0.028790365 |
| SDS       | -0.052336575 | 6.031108045 | 0.02879114  |
| CNTN6     | -0.056028727 | 6.451346052 | 0.028829311 |
| ERV3      | 0.088445276  | 6.302524065 | 0.028846478 |
| TRIM71    | -0.040119409 | 6.064853608 | 0.028865604 |
| LOC646890 | 0.04605498   | 6.085742558 | 0.028885683 |
| BET1L     | 0.095975123  | 6.359167369 | 0.028951631 |
| CRABP2    | 0.088487482  | 6.449040138 | 0.028956831 |
| GALR2     | -0.068055542 | 5.950743274 | 0.02896509  |
| LRRC50    | -0.068993907 | 6.099195248 | 0.028990474 |
| SHRM      | 0.191741466  | 8.815581264 | 0.029053359 |
| CTGF      | -0.322172029 | 10.88258146 | 0.029063474 |
| FAM5C     | -0.084682959 | 6.331554078 | 0.029066186 |
| NT5DC1    | 0.119034445  | 7.690751642 | 0.029078611 |
| TAC3      | 0.040753624  | 6.270654619 | 0.029098244 |
| OAS1      | -0.090964037 | 6.352975136 | 0.029142856 |
| STELLAR   | -0.052403638 | 5.953271825 | 0.029145519 |
| NHEDC2    | -0.047115595 | 6.255457772 | 0.029150485 |
| BAGE3     | -0.067193837 | 6.042190161 | 0.02915327  |
| DGAT2     | 0.0799845    | 6.363158814 | 0.029171765 |
| PRPH2     | 0.06605083   | 6.446847536 | 0.029196095 |
| LOC388789 | 0.090474324  | 10.30350319 | 0.029259722 |
| CTSZ      | -0.149830651 | 7.492410233 | 0.029269063 |
| NOMO1     | -0.125592172 | 8.564857462 | 0.029333088 |
| COX4NB    | -0.087816312 | 7.572210997 | 0.029333839 |
| FARS2     | 0.096942919  | 8.978448395 | 0.029374651 |
| ALG14     | 0.081411983  | 7.000833983 | 0.029388814 |
| FRAT2     | 0.108931478  | 8.076813874 | 0.029414114 |
| ASTN1     | 0.057846516  | 6.273434769 | 0.029431672 |

## DEG.infomation

|           |              |             |             |
|-----------|--------------|-------------|-------------|
| ZNF750    | -0.054193738 | 6.159165557 | 0.029448352 |
| CTNND1    | 0.030312166  | 6.254251275 | 0.029460846 |
| C14ORF151 | -0.069681993 | 6.505313814 | 0.029468087 |
| C14ORF173 | -0.108729308 | 9.158000238 | 0.029478661 |
| CUL5      | 0.169939289  | 9.585971148 | 0.029515433 |
| KRT126P   | -0.046114223 | 6.346567232 | 0.029533202 |
| OR11H6    | 0.060059963  | 5.984359906 | 0.029551559 |
| LOC643121 | 0.059278415  | 6.171958438 | 0.029558803 |
| DOCK5     | -0.065534863 | 6.461272854 | 0.029583169 |
| SUMF1     | 0.091838161  | 7.900351178 | 0.029621077 |
| HMHA1     | -0.086956661 | 6.202191553 | 0.029645922 |
| PGM2L1    | -0.072399046 | 6.446107473 | 0.029683146 |
| TMEM39B   | -0.072681144 | 7.180098174 | 0.029748636 |
| TRIP11    | 0.113294944  | 8.178250785 | 0.029789913 |
| TCF3      | -0.072249079 | 6.691111061 | 0.029800153 |
| PDS5B     | 0.066557504  | 7.230128612 | 0.029836194 |
| FXVD4     | 0.07002547   | 5.950478606 | 0.029871539 |
| NKPD1     | -0.036061069 | 5.969321186 | 0.029912882 |
| ACSL3     | -0.082221932 | 8.177913185 | 0.029913119 |
| ATMIN     | 0.090624805  | 7.292392658 | 0.029927666 |
| SCNM1     | -0.077584745 | 7.454203072 | 0.029970962 |
| HCFC2     | 0.082999474  | 6.871649855 | 0.029987856 |
| LOC389435 | -0.118096879 | 13.4541187  | 0.030007954 |
| SYTL3     | 0.134065036  | 7.638495838 | 0.030024842 |
| KIAA1683  | 0.09895786   | 6.309359281 | 0.030112185 |
| STXBP3    | 0.091199607  | 7.604530053 | 0.030143383 |
| C5ORF38   | 0.056150327  | 6.126353677 | 0.030177614 |
| CDH22     | -0.049214144 | 6.1353464   | 0.030188205 |
| LOC653764 | 0.140873901  | 8.149161603 | 0.030217434 |
| IDI1      | 0.113843214  | 7.429379481 | 0.030222711 |
| RWDD1     | -0.094680212 | 10.71410135 | 0.030234452 |
| LOC646254 | -0.065995279 | 6.073700181 | 0.030257586 |
| NSUN5C    | -0.065986555 | 6.751572214 | 0.030285038 |
| C14ORF145 | -0.071498891 | 6.111484129 | 0.030316371 |
| SHBG      | 0.056948408  | 6.367950664 | 0.030326897 |
| RSPH3     | 0.077475283  | 7.402509581 | 0.030330308 |
| F11R      | -0.102204011 | 6.708760374 | 0.030363091 |
| NAT6      | 0.089974696  | 7.002162768 | 0.030384638 |
| LOC643265 | 0.051884821  | 6.002096036 | 0.03039561  |
| CHST9     | -0.190925365 | 6.405447225 | 0.030395794 |
| LOC642486 | 0.060414314  | 6.362431814 | 0.030497942 |
| RSF1      | 0.086422647  | 6.258635721 | 0.030506585 |
| C6ORF105  | -0.050916498 | 6.047481456 | 0.030511488 |
| FBXL17    | 0.15139572   | 6.439670712 | 0.030529827 |
| FLJ20323  | -0.074861905 | 7.959980661 | 0.030546292 |
| NRG2      | 0.041709429  | 6.119720706 | 0.030599261 |
| RPS10     | -0.112958707 | 13.29104108 | 0.030609926 |
| TSP50     | 0.133858234  | 6.122277447 | 0.030646931 |
| LOC643842 | -0.07062505  | 6.043900273 | 0.030656124 |
| C1QL4     | -0.054611053 | 5.914564193 | 0.030686687 |
| LRRK2     | 0.04449768   | 6.170525944 | 0.030699386 |

## DEG.infomation

|            |              |             |             |
|------------|--------------|-------------|-------------|
| SEPT11     | 0.153400142  | 8.732250088 | 0.030717287 |
| SATL1      | 0.102181282  | 6.509426284 | 0.030744274 |
| TPST1      | -0.081722678 | 7.125740499 | 0.030802227 |
| MDGA1      | 0.063000581  | 6.417971069 | 0.030833302 |
| NID2       | 0.145287268  | 6.994642022 | 0.030842075 |
| LOC653275  | 0.049220103  | 6.041685865 | 0.030866129 |
| FAT4       | 0.068714495  | 6.222807004 | 0.030879474 |
| LOC646268  | -0.047134119 | 5.901645871 | 0.030924128 |
| HIP2       | -0.072318086 | 7.543292755 | 0.030924478 |
| LOC728468  | 0.059149628  | 6.132093504 | 0.030942437 |
| IFNAR1     | -0.087342514 | 7.971561521 | 0.030947276 |
| LOC440900  | 0.06087155   | 6.289186471 | 0.031045974 |
| PCDHB19P   | -0.13154928  | 7.491846539 | 0.031052224 |
| FH         | 0.153282713  | 11.76955037 | 0.031076714 |
| DSN1       | 0.085210156  | 6.78054611  | 0.031169906 |
| IGJ        | -0.079486741 | 6.101345091 | 0.031175902 |
| TM7SF4     | -0.054297095 | 6.031567822 | 0.03118693  |
| PHCA       | -0.108710744 | 7.513785383 | 0.031193778 |
| DIP2C      | 0.113375357  | 8.324693562 | 0.031223723 |
| RAB3A      | 0.078047947  | 6.155130207 | 0.031239836 |
| NUPL1      | 0.032367193  | 6.258541429 | 0.031245371 |
| SGK269     | 0.050879245  | 6.042912    | 0.031292197 |
| SLC22A18AS | -0.062420091 | 6.439405007 | 0.031309791 |
| PCDHB13    | -0.059717327 | 6.335508415 | 0.031342971 |
| LOC388276  | 0.056612048  | 6.089908296 | 0.031363424 |
| MUC2       | 0.074347947  | 6.14218156  | 0.031410287 |
| ZNF75A     | 0.10107477   | 7.090548094 | 0.031414856 |
| PPP1R13L   | 0.149620359  | 8.942164291 | 0.031419024 |
| TOX        | -0.061674017 | 6.017938795 | 0.031421837 |
| POLL       | 0.065847     | 6.314485124 | 0.03149173  |
| TRAPPC9    | 0.105362263  | 7.315374042 | 0.031565702 |
| DLG2       | 0.073165717  | 6.527690286 | 0.031570501 |
| GDPD5      | 0.071337892  | 6.501587141 | 0.031599613 |
| ZNF621     | 0.072732251  | 7.716357742 | 0.031602108 |
| LOC653471  | -0.036351203 | 6.241403036 | 0.031616976 |
| PIK3CA     | 0.07301703   | 6.461420806 | 0.031632961 |
| RYR1       | -0.043350927 | 6.164459422 | 0.031633372 |
| LOC145853  | 0.121885596  | 9.349430486 | 0.031633695 |
| ZNF146     | -0.113596773 | 7.950749081 | 0.031640411 |
| PRDM2      | -0.036888843 | 6.332440076 | 0.031658484 |
| ANKRD30B   | -0.138007697 | 10.92701225 | 0.031679554 |
| PLAC4      | -0.066527397 | 6.03714539  | 0.031684664 |
| LOC646562  | 0.06121872   | 6.173229168 | 0.031714732 |
| ARHGEF7    | -0.063858841 | 7.966577911 | 0.031730537 |
| KCTD13     | -0.076773476 | 6.799464406 | 0.031738588 |
| XPNPEP3    | -0.143624477 | 12.01850322 | 0.031739819 |
| FLJ45445   | -0.040524154 | 6.122636858 | 0.031753285 |
| MTERFD3    | 0.043220274  | 6.253520763 | 0.031764081 |
| PDRG1      | 0.091654088  | 7.949812294 | 0.03177629  |
| SLC39A9    | -0.06885832  | 6.318647166 | 0.031809408 |
| UGCGL1     | -0.082718308 | 6.874020658 | 0.03183528  |

## DEG.infomation

|           |              |             |             |
|-----------|--------------|-------------|-------------|
| ANKRD2    | -0.366860285 | 8.748405523 | 0.031862008 |
| CDCA4     | -0.044296254 | 6.711806673 | 0.031881449 |
| SLC34A3   | 0.056437418  | 6.124644134 | 0.031886229 |
| FOXI2     | 0.059216423  | 6.151314833 | 0.031897332 |
| FEZF2     | 0.068451756  | 5.946544941 | 0.031902832 |
| RNUXA     | -0.073692805 | 7.9267575   | 0.031916518 |
| FLJ36492  | 0.075773531  | 6.239487076 | 0.031943971 |
| DUSP27    | 0.078169189  | 6.388125625 | 0.03197173  |
| CATSPERB  | -0.057150013 | 6.071399306 | 0.032019842 |
| METTL4    | 0.087553996  | 7.02947241  | 0.032024747 |
| UBOX5     | 0.040667274  | 6.475218275 | 0.032061568 |
| LOC643345 | 0.044897501  | 6.125253681 | 0.032072302 |
| CYLN2     | 0.101336918  | 6.926158227 | 0.032102533 |
| MAPK12    | 0.106521618  | 6.8433858   | 0.032103336 |
| C7ORF28B  | 0.167510537  | 7.99841316  | 0.032153905 |
| SPRR2B    | 0.056356516  | 6.141463142 | 0.032166562 |
| RASGRP3   | 0.137183971  | 9.180022835 | 0.032196625 |
| ZNF548    | 0.069749091  | 7.613710491 | 0.032200827 |
| RNF43     | 0.071199994  | 6.435527292 | 0.032215328 |
| C6ORF224  | -0.060089264 | 6.09005312  | 0.032230143 |
| LMO1      | -0.118361168 | 6.215632971 | 0.032263302 |
| ALDH8A1   | -0.035520429 | 6.112180972 | 0.032266891 |
| COL25A1   | -0.038145864 | 5.959465342 | 0.032327546 |
| C20ORF142 | -0.079362996 | 6.754382489 | 0.032337624 |
| CXORF39   | -0.075268213 | 6.413595761 | 0.032403226 |
| LGALS7    | -0.192158809 | 8.309500605 | 0.032405364 |
| UBQLNL    | -0.067262475 | 6.248823415 | 0.032453031 |
| RPL14     | 0.250963474  | 8.716707005 | 0.032481188 |
| CLCA4     | -0.058651988 | 5.98437909  | 0.03254065  |
| LOC731186 | 0.050533465  | 6.109201969 | 0.032541048 |
| CASP3     | -0.132859347 | 7.831355775 | 0.032553576 |
| ZNF629    | 0.132133636  | 6.881653093 | 0.032586264 |
| TEX13A    | -0.056503098 | 6.353101209 | 0.032586833 |
| CLTC      | -0.136259346 | 7.208706504 | 0.032612722 |
| GDAP2     | -0.049351535 | 6.236574042 | 0.03262073  |
| DCLRE1A   | 0.088415562  | 7.294958212 | 0.032622259 |
| LOC643997 | -0.170267409 | 7.808863351 | 0.032704632 |
| LOC643913 | 0.052711215  | 6.503747672 | 0.032706078 |
| PARP14    | -0.149541578 | 7.449906537 | 0.032714742 |
| FLJ46210  | -0.054700574 | 6.019927417 | 0.03271773  |
| LOC158160 | -0.106144799 | 6.980946025 | 0.03273838  |
| BPNT1     | 0.072475319  | 6.681951376 | 0.032739219 |
| LYSMD1    | 0.080277723  | 6.854103509 | 0.032777975 |
| S1PR5     | 0.059997881  | 6.174543775 | 0.032781992 |
| APEH      | 0.141730807  | 9.38871364  | 0.032808486 |
| PKM2      | -0.108351699 | 8.788986747 | 0.032825009 |
| KIAA0082  | 0.093186496  | 6.314790834 | 0.032917593 |
| C6ORF211  | 0.106664768  | 7.006574723 | 0.032939309 |
| LOC731096 | -0.107148441 | 12.522525   | 0.032951869 |
| SNAPC4    | -0.0891694   | 8.540197973 | 0.032963314 |
| SENP8     | 0.089153192  | 6.228864178 | 0.033020935 |

## DEG.infomation

|           |              |             |             |
|-----------|--------------|-------------|-------------|
| LOC642502 | -0.151413377 | 7.43735626  | 0.033023156 |
| LOC646871 | 0.049168082  | 6.024427316 | 0.033036178 |
| PYCR1     | -0.060621385 | 6.189820215 | 0.033047036 |
| FEN1      | -0.067934181 | 7.429001138 | 0.033049076 |
| LOC652326 | 0.066528651  | 6.514520792 | 0.033057873 |
| ZNF132    | 0.059222825  | 6.392675715 | 0.033067823 |
| LOC646825 | 0.058861538  | 6.08465846  | 0.033087035 |
| NFIB      | 0.122946652  | 10.8398646  | 0.03309273  |
| FRAT1     | 0.045948238  | 6.387731493 | 0.033118787 |
| PPP1R7    | 0.077434452  | 9.000432373 | 0.033118846 |
| ACSM2A    | 0.049626731  | 5.940696441 | 0.033163533 |
| HHATL     | 0.170085075  | 10.4015928  | 0.03319224  |
| LOC400120 | -0.065788063 | 6.559211721 | 0.033204671 |
| ZNF764    | 0.069486895  | 6.33322467  | 0.03322725  |
| ANKRD20A1 | 0.134659625  | 7.192531833 | 0.033231624 |
| LOC651655 | -0.055151395 | 5.876227196 | 0.03326108  |
| NOTUM     | -0.038454709 | 6.169963617 | 0.033279716 |
| LDLRAD3   | -0.071512354 | 6.10103324  | 0.033298591 |
| SERPINB4  | -0.05656199  | 5.905729135 | 0.03331021  |
| LOC152084 | 0.05242463   | 6.175846171 | 0.033315778 |
| RNF123    | 0.095328192  | 7.959285186 | 0.03338092  |
| ZNF521    | 0.124478619  | 6.987592709 | 0.033389882 |
| GVIN1     | 0.13395647   | 7.153712203 | 0.033439346 |
| SSTR5     | -0.063524099 | 5.987592861 | 0.033466231 |
| FLJ32065  | 0.051135794  | 6.153713914 | 0.033476493 |
| TUBGCP4   | -0.067005469 | 7.473655825 | 0.033479339 |
| PTPLAD1   | -0.063311013 | 7.690820988 | 0.033486164 |
| RAET1G    | -0.042550536 | 6.118211493 | 0.033500072 |
| LOC732450 | 0.079687924  | 6.37006815  | 0.033530289 |
| NOL3      | 0.118506633  | 8.432167099 | 0.033532701 |
| MED6      | 0.108670259  | 9.857446837 | 0.033532805 |
| LOC388578 | 0.058574906  | 6.088816079 | 0.03358889  |
| SP140L    | -0.052076876 | 6.298385218 | 0.033631677 |
| ABLIM3    | -0.159637634 | 8.371579328 | 0.033632166 |
| CD99L2    | -0.105634393 | 10.45400647 | 0.03363722  |
| TBC1D24   | 0.048538991  | 6.233145846 | 0.033645686 |
| CGRRF1    | 0.11357548   | 8.572005721 | 0.033648963 |
| LOC652265 | 0.053922803  | 6.129203513 | 0.033661373 |
| CTTN      | -0.109604669 | 8.957752542 | 0.033695462 |
| LOC650006 | -0.052594789 | 5.910525644 | 0.033745443 |
| EGFLAM    | -0.107616926 | 7.771313416 | 0.033772661 |
| IL17RD    | -0.14312488  | 8.202293709 | 0.033822748 |
| SYPL1     | -0.108272802 | 9.000186024 | 0.033857725 |
| CITED1    | -0.073957095 | 6.05912863  | 0.03387028  |
| QPRT      | -0.185996098 | 8.785989158 | 0.033874978 |
| FLJ20489  | 0.096854034  | 7.256021985 | 0.033930645 |
| RGAG1     | -0.063392824 | 6.269112675 | 0.033954461 |
| KRTAP6-2  | 0.067501757  | 6.458431241 | 0.033966128 |
| PKP4      | 0.097365845  | 8.581725957 | 0.033984701 |
| MKI67IP   | -0.132052538 | 8.543962451 | 0.034025734 |
| FLJ40125  | 0.054199032  | 6.22447425  | 0.03407427  |

## DEG.infomation

|           |              |             |             |
|-----------|--------------|-------------|-------------|
| ZNF454    | 0.083403652  | 6.14837094  | 0.03408141  |
| LOC645362 | 0.112002125  | 7.078635083 | 0.034082855 |
| LOC440970 | 0.057717556  | 6.096257096 | 0.034098759 |
| LOC642775 | 0.070553853  | 6.287580311 | 0.034104593 |
| SEC24A    | -0.110485893 | 6.594658713 | 0.034114795 |
| ANAPC5    | -0.052786466 | 10.0601844  | 0.034139835 |
| TRIM58    | -0.051988789 | 6.143490773 | 0.03420749  |
| KCNB1     | -0.068695225 | 6.258112011 | 0.03424557  |
| C4B       | 0.059131659  | 6.071274634 | 0.034279336 |
| HNRPA1L-2 | 0.137170392  | 8.707813972 | 0.034302335 |
| LOC648900 | -0.050486752 | 6.029237071 | 0.034314357 |
| KRTAP10-2 | 0.047192537  | 6.222222203 | 0.034321812 |
| OR10H3    | 0.049959245  | 6.021717154 | 0.034330952 |
| ZNF570    | 0.054280238  | 6.309541964 | 0.034339568 |
| TCEAL3    | -0.094895104 | 10.05726445 | 0.034344187 |
| LOC647656 | -0.049216221 | 5.987182019 | 0.034353537 |
| HIST1H2AE | 0.0711604    | 6.195097292 | 0.034369378 |
| CHST6     | 0.078128488  | 6.284652727 | 0.034374431 |
| LOC646089 | -0.053908239 | 6.047264146 | 0.034385509 |
| LOC113230 | 0.082992152  | 6.69072467  | 0.034398478 |
| TSC22D4   | 0.096708623  | 7.259710987 | 0.034419611 |
| TRIO      | -0.087398505 | 6.9747805   | 0.03446264  |
| BOLA3     | 0.120938668  | 10.70791808 | 0.034465847 |
| NPAS3     | 0.033248047  | 6.051962713 | 0.034478782 |
| RECQL5    | 0.037267751  | 6.414259293 | 0.034529    |
| BSCL2     | -0.091928299 | 8.617748324 | 0.034548263 |
| SLC13A5   | -0.060918197 | 6.016952273 | 0.034637656 |
| TRPC7     | 0.049165843  | 6.053579428 | 0.034639166 |
| TRIM43    | 0.062861053  | 5.933246878 | 0.034648378 |
| SCLT1     | -0.063040229 | 6.221118614 | 0.034658697 |
| SOX12     | 0.051594638  | 6.243032932 | 0.03468305  |
| EPS8      | -0.147786129 | 7.536835414 | 0.03471277  |
| SOX14     | 0.057457697  | 6.326335555 | 0.034718507 |
| LOC642889 | -0.054908429 | 6.047076704 | 0.034719043 |
| SH3TC2    | 0.032539425  | 6.198999622 | 0.034733688 |
| OS9       | -0.134242837 | 6.904551544 | 0.034743558 |
| LOC728308 | -0.055873403 | 6.130117635 | 0.034771301 |
| LOC339742 | 0.031890988  | 6.119881564 | 0.034780183 |
| MEA1      | 0.090864612  | 7.749686847 | 0.034791484 |
| IFT140    | 0.06358208   | 6.49705248  | 0.03479357  |
| SLC9A6    | -0.053835811 | 6.955681986 | 0.034795355 |
| MAN1B1    | 0.1002109    | 8.83137263  | 0.034801428 |
| ANAPC2    | -0.050753507 | 6.186893462 | 0.034875297 |
| GPR107    | -0.056853545 | 6.15114793  | 0.034905349 |
| TMEM107   | 0.07674625   | 6.436479586 | 0.034923651 |
| CTGLF1    | 0.057475811  | 6.447343541 | 0.034941412 |
| CCDC37    | -0.049750709 | 6.050174417 | 0.034950201 |
| TMEM87B   | -0.054288583 | 6.27017273  | 0.034955017 |
| SLC25A12  | 0.140360809  | 9.420536703 | 0.034956232 |
| LOC644112 | 0.053069396  | 6.01072089  | 0.035001678 |
| SAPS1     | -0.07991629  | 7.15819577  | 0.035013894 |

## DEG.infomation

|           |              |             |             |
|-----------|--------------|-------------|-------------|
| LOC643150 | -0.059800581 | 6.023437661 | 0.035022517 |
| ZNF846    | 0.05341933   | 6.099685541 | 0.03504865  |
| NUDT15    | 0.072999705  | 7.377105013 | 0.035068813 |
| LOC728895 | -0.068660309 | 6.179509891 | 0.035098545 |
| C16ORF45  | 0.129388383  | 7.490263256 | 0.03515245  |
| HN1       | -0.111743048 | 6.77323367  | 0.03518001  |
| LOC652246 | 0.056517911  | 5.909565548 | 0.035188196 |
| SLC29A3   | 0.0671668    | 6.306754909 | 0.035190884 |
| CHCHD8    | -0.089536028 | 7.401541263 | 0.035210702 |
| ST5       | -0.068451768 | 7.122965842 | 0.035229685 |
| KRT16     | 0.052684609  | 6.371772763 | 0.035257814 |
| APOB48R   | -0.055614588 | 6.063837924 | 0.035267974 |
| FAM91A1   | -0.059325752 | 6.266315736 | 0.035276541 |
| KIF20B    | 0.069267945  | 6.923612021 | 0.035276992 |
| NAGPA     | 0.077465335  | 7.117463288 | 0.035296057 |
| LRIG1     | 0.125841366  | 9.726636254 | 0.03531697  |
| ISY1      | 0.059493795  | 8.199549244 | 0.035336801 |
| LOC732425 | -0.08171248  | 6.606553275 | 0.035395221 |
| EMILIN2   | -0.240688763 | 9.227399949 | 0.035399702 |
| FERMT1    | 0.070697678  | 6.111707797 | 0.035410492 |
| DNAJB5    | -0.137793493 | 7.629081185 | 0.035412216 |
| LOC646743 | 0.074310974  | 6.061692821 | 0.035422192 |
| LOC401280 | 0.052545545  | 6.238173418 | 0.035428953 |
| DHX8      | 0.072296301  | 6.593352954 | 0.035432899 |
| CT47.7    | 0.039325245  | 6.146984864 | 0.035436734 |
| MLL5      | 0.049448846  | 6.766471595 | 0.035438144 |
| MOSPD3    | -0.052720392 | 6.724788534 | 0.035457573 |
| UNC13A    | 0.035770491  | 6.284874987 | 0.035479987 |
| GSR       | 0.072188631  | 7.339288186 | 0.035487652 |
| MSL3L1    | -0.062223436 | 6.735698771 | 0.035559838 |
| SORT1     | 0.184529538  | 10.3178887  | 0.035571532 |
| COL15A1   | -0.160170119 | 9.789873191 | 0.035634895 |
| RFXAP     | 0.042303158  | 6.575515272 | 0.035636919 |
| GLMN      | 0.07426822   | 7.191923533 | 0.035644562 |
| LOC388969 | 0.087572932  | 7.149547365 | 0.03568721  |
| CCK       | 0.054579311  | 5.966204775 | 0.035708582 |
| HCG18     | -0.058023343 | 6.142959949 | 0.035782186 |
| ZNF295    | -0.101204363 | 6.996661685 | 0.035789409 |
| TTLL3     | 0.052083812  | 6.623444287 | 0.035831714 |
| MTUS1     | -0.092775537 | 7.451652742 | 0.035833539 |
| FIBIN     | 0.095533268  | 6.49460741  | 0.035867319 |
| SEC24C    | -0.078181557 | 8.766680615 | 0.035872595 |
| PRPH      | -0.060965571 | 6.543239594 | 0.035873374 |
| PRKAR1B   | 0.111571366  | 6.522929986 | 0.035883176 |
| ECAT1     | -0.061968119 | 6.011974014 | 0.035896317 |
| PPP4R1    | -0.074752589 | 8.833122189 | 0.035920307 |
| BPMS      | 0.068279492  | 7.515209717 | 0.035945221 |
| FKBP8     | 0.076031839  | 6.716365066 | 0.035965239 |
| LOC645895 | -0.149110938 | 13.1606745  | 0.035966545 |
| LOC646324 | 0.069484503  | 5.943528277 | 0.035973933 |
| AGPAT4    | 0.050368362  | 6.450996145 | 0.035980723 |



## DEG.infomation

|           |              |             |             |
|-----------|--------------|-------------|-------------|
| BAIAP2L2  | 0.058207361  | 6.459173782 | 0.036005732 |
| TRIM38    | -0.078971887 | 6.64482539  | 0.036019619 |
| KCNH6     | -0.173412358 | 10.72245028 | 0.036040143 |
| CPLX2     | 0.033517521  | 6.050391922 | 0.036057026 |
| LOC646519 | -0.057140487 | 6.252173019 | 0.03610195  |
| LRRC37B   | 0.05637681   | 6.604548631 | 0.036102982 |
| C1QTNF5   | 0.16253466   | 8.430288242 | 0.036112642 |
| MYCT1     | 0.07322894   | 6.61148717  | 0.036117936 |
| RFPL4B    | -0.040110315 | 5.994588045 | 0.036129126 |
| LOC441124 | -0.056369129 | 6.430961622 | 0.036160284 |
| PANX2     | -0.055021641 | 6.036541043 | 0.036181754 |
| LOC653741 | 0.052016493  | 6.115289711 | 0.036187183 |
| LOC441584 | -0.056331617 | 5.974111083 | 0.036188253 |
| PTPLB     | 0.120573971  | 8.954787345 | 0.03621347  |
| NEIL1     | 0.056422621  | 6.500090208 | 0.036214337 |
| LOC646210 | 0.054939609  | 6.207408666 | 0.03622714  |
| PRDM6     | 0.052998877  | 6.324839902 | 0.036242748 |
| VEGFC     | 0.134076592  | 7.14470734  | 0.036258765 |
| CGA       | -0.077118002 | 6.104625048 | 0.036338003 |
| LOC646561 | 0.046817415  | 6.066986476 | 0.036377139 |
| CRTC2     | -0.085482683 | 6.461093876 | 0.03654851  |
| CHMP7     | -0.098552775 | 6.869552764 | 0.036605465 |
| PLCG2     | -0.13496882  | 7.950757798 | 0.036631336 |
| LOC647536 | -0.049551086 | 6.019767277 | 0.036635703 |
| C11ORF73  | 0.104245424  | 8.151163627 | 0.036681547 |
| PSORS1C1  | -0.071406057 | 6.782982325 | 0.036706765 |
| FIT1      | 0.18840888   | 11.2798301  | 0.03672733  |
| IL18      | -0.128648131 | 12.57683762 | 0.036729413 |
| KIAA1543  | -0.037687646 | 5.996850533 | 0.036744136 |
| C1ORF112  | -0.061669414 | 6.387797955 | 0.036761045 |
| SIRPG     | 0.079417199  | 7.22009537  | 0.036776746 |
| LOC642342 | -0.10962872  | 6.647273961 | 0.036872178 |
| PGAP1     | 0.053057681  | 6.40956583  | 0.036875376 |
| FLJ21075  | 0.053115641  | 6.091158711 | 0.036889776 |
| ZNF665    | 0.059926447  | 5.872244476 | 0.036947575 |
| ARHGEF2   | 0.11037244   | 9.466824168 | 0.036956541 |
| ZNF511    | 0.09047205   | 9.635659199 | 0.036996294 |
| LOC642302 | 0.052960725  | 6.063110635 | 0.037064714 |
| CASC2     | -0.049681988 | 6.612742916 | 0.037105851 |
| LOC284948 | -0.05428586  | 6.075852028 | 0.037120434 |
| SLC17A7   | 0.055702245  | 6.303880886 | 0.037125481 |
| RFC4      | 0.065089848  | 7.77437188  | 0.037163621 |
| C11ORF39  | 0.056305865  | 5.998561268 | 0.037249966 |
| RBL2      | 0.078631211  | 8.635476945 | 0.037254814 |
| ANKRD36B  | 0.059463253  | 6.733295834 | 0.037258815 |
| LOC653232 | -0.098273064 | 12.47561254 | 0.037260755 |
| CIAPIN1   | -0.078327197 | 7.725226484 | 0.037262096 |
| CHD7      | -0.078431986 | 7.991001364 | 0.037263055 |
| KDEL3     | 0.116785132  | 7.33478996  | 0.037271811 |
| ASAP3     | -0.179719972 | 8.435957371 | 0.037320917 |
| EPC2      | 0.092990008  | 6.416048047 | 0.037355034 |

## DEG.infomation

|           |              |             |             |
|-----------|--------------|-------------|-------------|
| AMIGO2    | 0.05580077   | 6.389557734 | 0.037357517 |
| C7ORF27   | -0.109786597 | 8.708362052 | 0.03737689  |
| MT1B      | 0.053833002  | 6.132166097 | 0.037436136 |
| SULF2     | 0.090862722  | 7.577065175 | 0.037437108 |
| MED21     | 0.160816769  | 6.904752363 | 0.037456075 |
| C9ORF163  | 0.054641256  | 6.08993681  | 0.037488264 |
| NCKIPSD   | -0.084449689 | 7.11647161  | 0.037501563 |
| CCDC15    | 0.04408835   | 6.266136448 | 0.037505349 |
| LOC650898 | 0.094110227  | 6.431462321 | 0.037515114 |
| FLJ44606  | 0.049239285  | 6.357375116 | 0.037518726 |
| TRAPPC5   | -0.123250542 | 9.697739979 | 0.037569795 |
| HLA-A29.1 | -0.610021456 | 8.525485034 | 0.037587211 |
| FAM177B   | 0.05448792   | 5.971594034 | 0.037622026 |
| ZBTB44    | 0.093018056  | 6.980485022 | 0.03767926  |
| EIF1AX    | -0.181584763 | 8.064872769 | 0.037686305 |
| LOC654202 | 0.065906521  | 6.1234588   | 0.037718944 |
| MLLT6     | -0.087635873 | 9.200646384 | 0.037788865 |
| GOLGA7    | 0.06853389   | 8.393028886 | 0.037806053 |
| VCX-C     | 0.066042485  | 6.27387619  | 0.03786686  |
| BAZ1B     | 0.070594302  | 7.36229943  | 0.037869905 |
| LOC646781 | 0.044434096  | 5.937964103 | 0.03791153  |
| ZACN      | 0.078948855  | 5.914212957 | 0.037984324 |
| TYSND1    | -0.067119819 | 7.126118025 | 0.03800741  |
| HGFAC     | -0.062679981 | 5.988749359 | 0.038014537 |
| NIPSNAP3B | 0.141869424  | 6.429974886 | 0.038050777 |
| OR51T1    | 0.074974557  | 6.623762281 | 0.038054841 |
| HBB       | -0.402073721 | 11.08023742 | 0.038068767 |
| SF3B3     | -0.11132623  | 8.792860238 | 0.038126105 |
| C20ORF111 | 0.110355742  | 9.221597988 | 0.038130342 |
| LOC154907 | 0.052015695  | 5.91240218  | 0.038154765 |
| BANF1     | 0.097979701  | 9.880986225 | 0.03815578  |
| SIN3A     | 0.09158274   | 8.664214086 | 0.038182637 |
| NR4A2     | -0.214217366 | 6.521122338 | 0.038187995 |
| CCDC78    | -0.042251103 | 5.998675995 | 0.038200027 |
| TNFRSF10D | -0.07607736  | 5.999821642 | 0.038258975 |
| ELMO2     | -0.042889128 | 7.398352946 | 0.038263791 |
| LOC643714 | 0.048293683  | 6.091264855 | 0.038295149 |
| PTPRQ     | -0.054339699 | 6.291052192 | 0.03845234  |
| NDST4     | 0.051591876  | 6.025841561 | 0.038455889 |
| NFAT5     | -0.102136697 | 6.751477915 | 0.038534425 |
| LOC645893 | 0.062117127  | 5.929969987 | 0.038586132 |
| ETF1      | -0.111003269 | 9.501192977 | 0.038641781 |
| LOC646123 | 0.079140317  | 6.369108986 | 0.038664284 |
| LOC401895 | 0.056064486  | 6.186936093 | 0.038725993 |
| RDH8      | 0.046307932  | 6.225683077 | 0.038735064 |
| LOC653629 | -0.051546209 | 6.277954565 | 0.038740646 |
| ADAM10    | 0.072237976  | 6.917856634 | 0.038790507 |
| CAV2      | -0.127744738 | 9.60677837  | 0.038815915 |
| LUZP4     | -0.048228579 | 5.911344384 | 0.038880343 |
| SEMA3C    | 0.189642738  | 7.978974831 | 0.038921871 |
| PDE10A    | -0.040497967 | 6.039474159 | 0.038982143 |

## DEG.infomation

|           |              |             |             |
|-----------|--------------|-------------|-------------|
| ZNF781    | 0.038433345  | 6.183891871 | 0.039016801 |
| DNM2      | -0.087154269 | 7.787483646 | 0.039035381 |
| CD46      | 0.09774533   | 8.603118757 | 0.039084115 |
| LOC652287 | 0.054622292  | 6.21959707  | 0.039093309 |
| C14ORF129 | 0.073580633  | 7.435487185 | 0.039231249 |
| TLL11     | -0.062517952 | 6.323217173 | 0.039252199 |
| SEDLP     | -0.106558357 | 7.89676841  | 0.039253618 |
| LOC643145 | -0.063022523 | 5.901844467 | 0.039334811 |
| LOC392364 | -0.050645508 | 6.063736292 | 0.039341444 |
| LOC643596 | 0.051547745  | 5.996201832 | 0.039386114 |
| CLDN1     | 0.070053249  | 6.418110037 | 0.039396595 |
| TFAM      | 0.102122962  | 8.692785902 | 0.039404096 |
| RNMTL1    | 0.097362073  | 9.459597585 | 0.039412296 |
| VAMP7     | -0.122615023 | 8.893392481 | 0.039412369 |
| SLC44A1   | 0.105784668  | 9.508831886 | 0.039530601 |
| ZNF524    | -0.112462272 | 7.730301117 | 0.039552302 |
| OR1A1     | 0.052537158  | 5.978626095 | 0.039585988 |
| CCL17     | -0.057425258 | 5.982311577 | 0.039635371 |
| PAF1      | 0.133500621  | 9.262251959 | 0.039644945 |
| IPO5      | -0.129101654 | 8.08902999  | 0.039650262 |
| LOC653204 | -0.066330289 | 6.169344427 | 0.039718259 |
| MGC70863  | -0.059394291 | 6.332450711 | 0.039719651 |
| LOC729264 | 0.076484332  | 6.330499297 | 0.039740902 |
| ZNF434    | 0.077511662  | 7.402235733 | 0.039744031 |
| NPB       | 0.057577225  | 6.039859306 | 0.039778955 |
| LOC653333 | 0.060129496  | 6.283011    | 0.039783647 |
| CCDC134   | -0.054976244 | 6.231137027 | 0.039805231 |
| ATP6V1B2  | -0.110107391 | 10.63572989 | 0.039829997 |
| LOC653498 | 0.052278131  | 6.061618822 | 0.039887599 |
| GNA14     | -0.066918612 | 6.27013714  | 0.039910244 |
| ZCCHC6    | 0.080774316  | 6.619859019 | 0.039935803 |
| BAI2      | 0.061143866  | 6.066963049 | 0.039961969 |
| ZNF675    | 0.050932001  | 6.025611117 | 0.039993851 |
| ETV7      | -0.054712685 | 6.084599181 | 0.040003052 |
| DNASE1    | 0.050760679  | 6.129111805 | 0.040005449 |
| NIT1      | 0.107320065  | 7.332204361 | 0.0400172   |
| LOC641699 | -0.05034814  | 5.938524608 | 0.040034716 |
| SNORD35A  | -0.061469476 | 6.138904606 | 0.040047945 |
| GPX4      | -0.087008239 | 11.9751005  | 0.040155283 |
| SPA17     | -0.09092809  | 6.876202513 | 0.040156579 |
| ABCC10    | 0.07936067   | 6.465225933 | 0.040166822 |
| NUDT14    | -0.130120336 | 9.152521325 | 0.040201591 |
| SAT2      | 0.109022287  | 8.732550419 | 0.040205449 |
| PARL      | 0.065794046  | 9.926610842 | 0.040226653 |
| EPHA8     | 0.044355087  | 6.298896146 | 0.04022941  |
| KRT72     | 0.056228582  | 6.246776319 | 0.040266934 |
| LOC643262 | 0.050358313  | 6.002622765 | 0.040294023 |
| SYTL1     | 0.053259939  | 6.080638377 | 0.04029596  |
| FAM53B    | -0.141848436 | 7.754928196 | 0.040303962 |
| AMY1B     | 0.065715991  | 6.603235371 | 0.040344855 |
| TTYH1     | -0.054941779 | 6.199820747 | 0.040369204 |

## DEG.infomation

|           |              |             |             |
|-----------|--------------|-------------|-------------|
| DNAH9     | 0.032440101  | 6.025900546 | 0.040422549 |
| SMURF2    | -0.059722713 | 6.228665536 | 0.040451361 |
| SLCO1A2   | 0.026227381  | 5.983539986 | 0.040462968 |
| PDCL      | 0.06477575   | 6.538194661 | 0.040504887 |
| HIST1H2BI | -0.047904088 | 5.890788085 | 0.040579579 |
| CEP152    | -0.040850844 | 6.144151221 | 0.040595931 |
| LOC647839 | 0.05549906   | 5.969883245 | 0.040624926 |
| SFRS17A   | -0.08509461  | 8.775605805 | 0.040626939 |
| THOC7     | 0.10673173   | 11.230263   | 0.040629521 |
| SNORA32   | -0.058718886 | 6.216828929 | 0.040687408 |
| FZD4      | -0.096050838 | 9.433715569 | 0.040695662 |
| LOC654163 | 0.055484216  | 5.970490729 | 0.04075239  |
| ASXL3     | 0.049203941  | 6.020597379 | 0.040783737 |
| LOC647816 | 0.04632415   | 6.012015368 | 0.040848674 |
| LOC645875 | 0.047260157  | 6.112368868 | 0.04090084  |
| LOC652694 | -0.083921011 | 6.335645053 | 0.040927428 |
| LOC647129 | 0.045349424  | 6.040086697 | 0.040942721 |
| TBC1D14   | 0.096413987  | 9.065932483 | 0.040965518 |
| KIAA1602  | 0.113860218  | 7.750353412 | 0.041006648 |
| LOC441177 | 0.051397861  | 5.918325584 | 0.041036729 |
| SYCE1     | 0.033584267  | 6.135853506 | 0.041047253 |
| GPR114    | 0.058553127  | 6.270257495 | 0.041097286 |
| PAPLN     | 0.079213956  | 6.257814995 | 0.041101658 |
| EFEMP2    | 0.109281535  | 10.19564201 | 0.04111303  |
| LOC90624  | 0.133698998  | 7.596155589 | 0.041127514 |
| LOC643000 | -0.054355215 | 6.004549834 | 0.041198895 |
| LOC650914 | -0.058264822 | 5.941393304 | 0.041210696 |
| LOC651730 | 0.055357003  | 5.991989686 | 0.041216939 |
| ZNF320    | 0.089930094  | 6.605696575 | 0.041261356 |
| LOC642698 | 0.052895552  | 5.983154379 | 0.041282912 |
| ABCA13    | -0.058888813 | 5.991995591 | 0.041293311 |
| PATE      | 0.054131127  | 6.302991405 | 0.04130951  |
| TOMM7     | 0.076830087  | 13.2820507  | 0.041324892 |
| ITPRIPL2  | -0.286746236 | 8.916086442 | 0.041330883 |
| LOC646723 | -0.13746987  | 6.89108258  | 0.041340388 |
| UBE1DC1   | 0.06516629   | 7.088520176 | 0.041530406 |
| SFMBT1    | 0.054743662  | 6.908824993 | 0.041546966 |
| RBED1     | 0.078500867  | 6.761618698 | 0.041572776 |
| LOC145820 | -0.065763451 | 6.435307673 | 0.041596416 |
| CHGA      | -0.053008244 | 6.08152798  | 0.041642438 |
| LOC285047 | -0.052966818 | 6.011184947 | 0.041678982 |
| NRG3      | 0.055690319  | 6.100841068 | 0.041692845 |
| ATP5H     | 0.067222166  | 13.16361257 | 0.041769712 |
| LOC643334 | 0.046021655  | 6.050870227 | 0.041791172 |
| CXCL9     | -0.232906083 | 6.56615765  | 0.041793992 |
| LOC389293 | 0.173886422  | 8.78503798  | 0.041823217 |
| ADIG      | -0.055475426 | 6.233555868 | 0.041831599 |
| SCN3A     | 0.090155365  | 8.290059928 | 0.041883066 |
| LOC650526 | -0.053085422 | 6.144007947 | 0.041888303 |
| CCNF      | -0.070881074 | 6.459697448 | 0.041891152 |
| RPL10A    | -0.097929322 | 12.26156566 | 0.04193899  |

## DEG.infomation

|           |              |             |             |
|-----------|--------------|-------------|-------------|
| SPPL2B    | 0.035926807  | 6.202323552 | 0.041953884 |
| LOC650548 | 0.05280365   | 6.021564858 | 0.041962391 |
| TAF5L     | -0.055354858 | 6.103158668 | 0.042016827 |
| PCGF1     | 0.092651619  | 7.516736314 | 0.042017279 |
| ATP13A3   | -0.062919224 | 6.319055395 | 0.042053896 |
| LOC653086 | -0.138197984 | 8.559776828 | 0.042055338 |
| ODF2L     | 0.047129729  | 6.46135295  | 0.042100053 |
| CBWD5     | -0.108493113 | 7.438162433 | 0.042155586 |
| SDR-O     | 0.042921545  | 5.988293306 | 0.042191731 |
| ETV1      | 0.073269579  | 6.241329059 | 0.042197549 |
| C16ORF33  | -0.109380319 | 10.45423309 | 0.042210343 |
| ZNF207    | -0.081572874 | 9.543377829 | 0.042237693 |
| GNGT2     | -0.049677687 | 6.270233764 | 0.042242684 |
| LOC643740 | -0.049127345 | 6.242203051 | 0.042256401 |
| GFRA2     | -0.079033388 | 7.468224682 | 0.042285347 |
| LOC647954 | -0.085275035 | 6.688525563 | 0.042301714 |
| TIPRL     | 0.067844714  | 7.848436553 | 0.042341555 |
| KIAA1279  | 0.103098174  | 8.677270229 | 0.042359047 |
| PARS2     | 0.064817648  | 6.425786077 | 0.042380548 |
| KLHL26    | 0.054509641  | 6.578592953 | 0.042391368 |
| C2ORF32   | -0.077693474 | 6.800154725 | 0.042394433 |
| C20ORF100 | -0.148519606 | 7.769136262 | 0.042434827 |
| SIDT1     | -0.053388223 | 6.033004703 | 0.042459795 |
| PEX3      | 0.065750659  | 6.21286729  | 0.042515899 |
| LOC389983 | 0.053422577  | 6.045938751 | 0.042552014 |
| TSPAN11   | -0.035998051 | 6.00983613  | 0.042562085 |
| SNORD64   | -0.055236282 | 6.010521796 | 0.04256735  |
| CMTM5     | 0.050714815  | 6.08075599  | 0.042599718 |
| LOC728825 | 0.077988147  | 6.645775121 | 0.042623933 |
| LOC646111 | 0.049612655  | 6.004411959 | 0.042627969 |
| RORB      | -0.1442631   | 6.451496612 | 0.042673577 |
| DQX1      | 0.056995325  | 6.085790286 | 0.042675758 |
| C14ORF79  | 0.070283417  | 6.662464631 | 0.042681343 |
| NAE1      | 0.077453935  | 8.527482776 | 0.042684867 |
| FPGT      | 0.050345494  | 6.04894897  | 0.042701371 |
| ADSL      | -0.103989449 | 10.5620253  | 0.04272905  |
| ERBB3     | -0.047257886 | 6.35713708  | 0.042768661 |
| TOX3      | -0.048429826 | 5.948057706 | 0.042804833 |
| C2ORF40   | 0.155814671  | 6.943838899 | 0.042822983 |
| MPFL      | 0.057776812  | 6.421587973 | 0.042840428 |
| PRKG1     | 0.040965344  | 6.107031833 | 0.04288168  |
| ZNF419    | 0.105161788  | 7.724392901 | 0.042955846 |
| LOC441440 | -0.047680883 | 5.967370185 | 0.042982129 |
| SYT5      | 0.049811762  | 6.089979137 | 0.042992661 |
| JARID1C   | -0.056794473 | 6.284563724 | 0.043010411 |
| TCHP      | 0.071299558  | 6.690059695 | 0.043163435 |
| RGP1      | 0.057709241  | 6.415524128 | 0.043198862 |
| MMEL1     | -0.03261923  | 6.050667697 | 0.043213234 |
| PSMD4     | 0.09954694   | 9.800506729 | 0.043236301 |
| MAP1B     | -0.220196525 | 7.711816553 | 0.043236497 |
| LOC649456 | 0.059150367  | 6.381982839 | 0.043237393 |

## DEG.infomation

|               |              |             |             |
|---------------|--------------|-------------|-------------|
| SDPR          | 0.160965797  | 10.07634536 | 0.043268821 |
| NAG18         | -0.09075076  | 13.17050824 | 0.043269568 |
| LOC730012     | -0.051815867 | 6.058723112 | 0.04327152  |
| DRAP1         | -0.115370799 | 9.93751314  | 0.043276913 |
| TMEM84        | 0.053652146  | 6.129886468 | 0.043303287 |
| ARL4D         | -0.05427547  | 6.302994697 | 0.043326895 |
| DKFZP58611420 | -0.059980662 | 6.750147617 | 0.043343251 |
| FLJ43752      | 0.050249218  | 6.188584358 | 0.043443187 |
| LOC729310     | 0.055583736  | 6.227906615 | 0.043478002 |
| RBP4          | -0.061584874 | 6.051927593 | 0.043508221 |
| LRRC31        | 0.060138518  | 6.303500054 | 0.043608075 |
| CNPY4         | 0.049189265  | 6.784201228 | 0.043644734 |
| FLJ45831      | 0.049621011  | 6.015703057 | 0.043684521 |
| LOC6444457    | 0.049385265  | 6.168370612 | 0.043704554 |
| ZNF460        | 0.050049915  | 6.510936288 | 0.04371818  |
| LOC643453     | -0.055214042 | 6.192893731 | 0.043729554 |
| LOC554175     | 0.036990688  | 6.069191262 | 0.043776277 |
| DOPEY2        | -0.096052869 | 7.947232551 | 0.043778618 |
| ATP5J         | 0.104341109  | 13.19775651 | 0.043806861 |
| RBN1          | 0.099275132  | 8.665779012 | 0.043826471 |
| G6PC          | 0.038879071  | 6.019421503 | 0.04383645  |
| METTL8        | -0.056751439 | 6.223256941 | 0.043842728 |
| LOC652204     | 0.047796735  | 6.068220511 | 0.043848115 |
| N4BP2         | -0.132306548 | 8.501391005 | 0.043922313 |
| LOC651986     | 0.05210701   | 5.925312078 | 0.043940237 |
| LOC442382     | -0.054091815 | 5.966840158 | 0.043986539 |
| SIGLEC12      | -0.034647399 | 6.174858116 | 0.043994763 |
| FZD5          | -0.059882284 | 6.398571332 | 0.044005142 |
| NCAPD2        | 0.080330723  | 7.343818228 | 0.044011608 |
| LOC643382     | 0.056695939  | 6.191476677 | 0.04401182  |
| SIX3          | 0.046342057  | 6.11782711  | 0.044065823 |
| LOC441046     | 0.057381018  | 6.406063461 | 0.044091384 |
| UBE2V2        | -0.1026093   | 8.03230532  | 0.044105016 |
| MOSPD1        | 0.133487195  | 7.107668376 | 0.044125667 |
| NUDT18        | 0.089560603  | 7.149651462 | 0.044138991 |
| LOC651850     | 0.045795697  | 6.126024933 | 0.044275683 |
| MX2           | -0.154676642 | 7.318402186 | 0.044284302 |
| RHOC          | -0.099429655 | 10.87952926 | 0.044293883 |
| FCRLB         | 0.071592175  | 6.605092204 | 0.044338997 |
| TSSC1         | -0.090971986 | 8.02759608  | 0.044343092 |
| MSH5          | -0.02642513  | 6.241076018 | 0.044352497 |
| HIST1H2BH     | -0.047207402 | 6.146261189 | 0.04440173  |
| C6ORF54       | -0.065430328 | 6.1455591   | 0.044428701 |
| AGXT2L2       | -0.05479484  | 7.212974523 | 0.044471026 |
| LOC728352     | 0.076093149  | 6.004171724 | 0.044513044 |
| PES1          | -0.12167492  | 6.522009616 | 0.044537643 |
| KRT6B         | 0.031784994  | 6.091548661 | 0.04455959  |
| KIAA0256      | 0.088633818  | 8.653688976 | 0.044615699 |
| MCMD1         | 0.052714796  | 6.231002181 | 0.044678925 |
| SNORD56B      | 0.050204431  | 6.038649601 | 0.044697702 |
| AKT2          | 0.065315375  | 6.279424473 | 0.044704811 |

## DEG.infomation

|           |              |             |             |
|-----------|--------------|-------------|-------------|
| LOC652857 | -0.04731261  | 5.921216012 | 0.044792807 |
| FLYWCH2   | 0.078046715  | 7.464774742 | 0.044798464 |
| P15RS     | 0.095843756  | 10.08000148 | 0.04481561  |
| OR10G7    | 0.056213886  | 6.184583575 | 0.044840248 |
| LOC390259 | 0.047549671  | 6.074698348 | 0.044842503 |
| ZNF35     | -0.066174537 | 7.22931407  | 0.04485341  |
| C18ORF32  | 0.189403747  | 7.525785512 | 0.044907835 |
| LOC441996 | 0.053774257  | 6.085915948 | 0.044952105 |
| FLJ20628  | 0.100408657  | 7.458318463 | 0.044967408 |
| EIF2C4    | 0.055966796  | 6.747855523 | 0.04497922  |
| LOC652046 | 0.04820537   | 6.106244185 | 0.045007065 |
| KRT3      | 0.053668828  | 6.268109167 | 0.045028405 |
| ICT1      | 0.159897839  | 8.796228097 | 0.045045533 |
| HMGB1     | 0.110600396  | 7.175508223 | 0.045056012 |
| CACNA2D4  | -0.04469817  | 6.22974981  | 0.045119446 |
| CTNNB1    | 0.078223266  | 7.061059059 | 0.045171799 |
| SPATA2    | -0.059380316 | 6.673487269 | 0.045212765 |
| ATP6V0D1  | -0.105130616 | 9.206650008 | 0.045215585 |
| MCF2      | 0.093281245  | 6.244704413 | 0.045239126 |
| GOLGA8B   | 0.153388008  | 8.387893119 | 0.045263508 |
| PPIA      | -0.071813399 | 6.889146701 | 0.045264293 |
| C4ORF19   | 0.054317749  | 6.440621052 | 0.045277302 |
| GPT2      | -0.148863374 | 8.25607002  | 0.045328747 |
| GOLGA3    | 0.097841259  | 9.825135013 | 0.04538992  |
| BCS1L     | 0.075149132  | 8.648978012 | 0.045390451 |
| DENND3    | -0.089426613 | 6.945236635 | 0.045427355 |
| PCYOX1L   | 0.080762961  | 6.179106386 | 0.04546068  |
| CMYA3     | 0.206474537  | 7.059048568 | 0.045513743 |
| HP1BP3    | -0.065912693 | 6.534400425 | 0.045537131 |
| ARSK      | 0.061571415  | 6.482317146 | 0.045657327 |
| LOC651745 | 0.052962996  | 6.062579973 | 0.045698039 |
| LOC645364 | 0.065201484  | 5.90523479  | 0.045699417 |
| FAM153B   | -0.112963704 | 7.42070279  | 0.045707603 |
| CAMKK2    | -0.061380244 | 6.166145124 | 0.045750798 |
| PLEKHA3   | 0.10326037   | 7.378455852 | 0.045753136 |
| RPL28     | -0.073923817 | 6.696441787 | 0.045844343 |
| CUTA      | 0.078537743  | 9.779001112 | 0.045869097 |
| F8A3      | -0.056111283 | 6.113297584 | 0.045886246 |
| DCDC2     | 0.051204344  | 5.981127327 | 0.045919689 |
| LOC153684 | 0.048813271  | 6.243629864 | 0.045959196 |
| CSRP1     | -0.160958601 | 9.148994703 | 0.046020377 |
| LOC653197 | 0.053924487  | 6.090464019 | 0.046177836 |
| MX1       | -0.215476609 | 10.11955358 | 0.04618008  |
| TLX2      | -0.039826663 | 5.953542929 | 0.046252233 |
| OR2M7     | -0.048810073 | 5.94820974  | 0.046375997 |
| SAMHD1    | -0.056457498 | 6.10543012  | 0.04642069  |
| D2HGDH    | 0.126751114  | 9.101884046 | 0.046458634 |
| TSHZ1     | 0.084587133  | 7.856500659 | 0.046469131 |
| CACNA1E   | -0.049230232 | 6.021508789 | 0.046536571 |
| RPS9      | -0.118465969 | 11.95263807 | 0.046539745 |
| ZNF572    | 0.048976942  | 6.103776472 | 0.046553764 |

## DEG.infomation

|           |              |             |             |
|-----------|--------------|-------------|-------------|
| CLEC9A    | 0.034665546  | 6.087541476 | 0.046556731 |
| VPS25     | 0.087695225  | 8.081285573 | 0.046563232 |
| PFDN5     | 0.101614966  | 11.76297341 | 0.046569236 |
| OR10Z1    | -0.044416003 | 6.025620747 | 0.046661767 |
| ZNF142    | 0.13446829   | 7.090997906 | 0.046692459 |
| LOC643686 | 0.049268501  | 6.127378906 | 0.046737106 |
| LOC645752 | 0.058895292  | 6.120310836 | 0.046753093 |
| CXXC4     | 0.123106301  | 6.396584575 | 0.046768372 |
| BRI3BP    | -0.046780639 | 6.507584279 | 0.046788532 |
| LOC642666 | -0.041553253 | 6.047901589 | 0.04679161  |
| CNFN      | 0.063148665  | 6.549526599 | 0.046826718 |
| LOC645535 | 0.051934536  | 6.391920513 | 0.046897354 |
| COX6BP1   | -0.051726007 | 6.105631754 | 0.046915079 |
| ZNF791    | 0.102051451  | 7.652233304 | 0.046941143 |
| PIGB      | 0.066722184  | 6.866835497 | 0.046962223 |
| TMEM48    | -0.058936881 | 6.345253096 | 0.046988893 |
| BAT2      | -0.091765802 | 8.062597401 | 0.046988994 |
| AMZ1      | 0.044536432  | 6.191192424 | 0.047037468 |
| NKRF      | 0.069234118  | 7.237855173 | 0.047056852 |
| CC2D2B    | 0.049093875  | 6.104524896 | 0.047119383 |
| C11ORF80  | 0.099307381  | 6.768488183 | 0.047150944 |
| RPL39     | -0.10815991  | 12.86439678 | 0.047205605 |
| TSPAN7    | -0.121054622 | 7.971161184 | 0.047207397 |
| LOC643430 | -0.054688135 | 6.013576661 | 0.047212567 |
| MARCH8    | 0.034228262  | 6.079023637 | 0.04725477  |
| RAB42     | -0.057625722 | 6.208418339 | 0.04725769  |
| KIAA1033  | 0.109404343  | 6.31751431  | 0.047259449 |
| AP2A1     | -0.040378222 | 6.598560454 | 0.047267057 |
| NPAS2     | -0.117967368 | 7.739097325 | 0.047273916 |
| MADCAM1   | 0.035751121  | 6.110396072 | 0.047306927 |
| EIF3IP1   | 0.047491885  | 6.255744107 | 0.047322962 |
| SLC2A13   | -0.056036802 | 6.066336053 | 0.047351172 |
| FAM114A2  | 0.054052213  | 6.755030223 | 0.047363841 |
| FASTKD2   | 0.090148645  | 7.934169324 | 0.047370409 |
| LOC646585 | 0.056016815  | 6.082869923 | 0.047421346 |
| SASH1     | -0.098429801 | 8.753680488 | 0.047426901 |
| SLC4A8    | 0.036497411  | 6.144410484 | 0.047467049 |
| PRPSAP1   | -0.089928819 | 9.629798285 | 0.047533283 |
| SFRS8     | 0.073011985  | 7.368532854 | 0.047537415 |
| TMEM77    | 0.074396511  | 7.457820945 | 0.047537492 |
| LOC388237 | -0.034295424 | 6.201824519 | 0.047559444 |
| ATP6V0B   | -0.094086952 | 9.847525528 | 0.047566561 |
| LOC286208 | 0.126526293  | 7.178506039 | 0.047568614 |
| PPIH      | 0.120676951  | 8.173506839 | 0.04759419  |
| TMEM176B  | 0.142102189  | 7.00336944  | 0.047630002 |
| APOA4     | -0.046968157 | 5.919339593 | 0.047642566 |
| LOC440055 | -0.139363611 | 10.30988467 | 0.047670625 |
| ARSJ      | 0.073082135  | 6.330437565 | 0.047723861 |
| CD99      | -0.16288262  | 8.88660287  | 0.047732833 |
| EXOD1     | 0.052013967  | 6.184443198 | 0.047733042 |
| TMEM117   | 0.103826795  | 7.114410325 | 0.047775893 |



## DEG.infomation

|           |              |             |             |
|-----------|--------------|-------------|-------------|
| C20ORF86  | 0.059643521  | 6.20096479  | 0.04781617  |
| LOC731102 | 0.060653505  | 6.180897451 | 0.047840195 |
| C6ORF114  | -0.072261292 | 6.056127532 | 0.047881649 |
| LOC649639 | 0.077607275  | 6.522520293 | 0.047891007 |
| TOLLIP    | 0.073983701  | 7.600879651 | 0.048015089 |
| FAM103A1  | -0.081039772 | 7.76619775  | 0.048067524 |
| SLC12A6   | 0.040363111  | 6.14718762  | 0.048156648 |
| CCDC124   | -0.079254402 | 7.409385816 | 0.048158345 |
| FLJ10490  | 0.051409037  | 6.185486995 | 0.048195762 |
| PHF6      | 0.03223934   | 6.085523911 | 0.048251107 |
| TRAM1L1   | 0.060239293  | 6.177727251 | 0.048271364 |
| TFIP11    | 0.06089422   | 7.539772596 | 0.048334267 |
| LOC654103 | -0.092309626 | 8.475984674 | 0.048356117 |
| PRY       | -0.044571311 | 6.02747122  | 0.048357731 |
| ARMCX4    | 0.057992534  | 6.306682825 | 0.048362248 |
| NSUN2     | -0.10055781  | 9.88829526  | 0.048422643 |
| SNX17     | -0.080010424 | 9.714665878 | 0.04842795  |
| HMG3      | 0.051249196  | 6.325732071 | 0.048454434 |
| OR10A5    | -0.052669948 | 5.826301121 | 0.048507413 |
| CPNE6     | 0.050895238  | 6.127632854 | 0.04867718  |
| LOC642953 | 0.044816419  | 6.05903017  | 0.04871474  |
| THAP3     | 0.055988661  | 6.20720739  | 0.048733391 |
| C16ORF14  | 0.160982671  | 9.100210428 | 0.048882501 |
| LOC643138 | 0.05452541   | 6.138542049 | 0.048888173 |
| TAS2R38   | -0.055149546 | 6.263455132 | 0.04891266  |
| CD207     | -0.054609979 | 6.02221469  | 0.04892702  |
| RNF4      | -0.060308271 | 7.436739966 | 0.048936671 |
| MAN2A1    | -0.061596991 | 6.589457387 | 0.049047418 |
| CCDC24    | 0.072935902  | 6.439207841 | 0.049071325 |
| LOC645602 | 0.055217099  | 5.951623593 | 0.049103029 |
| FAM39DP   | -0.070392947 | 8.09356472  | 0.049142993 |
| HLA-DPB1  | -0.114066502 | 6.592576958 | 0.049148175 |
| CRYL1     | 0.106959676  | 7.617493869 | 0.049159041 |
| FAM131B   | 0.072033441  | 6.420414559 | 0.049185664 |
| KHK       | -0.028878755 | 6.165360086 | 0.049189126 |
| GAS2L2    | 0.039487224  | 6.075563824 | 0.049213938 |
| OR5M10    | 0.040749915  | 6.115365116 | 0.049261639 |
| FSTL1     | -0.177678266 | 9.587451685 | 0.049277399 |
| C21ORF42  | 0.045900504  | 6.181839307 | 0.049280931 |
| GALNT10   | -0.042138679 | 6.519072895 | 0.049291785 |
| LOC126536 | -0.044901209 | 6.182029617 | 0.049493194 |
| C20ORF20  | -0.086684231 | 9.247891814 | 0.049510942 |
| FLJ41170  | -0.050180274 | 6.041608033 | 0.04951463  |
| NPC2      | -0.101690247 | 12.31905501 | 0.049520477 |
| LOC647006 | -0.046552779 | 6.035542948 | 0.049553899 |
| PXMP2     | -0.143125243 | 9.053026999 | 0.049561628 |
| PPIL6     | -0.0669605   | 6.308454224 | 0.049607083 |
| ESPNL     | 0.167535044  | 6.364960662 | 0.049631247 |
| KRT17     | 0.063509035  | 6.098368136 | 0.049651079 |
| LOC440737 | -0.115653111 | 11.14524364 | 0.049655558 |
| LOC643951 | -0.044393264 | 6.041943055 | 0.049703374 |

## DEG.infomation

|           |              |             |             |
|-----------|--------------|-------------|-------------|
| STH       | 0.047793364  | 6.37884059  | 0.04980546  |
| LOC650321 | 0.12377906   | 6.515270486 | 0.049809421 |
| COX5A     | -0.078500564 | 13.81251154 | 0.049939396 |
| ZNF574    | 0.049494328  | 6.289751304 | 0.049978276 |
| LMF2      | -0.072656488 | 7.864514222 | 0.049978618 |
| C19ORF2   | 0.067235228  | 10.07479197 | 0.050003981 |
| ZNF771    | 0.034584399  | 6.190626033 | 0.050037381 |
| LOC652586 | -0.04649733  | 5.972004121 | 0.050051713 |
| LOC644094 | 0.056401921  | 6.287503127 | 0.05005537  |
| MTERFD2   | 0.053971832  | 6.497402387 | 0.050119544 |
| MS4A8B    | 0.050875505  | 6.02902595  | 0.050122695 |
| LOC653689 | -0.05510621  | 6.214314274 | 0.050182418 |
| SAMD9     | 0.119209891  | 7.303373737 | 0.0501892   |
| NELL2     | 0.051227954  | 6.04729554  | 0.050288144 |
| CDC20     | -0.084288262 | 6.514857972 | 0.050294665 |
| LBX1      | 0.033103108  | 5.959102009 | 0.050453494 |
| LOC653643 | 0.051560685  | 6.172525702 | 0.050480741 |
| LIMS2     | 0.12603133   | 9.070867297 | 0.050482832 |
| CLCN5     | -0.048803513 | 6.135034955 | 0.050528185 |
| CCDC40    | 0.035743664  | 6.102626059 | 0.050549387 |
| ITGA8     | 0.095375039  | 6.199846345 | 0.050637576 |
| LOC645914 | -0.047772249 | 5.887432879 | 0.050658449 |
| C17ORF59  | 0.072818914  | 6.74553415  | 0.050676663 |
| ZFPL1     | -0.060727026 | 7.058420835 | 0.050705738 |
| LOC641804 | -0.051805966 | 6.206229424 | 0.050766244 |
| LOC647691 | -0.080920775 | 6.642236359 | 0.05076778  |
| LOC375010 | 0.047478198  | 5.931750678 | 0.050787    |
| VPS37A    | 0.080381868  | 8.635371681 | 0.050847796 |
| ART4      | -0.076167622 | 6.823901089 | 0.050850995 |
| LOC641741 | 0.044246073  | 6.05446557  | 0.050856701 |
| ARL14     | 0.057413997  | 6.219134775 | 0.050863766 |
| SEZ6L2    | 0.035515537  | 6.107457657 | 0.050870045 |
| WDR85     | 0.057087685  | 6.537963613 | 0.050872134 |
| RABL5     | 0.058491638  | 6.184540768 | 0.050933292 |
| LOC728248 | 0.048635815  | 5.934360819 | 0.05094715  |
| LOC644744 | 0.049135919  | 6.020447015 | 0.050978182 |
| LOC644624 | 0.028561894  | 6.164295256 | 0.051116661 |
| SFPQ      | -0.134190836 | 6.665829472 | 0.05112743  |
| YME1L1    | 0.108482452  | 8.724167363 | 0.05115064  |
| MAGED1    | 0.073612968  | 9.754371077 | 0.05120233  |
| NUDT21    | 0.079404968  | 7.467415515 | 0.051238691 |
| LOC652814 | 0.048175445  | 6.120215193 | 0.051305014 |
| OPN1SW    | -0.051589509 | 6.131927194 | 0.051347636 |
| KPNA3     | 0.095291085  | 9.085330111 | 0.051356433 |
| MRPS28    | 0.116027225  | 9.904114167 | 0.051365995 |
| GAA       | 0.091888792  | 7.443950486 | 0.051383602 |
| C9ORF130  | -0.108628555 | 7.791749657 | 0.051383724 |
| LMO3      | 0.081434859  | 6.309884275 | 0.051393352 |
| ARFGEF2   | -0.054965421 | 6.60941844  | 0.051394945 |
| SSBP3     | -0.060271865 | 6.673980241 | 0.051424172 |
| CCDC72    | 0.085102345  | 11.54458838 | 0.051462019 |

## DEG.infomation

|           |              |             |             |
|-----------|--------------|-------------|-------------|
| ADCY7     | -0.059255475 | 6.672509142 | 0.051497431 |
| TTC24     | 0.054165738  | 6.080673844 | 0.05151299  |
| CD164     | -0.17410189  | 6.970254259 | 0.051597122 |
| ETS1      | -0.124824981 | 10.01882037 | 0.051661496 |
| PDE9A     | -0.038865583 | 6.378040887 | 0.051746165 |
| C19ORF31  | -0.098692496 | 13.49864192 | 0.051787766 |
| LRIG2     | -0.057848965 | 6.922770336 | 0.051839788 |
| RHOF      | -0.071066731 | 6.287797734 | 0.051851748 |
| TMEM68    | 0.052445396  | 6.316851941 | 0.051860998 |
| TRIM36    | 0.027495661  | 6.148248314 | 0.051936683 |
| MRPL24    | -0.069116502 | 9.89181229  | 0.051958887 |
| SEPX1     | 0.104204633  | 10.4169595  | 0.052000874 |
| ADCYAP1R1 | 0.046056358  | 6.027571002 | 0.052048874 |
| POU5F1    | 0.040558268  | 6.015350073 | 0.052075288 |
| LOC643817 | 0.047658031  | 6.154555407 | 0.052127303 |
| CAPN14    | 0.054533926  | 6.146865325 | 0.052133948 |
| INO80B    | -0.061618752 | 6.807300788 | 0.052162194 |
| LOC641815 | -0.047233896 | 5.960574756 | 0.052177344 |
| NEB       | 0.187495823  | 6.485486214 | 0.052179344 |
| PTMA      | -0.273664374 | 8.151996365 | 0.052199446 |
| METRNL    | -0.094934303 | 8.318880118 | 0.05222734  |
| DNAH10    | 0.032711423  | 6.069959681 | 0.052292609 |
| FLJ32679  | 0.027694373  | 6.087798491 | 0.052312336 |
| LOC402160 | -0.038279832 | 6.039552626 | 0.05231489  |
| LOC642432 | 0.073267822  | 6.299510979 | 0.052395869 |
| FLJ22662  | 0.092432083  | 9.194870167 | 0.052408631 |
| NSBP1     | 0.042470202  | 6.301388429 | 0.052422349 |
| CD247     | 0.096116065  | 6.649837832 | 0.052444304 |
| CTSO      | 0.160449699  | 8.21415487  | 0.052468446 |
| HAGHL     | -0.063783792 | 6.527549292 | 0.052472461 |
| LOC441873 | 0.06377912   | 6.026622952 | 0.052521398 |
| CIDEA     | -0.065619954 | 6.128209437 | 0.052533039 |
| SLC30A7   | -0.089525496 | 7.775696704 | 0.052560158 |
| SAE1      | 0.084752126  | 11.14241039 | 0.052568764 |
| SCGB1D4   | -0.049242202 | 5.960302241 | 0.052726257 |
| DAPK2     | 0.10323461   | 7.066467756 | 0.052748054 |
| SNX27     | -0.08810094  | 9.694196516 | 0.0528119   |
| ACVR1     | -0.104060644 | 9.323075659 | 0.052873238 |
| BRIP1     | 0.06048393   | 6.239736611 | 0.05287351  |
| C9ORF64   | 0.074145863  | 7.04714951  | 0.052883643 |
| SYMPK     | 0.107436575  | 6.891716181 | 0.052932822 |
| CSNK2A1   | -0.080289387 | 7.698397591 | 0.052950252 |
| FBXW9     | -0.070674246 | 7.021001198 | 0.052973831 |
| NDUFA5    | 0.122526499  | 6.430087157 | 0.053035911 |
| EPGN      | -0.073202547 | 7.000045675 | 0.053039954 |
| NHS       | 0.030379237  | 6.195188936 | 0.053057765 |
| RBM18     | 0.093554824  | 8.143520575 | 0.053065031 |
| SNORA66   | -0.053509366 | 5.992863157 | 0.053067319 |
| ZMAT3     | -0.131465503 | 10.6412226  | 0.053098062 |
| CNTN5     | 0.032924176  | 5.987293766 | 0.053269696 |
| VPS28     | -0.080475481 | 9.200183951 | 0.05333542  |

## DEG.infomation

|           |              |             |             |
|-----------|--------------|-------------|-------------|
| EYA3      | -0.031713725 | 6.102714672 | 0.053379718 |
| LOC646358 | 0.051530018  | 6.220199685 | 0.053383753 |
| NUP54     | 0.079022664  | 7.806259216 | 0.053440283 |
| LOC285941 | -0.054181396 | 6.233775936 | 0.053467544 |
| LOC643687 | -0.052376513 | 5.968295844 | 0.053476278 |
| IL9R      | -0.046767456 | 5.996273608 | 0.053488813 |
| LOC653145 | -0.025930161 | 5.969278798 | 0.053515186 |
| HIPK3     | 0.063029708  | 6.55131187  | 0.053540906 |
| C21ORF45  | 0.065100519  | 6.256031848 | 0.053560983 |
| NR1H3     | -0.087661611 | 7.903699573 | 0.05364598  |
| C14ORF4   | -0.141895965 | 8.742405355 | 0.05367942  |
| IL25      | 0.04339329   | 6.125552758 | 0.053686057 |
| LOC389895 | 0.04813253   | 6.125624952 | 0.053709298 |
| GEMIN6    | -0.077375141 | 7.800872713 | 0.053729286 |
| LOC730740 | 0.091276143  | 11.20743043 | 0.053764359 |
| BTN3A2    | -0.095313661 | 6.887452672 | 0.053770469 |
| OR2L3     | 0.053026881  | 6.266806147 | 0.053775113 |
| SCN10A    | -0.052691263 | 6.039221491 | 0.053821593 |
| WISP2     | -0.175922923 | 7.010752811 | 0.053839594 |
| LOC644276 | -0.04734572  | 6.226186176 | 0.053880719 |
| KEAP1     | -0.071186326 | 8.380771967 | 0.053889433 |
| ADAMTS8   | -0.09568755  | 6.173742182 | 0.053889906 |
| LOC652152 | 0.047956642  | 6.095266821 | 0.05393728  |
| SMN1      | 0.043791573  | 6.306621988 | 0.053997497 |
| LOC400304 | 0.152939726  | 7.157726455 | 0.054059414 |
| CGGBP1    | -0.082542865 | 8.814556268 | 0.054070018 |
| FBXO10    | 0.038310035  | 6.243520577 | 0.054070714 |
| CGB7      | 0.040052738  | 6.074958029 | 0.054109183 |
| KIR2DL1   | -0.037136168 | 6.052459988 | 0.054129581 |
| ZNF721    | 0.105729083  | 8.031516417 | 0.054160417 |
| LOC643329 | 0.046262644  | 6.033526347 | 0.054161203 |
| VAV3      | -0.065014289 | 6.371574298 | 0.054229621 |
| SEPT4     | -0.096540397 | 7.942010131 | 0.054275213 |
| SMARCAL1  | 0.074007088  | 7.717134632 | 0.054322639 |
| LOC653886 | -0.04647586  | 6.166799785 | 0.054330733 |
| AHSA1     | -0.129088839 | 9.339420494 | 0.054344711 |
| ATOH1     | -0.05150352  | 6.053381063 | 0.054359244 |
| ENTPD3    | 0.042915988  | 6.177102396 | 0.054394664 |
| ST7L      | 0.0456593    | 6.410636939 | 0.054432145 |
| LOC654000 | 0.038232241  | 6.379240339 | 0.054577169 |
| LRRC67    | 0.060958677  | 6.041502475 | 0.054585465 |
| MSLN      | -0.06770434  | 6.019668961 | 0.05462436  |
| SUMO1     | 0.073924454  | 6.308819088 | 0.054644675 |
| C1ORF102  | 0.053363982  | 6.503279052 | 0.054652112 |
| PSMB5     | -0.104543281 | 10.28426199 | 0.05469588  |
| AUTS2     | 0.09186036   | 8.307126774 | 0.054700751 |
| WDSOF1    | -0.0856526   | 6.480314615 | 0.054718199 |
| COL4A2    | -0.185505509 | 8.027044495 | 0.054799562 |
| STAM2     | 0.074763022  | 7.017826604 | 0.054810149 |
| ZNF280D   | 0.052529894  | 6.898162061 | 0.054821537 |
| ATP2B4    | -0.120528795 | 9.789722452 | 0.054834997 |

## DEG.infomation

|           |              |             |             |
|-----------|--------------|-------------|-------------|
| FLJ43763  | 0.045869858  | 5.966591548 | 0.054854554 |
| CARD9     | -0.070448999 | 8.098439815 | 0.05490388  |
| LOC646129 | -0.048001204 | 6.020434484 | 0.054965743 |
| LGALS9B   | -0.04080767  | 6.282725603 | 0.055000304 |
| LOC727927 | -0.04881654  | 6.260272601 | 0.055047664 |
| RBMV2EP   | -0.038627079 | 6.026017583 | 0.055051275 |
| MGC52000  | -0.110230759 | 8.210475238 | 0.055060453 |
| FLJ21865  | 0.078752247  | 7.387213213 | 0.055118842 |
| ALDH9A1   | 0.095687665  | 12.00995115 | 0.055160369 |
| LOC653107 | 0.023904729  | 6.06047321  | 0.055169472 |
| MED13     | 0.040731627  | 6.26600323  | 0.055259393 |
| C6ORF192  | 0.089525005  | 7.350462656 | 0.055355145 |
| TSPYL5    | -0.100970671 | 8.389083084 | 0.055371361 |
| GRIN2D    | 0.05765522   | 5.975942875 | 0.055426564 |
| NCF1B     | 0.044579712  | 5.94446076  | 0.05548469  |
| FOXM1     | -0.039995128 | 6.025780765 | 0.055602795 |
| CLN6      | -0.056175596 | 6.352362274 | 0.055637227 |
| OR2A2     | 0.048582511  | 6.111733832 | 0.05564457  |
| LOC650325 | -0.049275698 | 6.104722081 | 0.05568852  |
| RPLP0P2   | 0.050325496  | 6.039561663 | 0.055803192 |
| TMEM31    | -0.049023528 | 6.229010132 | 0.055828109 |
| LOC642821 | 0.050802734  | 6.080326124 | 0.055829988 |
| PFKP      | -0.144298175 | 10.58417637 | 0.055836548 |
| ARID3A    | -0.081191927 | 7.15117755  | 0.055864091 |
| ZNF818    | 0.053063644  | 6.004265921 | 0.055868123 |
| DCHS1     | 0.070621186  | 6.814879923 | 0.05591498  |
| RBMX      | 0.103585046  | 8.9005933   | 0.055915725 |
| ZDHC13    | 0.051495567  | 6.604696914 | 0.056012532 |
| GLB1L     | 0.058071814  | 6.393393446 | 0.056054881 |
| RSU1      | -0.098232143 | 8.378657976 | 0.056080734 |
| USP41     | 0.030863536  | 6.216433338 | 0.056152341 |
| LOC645927 | 0.045206349  | 6.106486688 | 0.056217144 |
| THSD1P    | 0.042938617  | 6.144405375 | 0.056218554 |
| LOC642757 | 0.046238261  | 5.989373972 | 0.056222453 |
| GPR50     | 0.05300662   | 6.032139903 | 0.056225815 |
| TSPY1     | 0.038984908  | 5.96147061  | 0.056228304 |
| C9ORF96   | 0.052242737  | 6.081442087 | 0.056242865 |
| MGC57346  | 0.064142294  | 6.962577536 | 0.056273606 |
| LRR44     | 0.044785507  | 6.031212375 | 0.056279933 |
| TRIM63    | -0.203476587 | 9.878936849 | 0.056344445 |
| LOC728005 | 0.037692364  | 6.054142073 | 0.056419349 |
| CDK9      | -0.100894141 | 7.715640572 | 0.056433955 |
| SEC14L4   | 0.065747146  | 6.048757198 | 0.056503504 |
| CYYR1     | -0.09511152  | 8.528473615 | 0.056524239 |
| CHRFAM7A  | -0.029286066 | 6.043087089 | 0.056554523 |
| PNPLA8    | -0.115183082 | 7.79843826  | 0.056611771 |
| TOM1L1    | 0.055681936  | 6.169629868 | 0.056674317 |
| TCP10L    | 0.056951459  | 6.818284385 | 0.056712224 |
| AAK1      | 0.092383989  | 7.017296939 | 0.056775849 |
| PRODH2    | -0.058043003 | 5.989502524 | 0.056806038 |
| GABRP     | 0.049788408  | 6.229032513 | 0.056833656 |

## DEG.infomation

|           |              |             |             |
|-----------|--------------|-------------|-------------|
| MINPP1    | 0.084588355  | 6.859540456 | 0.056879319 |
| PDCD5     | -0.099276799 | 9.813112639 | 0.056886521 |
| CNOT3     | 0.085969484  | 7.055907893 | 0.056906841 |
| NOL7      | -0.150961774 | 11.43677793 | 0.056919516 |
| SUSD4     | -0.098710884 | 6.195573937 | 0.056945856 |
| LOC643109 | -0.051996901 | 6.112101673 | 0.056971476 |
| SERINC3   | 0.066857634  | 8.213899004 | 0.057036263 |
| SALL1     | -0.052450057 | 5.971455374 | 0.057040894 |
| HES5      | 0.115926992  | 6.8043744   | 0.057043621 |
| ALKBH8    | 0.058678631  | 6.486703246 | 0.057136601 |
| TBX4      | -0.049340496 | 5.951952954 | 0.057158203 |
| C19ORF6   | -0.093185146 | 7.900415889 | 0.057163153 |
| RCAN2     | 0.112883905  | 12.03502966 | 0.057190759 |
| EXOSC7    | 0.112389473  | 8.688802337 | 0.057199814 |
| POP1      | -0.073730945 | 6.295267967 | 0.057215828 |
| LOC390712 | -0.045245175 | 5.903865532 | 0.05731455  |
| HYDIN     | 0.014755761  | 6.080702406 | 0.05735381  |
| LOC645351 | 0.058301441  | 6.258504689 | 0.057356403 |
| ACSL1     | 0.191026473  | 10.17022915 | 0.057365191 |
| LOC644403 | 0.046679069  | 6.184323631 | 0.057424283 |
| KIN       | 0.056850727  | 6.203280351 | 0.05751429  |
| ZNF28     | 0.038903408  | 6.282650033 | 0.057551571 |
| KIAA1377  | 0.047742397  | 6.10934684  | 0.057560113 |
| LOC652565 | -0.052431201 | 6.450310138 | 0.057588    |
| LASS4     | 0.078266032  | 6.599294224 | 0.057630204 |
| NRXN2     | 0.057260512  | 6.375334697 | 0.057652184 |
| DENND2A   | 0.101308071  | 8.334343277 | 0.057660936 |
| BRUNOL6   | 0.058411968  | 6.475793932 | 0.057661925 |
| DGCR2     | 0.101216626  | 8.11004872  | 0.057675676 |
| LOC643222 | 0.042309128  | 6.074627749 | 0.057678968 |
| OR6W1P    | 0.052836515  | 5.990571569 | 0.057681781 |
| DMRT3     | -0.047784657 | 5.951665079 | 0.057733602 |
| MESDC2    | -0.047703419 | 6.179136042 | 0.057740444 |
| ATF1      | 0.080840516  | 6.833688383 | 0.057750086 |
| APBB1     | 0.038801919  | 6.086828211 | 0.057756186 |
| EPHB3     | 0.060391208  | 6.589638106 | 0.057763482 |
| KRTAP10-4 | 0.048880725  | 6.066679886 | 0.057767826 |
| CEP70     | 0.073034577  | 6.917701139 | 0.0577715   |
| NKAPL     | 0.038398757  | 6.216149005 | 0.057804285 |
| C1ORF89   | 0.063424893  | 6.547346728 | 0.057806591 |
| HTR6      | 0.071834395  | 6.223797507 | 0.057819354 |
| PELI3     | 0.063315145  | 6.290576552 | 0.057845123 |
| MS4A13    | -0.032831104 | 6.006301731 | 0.057887602 |
| SLCO1C1   | -0.035762141 | 6.069452949 | 0.057935827 |
| ZNF559    | 0.100170686  | 8.011624984 | 0.057990952 |
| DGKQ      | -0.069079917 | 7.256630573 | 0.058034479 |
| CDC73     | 0.048608469  | 6.357339081 | 0.058048051 |
| ITIH2     | 0.049419858  | 6.095263914 | 0.058106526 |
| FLJ33544  | 0.045695903  | 6.182687555 | 0.058121373 |
| SGSM3     | -0.070029629 | 6.795949819 | 0.058150797 |
| LOC645848 | 0.051631898  | 6.269163973 | 0.058188408 |

## DEG.infomation

|           |              |             |             |
|-----------|--------------|-------------|-------------|
| PDP2      | -0.038741501 | 6.307034989 | 0.058196748 |
| LOC647571 | 0.042055059  | 6.097789637 | 0.058283411 |
| C10ORF73  | 0.143840248  | 7.515167264 | 0.058318574 |
| LOC256374 | 0.044848133  | 5.941075438 | 0.058343267 |
| LOC730456 | 0.074465411  | 5.974416811 | 0.05837545  |
| NTRK1     | -0.03037303  | 6.180821417 | 0.058376314 |
| SERPINB6  | -0.079784987 | 11.21754782 | 0.058421878 |
| CCDC18    | 0.04433142   | 6.229499195 | 0.058428813 |
| GK2       | 0.08999424   | 7.711943198 | 0.058429928 |
| LOC729047 | -0.047602814 | 5.941076382 | 0.058434753 |
| SLC6A5    | 0.045244834  | 5.953878579 | 0.058445535 |
| GORASP2   | -0.085274238 | 9.218230523 | 0.058469172 |
| ALKBH6    | 0.060816938  | 7.565971025 | 0.058469753 |
| EFCBP1    | 0.115803309  | 7.053383458 | 0.058518685 |
| KIR2DS3   | 0.045539643  | 6.021663553 | 0.058541292 |
| EIF2B5    | -0.073604893 | 9.008044204 | 0.05854182  |
| LOC647340 | 0.06485842   | 13.11611214 | 0.058565862 |
| GTF2H4    | 0.09624723   | 7.652834005 | 0.058572861 |
| FAM29A    | 0.042213269  | 6.050643322 | 0.058587787 |
| LOC646817 | 0.065215476  | 6.253591934 | 0.058649998 |
| MAN2B2    | 0.119708172  | 8.82659604  | 0.058666521 |
| RSPRY1    | -0.112754861 | 8.654367822 | 0.058695273 |
| ZNF212    | -0.079179152 | 7.518001095 | 0.058771005 |
| LOC647974 | -0.046376868 | 5.866557997 | 0.0588242   |
| C10ORF53  | -0.026848209 | 6.025516931 | 0.058893588 |
| CXORF40B  | -0.065067197 | 7.36930424  | 0.058910638 |
| C15ORF29  | 0.088748712  | 6.560696712 | 0.058942247 |
| DHRS9     | -0.209842732 | 6.738639466 | 0.058988959 |
| NLRP14    | -0.042121641 | 5.934852873 | 0.059037003 |
| FAM86C    | 0.052945673  | 6.761656885 | 0.059042493 |
| CPXCR1    | 0.033756034  | 6.095754876 | 0.059115219 |
| HIST2H2AB | 0.052856522  | 6.164848235 | 0.059158077 |
| CCDC44    | 0.072350945  | 10.20109136 | 0.059170131 |
| SLC9A7    | -0.050029653 | 6.29723874  | 0.059191311 |
| ZUFSP     | -0.061292756 | 6.946872815 | 0.059220651 |
| C1ORF86   | -0.07092415  | 8.032945812 | 0.05923482  |
| BCAS2     | 0.077298428  | 6.393448103 | 0.05925475  |
| ERAL1     | -0.098240785 | 9.017742874 | 0.059335417 |
| PIAS3     | -0.057515784 | 6.765182827 | 0.059351097 |
| KIRREL3   | -0.052314927 | 5.993578917 | 0.059400346 |
| LOC285733 | -0.054575616 | 6.124361083 | 0.05943873  |
| ZNF483    | -0.082296778 | 7.058839782 | 0.059444826 |
| LOC729715 | 0.047485728  | 6.258629188 | 0.059448265 |
| ATG16L2   | -0.073911599 | 6.588590265 | 0.059453106 |
| LOC645218 | 0.033521403  | 6.117685467 | 0.059526922 |
| LOC442251 | -0.046791854 | 5.991895723 | 0.059530291 |
| ABCC13    | -0.027952485 | 6.197744833 | 0.059585809 |
| FLJ34503  | 0.072255824  | 6.226759992 | 0.059634931 |
| PPAPDC1B  | -0.066187767 | 6.74112963  | 0.059658872 |
| LOC649923 | -0.088500932 | 6.070805048 | 0.059675636 |
| ZNF222    | 0.061097282  | 6.289438787 | 0.059721536 |

## DEG.infomation

|           |              |             |             |
|-----------|--------------|-------------|-------------|
| ABCC5     | -0.127384713 | 8.425704731 | 0.059737386 |
| ZFP64     | 0.033479261  | 6.370497637 | 0.059789093 |
| DNAJA3    | -0.089569114 | 10.6187537  | 0.05980371  |
| LOC645048 | 0.043527015  | 5.956507353 | 0.059825832 |
| LOC730262 | -0.032791335 | 6.071901221 | 0.059843018 |
| RNF128    | 0.029915301  | 6.337814891 | 0.059853352 |
| FLJ10916  | 0.266574604  | 8.977507095 | 0.059899761 |
| GNE       | -0.134315821 | 8.378800901 | 0.059931517 |
| RBMY1E    | -0.035644531 | 6.028573865 | 0.059961315 |
| KIAA1539  | -0.103888733 | 7.83197704  | 0.059974881 |
| C16ORF84  | -0.049065965 | 6.336349093 | 0.060031061 |
| PPFIA1    | -0.045172276 | 7.870537173 | 0.060031953 |
| LOC652637 | 0.051445347  | 6.213685453 | 0.060079166 |
| EYA2      | -0.025890412 | 6.128959434 | 0.060090655 |
| LOC142937 | 0.048783223  | 5.979964517 | 0.060130981 |
| CELSR2    | 0.076638175  | 6.555337335 | 0.06019295  |
| LOC642602 | 0.040262835  | 6.145445932 | 0.060271419 |
| SLITRK6   | 0.047773054  | 6.136290455 | 0.060277827 |
| SKIV2L    | -0.109334741 | 7.473594807 | 0.060328235 |
| CEP27     | -0.139678818 | 8.663152135 | 0.060386246 |
| WDR51B    | 0.091991005  | 7.062233102 | 0.06041358  |
| C10ORF116 | -0.147892191 | 10.83000459 | 0.060425118 |
| P76       | 0.099680913  | 7.587409661 | 0.06050102  |
| AMBN      | 0.023970581  | 6.0357746   | 0.060508339 |
| KRI1      | 0.055246001  | 6.636981668 | 0.06056544  |
| LOC283932 | 0.075390789  | 6.8652606   | 0.060569934 |
| LOC646009 | 0.049152348  | 6.00533223  | 0.06057059  |
| CCR3      | -0.034705293 | 5.960696482 | 0.060610163 |
| PRR19     | 0.047718306  | 6.179644694 | 0.060670971 |
| SERPINB2  | -0.037886848 | 6.016731691 | 0.060797876 |
| LOC644026 | 0.060002676  | 6.016255371 | 0.060852063 |
| C11ORF57  | 0.06778657   | 6.796182735 | 0.060857651 |
| LOC387820 | -0.095260273 | 9.314302169 | 0.060931976 |
| GALNT1    | -0.059310086 | 6.740823558 | 0.060945772 |
| CD300LF   | -0.054622342 | 6.106688448 | 0.060977846 |
| GPR108    | -0.07426512  | 7.049348967 | 0.060995367 |
| ARL16     | -0.155389028 | 9.227827756 | 0.061011381 |
| H1FX      | 0.120482225  | 8.488946094 | 0.061022026 |
| OR51V1    | -0.039632077 | 5.879738534 | 0.061129978 |
| KIAA2018  | 0.053136173  | 5.994923224 | 0.061145828 |
| ANKS1B    | 0.036903283  | 6.207838221 | 0.061249924 |
| FTSJ2     | 0.081856787  | 6.532576389 | 0.061285309 |
| ALPP      | -0.14208972  | 11.21252573 | 0.061290414 |
| MPPED1    | 0.037298551  | 6.056587685 | 0.061318172 |
| PRKAR2A   | -0.091274766 | 7.152580304 | 0.061344362 |
| RAD50     | 0.056656821  | 6.728063134 | 0.061348704 |
| CROT      | 0.068212896  | 7.02111867  | 0.061350976 |
| RBL1      | 0.036316113  | 6.215986583 | 0.061374416 |
| RFC2      | -0.037693513 | 6.545797574 | 0.061378391 |
| LOC642809 | -0.064857616 | 6.124443508 | 0.061449778 |
| PRKD2     | -0.059083553 | 6.501457647 | 0.061484339 |



## DEG.infomation

|           |              |             |             |
|-----------|--------------|-------------|-------------|
| LOC401068 | -0.042518384 | 6.096174723 | 0.061513644 |
| TMEM30A   | -0.095738871 | 7.698574168 | 0.061540198 |
| OR4F5     | 0.032702713  | 6.040392029 | 0.061548736 |
| LOC644413 | 0.048855837  | 5.963291894 | 0.061556292 |
| MRPS30    | 0.102099865  | 9.801723732 | 0.061596796 |
| RPL21     | -0.182755577 | 10.98676737 | 0.061616407 |
| MET       | -0.094509419 | 6.623750436 | 0.061647184 |
| ERC1      | 0.063433597  | 6.410285738 | 0.061648453 |
| RC3H2     | 0.078542054  | 7.251816914 | 0.061674261 |
| HYAL4     | 0.049074104  | 6.14801966  | 0.061741711 |
| RPL31     | 0.155525246  | 11.32764853 | 0.061763894 |
| PQLC3     | 0.089450651  | 8.208070214 | 0.061847684 |
| TYW1      | 0.074914826  | 7.357541955 | 0.061872623 |
| RSHL3     | -0.042866758 | 6.156998355 | 0.061910157 |
| SMEK3P    | -0.043679509 | 5.975443394 | 0.061932353 |
| PEX10     | 0.043540479  | 6.197618771 | 0.061957944 |
| HRG       | 0.033281343  | 6.001864923 | 0.061966562 |
| SUZ12P    | 0.024571422  | 6.103230107 | 0.061988912 |
| LOC649260 | -0.070755239 | 6.590616909 | 0.062031293 |
| DPT       | 0.215779973  | 8.008550952 | 0.062039348 |
| FAM177A1  | -0.091770944 | 11.63369591 | 0.062071975 |
| DMRTA1    | 0.060138229  | 6.166828006 | 0.062078419 |
| LOC642104 | 0.047497056  | 5.941399568 | 0.062082153 |
| NECAB2    | 0.05357238   | 6.260958211 | 0.062110223 |
| LOC732172 | 0.057763509  | 6.591600965 | 0.06213022  |
| FAM169B   | 0.043722674  | 5.967556085 | 0.062132929 |
| LUZP5     | 0.046216275  | 6.007539958 | 0.062171838 |
| LOC391092 | 0.04930087   | 6.037074133 | 0.062234114 |
| LOC652616 | -0.0467178   | 6.126747796 | 0.06224176  |
| HACE1     | 0.068672461  | 6.504251998 | 0.062265558 |
| LOC652344 | 0.043932243  | 6.023473443 | 0.062271823 |
| LOC647200 | 0.047340156  | 6.080786261 | 0.062317345 |
| IER5L     | 0.072698251  | 6.706750257 | 0.062326978 |
| LOC132706 | 0.049210664  | 6.074912576 | 0.062332267 |
| LOC651017 | -0.048857536 | 5.948710764 | 0.06245791  |
| MRAP      | -0.048205154 | 6.061752849 | 0.062475647 |
| LOC645336 | -0.044848329 | 6.054313767 | 0.062503889 |
| FLJ11151  | -0.058972406 | 6.351867936 | 0.062580924 |
| FKBP1B    | -0.046920006 | 6.11329868  | 0.062591525 |
| LOC651686 | -0.044606687 | 6.112773944 | 0.06261103  |
| CCDC84    | 0.085648993  | 8.101213515 | 0.062649412 |
| POLR2K    | 0.070452752  | 6.821675668 | 0.062692011 |
| LOC388564 | 0.06160572   | 6.292209416 | 0.062706716 |
| LOC641992 | -0.102709251 | 6.901702981 | 0.062753157 |
| ZNF3      | 0.039215895  | 6.414984701 | 0.062817237 |
| GRIK4     | 0.047347573  | 6.007889951 | 0.062818742 |
| H19       | -0.215165273 | 11.18964567 | 0.062849134 |
| SLIT3     | -0.104863202 | 6.602592365 | 0.062866846 |
| BOAT      | -0.04829066  | 6.390545259 | 0.062879804 |
| RTP1      | 0.050992903  | 6.225739268 | 0.062892159 |
| STRN3     | 0.128478477  | 9.283514846 | 0.062926412 |

## DEG.infomation

|            |              |             |             |
|------------|--------------|-------------|-------------|
| SS18L1     | 0.086273454  | 6.791616227 | 0.062928844 |
| WFDC11     | 0.053679549  | 5.985006201 | 0.063065512 |
| PLXNA4B    | 0.055660699  | 5.943135053 | 0.0630743   |
| PPP1R16A   | -0.124619078 | 9.735668595 | 0.063083443 |
| KANK2      | 0.152070127  | 9.34730312  | 0.063087912 |
| MRGPRX1    | 0.040461921  | 5.914687404 | 0.063141524 |
| TREM1      | -0.072390684 | 6.20704574  | 0.063181059 |
| FLJ45256   | -0.041574092 | 6.236795656 | 0.063196845 |
| IZUMO1     | -0.04177393  | 6.026476855 | 0.063204183 |
| LOC643550  | -0.059747663 | 6.200631275 | 0.063212113 |
| LOC653238  | 0.021951609  | 6.006606428 | 0.063237173 |
| FTHL8      | -0.190121478 | 10.6148154  | 0.063261418 |
| UBXN11     | -0.029532452 | 6.387005487 | 0.063284145 |
| FLJ10324   | 0.057066463  | 6.558443789 | 0.063383283 |
| SULT1C3    | 0.046322523  | 6.18866015  | 0.063428521 |
| TNKS       | 0.044943621  | 6.191721053 | 0.063442303 |
| LOC642212  | 0.050031814  | 5.944972426 | 0.063451816 |
| DEFB131    | 0.050963116  | 6.476733303 | 0.063477691 |
| CPLX1      | -0.144907204 | 6.913343101 | 0.063507842 |
| LOC731432  | -0.075577157 | 6.34631014  | 0.063508291 |
| C1ORF132   | -0.066471007 | 6.012268841 | 0.063547328 |
| ANXA4      | 0.074177363  | 6.372070107 | 0.063592161 |
| LOC645968  | 0.152449659  | 7.77313821  | 0.063672866 |
| ATP2B1     | 0.055737164  | 6.380073227 | 0.06373524  |
| ALDH1A1    | 0.135380539  | 7.78252655  | 0.063761028 |
| DUXAP3     | -0.145192417 | 9.956020917 | 0.063806429 |
| LOC645197  | 0.037134603  | 6.155842028 | 0.06381343  |
| KIAA1622   | -0.050977564 | 5.978507256 | 0.063827416 |
| KITLG      | 0.090400344  | 6.740273379 | 0.063866135 |
| CCDC144A   | 0.031624232  | 5.988348569 | 0.063871755 |
| VPS18      | 0.074446     | 7.435773926 | 0.063907049 |
| GLRA1      | -0.051481129 | 6.01347095  | 0.063924056 |
| BAT4       | 0.060533526  | 6.586954902 | 0.063928379 |
| FAM149A    | 0.103711308  | 7.06831633  | 0.063945332 |
| LOC645436  | -0.114765525 | 10.70791353 | 0.063957854 |
| LOC642424  | -0.050784683 | 6.001835559 | 0.063959703 |
| SNORD116-2 | -0.048156692 | 6.049536244 | 0.063980481 |
| VLDLR      | 0.099421786  | 8.925323304 | 0.064070338 |
| HES1       | -0.11374886  | 6.881277292 | 0.064093747 |
| CAPZA1     | -0.099427526 | 6.557181137 | 0.064232913 |
| USP6NL     | 0.045100119  | 6.793005627 | 0.064235324 |
| LOC344382  | 0.049544789  | 6.230107447 | 0.064239196 |
| COQ10B     | -0.078355972 | 10.42710806 | 0.064279633 |
| C15ORF33   | 0.039946225  | 5.990113582 | 0.06431496  |
| SLC10A3    | -0.077863564 | 8.720791414 | 0.064342956 |
| LOC652783  | -0.054140474 | 5.952438922 | 0.064380367 |
| LCT        | -0.037434684 | 5.951906275 | 0.064472287 |
| MAGEB4     | 0.041500226  | 5.896460195 | 0.064513848 |
| LOC653564  | 0.049047285  | 5.928155588 | 0.064519147 |
| PRIM1      | 0.040829872  | 6.55986566  | 0.064523432 |
| LOC645367  | -0.034828206 | 6.038425284 | 0.064540995 |

## DEG.infomation

|           |              |             |             |
|-----------|--------------|-------------|-------------|
| AHR       | -0.111920854 | 10.48585961 | 0.06455131  |
| LOC653034 | -0.050403476 | 6.438556962 | 0.064557262 |
| LOC649987 | 0.043753975  | 5.999029494 | 0.064594423 |
| LOC644577 | -0.051331231 | 6.00190909  | 0.064633331 |
| LOC644343 | 0.111714485  | 6.664469953 | 0.064702864 |
| PRDM5     | 0.047058691  | 6.080132803 | 0.064725876 |
| VCX       | 0.062965762  | 6.095771437 | 0.064800988 |
| LOC388494 | -0.045055514 | 6.020996359 | 0.064836242 |
| MTM1      | 0.06190862   | 7.134206147 | 0.064876363 |
| S1PR2     | 0.048263649  | 6.068871536 | 0.064889385 |
| LOC641806 | 0.046850841  | 6.37405479  | 0.064909034 |
| HEY1      | -0.113758624 | 8.582333414 | 0.064921131 |
| GIN52     | 0.081042022  | 6.560405806 | 0.064933421 |
| TSSK1B    | 0.047502567  | 6.248427728 | 0.065113428 |
| GIYD2     | -0.043076899 | 6.060906148 | 0.065117483 |
| LAMA3     | 0.031826418  | 6.351681806 | 0.065119006 |
| HOXC4     | -0.032754587 | 6.072843051 | 0.065123331 |
| LOC650137 | -0.037114818 | 6.01292592  | 0.065125689 |
| WDR25     | 0.096823696  | 6.776461177 | 0.065130571 |
| GCDH      | 0.078879847  | 7.883852201 | 0.065130602 |
| FOX11     | 0.03532462   | 6.205523659 | 0.065140349 |
| SYNPO     | 0.065911179  | 6.059428888 | 0.065157934 |
| EPHA7     | 0.043812787  | 5.97310633  | 0.065277388 |
| SPPL3     | 0.07047931   | 6.606903666 | 0.065306288 |
| ATP6V0E1  | 0.062447574  | 11.40339875 | 0.065387297 |
| LOC255809 | -0.044602754 | 6.154674323 | 0.065396798 |
| LONRF3    | -0.035811297 | 6.053797703 | 0.065457067 |
| ARF5      | -0.083752304 | 9.017337175 | 0.065463997 |
| C10ORF115 | -0.049646022 | 5.818732783 | 0.065472163 |
| LOC649632 | -0.041316499 | 6.018181499 | 0.06557049  |
| KCNMB4    | 0.097313186  | 7.038831853 | 0.065615261 |
| GNLY      | 0.062110834  | 6.293878699 | 0.065686555 |
| LOC645582 | 0.04828074   | 6.072363979 | 0.065827737 |
| OR2J3     | 0.040925089  | 6.014427758 | 0.06583066  |
| LOC646783 | 0.041287099  | 6.31531231  | 0.065869521 |
| AFG3L2    | 0.196945981  | 10.41290052 | 0.065871787 |
| LOC652373 | 0.046179088  | 6.091115972 | 0.066016585 |
| RIT1      | 0.078595245  | 6.882265472 | 0.066184746 |
| CRB3      | -0.028704144 | 6.180937163 | 0.066227018 |
| ZC3H18    | -0.061264675 | 6.72211644  | 0.066239601 |
| LOC441655 | 0.047445881  | 6.303473685 | 0.066278827 |
| TBC1D8B   | -0.025328323 | 6.063965448 | 0.066297972 |
| NKX6-3    | 0.067030762  | 6.370273507 | 0.066319381 |
| MATN1     | -0.054404871 | 6.017242424 | 0.066329219 |
| SAMD1     | -0.066233509 | 6.719001844 | 0.066333067 |
| LOC441511 | 0.085615582  | 6.850213675 | 0.066358939 |
| DHRS4     | 0.087331502  | 9.426509814 | 0.066373957 |
| PIAS1     | 0.07572213   | 8.141103363 | 0.066384514 |
| ATP11B    | 0.093723209  | 7.528735589 | 0.066464199 |
| FLJ46380  | 0.096443535  | 6.65213147  | 0.066485964 |
| HRH4      | 0.042786091  | 6.122298143 | 0.066493388 |

## DEG.infomation

|              |              |             |             |
|--------------|--------------|-------------|-------------|
| RRAD         | -0.24270882  | 9.31512256  | 0.066522114 |
| LOC643002    | 0.043618784  | 5.997779527 | 0.066545234 |
| DKFZP761E198 | -0.057259341 | 6.253064789 | 0.06663428  |
| SLC25A26     | -0.10420683  | 7.336572936 | 0.066650449 |
| MAPKAPK3     | -0.104829417 | 12.22908684 | 0.066706187 |
| COPS2        | 0.103708611  | 6.865242182 | 0.066736982 |
| LASS5        | -0.078850366 | 7.210492419 | 0.066782369 |
| LOC643043    | 0.032512156  | 6.125235858 | 0.066784607 |
| DSCR6        | 0.057917503  | 6.070482837 | 0.066821503 |
| CD1B         | -0.049093877 | 5.984709713 | 0.066839154 |
| OR9G4        | 0.041661538  | 5.95019094  | 0.066852165 |
| MOBP         | 0.025427672  | 6.014091006 | 0.066882897 |
| LOC647384    | -0.033909866 | 6.049242752 | 0.066955957 |
| LOC650363    | -0.043479215 | 6.13209671  | 0.066969027 |
| LOC645669    | 0.042748657  | 6.07820426  | 0.067055636 |
| LOC646746    | -0.033060584 | 6.37824608  | 0.067058836 |
| FLJ26850     | 0.058149436  | 6.312419646 | 0.067129491 |
| TRIM50       | 0.034736331  | 6.081845734 | 0.067151094 |
| SPRR4        | 0.047882206  | 6.152520683 | 0.067152049 |
| ILK          | 0.061228108  | 10.29037868 | 0.067184817 |
| PPID         | 0.071822473  | 6.627973807 | 0.067196515 |
| GALNS        | -0.068796657 | 6.482010903 | 0.06722249  |
| CCDC65       | 0.053462898  | 5.861817626 | 0.067263114 |
| ZC3H10       | 0.097206609  | 6.82913949  | 0.067340915 |
| PELI2        | 0.071346025  | 6.765445137 | 0.06739248  |
| FLJ45224     | 0.089902539  | 6.563370963 | 0.06740219  |
| WDR20        | -0.052708417 | 7.249453323 | 0.067432299 |
| LOC554223    | -0.030055587 | 6.098535173 | 0.067514418 |
| FLJ42291     | -0.049483742 | 6.027706948 | 0.067576936 |
| LOC284064    | 0.043000588  | 5.985549901 | 0.06760307  |
| ZXDC         | -0.043978804 | 6.784489124 | 0.06763911  |
| LOC402508    | 0.047026186  | 6.057387887 | 0.067666843 |
| C21ORF67     | 0.076919761  | 6.362120554 | 0.067736547 |
| NKAP         | 0.061197535  | 6.611798889 | 0.067739281 |
| WHDC1L1      | 0.024079631  | 6.070522872 | 0.067755655 |
| SNX5         | 0.052668724  | 7.395014271 | 0.067788618 |
| C4ORF44      | 0.033784997  | 6.143858344 | 0.067842458 |
| CPZ          | 0.030384794  | 6.072335755 | 0.067850817 |
| LOC387941    | 0.046434254  | 6.113282234 | 0.067879807 |
| LOC645711    | 0.040644382  | 6.144062456 | 0.067916998 |
| DGCR5        | -0.04699442  | 6.030283326 | 0.06792259  |
| CNOT6L       | 0.039391114  | 6.277630685 | 0.068016054 |
| CA12         | -0.037547862 | 6.145026925 | 0.068043672 |
| LOC338797    | -0.047564026 | 5.934194859 | 0.068133199 |
| CAMSAP1      | 0.071847224  | 8.400484991 | 0.06813474  |
| LOC148766    | -0.043409852 | 6.069658146 | 0.06814252  |
| FABP7        | 0.062306571  | 6.242849975 | 0.068144095 |
| LOC646309    | -0.048540318 | 6.119459361 | 0.068158224 |
| SLC34A2      | 0.033384821  | 6.064950649 | 0.068158931 |
| PDDC1        | 0.076173115  | 6.790171152 | 0.068162892 |
| GRIA2        | 0.046128624  | 5.995188271 | 0.068184161 |

## DEG.infomation

|           |              |             |             |
|-----------|--------------|-------------|-------------|
| CEP250    | 0.039008865  | 6.331588281 | 0.068235573 |
| RNF175    | -0.07622338  | 6.318497928 | 0.068252079 |
| TMC7      | 0.053532232  | 6.375002004 | 0.068273755 |
| INO80C    | 0.062577917  | 8.49972234  | 0.06830303  |
| GOSR2     | -0.076459357 | 7.180655493 | 0.068315167 |
| INTS4     | 0.043923975  | 7.005247243 | 0.068324226 |
| NRIP2     | -0.058228684 | 6.567123878 | 0.068367222 |
| CXORF1    | 0.044388869  | 6.156732527 | 0.068391444 |
| TLE6      | 0.082556958  | 6.892917341 | 0.068393138 |
| ANKRD55   | -0.050777184 | 5.970830553 | 0.06843435  |
| HMG2L1    | 0.043639866  | 6.395130376 | 0.068482313 |
| TBC1D3G   | -0.067653086 | 6.417000904 | 0.068495798 |
| DSCR3     | -0.109253227 | 8.765602422 | 0.068521424 |
| DMC1      | -0.14647525  | 10.28902639 | 0.068525142 |
| C18ORF2   | 0.039191668  | 6.043119365 | 0.068615328 |
| RNF26     | 0.073962914  | 6.990310391 | 0.068648949 |
| LOC284821 | -0.133260519 | 12.72955941 | 0.068701084 |
| ZDHC21    | 0.05327587   | 6.315596776 | 0.068813246 |
| PRAMEF16  | 0.049783511  | 6.03329817  | 0.068819396 |
| PHLDB1    | -0.093550496 | 10.17454597 | 0.068821135 |
| RCL1      | -0.071263953 | 6.973831734 | 0.068849678 |
| CASC1     | 0.080971514  | 6.291629917 | 0.068959827 |
| C6ORF160  | 0.16669279   | 10.15533299 | 0.068983113 |
| CBLN2     | -0.083773534 | 6.164433398 | 0.068985028 |
| SMC5      | -0.051187534 | 5.938222741 | 0.068986784 |
| SDHALP1   | -0.076167731 | 8.019861714 | 0.069008835 |
| KIF21B    | 0.034379694  | 6.062131913 | 0.069035273 |
| IGSF2     | -0.043273937 | 6.2406311   | 0.069051458 |
| BXDC5     | 0.080774501  | 8.475127455 | 0.069106447 |
| WDR22     | 0.095960815  | 10.73263818 | 0.069144287 |
| LOC120376 | -0.051248672 | 6.011082838 | 0.069147248 |
| SPRN      | 0.046011705  | 6.39807544  | 0.069159219 |
| C15ORF56  | 0.049480161  | 6.021186066 | 0.069174769 |
| LOC402694 | -0.149438135 | 11.44839693 | 0.069183269 |
| FAM21A    | 0.061646211  | 6.337092941 | 0.069300868 |
| CDA       | -0.100995381 | 6.951683747 | 0.069304273 |
| PCDHGC4   | 0.034821122  | 6.063564661 | 0.069327011 |
| C20ORF135 | -0.04552094  | 5.986774608 | 0.069382152 |
| TMEM188   | -0.093605936 | 8.857792195 | 0.06938716  |
| RPS6KC1   | -0.047705026 | 7.014173413 | 0.069388897 |
| INTS1     | -0.068717913 | 8.222901222 | 0.069455352 |
| CAPN11    | -0.057868696 | 6.279025686 | 0.069537572 |
| GTPBP4    | -0.121510824 | 9.815410285 | 0.069545585 |
| LOC400968 | -0.044229849 | 5.893219188 | 0.069561542 |
| QRICH1    | -0.067095385 | 8.086397337 | 0.069563119 |
| FAM19A4   | 0.031162187  | 6.212239405 | 0.069601094 |
| RBM7      | 0.112892458  | 7.147750431 | 0.069603745 |
| ANXA9     | 0.051349082  | 5.971072134 | 0.06960855  |
| CSNK1G1   | -0.044259278 | 6.585768456 | 0.069628273 |
| MRPL12    | 0.099247182  | 10.21163262 | 0.069660476 |
| CLRN1     | 0.050893009  | 6.5303679   | 0.069704622 |

## DEG.infomation

|           |              |             |             |
|-----------|--------------|-------------|-------------|
| PTCD3     | 0.045804446  | 6.274485928 | 0.069706135 |
| HNRNPC    | -0.071749101 | 7.854234437 | 0.069830597 |
| SRF       | -0.094070585 | 10.92512999 | 0.069850623 |
| PITPNA    | -0.072470131 | 7.781092141 | 0.069852993 |
| B4GALT6   | -0.059846071 | 6.241288268 | 0.069857386 |
| INTS10    | -0.065288953 | 8.726977986 | 0.069891021 |
| BAALC     | -0.044101889 | 6.347630478 | 0.069896082 |
| LOC652392 | 0.046963916  | 6.071141016 | 0.069920857 |
| SHANK1    | 0.049085527  | 6.006935653 | 0.069943756 |
| LOC648638 | 0.091925485  | 8.094547396 | 0.069989109 |
| MTHFD1    | 0.067638293  | 7.069930845 | 0.070040269 |
| LOC641772 | 0.029096245  | 6.09337584  | 0.070078513 |
| KRTAP10-7 | -0.045752745 | 5.917677385 | 0.070094894 |
| CWC15     | 0.075597938  | 10.10120269 | 0.070117039 |
| RPA1      | 0.104655046  | 9.257688295 | 0.070120402 |
| CUGBP2    | 0.064775624  | 6.957399448 | 0.070202365 |
| RPPH1     | -0.057893466 | 6.358421146 | 0.070233839 |
| LOC255374 | -0.045013577 | 6.191799729 | 0.070237379 |
| DBR1      | 0.063041221  | 6.55832443  | 0.070266008 |
| LOC649404 | 0.059480903  | 5.911979707 | 0.070267562 |
| LOC552891 | 0.052070527  | 6.392683676 | 0.070286635 |
| COG2      | 0.061203792  | 8.771693968 | 0.070314714 |
| ZNF324B   | 0.054529609  | 6.21544013  | 0.07031988  |
| AAAS      | 0.058762705  | 6.880830554 | 0.070349338 |
| ITGA1     | -0.088814766 | 6.858228144 | 0.070403093 |
| C7ORF11   | 0.061068082  | 7.173871488 | 0.070425949 |
| NRAP      | -0.14663064  | 10.35760273 | 0.070467513 |
| PPIL5     | -0.033345694 | 6.555920074 | 0.070521045 |
| LOC647103 | 0.043668672  | 6.125590052 | 0.070566491 |
| PRSS8     | 0.072889145  | 6.031104177 | 0.070673581 |
| RNF44     | 0.084819621  | 7.128548619 | 0.070676672 |
| LOC200420 | 0.056876197  | 6.110817431 | 0.070678345 |
| CDH1      | -0.041374151 | 6.008330552 | 0.070681431 |
| LOC647919 | 0.046586135  | 6.138720971 | 0.07073418  |
| GRIK3     | -0.044329041 | 6.111001711 | 0.07075803  |
| LOC653127 | -0.049608521 | 6.142818503 | 0.070770543 |
| LRRC15    | -0.087618426 | 7.246749701 | 0.070818476 |
| VPS72     | 0.072156855  | 7.995900595 | 0.070852665 |
| SNX14     | 0.06004588   | 7.311662702 | 0.070919615 |
| CACNA1D   | 0.050795884  | 6.346177574 | 0.070928876 |
| LOC647121 | -0.043195246 | 6.077769447 | 0.071024045 |
| CLEC3B    | 0.160566009  | 9.210296417 | 0.071136556 |
| LOC652251 | 0.048840872  | 6.006310826 | 0.071142485 |
| DUX4C     | 0.045188301  | 6.143678786 | 0.071145096 |
| NUP107    | -0.077346803 | 8.302219458 | 0.071215856 |
| TESC      | -0.204089    | 9.973883859 | 0.071228169 |
| EXOC3L    | -0.049035419 | 6.188789857 | 0.07125016  |
| HYMAI     | 0.041924813  | 6.054475528 | 0.071266348 |
| LOC401915 | 0.049841731  | 6.007065389 | 0.071279251 |
| CXORF24   | 0.039402681  | 6.059916853 | 0.071294849 |
| LOC650008 | -0.048318409 | 6.189297514 | 0.071304391 |

## DEG.infomation

|           |              |             |             |
|-----------|--------------|-------------|-------------|
| SULT1A1   | -0.122339816 | 8.870670415 | 0.071305019 |
| SCNN1B    | 0.055234195  | 6.340539235 | 0.071377899 |
| VAPA      | 0.049082068  | 6.78673916  | 0.071428383 |
| FLJ40722  | -0.122047474 | 7.680588968 | 0.071431707 |
| LOC390378 | -0.053878943 | 6.003151828 | 0.071531908 |
| SIGLEC11  | -0.045860952 | 6.093246635 | 0.071536515 |
| TUFM      | 0.074956226  | 10.47877372 | 0.07166485  |
| POLR2J    | -0.090157973 | 6.92592877  | 0.071672363 |
| H2BFWT    | 0.054767272  | 5.962793314 | 0.071719896 |
| DNASE1L1  | 0.069067552  | 7.380547999 | 0.071735526 |
| NBPF3     | 0.037361962  | 6.540564157 | 0.071766934 |
| ZNF568    | 0.035125652  | 6.179979709 | 0.071801405 |
| FGF2      | 0.055034628  | 6.591363309 | 0.071837994 |
| HSPE1     | -0.111932073 | 10.95787495 | 0.07184062  |
| CSMD1     | 0.033001444  | 6.17241332  | 0.071870013 |
| CHES1     | 0.142421917  | 10.0016784  | 0.071889307 |
| RGNEF     | 0.027870493  | 6.175989331 | 0.071991749 |
| SNX33     | 0.067095692  | 6.996721738 | 0.072094884 |
| TBC1D22B  | -0.068288615 | 6.831320232 | 0.072103148 |
| LOC642154 | 0.041575928  | 6.281738207 | 0.072131315 |
| GAL3ST4   | -0.084025659 | 6.149208809 | 0.072221541 |
| ZNF414    | 0.049226575  | 6.473571384 | 0.072246351 |
| ATG9A     | -0.079279189 | 7.737455349 | 0.072257305 |
| WVOX      | -0.03279698  | 6.156341903 | 0.07227105  |
| FAM43A    | 0.193250293  | 9.388789007 | 0.072278183 |
| LOC730426 | 0.041560204  | 6.11948974  | 0.072294509 |
| LOC644655 | 0.042680959  | 5.922347059 | 0.072297977 |
| LOC91661  | 0.061173839  | 6.294870769 | 0.072377967 |
| HSH2D     | 0.048085575  | 6.015428453 | 0.07242629  |
| SEPT10    | 0.051995151  | 6.754270955 | 0.072449679 |
| C14ORF126 | 0.050821795  | 6.199213232 | 0.072459935 |
| LOC143666 | -0.046526621 | 6.526211034 | 0.072472761 |
| LOC645032 | 0.049485697  | 6.119152493 | 0.072473739 |
| NFIX      | 0.132965491  | 10.39229183 | 0.072483444 |
| FTHL3P    | -0.152463322 | 9.599009089 | 0.072510647 |
| WNT5A     | -0.053274408 | 6.186629473 | 0.072513727 |
| OR6N2     | 0.050931122  | 6.027912433 | 0.072522203 |
| ATXN1     | 0.095244448  | 7.759766409 | 0.072549857 |
| SFT2D3    | 0.055645314  | 6.677207835 | 0.072564114 |
| LOC648851 | 0.051605583  | 5.912127333 | 0.072635683 |
| FAM7A1    | 0.061009213  | 6.192912842 | 0.072637782 |
| LOC642387 | -0.039829287 | 5.943270514 | 0.072688721 |
| C3ORF62   | 0.046363419  | 6.583888012 | 0.072732353 |
| SPON1     | -0.193155356 | 8.261118689 | 0.072734465 |
| PLAC8L1   | -0.046542672 | 6.148831804 | 0.072748499 |
| CAMK2N1   | -0.140094268 | 8.929084365 | 0.072776203 |
| GBA3      | 0.032235957  | 5.959476115 | 0.072836    |
| SNORD25   | 0.049154716  | 6.2595155   | 0.072851317 |
| SNORA25   | -0.106577077 | 6.703116284 | 0.072854368 |
| RPL35     | -0.119978303 | 12.8507892  | 0.072862342 |
| DYNLL2    | 0.098173356  | 9.256123374 | 0.072875572 |

## DEG.infomation

|           |              |             |             |
|-----------|--------------|-------------|-------------|
| PLA2R1    | 0.036266032  | 6.205705243 | 0.072899591 |
| APH1A     | -0.081482526 | 8.235991586 | 0.072904477 |
| PLSCR2    | -0.042568062 | 6.080640796 | 0.072928874 |
| ADAMTSL4  | -0.069641898 | 6.741477879 | 0.072930218 |
| UBE2N     | 0.108350685  | 10.01257649 | 0.072969621 |
| HCG27     | 0.053992534  | 6.346266345 | 0.072995679 |
| STAT5B    | 0.075295251  | 7.757881522 | 0.073012424 |
| LOC390367 | 0.042563526  | 6.164171095 | 0.073164428 |
| NHEJ1     | 0.044973811  | 6.147424941 | 0.073238254 |
| DSE       | -0.079810304 | 7.247421683 | 0.073254185 |
| FAM5B     | 0.046049396  | 6.238937157 | 0.07329687  |
| LOC647166 | 0.048694896  | 5.974495571 | 0.073308629 |
| LOC646507 | 0.047597879  | 5.982597269 | 0.073326178 |
| CLCN3     | -0.066384985 | 8.017389159 | 0.073373331 |
| CNTN2     | -0.046646286 | 6.024202931 | 0.073375249 |
| PADI3     | 0.044020345  | 6.029068442 | 0.073398217 |
| LOC642855 | 0.058249849  | 6.222393632 | 0.073401419 |
| WDR89     | 0.033893319  | 6.180986951 | 0.073532542 |
| MTIF3     | 0.141321684  | 10.3801065  | 0.073534412 |
| ZFP28     | 0.043502081  | 6.207663719 | 0.073543775 |
| GPB5      | 0.046498597  | 6.308037032 | 0.073727781 |
| GALNT3    | -0.104044333 | 7.648125406 | 0.073730673 |
| C10ORF12  | 0.05194137   | 6.259621567 | 0.073750538 |
| LOC653766 | 0.053145919  | 6.117044318 | 0.073788175 |
| PIWIL2    | -0.028114698 | 6.004585749 | 0.073838408 |
| UBR4      | -0.088221354 | 9.391531199 | 0.07392076  |
| FLJ10357  | 0.056268055  | 6.491412389 | 0.074008938 |
| FASTKD5   | -0.078921227 | 9.250559749 | 0.074012112 |
| GTF2IRD2B | -0.090856224 | 8.461604891 | 0.074027046 |
| LOC390466 | 0.100825871  | 8.228686307 | 0.074067388 |
| FLJ43980  | -0.051455848 | 5.915643795 | 0.074123671 |
| LEREPO4   | -0.044578721 | 5.988773788 | 0.074148689 |
| LOC652126 | -0.047916777 | 6.028869664 | 0.074206098 |
| DUOXA2    | -0.042373991 | 6.091116552 | 0.074221616 |
| C8ORF22   | -0.046395147 | 5.98331201  | 0.074230062 |
| PDE8A     | 0.057242426  | 7.31970424  | 0.074274868 |
| TRPM4     | 0.139249907  | 8.164850645 | 0.074276404 |
| COQ2      | 0.107262854  | 9.654509377 | 0.074350627 |
| TDRD7     | 0.078486374  | 8.345931656 | 0.074375569 |
| C13ORF18  | -0.032398462 | 6.086325473 | 0.074432293 |
| LDHC      | 0.082942865  | 6.256312397 | 0.074462539 |
| CDH17     | 0.081123015  | 6.097396677 | 0.074471322 |
| TUSC5     | -0.047046171 | 6.068337581 | 0.074474571 |
| ACSL6     | 0.023118051  | 6.049022933 | 0.074513413 |
| LIN37     | 0.051396577  | 6.704268332 | 0.074585336 |
| USP53     | 0.112958629  | 7.174223008 | 0.074614645 |
| RPS15A    | -0.086984608 | 12.32330219 | 0.074616927 |
| C6ORF103  | -0.041711378 | 6.068517534 | 0.074624988 |
| GRIA1     | 0.046331813  | 6.104133469 | 0.074630318 |
| TELO2     | -0.06607571  | 7.059990208 | 0.074704267 |
| SLC17A4   | -0.047701011 | 5.951694558 | 0.074765761 |



## DEG.infomation

|           |              |             |             |
|-----------|--------------|-------------|-------------|
| SLC7A10   | -0.050062781 | 6.149069052 | 0.074794058 |
| KRTAP13-3 | 0.046129998  | 6.056394839 | 0.074833482 |
| QSER1     | 0.048026922  | 6.244739752 | 0.074844218 |
| SLC17A2   | -0.05598716  | 6.064305356 | 0.074893986 |
| BHLHB5    | 0.073525274  | 6.37584207  | 0.074895635 |
| RFXDC1    | -0.050031662 | 6.180077315 | 0.074927668 |
| LOC651556 | -0.045143728 | 6.210412763 | 0.074982265 |
| VSIG1     | -0.063633849 | 6.025711846 | 0.074991646 |
| EPN3      | 0.142817675  | 6.916274301 | 0.075001577 |
| ARHGEF10  | 0.085685717  | 9.377126732 | 0.075078413 |
| CAPN12    | -0.036174804 | 6.191068657 | 0.075195004 |
| FBXO27    | 0.050678004  | 6.077750125 | 0.075282258 |
| PLCL2     | -0.122423556 | 9.577295432 | 0.075311722 |
| HMG1L1    | 0.147936178  | 8.098515372 | 0.075419583 |
| LOC644227 | -0.04690563  | 5.943485575 | 0.075462484 |
| LOC642669 | 0.047094877  | 6.124763464 | 0.075498259 |
| DEPDC4    | -0.033557887 | 6.086078788 | 0.075569295 |
| GNG5      | 0.096797572  | 9.422918317 | 0.075579227 |
| C10ORF132 | -0.04593852  | 6.045071057 | 0.075616178 |
| CBLN1     | -0.149677331 | 6.718338876 | 0.075648099 |
| LOC400506 | 0.065546288  | 6.587465382 | 0.075648639 |
| LOC642282 | -0.07746148  | 6.394831786 | 0.075719726 |
| PNKP      | -0.082357528 | 8.732126719 | 0.075735162 |
| CSTF2T    | 0.075390007  | 7.470063029 | 0.07575126  |
| RNF121    | -0.055457397 | 7.988175809 | 0.075765849 |
| LOC649957 | 0.055243812  | 6.233156499 | 0.075770266 |
| HSP90AA1  | -0.105495755 | 11.97481235 | 0.075800793 |
| CST9      | 0.081465613  | 7.78026559  | 0.075819608 |
| LOC652517 | -0.045148574 | 5.949947893 | 0.075852193 |
| LOC648415 | 0.045428319  | 6.11939818  | 0.075873336 |
| TMEM148   | -0.0424548   | 6.026672421 | 0.075874644 |
| NRSN1     | -0.045017369 | 6.015987224 | 0.075914503 |
| TNXA      | -0.056261094 | 6.340117278 | 0.076007442 |
| LOC645312 | -0.042949718 | 6.130917578 | 0.076043769 |
| LOC648997 | 0.078373546  | 6.067786264 | 0.076117941 |
| USMG5     | 0.33878269   | 8.530083281 | 0.076139967 |
| SLC35B4   | -0.065966447 | 6.373412332 | 0.076145052 |
| LOC647104 | -0.077971089 | 6.693175172 | 0.076213784 |
| LOC652534 | 0.038733701  | 6.104516922 | 0.076215185 |
| LOC652704 | 0.050088504  | 6.170733151 | 0.076247095 |
| PIGF      | 0.067563761  | 7.193236201 | 0.076251117 |
| RAB3IP    | 0.073838878  | 8.504843386 | 0.076277925 |
| LOC729021 | -0.076198673 | 6.847680981 | 0.0763072   |
| SUPV3L1   | 0.066319766  | 8.099905781 | 0.07633773  |
| RBM44     | 0.046369131  | 6.358572909 | 0.076350548 |
| CORT      | 0.057446028  | 6.089233773 | 0.076374654 |
| LOC391811 | -0.0924361   | 11.58179328 | 0.076375127 |
| C14ORF143 | 0.046711592  | 6.394866756 | 0.076402561 |
| LOC389748 | -0.042722167 | 5.989870259 | 0.076427088 |
| RAD52     | 0.033827673  | 6.131526172 | 0.076453977 |
| SYT7      | -0.063650015 | 6.465862096 | 0.076474542 |

## DEG.infomation

|           |              |             |             |
|-----------|--------------|-------------|-------------|
| GTSF1     | -0.104945443 | 6.132899226 | 0.076509822 |
| LTB       | -0.057719186 | 6.29337319  | 0.076556331 |
| HOXA2     | -0.034212152 | 6.086957149 | 0.076582726 |
| IL3       | -0.047445046 | 5.975173716 | 0.076603309 |
| STT3B     | 0.093192896  | 7.621866843 | 0.076732326 |
| ETV5      | -0.092334856 | 7.215032257 | 0.076733532 |
| LOC647592 | 0.047183938  | 6.132977803 | 0.076737326 |
| C6ORF106  | -0.072889613 | 7.474897835 | 0.076793114 |
| OR2D2     | 0.044634125  | 6.021399243 | 0.076834836 |
| TEKT4     | 0.056793891  | 5.934322398 | 0.076869918 |
| LDOC1     | -0.066220968 | 6.864031887 | 0.076898149 |
| CDC42EP3  | 0.1242656    | 7.454912404 | 0.076912743 |
| PGM1      | 0.099702137  | 12.6566895  | 0.076915246 |
| VN1R1     | 0.059459598  | 6.354457233 | 0.07702743  |
| MARS2     | -0.049087384 | 6.618811352 | 0.077090528 |
| RPL24     | -0.095867672 | 13.19525612 | 0.077092368 |
| ZNF682    | -0.140178327 | 9.50266774  | 0.077134651 |
| TRMT6     | -0.078428562 | 6.306848536 | 0.077141951 |
| TNFSF9    | 0.054253507  | 6.396234857 | 0.077147254 |
| RDH13     | 0.105232892  | 8.29983812  | 0.077163006 |
| LOC646266 | 0.043881042  | 5.990360296 | 0.07717544  |
| RFP       | -0.056300576 | 6.867245484 | 0.077184233 |
| LOC653778 | -0.086164356 | 8.055705525 | 0.077184795 |
| DNAJB14   | 0.045618214  | 6.732606592 | 0.077205093 |
| LOC285382 | 0.075817999  | 7.132791755 | 0.077207151 |
| LOC441582 | -0.045973812 | 6.043432809 | 0.077210234 |
| TEKT3     | 0.055783993  | 6.090374229 | 0.077283133 |
| MFSD11    | 0.100209782  | 8.836177205 | 0.077286596 |
| LOC642321 | 0.040983093  | 6.125362046 | 0.07734735  |
| UBA6      | -0.099282007 | 7.273575076 | 0.077395359 |
| ZSWIM2    | 0.040684147  | 5.997215006 | 0.077399362 |
| PI4K2A    | -0.072563213 | 6.817780486 | 0.077449484 |
| LOC643201 | -0.025478628 | 6.120237316 | 0.077466275 |
| LOC402251 | 0.165669869  | 11.28230963 | 0.077501647 |
| CABP7     | -0.041343807 | 6.261648861 | 0.077543736 |
| DEK       | -0.129462015 | 9.264039041 | 0.077561164 |
| APOC3     | -0.049347393 | 5.994697118 | 0.077590415 |
| ASMT      | 0.044691574  | 6.034288374 | 0.077722607 |
| LIF       | -0.05625989  | 6.105466041 | 0.077747534 |
| LOC644979 | -0.122473459 | 7.219787654 | 0.077859022 |
| OR13C8    | -0.047854114 | 5.95537166  | 0.077930225 |
| NXF5      | 0.042706429  | 6.075083636 | 0.077951915 |
| ADCYAP1   | -0.051414772 | 6.290064156 | 0.077994676 |
| LOC647778 | 0.049740653  | 6.303384329 | 0.078007886 |
| LOC652898 | 0.045164965  | 5.971013263 | 0.078052618 |
| ANP32B    | 0.063010443  | 11.43925474 | 0.078061251 |
| LOC643176 | -0.048745115 | 6.299136781 | 0.078099704 |
| DENND2C   | -0.08313242  | 6.705601843 | 0.078160127 |
| TTK       | -0.044699081 | 6.01228736  | 0.078215501 |
| GPR42     | 0.046112929  | 6.002161999 | 0.078242461 |
| NOTCH2    | -0.041293856 | 6.242030353 | 0.078249918 |

## DEG.infomation

|           |              |             |             |
|-----------|--------------|-------------|-------------|
| PON1      | 0.055895425  | 5.973405221 | 0.078275965 |
| C15ORF44  | 0.036274996  | 6.520330543 | 0.078301614 |
| RPH3A     | -0.045016345 | 6.222868947 | 0.078365419 |
| SLC22A17  | 0.060188818  | 7.108458384 | 0.078388725 |
| FAM24A    | 0.04557503   | 5.981442138 | 0.078427906 |
| TMEM16B   | 0.053150661  | 6.467864764 | 0.078432697 |
| OR6C76    | 0.04978474   | 5.930426025 | 0.078434205 |
| DCT       | 0.041970271  | 6.093280255 | 0.078471528 |
| SNORD83A  | -0.040715317 | 5.939000104 | 0.078544891 |
| ME3       | 0.070557601  | 7.387026789 | 0.078627128 |
| TSTA3     | -0.070414823 | 7.127936275 | 0.078781445 |
| ELF5      | -0.030321845 | 6.002398313 | 0.078782774 |
| FAM109A   | 0.093003176  | 7.174372346 | 0.078795563 |
| ZNF681    | -0.032851719 | 6.000517704 | 0.078798059 |
| OSTBETA   | -0.037878027 | 5.959927645 | 0.078932163 |
| LOC388755 | -0.043274247 | 6.153661331 | 0.079009139 |
| LOC651073 | 0.050546602  | 6.184981097 | 0.079038503 |
| FAM162A   | 0.21215303   | 10.05192876 | 0.0790408   |
| NPPB      | 0.677930546  | 12.34261697 | 0.079063704 |
| GPN1      | -0.090122004 | 8.962356851 | 0.079072534 |
| SNORD109B | 0.047445854  | 6.302181076 | 0.079083886 |
| RUSC2     | -0.107950128 | 7.142043203 | 0.079118269 |
| LTBP4     | 0.107449273  | 8.64949692  | 0.079165686 |
| USP11     | 0.078440955  | 7.702718509 | 0.079236978 |
| LOC730510 | -0.039986717 | 6.268384053 | 0.079341382 |
| LOC644412 | -0.048306955 | 5.98342383  | 0.079341975 |
| POLR3C    | -0.06528571  | 8.988624195 | 0.079360581 |
| PRM1      | -0.043178607 | 6.110099338 | 0.079472603 |
| LCE5A     | 0.042245029  | 6.211924539 | 0.079473711 |
| RSHL1     | 0.048914262  | 6.21808517  | 0.07951801  |
| C22ORF9   | -0.032194568 | 6.191244019 | 0.079533088 |
| TMEM98    | 0.106315214  | 8.041275619 | 0.079588973 |
| NKX2-8    | -0.069039813 | 6.034764988 | 0.079622919 |
| CACNA1I   | 0.032186972  | 6.096134897 | 0.079623239 |
| OR7E37P   | -0.047318966 | 6.136105687 | 0.079628202 |
| AAMP      | -0.091640627 | 7.34035444  | 0.079652941 |
| LOC440978 | 0.034703307  | 6.155840097 | 0.079675689 |
| CDKN2B    | 0.03958033   | 6.448659301 | 0.079697736 |
| PTPRC     | -0.024937703 | 6.055871534 | 0.079698267 |
| RALGPS2   | -0.025814935 | 6.035020563 | 0.079769737 |
| AP4S1     | 0.053664075  | 6.675359912 | 0.079915155 |
| DNAJC8    | 0.073712802  | 11.39564281 | 0.079939931 |
| LOC728653 | -0.072674914 | 6.728740838 | 0.079947567 |
| SLC4A5    | -0.101635717 | 7.702678578 | 0.079955667 |
| MEGF8     | -0.056913096 | 6.29409507  | 0.080002903 |
| PSMD13    | -0.065743869 | 6.733356814 | 0.080014217 |
| CHMP6     | -0.050664738 | 7.634345669 | 0.080030172 |
| FAM115A   | -0.138554492 | 10.97792764 | 0.080061461 |
| TMEM151A  | -0.028089926 | 6.064804506 | 0.080129823 |
| VEPH1     | -0.04593412  | 6.041762047 | 0.080203388 |
| ASB14     | 0.056500656  | 6.085687408 | 0.080217436 |

## DEG.infomation

|              |              |             |             |
|--------------|--------------|-------------|-------------|
| LOC651333    | -0.04461117  | 6.036052757 | 0.080239024 |
| C15ORF27     | -0.042790839 | 5.945625032 | 0.080270541 |
| ELL3         | 0.054974258  | 6.333447401 | 0.080321101 |
| BPY2         | 0.031515151  | 5.962667347 | 0.08032401  |
| ADAMTSL1     | -0.023582369 | 6.179164875 | 0.080363752 |
| UTP14A       | -0.062938959 | 7.706180265 | 0.080393638 |
| CCL4         | 0.039470498  | 5.999313069 | 0.080437949 |
| BRSK2        | -0.055645462 | 6.060262537 | 0.080449949 |
| LOC643669    | 0.032710975  | 6.215567151 | 0.080485508 |
| LOC653050    | -0.029507017 | 6.146890547 | 0.080494715 |
| C9ORF117     | 0.04105404   | 6.126055064 | 0.080530136 |
| FBLN7        | 0.061982764  | 6.213755136 | 0.080547805 |
| LOC96610     | -0.063140951 | 6.798743073 | 0.08055264  |
| SFT2D1       | -0.093584748 | 9.899658907 | 0.080582467 |
| LOC642573    | 0.041082763  | 6.215114092 | 0.080589042 |
| LOC646302    | 0.057846416  | 6.046862451 | 0.080595862 |
| CLCN6        | 0.057218949  | 7.734430163 | 0.08072276  |
| FNDC5        | -0.185681829 | 10.07975587 | 0.080760473 |
| RNF216       | -0.104773431 | 8.09893174  | 0.080766467 |
| HSPC047      | -0.046370501 | 6.411805876 | 0.080801341 |
| EEF2         | 0.074362519  | 13.12358535 | 0.080846951 |
| NOMO3        | -0.09002872  | 6.618831117 | 0.080854489 |
| SREBF2       | 0.072838887  | 6.676388786 | 0.080856843 |
| LOC442448    | 0.043206742  | 6.252861384 | 0.080924774 |
| GDE1         | 0.104438062  | 8.977507734 | 0.080927891 |
| PIGN         | 0.065762685  | 7.8986771   | 0.080971569 |
| SEP15        | -0.099681419 | 10.1438082  | 0.081079154 |
| LOC283392    | 0.047313767  | 6.09623444  | 0.081094404 |
| ZNF800       | -0.076946862 | 7.223983906 | 0.081258657 |
| DKFZP451A211 | 0.157262543  | 9.882796312 | 0.081266718 |
| MFAP3L       | 0.029686464  | 6.009795219 | 0.081267207 |
| APOA2        | -0.045670828 | 6.077414007 | 0.081299481 |
| GPM6B        | -0.102240449 | 7.019741986 | 0.081317933 |
| AGGF1        | 0.058993833  | 8.011715219 | 0.081387801 |
| IFNA21       | -0.045372443 | 6.260842142 | 0.081399646 |
| C7ORF43      | -0.063003898 | 6.549535312 | 0.081418902 |
| FAM58B       | -0.040717734 | 6.080077428 | 0.081488378 |
| PRKACB       | 0.025115596  | 6.116911596 | 0.081515855 |
| TCF23        | 0.043740506  | 6.167075345 | 0.081575121 |
| MYO18A       | 0.09715736   | 7.849545343 | 0.081674738 |
| LOC643311    | 0.05271833   | 5.915434254 | 0.081679477 |
| LOC642236    | 0.073215273  | 7.479621125 | 0.08169248  |
| FCF1         | 0.058932479  | 6.899213693 | 0.081704928 |
| LOC652278    | 0.048390715  | 6.170232367 | 0.081732021 |
| CUEDC2       | 0.07431917   | 9.822158187 | 0.081785016 |
| LOC644642    | -0.084503702 | 6.938682396 | 0.081818646 |
| PHF23        | -0.064736785 | 7.641953149 | 0.081893404 |
| LOC644764    | 0.041831153  | 6.216985396 | 0.081918876 |
| LOC647415    | 0.047808892  | 6.04721671  | 0.081942388 |
| ZNF813       | -0.047695191 | 6.160020619 | 0.081985528 |
| TMCO4        | 0.052055338  | 6.505568408 | 0.082028668 |

## DEG.infomation

|           |              |             |             |
|-----------|--------------|-------------|-------------|
| ZNF778    | 0.044182835  | 6.25308646  | 0.082068973 |
| LOC254559 | 0.04719631   | 6.036022923 | 0.082110187 |
| RAP1B     | -0.068030892 | 6.771643167 | 0.082175728 |
| LOC653807 | 0.046591384  | 6.005811133 | 0.082204226 |
| C21ORF57  | -0.093474489 | 7.705319142 | 0.082214754 |
| LOC653480 | 0.043933193  | 6.166057156 | 0.082231641 |
| LOC646533 | 0.040272252  | 6.05909418  | 0.082333775 |
| CYP20A1   | -0.04510518  | 7.14530039  | 0.082378651 |
| OR8D2     | 0.043511169  | 6.105252109 | 0.082400413 |
| LOC644264 | 0.047535957  | 6.061275332 | 0.082461429 |
| LOC645151 | 0.037222192  | 6.070844988 | 0.082464645 |
| TTYH2     | -0.065269427 | 6.794260194 | 0.082547987 |
| MBD2      | -0.029926205 | 6.15951934  | 0.082574799 |
| CCDC107   | -0.082585776 | 7.811961    | 0.082589985 |
| LOC646348 | 0.045422415  | 6.251527827 | 0.082595735 |
| LOH12CR1  | 0.057440641  | 6.556205817 | 0.082597913 |
| LOC388780 | -0.042042624 | 6.166988501 | 0.082781188 |
| ZNF423    | -0.04911209  | 6.567591445 | 0.082806483 |
| ATP2B3    | 0.025482728  | 6.015925897 | 0.082852402 |
| C5ORF22   | 0.055430269  | 6.930926102 | 0.082875632 |
| FLJ36208  | 0.045305049  | 6.348706947 | 0.082998638 |
| LOC643032 | 0.045369589  | 5.985036105 | 0.083017828 |
| NAP1L4    | -0.105641134 | 10.60675744 | 0.083047029 |
| ADAM21    | 0.057821213  | 6.616583297 | 0.083049268 |
| HEPACAM   | -0.031773658 | 6.089168101 | 0.083232647 |
| LOC388153 | -0.036517624 | 6.056377117 | 0.083366673 |
| C3ORF42   | -0.028549135 | 6.04684628  | 0.083427936 |
| CEP135    | -0.059146686 | 7.067503543 | 0.083459875 |
| LOC645478 | -0.042644495 | 5.965193802 | 0.083511006 |
| RPL6      | -0.070627296 | 12.61319105 | 0.083585335 |
| CNNM2     | -0.031049288 | 6.115583194 | 0.083585492 |
| APOBEC3G  | 0.063812805  | 6.498106348 | 0.083669869 |
| DDX18     | -0.083669393 | 9.30471491  | 0.083700148 |
| ZNF623    | 0.033449521  | 6.118743721 | 0.083708283 |
| LOC389833 | -0.103681439 | 6.678312585 | 0.083725156 |
| DTD1      | -0.071621827 | 7.6809104   | 0.083769378 |
| LOC642178 | -0.047259288 | 5.914172753 | 0.083831155 |
| RPP25     | -0.057395025 | 6.387541476 | 0.083858829 |
| XRCC1     | 0.063692849  | 7.146695107 | 0.083913508 |
| LOC642653 | -0.039705477 | 6.020187449 | 0.083917279 |
| LOC654002 | 0.082122184  | 5.983691808 | 0.083947321 |
| ZNF514    | 0.063328325  | 7.14860719  | 0.08395012  |
| SYT13     | -0.151892441 | 6.844425901 | 0.083986105 |
| MKRN3     | -0.044162605 | 6.085981089 | 0.083993035 |
| ZNF702P   | -0.060777118 | 6.50370331  | 0.084063193 |
| LOC647308 | 0.043840448  | 6.043413359 | 0.084066135 |
| DC36      | 0.041411186  | 6.276983921 | 0.08407261  |
| LOC652570 | 0.040870874  | 5.873596839 | 0.084120361 |
| FILIP1L   | -0.136441758 | 8.299940672 | 0.084185105 |
| GSC2      | 0.049428834  | 5.927248715 | 0.084278993 |
| PHOX2A    | -0.044853932 | 6.069948656 | 0.084288729 |

## DEG.infomation

|           |              |             |             |
|-----------|--------------|-------------|-------------|
| KIAA1600  | 0.082533746  | 8.733278054 | 0.084329188 |
| KLK1      | -0.045425886 | 6.261074295 | 0.084330809 |
| SEMA7A    | -0.036814031 | 6.076603219 | 0.084377257 |
| PCOLCE    | -0.127212286 | 8.659700259 | 0.084526786 |
| SATB2     | -0.049480522 | 6.166472671 | 0.084559083 |
| LOC731365 | -0.085982263 | 12.76109136 | 0.084561194 |
| CDK8      | 0.059685022  | 6.760068829 | 0.084605684 |
| LOC389607 | 0.04526645   | 6.073130096 | 0.084839285 |
| STX17     | 0.045504871  | 6.226121029 | 0.084843377 |
| LOC642558 | -0.031942413 | 6.013952168 | 0.084855709 |
| LCK       | 0.023852448  | 6.202391611 | 0.084982474 |
| C8ORF77   | 0.048135855  | 6.313232914 | 0.08501314  |
| WDR72     | 0.046322814  | 6.043792253 | 0.085024635 |
| APOBEC3D  | -0.045588673 | 6.104748268 | 0.085025341 |
| LOC647910 | 0.058728227  | 6.225014437 | 0.085076211 |
| LOC440359 | -0.138988437 | 11.09248906 | 0.08507746  |
| FAM62C    | 0.050319079  | 6.1379578   | 0.085084901 |
| HSPA1A    | -0.160357891 | 11.47102832 | 0.085088578 |
| LOC643018 | -0.044643475 | 6.103797047 | 0.085180856 |
| ZNF445    | -0.046524384 | 5.981965468 | 0.085202068 |
| C8ORF59   | 0.085140701  | 9.97170999  | 0.085209848 |
| SEMA4G    | 0.043675637  | 6.228492041 | 0.0852477   |
| LOC440067 | 0.042000491  | 6.040967432 | 0.085263288 |
| LOC648278 | -0.045102951 | 5.973443254 | 0.085295419 |
| C4ORF12   | 0.046530485  | 6.176344283 | 0.08536391  |
| HYLS1     | 0.05485461   | 7.125923118 | 0.085482732 |
| LCE1A     | 0.047638326  | 6.007212909 | 0.085492106 |
| COL8A2    | 0.075675712  | 6.924167311 | 0.085512753 |
| LOC651429 | 0.044401245  | 6.411255691 | 0.085582414 |
| LOC654230 | 0.040412015  | 6.053075118 | 0.085591108 |
| LOC643085 | 0.039644967  | 5.972959017 | 0.08560071  |
| LOC645210 | 0.040528908  | 6.129407044 | 0.085654443 |
| NUP88     | -0.078893881 | 9.36193273  | 0.085837079 |
| VSNL1     | 0.12308409   | 7.451017048 | 0.085884798 |
| RAC3      | -0.048941952 | 6.346892235 | 0.085925397 |
| LOC652357 | 0.037109668  | 6.10795058  | 0.085936668 |
| LOC400796 | 0.042308443  | 6.05642387  | 0.085948231 |
| LOC644066 | 0.037674625  | 6.055134723 | 0.085999836 |
| FLJ37201  | 0.045879726  | 6.11329751  | 0.086104153 |
| FRMPD2L2  | 0.021115185  | 6.10673689  | 0.086115412 |
| CNIH      | 0.097965966  | 9.403648592 | 0.086141313 |
| PDE6G     | -0.043935    | 6.45616637  | 0.086152202 |
| LOC644294 | 0.047833121  | 5.967603509 | 0.08615977  |
| DNAJC11   | -0.066129117 | 6.995931174 | 0.08636753  |
| OR5W2     | -0.050944882 | 5.936488726 | 0.086372273 |
| FBN1      | -0.083747304 | 6.629367916 | 0.086394513 |
| FLJ40292  | -0.049386173 | 5.961102968 | 0.086397735 |
| AURKAPS1  | -0.049865216 | 6.258671443 | 0.086401025 |
| GTSCR1    | -0.045213905 | 6.097594255 | 0.086402125 |
| CCDC102A  | 0.084498996  | 8.13740313  | 0.086530266 |
| NEU2      | -0.037424679 | 6.021243982 | 0.086602774 |

## DEG.infomation

|           |              |             |             |
|-----------|--------------|-------------|-------------|
| LOC646114 | 0.035921504  | 6.123242487 | 0.086615548 |
| LOC643837 | -0.047349844 | 6.085040137 | 0.086618134 |
| GNG12     | -0.128909974 | 7.434607445 | 0.086663413 |
| SAPS2     | 0.06973614   | 7.045949372 | 0.086667674 |
| LOC652578 | -0.038389923 | 5.980551953 | 0.086677065 |
| CCDC103   | 0.043038593  | 6.123111017 | 0.086735119 |
| ALDOB     | -0.062215927 | 6.601638436 | 0.086738561 |
| LCA5      | 0.045769003  | 6.321639369 | 0.086791254 |
| WBSCR27   | 0.050891885  | 6.175383118 | 0.086879818 |
| PLEKHF2   | 0.049573549  | 6.540309027 | 0.08689626  |
| LOC442028 | 0.056516101  | 5.831965066 | 0.086994856 |
| LOC650840 | -0.049691351 | 6.350091454 | 0.087069442 |
| HSD17B13  | 0.037664782  | 6.105924655 | 0.087121225 |
| ITGB4     | 0.036700348  | 6.262476173 | 0.087139483 |
| ARL13A    | 0.046081797  | 6.089591266 | 0.087181318 |
| LOC652614 | 0.042460577  | 6.194151318 | 0.087203296 |
| TLK2      | 0.098506325  | 7.944675488 | 0.087224627 |
| FLJ16369  | -0.047818515 | 5.90164916  | 0.087300986 |
| AIRE      | -0.118104702 | 10.9454358  | 0.087378049 |
| C10ORF10  | -0.18197584  | 8.802562849 | 0.087385688 |
| LOC652568 | -0.044108829 | 5.983138324 | 0.087541093 |
| APOBEC2   | -0.150510742 | 11.48509554 | 0.087569803 |
| TNRC6C    | -0.034978266 | 6.109909977 | 0.087591344 |
| IDH3B     | -0.077887243 | 11.20863924 | 0.087618706 |
| AKT1S1    | 0.056480156  | 6.400773993 | 0.087719735 |
| WNK2      | 0.11462246   | 7.440304429 | 0.087782835 |
| SCGB3A1   | 0.05409754   | 6.157687674 | 0.08780878  |
| LOC441737 | 0.050274215  | 6.13482024  | 0.087814487 |
| IL16      | 0.035711028  | 6.250091402 | 0.087831626 |
| TBCA      | 0.080150829  | 12.23121662 | 0.087846894 |
| LOC644705 | -0.044860803 | 6.019258147 | 0.087857533 |
| VPS53     | 0.047664677  | 6.182725202 | 0.087924183 |
| OR4C16    | -0.053206653 | 6.075243915 | 0.087926646 |
| LOC646128 | 0.037011696  | 6.195531222 | 0.087948636 |
| LTB4R2    | -0.036747951 | 6.017431577 | 0.087979493 |
| MBTD1     | -0.082899658 | 7.187325458 | 0.088019904 |
| IL17B     | 0.042940357  | 6.094533224 | 0.088103663 |
| FBXO44    | 0.029670524  | 6.130894002 | 0.088131299 |
| C2ORF77   | 0.058015101  | 6.036818855 | 0.088260424 |
| ZNF41     | 0.031406735  | 6.099330462 | 0.088274307 |
| ERP27     | -0.047817717 | 6.211749945 | 0.088281842 |
| LOC158381 | 0.042165976  | 6.337835028 | 0.088302485 |
| CLIP1     | -0.109341098 | 8.912416562 | 0.088320876 |
| MRPS23    | 0.080363486  | 9.061490811 | 0.088329186 |
| HINT1     | -0.090691256 | 11.96686311 | 0.088329871 |
| ARID5B    | -0.109381312 | 9.66831792  | 0.088405135 |
| LOC401622 | 0.060850024  | 6.661416895 | 0.088475949 |
| OR4K15    | 0.029360632  | 5.980696742 | 0.088483709 |
| STK11     | 0.094518072  | 6.708171783 | 0.088510105 |
| INPP5F    | 0.030943333  | 6.496389438 | 0.088531711 |
| C1ORF56   | 0.046074432  | 6.377250395 | 0.088594371 |

## DEG.infomation

|           |              |             |             |
|-----------|--------------|-------------|-------------|
| LOC646422 | -0.036811452 | 6.067368078 | 0.088667828 |
| LYPLA2P1  | -0.035841016 | 6.390645749 | 0.088678413 |
| C1ORF189  | -0.040321885 | 6.033738809 | 0.088686122 |
| FAHD2B    | 0.099062772  | 9.173534476 | 0.088730531 |
| INTS8     | 0.097990576  | 7.700382017 | 0.088744031 |
| LIG1      | -0.049896974 | 6.477578966 | 0.088744233 |
| CCDC85A   | -0.087165367 | 7.113815412 | 0.088782731 |
| NPLOC4    | -0.095643207 | 8.222814887 | 0.088865884 |
| SNX4      | -0.099237348 | 8.435234491 | 0.08886895  |
| ASCL2     | -0.051100455 | 6.493664067 | 0.08900516  |
| LOC283970 | 0.029521486  | 6.161148855 | 0.089055004 |
| PLEKHM1   | -0.062061926 | 7.46028024  | 0.089104224 |
| PLEKHM3   | 0.04859606   | 6.002836246 | 0.089187226 |
| OR6C4     | 0.053675139  | 5.884042984 | 0.089215905 |
| SUMO1P1   | 0.028659307  | 6.029859829 | 0.089273574 |
| LOC391045 | -0.05853379  | 6.05699034  | 0.089274068 |
| RBP3      | -0.050150616 | 5.945311332 | 0.089325618 |
| TRIP12    | 0.094060558  | 9.232304515 | 0.089326534 |
| LOC402644 | -0.190974059 | 7.914544233 | 0.089389184 |
| LOC653276 | -0.041063073 | 6.151846476 | 0.0893945   |
| NUP153    | 0.061834665  | 7.802077214 | 0.089408546 |
| LOC653125 | 0.032354179  | 6.167896249 | 0.089431397 |
| LIN52     | 0.073902599  | 6.713335376 | 0.089444638 |
| GPR25     | 0.050406919  | 5.986509019 | 0.08946408  |
| LOC652342 | -0.041197093 | 6.068748718 | 0.089513284 |
| LOC650905 | -0.038526885 | 5.982782788 | 0.089547295 |
| LOC652796 | 0.038770567  | 5.996942618 | 0.08958937  |
| ABT1      | -0.072458814 | 6.247316362 | 0.089625874 |
| ANKRD47   | -0.077389333 | 7.319670212 | 0.089655666 |
| LOC442454 | 0.099775711  | 12.72406829 | 0.089689216 |
| PCGF3     | 0.05005233   | 6.150546447 | 0.089697916 |
| LOC652453 | 0.045245971  | 5.978610689 | 0.089799812 |
| SULT1C4   | 0.04625808   | 6.270870029 | 0.089828797 |
| LOC645322 | 0.041785548  | 6.024250186 | 0.08989864  |
| GALC      | 0.073292208  | 8.076521373 | 0.089904924 |
| BGLAP     | 0.048139299  | 6.777862142 | 0.08991964  |
| CBX4      | 0.106224808  | 7.590948378 | 0.089991177 |
| FCAR      | -0.101757972 | 7.932110616 | 0.090026033 |
| PMCHL1    | 0.049701     | 6.281361899 | 0.090080146 |
| LGALS1    | 0.1062131    | 12.87151154 | 0.090177841 |
| KAT2A     | -0.073673617 | 8.70207013  | 0.09028489  |
| TMEM162   | -0.041202898 | 6.00598911  | 0.090287042 |
| STAG3     | 0.051515589  | 6.541497314 | 0.090312843 |
| GIP       | -0.036040854 | 6.001908172 | 0.090335426 |
| LOC643977 | -0.056586503 | 6.245324125 | 0.090367969 |
| STOML2    | -0.062653678 | 10.91021144 | 0.090405704 |
| NAGS      | 0.056451693  | 6.256438694 | 0.09044889  |
| MPP2      | -0.09629302  | 7.115865435 | 0.09049807  |
| MSRA      | 0.079314922  | 9.850707646 | 0.090605891 |
| SDHB      | 0.081923951  | 12.56034904 | 0.090611479 |
| SCML1     | -0.053364209 | 6.842600797 | 0.090698592 |



## DEG.infomation

|           |              |             |             |
|-----------|--------------|-------------|-------------|
| SLC1A1    | -0.051289262 | 6.163120534 | 0.090737696 |
| SPACA5B   | -0.035736724 | 6.045489293 | 0.090744211 |
| C16ORF82  | 0.045615806  | 5.961349628 | 0.090772665 |
| OR5AR1    | 0.029009509  | 6.057626097 | 0.090822058 |
| LOC654253 | 0.06841787   | 6.090581574 | 0.090837986 |
| COL8A1    | 0.163540879  | 8.581433343 | 0.090845135 |
| KIAA1660  | 0.035988551  | 6.078486815 | 0.090862785 |
| LRRC37A   | -0.047474732 | 6.217447287 | 0.09086522  |
| NME7      | 0.065351655  | 7.302048071 | 0.09102641  |
| DCAMKL3   | -0.041802295 | 6.0813713   | 0.091033893 |
| COL19A1   | 0.030416639  | 6.067269649 | 0.091074408 |
| CYP7B1    | 0.047870705  | 6.084391876 | 0.091116075 |
| C4ORF16   | 0.044077581  | 6.25750314  | 0.091126547 |
| MYL4      | -0.372316161 | 9.957156378 | 0.091154379 |
| C1ORF115  | -0.120951136 | 8.503933862 | 0.091170248 |
| SLITRK3   | 0.039689216  | 6.048542491 | 0.09118443  |
| HNMT      | 0.055087735  | 6.91480952  | 0.091290467 |
| OR13C3    | -0.041741511 | 5.994171561 | 0.091330467 |
| ZBTB6     | 0.064321732  | 6.2131887   | 0.091357388 |
| C1ORF100  | 0.04425289   | 6.094533316 | 0.091374131 |
| SLC2A4    | 0.070807173  | 6.61159177  | 0.091405407 |
| C1ORF125  | -0.034706264 | 6.000354656 | 0.091408071 |
| MPRIP     | -0.108741623 | 10.31962983 | 0.091443845 |
| MMP14     | -0.044062466 | 6.238302004 | 0.091485785 |
| DSCAML1   | -0.04421261  | 5.971162433 | 0.091558855 |
| TNFSF12   | 0.057895284  | 7.61690407  | 0.091655658 |
| LOC286239 | 0.0410692    | 5.86938779  | 0.091656036 |
| NOX4      | 0.17636406   | 7.617109106 | 0.091809279 |
| F2RL1     | -0.126761989 | 6.794077861 | 0.091861382 |
| MGC57359  | 0.021451702  | 6.151407071 | 0.091881337 |
| PSMC5     | -0.096741532 | 10.55921575 | 0.09188968  |
| RPS27L    | 0.091625909  | 10.82565758 | 0.091980469 |
| LOC442572 | 0.036834824  | 6.067075932 | 0.092018413 |
| LOC647107 | 0.04196208   | 6.05179132  | 0.092110949 |
| OR2AG1    | 0.045859949  | 6.183555555 | 0.092113197 |
| PCDHGA8   | -0.048602165 | 6.056952606 | 0.092131078 |
| FAM63A    | 0.090521521  | 8.560003205 | 0.092133345 |
| LOC643422 | 0.042484833  | 6.322155569 | 0.092150608 |
| LOC644634 | 0.025312492  | 6.272010606 | 0.092241676 |
| OR7A10    | 0.044002693  | 6.145202517 | 0.092250125 |
| ASTE1     | 0.057936398  | 7.115876071 | 0.092254291 |
| JAKMIP2   | -0.048513937 | 6.043081719 | 0.0923563   |
| LOC645435 | 0.046884364  | 6.022924627 | 0.092375264 |
| ASPHD1    | -0.028482279 | 6.029191609 | 0.092392482 |
| SUGT1P    | -0.046218114 | 5.976985891 | 0.092453445 |
| BCAN      | 0.030812602  | 6.275243595 | 0.092537433 |
| LOC652068 | -0.044137342 | 5.978626014 | 0.092544566 |
| MGC3020   | 0.053976002  | 6.484422617 | 0.092595154 |
| LOC647333 | -0.035005856 | 5.984652276 | 0.092613281 |
| ECHDC2    | 0.087209649  | 11.4369155  | 0.092620457 |
| FUSIP1    | 0.045881313  | 6.748241277 | 0.092624933 |

## DEG.infomation

|           |              |             |             |
|-----------|--------------|-------------|-------------|
| MGC40168  | -0.04124704  | 5.975820401 | 0.092639346 |
| PBOV1     | 0.028171445  | 6.08389604  | 0.0926606   |
| LOC644242 | 0.042321938  | 6.275517281 | 0.092688093 |
| DZIP1     | 0.037039858  | 6.053785167 | 0.092758049 |
| LOC440456 | -0.021569895 | 6.116353674 | 0.092762277 |
| LRCH3     | -0.058395025 | 6.919765903 | 0.092773249 |
| HOMER3    | -0.090608872 | 6.997781684 | 0.092778324 |
| ASB4      | 0.035241898  | 6.055803532 | 0.092792906 |
| LOC644886 | 0.042812134  | 6.018810863 | 0.092827644 |
| MRPL50    | -0.119318365 | 9.605427058 | 0.092871556 |
| ATRX      | 0.037580817  | 6.087953745 | 0.092877282 |
| ZNF324    | 0.066911228  | 6.96750978  | 0.092891373 |
| RUNX1     | -0.076723416 | 6.403216276 | 0.092921721 |
| MYSM1     | 0.050888513  | 6.125289683 | 0.092947681 |
| CCDC113   | 0.048958091  | 6.148057564 | 0.093035805 |
| RAB22A    | -0.06467425  | 8.66400644  | 0.093056538 |
| AGPAT6    | -0.077779316 | 6.545563537 | 0.093056903 |
| PLD5      | 0.158348347  | 6.214126441 | 0.093057792 |
| LOC143188 | -0.042118628 | 6.003799428 | 0.093059054 |
| ATG10     | 0.065739813  | 7.813568358 | 0.093149242 |
| IFNA10    | -0.047889025 | 6.13885191  | 0.093164196 |
| CYP24A1   | 0.044541866  | 5.937952265 | 0.093304833 |
| STS       | 0.046210282  | 6.311051387 | 0.093344728 |
| GSX2      | -0.041614306 | 5.886086427 | 0.093404812 |
| SLC13A2   | -0.048495447 | 6.144156337 | 0.09341229  |
| PPP3CA    | -0.061509417 | 6.815469962 | 0.093439237 |
| CD5L      | 0.052930568  | 5.927118032 | 0.093536872 |
| ZNF280B   | -0.047604702 | 6.069394012 | 0.093538748 |
| LGR8      | 0.040941097  | 5.942641322 | 0.093541233 |
| SMAD2     | -0.027512649 | 6.291331988 | 0.093609089 |
| ANGPT1    | -0.081008569 | 6.828625752 | 0.093620783 |
| SPRR1B    | 0.049888957  | 6.412131887 | 0.093693873 |
| LOC646374 | 0.040868226  | 6.055683847 | 0.093717119 |
| PTK9      | 0.068853608  | 6.200336829 | 0.093731047 |
| BRAP      | 0.070504843  | 5.938922969 | 0.093773929 |
| ETAA1     | 0.059290777  | 6.212182881 | 0.093789288 |
| MUCDHL    | -0.043257639 | 6.106765281 | 0.093793958 |
| HOXD9     | -0.04958052  | 6.017051844 | 0.093950115 |
| PIN1      | 0.061796967  | 11.2480276  | 0.093954326 |
| SNX25     | -0.043180685 | 6.925646194 | 0.093955409 |
| APOH      | -0.041467034 | 5.925476652 | 0.09395754  |
| SPESP1    | 0.050913337  | 6.350230308 | 0.094072331 |
| SLMO1     | 0.033520745  | 6.400153725 | 0.094108051 |
| ABCC11    | -0.026289363 | 6.10574482  | 0.094117481 |
| TMBIM4    | -0.06345461  | 11.51209032 | 0.094130381 |
| GPR82     | -0.029871641 | 5.98804824  | 0.094131852 |
| PCSK1     | -0.033321541 | 6.03904533  | 0.094209663 |
| LOC285479 | -0.044971643 | 6.175748772 | 0.094240357 |
| NPHS2     | 0.047594112  | 6.113300577 | 0.094253958 |
| ZNF821    | 0.066683996  | 7.086429448 | 0.094276158 |
| KIFC1     | -0.046599711 | 6.081427269 | 0.094357403 |

## DEG.infomation

|           |              |             |             |
|-----------|--------------|-------------|-------------|
| PHACTR1   | -0.125595612 | 7.422226594 | 0.09440316  |
| LRRC37A4  | -0.029589374 | 6.288197167 | 0.09450102  |
| SGTA      | 0.084320987  | 7.702385844 | 0.094627781 |
| GUSB      | -0.062738448 | 8.214121779 | 0.094696364 |
| HBBP1     | 0.041387957  | 6.151121221 | 0.094868447 |
| LOC441601 | 0.038925151  | 6.067640201 | 0.094869098 |
| LOC728863 | -0.057023856 | 6.208063195 | 0.094883177 |
| LOC644424 | -0.046555291 | 6.326689018 | 0.094887244 |
| GJD3      | -0.070274678 | 7.429489743 | 0.094960907 |
| TMPRSS6   | -0.051597143 | 5.938966981 | 0.094963464 |
| XPNPEP1   | 0.053134307  | 10.04957228 | 0.095021269 |
| CD3EAP    | -0.046183716 | 6.453471966 | 0.095112758 |
| TMEM45A   | -0.101283981 | 6.75057951  | 0.09524233  |
| LOC653497 | 0.040298006  | 6.279749029 | 0.095243235 |
| MBOAT1    | -0.053303032 | 6.491969163 | 0.095272629 |
| LOC442366 | -0.042829822 | 6.282301322 | 0.095316037 |
| ARMC9     | 0.064569672  | 6.283311359 | 0.095348003 |
| LOC440053 | -0.037644139 | 5.926007702 | 0.095351213 |
| LOC653876 | 0.041324664  | 6.375321792 | 0.095385892 |
| MRPL41    | -0.098237496 | 12.01774123 | 0.095440125 |
| ZNF219    | 0.089526413  | 8.059269094 | 0.095458151 |
| H2AFX     | -0.060152422 | 6.304057987 | 0.095504252 |
| BEGAIN    | 0.091541542  | 7.285525291 | 0.095513441 |
| LOC732111 | 0.045630881  | 6.225882273 | 0.095534655 |
| LOC648841 | 0.03970777   | 6.065733522 | 0.095582678 |
| LOC374920 | -0.044912127 | 6.490706992 | 0.095607372 |
| FLJ41200  | -0.069458033 | 6.195102121 | 0.095627335 |
| NOL4      | -0.030933593 | 6.131578574 | 0.095739475 |
| PRSS7     | 0.046620895  | 6.68378645  | 0.095805057 |
| LOC650803 | -0.076638111 | 6.276228809 | 0.095817814 |
| FAM22B    | 0.039468727  | 6.149128259 | 0.095817986 |
| FLJ11235  | -0.086802086 | 7.278964964 | 0.095823125 |
| USP21     | 0.038201171  | 6.878487927 | 0.095863731 |
| EFCAB2    | 0.08477886   | 6.154342045 | 0.096055907 |
| NADK      | -0.058503024 | 7.010461108 | 0.096068449 |
| C17ORF42  | 0.041354836  | 6.083990837 | 0.096083856 |
| LYST      | 0.031227999  | 6.314277627 | 0.096145739 |
| LOC651483 | 0.050955617  | 6.0894561   | 0.09619565  |
| LOC728789 | -0.036270282 | 6.082615644 | 0.096198752 |
| WDR37     | 0.078977958  | 8.926015018 | 0.096205255 |
| LOC728936 | 0.04017849   | 6.099733625 | 0.096262756 |
| RPL36AL   | -0.089793905 | 12.2964524  | 0.096388059 |
| LOC646064 | 0.048280243  | 6.415078257 | 0.09644897  |
| SULT2B1   | 0.038177424  | 6.708981    | 0.096468898 |
| NEFM      | -0.049446992 | 6.145596958 | 0.096485091 |
| CHRNE     | -0.044630395 | 6.290479677 | 0.096566117 |
| LOC643346 | 0.0380671    | 6.005806924 | 0.096627845 |
| LOC644266 | 0.036536193  | 6.15288881  | 0.096630267 |
| CD40LG    | -0.034805334 | 6.005885281 | 0.096669683 |
| FLJ44005  | 0.043753721  | 6.162427557 | 0.096690735 |
| PCSK5     | 0.097179117  | 7.906934846 | 0.096692597 |

## DEG.infomation

|           |              |             |             |
|-----------|--------------|-------------|-------------|
| TRIM4     | 0.063399479  | 7.798446714 | 0.096753451 |
| OR7A5     | 0.039842092  | 5.980867808 | 0.096759838 |
| XAB2      | 0.086473722  | 8.411385767 | 0.096794119 |
| LOC653874 | 0.094540364  | 6.674086916 | 0.096876937 |
| TRPM6     | -0.046793695 | 6.062655605 | 0.096877676 |
| THEG      | -0.034481064 | 6.245267096 | 0.096921937 |
| ZNF826    | -0.044349244 | 6.108316101 | 0.096964369 |
| ADAMTSL3  | 0.101480698  | 6.897043103 | 0.096984419 |
| RTL1      | 0.029963346  | 6.028174895 | 0.096988052 |
| UTP6      | -0.092609688 | 8.774689253 | 0.097091575 |
| RPS7      | -0.125493022 | 7.814176132 | 0.097168954 |
| WDR19     | 0.079095044  | 7.836975547 | 0.097225585 |
| KIAA1609  | -0.04129405  | 6.190932726 | 0.097253181 |
| RACGAP1   | -0.044066146 | 6.23165917  | 0.097288654 |
| C16ORF54  | 0.050787714  | 6.196755897 | 0.097297183 |
| LOC642397 | 0.023750776  | 6.026546583 | 0.097305273 |
| LCN9      | 0.040856119  | 6.010617864 | 0.097377866 |
| DEFB121   | -0.049845683 | 5.935482399 | 0.097403177 |
| CYSLTR1   | 0.050779642  | 6.304473034 | 0.097415225 |
| PCDHA3    | -0.02613101  | 5.97850366  | 0.097434787 |
| SLC41A2   | -0.049609501 | 6.086011504 | 0.097447173 |
| OR4F21    | 0.029569388  | 6.056567688 | 0.097479177 |
| GJA10     | -0.045635906 | 5.952259817 | 0.097506797 |
| EEF1B2    | -0.06660094  | 10.73151463 | 0.09751768  |
| GALNT13   | -0.041265108 | 6.069900657 | 0.097528896 |
| PHPT1     | 0.067180642  | 11.65514945 | 0.097536495 |
| LBA1      | 0.060157255  | 6.716363429 | 0.097609044 |
| THBS3     | 0.093826696  | 6.763708158 | 0.097610008 |
| MON1A     | -0.049032692 | 6.470416087 | 0.097730033 |
| ASH1L     | 0.042030523  | 6.303351387 | 0.097732933 |
| LOC729744 | -0.026104621 | 6.095313231 | 0.097811569 |
| LOC648827 | -0.047916398 | 6.169126499 | 0.097812681 |
| LOC642373 | -0.063835393 | 6.369374975 | 0.097842619 |
| ZNF280A   | 0.047278616  | 6.219587638 | 0.097862997 |
| LOC642968 | 0.039538749  | 6.135001691 | 0.097873139 |
| HSFX1     | -0.02645326  | 6.158704518 | 0.097900393 |
| LOC127295 | -0.105099797 | 10.21760318 | 0.097903439 |
| LOC146439 | 0.055153211  | 6.227484657 | 0.098007193 |
| OR4X2     | 0.04544248   | 5.948318169 | 0.098023329 |
| AKAP13    | 0.088372382  | 10.09336694 | 0.098050415 |
| LOC654010 | -0.043401351 | 6.000514893 | 0.098056192 |
| CATSPER3  | 0.064172068  | 6.068018601 | 0.09811846  |
| ATP5I     | 0.077728613  | 12.51940048 | 0.098146484 |
| GLP2R     | 0.038707128  | 5.945221045 | 0.098170503 |
| IMP3      | -0.058043263 | 11.0415682  | 0.098228538 |
| LOC391378 | 0.041643316  | 6.072136857 | 0.098253114 |
| CDC42BPA  | -0.050230026 | 6.889897961 | 0.098274301 |
| ASB11     | 0.055467428  | 6.348049031 | 0.098328659 |
| LOC388210 | -0.037126078 | 6.120357293 | 0.09836177  |
| MUC16     | 0.044909305  | 6.163080158 | 0.098422802 |
| VANGL2    | -0.067411543 | 6.605374746 | 0.098424072 |

## DEG.infomation

|           |              |             |             |
|-----------|--------------|-------------|-------------|
| LOC652553 | 0.045545227  | 5.948127909 | 0.098493452 |
| SLC5A10   | -0.022786933 | 6.030274114 | 0.098501254 |
| IRS4      | 0.043413453  | 6.447350157 | 0.098503753 |
| KPNA5     | -0.062592118 | 6.532978466 | 0.098652346 |
| LOC652674 | -0.036942547 | 5.999305534 | 0.098663072 |
| CAPS      | 0.052682013  | 6.585599831 | 0.098727588 |
| CRYGB     | 0.05650715   | 5.99277159  | 0.098768407 |
| SPTB      | 0.049665016  | 6.794119061 | 0.0988058   |
| LOC647855 | -0.038483955 | 6.075256301 | 0.098818381 |
| AMOTL2    | 0.060258573  | 6.083742421 | 0.098822189 |
| LOC652620 | -0.052180643 | 5.921615845 | 0.098889457 |
| RPRC1     | -0.067402589 | 12.16670555 | 0.098941703 |
| NCF2      | -0.067943901 | 6.139761142 | 0.098981579 |
| ART1      | 0.06014366   | 6.223850044 | 0.099005608 |
| PODXL     | -0.094683675 | 8.625089256 | 0.099026556 |
| SMURF1    | -0.041303983 | 6.271386564 | 0.099040797 |
| LOC647122 | 0.036647382  | 6.118956267 | 0.099041576 |
| OR5K4     | 0.031479152  | 6.164685962 | 0.09906604  |
| RBM34     | 0.090651198  | 8.259284018 | 0.099115121 |
| LOC340113 | 0.045178242  | 6.208248622 | 0.099135047 |
| INHA      | -0.080897619 | 6.263731852 | 0.099136183 |
| CT47.1    | 0.029177871  | 6.055700331 | 0.09920489  |
| MOGAT2    | 0.042643537  | 6.137624304 | 0.099284124 |
| LOC642183 | 0.041736569  | 6.267601451 | 0.099309964 |
| ALPI      | 0.045822657  | 6.248872186 | 0.09932036  |
| CES1      | 0.141508359  | 7.095863275 | 0.099362877 |
| PPT1      | -0.107840616 | 10.18777545 | 0.099384762 |
| LOC643258 | 0.042480475  | 5.947543786 | 0.099391233 |
| EDEM3     | -0.052334986 | 6.819604398 | 0.099403375 |
| COX6B1    | 0.082046927  | 12.98307901 | 0.099407766 |
| RY1       | -0.074167021 | 9.422078638 | 0.099447275 |
| NSD1      | 0.034479986  | 6.547094128 | 0.099447793 |
| RAB41     | 0.044825479  | 6.046145477 | 0.099452506 |
| ZBTB10    | 0.046731221  | 6.204394764 | 0.099484976 |
| SLC14A1   | 0.100333141  | 7.236773726 | 0.099601732 |
| LOC642933 | 0.033172511  | 6.030766807 | 0.099625433 |
| CCDC60    | -0.044594989 | 6.10582959  | 0.099641908 |
| HOXC6     | 0.028165162  | 6.279437185 | 0.099648245 |
| FGD4      | 0.038208057  | 6.212121522 | 0.099769792 |
| LOC642834 | -0.043321667 | 5.979751397 | 0.099879007 |
| C17ORF79  | 0.086641487  | 9.088333503 | 0.100003395 |
| SNTG1     | -0.035701643 | 5.936579983 | 0.10003916  |
| FRMD4B    | 0.027414934  | 6.062267733 | 0.100048647 |
| MRRF      | -0.04825958  | 8.245980528 | 0.100067939 |
| SKIP      | -0.040225008 | 6.350201795 | 0.100080524 |
| DGKD      | -0.083365346 | 6.539662189 | 0.1000813   |
| PROSC     | 0.078414392  | 9.516461738 | 0.100100727 |
| TRERF1    | -0.027053104 | 6.199442168 | 0.100143141 |
| LIPI      | 0.046238311  | 5.944638322 | 0.100164545 |
| TTRAP     | 0.088356542  | 6.410283695 | 0.100220514 |
| PRKACG    | 0.046196681  | 6.292983826 | 0.100232068 |

## DEG.infomation

|           |              |             |             |
|-----------|--------------|-------------|-------------|
| LOC644297 | -0.074689677 | 6.352931962 | 0.10027169  |
| LCE3D     | 0.042464704  | 5.9423863   | 0.100277922 |
| C16ORF47  | 0.041268433  | 6.251525883 | 0.100314656 |
| LOC646699 | 0.039130199  | 6.085765652 | 0.100327862 |
| FBXO39    | -0.037207456 | 6.004376279 | 0.100379834 |
| CRP       | -0.044546553 | 6.032106917 | 0.10039859  |
| LOC645931 | 0.051089836  | 6.08493505  | 0.100435543 |
| SMAD4     | 0.086092845  | 9.499881681 | 0.100490371 |
| ALCAM     | -0.128735081 | 6.91869311  | 0.10066059  |
| LOC653889 | -0.035385934 | 5.938249892 | 0.10075565  |
| PPM1H     | -0.07234902  | 6.870296396 | 0.100818481 |
| KRTAP3-2  | -0.024718053 | 6.096392642 | 0.100852308 |
| TMCO1     | -0.072194984 | 10.24929897 | 0.100886787 |
| KLHL8     | -0.067858615 | 8.082373789 | 0.100903237 |
| SDC4      | 0.104271408  | 8.795486312 | 0.100934499 |
| LOC399939 | -0.039448626 | 5.890755128 | 0.100935196 |
| TMEM125   | 0.048319618  | 6.149446345 | 0.101045649 |
| LOC390594 | 0.04341649   | 5.970020455 | 0.101066479 |
| LOC642795 | 0.041855113  | 6.206671715 | 0.101082551 |
| CSPG5     | 0.040958418  | 6.091365759 | 0.101102407 |
| SNORA7B   | -0.058290223 | 6.902779785 | 0.101127701 |
| QSOX2     | -0.064364604 | 7.39762737  | 0.101131027 |
| ATPBD3    | -0.067796555 | 6.594353473 | 0.10118406  |
| LPL       | 0.118363486  | 12.80783756 | 0.101213026 |
| HOXC5     | -0.040193414 | 6.078643343 | 0.101246782 |
| NAALADL1  | -0.055040608 | 6.594080968 | 0.101256274 |
| MRC2      | -0.051757324 | 6.334874508 | 0.101259398 |
| TMEM109   | -0.066067098 | 9.653927012 | 0.101271265 |
| NOLA2     | -0.080535555 | 8.829208784 | 0.10129562  |
| IQCF1     | -0.045581697 | 5.949167047 | 0.101306078 |
| CASC3     | 0.094091275  | 8.102454334 | 0.101335489 |
| TRRAP     | 0.076331352  | 9.33227148  | 0.1013692   |
| HRC       | 0.111280788  | 12.87388381 | 0.101440097 |
| LOC650361 | 0.039390345  | 5.985621935 | 0.101476516 |
| LOC654194 | -0.184052581 | 9.992748413 | 0.101558402 |
| INVS      | 0.030254471  | 6.429511245 | 0.101654015 |
| CLDN14    | -0.06552648  | 7.657134514 | 0.101744227 |
| CXORF27   | -0.049513107 | 6.161891017 | 0.101763692 |
| EEF1A2    | -0.075197443 | 13.58421045 | 0.101775842 |
| IKZF1     | -0.052076338 | 6.226977612 | 0.101855877 |
| IGFL3     | -0.051901752 | 6.419458656 | 0.101857898 |
| LOC645904 | -0.033167798 | 6.193106172 | 0.101913169 |
| LOC653217 | 0.047095988  | 5.910705711 | 0.101924692 |
| FBXO2     | -0.031456061 | 6.177593749 | 0.101958282 |
| ATXN7L1   | 0.047688277  | 6.139550915 | 0.101973609 |
| MUTYH     | -0.03834427  | 6.639975644 | 0.10205762  |
| CD2BP2    | -0.070400857 | 9.849828958 | 0.102063246 |
| EXOSC9    | 0.068794686  | 7.784400663 | 0.102089664 |
| ZNF624    | 0.037996074  | 6.125800374 | 0.102190591 |
| SAPS3     | -0.08512486  | 8.683756159 | 0.102289615 |
| OR51L1    | -0.040650041 | 5.956862638 | 0.102303531 |

## DEG.infomation

|            |              |             |             |
|------------|--------------|-------------|-------------|
| LCE2C      | 0.046986137  | 6.048277018 | 0.102312948 |
| LOC647009  | 0.060777995  | 7.068621209 | 0.10238741  |
| LOC653265  | 0.036582811  | 6.283897682 | 0.102401503 |
| OR1Q1      | -0.044706192 | 5.915213673 | 0.102468509 |
| C1ORF185   | -0.036380006 | 5.995001877 | 0.102472761 |
| MCOLN3     | 0.037240762  | 6.275254295 | 0.102488153 |
| OR5D16     | 0.032568304  | 6.169707527 | 0.102490506 |
| ZNF655     | -0.041636749 | 6.907702483 | 0.102590981 |
| CAB39L     | -0.043841382 | 6.82828448  | 0.102597541 |
| DIRAS2     | 0.030351624  | 6.027278596 | 0.102683256 |
| RBM33      | 0.077556424  | 8.617389995 | 0.102689112 |
| CYLC2      | -0.04789397  | 6.388023359 | 0.102716711 |
| CCNA1      | 0.0578133    | 6.289817792 | 0.102716949 |
| LOC643401  | -0.025178906 | 6.063048194 | 0.10276625  |
| TCP1       | -0.097184481 | 8.671640274 | 0.102842708 |
| CLDN18     | 0.02629875   | 6.288840859 | 0.102846979 |
| PDGFRL     | -0.134968089 | 8.1026666   | 0.102873737 |
| FAM71D     | -0.036450042 | 6.020242377 | 0.102880834 |
| SMAD1      | -0.029667839 | 6.049961403 | 0.102888111 |
| LOC283584  | 0.038916349  | 6.045306948 | 0.102891124 |
| SMPD3      | 0.055026313  | 6.266326634 | 0.102951324 |
| FLJ40113   | 0.022844032  | 6.217914168 | 0.10297441  |
| CS         | 0.094791401  | 10.90666193 | 0.103031115 |
| ZNF195     | 0.056685216  | 7.126028226 | 0.103046636 |
| KLRD1      | 0.027038179  | 6.111157639 | 0.103054928 |
| MAPK4      | -0.144375181 | 7.750929894 | 0.103113028 |
| TBC1D9     | 0.118431785  | 7.964217965 | 0.103247373 |
| BLVRA      | 0.063401334  | 9.504513552 | 0.10326998  |
| MFF        | 0.266235119  | 7.625511342 | 0.103280306 |
| MMD2       | -0.042140068 | 5.925545458 | 0.103288551 |
| LOC652667  | -0.040706955 | 6.074731856 | 0.10329017  |
| DLST       | 0.127194261  | 8.994299965 | 0.10351899  |
| GML        | -0.067242176 | 6.095808488 | 0.103538324 |
| DES        | 0.106705627  | 13.38668345 | 0.103568606 |
| LOC649583  | -0.040814367 | 6.085187354 | 0.103569824 |
| LOC441081  | -0.096297953 | 6.464154158 | 0.103590562 |
| FLJ11783   | 0.057268151  | 6.207881435 | 0.103644082 |
| C9ORF126   | -0.041954095 | 6.060673582 | 0.103668786 |
| SNHG10     | 0.069973229  | 6.443850396 | 0.103697212 |
| LOC649975  | 0.044360922  | 6.113675998 | 0.103745661 |
| MGC16075   | -0.039835126 | 6.0370686   | 0.103749821 |
| LOC646982  | -0.037505914 | 6.091536888 | 0.103764247 |
| GPR133     | -0.040305201 | 6.131868718 | 0.103830325 |
| ITM2A      | 0.11116429   | 10.00898414 | 0.103868302 |
| LOC654187  | 0.046702962  | 6.217644099 | 0.103970592 |
| C5ORF48    | -0.042042795 | 5.938737584 | 0.103995523 |
| MED15      | 0.04212439   | 6.642663726 | 0.103996592 |
| KRTAP10-11 | 0.063645043  | 6.923049508 | 0.104021864 |
| TFAP2A     | -0.03991037  | 6.539102586 | 0.104060796 |
| CCNT1      | 0.049353292  | 6.724176123 | 0.104066555 |
| OR5AP2     | 0.045740467  | 6.045222641 | 0.104112108 |

## DEG.infomation

|           |              |             |             |
|-----------|--------------|-------------|-------------|
| PFKFB1    | 0.043329809  | 5.983802455 | 0.104134403 |
| C2ORF52   | 0.030471754  | 6.155295707 | 0.104145706 |
| LOC646036 | -0.042876809 | 5.953356116 | 0.104152827 |
| LOC439992 | 0.045510041  | 6.092814843 | 0.104175884 |
| GRAMD1C   | 0.045795477  | 6.08810988  | 0.104286774 |
| LOC651894 | -0.100362994 | 11.63489952 | 0.104312726 |
| KCNE4     | -0.047871228 | 6.039818924 | 0.104338646 |
| LOC286411 | 0.032644031  | 6.140420966 | 0.104396266 |
| GPR115    | -0.043575465 | 5.969140796 | 0.104450796 |
| GPR20     | -0.046888462 | 6.204209021 | 0.104459795 |
| HERC2     | 0.060835881  | 8.420777901 | 0.104518131 |
| SLC27A5   | 0.06969127   | 6.448549308 | 0.104518887 |
| C9ORF144  | -0.048660461 | 6.081854685 | 0.104652722 |
| SRP19     | -0.095609587 | 8.798078622 | 0.104662906 |
| LOC401321 | -0.092022462 | 7.368410208 | 0.104674367 |
| TSEN34    | 0.066335518  | 9.284004438 | 0.104798429 |
| RBM15     | 0.070056555  | 8.555704103 | 0.104827212 |
| C1QTNF4   | 0.054333377  | 6.325782155 | 0.104850431 |
| CHRNA6    | 0.047128348  | 6.506601933 | 0.104858608 |
| TCN1      | -0.046381038 | 5.943901646 | 0.104870629 |
| ZNF562    | -0.084522793 | 7.68702732  | 0.104918645 |
| BCL2L11   | 0.025769773  | 6.081507169 | 0.104946788 |
| ANKS3     | 0.04895793   | 6.453044623 | 0.104964438 |
| LOC90835  | -0.05539359  | 6.475916108 | 0.104976455 |
| LOC643690 | 0.044628202  | 6.047864248 | 0.104992778 |
| LOC650546 | -0.025435189 | 6.158445918 | 0.105086951 |
| SARS      | -0.099942204 | 8.24431808  | 0.105211655 |
| LOC729764 | 0.126892572  | 7.40429551  | 0.105215906 |
| BIRC7     | 0.037799718  | 6.087257067 | 0.105399085 |
| LOC441178 | -0.040440643 | 5.930468513 | 0.105430026 |
| CRAMP1L   | 0.057310375  | 7.488954947 | 0.10559211  |
| LIPC      | -0.032300049 | 6.04284187  | 0.105664347 |
| HECTD1    | -0.078652361 | 10.50374964 | 0.105711339 |
| ANKRD58   | -0.066930549 | 6.001704676 | 0.10573862  |
| PTPN23    | -0.049751338 | 6.574238641 | 0.105882829 |
| PLUNC     | -0.042050444 | 6.008772079 | 0.105933269 |
| LOC648293 | -0.031731328 | 6.119040688 | 0.105967792 |
| HTR1B     | -0.039351789 | 5.900813968 | 0.106040299 |
| ZNF45     | 0.052802401  | 6.829110474 | 0.106081797 |
| C14ORF177 | -0.042099401 | 5.99738533  | 0.106134267 |
| TMEM55B   | -0.069832455 | 7.734851791 | 0.106160945 |
| OR5T1     | -0.038339543 | 5.869110492 | 0.106172867 |
| FAM53C    | 0.078939712  | 9.496366939 | 0.106258382 |
| ADAMTS3   | -0.064370019 | 6.013181343 | 0.10627825  |
| ACSS3     | 0.058956624  | 6.183391467 | 0.106278347 |
| TAAR2     | -0.04858651  | 6.142845652 | 0.106336326 |
| ART3      | 0.134870849  | 10.80895139 | 0.106382242 |
| LOC388177 | 0.036033272  | 6.114067507 | 0.106417243 |
| GIPR      | -0.040903491 | 5.94127019  | 0.106496225 |
| LOC652543 | -0.045335277 | 5.960215409 | 0.106664781 |
| STRAP     | -0.129189081 | 9.801442189 | 0.106720941 |



## DEG.infomation

|           |              |             |             |
|-----------|--------------|-------------|-------------|
| LOC650140 | -0.045711123 | 6.06280634  | 0.106742164 |
| TREX2     | -0.040656032 | 5.972106093 | 0.106777544 |
| MSH6      | -0.09412411  | 9.220761974 | 0.106855349 |
| IQCD      | 0.042127266  | 6.086016326 | 0.106885642 |
| FLJ45300  | 0.041872714  | 6.097023352 | 0.106888632 |
| LOC653451 | -0.035479256 | 5.976830564 | 0.106912639 |
| PCCA      | 0.116737452  | 9.04707856  | 0.106929991 |
| SFN       | -0.038665278 | 5.964504916 | 0.106931328 |
| C4ORF35   | 0.043213518  | 6.038851768 | 0.10697165  |
| CCL3L3    | -0.089601423 | 6.314177302 | 0.107017763 |
| ATP9A     | 0.086320769  | 8.878130946 | 0.107041838 |
| CA2       | -0.100051364 | 8.518527092 | 0.107204482 |
| SDHC      | -0.093654517 | 9.055690822 | 0.107283521 |
| APLN      | 0.115481244  | 6.801595336 | 0.107334221 |
| TRY6      | 0.061429543  | 6.017841335 | 0.107474856 |
| C1ORF109  | -0.057163189 | 7.139668808 | 0.107545738 |
| LOC645609 | 0.081942627  | 7.467541045 | 0.107563326 |
| LOC641849 | 0.113874924  | 7.465289921 | 0.107599988 |
| DEGS2     | 0.039073685  | 6.049755197 | 0.107624911 |
| MST4      | 0.060260306  | 6.896171885 | 0.107641731 |
| ZNF90     | -0.037955096 | 5.987927906 | 0.107669275 |
| LOC729185 | 0.03806078   | 6.073461617 | 0.107793101 |
| HIST3H2BB | 0.038135889  | 6.152570512 | 0.107862003 |
| FSD1L     | 0.042175626  | 6.35647548  | 0.10802792  |
| EXO1      | -0.026781063 | 6.061464094 | 0.108080851 |
| LOC339692 | 0.046310031  | 6.267648118 | 0.108186545 |
| LOC645590 | -0.034894759 | 6.11390921  | 0.108236187 |
| LOC644423 | 0.052809594  | 6.212181439 | 0.108245635 |
| KDELRL1   | -0.068863152 | 9.284554668 | 0.108251954 |
| MRC1L1    | -0.045576628 | 5.996030342 | 0.108279601 |
| ZAP70     | 0.029893474  | 6.167959547 | 0.108289254 |
| STAT2     | -0.090755774 | 9.637439541 | 0.108294045 |
| LOC727761 | -0.063802696 | 6.942101189 | 0.108395803 |
| SNORA65   | -0.037000191 | 6.240733084 | 0.108396894 |
| CT47.6    | -0.031733839 | 6.097727264 | 0.108398359 |
| CNGB1     | 0.05334629   | 6.42791429  | 0.108410284 |
| DDX19B    | -0.046563389 | 8.036033804 | 0.108519098 |
| LOC647038 | -0.038202698 | 6.026981434 | 0.108543606 |
| LOC643922 | 0.052146301  | 6.064804565 | 0.108612397 |
| DEDD2     | -0.089949834 | 8.507733728 | 0.108628162 |
| DDX60     | 0.071535249  | 7.067541814 | 0.108645285 |
| MCTS1     | 0.155457748  | 8.08111124  | 0.108845712 |
| WDR93     | 0.037406932  | 5.967508661 | 0.109010911 |
| MTF1      | -0.060583107 | 7.323169135 | 0.109046532 |
| PKMYT1    | -0.028210939 | 6.048133127 | 0.109066597 |
| LOC91664  | -0.047200118 | 6.326901927 | 0.10907079  |
| ACVR1C    | 0.043689679  | 6.01699108  | 0.109113723 |
| C16ORF7   | -0.064029826 | 7.658138029 | 0.109118966 |
| FBXO25    | 0.032506397  | 6.304606458 | 0.109151916 |
| KRTAP13-4 | -0.041409533 | 6.106589258 | 0.109195032 |
| LOC440361 | 0.043916414  | 5.947141324 | 0.109251041 |

## DEG.infomation

|           |              |             |             |
|-----------|--------------|-------------|-------------|
| LOC642820 | 0.043917213  | 6.149061157 | 0.109268752 |
| GJA3      | 0.091237681  | 7.63515526  | 0.109349065 |
| LOC388161 | 0.031043772  | 6.179605162 | 0.10935211  |
| NAG       | 0.090338033  | 7.659007637 | 0.109359273 |
| POLR2J4   | -0.022443804 | 6.200718053 | 0.109401748 |
| LOC644519 | 0.045539693  | 5.973704482 | 0.109448682 |
| COPS3     | -0.062796313 | 10.70014665 | 0.109488613 |
| RFXDC2    | -0.045984668 | 6.230211763 | 0.109530103 |
| ZNF642    | 0.041179518  | 6.253562324 | 0.10955073  |
| LOC645342 | -0.039547875 | 5.916752453 | 0.109591458 |
| LOC492303 | -0.046750427 | 5.993521025 | 0.109660079 |
| LOC390688 | -0.043836589 | 6.12470585  | 0.109708498 |
| CSF3      | -0.027014256 | 5.993176236 | 0.109732554 |
| LOC652051 | -0.062710043 | 6.018883885 | 0.109742879 |
| MIZF      | 0.039456642  | 6.853544957 | 0.109769152 |
| TAS2R45   | 0.045372517  | 6.102559961 | 0.109901944 |
| CCDC88A   | 0.059327691  | 7.876866099 | 0.109965305 |
| MBL1P1    | 0.048149106  | 6.414086441 | 0.109989493 |
| AICDA     | 0.04932348   | 6.076365125 | 0.109997414 |
| RREB1     | 0.031303481  | 6.371617179 | 0.110008229 |
| LOC646482 | -0.038430344 | 6.108666706 | 0.110017663 |
| ARTN      | -0.022710456 | 6.032287267 | 0.110046822 |
| CDC45L    | -0.05672712  | 6.196039432 | 0.110054782 |
| ZNF330    | 0.092259335  | 10.05425644 | 0.110079509 |
| FLJ14166  | -0.055049979 | 6.174867847 | 0.110130875 |
| ZNF121    | -0.050804278 | 6.110540568 | 0.110162057 |
| LOC653057 | 0.043640334  | 6.099199154 | 0.110182096 |
| SLC45A4   | -0.063327119 | 7.273986966 | 0.110232717 |
| VPS33A    | 0.049613288  | 7.084466637 | 0.110242213 |
| ASB6      | 0.04218191   | 6.573983699 | 0.110263172 |
| SLC26A11  | 0.02800415   | 6.260782916 | 0.110306164 |
| CYP4Z1    | -0.020090488 | 6.010751615 | 0.110344531 |
| LOC652767 | -0.042314815 | 6.010979631 | 0.110462701 |
| CDH24     | 0.028186071  | 6.100591409 | 0.110583789 |
| USP29     | 0.043118696  | 6.004514433 | 0.110647914 |
| ZNF268    | 0.029377644  | 6.266915338 | 0.110778562 |
| LOC643008 | 0.041744527  | 6.30157241  | 0.110784871 |
| GATA3     | 0.04266917   | 6.215872105 | 0.110848137 |
| LOC652726 | 0.08499224   | 6.571190685 | 0.110943403 |
| MPV17     | 0.08614595   | 8.675292767 | 0.11096993  |
| MAT2A     | -0.100681328 | 11.36558707 | 0.111016214 |
| TNRC4     | 0.04065544   | 5.959139512 | 0.111046754 |
| KHDRBS1   | 0.065036084  | 10.62814279 | 0.111055166 |
| PPM1K     | 0.105381839  | 8.5294008   | 0.111071322 |
| PDGFA     | 0.043951936  | 6.355012556 | 0.11109544  |
| UBE2D2    | 0.041698774  | 7.399576693 | 0.111135725 |
| GPR21     | 0.040448677  | 6.22725644  | 0.11115334  |
| FLJ42133  | -0.043802481 | 6.101423801 | 0.111231587 |
| PRKCA     | 0.10993043   | 7.730923047 | 0.111346827 |
| STX10     | -0.069950434 | 8.650569908 | 0.11137208  |
| LOC440297 | 0.067199279  | 6.188310719 | 0.111391127 |

## DEG.infomation

|           |              |             |             |
|-----------|--------------|-------------|-------------|
| FCRL5     | -0.030910728 | 6.183868504 | 0.111402855 |
| LOC649057 | 0.037580184  | 6.068033244 | 0.111416454 |
| CLSPN     | 0.054365345  | 6.105443375 | 0.111483155 |
| HIST2H2AC | -0.107934947 | 8.783678945 | 0.111534625 |
| LCE3A     | 0.049806925  | 5.925568008 | 0.111537495 |
| LRP12     | 0.05467764   | 6.589618292 | 0.111537519 |
| LOC143543 | 0.073403687  | 7.33900618  | 0.111547288 |
| ABCF3     | -0.06789146  | 7.15992777  | 0.111576932 |
| REEP6     | 0.06510881   | 6.827576488 | 0.111618741 |
| LOC374491 | 0.035869203  | 6.171206148 | 0.111625826 |
| DDEF2     | 0.109851065  | 7.600440908 | 0.11164339  |
| LOC400958 | 0.047029753  | 6.510365801 | 0.111666958 |
| LOC652606 | -0.049414754 | 6.018045835 | 0.111728378 |
| LOC729751 | -0.029895454 | 6.072557625 | 0.111781231 |
| TMC8      | -0.043681801 | 6.066877226 | 0.111817444 |
| RAB1C     | -0.038897504 | 5.99207371  | 0.111913499 |
| LOC285141 | 0.045864068  | 6.136117599 | 0.111920499 |
| ZNF263    | 0.087230146  | 8.047778989 | 0.111937936 |
| ICMT      | -0.076137411 | 7.801217167 | 0.111988993 |
| RASGRF2   | -0.043791038 | 6.054041061 | 0.112037699 |
| ZMYND10   | -0.042517856 | 6.06187892  | 0.112065377 |
| LOC728876 | -0.053069553 | 6.088388018 | 0.112090646 |
| LOC651357 | 0.035582725  | 6.04707648  | 0.112109821 |
| EDEM1     | -0.106239611 | 6.714907916 | 0.112112383 |
| BTN3A1    | 0.051645475  | 6.608207384 | 0.11240612  |
| IL5RA     | -0.033023676 | 6.32864341  | 0.112437727 |
| SLC6A17   | -0.044172579 | 6.056438445 | 0.112569895 |
| C20ORF82  | 0.048442348  | 6.337079651 | 0.112579634 |
| RRM2B     | 0.089624191  | 7.139920204 | 0.11258065  |
| DENND4A   | -0.036049081 | 6.461236426 | 0.112625651 |
| GPR52     | -0.031973556 | 5.970240335 | 0.112682191 |
| PIK3R5    | -0.049788653 | 6.272244239 | 0.112791552 |
| SPSB3     | -0.084718302 | 9.924435126 | 0.112974367 |
| XPO7      | -0.063912334 | 7.664474586 | 0.113045849 |
| CALM3     | -0.098220818 | 11.61666444 | 0.113049064 |
| YBX2      | -0.039979769 | 6.24105591  | 0.113053341 |
| LOC115648 | 0.049005566  | 6.257482802 | 0.113079843 |
| CLSTN2    | -0.051396358 | 6.484741771 | 0.113104091 |
| SLC4A10   | -0.040706543 | 5.963214718 | 0.113133283 |
| NECAP1    | -0.065876884 | 8.822155014 | 0.113224309 |
| DAZL      | -0.028330954 | 5.971459685 | 0.11334104  |
| LOC652197 | 0.037175889  | 6.05485711  | 0.113397838 |
| DCD       | 0.033169502  | 6.065174986 | 0.113442753 |
| LOC144776 | 0.036959986  | 6.187191189 | 0.11349201  |
| FAM106A   | -0.029128933 | 6.038354604 | 0.113492674 |
| POLR2H    | -0.1234449   | 8.843888696 | 0.11357951  |
| MAMLD1    | 0.095041762  | 6.678184156 | 0.113598038 |
| DCST2     | 0.042366786  | 5.932613229 | 0.113623078 |
| EN1       | 0.038825766  | 6.161572398 | 0.113631107 |
| LOC653262 | 0.03929505   | 6.155323681 | 0.113635922 |
| CDCA8     | -0.040391578 | 6.237576311 | 0.113638333 |

## DEG.infomation

|           |              |             |             |
|-----------|--------------|-------------|-------------|
| LPHN1     | -0.050079511 | 6.689136317 | 0.113644347 |
| PASD1     | -0.039486425 | 5.986495077 | 0.113725581 |
| TWF2      | 0.114712912  | 9.440031152 | 0.113742466 |
| SURF1     | 0.076657153  | 9.033818927 | 0.11376273  |
| NLF2      | -0.078301382 | 6.478341603 | 0.113773317 |
| C14ORF112 | 0.079569208  | 9.489471889 | 0.113795841 |
| TBXA2R    | -0.032761737 | 6.139964398 | 0.113824566 |
| BCL8      | 0.038977977  | 6.014505451 | 0.113866774 |
| LOC390192 | 0.05180131   | 6.111846004 | 0.113957593 |
| TAS2R49   | 0.040191375  | 6.152569472 | 0.114048211 |
| ANKHD1    | 0.045918658  | 6.875518491 | 0.114102199 |
| ZCCHC17   | 0.05959738   | 8.302805846 | 0.114103743 |
| PSMA1     | 0.085970893  | 10.00619442 | 0.114153381 |
| GOLGA5    | 0.067375974  | 8.592099681 | 0.11416318  |
| LOC728518 | 0.073039371  | 6.22816905  | 0.11417523  |
| CCDC82    | 0.037778945  | 6.030083482 | 0.114219682 |
| ADCY2     | 0.048847859  | 6.604756977 | 0.114221954 |
| COX19     | -0.07383108  | 7.857264799 | 0.114235891 |
| LOC387804 | -0.032559781 | 6.082179723 | 0.114259848 |
| ATG12     | 0.067097177  | 8.277029321 | 0.114340085 |
| NUDT17    | 0.042313971  | 6.182687113 | 0.114378509 |
| CT45-1    | -0.020518217 | 5.98153032  | 0.114544392 |
| LOC653604 | 0.032732523  | 6.182422663 | 0.114606718 |
| REEP4     | -0.041945964 | 6.414270594 | 0.114607726 |
| DOK4      | 0.070042721  | 6.94609855  | 0.114634755 |
| PIR       | 0.065198518  | 7.339664238 | 0.114654823 |
| BAMBI     | 0.140536604  | 10.30954947 | 0.114668613 |
| LOC652722 | 0.038891156  | 6.054730298 | 0.11486449  |
| LOC654135 | -0.05130329  | 6.388780797 | 0.114915402 |
| FBXL15    | 0.051968396  | 8.050966583 | 0.114959017 |
| LOC389669 | 0.03697524   | 5.905459962 | 0.115033396 |
| FKBPL     | -0.047650858 | 6.297540177 | 0.115226194 |
| SLC30A3   | -0.126314326 | 8.354411059 | 0.115255606 |
| HIST1H3J  | 0.04351293   | 6.103305352 | 0.115273341 |
| TYW3      | 0.098950534  | 7.690880953 | 0.115343203 |
| ADRA1A    | -0.03416578  | 6.302073733 | 0.115382328 |
| LOC644556 | 0.038562558  | 6.111491917 | 0.115388415 |
| GTPBP10   | 0.036939621  | 6.252367549 | 0.115428024 |
| TTC31     | 0.048917099  | 7.771400597 | 0.115435844 |
| LOC643980 | 0.032548849  | 6.081953108 | 0.115533404 |
| LOC647065 | -0.038645222 | 6.031771135 | 0.115555649 |
| ZBTB26    | 0.042305274  | 6.088970877 | 0.115602487 |
| XRRA1     | 0.050110972  | 6.189800226 | 0.115622784 |
| LOC643403 | 0.050360526  | 6.133540502 | 0.115642699 |
| NPAL1     | -0.043563089 | 6.042710448 | 0.115684275 |
| TPH2      | 0.042239856  | 6.020851191 | 0.11569634  |
| PDE11A    | -0.024175405 | 6.016574214 | 0.115712353 |
| LOC651059 | -0.034114417 | 6.046173785 | 0.115777304 |
| LOC647339 | 0.03797586   | 6.042852327 | 0.115805087 |
| LGALS12   | -0.048801808 | 6.243178539 | 0.115805391 |
| C6ORF78   | 0.039959583  | 6.200390849 | 0.115824874 |

## DEG.infomation

|           |              |             |             |
|-----------|--------------|-------------|-------------|
| MLF2      | -0.066559273 | 9.11334807  | 0.115888318 |
| HIST1H2AI | -0.061557224 | 6.578485604 | 0.116008866 |
| LOC648526 | 0.050981299  | 6.184952066 | 0.11606098  |
| GFRA1     | -0.02915092  | 6.160672185 | 0.116097173 |
| LOC653059 | 0.057201107  | 6.183069754 | 0.116107721 |
| FLJ25778  | 0.061182987  | 7.18144276  | 0.116144071 |
| PRC1      | 0.062652569  | 7.036295419 | 0.11615057  |
| PM20D2    | 0.071556707  | 7.011558544 | 0.116270104 |
| RAP2C     | -0.079592529 | 7.354881028 | 0.116276705 |
| MGC39900  | 0.031879749  | 6.348293023 | 0.116316246 |
| SV2C      | 0.041801051  | 6.066960882 | 0.116353256 |
| INSRR     | 0.04030146   | 6.066300079 | 0.116371921 |
| LOC653733 | 0.039450897  | 6.043739315 | 0.116434141 |
| KHDC1     | 0.05868081   | 6.31549916  | 0.116464594 |
| MTHFSD    | 0.049358285  | 6.680005477 | 0.116642702 |
| XAGE1E    | 0.048128246  | 6.146148799 | 0.116653511 |
| BTLA      | 0.031780626  | 6.230443534 | 0.116688455 |
| PC        | -0.030439512 | 6.222321512 | 0.116760593 |
| LOC653420 | 0.043786532  | 6.00654566  | 0.116787771 |
| ZIM3      | 0.044080665  | 6.062140864 | 0.117079705 |
| LOC642778 | 0.040383067  | 5.867828984 | 0.117302344 |
| USP4      | 0.04609481   | 7.598161493 | 0.117358723 |
| LOC645851 | 0.043986123  | 5.974959882 | 0.117370425 |
| LOC730919 | 0.044880506  | 6.168812896 | 0.117443246 |
| GOT1L1    | 0.042413905  | 6.045634877 | 0.11744403  |
| CDKN3     | -0.064708421 | 6.474651677 | 0.117539713 |
| LOC388122 | -0.042008372 | 6.370552922 | 0.117553671 |
| CASP2     | -0.058569009 | 8.251245555 | 0.117597985 |
| HSPC152   | 0.077418014  | 10.50906082 | 0.117618872 |
| ANKFN1    | -0.053614995 | 5.885196857 | 0.1176908   |
| LOC647269 | 0.038090269  | 6.087539447 | 0.117704972 |
| LOC440313 | 0.045705719  | 6.200244822 | 0.117737793 |
| PPP2R5D   | 0.046422574  | 7.156383684 | 0.117815538 |
| STX3      | -0.059091836 | 7.723722338 | 0.117834675 |
| RDX       | 0.072317942  | 8.909298552 | 0.117835187 |
| LGALS9C   | -0.051981919 | 5.76170589  | 0.117987708 |
| PDLIM7    | 0.128218331  | 9.489935365 | 0.118003441 |
| RCAN1     | 0.152346042  | 8.886962302 | 0.118010943 |
| LOC643226 | -0.0256414   | 6.092826562 | 0.118030181 |
| CAPN13    | 0.055937479  | 5.930938473 | 0.118051146 |
| IL7       | -0.032603933 | 6.016742569 | 0.118096682 |
| SMU1      | 0.102528789  | 7.033621116 | 0.118127067 |
| ACAP1     | 0.052594452  | 6.566166921 | 0.118169791 |
| TSGA10IP  | 0.041635485  | 6.179812986 | 0.118186116 |
| ADIPOR1   | 0.064238581  | 9.034006028 | 0.118237074 |
| CYCS      | 0.095923386  | 9.102319026 | 0.118346666 |
| FLJ12949  | 0.05041626   | 6.837732842 | 0.118383425 |
| BCL6B     | 0.152658684  | 6.890849756 | 0.118395734 |
| LOC93463  | 0.038862687  | 6.046518228 | 0.118442312 |
| BTBD9     | 0.069435992  | 7.482447063 | 0.118449393 |
| TSEN54    | -0.051722564 | 6.558605772 | 0.1184964   |

## DEG.infomation

|           |              |             |             |
|-----------|--------------|-------------|-------------|
| SLC9A3    | -0.044727829 | 6.0317772   | 0.118531878 |
| LOC642468 | 0.035873552  | 6.362303583 | 0.11861854  |
| LOC441956 | 0.025978484  | 6.125399127 | 0.118633108 |
| RAI14     | -0.164499835 | 8.558559738 | 0.118645015 |
| TTY21     | -0.031904646 | 6.029018248 | 0.118832311 |
| RASGEF1B  | 0.053971512  | 6.342761157 | 0.118852941 |
| LOC646508 | -0.044215221 | 6.674317652 | 0.118893409 |
| LOC643962 | -0.026603901 | 5.982628969 | 0.118916901 |
| LOC641989 | 0.041714082  | 6.453232089 | 0.118988523 |
| C12ORF59  | -0.046919021 | 6.001595632 | 0.119074091 |
| GP5       | 0.046476156  | 6.025547148 | 0.119134298 |
| LOC645981 | 0.037304967  | 5.990536331 | 0.119159267 |
| KLF3      | -0.032034809 | 6.167497878 | 0.119170571 |
| NTF3      | 0.073132595  | 6.639803399 | 0.119250024 |
| UCKL1     | 0.080461138  | 9.727488369 | 0.119293778 |
| LOC730686 | 0.043355075  | 6.266157855 | 0.11930897  |
| CD83      | 0.056764131  | 6.650308687 | 0.119309784 |
| BTG4      | -0.036555476 | 6.003741874 | 0.119353045 |
| MGC29506  | -0.05694813  | 6.341757806 | 0.119493265 |
| ARRDC1    | -0.044588279 | 6.256578171 | 0.119508198 |
| LOC645732 | 0.035903784  | 6.13495937  | 0.119518464 |
| EVI5      | -0.089661332 | 8.308638073 | 0.11967315  |
| LOC440926 | 0.058254361  | 11.59835421 | 0.119699321 |
| FAM155A   | -0.036426067 | 5.955960732 | 0.119702181 |
| OR51S1    | 0.041860869  | 6.012788368 | 0.119770763 |
| ZNF699    | 0.033412079  | 6.565141775 | 0.119806146 |
| SNORD15A  | 0.043547215  | 5.962167277 | 0.119829155 |
| EHMT2     | 0.033502455  | 6.251740244 | 0.119838616 |
| HMGNI     | 0.081639677  | 10.41684061 | 0.119897055 |
| UTS2D     | 0.027660594  | 6.047997336 | 0.119907745 |
| RSPO2     | 0.033092743  | 6.464304645 | 0.119941812 |
| RPL41     | -0.080689797 | 13.29328618 | 0.120008711 |
| PDZD7     | 0.037844755  | 5.935108353 | 0.120110757 |
| MUC12     | 0.030843062  | 6.198810245 | 0.120122727 |
| LOC400831 | 0.043590433  | 6.295037903 | 0.12023149  |
| OTOR      | 0.031210493  | 6.093766881 | 0.120286748 |
| DEAF1     | 0.035663289  | 6.575404106 | 0.120347482 |
| SEC16B    | -0.052005532 | 5.991374258 | 0.120380928 |
| KCNA10    | 0.034387239  | 5.934498343 | 0.120394274 |
| LOC644919 | 0.048741154  | 6.346747677 | 0.120415185 |
| USP19     | -0.046602855 | 6.363711434 | 0.120423855 |
| BPTF      | 0.039595995  | 6.762534803 | 0.120471883 |
| NXPH1     | 0.040298158  | 6.411811814 | 0.120475215 |
| LOC647022 | -0.041781872 | 5.962261921 | 0.120483301 |
| C12ORF53  | -0.042929561 | 6.034289055 | 0.120512423 |
| TTC21A    | 0.046199163  | 6.286640319 | 0.120552525 |
| MPO       | -0.038728919 | 6.043962846 | 0.120566461 |
| LOC653419 | 0.036662554  | 6.167581427 | 0.120603206 |
| LOC728351 | -0.040838921 | 6.211599739 | 0.120616138 |
| MSI1      | 0.044323859  | 6.337069351 | 0.120689018 |
| WDR57     | -0.062847498 | 7.974102689 | 0.120698368 |

## DEG.infomation

|           |              |             |             |
|-----------|--------------|-------------|-------------|
| GZMA      | 0.078585317  | 6.590274981 | 0.120710149 |
| TRIM67    | -0.046427115 | 6.169757733 | 0.120729971 |
| UIMC1     | 0.065657456  | 10.15304989 | 0.12081991  |
| TMEM26    | -0.05226185  | 6.271991389 | 0.120830619 |
| LOC648196 | -0.040779145 | 6.205013333 | 0.120897551 |
| SETX      | 0.082775535  | 7.182941718 | 0.121060824 |
| SPRY4     | -0.06272993  | 6.963567586 | 0.121075272 |
| TRIM34    | 0.02210935   | 6.01568801  | 0.121105336 |
| C1ORF120  | 0.034869498  | 6.084261549 | 0.121139231 |
| LOC644250 | -0.13412932  | 9.222428482 | 0.121143317 |
| ADAM17    | -0.040387416 | 7.028430053 | 0.121210372 |
| LOC648622 | -0.090581974 | 11.64074147 | 0.121432805 |
| METTL2B   | -0.045782123 | 6.273746904 | 0.121530515 |
| LOC653734 | 0.039127367  | 6.01498265  | 0.121555968 |
| LNPEP     | 0.042881716  | 6.896754877 | 0.12157773  |
| ABCA4     | 0.062909545  | 6.433252099 | 0.121673544 |
| LOC646428 | -0.040039182 | 5.984615117 | 0.12168422  |
| GJB3      | 0.024733702  | 6.066878159 | 0.121801632 |
| LOC643626 | 0.042325693  | 5.993023004 | 0.121829635 |
| DOM3Z     | 0.05616012   | 7.478213304 | 0.121832969 |
| TESK2     | 0.049453428  | 6.481447242 | 0.121888487 |
| CEACAM21  | 0.050012377  | 6.375306775 | 0.121890795 |
| C7ORF45   | 0.046973246  | 6.21794117  | 0.12220409  |
| LOC727759 | -0.039001946 | 6.322620615 | 0.12226138  |
| GABPAP    | 0.018195172  | 6.133327714 | 0.122309071 |
| MGC10701  | -0.033741543 | 5.986432989 | 0.122500801 |
| HEL308    | 0.043817005  | 7.015339106 | 0.122612839 |
| PPP4R1L   | -0.027025605 | 5.981000972 | 0.12261847  |
| A2M       | -0.130942234 | 10.8434455  | 0.122653718 |
| LOC641955 | 0.037741802  | 6.121116521 | 0.12276904  |
| LHX1      | -0.037937718 | 6.314358431 | 0.122793579 |
| LOC732316 | 0.043699018  | 6.057616551 | 0.122801539 |
| CIZ1      | 0.042334144  | 6.372690307 | 0.122806224 |
| RNF39     | 0.034317857  | 6.118738851 | 0.122818085 |
| KRT6A     | 0.042470903  | 6.042009981 | 0.122840746 |
| LOC645168 | -0.044182137 | 6.238579031 | 0.123035259 |
| EXPH5     | -0.040099954 | 6.127245998 | 0.123076538 |
| LOC653495 | 0.042506303  | 5.932192784 | 0.123106752 |
| BLCAP     | 0.107450904  | 8.870277068 | 0.123204217 |
| PPAP2C    | -0.027875025 | 6.137385918 | 0.123281634 |
| LOC401233 | 0.138559456  | 6.906201442 | 0.12328492  |
| RAB11FIP5 | -0.098730731 | 8.583683546 | 0.123305594 |
| ATP5C1    | 0.093981197  | 12.16534656 | 0.123324845 |
| PPP1R14D  | -0.045247418 | 6.421038218 | 0.123339067 |
| ACP1      | 0.08967374   | 10.01496564 | 0.123408895 |
| LOC391157 | -0.039185175 | 5.962185291 | 0.123409641 |
| PLA2G4A   | -0.041885317 | 6.200441526 | 0.123428316 |
| LOC645302 | 0.033291555  | 6.029804073 | 0.123437388 |
| DIRAS3    | -0.093455729 | 6.646212461 | 0.123499267 |
| TCF7      | 0.019049785  | 6.046336202 | 0.123515883 |
| PRLHR     | -0.036006183 | 6.022549105 | 0.123547073 |

## DEG.infomation

|             |              |             |             |
|-------------|--------------|-------------|-------------|
| LOC253724   | 0.025146265  | 5.967393494 | 0.123605503 |
| LOC338799   | 0.039083987  | 6.256382076 | 0.123639322 |
| RPL29P2     | 0.050146211  | 6.580604682 | 0.123652013 |
| SON         | 0.033886507  | 8.403638616 | 0.123689412 |
| FUK         | 0.057766921  | 7.85094944  | 0.123710496 |
| KRTAP12-1   | 0.041388679  | 6.208575446 | 0.123730164 |
| LOC284757   | 0.181289215  | 7.027492755 | 0.123756665 |
| RPL13       | -0.125453062 | 8.418801711 | 0.123756809 |
| PRG2        | -0.034788565 | 6.131182194 | 0.12395235  |
| ZNF486      | -0.122830005 | 12.17336425 | 0.123957806 |
| LOC644120   | -0.037277243 | 6.064659633 | 0.123967675 |
| LMLN        | 0.053679012  | 6.320602494 | 0.123994539 |
| LOC202459   | 0.047115742  | 6.405182356 | 0.123997532 |
| SLC12A1     | -0.038425293 | 6.03864971  | 0.124033396 |
| BARHL1      | 0.039289597  | 6.062976601 | 0.124110558 |
| LOC649365   | 0.061243247  | 6.422469328 | 0.12413183  |
| ZCCHC13     | 0.038154422  | 5.966009564 | 0.124224446 |
| LOC644334   | 0.035042961  | 6.183056925 | 0.124284908 |
| CNGA1       | -0.057760005 | 6.226599457 | 0.124340447 |
| STK25       | -0.074829604 | 8.578838483 | 0.124369241 |
| CHR415SYT   | -0.047431799 | 5.961045465 | 0.124414208 |
| SLC6A2      | 0.045432228  | 6.313207244 | 0.124450339 |
| C7ORF42     | -0.066815574 | 7.83615457  | 0.124464339 |
| NT5C        | -0.066318139 | 9.832159872 | 0.124490624 |
| MYL2        | -0.115462683 | 14.76423862 | 0.124509088 |
| LOC283202   | 0.02771754   | 6.102358744 | 0.124556221 |
| TSPAN16     | 0.034615975  | 6.081333631 | 0.124561608 |
| LOC643847   | 0.027734103  | 6.027432693 | 0.124612499 |
| LOC650122   | 0.039693482  | 6.054197632 | 0.124627054 |
| PEX26       | 0.030147865  | 6.208366981 | 0.124698652 |
| POLD4       | -0.071108605 | 7.225851356 | 0.124712341 |
| KRTAP10-1   | 0.038539592  | 6.00218996  | 0.124739281 |
| FLJ34931    | 0.060894464  | 6.320938266 | 0.124752578 |
| LOC646366   | 0.025304225  | 6.035147987 | 0.124763125 |
| CTXN3       | 0.03025439   | 5.977841749 | 0.124771485 |
| LOC283788   | -0.038631132 | 5.979086303 | 0.124777797 |
| CRYGA       | 0.036408278  | 6.36694821  | 0.124830188 |
| LOC648509   | -0.071356198 | 6.705396911 | 0.124845037 |
| PCDHA12     | 0.026797171  | 6.02182515  | 0.12490117  |
| SPACA1      | -0.039939812 | 6.239427141 | 0.124919949 |
| LOC643253   | -0.042933626 | 5.935255113 | 0.12504328  |
| PIWIL3      | 0.040053419  | 6.011023758 | 0.125043507 |
| LOC643235   | -0.039274535 | 6.062884145 | 0.125073733 |
| HOM-TES-103 | 0.045171971  | 6.311519362 | 0.12514067  |
| SNAP29      | -0.060695404 | 7.667778078 | 0.125155795 |
| UBE2G1      | -0.07605212  | 9.298915012 | 0.125183723 |
| LOC644362   | 0.039148223  | 6.100113006 | 0.125190562 |
| RCVRN       | -0.045390139 | 6.180665526 | 0.125207076 |
| OR2Z1       | 0.042578744  | 6.175447818 | 0.125230117 |
| AK5         | 0.027046498  | 6.015276048 | 0.125232912 |
| ABCD4       | 0.022771914  | 6.135292078 | 0.125280823 |



## DEG.infomation

|               |              |             |             |
|---------------|--------------|-------------|-------------|
| CLEC17A       | 0.039228567  | 6.026317831 | 0.125363854 |
| MYST3         | -0.076937265 | 8.639674415 | 0.125419214 |
| RBBP5         | 0.048329947  | 7.199962296 | 0.125481882 |
| PAPPA         | -0.10870441  | 7.161408055 | 0.125499839 |
| FLJ40852      | 0.040956078  | 6.410313019 | 0.125514234 |
| OR3A3         | 0.037138006  | 5.943102668 | 0.125515656 |
| LOC643581     | 0.035092135  | 6.11645393  | 0.12552993  |
| GSTO2         | 0.052489587  | 6.448444437 | 0.125575684 |
| LOC440080     | 0.021032639  | 5.991001243 | 0.125619445 |
| LOC652571     | 0.033617125  | 6.07147678  | 0.125654605 |
| SGSH          | -0.079761034 | 8.07226696  | 0.125718636 |
| WNT11         | 0.045775513  | 6.309519055 | 0.125753384 |
| RPL11         | -0.060935698 | 13.46343954 | 0.125805878 |
| LOC652011     | -0.038066618 | 5.903336386 | 0.125910384 |
| EIF2AK1       | -0.05673374  | 10.11663517 | 0.125914539 |
| FLJ46838      | -0.034129113 | 6.32140057  | 0.125941608 |
| FLJ20309      | 0.040281628  | 6.141825382 | 0.125958163 |
| GPR109B       | 0.025572922  | 6.22868175  | 0.126004576 |
| KLHL32        | -0.040346675 | 6.032033229 | 0.126077473 |
| KCNAB2        | -0.028049082 | 6.200684676 | 0.126092597 |
| GFRA3         | -0.060277197 | 6.460678475 | 0.126114057 |
| UNQ9433       | -0.043950405 | 5.97620521  | 0.1261257   |
| LOC645705     | -0.042281175 | 5.982407167 | 0.126180999 |
| LOC647286     | 0.025456002  | 6.022743278 | 0.126292594 |
| LOC644973     | 0.038323806  | 6.110583602 | 0.126326788 |
| CXCR6         | -0.040117359 | 6.071180605 | 0.126364649 |
| GSS           | -0.063615964 | 7.626413452 | 0.126379132 |
| LOC641694     | -0.046132804 | 5.901098494 | 0.126396004 |
| LOC642891     | 0.039501807  | 6.05334533  | 0.126419525 |
| CRIP2         | -0.092608011 | 11.96823486 | 0.126421963 |
| KIAA0090      | -0.064782675 | 8.131483014 | 0.126425751 |
| KRT24         | -0.036938579 | 6.318521845 | 0.126605337 |
| DKFZP686C2281 | 0.039959319  | 6.03375015  | 0.126620472 |
| CHST4         | -0.036702522 | 5.991831404 | 0.12665683  |
| RNF185        | 0.053192071  | 6.916824775 | 0.126659434 |
| TADA3L        | 0.039906781  | 7.104726365 | 0.126661037 |
| OR14J1        | -0.03771188  | 6.062342923 | 0.126714048 |
| ZNHIT2        | -0.071511755 | 6.760033872 | 0.126724052 |
| LOC728564     | -0.068761724 | 8.309729327 | 0.126730581 |
| NKG7          | 0.102276872  | 6.774771448 | 0.126746302 |
| HMGB3         | -0.052293131 | 6.512969783 | 0.126791247 |
| TP53TG3       | 0.050555615  | 6.264234552 | 0.126814873 |
| LGALS2        | 0.067703121  | 6.214514916 | 0.126920243 |
| LOC728729     | -0.037713448 | 5.984809811 | 0.127016874 |
| LOC730432     | 0.067279974  | 8.981260404 | 0.127275132 |
| PRR12         | 0.041222689  | 6.280054286 | 0.127275767 |
| RAF1          | -0.055206661 | 9.870499811 | 0.127276508 |
| SPATA19       | 0.046848737  | 6.072836516 | 0.127301201 |
| SYN3          | -0.030091248 | 6.040997264 | 0.127302242 |
| CXORF50       | -0.036145074 | 5.982924443 | 0.127375558 |
| CLEC4F        | 0.041864756  | 6.089729826 | 0.127397442 |

DEG.infomation

|           |              |             |             |
|-----------|--------------|-------------|-------------|
| PCDH24    | 0.04442174   | 6.561127869 | 0.127474967 |
| LOC642644 | 0.055232772  | 5.990386259 | 0.127497168 |
| ABCC6     | 0.022027265  | 6.089249249 | 0.127526608 |
| LOC644008 | -0.04090792  | 5.963283147 | 0.127716152 |
| LOC440820 | -0.046146248 | 5.952550349 | 0.127730084 |
| ZIC2      | -0.040272886 | 6.083396456 | 0.127731267 |
| SPATS1    | -0.040300731 | 5.917942581 | 0.127750596 |
| COX7A1    | 0.071199652  | 14.14286209 | 0.127756748 |
| NLRP9     | 0.037052736  | 5.964832646 | 0.127758869 |
| LOC646243 | 0.028132057  | 6.092198496 | 0.127805625 |
| LOC653609 | 0.037854256  | 6.018834881 | 0.127870424 |
| TBKBP1    | 0.042340693  | 6.342567738 | 0.127904142 |
| MED30     | 0.071904487  | 8.500911209 | 0.127916823 |
| C1ORF106  | 0.067001224  | 6.450285549 | 0.128036962 |
| TMEM132C  | 0.033803632  | 6.067883333 | 0.128086257 |
| ZIC5      | 0.039570952  | 6.195091995 | 0.128115785 |
| MRVI1     | -0.034799226 | 6.190191721 | 0.128151935 |
| ZWINT     | -0.023589314 | 6.087292153 | 0.128325032 |
| SBNO1     | 0.04784953   | 6.374025839 | 0.128345364 |
| SSX1      | 0.02454474   | 5.991319128 | 0.128385378 |
| ELK3      | 0.038975886  | 6.250220394 | 0.128473744 |
| SAC3D1    | -0.070919015 | 7.064516879 | 0.128500489 |
| RSRC2     | 0.068969824  | 8.347963311 | 0.128577955 |
| LOC642290 | -0.03847224  | 6.148689687 | 0.128632996 |
| ADAM2     | 0.046744825  | 6.253645307 | 0.128757379 |
| RCHY1     | 0.046161939  | 6.516684201 | 0.128789659 |
| REXO4     | -0.106061664 | 7.636344455 | 0.128814746 |
| C19ORF36  | -0.027182931 | 6.108997848 | 0.128873637 |
| GPR35     | 0.042454602  | 6.036860262 | 0.12923187  |
| KIFC2     | -0.083677627 | 6.567942931 | 0.12925572  |
| PKD1L3    | 0.046835156  | 6.129942454 | 0.129302113 |
| FAM24B    | 0.028590338  | 6.224116321 | 0.129363572 |
| SCGB1A1   | -0.044337326 | 6.055362133 | 0.129389439 |
| HPGD      | 0.060585128  | 6.402037    | 0.129488426 |
| OSBPL6    | 0.045428076  | 6.715278247 | 0.129488477 |
| MGC39372  | 0.065736573  | 6.300483912 | 0.129533993 |
| GABRA4    | 0.038236038  | 6.111042348 | 0.129538114 |
| RIMS4     | 0.040520604  | 6.373992945 | 0.129624128 |
| LOC643558 | 0.020173317  | 6.17134832  | 0.129698581 |
| EIF2C3    | 0.030940834  | 6.457617622 | 0.129770133 |
| LOC647947 | 0.038263887  | 6.29686518  | 0.129919705 |
| RGS14     | 0.040924491  | 6.358460605 | 0.130028603 |
| C6ORF206  | 0.037842307  | 6.016270924 | 0.130211461 |
| LEMD3     | 0.066100762  | 8.588787905 | 0.130217905 |
| H3F3A     | 0.046598186  | 12.63510353 | 0.130252014 |
| FLJ43950  | 0.021276856  | 6.158244885 | 0.130305174 |
| FAM166A   | 0.040546478  | 6.107034149 | 0.130345595 |
| PRR11     | -0.043982805 | 6.080818848 | 0.130353233 |
| KLKB1     | 0.086093653  | 6.524014764 | 0.130373854 |
| WDR63     | 0.046927909  | 6.0848446   | 0.130375451 |
| LOC642716 | 0.036779388  | 6.16135595  | 0.130417669 |

## DEG.infomation

|           |              |             |             |
|-----------|--------------|-------------|-------------|
| LOC642954 | 0.035142226  | 6.112940572 | 0.13042972  |
| SCRT1     | 0.025245456  | 6.208419188 | 0.130452506 |
| RPL36     | -0.083861194 | 10.58499931 | 0.13047637  |
| FLJ38969  | 0.03742496   | 6.16701904  | 0.130511114 |
| MMP19     | -0.025242605 | 6.132408337 | 0.130544472 |
| GABRA1    | 0.03654055   | 6.008990452 | 0.130547837 |
| ENTPD2    | 0.033184186  | 5.975006548 | 0.130568049 |
| TSSK2     | 0.042182286  | 6.00654615  | 0.130588509 |
| HOXD3     | 0.04949477   | 6.763423192 | 0.130706869 |
| LOC644725 | 0.041929054  | 6.252989133 | 0.130774709 |
| EFNA4     | -0.042847544 | 7.147894316 | 0.130800957 |
| C12ORF35  | 0.055175915  | 7.042552725 | 0.130848239 |
| CHEK1     | -0.037085103 | 6.360727168 | 0.130934534 |
| C20ORF152 | -0.044124352 | 5.964795871 | 0.131049004 |
| ZFY       | 0.074903938  | 6.249961058 | 0.131132608 |
| LOC647274 | -0.035754474 | 6.192102751 | 0.131140213 |
| SAMD10    | -0.042585384 | 6.25091324  | 0.131249615 |
| LOC652209 | -0.037538603 | 6.001579845 | 0.131337722 |
| FAM83E    | 0.03985842   | 5.958004263 | 0.131374273 |
| LOC389102 | 0.036718183  | 6.333707852 | 0.131431977 |
| NDUFA12   | -0.072416985 | 12.08638643 | 0.131441474 |
| C20ORF94  | 0.051281177  | 6.719812923 | 0.13145305  |
| C14ORF100 | 0.060425159  | 8.216776053 | 0.131480535 |
| LOC646717 | 0.035184321  | 6.067371581 | 0.131485423 |
| SEC62     | -0.054254756 | 7.251980717 | 0.131497445 |
| BRCC3     | -0.049675551 | 6.902759229 | 0.131600577 |
| CICE      | -0.068484381 | 7.768665931 | 0.131738213 |
| LMX1A     | 0.020811715  | 5.987725094 | 0.131780083 |
| LOC649199 | 0.040956304  | 6.05612526  | 0.131841998 |
| OR5K2     | -0.042531427 | 6.116411422 | 0.13188046  |
| LOC441326 | -0.030527685 | 5.994983442 | 0.131900087 |
| LOC642250 | -0.13220677  | 11.33360036 | 0.131921126 |
| NLP       | -0.061479491 | 6.38728078  | 0.132007564 |
| CCL3      | -0.049439679 | 6.166446765 | 0.132056083 |
| LOC647466 | -0.036212855 | 5.960575773 | 0.132101165 |
| LOC641716 | 0.035711192  | 6.161081153 | 0.132188    |
| NFATC4    | -0.041580649 | 6.134748458 | 0.132191076 |
| SNORD14A  | -0.114548637 | 6.819038297 | 0.132237641 |
| FOXP2     | 0.031074397  | 6.089639931 | 0.132337903 |
| LOC643389 | -0.038267149 | 6.227436132 | 0.132548405 |
| PCM1      | 0.079334909  | 9.657624637 | 0.132608159 |
| TXNDC2    | 0.025647503  | 6.087890326 | 0.132668505 |
| ATP5O     | 0.07090392   | 13.03953181 | 0.132669108 |
| KRT75     | 0.041230078  | 6.028578961 | 0.132706932 |
| LOC653463 | 0.040535296  | 6.249015228 | 0.132714697 |
| GDAP1     | 0.030867644  | 6.076346203 | 0.132755329 |
| CARD14    | -0.025696299 | 6.036879381 | 0.132864707 |
| FAIM3     | -0.107975161 | 7.215722636 | 0.132908031 |
| TNRC9     | 0.039776613  | 5.856939309 | 0.132961386 |
| LOC643482 | -0.035032332 | 6.143536198 | 0.132999303 |
| SLC4A9    | -0.046771996 | 5.972224636 | 0.133015658 |

## DEG.infomation

|           |              |             |             |
|-----------|--------------|-------------|-------------|
| LOC644188 | 0.049064075  | 5.989034817 | 0.1330552   |
| LOC646431 | -0.040813522 | 6.100822596 | 0.133092174 |
| LOC284067 | 0.039793721  | 6.197028467 | 0.133146268 |
| C6ORF184  | -0.023806228 | 6.06797648  | 0.133147143 |
| NDUFB6    | 0.068548952  | 11.19616958 | 0.133155659 |
| UBLCP1    | 0.082915383  | 8.446488879 | 0.133157444 |
| CRKRS     | -0.053339931 | 6.634664352 | 0.133263838 |
| LOC729393 | 0.038020793  | 6.255870361 | 0.133362294 |
| LOC653651 | -0.043435573 | 5.966864534 | 0.133433231 |
| LOC650721 | -0.037014771 | 6.054511103 | 0.133503826 |
| INSM1     | 0.040575683  | 6.527977443 | 0.133556632 |
| MGC15705  | 0.037197729  | 6.105752565 | 0.133581417 |
| MRLC2     | -0.080067144 | 11.90742788 | 0.133696902 |
| OR10AG1   | -0.042308188 | 6.021460911 | 0.133788246 |
| NSUN6     | 0.088000388  | 6.544196938 | 0.13383797  |
| KCNN4     | -0.068985682 | 6.241247928 | 0.133839994 |
| KIF26B    | -0.03826086  | 6.272816046 | 0.133881067 |
| IPO8      | 0.143852819  | 7.746439948 | 0.133903654 |
| LOC653781 | 0.035563735  | 6.328447896 | 0.134001395 |
| LOC654109 | 0.056026345  | 5.930054139 | 0.134016028 |
| CYCSL1    | 0.094639978  | 10.54982981 | 0.134076108 |
| LOC196913 | -0.039443898 | 5.943488343 | 0.134083492 |
| LOC388923 | 0.032905195  | 6.067993355 | 0.134232584 |
| POU2F2    | -0.037516536 | 5.932141478 | 0.134258924 |
| LOC145783 | 0.046263551  | 6.532311963 | 0.134345177 |
| LOC652481 | -0.097455789 | 8.533337415 | 0.13436166  |
| GALNT12   | -0.036061829 | 6.470160981 | 0.134404364 |
| SEMA3D    | 0.037333082  | 5.940106828 | 0.134429641 |
| PTPRK     | -0.098726676 | 8.403370474 | 0.134515368 |
| BSND      | 0.04473424   | 6.2671161   | 0.134515422 |
| HIATL1    | -0.034391909 | 7.036901807 | 0.134586569 |
| LOC647566 | -0.040092928 | 6.053160692 | 0.134594715 |
| LOC442590 | 0.039355648  | 6.065149022 | 0.134603004 |
| LOC648377 | 0.035597836  | 6.059055093 | 0.134633749 |
| UNKL      | 0.030279626  | 6.356362155 | 0.134736546 |
| FBXW8     | 0.034475531  | 6.68240849  | 0.134737626 |
| ZNF215    | -0.034153238 | 6.00992114  | 0.134791756 |
| HAO2      | 0.03216695   | 6.011347755 | 0.13490679  |
| LOC642969 | 0.041766294  | 6.321535002 | 0.134957985 |
| SNX3      | 0.079043205  | 11.49117085 | 0.134982866 |
| CDC42BPG  | 0.038584278  | 5.940819523 | 0.135026366 |
| NTRK3     | -0.029539508 | 6.174949286 | 0.135034884 |
| FAM27L    | -0.041947377 | 5.992202251 | 0.135302159 |
| FLJ37078  | -0.068451599 | 6.509590152 | 0.135421746 |
| KLKP1     | -0.042057792 | 5.996353709 | 0.135502857 |
| KLC1      | 0.074543999  | 9.025228136 | 0.135531077 |
| SH2D4A    | -0.054532573 | 6.574122449 | 0.135600699 |
| C5        | 0.051297873  | 6.959264134 | 0.135626177 |
| ANAPC11   | 0.057838713  | 8.363677902 | 0.135629495 |
| LOC651060 | 0.041623958  | 6.265526464 | 0.135672979 |
| LOC285176 | -0.078809149 | 12.79181912 | 0.135683986 |

## DEG.infomation

|           |              |             |             |
|-----------|--------------|-------------|-------------|
| HPRT1     | 0.05891999   | 9.006078128 | 0.135733782 |
| OR5B21    | -0.039112283 | 6.08418557  | 0.135748623 |
| PSMB1     | -0.079105028 | 12.07546041 | 0.13575578  |
| SLC17A8   | 0.03785817   | 5.95777318  | 0.135769491 |
| SULT1B1   | -0.037152866 | 6.054930743 | 0.135846751 |
| VDR       | -0.031009804 | 6.001944667 | 0.135865737 |
| ZC3H15    | 0.080134885  | 8.074148513 | 0.136019476 |
| PTBP2     | -0.059477256 | 7.690291427 | 0.136056628 |
| TNS3      | 0.076418709  | 10.06307338 | 0.136058967 |
| LOC650132 | -0.048178317 | 6.133080184 | 0.136078616 |
| GBA2      | -0.049305689 | 7.293617459 | 0.136098954 |
| SKI       | -0.047340624 | 7.075175322 | 0.136200656 |
| RNF148    | -0.040381998 | 6.238489465 | 0.136264421 |
| MRPL48    | 0.087297743  | 7.729874607 | 0.136303155 |
| STOX2     | -0.097670696 | 8.711040413 | 0.136321651 |
| NLRP1     | 0.03323381   | 6.147923034 | 0.136368496 |
| CLEC4C    | -0.031568279 | 6.156409299 | 0.136401864 |
| LOC728990 | 0.03760821   | 6.109707406 | 0.136435098 |
| STRA6     | 0.034870988  | 5.996571434 | 0.136551936 |
| RNASE8    | -0.037211855 | 5.988257237 | 0.136569928 |
| LOC644065 | -0.040214129 | 5.925274361 | 0.136598482 |
| NCOA6IP   | 0.04683369   | 6.858644811 | 0.136601082 |
| FCRL2     | -0.023894234 | 6.091930704 | 0.136646255 |
| LOC643923 | -0.028196908 | 6.07745434  | 0.136647279 |
| AARSD1    | 0.075766796  | 8.524333152 | 0.136669087 |
| C20ORF11  | 0.09969462   | 9.265982718 | 0.136678188 |
| RIC8B     | 0.101905619  | 7.264224157 | 0.136776811 |
| AKAP9     | 0.056885166  | 6.174485429 | 0.136815008 |
| LOC647169 | 0.023325647  | 6.039274377 | 0.136845596 |
| ANO4      | -0.038521829 | 6.12912088  | 0.136853188 |
| SEC31B    | 0.038062271  | 6.110490389 | 0.13722912  |
| SNORD4B   | -0.038762837 | 6.178266765 | 0.137286361 |
| LOC649712 | -0.03526152  | 6.199088175 | 0.13733014  |
| C1ORF76   | -0.042747546 | 6.533754029 | 0.137333082 |
| SPINT4    | -0.040483441 | 5.882100254 | 0.137508155 |
| HCRTR2    | 0.042921787  | 6.290349912 | 0.137524326 |
| RABL2A    | -0.036887431 | 6.534115576 | 0.137589818 |
| FGFBP2    | 0.142996512  | 6.947476946 | 0.137623858 |
| LOC642903 | -0.040998685 | 6.126587297 | 0.137629111 |
| RPS16     | -0.070159473 | 14.1664512  | 0.137643089 |
| PHLDA1    | 0.210542352  | 8.876913244 | 0.137652913 |
| SHFM1     | 0.067587048  | 10.92756332 | 0.137678924 |
| EED       | 0.049490994  | 6.631985079 | 0.137679895 |
| CD3E      | 0.035668407  | 6.196407608 | 0.137738616 |
| TAAR8     | 0.050041688  | 6.197808395 | 0.137775381 |
| SCGB1C1   | -0.03382188  | 6.175602273 | 0.137807796 |
| FAM123A   | 0.025787148  | 6.163824994 | 0.137812709 |
| GNG4      | -0.0365162   | 6.013945777 | 0.137820636 |
| STOX1     | -0.026203259 | 6.081750508 | 0.137854976 |
| CDH2      | 0.074186362  | 13.15046374 | 0.137863914 |
| LOC653092 | -0.031924554 | 6.065291005 | 0.137909576 |

## DEG.infomation

|           |              |             |             |
|-----------|--------------|-------------|-------------|
| NT5C1B    | -0.029949194 | 5.955398222 | 0.137920632 |
| DUSP12    | -0.060831901 | 8.265171648 | 0.137929656 |
| KIAA1875  | 0.053114051  | 6.588997594 | 0.137963732 |
| OR11H4    | 0.04040839   | 6.120700303 | 0.138074437 |
| UMOD      | -0.030876097 | 6.081089428 | 0.138099589 |
| SNORD54   | 0.039356759  | 5.982075463 | 0.138152738 |
| ZNF321    | -0.029487222 | 6.120229184 | 0.138242089 |
| CD79B     | -0.069059772 | 7.402919968 | 0.138396248 |
| LOC644799 | 0.125224537  | 9.139130228 | 0.13863336  |
| SCIN      | -0.040875751 | 6.004094559 | 0.138642711 |
| LOC133185 | 0.040683204  | 6.336241062 | 0.138643596 |
| CLEC6A    | 0.046984268  | 5.947618123 | 0.138731101 |
| NUP160    | 0.050786114  | 8.072271949 | 0.138746808 |
| EIF2B1    | 0.060259588  | 8.711729933 | 0.138946489 |
| GLI4      | 0.047451402  | 6.581014073 | 0.138960312 |
| KLRK1     | 0.047538692  | 6.232650688 | 0.139048147 |
| RFPL3S    | -0.027042812 | 6.043106413 | 0.139104162 |
| LRRC41    | -0.06497573  | 7.954109071 | 0.139227162 |
| LOC130678 | 0.035347261  | 6.144197898 | 0.139245163 |
| LOC442316 | -0.036087733 | 5.980966034 | 0.139313808 |
| MCHR1     | 0.049781485  | 6.047348707 | 0.139377247 |
| ARX       | 0.036908174  | 6.214083987 | 0.139413562 |
| LOC387856 | -0.026617975 | 6.233074146 | 0.139470199 |
| SCYL2     | 0.080692377  | 8.690181896 | 0.139542341 |
| USP24     | 0.079735881  | 9.733045014 | 0.139594294 |
| TMEM53    | -0.048734054 | 6.430200101 | 0.139606727 |
| LOC653663 | 0.022724948  | 6.124783151 | 0.139643477 |
| UQCRB     | -0.099278902 | 10.07682896 | 0.139707394 |
| NPAS4     | -0.03947399  | 6.018781426 | 0.139717669 |
| LOC653103 | -0.050215722 | 7.757068366 | 0.139739393 |
| LOC646663 | 0.038931962  | 6.19930574  | 0.139743704 |
| BEST3     | -0.039027037 | 6.094246363 | 0.139798835 |
| LOC652745 | 0.039726728  | 5.977721837 | 0.139909049 |
| TUBGCP2   | -0.07254715  | 8.818686457 | 0.140099048 |
| LOC645126 | 0.034671046  | 6.06291253  | 0.140212083 |
| C15ORF48  | -0.022720013 | 6.014086729 | 0.140242285 |
| APOD      | 0.213107016  | 11.89705196 | 0.140279455 |
| MARCH7    | 0.099043563  | 10.38305007 | 0.140301539 |
| GPR61     | -0.042100287 | 5.981403673 | 0.140321911 |
| PI15      | -0.053994815 | 6.843149852 | 0.140374002 |
| LOC376693 | -0.039365856 | 5.9589771   | 0.140395468 |
| LOC400752 | 0.033229814  | 6.032506159 | 0.140472461 |
| LOC652439 | 0.035993117  | 6.014523778 | 0.140499741 |
| LOC440092 | -0.048178981 | 6.084773903 | 0.14052198  |
| LOC647080 | 0.03775837   | 6.183690524 | 0.140590595 |
| MRPL13    | 0.098204117  | 9.380659505 | 0.140617985 |
| C20ORF38  | 0.03372305   | 6.134441279 | 0.140633619 |
| LOC648133 | 0.03772607   | 6.109276973 | 0.14085687  |
| LOC651829 | -0.04211919  | 5.952268808 | 0.140859206 |
| POU4F2    | -0.037704673 | 5.983900617 | 0.140954209 |
| OLFML2B   | -0.089687493 | 6.469852013 | 0.140974178 |

## DEG.infomation

|           |              |             |             |
|-----------|--------------|-------------|-------------|
| LOC644167 | -0.038847942 | 6.026213492 | 0.141041396 |
| PKP3      | 0.034590809  | 6.096283518 | 0.141064033 |
| DGAT2L6   | 0.038304907  | 5.993291914 | 0.141142612 |
| TMEM45B   | 0.045396137  | 6.113117631 | 0.141161497 |
| CCDC70    | -0.043142282 | 6.105158839 | 0.141174582 |
| TMEM4     | -0.076302022 | 7.904078669 | 0.141223559 |
| LOC646449 | -0.030764817 | 6.105994621 | 0.141226901 |
| ENOSF1    | 0.101158     | 8.002923367 | 0.141249691 |
| SLC39A7   | -0.068896113 | 6.347222639 | 0.141290616 |
| LOC643695 | 0.039696181  | 5.965333907 | 0.141310299 |
| LOC650162 | 0.040658208  | 6.102441974 | 0.141374204 |
| LOC644500 | -0.034310262 | 6.214201299 | 0.141383924 |
| JMJD2B    | -0.034959345 | 6.056460197 | 0.141402379 |
| ZDHC19    | -0.038595731 | 6.071240821 | 0.141503755 |
| LOC645644 | 0.036328959  | 6.18356162  | 0.141535699 |
| LOC649351 | 0.041449416  | 6.182320433 | 0.141549479 |
| LILRA6    | -0.022187603 | 6.101439993 | 0.14156881  |
| LOC650528 | 0.034070704  | 6.139094285 | 0.141601095 |
| TRIMP1    | 0.040913268  | 6.090656293 | 0.141606986 |
| OSTM1     | 0.053412577  | 6.979073473 | 0.14168867  |
| MYO1E     | -0.055920103 | 6.181417517 | 0.14170183  |
| PTCRA     | -0.025996111 | 6.084231111 | 0.141800343 |
| FAM9C     | 0.03241357   | 6.037592415 | 0.141975656 |
| NAT5      | -0.059814119 | 10.28070745 | 0.14200827  |
| C16ORF48  | -0.05722079  | 8.330656627 | 0.14211021  |
| LOC401097 | 0.041655627  | 5.967486548 | 0.142435738 |
| ANKRD30A  | -0.022004269 | 5.947687676 | 0.142513116 |
| GRK1      | -0.036084006 | 6.125285777 | 0.142525039 |
| PRKRA     | -0.101300431 | 10.05157856 | 0.142534836 |
| BATF2     | -0.05493234  | 6.357033577 | 0.142650672 |
| EPB41     | -0.034964612 | 6.032423465 | 0.142740597 |
| LOC643304 | 0.041048496  | 6.291876279 | 0.142745594 |
| KGFLP1    | 0.042600683  | 6.24823124  | 0.142762203 |
| LOC651721 | 0.038164765  | 5.945105254 | 0.142811186 |
| KIAA0226  | -0.055727831 | 6.381270213 | 0.142831098 |
| ZNF650    | -0.085752275 | 8.812596269 | 0.142874328 |
| NOD3      | 0.034457913  | 6.142098313 | 0.14287687  |
| THEM5     | 0.037827063  | 6.107135873 | 0.142891533 |
| CNGA3     | 0.020503081  | 6.112334942 | 0.142926919 |
| PLAGL2    | 0.059272016  | 7.441166043 | 0.142997236 |
| PAQR8     | 0.063976124  | 7.172134378 | 0.143177516 |
| LOC647041 | -0.032938564 | 6.336490703 | 0.143240478 |
| LOC440356 | 0.03542124   | 6.07306106  | 0.143360996 |
| ROBO1     | 0.027348878  | 6.218316038 | 0.143392625 |
| TRIM6     | 0.04206292   | 6.313993183 | 0.143417143 |
| F10       | 0.073628503  | 6.66340555  | 0.143509789 |
| ZNF571    | 0.029023499  | 6.18265389  | 0.1435415   |
| LOC654118 | 0.032360649  | 6.105228509 | 0.143720464 |
| PTPLAD2   | -0.127778095 | 8.960716265 | 0.143759807 |
| TPRX1     | -0.042428712 | 5.980145086 | 0.143827699 |
| TH        | 0.026495261  | 6.013411528 | 0.14385121  |

## DEG.infomation

|              |              |             |             |
|--------------|--------------|-------------|-------------|
| LOC731158    | 0.039896674  | 5.991383647 | 0.143920369 |
| EVX1         | -0.052705775 | 6.039734129 | 0.143939248 |
| LOC642447    | 0.036012495  | 6.217426092 | 0.144003002 |
| LOC440233    | -0.035395729 | 5.947899716 | 0.144019743 |
| LOC388946    | -0.029384375 | 6.048981069 | 0.144091314 |
| PEX11A       | 0.06625528   | 6.70171041  | 0.144215831 |
| LOC440509    | 0.045203803  | 6.640066164 | 0.144256166 |
| DPEP2        | 0.055484324  | 6.337473067 | 0.144261634 |
| CHRNA4       | 0.039543521  | 6.17540446  | 0.144319711 |
| LOC643854    | 0.030826268  | 6.118170657 | 0.144320263 |
| OR5K3        | -0.026126965 | 6.009222238 | 0.144380903 |
| CHRM5        | 0.036684636  | 5.98620343  | 0.144392037 |
| LOC651905    | -0.037453676 | 6.037872843 | 0.144437353 |
| LOC643154    | -0.034073468 | 6.074687083 | 0.144451218 |
| USP39        | -0.054588007 | 8.668884822 | 0.144483319 |
| HJURP        | -0.039767846 | 6.129085655 | 0.144527426 |
| PWP1         | -0.058783818 | 8.581205831 | 0.144557136 |
| FRMPD1       | 0.042734325  | 6.339248634 | 0.144646841 |
| MYLK2        | -0.043614038 | 6.170053154 | 0.144866349 |
| FLJ38379     | -0.021316047 | 5.955118588 | 0.144876389 |
| STAG1        | -0.057252025 | 7.733352368 | 0.14493037  |
| SNX6         | -0.051762643 | 7.792840958 | 0.144934333 |
| IL28B        | 0.104510707  | 9.946185608 | 0.145088528 |
| ETV2         | 0.072523087  | 6.117528    | 0.145100177 |
| C14ORF37     | -0.065934627 | 6.644573737 | 0.145112129 |
| BHLHB8       | 0.040326116  | 6.106957144 | 0.145173122 |
| PTPRF        | -0.049298098 | 6.767371637 | 0.145173435 |
| NLK          | 0.100298503  | 7.471209848 | 0.14522508  |
| CILP         | 0.175489985  | 8.671228563 | 0.145247274 |
| LOC650148    | 0.03779875   | 6.025265608 | 0.145435662 |
| BIRC2        | -0.058455756 | 8.775247764 | 0.145436735 |
| CHMP4C       | 0.074536522  | 6.379059179 | 0.145477704 |
| LOC641801    | 0.037760734  | 6.110857384 | 0.14554949  |
| C18ORF19     | 0.105783032  | 7.834474772 | 0.145572656 |
| LOC730818    | 0.033218839  | 6.112264605 | 0.145594977 |
| CAMK4        | -0.029949097 | 5.952082754 | 0.145624425 |
| DKFZP434N035 | -0.027979962 | 6.082314906 | 0.145724052 |
| TEX11        | 0.026188792  | 6.027795068 | 0.145736401 |
| CEACAM16     | -0.032202083 | 6.092024282 | 0.145755473 |
| LOC643869    | 0.038739994  | 5.987631547 | 0.14578818  |
| FAM173A      | 0.07118315   | 8.503237645 | 0.145827453 |
| LOC643256    | -0.036180178 | 6.219251846 | 0.145849542 |
| LOC644992    | 0.030789958  | 6.092355812 | 0.145908896 |
| ARL17P1      | 0.097121742  | 6.945412037 | 0.145913682 |
| SMPDL3B      | 0.024011722  | 6.005418657 | 0.145915632 |
| TXNDC17      | -0.073851327 | 10.90277132 | 0.145986279 |
| TRIM69       | 0.039159146  | 6.372633116 | 0.146130545 |
| ZNF98        | 0.034901745  | 6.201559951 | 0.14614459  |
| TNFAIP8L1    | 0.104483532  | 7.236815519 | 0.146208836 |
| SLC35D3      | -0.039638509 | 5.996567586 | 0.14623157  |
| CACNA1C      | 0.09113733   | 7.86414914  | 0.146255616 |



## DEG.infomation

|           |              |             |             |
|-----------|--------------|-------------|-------------|
| C3ORF57   | 0.028193501  | 5.958312403 | 0.146294573 |
| LSM14B    | 0.046705715  | 6.682533381 | 0.146294743 |
| C19ORF70  | 0.057966398  | 11.89688226 | 0.146331063 |
| HNRNPA0   | -0.082990009 | 9.698838123 | 0.14634838  |
| C1ORF114  | -0.051776872 | 5.990435803 | 0.146471401 |
| LOC652784 | 0.04473319   | 5.984164044 | 0.146503408 |
| OR6V1     | 0.037791806  | 6.315721432 | 0.146511541 |
| OBP2B     | -0.036194999 | 5.888544332 | 0.146680967 |
| NCF1C     | -0.054883784 | 6.476522856 | 0.146773511 |
| LOC644763 | -0.038111758 | 6.277773351 | 0.146808371 |
| SERPINA10 | 0.045369803  | 5.995541154 | 0.146829843 |
| SOS1      | -0.050089305 | 6.610282853 | 0.146832327 |
| NMUR2     | -0.037339505 | 5.939583222 | 0.146865786 |
| LOC649037 | 0.038345965  | 5.86067068  | 0.146895967 |
| GCSH      | 0.059630997  | 6.992688459 | 0.146943362 |
| LOC650812 | 0.041565015  | 5.921515169 | 0.146981109 |
| COL2A1    | 0.034443941  | 6.134414767 | 0.147060995 |
| RGL4      | -0.039126583 | 6.237366162 | 0.147120677 |
| LOC650708 | 0.034426167  | 6.223640199 | 0.147160105 |
| PWWP2A    | 0.045398624  | 6.783577796 | 0.147222052 |
| LOC642712 | 0.03811698   | 6.291328497 | 0.147258059 |
| DLK1      | -0.275104274 | 8.114182434 | 0.147303468 |
| LOC201164 | -0.080674893 | 6.823265569 | 0.147306924 |
| PDAP1     | 0.056773246  | 6.027876916 | 0.147349391 |
| CCBP2     | 0.058200771  | 6.303008132 | 0.147391651 |
| PBX4      | -0.040022643 | 6.11486126  | 0.147413948 |
| MGC5457   | -0.102594043 | 6.836902908 | 0.147515468 |
| GLCCI1    | 0.042000117  | 6.542222159 | 0.147575913 |
| OR5111    | 0.034871112  | 6.084451595 | 0.14781297  |
| C8ORF49   | 0.049872266  | 6.480312514 | 0.147836062 |
| NAT13     | -0.089143646 | 7.188395052 | 0.147901268 |
| HADHA     | -0.095948895 | 9.860276829 | 0.147927496 |
| LOC645262 | -0.032162716 | 6.083735223 | 0.147938662 |
| CYS1      | 0.025262415  | 6.069928501 | 0.147947078 |
| XKRY      | 0.038539169  | 5.969219932 | 0.147987547 |
| SNIP1     | 0.07162083   | 7.310798445 | 0.148076057 |
| CFP       | -0.04204267  | 6.149388028 | 0.148090465 |
| PCP4      | -0.062200032 | 6.594142745 | 0.148133042 |
| LOC651192 | 0.036888954  | 6.023185776 | 0.148140748 |
| OR9I1     | 0.040047849  | 6.200189956 | 0.148215735 |
| C2ORF25   | 0.082742497  | 10.54761595 | 0.148291523 |
| LOC646388 | 0.033617282  | 5.967546516 | 0.148335522 |
| C11ORF41  | 0.02936611   | 6.07199361  | 0.148361716 |
| ZFHX4     | -0.040893702 | 5.950612047 | 0.148380373 |
| EIF3M     | -0.068650576 | 9.796382373 | 0.148382594 |
| LOC650428 | 0.034987613  | 6.139952008 | 0.148434553 |
| TXNL1     | 0.119980294  | 7.707571715 | 0.148488773 |
| LOC652883 | -0.039361227 | 6.209913212 | 0.148532079 |
| LOC647520 | 0.038694438  | 6.36200597  | 0.148588168 |
| LOC643147 | -0.03567209  | 5.970646099 | 0.148619348 |
| PCDHB3    | -0.029856957 | 6.200096713 | 0.148663792 |

## DEG.infomation

|           |              |             |             |
|-----------|--------------|-------------|-------------|
| LOC285900 | -0.076116823 | 10.92133266 | 0.148671524 |
| FAM134C   | -0.075608273 | 6.148330762 | 0.148747121 |
| RET       | -0.031042179 | 6.204797026 | 0.148778434 |
| LOC644974 | 0.033275767  | 5.995478123 | 0.148817943 |
| CEP55     | -0.044387022 | 6.300809718 | 0.148927634 |
| TTPA      | 0.026204948  | 5.892290004 | 0.148975604 |
| KLB       | -0.040482009 | 6.246998711 | 0.149011012 |
| PCDHGC3   | -0.023381745 | 6.250358414 | 0.149022356 |
| LOC650274 | -0.028312579 | 6.019500189 | 0.149190543 |
| FLJ12993  | -0.031829925 | 6.258334988 | 0.149191627 |
| LOC646256 | 0.036959915  | 6.051255474 | 0.149241448 |
| FBLIM1    | -0.037644054 | 6.337414226 | 0.149242819 |
| ECEL1     | 0.033460142  | 6.104198037 | 0.14925611  |
| LOC390349 | -0.041573212 | 5.948611185 | 0.149273898 |
| LOC647037 | 0.072727374  | 7.927116589 | 0.149304303 |
| NBPF12    | 0.044796782  | 6.146176789 | 0.149342049 |
| LOC649385 | 0.037570541  | 6.076233725 | 0.149369291 |
| FAM18B    | -0.059005946 | 7.628220568 | 0.149412136 |
| CST9L     | -0.03628549  | 5.91886188  | 0.149426781 |
| TPX2      | -0.041321671 | 6.08194233  | 0.149484571 |
| LOC650985 | 0.031421154  | 6.104587179 | 0.149632758 |
| ZNF565    | 0.028326816  | 6.76857537  | 0.149634219 |
| GLS       | -0.069780573 | 8.34185886  | 0.149673027 |
| LOC730196 | 0.03607826   | 6.041638816 | 0.149692995 |
| CNTN3     | 0.054490622  | 6.242045347 | 0.149759147 |
| LOC643416 | 0.038210119  | 5.896098295 | 0.149790073 |
| LOC646625 | -0.036621908 | 5.915069114 | 0.149839778 |
| LOC730243 | 0.04866856   | 6.158001107 | 0.149932224 |
| IKZF4     | 0.052310375  | 7.524659217 | 0.149938553 |
| CHST2     | -0.065915278 | 6.158778482 | 0.149945965 |
| BNIP2     | 0.06270806   | 9.170325329 | 0.150041233 |
| LOC642419 | -0.039647775 | 6.122924511 | 0.150059019 |
| C9ORF156  | 0.06082874   | 7.54817818  | 0.150091861 |
| BAGE2     | -0.040803309 | 6.057283253 | 0.150245542 |
| B4GALT2   | 0.033584281  | 6.183264375 | 0.150340595 |
| CCL28     | 0.02126806   | 6.122487508 | 0.15036786  |
| TARDBP    | -0.050297237 | 6.704910746 | 0.150387485 |
| GTF2H3    | 0.060487984  | 6.904856559 | 0.150575746 |
| PRRC1     | -0.069789043 | 8.131916887 | 0.150619665 |
| OR4D2     | -0.026015803 | 6.088277699 | 0.150666079 |
| NFYB      | 0.050326366  | 6.87520818  | 0.150712956 |
| KIF5A     | 0.032255051  | 6.118967991 | 0.150773597 |
| LOC644450 | 0.033399103  | 6.19609539  | 0.150815469 |
| FLJ36157  | -0.034950616 | 6.03000478  | 0.15081982  |
| LOC399898 | 0.042383041  | 6.041458552 | 0.15089517  |
| FBXO15    | 0.041082126  | 6.297597598 | 0.150942375 |
| SNIP      | -0.042854215 | 5.919194872 | 0.15101089  |
| LOC146325 | -0.044883065 | 5.961089697 | 0.151072864 |
| KRTHB6    | 0.055446979  | 5.923310292 | 0.151155509 |
| SESN3     | 0.035967941  | 6.188658169 | 0.151164667 |
| FAM168B   | 0.106670224  | 7.724550022 | 0.151236885 |

## DEG.infomation

|           |              |             |             |
|-----------|--------------|-------------|-------------|
| AVPR1B    | 0.051954699  | 5.965902232 | 0.151254239 |
| LOC652435 | 0.033089573  | 5.989938385 | 0.151275793 |
| CEP110    | 0.041209113  | 6.584953008 | 0.151389821 |
| LOC441031 | 0.035987501  | 6.025895335 | 0.151391111 |
| POLD1     | -0.053974719 | 6.684823254 | 0.15141384  |
| SLC9A10   | 0.073124641  | 6.733509244 | 0.151499884 |
| ABCB9     | -0.05988373  | 6.896034726 | 0.15150624  |
| LOC653674 | 0.042424665  | 5.884902948 | 0.151610135 |
| LOC727791 | -0.035395544 | 6.086118365 | 0.151673257 |
| R3HDM1    | 0.045418117  | 6.762809749 | 0.151673857 |
| ZNRF2     | 0.044862817  | 6.2442816   | 0.151737023 |
| C9ORF131  | 0.031372979  | 6.168339835 | 0.151747848 |
| LOC644204 | -0.035812591 | 6.074075592 | 0.151774788 |
| KIAA2022  | 0.039048589  | 5.951234081 | 0.151815696 |
| LOC650684 | -0.037944118 | 5.931594312 | 0.151936551 |
| IPF1      | 0.038538506  | 6.108899479 | 0.151937466 |
| LOC644808 | -0.037168054 | 5.945234323 | 0.151983722 |
| LOC641941 | 0.03671871   | 6.23686084  | 0.152082008 |
| SH2D6     | -0.034331048 | 5.983228008 | 0.152085399 |
| RTN4RL1   | -0.056763106 | 6.213132356 | 0.152113361 |
| PAM       | 0.062980685  | 13.56855397 | 0.15217231  |
| LOC645454 | -0.040413264 | 5.859530376 | 0.15222491  |
| KBTBD8    | -0.092070451 | 7.346663193 | 0.152265853 |
| OR6K2     | 0.032716294  | 5.977307051 | 0.15230096  |
| NFS1      | 0.033398526  | 6.626847358 | 0.152450725 |
| GAD2      | -0.035041797 | 6.097346272 | 0.152465744 |
| DNAJC22   | 0.039177271  | 6.158821346 | 0.152615447 |
| SSX2IP    | -0.053919704 | 6.652658435 | 0.152662314 |
| CCL15     | -0.048256347 | 6.382148781 | 0.152683851 |
| NOTO      | -0.037215164 | 6.131713308 | 0.152755244 |
| ABCC1     | -0.033265744 | 6.255614819 | 0.152766327 |
| OR7A17    | 0.047833716  | 6.06208666  | 0.15278294  |
| LOC642788 | 0.040141231  | 6.320398497 | 0.152835852 |
| LOC388199 | 0.039575087  | 5.933990168 | 0.152856886 |
| SQSTM1    | 0.170930026  | 10.94630066 | 0.152866766 |
| CHST12    | -0.063144332 | 7.758873349 | 0.152906446 |
| INS       | 0.03740742   | 6.202073834 | 0.152919173 |
| HNRPA1P4  | 0.113299716  | 9.75254535  | 0.152927963 |
| PCDHGB6   | 0.045774643  | 6.85652337  | 0.152952713 |
| TTY20     | 0.036277264  | 6.000147912 | 0.153055124 |
| LOC647819 | 0.032475793  | 5.949328849 | 0.153155995 |
| KLF11     | 0.083404481  | 8.602719221 | 0.153224261 |
| UGT2B4    | -0.153112359 | 6.805553613 | 0.153261388 |
| DHH       | -0.045137311 | 6.126443346 | 0.153274585 |
| LOC648226 | -0.037637357 | 6.121056038 | 0.153329134 |
| NUDT22    | 0.06381031   | 8.372089472 | 0.153384406 |
| KIAA0692  | -0.015002476 | 6.041107428 | 0.153431099 |
| GNRH2     | -0.024397622 | 6.013728217 | 0.153450622 |
| SPACA4    | 0.038582955  | 6.156390736 | 0.153477242 |
| RAD23A    | -0.067335511 | 10.28429773 | 0.15352938  |
| C6ORF138  | 0.042883414  | 6.556424741 | 0.153565277 |

## DEG.infomation

|           |              |             |             |
|-----------|--------------|-------------|-------------|
| WIF1      | 0.054904555  | 6.076077422 | 0.153708323 |
| LMAN2     | -0.126034329 | 6.618892002 | 0.15388452  |
| LOC390231 | -0.045995803 | 5.985615972 | 0.153910332 |
| MAOA      | 0.116872713  | 11.2274091  | 0.153924539 |
| PAQR7     | -0.049781923 | 6.463751708 | 0.15397502  |
| LOC645971 | -0.032894437 | 5.904622859 | 0.154049972 |
| GGA3      | -0.03427363  | 6.757346064 | 0.154067229 |
| FGF17     | 0.036788706  | 6.081614612 | 0.154130595 |
| LOC402538 | -0.037887016 | 6.064882781 | 0.154148339 |
| SAP30     | -0.116429583 | 9.014141764 | 0.154150525 |
| XRCC6     | -0.053592854 | 10.13306326 | 0.154194353 |
| ST6GAL2   | 0.034958219  | 6.003975707 | 0.154237614 |
| DNAJC1    | -0.04961304  | 6.400562816 | 0.154257073 |
| LOC647785 | -0.03741439  | 5.976894246 | 0.15430838  |
| MMP1      | -0.04001117  | 6.113693175 | 0.154360682 |
| LGALS3    | -0.156134081 | 9.394408777 | 0.154385403 |
| CYP8B1    | -0.035772489 | 6.018734077 | 0.154441195 |
| ZSCAN16   | 0.041489438  | 6.981050956 | 0.154449273 |
| GZF1      | 0.043236467  | 6.574294443 | 0.15463806  |
| LOC442206 | -0.0305779   | 5.914861047 | 0.154645993 |
| KIAA0773  | 0.028394936  | 6.07566546  | 0.154655787 |
| C9ORF93   | 0.024205261  | 6.171869265 | 0.154722671 |
| EIF2AK3   | -0.069938436 | 6.562051503 | 0.154740586 |
| PCSK7     | -0.087772891 | 8.429938999 | 0.154808372 |
| POLR3K    | 0.057082807  | 7.65710004  | 0.154826276 |
| ZBTB37    | 0.039199634  | 5.938582645 | 0.154830689 |
| ADAM6     | 0.028961706  | 6.115123005 | 0.154971207 |
| DUSP22    | 0.052090769  | 9.326151401 | 0.154981234 |
| GTF3C6    | 0.078424767  | 8.850256383 | 0.155051754 |
| SEC14L3   | -0.037421328 | 6.033787565 | 0.155075358 |
| AFAP1     | 0.045394115  | 6.61417673  | 0.155187584 |
| ERGIC1    | 0.081994827  | 7.335178105 | 0.155219795 |
| LOC402217 | -0.036157934 | 6.032453706 | 0.155248702 |
| ADAMTSL2  | 0.117794318  | 8.164955389 | 0.155273363 |
| BRDG1     | -0.03461977  | 5.894256346 | 0.155291407 |
| ATP2B2    | 0.01715291   | 5.994722286 | 0.155393577 |
| BIRC8     | -0.032633608 | 6.064896137 | 0.155448534 |
| LOC647044 | 0.042614066  | 6.22237259  | 0.155486877 |
| CDC2L2    | -0.082486029 | 6.802633117 | 0.155576812 |
| RERE      | -0.073918318 | 9.256795666 | 0.155582113 |
| COMMD2    | -0.081362355 | 7.736569464 | 0.155610501 |
| AMFR      | -0.086218129 | 7.992776442 | 0.155640595 |
| C20ORF173 | 0.035749064  | 6.06190511  | 0.155648735 |
| SLC9A8    | 0.055069898  | 6.964421933 | 0.155687207 |
| DRD1IP    | 0.0384726    | 6.040802853 | 0.15569612  |
| ADM       | 0.163437728  | 10.07829621 | 0.155741222 |
| TRIM64    | -0.038344633 | 6.123618161 | 0.155770514 |
| LOC642187 | -0.04173681  | 5.991856275 | 0.15580564  |
| LOC654165 | 0.037710187  | 6.063887424 | 0.15581653  |
| ST8SIA1   | -0.031203669 | 6.137975066 | 0.155820218 |
| TH1L      | -0.051488418 | 8.874163674 | 0.155859444 |

## DEG.infomation

|            |              |             |             |
|------------|--------------|-------------|-------------|
| TAS2R43    | 0.036144081  | 6.223080063 | 0.155950816 |
| PRNT       | 0.039004239  | 5.955081877 | 0.156027135 |
| C14ORF68   | -0.03660045  | 6.056922806 | 0.156092085 |
| LOC132241  | -0.068168416 | 7.328115054 | 0.156103871 |
| LOC729008  | -0.063397866 | 6.46431261  | 0.156164338 |
| LOC643814  | -0.040066478 | 5.997448149 | 0.156167303 |
| SERINC5    | 0.037096653  | 5.971661484 | 0.156215515 |
| LOC347487  | -0.036340827 | 5.928457221 | 0.156263112 |
| RAB3C      | -0.037236709 | 6.04517198  | 0.156328509 |
| LOC283710  | -0.032977699 | 6.159265269 | 0.156400934 |
| FBXO7      | -0.039046276 | 7.40914484  | 0.15647462  |
| FLJ43276   | -0.03421392  | 6.025088248 | 0.156482033 |
| HIST2H2BE  | 0.115993711  | 10.01629437 | 0.156529599 |
| KRTAP10-10 | 0.025253244  | 6.245793428 | 0.156535593 |
| KLRA1      | 0.034352504  | 6.140767648 | 0.156545709 |
| MAML2      | 0.030368221  | 6.149322571 | 0.156581462 |
| INCENP     | -0.026433882 | 6.199002528 | 0.156612518 |
| ACRBP      | -0.04101171  | 6.07823566  | 0.156634441 |
| FLJ40712   | -0.035942838 | 6.211659741 | 0.156684311 |
| IRX1       | -0.068780647 | 6.769507126 | 0.156716682 |
| LOC648223  | 0.037389192  | 6.268091281 | 0.156722904 |
| C16ORF50   | -0.025913454 | 6.003116441 | 0.156742942 |
| FTHL2      | -0.113482155 | 9.164410748 | 0.156763891 |
| CES3       | -0.027812717 | 6.049169417 | 0.156812736 |
| LOC165186  | 0.047298583  | 6.125681932 | 0.156837133 |
| CDH16      | -0.039022549 | 6.196506009 | 0.156866957 |
| LOC388532  | -0.111736093 | 11.7086797  | 0.156920903 |
| MAGEA2B    | -0.041485748 | 6.044209895 | 0.156959555 |
| SOS2       | 0.055049037  | 6.744468045 | 0.156993548 |
| SPACA5     | 0.03330348   | 6.038120251 | 0.157015525 |
| SNORD32A   | -0.035333154 | 6.211780981 | 0.157044312 |
| LOC647254  | 0.034942301  | 5.943478021 | 0.157044726 |
| LOC646615  | 0.036863546  | 6.136459013 | 0.157052688 |
| LOC643621  | 0.032431286  | 6.107895827 | 0.157092023 |
| LOC441212  | 0.032707365  | 6.107950214 | 0.157139624 |
| LOC652764  | -0.041174862 | 6.133142325 | 0.157147286 |
| TMEM213    | -0.041344481 | 5.943852846 | 0.157182773 |
| EFNA5      | 0.04435245   | 6.284294456 | 0.157214902 |
| ACTL6A     | -0.0493085   | 8.534053781 | 0.157272329 |
| SPSB1      | -0.069250169 | 6.982416394 | 0.15732701  |
| MGC26718   | 0.037224764  | 6.033900383 | 0.157447693 |
| TMEM195    | 0.035083864  | 6.173370696 | 0.157459128 |
| LOC644313  | 0.034025299  | 6.191896954 | 0.157499589 |
| PRRT2      | 0.078065938  | 6.909106857 | 0.15765041  |
| LOC399978  | 0.036380571  | 6.012230285 | 0.157655575 |
| LOC648829  | 0.030352109  | 6.036780557 | 0.157659821 |
| OR1C1      | 0.037383599  | 6.080590454 | 0.157690041 |
| C1ORF124   | -0.03028894  | 6.601762217 | 0.157746448 |
| LOC649389  | 0.034327012  | 6.136407732 | 0.157765455 |
| HHCM       | 0.036122279  | 6.010980538 | 0.157838891 |
| LOC652526  | 0.036536515  | 6.032449079 | 0.15784077  |

## DEG.infomation

|           |              |             |             |
|-----------|--------------|-------------|-------------|
| KRT74     | 0.046524864  | 5.955788425 | 0.157967987 |
| LOC390414 | 0.048176214  | 6.21031816  | 0.158160886 |
| PRELID2   | -0.028662044 | 6.04909836  | 0.158172116 |
| SDF2      | -0.054743832 | 9.268388941 | 0.158298732 |
| LOC728636 | 0.035598188  | 6.043841997 | 0.158350563 |
| FLJ41821  | 0.033885678  | 5.988724756 | 0.158393099 |
| PLCH2     | -0.04193692  | 6.559349764 | 0.158486614 |
| SAMD11    | 0.029524592  | 6.377361639 | 0.158600739 |
| CRYBB1    | -0.034581581 | 6.060093033 | 0.158696985 |
| MXRA8     | 0.044835581  | 6.422525971 | 0.158741452 |
| PET112L   | 0.122506648  | 9.590369674 | 0.158757493 |
| C16ORF74  | 0.038915488  | 6.095151386 | 0.158834067 |
| SPTLC2    | -0.037612326 | 6.813715943 | 0.158884802 |
| IBTK      | 0.106835588  | 9.6429251   | 0.158969883 |
| CBWD1     | 0.022090027  | 6.046097168 | 0.158971666 |
| LOC642245 | 0.04057737   | 5.869701541 | 0.158980411 |
| SOX2      | -0.028038088 | 6.045743907 | 0.159024573 |
| NGRN      | -0.064091719 | 11.50807869 | 0.159218222 |
| PLK1      | 0.05242221   | 6.948881118 | 0.159271457 |
| LOC648987 | -0.050832012 | 5.97086741  | 0.159345184 |
| ZDHC1     | 0.052473126  | 7.311751945 | 0.159453986 |
| CDKL4     | -0.035708594 | 6.115445485 | 0.159586322 |
| LOC644602 | 0.038308531  | 6.095508925 | 0.159594397 |
| PRDM8     | -0.056002268 | 6.835659068 | 0.159612475 |
| ABC10     | 0.072076808  | 7.587687973 | 0.159781592 |
| LOC643475 | 0.024033232  | 6.083356598 | 0.15980082  |
| LOC652640 | -0.0376925   | 6.265437748 | 0.159831352 |
| TCTEX1D4  | 0.027933099  | 6.068237427 | 0.159840184 |
| KIR2DL3   | -0.02610092  | 6.044739685 | 0.159853547 |
| CIRBP     | -0.094102486 | 11.76029198 | 0.159919848 |
| GRM3      | 0.033376209  | 6.068505994 | 0.159963598 |
| PROL1     | 0.031763355  | 5.982941964 | 0.160102281 |
| OR5H15    | 0.036522701  | 5.955803945 | 0.160176117 |
| ARMC6     | -0.046671592 | 6.853759534 | 0.160179138 |
| LOC643060 | 0.034718638  | 5.965806693 | 0.160326808 |
| TMPRSS3   | 0.020351185  | 6.126870227 | 0.160348901 |
| LOC643161 | 0.037951224  | 5.992374848 | 0.160386247 |
| TMCC2     | 0.042860177  | 6.078015671 | 0.160402089 |
| PAQR3     | 0.067372327  | 7.345915021 | 0.160431815 |
| ZNF214    | 0.030103469  | 6.140081336 | 0.160501813 |
| LOC339746 | 0.030852588  | 5.980732924 | 0.160509946 |
| POLRMT    | -0.065431727 | 8.292399021 | 0.160628929 |
| TIMM50    | -0.036630003 | 5.96118284  | 0.160629692 |
| LOC641704 | -0.037201063 | 5.966249461 | 0.160670721 |
| HADHB     | -0.098761004 | 11.04047103 | 0.160734283 |
| LOC442597 | -0.034811162 | 6.238019021 | 0.160754141 |
| OTOP3     | -0.036759615 | 6.103670214 | 0.160774335 |
| LOC645089 | 0.034361682  | 5.964285194 | 0.160872472 |
| RANBP3L   | 0.028475008  | 6.099238289 | 0.160893298 |
| RHCG      | 0.04296179   | 6.150406935 | 0.160903327 |
| C2ORF67   | 0.040271714  | 6.216479979 | 0.160995148 |

## DEG.infomation

|           |              |             |             |
|-----------|--------------|-------------|-------------|
| AKT1      | 0.058629102  | 10.13828356 | 0.161051285 |
| BICD1     | 0.028312453  | 6.19768562  | 0.161157837 |
| ATP6V1E2  | 0.04936898   | 6.710525808 | 0.161185055 |
| MCHR2     | -0.035972842 | 6.217057968 | 0.161228042 |
| LOC646097 | 0.032107796  | 6.083231714 | 0.161238687 |
| RIT2      | -0.036006571 | 5.899344089 | 0.161287248 |
| LOC644005 | -0.038841228 | 5.913584268 | 0.161300857 |
| IRF1      | -0.128217259 | 8.434941948 | 0.161326522 |
| DIMT1L    | -0.064075043 | 10.1313725  | 0.161397605 |
| ODZ2      | -0.034283113 | 6.282031529 | 0.161489643 |
| CGB8      | -0.033460812 | 6.162338355 | 0.161568384 |
| SORCS2    | 0.047389604  | 6.161984303 | 0.161604427 |
| LOC647673 | 0.145050568  | 9.484404758 | 0.161634508 |
| C1ORF137  | 0.036317904  | 6.155146608 | 0.161674255 |
| DNMT3A    | -0.021881961 | 6.14790945  | 0.161714762 |
| LOC646100 | -0.048676289 | 6.352304222 | 0.161827382 |
| LOC653841 | 0.030438713  | 6.068912007 | 0.161889883 |
| KIAA0408  | -0.06976493  | 6.780445265 | 0.161911681 |
| TBCEL     | -0.059323989 | 6.036110946 | 0.161945734 |
| KIAA0907  | 0.062489996  | 8.590172032 | 0.161948984 |
| LOC651603 | -0.030899285 | 5.917271684 | 0.162010709 |
| TIGD6     | 0.035044279  | 6.476106133 | 0.162162323 |
| OR4K2     | 0.025791192  | 6.055754079 | 0.162235652 |
| LOC649667 | -0.033951354 | 5.953229572 | 0.162289823 |
| ANKRD16   | 0.034858004  | 6.541941541 | 0.162348299 |
| HAS1      | -0.039723128 | 6.005121882 | 0.162354034 |
| MEX3C     | -0.0879621   | 7.721792511 | 0.162472974 |
| LOC203510 | -0.032345699 | 6.086781007 | 0.162483415 |
| LOC647468 | -0.034230579 | 5.97555735  | 0.162505846 |
| DOHH      | -0.069176425 | 6.540239202 | 0.162606244 |
| DUSP21    | -0.036781673 | 6.004277214 | 0.162640763 |
| NR6A1     | 0.02812381   | 6.114021776 | 0.162688734 |
| LOC645254 | -0.033342732 | 6.051775088 | 0.162690731 |
| RAB11FIP2 | 0.04367817   | 7.984694836 | 0.162805893 |
| DNASE2B   | 0.022885805  | 6.06019894  | 0.162810779 |
| C8ORF16   | 0.043742642  | 6.248672922 | 0.162858628 |
| LOC642003 | 0.036700724  | 6.265378617 | 0.162890209 |
| C5ORF24   | 0.050201071  | 6.841077466 | 0.162901749 |
| LOC730109 | -0.023815003 | 6.102103896 | 0.162910448 |
| ARHGAP18  | -0.054274702 | 6.323849289 | 0.16296596  |
| CNP       | 0.035079986  | 6.190645149 | 0.163013129 |
| LOC644669 | 0.033204422  | 5.989197187 | 0.16305125  |
| WDR7      | 0.037244556  | 7.347514632 | 0.163110743 |
| C10ORF2   | -0.068006987 | 6.691998535 | 0.163125301 |
| SSX9      | -0.028082053 | 6.147032794 | 0.163202708 |
| TMEM86B   | -0.03892681  | 6.475388829 | 0.163328612 |
| IFI44L    | 0.160870901  | 8.215260072 | 0.163342831 |
| LOC730347 | -0.01773065  | 6.046324179 | 0.163345167 |
| DLG5      | 0.044634161  | 6.196071178 | 0.163385409 |
| RHBDD3    | 0.081400861  | 6.718149613 | 0.163457039 |
| RNF169    | 0.043650007  | 6.352446613 | 0.163540747 |

## DEG.infomation

|           |              |             |             |
|-----------|--------------|-------------|-------------|
| KCNB2     | 0.036431857  | 6.046411318 | 0.163607966 |
| SOCS5     | 0.034797415  | 6.522107405 | 0.163660783 |
| FAT2      | 0.037229053  | 5.909114508 | 0.16367025  |
| EPRS      | 0.065251865  | 10.17208732 | 0.163676083 |
| JOSD2     | -0.071658861 | 6.82401429  | 0.16374031  |
| LOC652664 | -0.034824858 | 5.979401931 | 0.163886947 |
| BPIL3     | -0.035074907 | 5.972735484 | 0.163963674 |
| TAL2      | 0.052581427  | 6.121256931 | 0.163989176 |
| C15ORF32  | -0.034914037 | 5.930141256 | 0.16402965  |
| ASNA1     | 0.046615787  | 6.127348676 | 0.164035117 |
| IL1F8     | -0.021715162 | 6.026215064 | 0.164053827 |
| STARD4    | 0.045523707  | 5.986165177 | 0.164070032 |
| ITGBL1    | 0.053728314  | 6.278449667 | 0.164088117 |
| RBM10     | -0.048680053 | 9.352387708 | 0.164149601 |
| SPDEF     | -0.033904001 | 6.024198465 | 0.164162598 |
| GABRB2    | -0.025897472 | 5.968877272 | 0.164174994 |
| H2BFM     | -0.03837468  | 6.287861821 | 0.164183543 |
| SERGEF    | 0.072755739  | 7.860446267 | 0.164212219 |
| C1ORF116  | -0.042672525 | 6.345641259 | 0.164237775 |
| SNHG8     | 0.040236019  | 6.364877278 | 0.16425303  |
| RESP18    | -0.035483071 | 6.030331732 | 0.164256558 |
| CCDC96    | 0.034610138  | 6.32528198  | 0.164397265 |
| LOC646155 | -0.040259596 | 6.027705396 | 0.164434039 |
| NR2F2     | -0.063574742 | 7.549726033 | 0.164462294 |
| C12ORF41  | 0.050816209  | 9.499363657 | 0.164564239 |
| PDE12     | -0.054607331 | 7.154763684 | 0.164720317 |
| SERPINB3  | -0.023327723 | 5.924338698 | 0.164813799 |
| SIPA1L1   | 0.054076537  | 6.431173919 | 0.164862792 |
| CCDC50    | -0.067109555 | 8.518634204 | 0.164878431 |
| TTC16     | -0.040758565 | 6.816081996 | 0.165006008 |
| TMEM41A   | -0.082315881 | 6.950189813 | 0.165060956 |
| DHFR      | 0.039577566  | 6.117438084 | 0.165067896 |
| PMFBP1    | -0.037417195 | 6.06759844  | 0.165088693 |
| MEG3      | -0.120581182 | 8.210940932 | 0.165109543 |
| TAS1R1    | 0.024541738  | 6.013082357 | 0.165114639 |
| ZIC1      | -0.044242689 | 5.974862498 | 0.165136384 |
| HTRA2     | -0.051848616 | 7.320670669 | 0.165186279 |
| HAR1A     | 0.035948092  | 6.102709012 | 0.165245686 |
| TMEM95    | -0.037436566 | 5.95370582  | 0.165269082 |
| LOC652523 | -0.033891178 | 6.053392969 | 0.165270574 |
| C17ORF97  | 0.132623276  | 7.603507002 | 0.165336285 |
| NPM1      | -0.037459326 | 6.149528242 | 0.165448025 |
| COMT      | -0.070220354 | 9.651366941 | 0.165483935 |
| ARSI      | 0.036446424  | 6.003743498 | 0.165497244 |
| CYP11B2   | 0.041489041  | 6.112542431 | 0.165520293 |
| LOC389523 | 0.049913418  | 6.239226849 | 0.165547679 |
| LOC648999 | -0.034227936 | 5.864080484 | 0.165703535 |
| MC3R      | -0.037591292 | 5.935540725 | 0.165714046 |
| PRG3      | 0.035604881  | 5.990125206 | 0.165755921 |
| LOC650771 | 0.034273053  | 6.040209319 | 0.165837361 |
| OR4K1     | 0.031249805  | 6.132373856 | 0.165839803 |



## DEG.infomation

|           |              |             |             |
|-----------|--------------|-------------|-------------|
| LOC643844 | -0.028141167 | 6.014252829 | 0.165877087 |
| LOC645712 | -0.033553673 | 5.944434985 | 0.165908209 |
| FMR1NB    | -0.035590119 | 6.011189502 | 0.166031803 |
| LOC124685 | 0.037413061  | 5.908351275 | 0.166158267 |
| LOC728554 | -0.084538939 | 7.926984161 | 0.166197086 |
| ARRB1     | 0.050893575  | 7.399887248 | 0.166307506 |
| AP4M1     | 0.038874185  | 6.553229261 | 0.166378778 |
| KTI12     | -0.064466035 | 6.917979688 | 0.166399998 |
| MLL4      | -0.075129612 | 6.983958686 | 0.166440839 |
| YAP1      | 0.085157406  | 9.064620075 | 0.166447696 |
| BRD2      | -0.066204181 | 9.967628265 | 0.166481983 |
| LOC645648 | 0.064949672  | 6.000120813 | 0.166554191 |
| FAM117A   | 0.041216218  | 6.335223871 | 0.166635764 |
| BAP1      | -0.050972275 | 7.495629667 | 0.166686713 |
| NHLH2     | 0.02565894   | 6.074941398 | 0.166797228 |
| LOC652759 | 0.032543922  | 6.021233163 | 0.166816845 |
| NSUN4     | -0.049315687 | 8.040610202 | 0.166940283 |
| RANBP2    | 0.05310791   | 6.488207359 | 0.166988255 |
| LOC646194 | 0.051323222  | 5.912362356 | 0.167054744 |
| FSCB      | -0.025246562 | 5.986617526 | 0.167069784 |
| ZNF43     | 0.026230577  | 6.033589821 | 0.167091534 |
| HOXC8     | 0.034126395  | 6.06190763  | 0.16709754  |
| ARL2      | 0.057373852  | 11.0729282  | 0.167156582 |
| LOC645116 | -0.035135383 | 6.029568958 | 0.167169556 |
| C9ORF7    | 0.040271315  | 7.310751869 | 0.167193042 |
| TKTL1     | 0.129017195  | 7.926719918 | 0.167204991 |
| OFD1      | 0.044492068  | 7.182688704 | 0.167206115 |
| LOC400145 | 0.03450298   | 6.2929901   | 0.16728177  |
| NUP188    | 0.087578386  | 7.50766596  | 0.167292082 |
| LOC648667 | -0.03695358  | 5.995593446 | 0.167329407 |
| NCAPG     | -0.048315336 | 6.1535618   | 0.167336062 |
| LOC644873 | -0.038176274 | 6.091771698 | 0.167435317 |
| LOC644098 | -0.035157335 | 5.979353625 | 0.167439601 |
| ZSWIM1    | 0.055289909  | 8.123917042 | 0.167520377 |
| UCK1      | 0.050296667  | 6.597092971 | 0.167626833 |
| C2ORF65   | 0.045782496  | 6.526561543 | 0.167635764 |
| MYO10     | 0.06256683   | 6.787797743 | 0.1676379   |
| LOC652227 | 0.034888211  | 6.216956459 | 0.167717906 |
| PIGC      | -0.042897655 | 7.868838474 | 0.167724608 |
| C21ORF90  | -0.035377509 | 6.13542399  | 0.167742526 |
| LOC645330 | 0.033477803  | 6.130634677 | 0.167781029 |
| MAPK14    | -0.022539808 | 6.222351328 | 0.167884543 |
| LOC440927 | 0.091262301  | 12.12188728 | 0.16794448  |
| MGC16025  | 0.034181666  | 6.081623197 | 0.167946291 |
| SPINK7    | -0.032183994 | 6.015286388 | 0.168108217 |
| ZDHHC4    | 0.036226355  | 6.122336658 | 0.168137527 |
| PARP12    | -0.094412315 | 7.709621301 | 0.168138109 |
| LOC387940 | 0.034787585  | 6.07505022  | 0.168152941 |
| LOC652696 | -0.033327442 | 5.947344486 | 0.168319393 |
| WFDC2     | 0.025037253  | 6.317587478 | 0.168338678 |
| NPM2      | 0.036520186  | 6.248776534 | 0.168357205 |

## DEG.infomation

|           |              |             |             |
|-----------|--------------|-------------|-------------|
| LOC284672 | 0.035018407  | 6.05757975  | 0.16836649  |
| AMN1      | 0.051019477  | 6.648948351 | 0.168372511 |
| KRTAP17-1 | 0.033333009  | 6.000147816 | 0.168388431 |
| TCEB3C    | 0.033601512  | 5.965007321 | 0.168436761 |
| GTPBP3    | -0.044236569 | 7.227163699 | 0.168439848 |
| PCDHGA11  | -0.02571744  | 5.971173605 | 0.168444205 |
| CAB39     | -0.059483959 | 10.75264222 | 0.168462468 |
| LOC647854 | 0.034162975  | 6.125734877 | 0.168488847 |
| LOC651126 | 0.035760843  | 6.166654973 | 0.168538229 |
| LOC653920 | -0.03679782  | 5.942958828 | 0.168558808 |
| LOC401957 | -0.036086886 | 5.937613324 | 0.168606418 |
| GNB5      | 0.036840681  | 6.376870325 | 0.168652804 |
| TRPM1     | -0.035477184 | 5.92635686  | 0.168693472 |
| LOC644710 | -0.035068974 | 6.11620246  | 0.168704772 |
| PLAC2     | 0.041918362  | 6.676702202 | 0.168734575 |
| PRAMEF10  | 0.018775787  | 6.035897217 | 0.168750355 |
| YDJC      | -0.043148188 | 6.431662986 | 0.168752829 |
| LOC387723 | 0.03865377   | 5.910050149 | 0.168911018 |
| MGC87631  | 0.034870124  | 6.138912928 | 0.168941727 |
| C6ORF65   | -0.043947693 | 6.105611424 | 0.16896167  |
| LOC648745 | 0.041297987  | 5.882272717 | 0.16904479  |
| LOC653188 | 0.036726511  | 6.133371565 | 0.169179423 |
| SPATS2    | -0.042318286 | 6.512231369 | 0.169262818 |
| OVOL1     | -0.022620903 | 6.028901349 | 0.1692745   |
| TREML2P   | -0.039726475 | 6.063082239 | 0.169323737 |
| LOC648003 | -0.029484874 | 6.076466788 | 0.169358731 |
| SMG5      | 0.074166846  | 9.200899723 | 0.169406103 |
| SHROOM1   | 0.041718146  | 6.165493367 | 0.169481875 |
| LOC649493 | 0.032499651  | 6.239065436 | 0.169487881 |
| LOC643072 | 0.031298027  | 5.986615961 | 0.169633025 |
| LOC392563 | -0.030548922 | 6.033935353 | 0.169646622 |
| OR2AG2    | 0.040516053  | 6.081314532 | 0.169660841 |
| PAPPA2    | 0.027850815  | 6.026259361 | 0.169668757 |
| LOC643266 | 0.037224964  | 6.108914377 | 0.169670792 |
| TAS2R1    | -0.029973552 | 6.081160354 | 0.16968806  |
| GOLGA8F   | -0.035815518 | 6.022697166 | 0.169712973 |
| WDR81     | -0.102236954 | 6.285021244 | 0.169810225 |
| SPATA22   | 0.04962841   | 6.122450644 | 0.16992581  |
| TMEM108   | -0.052012353 | 6.564468848 | 0.169929306 |
| LHX3      | 0.023264115  | 6.132327362 | 0.169953661 |
| C9ORF167  | 0.055444496  | 7.131213534 | 0.169965657 |
| C10ORF99  | -0.03747444  | 6.072959425 | 0.170033753 |
| FUBP1     | 0.039195487  | 6.63847955  | 0.170035867 |
| RPS26L1   | -0.096895593 | 11.31731571 | 0.170044521 |
| FLJ46361  | 0.024700725  | 6.08275109  | 0.170062333 |
| LOC388344 | -0.091462074 | 6.755272613 | 0.170103173 |
| SF3A1     | 0.034861564  | 7.013591182 | 0.170201288 |
| OAS3      | -0.073501357 | 6.594860371 | 0.170242218 |
| OR10W1    | -0.024468673 | 6.094305013 | 0.170254551 |
| KRTAP24-1 | 0.03193067   | 6.038148808 | 0.170366141 |
| POU6F1    | 0.043855112  | 6.38666909  | 0.170366459 |

## DEG.infomation

|               |              |             |             |
|---------------|--------------|-------------|-------------|
| FLJ35816      | 0.036880334  | 6.043522669 | 0.170380961 |
| NTHL1         | 0.103885132  | 7.669034671 | 0.170382373 |
| CDK7          | 0.101801639  | 7.575022672 | 0.17062366  |
| CEP72         | 0.032993025  | 5.999936933 | 0.170626658 |
| C9ORF14       | -0.038918246 | 5.972328481 | 0.170671235 |
| IL1F6         | -0.031861278 | 5.945449675 | 0.170738091 |
| CXORF40A      | 0.051612517  | 8.219575987 | 0.170785121 |
| HTR3A         | -0.022538585 | 6.101824369 | 0.170803303 |
| GSK3B         | -0.06816194  | 8.269764022 | 0.170883943 |
| PLA2G4D       | 0.026121007  | 6.09160693  | 0.17088939  |
| NR2F1         | 0.045330698  | 6.142339289 | 0.17094469  |
| RPL26         | -0.096002482 | 11.00184206 | 0.171000796 |
| PCDHA4        | -0.042074032 | 6.179592078 | 0.171118316 |
| TERF2         | 0.050254937  | 7.696974337 | 0.171204566 |
| LOC650203     | -0.034768394 | 6.081090818 | 0.171215212 |
| PKD2L1        | -0.032835801 | 5.972543717 | 0.17132182  |
| LOC647710     | 0.036551812  | 6.415501047 | 0.171341069 |
| RGMB          | 0.052116938  | 6.680721303 | 0.171353463 |
| OR10H1        | 0.029885176  | 5.894279055 | 0.171429754 |
| OR4F16        | -0.032772785 | 5.986009718 | 0.171446142 |
| TMEM81        | 0.045886565  | 5.998217493 | 0.171453796 |
| OXGR1         | 0.025114522  | 6.1297788   | 0.171522514 |
| FLJ45983      | 0.04844944   | 6.051724329 | 0.17157907  |
| ZNF24         | -0.044542563 | 6.346535646 | 0.171608538 |
| PAX5          | -0.027794308 | 5.929158878 | 0.171628267 |
| GPR174        | -0.027720596 | 5.976707345 | 0.17163238  |
| LOC100101121  | 0.038696607  | 6.004280978 | 0.171818108 |
| FLJ43860      | -0.019004977 | 6.074236458 | 0.171819234 |
| RP13-360B22.2 | 0.038195969  | 6.147657293 | 0.171942752 |
| LOC441150     | 0.055966452  | 7.044748787 | 0.171950874 |
| LOC644989     | -0.032295085 | 6.081268969 | 0.17200363  |
| IQCF3         | -0.034892175 | 5.977285936 | 0.172032432 |
| UBA52         | -0.050786172 | 12.61397138 | 0.172088796 |
| AMPD3         | -0.022998341 | 6.131626816 | 0.17231988  |
| C1ORF110      | 0.039628875  | 6.085509102 | 0.172327848 |
| LOC642916     | 0.041671365  | 6.346432767 | 0.172355078 |
| LOC402569     | -0.035594145 | 5.9899423   | 0.172370013 |
| LSM10         | -0.05657232  | 8.733909635 | 0.172433113 |
| LOC730953     | 0.039556694  | 6.193821301 | 0.172606537 |
| LOC650061     | -0.036550163 | 6.019266631 | 0.1726234   |
| LOC644841     | -0.036461212 | 6.158944894 | 0.172738691 |
| KRTAP10-3     | -0.042195772 | 6.022254972 | 0.172803056 |
| TBPL1         | -0.079617614 | 8.745598887 | 0.172824508 |
| LOC391766     | 0.031154243  | 6.066663869 | 0.172850549 |
| CPM           | -0.023542449 | 6.465498311 | 0.172943852 |
| LOC730049     | -0.029802585 | 5.926453001 | 0.173024526 |
| FAM135A       | 0.047034564  | 6.993566728 | 0.173045878 |
| C20ORF55      | -0.048838058 | 6.310955734 | 0.173091991 |
| ESCO1         | 0.055416212  | 6.915553879 | 0.173109327 |
| BTBD7         | 0.033935861  | 6.993119401 | 0.173133914 |
| GPR55         | -0.039236897 | 6.01049522  | 0.173235848 |

## DEG.infomation

|           |              |             |             |
|-----------|--------------|-------------|-------------|
| FLJ25037  | 0.036760818  | 6.038014702 | 0.173328313 |
| LANCL3    | -0.030033435 | 5.966404616 | 0.173443936 |
| MRPS7     | 0.056358878  | 10.21064517 | 0.173470934 |
| KIAA1486  | -0.035008211 | 6.08475311  | 0.173481887 |
| MAGEB5    | 0.03579876   | 6.054141958 | 0.173529624 |
| PNRC1     | -0.040255253 | 6.161031116 | 0.173849168 |
| MGC4294   | 0.039332565  | 6.093168099 | 0.173895268 |
| LOC645045 | 0.034835204  | 6.079579578 | 0.17391731  |
| FLJ44048  | 0.042298984  | 6.033519607 | 0.173918767 |
| ST3GAL6   | 0.08722734   | 9.726545262 | 0.173925164 |
| QARS      | 0.054612163  | 11.43564911 | 0.173926844 |
| SGEF      | -0.030459333 | 6.078507294 | 0.174064136 |
| HPS3      | 0.048401695  | 6.652368609 | 0.174070461 |
| MGC102966 | 0.038371217  | 6.379663099 | 0.1740761   |
| OMG       | -0.039815331 | 5.942494096 | 0.174118272 |
| STYX      | 0.028663582  | 6.127126125 | 0.174185234 |
| LALBA     | -0.032541324 | 6.030492306 | 0.174233539 |
| POLDIP3   | 0.041319233  | 7.512849675 | 0.174397361 |
| C10ORF51  | -0.034608454 | 6.102330774 | 0.174414571 |
| LOC441925 | -0.035100576 | 5.987496803 | 0.17445677  |
| UMPS      | -0.035555919 | 5.963526961 | 0.17448875  |
| CHAF1B    | -0.048410373 | 6.113975433 | 0.174502411 |
| LOC649683 | 0.037050309  | 5.995713494 | 0.174535842 |
| BIK       | -0.035226251 | 5.930341143 | 0.17455079  |
| AOC3      | -0.071067253 | 6.139737177 | 0.174561319 |
| FAM86A    | -0.046836128 | 6.688921263 | 0.174667251 |
| ANO6      | -0.064251149 | 8.835196341 | 0.174684481 |
| CYP4X1    | -0.057119706 | 6.684632905 | 0.174741009 |
| LOC643608 | 0.035697887  | 6.048561821 | 0.174770459 |
| LOC442204 | 0.021812351  | 6.01661593  | 0.174823766 |
| KIF5C     | -0.030898975 | 6.286950868 | 0.174997621 |
| COMTD1    | -0.124523024 | 7.941998509 | 0.1751248   |
| KIAA0895  | -0.048618661 | 6.464603072 | 0.175216882 |
| SSNA1     | -0.063066047 | 8.320271187 | 0.175249637 |
| LOC643169 | 0.049589446  | 6.472602402 | 0.175319426 |
| SS18L2    | -0.07784997  | 10.33005649 | 0.175344907 |
| LOC651752 | -0.038792006 | 6.118823211 | 0.175433525 |
| LOC642355 | 0.038795743  | 6.019603479 | 0.175465012 |
| TMEM50A   | -0.046335717 | 6.756571047 | 0.175471258 |
| CXCL11    | -0.036829722 | 6.104708964 | 0.175527659 |
| UBE2D1    | 0.040772755  | 6.162310172 | 0.175557535 |
| LRRC29    | 0.030959484  | 6.325498479 | 0.175648202 |
| ILDR1     | -0.039311615 | 5.936383173 | 0.175688359 |
| DRGX      | -0.032906798 | 6.127342344 | 0.175740879 |
| ATPBD1B   | 0.06144756   | 7.939866339 | 0.175778681 |
| LOC653524 | 0.030647952  | 6.360852215 | 0.175795617 |
| LOC642863 | 0.03666621   | 6.024354618 | 0.175816613 |
| WDR87     | 0.025791183  | 6.110807035 | 0.175824017 |
| LOC644291 | 0.024015523  | 6.090751288 | 0.175839156 |
| LOC645282 | 0.038830488  | 6.151808944 | 0.176009581 |
| OR4A16    | -0.032875047 | 6.041888978 | 0.176034683 |

## DEG.infomation

|              |              |             |             |
|--------------|--------------|-------------|-------------|
| ZNF500       | 0.046213571  | 6.938400376 | 0.176100764 |
| DCTD         | -0.044870119 | 8.574768347 | 0.17620055  |
| LOC641742    | 0.049443937  | 6.126581836 | 0.176272524 |
| LOC440368    | -0.032520972 | 6.063859084 | 0.176312686 |
| LOC729732    | -0.033248    | 6.176559147 | 0.176353987 |
| OGDH         | -0.074576792 | 9.132108094 | 0.176379026 |
| SPAG4        | 0.042115667  | 6.227065034 | 0.17641174  |
| LOC641744    | -0.040299253 | 5.982729575 | 0.17656712  |
| GPR137       | 0.067897469  | 9.12390755  | 0.176578542 |
| FLT3LG       | -0.047462393 | 6.36258179  | 0.176603791 |
| SPINK2       | -0.036752787 | 6.051199927 | 0.17664652  |
| NOP5/NOP58   | -0.08509088  | 8.311896267 | 0.176678752 |
| KRT32        | -0.052328519 | 5.979051175 | 0.176693565 |
| BCL2L10      | -0.038595554 | 5.995788087 | 0.17670787  |
| PSMAL        | 0.036221545  | 6.004745104 | 0.176761402 |
| MRGPRX2      | 0.025223186  | 6.057936405 | 0.176848626 |
| GULP1        | -0.036695432 | 6.181720511 | 0.17689002  |
| HSD17B12     | -0.078771261 | 10.38909688 | 0.176917669 |
| C1ORF66      | 0.051661489  | 7.4310832   | 0.176953131 |
| LOC644656    | -0.041205314 | 5.906237734 | 0.177002081 |
| ELAVL4       | 0.038205248  | 6.115190468 | 0.177014174 |
| THOC3        | -0.054639025 | 6.81109861  | 0.177048389 |
| ZNF619       | 0.038609112  | 5.960566532 | 0.177086767 |
| LOC644986    | 0.034643571  | 6.033903839 | 0.177095978 |
| PROZ         | 0.036501601  | 5.971316988 | 0.177112444 |
| CENPF        | 0.043818859  | 6.211535335 | 0.177147027 |
| GLYATL2      | 0.041634573  | 6.017761289 | 0.177176233 |
| RP11-49G10.8 | 0.038342278  | 6.145582388 | 0.177279254 |
| TNFRSF11B    | -0.181852295 | 7.74437248  | 0.177414386 |
| HIST1H2BE    | 0.034562528  | 6.183042692 | 0.177447397 |
| LOC650780    | 0.041516546  | 6.499603288 | 0.177498676 |
| LOC644286    | 0.033697386  | 6.15430691  | 0.177548473 |
| DNMBP        | 0.030817265  | 6.043358906 | 0.177651814 |
| UCN3         | 0.037033751  | 6.143909441 | 0.177665172 |
| TRY1         | 0.036430614  | 6.12793538  | 0.177832193 |
| LOC645141    | 0.033737659  | 5.96721198  | 0.177856699 |
| KIAA1549     | -0.031803256 | 6.0424206   | 0.177909968 |
| LOC401237    | -0.035047427 | 6.316084915 | 0.177951262 |
| LOC645958    | -0.037093118 | 5.848754856 | 0.177965451 |
| C10ORF91     | 0.025755662  | 6.056688671 | 0.178139794 |
| SPAG11B      | -0.023920055 | 6.117603529 | 0.178165659 |
| KRTAP5-3     | 0.037182255  | 5.927040975 | 0.178239276 |
| MRPS5        | 0.061291589  | 9.381205818 | 0.178356551 |
| KIF19        | -0.033965944 | 5.973660894 | 0.178385571 |
| SCARNA15     | -0.035465798 | 5.964027594 | 0.178425944 |
| LOC646568    | 0.034463715  | 6.283108107 | 0.178434028 |
| C9ORF85      | 0.040875435  | 6.174677337 | 0.178434754 |
| LOC390110    | 0.032815851  | 6.155566662 | 0.178485468 |
| LOC646008    | 0.040302458  | 6.131784441 | 0.178511999 |
| UNC5CL       | 0.033251905  | 6.003594423 | 0.178741652 |
| MID2         | 0.026173915  | 6.501938869 | 0.178758369 |

## DEG.infomation

|              |              |             |             |
|--------------|--------------|-------------|-------------|
| LOC643761    | -0.042974615 | 5.902564984 | 0.178847608 |
| HAL          | -0.022818794 | 6.001835839 | 0.178873944 |
| LOC392196    | -0.033948554 | 5.921034518 | 0.178914334 |
| LOC645718    | 0.036308773  | 6.085621516 | 0.178967357 |
| NSUN5B       | -0.043472027 | 6.962360522 | 0.179088394 |
| COLEC10      | 0.035331365  | 6.042534123 | 0.17912552  |
| LOC647181    | -0.032328268 | 6.093624304 | 0.179140046 |
| LOC647513    | -0.040275292 | 5.930552911 | 0.179195857 |
| LOC644516    | 0.029997389  | 6.13034014  | 0.179255729 |
| FXYD6        | -0.074054481 | 8.423204254 | 0.179280178 |
| DDX19-DDX19L | 0.046067953  | 6.568396048 | 0.179292214 |
| LOC139735    | 0.030653368  | 6.10101143  | 0.17930784  |
| LOC644144    | -0.040110647 | 6.450161611 | 0.17940108  |
| FKBP15       | 0.046723647  | 6.953495796 | 0.179477746 |
| ACTN1        | -0.131687667 | 10.42025528 | 0.179513238 |
| LOC388481    | 0.033200954  | 6.042892188 | 0.179515611 |
| PDK1         | 0.038464887  | 6.537583935 | 0.179586589 |
| CEACAM7      | 0.035664422  | 5.957153593 | 0.179648542 |
| PRED57       | 0.043101622  | 6.154819044 | 0.179746823 |
| RBM1A3P      | -0.024987954 | 6.032185787 | 0.179754584 |
| LOC642989    | 0.12547874   | 9.821580543 | 0.179792273 |
| BPGM         | 0.028226107  | 6.55198542  | 0.179821162 |
| ZNF587       | 0.023920939  | 6.085082301 | 0.17990016  |
| FLJ13611     | -0.033120846 | 6.133873531 | 0.17995932  |
| LOC642934    | 0.138984038  | 9.658615857 | 0.180028639 |
| PREI3        | 0.061129174  | 8.401932031 | 0.1801456   |
| LOC654258    | 0.031506727  | 6.006022913 | 0.180154559 |
| WDR78        | 0.023615389  | 5.995428016 | 0.180177919 |
| LOC641823    | 0.037684401  | 6.380612363 | 0.18026397  |
| OR2A5        | 0.044116239  | 6.669172713 | 0.180327647 |
| RPL7         | 0.096465923  | 9.505148944 | 0.180330932 |
| LOC647347    | 0.042530899  | 5.977010873 | 0.180351906 |
| FLG2         | -0.025069459 | 6.011666791 | 0.18054584  |
| XKR3         | -0.033061848 | 5.888022371 | 0.180585871 |
| ALPK3        | 0.068237073  | 7.071501606 | 0.180721093 |
| DNAI1        | -0.032933021 | 6.096386722 | 0.180723123 |
| SYT2         | -0.033060587 | 5.917383504 | 0.180726838 |
| ATP6V0A4     | 0.019585063  | 6.027441701 | 0.180742887 |
| DISC2        | -0.036084818 | 6.131221758 | 0.180753595 |
| SNORD18C     | -0.034107685 | 5.955059978 | 0.180950505 |
| DUSP7        | -0.032627527 | 6.086613081 | 0.180988338 |
| LOC646813    | -0.036342961 | 6.215176718 | 0.181060538 |
| NUDT8        | -0.041065307 | 6.238200825 | 0.181112464 |
| GGT3P        | 0.040465438  | 6.300901878 | 0.181134395 |
| MAT1A        | -0.037594435 | 5.904898773 | 0.181193028 |
| MIPEP        | 0.138704073  | 9.034800628 | 0.181297551 |
| LOC652831    | -0.033476074 | 6.052118165 | 0.181416838 |
| SERPINA4     | -0.042836599 | 6.112713993 | 0.181468385 |
| LOC646734    | -0.040554013 | 6.095460996 | 0.181490639 |
| GIT1         | -0.048699804 | 6.828559483 | 0.181516335 |
| MRC1         | -0.023569751 | 6.027790299 | 0.1815282   |

## DEG.infomation

|           |              |             |             |
|-----------|--------------|-------------|-------------|
| LOC644175 | -0.035945283 | 6.027349779 | 0.181554333 |
| STXBP4    | 0.032533593  | 6.296921176 | 0.181644616 |
| MYB       | -0.032841438 | 6.174814947 | 0.181652208 |
| LOC644621 | 0.035134357  | 6.00298825  | 0.181754097 |
| CHMP1A    | 0.09081017   | 8.32086287  | 0.181758039 |
| TMOD2     | 0.029126778  | 5.967153461 | 0.181802821 |
| LOC644948 | 0.037637537  | 5.971220553 | 0.181854971 |
| CALCA     | -0.055890698 | 6.171647452 | 0.182005501 |
| CARD6     | -0.043580206 | 6.174250335 | 0.18207289  |
| LOC285442 | 0.030130395  | 6.018046821 | 0.182143915 |
| KIR2DL5B  | -0.023641348 | 5.966027848 | 0.182148203 |
| MGC50722  | -0.034169237 | 6.282539269 | 0.182186842 |
| EPX       | 0.064474853  | 5.990068755 | 0.182241471 |
| C11ORF72  | -0.029221873 | 6.049829674 | 0.182317504 |
| ZNF296    | -0.037148059 | 6.208788005 | 0.182352664 |
| PREB      | -0.082171486 | 7.342171916 | 0.182357957 |
| SMC1A     | -0.037750801 | 6.211642227 | 0.182438918 |
| LOC442180 | 0.042659388  | 6.17242512  | 0.182596667 |
| LOC649292 | 0.033004605  | 6.088797294 | 0.182619111 |
| LENG1     | -0.04829023  | 6.822986451 | 0.182671798 |
| FLJ40411  | 0.03214521   | 6.072673202 | 0.182729001 |
| LOC651511 | -0.057065054 | 5.990285211 | 0.182757043 |
| OR2A25    | -0.029006314 | 6.103426546 | 0.183009561 |
| LOC440918 | 0.03101626   | 6.168925787 | 0.183047081 |
| C12ORF61  | -0.034476699 | 5.958989875 | 0.183074551 |
| ZNF75     | 0.041859158  | 6.978579749 | 0.183150138 |
| MICALCL   | -0.040182195 | 5.998339595 | 0.183214137 |
| TAS2R41   | -0.034730474 | 6.164303178 | 0.183262637 |
| SRFBP1    | -0.04926043  | 6.896831194 | 0.183332976 |
| ATP9B     | 0.046631314  | 6.379584936 | 0.183384723 |
| C10ORF55  | 0.050373841  | 6.197259676 | 0.183386232 |
| LOC284417 | -0.035414392 | 6.225688322 | 0.18345828  |
| ELA2B     | 0.038588906  | 6.287158693 | 0.183543555 |
| GLYATL1   | 0.035672448  | 6.200058425 | 0.183627345 |
| LOC401180 | 0.027106005  | 6.295322028 | 0.183663481 |
| TFCP2L1   | 0.034167535  | 6.025594675 | 0.183694647 |
| MYBPC1    | -0.077607302 | 6.624703332 | 0.183720949 |
| GGTLC1    | 0.02123392   | 6.259811912 | 0.183728107 |
| LOC442124 | -0.035857486 | 6.171345409 | 0.18374652  |
| EPHA5     | 0.025190102  | 5.9681319   | 0.18375249  |
| CCL16     | 0.048225468  | 6.203713654 | 0.183759367 |
| TMEM52    | -0.038173112 | 6.113285114 | 0.183856976 |
| LOC650342 | 0.032566589  | 6.097120504 | 0.183935651 |
| LOC642148 | 0.030556311  | 6.051335    | 0.183943304 |
| LOC644086 | 0.053749366  | 6.513753191 | 0.183946159 |
| PADI1     | 0.035559088  | 6.133785318 | 0.183959507 |
| LOC642399 | 0.036645671  | 6.248511239 | 0.183978683 |
| ASZ1      | -0.024233761 | 5.912537941 | 0.18400449  |
| KRTAP19-3 | 0.039280417  | 5.93076292  | 0.184098999 |
| LOC646570 | -0.031874396 | 6.093335322 | 0.18416745  |
| LOC647225 | 0.036389853  | 6.192239439 | 0.184213933 |

## DEG.infomation

|           |              |             |             |
|-----------|--------------|-------------|-------------|
| MMP24     | 0.032896185  | 6.187414617 | 0.184215773 |
| AMMECR1L  | -0.075897759 | 7.676044641 | 0.184260278 |
| MAML1     | 0.027181785  | 6.409629342 | 0.184333791 |
| CGB1      | -0.024517475 | 6.048079347 | 0.184337332 |
| FOXJ2     | -0.063433654 | 10.32628078 | 0.184397022 |
| THAP8     | 0.038494562  | 6.067726015 | 0.184415941 |
| TAF7      | 0.06739563   | 9.188527159 | 0.184419732 |
| TMEM166   | -0.053722468 | 6.354943111 | 0.184438291 |
| PSMA6     | -0.051171573 | 11.38531091 | 0.184457929 |
| NKX6-2    | 0.032826437  | 6.119888885 | 0.184511316 |
| TIAF1     | 0.071337357  | 9.949935299 | 0.18453922  |
| LOC652501 | 0.02921454   | 6.00059574  | 0.184608535 |
| SVOPL     | -0.035298675 | 5.928740901 | 0.184644969 |
| TNFRSF10C | 0.037473238  | 6.652860247 | 0.184718316 |
| LOC643868 | 0.030956307  | 5.898523325 | 0.184735602 |
| AGBL3     | 0.03241822   | 5.997431444 | 0.184735958 |
| BTBD3     | -0.056615835 | 7.655083246 | 0.18476251  |
| LOC647460 | -0.032719329 | 6.229327242 | 0.184791634 |
| GMCL1L    | -0.033518106 | 5.901674922 | 0.184813514 |
| C14ORF78  | -0.07730896  | 6.54605423  | 0.184821562 |
| LOC643273 | -0.036239244 | 6.153696418 | 0.184861555 |
| LOC643248 | 0.03913906   | 6.024063566 | 0.18488732  |
| LOC442560 | 0.034344435  | 6.114429793 | 0.184946062 |
| LIPJ      | -0.035961699 | 6.20791153  | 0.185006642 |
| KRTAP5-4  | 0.034871698  | 5.969067062 | 0.185014373 |
| LOC645078 | 0.037121092  | 5.934521964 | 0.185145489 |
| PDZD8     | -0.048587455 | 6.927875617 | 0.185361547 |
| CASP12    | 0.035895678  | 6.018583079 | 0.18540763  |
| DEPDC7    | 0.020403305  | 6.055578867 | 0.185461874 |
| LOC651197 | -0.038524813 | 6.034564339 | 0.185492381 |
| KIAA1161  | 0.048535718  | 6.106613308 | 0.185504024 |
| KRT36     | 0.032643591  | 6.099996804 | 0.185529074 |
| GABRA3    | 0.040521099  | 5.986674266 | 0.185530212 |
| LOC650804 | -0.033967758 | 6.0296856   | 0.185593894 |
| NUDCD2    | 0.060439193  | 6.968914701 | 0.185661695 |
| AGR3      | 0.025694217  | 6.102289997 | 0.185662563 |
| PRAMEF7   | -0.018947464 | 6.128095248 | 0.185676503 |
| SC4MOL    | 0.080370714  | 7.366441656 | 0.185692527 |
| FLJ32255  | -0.03481511  | 6.150114413 | 0.185695469 |
| SEZ6      | -0.043714811 | 5.992324969 | 0.185743592 |
| LOC653570 | -0.032821316 | 6.01318901  | 0.185764789 |
| KLF1      | 0.033080095  | 6.40225486  | 0.185876947 |
| LOC652869 | 0.03327846   | 5.960607513 | 0.185936932 |
| ZDHHC23   | -0.0500752   | 6.183326707 | 0.185996746 |
| LOC646190 | -0.032947331 | 5.984424595 | 0.186024852 |
| CYP2D6    | -0.028296683 | 6.196888549 | 0.186100655 |
| DSTN      | 0.054885649  | 11.35393354 | 0.186177356 |
| LOC643344 | 0.033782984  | 5.934989987 | 0.186287769 |
| LOC652078 | 0.049344607  | 6.177754941 | 0.18634048  |
| ATPBD1C   | 0.042427581  | 6.057348687 | 0.186343295 |
| RAD9B     | -0.038710249 | 6.099874428 | 0.186397903 |



## DEG.infomation

|           |              |             |             |
|-----------|--------------|-------------|-------------|
| SCN1A     | 0.033955727  | 5.98988239  | 0.186425688 |
| LOC642210 | -0.074583187 | 13.84811113 | 0.186632499 |
| BEST4     | 0.035082613  | 6.070377896 | 0.186661155 |
| LOC648645 | 0.03762078   | 6.049162368 | 0.186857601 |
| NANOS2    | 0.034475675  | 6.007007122 | 0.186867226 |
| LGI3      | -0.031871833 | 5.938478499 | 0.186924113 |
| LOC645545 | -0.032017364 | 6.017962677 | 0.186940039 |
| LOC650095 | -0.044263642 | 5.966923918 | 0.186975748 |
| ESPL1     | 0.043208027  | 6.874482213 | 0.186993006 |
| LOC652153 | 0.030091466  | 6.043287255 | 0.187165733 |
| ZDHC11    | -0.101588434 | 7.013288477 | 0.187181628 |
| AZU1      | -0.032705372 | 5.976705938 | 0.18721236  |
| TMOD1     | -0.051279604 | 11.82589794 | 0.187230535 |
| CHRM4     | 0.035519296  | 5.929605637 | 0.187258469 |
| GIPC3     | 0.028861041  | 5.914614973 | 0.187308676 |
| LOC441876 | -0.071527813 | 13.72767943 | 0.18739704  |
| ZNF711    | 0.031046248  | 6.072336999 | 0.187503149 |
| PCP2      | -0.032206993 | 6.150519928 | 0.187539644 |
| LOC441709 | -0.040943395 | 5.950559545 | 0.187568841 |
| C6ORF128  | -0.031802305 | 6.214696395 | 0.187591351 |
| LOC652882 | -0.029897263 | 5.964226476 | 0.187613441 |
| LOC648148 | 0.047056428  | 6.027272773 | 0.187757672 |
| LOC650770 | 0.033381872  | 6.017119799 | 0.187791502 |
| LOC643738 | 0.029229865  | 6.146562693 | 0.187865562 |
| HMBOX1    | -0.070540599 | 7.255561519 | 0.187866393 |
| C10ORF65  | 0.123445037  | 8.452910209 | 0.187905725 |
| MSMB      | -0.019952636 | 6.027129059 | 0.187975631 |
| UTY       | 0.054907959  | 6.228668023 | 0.187984027 |
| LOC649826 | -0.032504987 | 6.131477091 | 0.187995218 |
| OR2M4     | 0.0333149    | 6.091035479 | 0.188008302 |
| LOC642521 | 0.033872688  | 5.993462055 | 0.188057311 |
| C6ORF148  | 0.043708966  | 6.354909175 | 0.188148226 |
| IRF3      | -0.0443005   | 7.341667972 | 0.18819206  |
| CACNA1S   | -0.044447227 | 5.916632528 | 0.18823194  |
| NRN1L     | -0.033017233 | 6.174400442 | 0.188239209 |
| LOC650517 | 0.019010768  | 5.981320586 | 0.188256669 |
| OR4C15    | 0.023836749  | 6.109515533 | 0.188263509 |
| LOC648205 | -0.035096783 | 6.045372422 | 0.188270544 |
| SRCAP     | -0.056819176 | 6.366726553 | 0.188343224 |
| IGSF10    | 0.061395097  | 6.152018884 | 0.188363256 |
| OTUD5     | -0.056682832 | 6.480292616 | 0.188391622 |
| LOC644536 | -0.033144926 | 6.070051842 | 0.188416795 |
| LOC642620 | 0.030267529  | 5.926881301 | 0.188446356 |
| LOC647488 | -0.03586455  | 6.258212907 | 0.188457795 |
| FUCA1     | 0.093568819  | 8.384096629 | 0.188546836 |
| CCL27     | 0.035801913  | 6.073904233 | 0.188548645 |
| FLJ21767  | -0.022536473 | 6.050276493 | 0.1887473   |
| COBL      | 0.105680958  | 8.255600886 | 0.188849678 |
| MIOX      | 0.031191094  | 6.023395969 | 0.18900912  |
| ZNF578    | 0.028361192  | 5.917909065 | 0.189019833 |
| LOC652147 | 0.034744977  | 5.955718169 | 0.189080987 |

## DEG.infomation

|           |              |             |             |
|-----------|--------------|-------------|-------------|
| LOC648982 | 0.029733834  | 6.188131005 | 0.189124362 |
| MFAP2     | -0.043273965 | 6.063242308 | 0.189146294 |
| CLCA2     | -0.034319435 | 5.975506518 | 0.189153197 |
| RBBP4     | 0.043327272  | 6.917127787 | 0.189176109 |
| MGC50273  | -0.022032484 | 5.974991811 | 0.189240537 |
| LOC647531 | -0.045489085 | 5.96556678  | 0.189282198 |
| VWCE      | -0.031645369 | 6.117887847 | 0.18929855  |
| MT1P2     | 0.039823914  | 5.886898011 | 0.189314616 |
| LOC641743 | -0.034517661 | 6.116139137 | 0.189376271 |
| PRDM10    | -0.03529092  | 6.879114889 | 0.189462807 |
| RPL32P3   | -0.024801525 | 6.076753849 | 0.189528586 |
| LOC646442 | 0.029924002  | 6.107748444 | 0.189627301 |
| LOC646149 | 0.034244458  | 6.028842079 | 0.189692001 |
| STK32A    | -0.035770637 | 5.943942935 | 0.189784021 |
| FBXL5     | 0.064313221  | 8.220365996 | 0.189899775 |
| LOC647028 | 0.035181667  | 5.988668503 | 0.189913596 |
| FLJ45721  | 0.039570328  | 6.004474232 | 0.189965144 |
| MYH15     | -0.037766838 | 6.012052161 | 0.189971907 |
| ZNRF1     | 0.042400693  | 6.088141539 | 0.190079796 |
| C2CD2L    | -0.037009989 | 6.353697787 | 0.190217047 |
| C17ORF92  | -0.032361912 | 6.091056223 | 0.1902599   |
| LOC732165 | 0.095661052  | 8.296466842 | 0.190271258 |
| LOC644033 | -0.078694726 | 7.981725196 | 0.190336058 |
| RAB5B     | 0.054577276  | 10.81244288 | 0.190366817 |
| LOC644768 | -0.02426622  | 6.019236383 | 0.190416101 |
| SLC8A2    | -0.035504513 | 6.178946781 | 0.190505997 |
| LOC653352 | -0.020648093 | 6.172703738 | 0.190520892 |
| KCNQ2     | -0.027381336 | 6.203286663 | 0.190543623 |
| WDR60     | 0.069505425  | 8.973229388 | 0.190562078 |
| LOC653200 | 0.031521556  | 6.047578878 | 0.190737123 |
| CNNM1     | 0.037088433  | 6.477864629 | 0.190796005 |
| KRTAP5-6  | -0.029896448 | 5.937382142 | 0.190960144 |
| OR56A4    | 0.030942336  | 5.993119243 | 0.19101789  |
| CDH7      | -0.021687615 | 6.166357233 | 0.191070617 |
| C9ORF27   | -0.035102754 | 5.865402026 | 0.191087689 |
| LOC653632 | 0.044785023  | 5.96389041  | 0.191097927 |
| LOC645289 | 0.065768927  | 6.967426458 | 0.191227262 |
| LOC644631 | -0.033779531 | 6.141627567 | 0.19136499  |
| RWDD2B    | 0.045518     | 7.163056988 | 0.191369339 |
| KCNJ11    | -0.044081369 | 6.205030391 | 0.19137923  |
| LOC653887 | 0.030487565  | 6.19000477  | 0.19143285  |
| HDAC10    | 0.037528562  | 6.16596227  | 0.191438401 |
| TFAP2D    | -0.035452012 | 5.999736454 | 0.191450668 |
| TUT1      | 0.039528163  | 6.902362024 | 0.191526136 |
| UHRF1BP1L | -0.02718527  | 6.460603582 | 0.191542914 |
| ZNF557    | -0.07690391  | 7.143082351 | 0.191674984 |
| VMO1      | -0.037368839 | 6.455409109 | 0.191745773 |
| ITGB5     | -0.058830056 | 9.920434638 | 0.191826868 |
| TET3      | -0.037009625 | 6.111341124 | 0.191857245 |
| FER1L4    | -0.025520053 | 6.089933248 | 0.19189532  |
| GCET2     | 0.026925839  | 6.068630461 | 0.191923805 |

## DEG.infomation

|           |              |             |             |
|-----------|--------------|-------------|-------------|
| LOC645553 | 0.032862081  | 6.022456035 | 0.191972465 |
| LOC650584 | 0.028980297  | 6.063663836 | 0.191982944 |
| LOC650463 | -0.034098126 | 6.075450596 | 0.191992292 |
| ZNRD1     | 0.045639633  | 7.543666753 | 0.192032804 |
| CHML      | 0.042824172  | 6.814279288 | 0.192093689 |
| KIAA0565  | -0.016166675 | 6.065578229 | 0.192137832 |
| LOC728601 | -0.032871773 | 5.881844578 | 0.192195663 |
| LOC728910 | 0.029494385  | 6.221090827 | 0.192274488 |
| ITGB1     | -0.065713112 | 11.09851236 | 0.192330048 |
| CLDN22    | -0.03503706  | 6.015670389 | 0.192354422 |
| LOC643570 | 0.034612012  | 6.099087805 | 0.192434228 |
| NUP50     | 0.02201503   | 6.421769249 | 0.192463016 |
| ZNF646    | 0.035844986  | 6.195979253 | 0.192496533 |
| LOC440776 | 0.051313645  | 6.282216676 | 0.192502811 |
| MGC45922  | 0.02609072   | 6.000909837 | 0.19252179  |
| GUK1      | 0.049991858  | 10.61113123 | 0.192526686 |
| TMEM190   | 0.036104242  | 5.978680902 | 0.192542344 |
| ADRA1D    | -0.034615198 | 6.271134475 | 0.192608596 |
| MAB21L1   | 0.04414666   | 6.117655223 | 0.192628271 |
| JMJD2D    | 0.047528228  | 6.10834504  | 0.192703349 |
| FLJ23754  | -0.034003574 | 6.198103482 | 0.192763577 |
| LOC652708 | 0.033159832  | 6.019561362 | 0.192804943 |
| TMIGD1    | 0.033709106  | 6.210724838 | 0.192822976 |
| LOC646227 | 0.031110707  | 6.085305204 | 0.192830906 |
| CD164L2   | -0.033578545 | 5.912466038 | 0.192929385 |
| C12ORF36  | -0.031798847 | 6.041345411 | 0.193102448 |
| COG1      | 0.052922401  | 7.522082417 | 0.193162321 |
| LRRC8B    | -0.034725089 | 6.07798497  | 0.193209165 |
| KIAA1604  | 0.055330041  | 6.318590678 | 0.193264621 |
| SNORD16   | 0.035582836  | 6.115611685 | 0.19328345  |
| ZNF789    | 0.029201085  | 6.630996462 | 0.193320509 |
| LOC644647 | -0.030362172 | 5.979393757 | 0.19333339  |
| MOBKL2B   | 0.039749712  | 6.152359658 | 0.193581098 |
| LOC283278 | -0.02975112  | 5.950385698 | 0.193604256 |
| ZBP1      | -0.051875218 | 7.820447921 | 0.193619126 |
| BLNK      | -0.034098375 | 5.923675671 | 0.193640232 |
| MYOHD1    | 0.035794914  | 6.169889551 | 0.193643599 |
| FLJ42393  | -0.042553281 | 6.256260984 | 0.193674706 |
| LOC440525 | -0.035471443 | 6.067725811 | 0.193686215 |
| PATZ1     | 0.027193934  | 6.050532645 | 0.193713818 |
| SUCNR1    | 0.030840128  | 6.079633731 | 0.193833357 |
| MYCBP     | -0.034459109 | 6.245267263 | 0.193840159 |
| CACNG7    | -0.035797019 | 5.982135237 | 0.193898384 |
| LOC652713 | 0.031554881  | 6.230140463 | 0.193979767 |
| LOC642471 | 0.032722524  | 6.113248592 | 0.19400455  |
| OR1L6     | -0.038534592 | 5.947714067 | 0.194008652 |
| LOC339240 | 0.02926503   | 6.00500329  | 0.194070378 |
| LOC653905 | 0.028418008  | 6.075171336 | 0.194089632 |
| CAMTA2    | 0.043854142  | 6.28421784  | 0.194138671 |
| LOC401087 | 0.03203784   | 6.01163327  | 0.194246273 |
| KRTAP5-5  | -0.032460676 | 5.897031293 | 0.194296949 |

## DEG.infomation

|              |              |             |             |
|--------------|--------------|-------------|-------------|
| FLJ31813     | -0.031484931 | 6.117924375 | 0.194297605 |
| LOC650433    | -0.033843817 | 6.237254802 | 0.194313518 |
| LOC200493    | 0.036750264  | 6.230655922 | 0.194319739 |
| DOCK4        | -0.039936692 | 5.933778712 | 0.194393551 |
| AGXT2        | -0.029463431 | 6.003892132 | 0.194420105 |
| GTF2IRD2     | 0.047996822  | 6.67469026  | 0.194422108 |
| SC65         | -0.055075052 | 7.034302309 | 0.19443698  |
| NAT12        | 0.056239722  | 6.77148554  | 0.194449902 |
| C2ORF39      | -0.034963306 | 6.003365317 | 0.194470569 |
| MFS9         | -0.0315719   | 6.180474641 | 0.194550227 |
| PSG5         | -0.023067152 | 5.937930077 | 0.194584896 |
| RAB4A        | 0.077716674  | 8.602571655 | 0.19462594  |
| LOC642181    | -0.040356204 | 5.982295994 | 0.194742408 |
| LOC155060    | 0.031482077  | 6.25440289  | 0.194751254 |
| LOC649021    | -0.038953049 | 6.033532054 | 0.194764138 |
| ANKRD41      | 0.027020947  | 6.420107921 | 0.194786599 |
| LOC653155    | 0.028856522  | 6.063685731 | 0.194938409 |
| PADI2        | -0.055217429 | 6.045382498 | 0.194999447 |
| SFRS14       | 0.070649739  | 8.996696388 | 0.195038347 |
| CDH6         | 0.031725051  | 6.408429531 | 0.195042975 |
| PLXNA2       | -0.045137826 | 6.565168518 | 0.19504717  |
| KLHL18       | 0.047056886  | 6.894871984 | 0.195163118 |
| PDE4A        | -0.045968008 | 6.302937237 | 0.195308423 |
| C20ORF96     | 0.029809001  | 6.090217925 | 0.195330159 |
| LOC196752    | -0.078247864 | 6.782735715 | 0.195333016 |
| LOC642343    | 0.028716779  | 6.069327481 | 0.19539396  |
| LOC647331    | -0.028670285 | 6.161575969 | 0.19539467  |
| LOC375748    | 0.036358079  | 6.074764743 | 0.195621153 |
| LOC441136    | 0.042022723  | 6.429387334 | 0.195626547 |
| LRRC23       | 0.054667609  | 6.85531504  | 0.195695357 |
| DKFZP434K191 | -0.061908738 | 7.388738868 | 0.195705001 |
| LOC644193    | -0.034011184 | 6.161010712 | 0.195867473 |
| FLJ10803     | 0.041026519  | 6.343765355 | 0.196041065 |
| RBM17        | 0.050948587  | 9.39835852  | 0.19606673  |
| LOC646426    | -0.033370551 | 6.300575603 | 0.196090109 |
| F7           | 0.021196992  | 6.138407991 | 0.196148654 |
| FLJ43987     | 0.032778902  | 6.01050694  | 0.196149613 |
| CCDC12       | -0.059759664 | 9.261617829 | 0.196158014 |
| AGBL4        | -0.034743957 | 5.944843168 | 0.196215909 |
| TMEM163      | 0.043865524  | 6.219298171 | 0.196260141 |
| RSPH10B      | 0.016485017  | 6.109814784 | 0.196261316 |
| LOC389676    | 0.039711132  | 6.10234121  | 0.196452402 |
| LOC646345    | 0.028968923  | 6.104831444 | 0.196456401 |
| LOC653563    | -0.031413361 | 6.048440226 | 0.19645958  |
| CT45-4       | 0.018361909  | 6.029115791 | 0.196489773 |
| PLEKHG5      | -0.019073662 | 6.035659311 | 0.196506635 |
| LOC647079    | -0.025597191 | 5.949878608 | 0.196675783 |
| LOC730249    | 0.029415897  | 6.194133153 | 0.196695351 |
| LOC158730    | -0.028069191 | 5.927674348 | 0.196699693 |
| LOC341604    | -0.02949227  | 6.125613891 | 0.197082964 |
| LOC651562    | 0.03489709   | 5.964266597 | 0.197159696 |

## DEG.infomation

|           |              |             |             |
|-----------|--------------|-------------|-------------|
| IQCE      | 0.034928591  | 6.185276947 | 0.197160012 |
| OR13G1    | 0.034444656  | 6.056318618 | 0.197168341 |
| LOC653355 | -0.051907661 | 6.153441819 | 0.197185055 |
| DDHD2     | 0.054201466  | 8.254620883 | 0.197202714 |
| LIPL4     | 0.023042266  | 6.087756169 | 0.197247773 |
| EMX2      | 0.025988116  | 6.150897376 | 0.197274696 |
| RPL15     | 0.068048294  | 11.27301134 | 0.19728207  |
| LOC654335 | -0.029812181 | 6.12333518  | 0.197314293 |
| LOC644116 | 0.03390142   | 6.205159059 | 0.197338532 |
| ROS1      | 0.026913833  | 6.022646295 | 0.197385449 |
| LOC340156 | 0.042273993  | 6.247329925 | 0.197392759 |
| LOC646589 | -0.033987116 | 6.057718934 | 0.197461772 |
| KIR3DL1   | -0.023832728 | 6.080837758 | 0.197495665 |
| GRIK1     | -0.022962739 | 5.976736161 | 0.197523812 |
| CD5       | -0.029630419 | 6.07467386  | 0.197655904 |
| RNF112    | -0.036427687 | 6.571316481 | 0.197705232 |
| HERV-FRD  | 0.038560831  | 6.336136    | 0.197708932 |
| STARD10   | -0.083484244 | 9.03050344  | 0.197723123 |
| NCKAP1    | -0.086367101 | 8.53462318  | 0.197747159 |
| LOC649200 | -0.031257288 | 6.016512542 | 0.197776118 |
| TSPYL4    | -0.061048751 | 6.933756308 | 0.197806007 |
| LOC641721 | 0.028854852  | 6.009811823 | 0.197839664 |
| LOC646970 | -0.033023123 | 5.874839968 | 0.197871802 |
| LOC647606 | -0.053218961 | 6.191246522 | 0.198007624 |
| FLRT1     | -0.035868105 | 6.067392685 | 0.198015284 |
| LOC644001 | -0.038223028 | 6.207365232 | 0.198021341 |
| LOC646835 | 0.030354376  | 5.968098507 | 0.198102199 |
| LOC651344 | -0.03494678  | 5.994277008 | 0.198191386 |
| KCNJ5     | -0.048421746 | 6.472176937 | 0.198238915 |
| LOC653392 | 0.032368325  | 6.237297808 | 0.198300607 |
| FAM151B   | 0.035434444  | 6.180287803 | 0.198415081 |
| ALPK2     | 0.11854981   | 10.97731185 | 0.198480386 |
| DRG2      | 0.045297104  | 7.551874855 | 0.19853785  |
| NR5A2     | -0.031945849 | 6.292509666 | 0.198636785 |
| LOC647406 | -0.033610743 | 6.183400094 | 0.19868577  |
| MGAT5B    | -0.027251245 | 6.111062839 | 0.198723517 |
| LOC260339 | 0.022476347  | 6.090900759 | 0.198776468 |
| LOC653225 | 0.035387087  | 5.923013307 | 0.198813504 |
| SLC5A1    | -0.143247852 | 9.84496806  | 0.198853713 |
| ART5      | -0.033165368 | 6.063044698 | 0.198866997 |
| LY6G5C    | 0.022703591  | 6.144189068 | 0.198893798 |
| ZXDB      | 0.039328295  | 6.587937391 | 0.199201089 |
| DEFB137   | -0.03141356  | 5.942004295 | 0.199224023 |
| RTP2      | -0.036080924 | 6.148041655 | 0.199393874 |
| CABLES1   | 0.051136255  | 7.154734935 | 0.199509282 |
| LRRK1     | -0.031126941 | 6.111583341 | 0.199523952 |
| ASAH3     | 0.027476547  | 6.052979368 | 0.199614118 |
| PPP3R1    | -0.087890583 | 8.430822099 | 0.199615311 |
| CLK3      | 0.035520234  | 7.874707441 | 0.199630649 |
| LRRTM1    | 0.026015598  | 6.116087574 | 0.199671852 |
| LOC645967 | -0.044001465 | 6.075682398 | 0.199722075 |

## DEG.infomation

|           |              |             |             |
|-----------|--------------|-------------|-------------|
| LOC649431 | -0.03359829  | 5.996883382 | 0.19979854  |
| SOCS6     | 0.057384813  | 6.212911626 | 0.199854209 |
| LOC641726 | 0.033954797  | 5.930628905 | 0.200007367 |
| LCE3B     | 0.032236491  | 5.991528416 | 0.200051936 |
| MYCBP2    | 0.056258774  | 8.56835548  | 0.200070145 |
| HIST1H2BD | 0.08202558   | 9.098368794 | 0.200170837 |
| MTMR1     | -0.02228187  | 6.156448687 | 0.200205669 |
| LILRA4    | 0.059318171  | 6.001689256 | 0.200242473 |
| LOC647060 | 0.03993186   | 6.137438103 | 0.200265337 |
| OR4K5     | -0.028800183 | 5.996609844 | 0.200353578 |
| GOT1      | 0.071536728  | 12.87722458 | 0.200468827 |
| LOC654117 | -0.031337372 | 6.171207538 | 0.200548109 |
| LOC643491 | 0.030200867  | 6.021182657 | 0.200628097 |
| LOC648145 | 0.027662092  | 6.161881825 | 0.200764135 |
| KLRC3     | -0.019872937 | 5.965191377 | 0.200781536 |
| TSHB      | -0.033056369 | 5.982302749 | 0.200814082 |
| BAGE4     | 0.026940982  | 5.934593456 | 0.200825005 |
| LRRC37A3  | -0.032924264 | 5.895098954 | 0.200836978 |
| LOC645783 | 0.025730079  | 6.008439409 | 0.200840905 |
| TMEM119   | 0.131433481  | 7.028008972 | 0.200886945 |
| LOC646939 | 0.026782123  | 6.071555506 | 0.200887079 |
| LIPF      | -0.032209501 | 6.292389795 | 0.200997138 |
| LYRM4     | -0.063713657 | 6.760098061 | 0.201025704 |
| CWF19L1   | -0.060882321 | 9.317275238 | 0.201051101 |
| OR10H2    | 0.028548993  | 5.94058888  | 0.20109911  |
| MTFR1     | -0.08214198  | 7.772409368 | 0.201119123 |
| MIA       | 0.053047308  | 6.062122435 | 0.2011496   |
| ARMC8     | -0.033109204 | 6.599175555 | 0.201150544 |
| LOC440348 | -0.074199622 | 8.14291259  | 0.201186369 |
| LOC644083 | -0.034049206 | 6.085448155 | 0.201198446 |
| MORN3     | -0.038193232 | 6.028677876 | 0.201249712 |
| CHSY3     | 0.056615014  | 6.585948372 | 0.201258588 |
| ARL6IP4   | 0.060882236  | 8.091261929 | 0.201388845 |
| LOC390033 | 0.027212472  | 6.055223016 | 0.20141091  |
| HES3      | 0.030968512  | 6.125589071 | 0.201415383 |
| GNPDA2    | 0.045683676  | 7.312769958 | 0.201455055 |
| DNAJA1    | -0.092684749 | 10.69014515 | 0.201530779 |
| SYT16     | 0.053361407  | 6.141649934 | 0.201596503 |
| FLJ23172  | 0.030366438  | 5.893374043 | 0.201685299 |
| ESX1      | 0.03264243   | 6.033494621 | 0.201743288 |
| LOC283585 | 0.027699231  | 6.085735148 | 0.201809217 |
| LOC728395 | -0.034422918 | 6.098495684 | 0.202037578 |
| WDR26     | 0.050589381  | 8.141593033 | 0.202079614 |
| AMIGO1    | 0.042905891  | 6.313645995 | 0.202108631 |
| MRFAP1    | 0.051911501  | 11.40496419 | 0.202232244 |
| C16ORF70  | 0.041127938  | 6.936142105 | 0.20229343  |
| AGTRAP    | -0.069153062 | 6.910106404 | 0.202362459 |
| LOC390714 | 0.046317211  | 6.091639259 | 0.202374176 |
| CLEC14A   | -0.086101417 | 9.980054682 | 0.202430076 |
| LOC649821 | -0.066053491 | 11.63803569 | 0.202458482 |
| CTBP1     | -0.049036513 | 8.458381569 | 0.202473071 |

## DEG.infomation

|              |              |             |             |
|--------------|--------------|-------------|-------------|
| C19ORF44     | 0.044653469  | 7.00491108  | 0.20256611  |
| IL17F        | 0.034072561  | 5.955923911 | 0.20263085  |
| LOC440993    | 0.087826542  | 6.651158678 | 0.202680916 |
| LOC652271    | -0.028997529 | 6.192597632 | 0.202843967 |
| CA9          | 0.039440532  | 6.250998729 | 0.20293144  |
| NMU          | 0.034358378  | 5.876772535 | 0.202942195 |
| RP1          | 0.024399811  | 6.012967864 | 0.20311638  |
| FGF3         | -0.035541567 | 6.072936068 | 0.203198332 |
| LCORL        | 0.023886319  | 6.005103124 | 0.20322424  |
| PRR7         | 0.041297481  | 6.140141033 | 0.203230982 |
| LMAN1        | -0.051027349 | 6.571060537 | 0.203243334 |
| EPHX1        | -0.095071538 | 7.268987148 | 0.203258942 |
| MGAT5        | 0.073393853  | 9.027612726 | 0.203359965 |
| PAGE1        | -0.031689264 | 6.005407612 | 0.203376247 |
| LAMP3        | -0.024418192 | 6.050319301 | 0.20340108  |
| FAM126A      | 0.025096649  | 6.181521688 | 0.203478448 |
| NAT15        | -0.095449398 | 6.86207053  | 0.203506307 |
| TSNAXIP1     | 0.049124511  | 6.017048866 | 0.203544842 |
| DKFZP434B061 | 0.023017059  | 6.05159971  | 0.203675709 |
| LOC644672    | 0.043055396  | 6.163860766 | 0.20369146  |
| PSITPTE22    | -0.025524915 | 6.020423043 | 0.203758847 |
| CLIP2        | 0.038513662  | 6.555157127 | 0.20377817  |
| KRT23        | 0.027522513  | 6.433535847 | 0.203810785 |
| LOC650689    | 0.031385898  | 6.220750165 | 0.203831538 |
| AP3S1        | -0.066197895 | 8.132620971 | 0.203896834 |
| LENEP        | -0.03301304  | 5.987881025 | 0.204006894 |
| MGC52282     | 0.034089004  | 6.058374586 | 0.204332091 |
| ZNF579       | 0.048590774  | 6.529517828 | 0.204420479 |
| ADAMTS16     | -0.032860319 | 6.145873902 | 0.20442854  |
| C20ORF165    | -0.032007835 | 6.108046419 | 0.204452687 |
| LOC643904    | 0.025086199  | 6.016104478 | 0.20446154  |
| TDGF1        | 0.021210705  | 5.98068093  | 0.204481576 |
| SFMBT2       | 0.047652334  | 6.58645446  | 0.20454159  |
| PIWIL1       | -0.028499307 | 6.205089628 | 0.204572803 |
| LOC644097    | 0.034299997  | 5.919985524 | 0.204576181 |
| C13ORF3      | 0.034410687  | 6.10946908  | 0.204589641 |
| EFCAB5       | -0.020193923 | 6.016362861 | 0.204612083 |
| LDB2         | -0.078552513 | 9.942723103 | 0.204612366 |
| TFAP4        | 0.036511806  | 6.322468599 | 0.204621096 |
| LOC730417    | 0.019152718  | 6.258154736 | 0.204643887 |
| C20ORF185    | -0.030367225 | 5.994374522 | 0.20468416  |
| CLN5         | 0.051657057  | 7.889903604 | 0.204727572 |
| SCUBE3       | -0.033175575 | 6.211869825 | 0.204730244 |
| FER1L3       | 0.0891995    | 8.478335075 | 0.204787762 |
| SKIL         | -0.022520278 | 6.038918457 | 0.204896096 |
| LOC643895    | -0.031470685 | 5.92218417  | 0.204964544 |
| ZNF585B      | 0.027794509  | 6.208052272 | 0.204969354 |
| DUSP6        | 0.074762202  | 7.092599905 | 0.204996335 |
| CRYBA1       | 0.034496294  | 5.992845901 | 0.204997015 |
| SNCG         | -0.044705598 | 6.373818156 | 0.205039983 |
| TGM3         | -0.038689616 | 6.234081841 | 0.205177162 |

## DEG.infomation

|           |              |             |             |
|-----------|--------------|-------------|-------------|
| RNF31     | -0.046617161 | 7.608836972 | 0.205217889 |
| LOC651141 | -0.030864128 | 6.001465324 | 0.205222887 |
| SPOCK3    | -0.033028447 | 5.876891549 | 0.205255305 |
| NAPA      | 0.056525982  | 6.846620205 | 0.205256174 |
| RAD54L    | 0.042976255  | 6.113018019 | 0.205269685 |
| ALK       | -0.029305544 | 6.204676544 | 0.205325215 |
| LOC650167 | -0.022292164 | 6.064564581 | 0.205417957 |
| FBXL7     | 0.083908529  | 6.508534113 | 0.205455214 |
| LOC645212 | 0.03586248   | 6.375725597 | 0.205511705 |
| SLC5A2    | -0.024065083 | 6.033818264 | 0.205547691 |
| LOC391358 | -0.029392048 | 6.073307606 | 0.205550142 |
| GPATCH3   | 0.057720131  | 6.738513222 | 0.205801642 |
| IQCH      | 0.02119095   | 6.00435875  | 0.205812493 |
| LOC139587 | -0.028563721 | 6.025898041 | 0.205939772 |
| LOC653199 | 0.024719131  | 6.307006151 | 0.205995186 |
| KRT26     | -0.025706141 | 6.034932316 | 0.206026683 |
| EDG1      | 0.0740113    | 8.590164079 | 0.206068333 |
| WNK4      | -0.02932573  | 5.997952635 | 0.206074233 |
| MANSC1    | -0.037036379 | 6.715850586 | 0.206159643 |
| MORC4     | 0.041536912  | 6.301143043 | 0.206203538 |
| ZNF527    | 0.03423432   | 6.249911804 | 0.206230489 |
| PREX2     | -0.020592827 | 6.006050754 | 0.206287709 |
| ROR2      | -0.033333425 | 6.287810487 | 0.206346574 |
| LOC440742 | 0.02990845   | 6.017293545 | 0.206451454 |
| METTL6    | 0.037089234  | 6.461736899 | 0.206494462 |
| FSBP      | 0.028485335  | 6.125798163 | 0.206498761 |
| NAPG      | 0.07346466   | 6.797418576 | 0.206598013 |
| TSPYL6    | -0.037598613 | 6.067225222 | 0.20660888  |
| C14ORF115 | 0.043303817  | 6.086381476 | 0.206608947 |
| SEC61G    | -0.068190204 | 11.75138654 | 0.206652993 |
| INO80E    | -0.043140764 | 7.583302478 | 0.20666843  |
| LOC652789 | 0.03535641   | 6.222102569 | 0.206679183 |
| LOC645520 | 0.025055181  | 6.068079463 | 0.206712228 |
| ARFGAP1   | -0.055863511 | 7.046519352 | 0.206717138 |
| LOC644347 | 0.033131589  | 5.888172284 | 0.206827262 |
| LOC652490 | -0.028901012 | 6.053004327 | 0.206913863 |
| LOC649859 | -0.029288249 | 6.12271635  | 0.206921401 |
| DDN       | -0.047775816 | 6.260916738 | 0.207002918 |
| LOC651914 | 0.031953739  | 5.926050136 | 0.207035062 |
| LOC730877 | 0.030142647  | 6.321489365 | 0.207036963 |
| MAGEB16   | 0.033958797  | 6.027145156 | 0.207065297 |
| C1ORF147  | -0.041019252 | 6.177204832 | 0.207122649 |
| LOC651115 | -0.034727188 | 6.041005426 | 0.207182203 |
| C2ORF15   | 0.028854154  | 6.069802874 | 0.207240214 |
| HIST1H2BN | 0.034340983  | 6.064086123 | 0.207306716 |
| CDC42EP5  | -0.080648948 | 8.329123096 | 0.207315225 |
| LOC440354 | 0.05402767   | 7.631556859 | 0.207489023 |
| LOC645073 | 0.03525862   | 6.043257998 | 0.207494483 |
| NEFH      | -0.033270295 | 6.048695741 | 0.207552892 |
| PTPRB     | -0.068572283 | 7.976141413 | 0.207616864 |
| RPL22L1   | -0.038537635 | 6.155822429 | 0.207639563 |



## DEG.infomation

|           |              |             |             |
|-----------|--------------|-------------|-------------|
| ZNF746    | -0.041200046 | 7.748709053 | 0.2076636   |
| PYY       | 0.033391848  | 5.962933465 | 0.207767197 |
| LIFR      | -0.071429871 | 7.00658411  | 0.207781243 |
| LOC643718 | 0.028126045  | 5.975772982 | 0.207783154 |
| WASF3     | 0.058228374  | 7.782920952 | 0.207987594 |
| DSCAM     | 0.024554746  | 6.513525473 | 0.208057708 |
| STYXL1    | 0.077958241  | 7.792444944 | 0.208082749 |
| GCG       | 0.035595914  | 6.199739261 | 0.208109608 |
| SPARC     | -0.090000392 | 10.95467325 | 0.208125017 |
| LOC649680 | 0.039677228  | 6.054208053 | 0.208223127 |
| C8ORF78   | 0.0325421    | 5.915681752 | 0.208233023 |
| IL23A     | 0.030609793  | 6.017762662 | 0.208308276 |
| NASP      | -0.034673549 | 7.040658752 | 0.208357765 |
| RAXL1     | -0.089814101 | 8.68034277  | 0.208361546 |
| LOC730411 | -0.027881492 | 6.033931615 | 0.208368787 |
| CYB5R3    | 0.053208058  | 12.2677465  | 0.208373949 |
| HCN4      | -0.041611611 | 6.333291344 | 0.208446721 |
| CT45-6    | 0.030627989  | 6.077823047 | 0.208490395 |
| G3BP1     | -0.078009074 | 7.521944151 | 0.208523359 |
| S100G     | 0.031339482  | 5.908340022 | 0.208526058 |
| NUDT11    | -0.027074124 | 6.218590357 | 0.208537367 |
| ZNF804A   | -0.035074175 | 6.117232007 | 0.208563772 |
| LOC652400 | 0.031702177  | 6.261946597 | 0.208600084 |
| WDR54     | 0.071708733  | 7.784560984 | 0.208642663 |
| HIST1H3F  | 0.053741867  | 6.14277779  | 0.208661715 |
| STAG3L1   | 0.04125833   | 6.837399238 | 0.208683279 |
| OR1L1     | 0.031204884  | 6.004647475 | 0.208734958 |
| PTP4A3    | -0.104636047 | 10.12034045 | 0.208808634 |
| CNIH2     | 0.018677103  | 6.082010507 | 0.208852063 |
| LOC402279 | -0.033147559 | 5.910183206 | 0.208902981 |
| LOC654256 | 0.029637667  | 6.192706006 | 0.208903915 |
| SSB       | 0.050595153  | 8.435796945 | 0.208995478 |
| THPO      | -0.028355395 | 6.046348216 | 0.208996487 |
| SLC1A2    | 0.055905032  | 6.218887084 | 0.209120252 |
| AMTN      | 0.031584423  | 5.891321919 | 0.209196014 |
| TNFRSF18  | -0.020666339 | 5.990866605 | 0.209415593 |
| PRTG      | -0.018543475 | 6.002721968 | 0.209433624 |
| TNFRSF8   | -0.024311253 | 6.116125525 | 0.209479063 |
| LOC728505 | 0.038615602  | 6.374739202 | 0.209480351 |
| AMH       | 0.031550291  | 6.045245496 | 0.209490741 |
| LOC652645 | -0.032142071 | 5.924200336 | 0.209557815 |
| WDR40B    | -0.02114871  | 6.12432773  | 0.209686222 |
| LOC646774 | 0.038179864  | 6.289748979 | 0.209693468 |
| MT4       | -0.036015814 | 5.822380316 | 0.20975682  |
| PLK3      | 0.054528453  | 6.042711499 | 0.209791229 |
| CD24      | 0.05606117   | 6.267868798 | 0.20981983  |
| HIST4H4   | -0.028820592 | 5.979382574 | 0.209870262 |
| C4ORF6    | 0.032910744  | 6.10430783  | 0.20989868  |
| CLEC4A    | 0.032464709  | 6.468013736 | 0.210052628 |
| ZNF581    | 0.054524393  | 7.575627235 | 0.21010449  |
| ANKRD13D  | -0.016566822 | 6.243165341 | 0.210148023 |

## DEG.infomation

|               |              |             |             |
|---------------|--------------|-------------|-------------|
| LOC650494     | -0.034407088 | 6.021992455 | 0.210258189 |
| LOC441127     | 0.030594222  | 6.074632594 | 0.210302973 |
| LOC652680     | -0.028404996 | 6.00701154  | 0.210374261 |
| BCHE          | -0.068984011 | 6.771938125 | 0.210393326 |
| NAT8          | -0.03262511  | 6.092431631 | 0.210397097 |
| CHDH          | -0.034657911 | 5.907092908 | 0.210408896 |
| OR52H1        | 0.033127372  | 6.128692079 | 0.210411173 |
| LOC644916     | 0.03275736   | 6.014743028 | 0.210443244 |
| CCNE1         | -0.029677945 | 6.438566707 | 0.210480355 |
| LOC643318     | 0.027877522  | 6.035085456 | 0.210497908 |
| C2ORF37       | 0.038771575  | 6.249383771 | 0.210599792 |
| LOC727948     | 0.13582301   | 7.872692989 | 0.210605182 |
| ZBTB11        | 0.070573778  | 6.539962362 | 0.210634175 |
| LOC442406     | -0.026372815 | 6.047992962 | 0.210653108 |
| TRPC3         | -0.033261922 | 6.040334446 | 0.210700242 |
| PTPDC1        | -0.03681129  | 6.710089307 | 0.210722939 |
| MOCS3         | 0.029656368  | 6.211412558 | 0.210748011 |
| TAF9          | 0.073342957  | 7.297831318 | 0.210748945 |
| STX1A         | -0.035440665 | 6.343539741 | 0.210808332 |
| HYAL1         | 0.071928683  | 9.193352843 | 0.210930159 |
| CMTM4         | -0.029717445 | 6.792730096 | 0.210980138 |
| LOC653579     | 0.029881087  | 6.144209988 | 0.211005317 |
| GDI2          | -0.06893402  | 9.776614956 | 0.211047524 |
| ANP32E        | 0.046537856  | 5.966682929 | 0.211056268 |
| C15ORF60      | -0.042615302 | 6.103652305 | 0.211059567 |
| GPR63         | 0.0338946    | 6.093352328 | 0.21110076  |
| LG14          | 0.065867287  | 6.269658959 | 0.211199915 |
| C21ORF66      | 0.038945413  | 7.262592636 | 0.211204393 |
| DKFZP434B0335 | -0.062510871 | 6.913307984 | 0.211247126 |
| ZNF331        | 0.058656786  | 6.989497517 | 0.211269702 |
| FAM71F2       | 0.030931524  | 6.045603566 | 0.211281233 |
| SLC12A5       | 0.02809769   | 6.142810688 | 0.211353469 |
| LOC732372     | -0.039045342 | 5.916418662 | 0.211391406 |
| RTDR1         | -0.029453553 | 5.935348504 | 0.211441946 |
| NPY           | -0.030379725 | 6.093577047 | 0.211588551 |
| LOC644196     | 0.022974534  | 5.969797989 | 0.21159138  |
| LOC641765     | 0.024714244  | 6.245461595 | 0.211608161 |
| FAM118B       | 0.040296424  | 6.842585093 | 0.211704674 |
| ZFP41         | 0.026858021  | 6.050479301 | 0.21178216  |
| LOC650329     | -0.029900922 | 5.990492752 | 0.211809528 |
| TRPC2         | -0.025758559 | 6.011645015 | 0.211885521 |
| FLJ45832      | 0.030778753  | 6.207821977 | 0.211891097 |
| ULBP3         | -0.034154854 | 6.225008069 | 0.211907742 |
| AOC2          | 0.017750639  | 6.093928518 | 0.211972245 |
| LOC441119     | 0.033655964  | 6.025170835 | 0.212051142 |
| PSG7          | -0.024011225 | 5.933013991 | 0.212070624 |
| C12ORF24      | 0.078678994  | 7.484463903 | 0.212183515 |
| HCG3          | 0.045366938  | 6.002905108 | 0.212185007 |
| LOC388813     | -0.031576285 | 5.979911847 | 0.212245536 |
| C10ORF93      | 0.019307034  | 6.011376452 | 0.21229654  |
| LOC642167     | 0.029930076  | 6.178265184 | 0.212324988 |

## DEG.infomation

|           |              |             |             |
|-----------|--------------|-------------|-------------|
| TP73      | 0.037873429  | 5.9832952   | 0.212368037 |
| LOC647049 | 0.0302242    | 5.977808291 | 0.212417604 |
| SPNS3     | 0.031884405  | 6.060127478 | 0.212516465 |
| GGN       | 0.031166393  | 6.021157296 | 0.212579032 |
| LOC254398 | 0.030441109  | 6.15373403  | 0.212608338 |
| FOXP4     | -0.026839487 | 6.263182355 | 0.212609164 |
| LOC647843 | -0.026675541 | 6.046607233 | 0.212609318 |
| LOC645227 | -0.02857911  | 6.038497963 | 0.212646902 |
| LOC644931 | -0.105206997 | 7.158043805 | 0.212804694 |
| NEK5      | 0.030581559  | 5.923782668 | 0.212847379 |
| ADH7      | 0.03066687   | 5.96432239  | 0.212849299 |
| ATP5J2    | -0.036712044 | 11.92375113 | 0.212882544 |
| IDH3A     | 0.07651098   | 10.22232847 | 0.212908206 |
| NRD1      | -0.054285914 | 10.55262876 | 0.212973168 |
| FOXO4     | 0.116505738  | 8.175797084 | 0.212986703 |
| LOC650562 | 0.032292902  | 6.174053146 | 0.21306774  |
| MAP3K11   | -0.053249888 | 7.493348634 | 0.213122373 |
| SFRP2     | 0.049134016  | 6.049642241 | 0.213203104 |
| FEV       | 0.044879114  | 6.045197705 | 0.213274556 |
| CRTC1     | 0.035744395  | 6.404109281 | 0.213365059 |
| LOC730256 | 0.036716311  | 6.570199371 | 0.213534687 |
| LOC652612 | 0.032918816  | 6.088678019 | 0.213652063 |
| DUX5      | 0.03871739   | 5.900241292 | 0.213737515 |
| PPT2      | 0.022339796  | 6.49476071  | 0.213748417 |
| LOC648127 | -0.02839645  | 5.993886975 | 0.213787977 |
| LOC647519 | 0.030388269  | 5.981989121 | 0.213801489 |
| LOC650498 | -0.030697038 | 6.052804632 | 0.213884073 |
| CARS      | -0.057134389 | 7.282407593 | 0.213916916 |
| LOC283999 | -0.031791335 | 6.33308963  | 0.214273546 |
| FAM161B   | 0.034381771  | 6.079747429 | 0.214299323 |
| RANBP9    | 0.060165992  | 6.545911453 | 0.214410729 |
| SGCB      | 0.083662035  | 7.753150995 | 0.214655387 |
| LOC646132 | -0.032572494 | 6.16779616  | 0.214685721 |
| PRDM4     | -0.064415743 | 8.085599141 | 0.214695228 |
| DPM3      | 0.063847968  | 8.933945997 | 0.214806996 |
| ANKRD13B  | -0.036100855 | 6.170288252 | 0.214816245 |
| LOC646772 | -0.03116297  | 6.033298477 | 0.21485808  |
| LOC728481 | 0.079576738  | 11.88382777 | 0.214921613 |
| TMEM156   | 0.040569677  | 6.417123228 | 0.21495791  |
| GPR157    | -0.029391834 | 5.962493191 | 0.215172201 |
| LOC645551 | -0.029315003 | 6.044639518 | 0.215264044 |
| KIAA0586  | -0.043767403 | 7.446511434 | 0.215470228 |
| LOC643696 | 0.029126974  | 6.079791273 | 0.215718644 |
| TBPL2     | 0.032645938  | 6.193941073 | 0.215800379 |
| CEACAM20  | 0.032097842  | 5.962270956 | 0.215801715 |
| LOC649817 | 0.03104898   | 6.05286893  | 0.215805599 |
| GNL3L     | -0.082090923 | 8.458015057 | 0.215815054 |
| LOC642185 | -0.030697975 | 6.169416501 | 0.215828643 |
| C10ORF37  | 0.023438407  | 6.064590863 | 0.215863544 |
| SLC12A2   | 0.061703861  | 7.415313588 | 0.215886259 |
| SLC4A3    | -0.111080952 | 8.877252213 | 0.215935668 |

## DEG.infomation

|           |              |             |             |
|-----------|--------------|-------------|-------------|
| LOC650961 | 0.036092866  | 6.054303408 | 0.215948718 |
| SLC24A5   | 0.032880733  | 5.948921827 | 0.216017285 |
| SRP68     | -0.054334561 | 9.43145074  | 0.216176051 |
| LRRTM3    | -0.024140379 | 6.007087512 | 0.216275002 |
| KIFC3     | 0.050219046  | 5.98265293  | 0.216315237 |
| NCOA6     | 0.048169012  | 8.917561344 | 0.216467342 |
| CENPL     | -0.035002736 | 6.379478172 | 0.2165281   |
| PAX6      | 0.037187022  | 6.162638179 | 0.216533572 |
| TXNL4B    | 0.047281272  | 6.607281581 | 0.216536238 |
| ZNF143    | -0.061051239 | 7.489673878 | 0.216556099 |
| IL17REL   | -0.032014499 | 6.148286437 | 0.216582764 |
| GLRX5     | -0.052777763 | 12.38181766 | 0.216736023 |
| LOC645186 | 0.034384147  | 6.118265862 | 0.2169113   |
| LOC644172 | 0.027923983  | 6.272145569 | 0.216942466 |
| SCYE1     | 0.03067446   | 6.075695688 | 0.216984003 |
| NR5A1     | -0.029538449 | 6.02481602  | 0.217050889 |
| PSKH1     | -0.037792163 | 6.218404215 | 0.217110313 |
| TM9SF4    | -0.043643403 | 8.545647347 | 0.217126091 |
| SOAT1     | -0.039900221 | 6.436950948 | 0.217226478 |
| C6ORF27   | 0.032480552  | 6.238530291 | 0.217291095 |
| RAB20     | -0.052450482 | 6.789557729 | 0.217325551 |
| CDC37L1   | -0.078757537 | 6.523917739 | 0.217330014 |
| C10ORF49  | 0.044775152  | 6.270053989 | 0.217500462 |
| LOC643225 | -0.026982611 | 5.940502754 | 0.217501428 |
| LDB1      | 0.048745717  | 6.164454322 | 0.217593904 |
| TMEM164   | 0.05934775   | 6.997141059 | 0.217660857 |
| MYT1L     | 0.021215535  | 6.02038579  | 0.217665466 |
| KRT1      | 0.030628277  | 5.924356213 | 0.217691001 |
| ACOT11    | 0.098085055  | 8.955369508 | 0.217778416 |
| LOC402066 | -0.038075196 | 6.645101033 | 0.217817427 |
| LOC340228 | 0.035821674  | 6.042863236 | 0.217861598 |
| LOC389365 | 0.036820605  | 6.192060151 | 0.217935729 |
| ACN9      | 0.069987549  | 8.597025555 | 0.217958217 |
| C20ORF160 | 0.056216448  | 8.30932818  | 0.217968603 |
| OR5AN1    | -0.029159501 | 6.09651978  | 0.218065638 |
| LOC283487 | -0.034725575 | 6.245891456 | 0.2181912   |
| IFNA8     | 0.052333949  | 7.048252034 | 0.21825499  |
| LCE1B     | -0.035150696 | 6.118256576 | 0.218309676 |
| ZNF345    | 0.025813493  | 6.224198906 | 0.218311454 |
| LRAT      | -0.032003454 | 6.056793578 | 0.218349135 |
| SLC5A12   | -0.018234604 | 5.961834085 | 0.218367524 |
| SULT1A4   | 0.040934254  | 6.942327123 | 0.218379062 |
| OR2T29    | 0.029365402  | 6.011456436 | 0.218389225 |
| LOC399746 | -0.028502536 | 6.028761992 | 0.218446161 |
| PSMD9     | -0.033544677 | 6.693719539 | 0.21850597  |
| RBM15B    | -0.055378836 | 6.367315361 | 0.21853891  |
| EPS8L1    | 0.019354129  | 6.046869818 | 0.218594782 |
| SEMA3G    | 0.070011676  | 6.360765464 | 0.218620899 |
| XKR7      | -0.029359818 | 6.07561791  | 0.218624444 |
| DBNDD1    | -0.059339881 | 6.932628163 | 0.218635657 |
| LSM5      | 0.069414935  | 9.608287247 | 0.218662633 |

## DEG.infomation

|           |              |             |             |
|-----------|--------------|-------------|-------------|
| TBR1      | 0.030766717  | 6.005704718 | 0.218714817 |
| ACSF3     | 0.03585927   | 6.114653193 | 0.218816269 |
| LOC390876 | -0.042108813 | 6.350358642 | 0.218818693 |
| RNF17     | 0.019525709  | 5.98498855  | 0.218948747 |
| C1D       | 0.026335318  | 6.158255707 | 0.219005144 |
| DAZ2      | 0.022753374  | 6.054173174 | 0.219023045 |
| IMPAD1    | -0.065729978 | 8.112505741 | 0.219051784 |
| LOC644168 | -0.031072609 | 6.241975927 | 0.219105391 |
| TLX1      | 0.036344186  | 6.108072841 | 0.219162968 |
| LOC645839 | -0.029262141 | 6.014474139 | 0.219275187 |
| ARVP6125  | 0.031876199  | 6.243699259 | 0.219325233 |
| LOC643125 | 0.028880064  | 6.073844506 | 0.219425796 |
| LOC644769 | 0.030611797  | 6.04207152  | 0.219477067 |
| LOC400197 | 0.030752856  | 6.172104769 | 0.21947897  |
| ZFAND3    | -0.049282825 | 8.174158088 | 0.219554228 |
| LOC644427 | 0.033596484  | 6.010021439 | 0.219597516 |
| SLC2A10   | 0.040260333  | 6.72858515  | 0.219679238 |
| CCDC138   | -0.032728768 | 6.125605691 | 0.21975456  |
| HCP5      | -0.075458757 | 8.784061059 | 0.219756459 |
| MEI1      | -0.02082471  | 6.124666415 | 0.219771156 |
| RASGEF1A  | -0.041355284 | 5.832870737 | 0.219824354 |
| DACH2     | 0.030506491  | 6.053672398 | 0.219923199 |
| CDRT15    | 0.030318868  | 6.026359941 | 0.219944841 |
| LOC641719 | 0.034985995  | 5.930567793 | 0.220159062 |
| C14ORF125 | 0.052910704  | 6.302281733 | 0.220334445 |
| IFNK      | 0.042556412  | 5.909716236 | 0.220338737 |
| L3MBTL3   | 0.022620826  | 6.204019993 | 0.220371329 |
| LOC646359 | -0.027820418 | 6.073799208 | 0.22058595  |
| GPC6      | 0.045251997  | 7.505046927 | 0.220596519 |
| TNFSF14   | -0.067479308 | 8.017835216 | 0.220756995 |
| TMCC3     | -0.036928737 | 5.9982998   | 0.22078102  |
| LOC642879 | -0.030034583 | 5.989187664 | 0.220954187 |
| LOC401137 | 0.02035595   | 5.980904627 | 0.221046157 |
| UBAC2     | 0.062027643  | 8.800286828 | 0.221065036 |
| LOC388565 | -0.030568681 | 6.288956113 | 0.221083015 |
| MCOLN2    | -0.041512684 | 6.175497288 | 0.221104153 |
| LOC650724 | 0.031128019  | 6.139705507 | 0.221124545 |
| IFRG15    | -0.0350337   | 6.143375962 | 0.221185463 |
| LOC255620 | -0.023588009 | 6.065485582 | 0.221260549 |
| AMAC1     | 0.038618012  | 6.184531425 | 0.221329806 |
| P2RY4     | 0.041586587  | 6.049276084 | 0.221362131 |
| SLC39A5   | 0.042674744  | 5.966728124 | 0.221462049 |
| LOC654056 | 0.032729979  | 5.858459459 | 0.221464597 |
| CAPN10    | 0.021348894  | 6.39145541  | 0.221499414 |
| LOC648576 | 0.026932087  | 5.959578532 | 0.221546242 |
| C8ORF48   | 0.041084373  | 6.812173907 | 0.221611004 |
| LOC643146 | 0.027063812  | 6.099492536 | 0.221670097 |
| CNIH3     | 0.032691841  | 6.096652669 | 0.221790015 |
| FLJ20433  | -0.039827233 | 6.363730388 | 0.221791564 |
| TUBB8     | 0.031698995  | 6.012721601 | 0.221812952 |
| LOC643505 | 0.038307109  | 6.748105382 | 0.22184824  |

## DEG.infomation

|           |              |             |             |
|-----------|--------------|-------------|-------------|
| C14ORF70  | -0.031581182 | 6.036244606 | 0.221880114 |
| DPPA3     | -0.020552129 | 6.031894592 | 0.221968334 |
| IL22RA2   | 0.026738728  | 6.042745918 | 0.222033043 |
| LRP1      | -0.080182203 | 6.710889891 | 0.222093832 |
| FLJ35776  | -0.02272124  | 6.01204834  | 0.222170362 |
| LOC652183 | -0.033194893 | 5.92990578  | 0.222181451 |
| PRDM13    | -0.032724896 | 6.01237381  | 0.222188392 |
| POU5F2    | 0.037623073  | 6.159999511 | 0.222200471 |
| LOC650919 | 0.038235176  | 6.580656446 | 0.222205015 |
| SLC16A8   | 0.033068321  | 6.070829632 | 0.222240581 |
| LOC652808 | 0.028861649  | 6.077708188 | 0.222249984 |
| GALNT4    | -0.044773754 | 6.39013429  | 0.222264076 |
| MIF4GD    | 0.111633805  | 7.296297788 | 0.222305467 |
| YTHDF2    | -0.048785695 | 8.56496124  | 0.2223198   |
| LOC649318 | 0.029310895  | 6.162074781 | 0.222351848 |
| KIAA1522  | -0.041880047 | 6.55617128  | 0.222404228 |
| LOC643012 | 0.036216864  | 6.084253664 | 0.222411911 |
| LOC402269 | -0.029312058 | 6.03318369  | 0.222674532 |
| LOC652886 | 0.030832186  | 6.277419834 | 0.222723534 |
| ADARB2    | -0.030562571 | 6.179124657 | 0.222741098 |
| LOC649214 | 0.022228239  | 6.0671889   | 0.222931713 |
| LOC643805 | -0.033887302 | 6.101594306 | 0.222940021 |
| ZKSCAN5   | 0.023509675  | 6.27477015  | 0.222994518 |
| C10ORF18  | 0.031024847  | 6.133825624 | 0.223078375 |
| LOC649203 | -0.03096029  | 6.228916663 | 0.223212508 |
| C3ORF65   | 0.021071112  | 5.962680503 | 0.223219154 |
| LOC641810 | -0.031966274 | 5.937809681 | 0.223572581 |
| MAPRE3    | 0.05776171   | 8.548329287 | 0.223577075 |
| AQP6      | 0.036623715  | 6.906850377 | 0.223589264 |
| GATA1     | -0.031282737 | 6.012213532 | 0.22372702  |
| LOC653349 | -0.017224345 | 6.120765391 | 0.223864708 |
| LOC647147 | -0.033015448 | 6.009261301 | 0.223954301 |
| LARP4     | 0.080011658  | 8.179518434 | 0.224146291 |
| FLJ32867  | -0.02821437  | 6.090411031 | 0.22416628  |
| SMN2      | 0.050912361  | 6.293499922 | 0.224208802 |
| LOC645261 | 0.031724395  | 6.327724789 | 0.224214766 |
| LOC729378 | -0.032643298 | 6.098290872 | 0.22429591  |
| LOC642563 | 0.032483758  | 6.104419151 | 0.224354539 |
| YY2       | -0.029330325 | 6.104039302 | 0.224432229 |
| AP3M1     | -0.045847327 | 7.616874455 | 0.224469732 |
| LOC651004 | -0.030891871 | 6.156064719 | 0.224586177 |
| WNT9A     | 0.03000312   | 6.236600952 | 0.224756388 |
| MTO1      | 0.040877559  | 7.790474166 | 0.224930539 |
| LOC647546 | -0.028931226 | 6.096874833 | 0.224936812 |
| PSG4      | 0.020441599  | 6.00695944  | 0.225006479 |
| LOC648217 | -0.027992409 | 5.948725772 | 0.225056195 |
| LOC222967 | -0.01638346  | 6.117826494 | 0.225112185 |
| CYB5R4    | 0.050636297  | 7.345111516 | 0.225130996 |
| KLHDC4    | 0.058378133  | 7.305222017 | 0.225142784 |
| LOC644876 | -0.031319943 | 5.977964693 | 0.225181291 |
| CSTF1     | -0.023626934 | 6.075793512 | 0.225247204 |

## DEG.infomation

|           |              |             |             |
|-----------|--------------|-------------|-------------|
| BAT2D1    | -0.05254021  | 8.540937283 | 0.225249644 |
| LOC650254 | 0.033026298  | 6.007892264 | 0.225255742 |
| LOC653829 | -0.067102618 | 7.040077769 | 0.225285076 |
| SF1       | 0.03284484   | 6.617909392 | 0.225292514 |
| REEP2     | -0.058457357 | 6.461759682 | 0.225312978 |
| FLJ42177  | -0.028992268 | 6.154112105 | 0.225348237 |
| AMBP      | -0.037704552 | 6.248126414 | 0.225406008 |
| NME2P1    | 0.031164992  | 6.130058308 | 0.225419111 |
| TRH       | -0.031733908 | 6.129954727 | 0.225491854 |
| PLVAP     | -0.081182669 | 6.691385267 | 0.225583953 |
| TMEM199   | 0.051098164  | 7.307532448 | 0.225677955 |
| LOC648210 | -0.071962405 | 10.63751542 | 0.225678639 |
| HEMGN     | 0.016780393  | 5.977322672 | 0.225727832 |
| LOC441208 | 0.063775511  | 6.505880144 | 0.225782963 |
| L3MBTL4   | 0.029418184  | 5.98682448  | 0.225867623 |
| LOC731999 | -0.034788428 | 6.486298195 | 0.225933264 |
| UGT2B7    | -0.159418916 | 7.002775749 | 0.225967946 |
| GLT1D1    | 0.051669368  | 6.029655145 | 0.226029568 |
| TNPO2     | -0.051886114 | 9.493459615 | 0.226062452 |
| LOC652838 | -0.030673433 | 6.097631172 | 0.226261291 |
| LOC653618 | 0.030053956  | 6.025917931 | 0.226431143 |
| LOC654192 | 0.04419722   | 6.182398649 | 0.226433904 |
| KIF11     | 0.025626945  | 6.221890599 | 0.226688116 |
| LOC647474 | 0.024581091  | 6.293332195 | 0.226746092 |
| SMPD1     | 0.041056779  | 7.02355902  | 0.22674733  |
| ARHGDIG   | 0.049039993  | 6.551881674 | 0.226767766 |
| LOC221710 | -0.035655874 | 6.58734762  | 0.226853163 |
| LOC348840 | 0.056903633  | 6.088349881 | 0.226891616 |
| BAIAP3    | 0.034555548  | 5.995869611 | 0.226955789 |
| LOC646554 | 0.035436238  | 5.962601901 | 0.226970461 |
| LOC653641 | 0.022671334  | 6.063754173 | 0.227162239 |
| LOC643341 | -0.026767995 | 6.094126574 | 0.2271651   |
| OR4C46    | 0.03295023   | 6.13289819  | 0.227253886 |
| PROKR2    | 0.02958123   | 6.023534272 | 0.227282822 |
| LOC729786 | 0.03307912   | 6.027846374 | 0.227326378 |
| LOC401252 | 0.02942685   | 6.100163359 | 0.227420448 |
| LOC650235 | -0.029652435 | 6.182628987 | 0.227478341 |
| LOC401101 | 0.031542158  | 5.963587318 | 0.227603998 |
| PRIM2     | 0.049230993  | 6.356454005 | 0.227674822 |
| ACY3      | 0.028127675  | 5.943310308 | 0.227737491 |
| NCSTN     | -0.064584021 | 10.44905318 | 0.227861763 |
| IDE       | 0.054060305  | 7.334140155 | 0.227899338 |
| DCUN1D4   | -0.043420479 | 8.0928765   | 0.227964238 |
| LOC388503 | 0.018546388  | 6.070392088 | 0.228066874 |
| PRH2      | 0.03027919   | 6.117517935 | 0.228099211 |
| CD300E    | 0.030839622  | 6.164690435 | 0.228101271 |
| ZCCHC11   | 0.043826379  | 7.324582104 | 0.228103353 |
| LOC442388 | 0.025736375  | 6.074179099 | 0.2281619   |
| LOC653576 | -0.024954683 | 6.033345723 | 0.228266486 |
| C3ORF31   | -0.062357553 | 8.51560889  | 0.228269684 |
| LOC651231 | -0.03046324  | 6.072170177 | 0.22830383  |

## DEG.infomation

|           |              |             |             |
|-----------|--------------|-------------|-------------|
| KIR2DL4   | -0.020777516 | 6.100791678 | 0.228322463 |
| OCA2      | 0.033752033  | 5.945681934 | 0.228336748 |
| CYORF15A  | 0.13365786   | 6.800999246 | 0.228450987 |
| OR7D2     | 0.042201119  | 6.014870578 | 0.228592134 |
| LOC644452 | 0.033186466  | 6.160671736 | 0.228597026 |
| ANKRD35   | -0.044699852 | 6.765581524 | 0.228603124 |
| FAM90A1   | -0.038321665 | 6.052543807 | 0.228625395 |
| C16ORF46  | -0.030730347 | 6.088106168 | 0.228701347 |
| ERCC8     | 0.020155223  | 6.270963685 | 0.228727664 |
| LOC651007 | -0.027204896 | 6.258370257 | 0.228791104 |
| CD81      | -0.041618289 | 13.89679794 | 0.228891871 |
| GATAD1    | 0.038048993  | 6.882573036 | 0.228973794 |
| LOC653507 | 0.02836323   | 5.939331869 | 0.229037464 |
| TCHH      | 0.032079199  | 6.427434381 | 0.229053263 |
| C8ORF46   | -0.052022386 | 6.504155303 | 0.229138506 |
| LOC643937 | 0.033853415  | 6.28815074  | 0.229153657 |
| XKR4      | -0.059245039 | 6.430852775 | 0.229167008 |
| LOC642767 | 0.026975481  | 5.98825523  | 0.229176456 |
| LOC649060 | 0.029320982  | 6.038776782 | 0.229296495 |
| LOC654254 | -0.033602537 | 6.087568394 | 0.229321393 |
| LOC646926 | 0.028153135  | 6.095527707 | 0.229422409 |
| FGF5      | -0.022601279 | 6.168264976 | 0.229447552 |
| LEKR1     | 0.029667676  | 6.270310027 | 0.229484078 |
| FAM44A    | 0.03299164   | 6.025136294 | 0.229500115 |
| LOC642592 | 0.028241368  | 6.003723461 | 0.229555508 |
| AKAP2     | -0.050651764 | 6.567316412 | 0.229594352 |
| LOC651150 | 0.027070629  | 6.088935847 | 0.229656354 |
| BTBD11    | -0.018516891 | 6.131308752 | 0.229781913 |
| GNG10     | 0.078462355  | 7.894342976 | 0.229784616 |
| A26C3     | -0.019651676 | 6.177860508 | 0.229923807 |
| LOC643808 | 0.035104914  | 5.932997093 | 0.229961656 |
| CDC23     | 0.04983878   | 8.565214057 | 0.229976614 |
| SUMF2     | -0.052104604 | 8.925805614 | 0.230051653 |
| TFDP1     | -0.041306022 | 9.044652528 | 0.230053542 |
| LOC641996 | -0.034584577 | 6.314824569 | 0.230085603 |
| LOC646627 | -0.021491782 | 6.003363089 | 0.230120822 |
| PARC      | 0.061369869  | 6.335784808 | 0.230122747 |
| SPRR2C    | 0.031268787  | 5.972872654 | 0.230180354 |
| SLC28A1   | 0.025380275  | 6.089678249 | 0.230337728 |
| BCCIP     | -0.056505792 | 8.464223279 | 0.230415946 |
| LOC388849 | -0.01896026  | 6.051717514 | 0.230431023 |
| TMPRSS11D | -0.034634352 | 6.0589092   | 0.230526324 |
| LOC644360 | 0.043779989  | 6.086328575 | 0.230532887 |
| C22ORF23  | 0.03238903   | 6.62179801  | 0.23053412  |
| LOC644003 | -0.029506785 | 6.058205466 | 0.230643129 |
| CERKL     | -0.016010589 | 5.949687755 | 0.23072533  |
| RFT1      | -0.037723423 | 6.201617909 | 0.230883796 |
| TAF12     | 0.047784978  | 7.939751157 | 0.230894592 |
| SLC25A34  | 0.135069306  | 7.700623053 | 0.23101362  |
| F9        | 0.030963984  | 6.204600038 | 0.231018558 |
| ARID2     | 0.037687118  | 6.896837222 | 0.231084785 |



## DEG.infomation

|           |              |             |             |
|-----------|--------------|-------------|-------------|
| KIAA1530  | 0.027041612  | 6.555063203 | 0.231130564 |
| PCAF      | 0.058334496  | 6.390759027 | 0.231145923 |
| PYDC1     | 0.030100155  | 6.056120524 | 0.231220629 |
| LOC339674 | -0.019891097 | 6.031555526 | 0.231230982 |
| LOC641365 | 0.042627249  | 6.286489459 | 0.231256161 |
| PPP1R2P3  | 0.032207768  | 6.001535155 | 0.231258898 |
| TRAM2     | -0.053921633 | 7.655932455 | 0.231307888 |
| LOC644884 | 0.031371353  | 6.190408616 | 0.231390181 |
| C4ORF23   | 0.031515622  | 6.496788895 | 0.231403357 |
| C1ORF129  | -0.034221065 | 6.171028888 | 0.231451001 |
| FAM81B    | 0.036677358  | 6.130029063 | 0.231531708 |
| LOC285768 | 0.027792377  | 5.977975175 | 0.231571392 |
| LOC654252 | 0.029415925  | 6.107982347 | 0.231683601 |
| STX11     | -0.081695488 | 7.866780113 | 0.231746421 |
| CHD9      | 0.064299377  | 9.215730639 | 0.231781609 |
| LOC388963 | 0.027131658  | 6.062095246 | 0.231803103 |
| MRPS31    | 0.045896074  | 9.619645638 | 0.231831331 |
| SGTB      | -0.023000455 | 6.098427086 | 0.231957875 |
| LOC643949 | -0.099763523 | 8.982553817 | 0.231976307 |
| LOC402617 | -0.032588806 | 6.044861778 | 0.232007212 |
| ELMOD1    | -0.041431724 | 6.28093322  | 0.232057605 |
| COX11     | 0.046597372  | 6.807630107 | 0.232120813 |
| C19ORF35  | -0.030838001 | 6.133051442 | 0.232327328 |
| FAM83C    | 0.031304833  | 6.102880785 | 0.232474467 |
| ZNF446    | 0.041761714  | 7.095580857 | 0.232493219 |
| FLJ46300  | 0.027046208  | 6.243709999 | 0.232508598 |
| MEGF11    | -0.031977749 | 5.896926593 | 0.232656534 |
| LOC284422 | -0.026807081 | 6.05891536  | 0.23266546  |
| LOC220433 | 0.115632773  | 10.20268076 | 0.232699894 |
| WDR41     | -0.069013193 | 8.025394084 | 0.23275885  |
| ITPR1     | 0.061143384  | 7.703452121 | 0.23278168  |
| RGPD7     | 0.034515279  | 6.062759288 | 0.232861685 |
| LOC645294 | -0.029582094 | 5.932847406 | 0.232908808 |
| LOC643131 | 0.031015642  | 5.954399691 | 0.232929356 |
| LOC643070 | 0.028892391  | 6.08162571  | 0.232951399 |
| LOC728516 | -0.03094196  | 6.027273956 | 0.232976421 |
| ZNF582    | 0.044342995  | 5.996726445 | 0.233019353 |
| F2R       | -0.067218363 | 13.52518577 | 0.233050671 |
| PRAP1     | 0.031587533  | 6.125415046 | 0.233175083 |
| LOC728285 | 0.033443621  | 5.988966029 | 0.233202044 |
| LOC388915 | -0.025499423 | 5.859825811 | 0.233210705 |
| ZNF620    | 0.031416522  | 6.101486996 | 0.233231801 |
| ZNF609    | -0.040761889 | 6.653915976 | 0.233271017 |
| LOC388312 | -0.029328903 | 6.051241753 | 0.233360224 |
| LOC728811 | -0.141985781 | 6.90454516  | 0.233452471 |
| LOC647711 | 0.025395887  | 6.043628031 | 0.233471816 |
| LOC651892 | 0.026196478  | 6.170339102 | 0.23350479  |
| LOC643662 | 0.031134095  | 6.111414849 | 0.233513285 |
| CASKIN1   | -0.030159807 | 6.036346024 | 0.233582716 |
| DISP1     | 0.072453767  | 7.720210441 | 0.233630184 |
| GLT8D4    | -0.03702221  | 6.055391148 | 0.233919277 |

## DEG.infomation

|           |              |             |             |
|-----------|--------------|-------------|-------------|
| MRPL23    | -0.05847001  | 10.6533619  | 0.233938346 |
| RPS6KB1   | 0.057514089  | 8.910254448 | 0.233973413 |
| MAPK10    | 0.02013179   | 6.226719081 | 0.233993018 |
| DEFB104B  | 0.026334028  | 5.956684694 | 0.234040587 |
| UFC1      | -0.067003713 | 9.769505278 | 0.234076763 |
| CTSD      | -0.070949412 | 9.916319248 | 0.234165403 |
| LOC647208 | -0.034234237 | 5.99390704  | 0.234216167 |
| LOC642995 | 0.015327894  | 6.080200077 | 0.23435114  |
| LOC651503 | -0.032216281 | 6.241478262 | 0.234354574 |
| DDI1      | 0.049326877  | 6.115023346 | 0.234513683 |
| LOC649978 | 0.028216686  | 6.125171662 | 0.234536413 |
| CCDC35    | 0.033982579  | 6.219214667 | 0.234555648 |
| DYNC2H1   | 0.058548373  | 6.65702083  | 0.234621835 |
| C1ORF21   | 0.059244271  | 8.40692175  | 0.234661895 |
| LOC650853 | -0.031438942 | 6.345758667 | 0.23468592  |
| LOC651738 | -0.034459548 | 6.335723456 | 0.234688577 |
| LOC441205 | -0.027424313 | 5.910226957 | 0.234722234 |
| VIL1      | -0.029715485 | 5.960962412 | 0.234737809 |
| LGR5      | 0.03143318   | 6.105525685 | 0.23480032  |
| FLJ45684  | 0.027962956  | 6.017649584 | 0.234868938 |
| PDCL2     | -0.033937848 | 5.909250012 | 0.234869713 |
| DMRTA2    | -0.031448996 | 6.095899036 | 0.234922302 |
| VKORC1    | -0.05414874  | 10.13450214 | 0.234928539 |
| FMR1      | 0.032508186  | 5.959141934 | 0.234972743 |
| OR13A1    | 0.029734479  | 6.077272865 | 0.235123956 |
| MCRS1     | -0.058643932 | 9.580680341 | 0.235137995 |
| MAP4K5    | -0.038450928 | 7.256855874 | 0.235238232 |
| LOC613206 | 0.028814046  | 6.344221252 | 0.235239637 |
| OLIG2     | 0.029300145  | 6.038420813 | 0.235367587 |
| GPM6A     | 0.021323811  | 6.289654065 | 0.235395212 |
| ZNF597    | 0.03048177   | 6.263095954 | 0.235415286 |
| LOC651731 | 0.030380153  | 5.93293118  | 0.23557847  |
| LOC651202 | -0.122186277 | 9.332187896 | 0.235610717 |
| LOC729758 | 0.028137493  | 5.990193104 | 0.235665753 |
| ZNF480    | 0.07903324   | 7.409895906 | 0.235668584 |
| TCBA1     | -0.030118249 | 5.965432428 | 0.235679526 |
| SIRPB1    | -0.034575337 | 6.035364928 | 0.235681797 |
| MGC70870  | -0.032412671 | 6.091613596 | 0.235728109 |
| LOC651314 | 0.027493807  | 6.169737415 | 0.235781114 |
| LTBP1     | 0.022989102  | 6.171729861 | 0.235819343 |
| RPS6      | -0.051183551 | 12.83327295 | 0.236012604 |
| ODF3L1    | 0.032385784  | 6.179285375 | 0.236016173 |
| TMPRSS11A | -0.028830443 | 6.035301377 | 0.236032954 |
| OR9A2     | 0.028613979  | 6.128688862 | 0.236092704 |
| GPR112    | -0.037123975 | 6.060170222 | 0.236099388 |
| EXOC5     | -0.031522371 | 6.464470653 | 0.236136833 |
| LOC648041 | 0.03443389   | 6.082220633 | 0.236164162 |
| AQP2      | 0.032826594  | 6.144540342 | 0.236167079 |
| FAM126B   | 0.036176535  | 6.819958369 | 0.236232417 |
| LOC645899 | -0.075529439 | 13.14004572 | 0.236240854 |
| TMEM89    | 0.036916977  | 6.201809872 | 0.236262211 |

## DEG.infomation

|           |              |             |             |
|-----------|--------------|-------------|-------------|
| SERPIN5   | -0.033461711 | 6.11897651  | 0.236301847 |
| LOC649910 | -0.029533339 | 6.147320637 | 0.23634301  |
| CALM2     | -0.054824516 | 12.57005784 | 0.236432829 |
| HSD11B1   | -0.052004472 | 6.64502885  | 0.236485647 |
| C8ORF41   | 0.092365678  | 7.420029004 | 0.23654408  |
| UNC45A    | -0.041910794 | 7.580391012 | 0.236559363 |
| LOC389671 | -0.029007796 | 6.09654609  | 0.236602234 |
| PSMG3     | -0.041004811 | 6.994515736 | 0.236614327 |
| COG8      | -0.0320576   | 6.407999428 | 0.236679416 |
| LOC647328 | -0.033382269 | 6.408015205 | 0.236714988 |
| EIF3E     | 0.054700812  | 12.89856984 | 0.236753517 |
| DNAJC27   | 0.060544743  | 8.363006863 | 0.236766823 |
| MAK16     | -0.080593137 | 8.115058213 | 0.236929821 |
| SMG1      | -0.05345567  | 7.951123243 | 0.236948423 |
| KRTAP10-8 | -0.031737806 | 6.070663475 | 0.237069822 |
| HBG1      | -0.067100794 | 6.242704536 | 0.237093347 |
| LOC648943 | 0.02643358   | 6.059327765 | 0.23722734  |
| C4ORF17   | -0.028603212 | 5.977044691 | 0.237302306 |
| PTPRG     | -0.072478695 | 6.698280123 | 0.237369325 |
| KIAA0317  | 0.028588144  | 6.024934411 | 0.237539565 |
| LOC440706 | 0.038169818  | 5.997056494 | 0.237580629 |
| CCL20     | -0.055464671 | 6.106477091 | 0.237581529 |
| ANKRD13C  | -0.041417625 | 6.985558789 | 0.23779541  |
| PARG      | 0.025182273  | 6.271990995 | 0.237817471 |
| LOC642987 | 0.028805567  | 6.090696742 | 0.237870171 |
| XAGE1B    | 0.020647522  | 6.064392802 | 0.237890884 |
| HS3ST3B1  | 0.02935955   | 6.204251437 | 0.237900397 |
| LOC388900 | -0.029138496 | 5.917330713 | 0.237928524 |
| SELO      | -0.043031641 | 8.079986323 | 0.23794924  |
| TMEM161B  | 0.055683855  | 6.113768605 | 0.238143313 |
| PTPN7     | -0.023670894 | 6.188122867 | 0.238167274 |
| C1ORF141  | 0.020736996  | 6.014833678 | 0.2382148   |
| LOC441870 | 0.029267326  | 5.999238121 | 0.238250293 |
| PIGQ      | -0.064261777 | 7.847718207 | 0.23825594  |
| LOC646279 | 0.026645919  | 6.062329301 | 0.238272947 |
| LOC113386 | 0.082351974  | 7.755541822 | 0.238307321 |
| UBXD6     | -0.041605556 | 6.249971327 | 0.238321347 |
| C22ORF33  | 0.049936918  | 6.194294386 | 0.238355466 |
| RPL38     | -0.051718365 | 13.63701482 | 0.238506318 |
| GJA9      | 0.036379915  | 6.107288884 | 0.23851458  |
| CDIPT     | 0.063682362  | 6.569308263 | 0.238578291 |
| CHAF1A    | 0.033591237  | 6.278419984 | 0.238793347 |
| CLDN12    | -0.059772589 | 8.360768498 | 0.238805023 |
| DNHL1     | 0.02803968   | 6.232829743 | 0.238960686 |
| LOC440577 | -0.027046329 | 6.265578972 | 0.238967912 |
| BTN3A3    | -0.049092693 | 6.822190245 | 0.238994922 |
| HIT-40    | 0.030371586  | 6.165289591 | 0.239127274 |
| ANXA13    | 0.01757216   | 6.001043077 | 0.2391792   |
| SOX1      | -0.03013525  | 5.942711432 | 0.23921118  |
| MGC33407  | 0.027812638  | 5.956060323 | 0.239312891 |
| GPR37L1   | -0.031402002 | 5.960477645 | 0.23934425  |

## DEG.infomation

|           |              |             |             |
|-----------|--------------|-------------|-------------|
| LOC645686 | 0.028335397  | 5.991812541 | 0.239431086 |
| LOC389787 | 0.106189751  | 12.73084757 | 0.239451735 |
| ADAM20    | 0.034270604  | 5.966519047 | 0.239516389 |
| CSTA      | -0.027253534 | 6.022754583 | 0.239550572 |
| LOC400713 | 0.051057818  | 6.830760488 | 0.239563364 |
| ZBTB41    | 0.04667833   | 6.441890123 | 0.239591497 |
| RAPGEF6   | 0.043706581  | 7.162232787 | 0.239638047 |
| LOC643350 | 0.029805163  | 5.977794742 | 0.239652997 |
| LOC653146 | -0.029833944 | 6.068153313 | 0.239672764 |
| HDAC11    | -0.056292497 | 6.556557705 | 0.239782268 |
| LOC389842 | 0.032067891  | 6.236485658 | 0.239800965 |
| LOC651848 | -0.028523771 | 6.099128105 | 0.239898317 |
| LOC645576 | -0.027496071 | 6.014893894 | 0.239931472 |
| HIST1H2BA | -0.027010717 | 5.962314386 | 0.23995239  |
| UBL4B     | 0.028567654  | 6.059231987 | 0.240158832 |
| LOC390561 | -0.030782911 | 6.027377885 | 0.2401777   |
| KCNH1     | 0.02170137   | 5.995669916 | 0.240182251 |
| LOC647089 | 0.036111234  | 6.113274989 | 0.240208062 |
| NME6      | 0.037433746  | 7.232565604 | 0.240253512 |
| KRTAP19-2 | 0.027022023  | 5.952053155 | 0.2403943   |
| LOC650599 | 0.033420228  | 6.088148348 | 0.240419937 |
| OCEL1     | -0.0684195   | 8.299893145 | 0.240523065 |
| LOC402562 | 0.031425071  | 5.991690243 | 0.240590281 |
| LOC652111 | 0.027515092  | 6.153131362 | 0.2406074   |
| ZMAT5     | 0.034719474  | 7.346012649 | 0.240763541 |
| C21ORF86  | -0.024718827 | 6.043537011 | 0.240801387 |
| DAZ1      | 0.032632346  | 6.022627361 | 0.240856743 |
| GJA8      | -0.028757788 | 6.131501683 | 0.240887835 |
| CABYR     | 0.023610725  | 6.04726909  | 0.241042959 |
| ZNF556    | 0.04621916   | 6.074133898 | 0.241066993 |
| IL5       | -0.022037849 | 6.089090874 | 0.241123827 |
| LOC648392 | 0.028238131  | 6.100610872 | 0.241126387 |
| RTEL1     | -0.024784754 | 6.169163018 | 0.241155566 |
| ZNF223    | -0.093837762 | 8.594910686 | 0.241162445 |
| KLHDC3    | -0.072542045 | 10.25674973 | 0.241174712 |
| FLJ30058  | -0.050878029 | 7.344691247 | 0.241180971 |
| TAF3      | 0.020027318  | 6.197911873 | 0.241186789 |
| DYNC111   | 0.086733299  | 8.753270164 | 0.241211528 |
| LOC644652 | -0.02642908  | 6.187075451 | 0.241221706 |
| IGF2AS    | 0.040249624  | 5.943183058 | 0.241297665 |
| LOC646010 | -0.028471626 | 6.055896276 | 0.241302485 |
| KIAA1666  | -0.021626156 | 6.308675757 | 0.241349207 |
| TMPRSS11B | -0.029416567 | 5.985449698 | 0.241357451 |
| IL22      | 0.018598489  | 6.027951237 | 0.241386611 |
| LOC653037 | 0.034886979  | 6.082308305 | 0.241424797 |
| GPR6      | 0.025070172  | 6.154639669 | 0.241493659 |
| LOC648590 | 0.0269625    | 6.143224786 | 0.241538664 |
| C12ORF71  | -0.028816334 | 6.134697817 | 0.241552381 |
| LOC645012 | -0.026708439 | 5.909658005 | 0.241800256 |
| LOC651102 | -0.034962812 | 5.982245453 | 0.241926539 |
| LOC440995 | 0.031927866  | 6.103837112 | 0.241943133 |

## DEG.infomation

|                 |              |             |             |
|-----------------|--------------|-------------|-------------|
| LOC650712       | -0.030159486 | 6.000009215 | 0.241984733 |
| LOC646675       | -0.117382962 | 8.622241535 | 0.242057159 |
| LOC646198       | 0.031880356  | 5.918023121 | 0.242078483 |
| KIAA1922        | 0.029124672  | 6.072438591 | 0.242135802 |
| KRT73           | 0.028559705  | 6.05404299  | 0.242138577 |
| C1ORF172        | 0.026990374  | 6.102524909 | 0.242162384 |
| FLJ43582        | 0.027393892  | 6.081259857 | 0.242220387 |
| LOC387873       | -0.030029664 | 6.055241746 | 0.242285956 |
| ATXN8OS         | -0.027358456 | 5.982080928 | 0.24234747  |
| SLC5A11         | -0.027897809 | 6.037472873 | 0.24238183  |
| UGT2A1          | 0.020822083  | 6.029329175 | 0.242456442 |
| LOC645363       | -0.029225726 | 5.970476383 | 0.242485402 |
| LOC649428       | -0.033330023 | 5.925291603 | 0.242542891 |
| DOK1            | -0.044111482 | 6.075550304 | 0.242748101 |
| APPBP2          | 0.039330074  | 8.046474403 | 0.242861315 |
| LOC389830       | 0.028140732  | 6.057803493 | 0.243012771 |
| LOC730130       | 0.030526462  | 6.128004019 | 0.243057255 |
| C16ORF5         | 0.035554765  | 6.457399362 | 0.243122758 |
| SLIC1           | -0.033325657 | 6.0089616   | 0.243139032 |
| METT11D1        | 0.036831739  | 7.732187223 | 0.243259879 |
| PHF19           | 0.026282203  | 6.71042683  | 0.243309243 |
| LOC642629       | 0.026283263  | 5.930516948 | 0.243359487 |
| LOC402483       | 0.042275733  | 6.086450541 | 0.243394922 |
| TFAMP1          | -0.02819509  | 6.024873669 | 0.243461235 |
| LOC652200       | -0.027463891 | 5.916292327 | 0.243502515 |
| PRKCG           | 0.02870379   | 6.150864785 | 0.243535659 |
| BDP1            | -0.030540906 | 6.256106441 | 0.243581721 |
| TGOLN2          | -0.071037783 | 10.07730686 | 0.243614781 |
| LOC653533       | -0.031481818 | 6.082785096 | 0.243692799 |
| TNFSF12-TNFSF13 | 0.03221405   | 6.428104804 | 0.243745557 |
| SNRPD1          | -0.039455382 | 6.775167801 | 0.243840098 |
| LOC389641       | -0.025610853 | 6.068227044 | 0.243875722 |
| CPSF3           | 0.048737088  | 8.933942462 | 0.243949183 |
| KIR3DX1         | -0.030782954 | 6.071657721 | 0.244039393 |
| FBXL21          | 0.033720343  | 6.219798194 | 0.244087482 |
| KIAA0514        | 0.020911103  | 5.952415168 | 0.244095248 |
| LOC651430       | -0.02997829  | 6.077212752 | 0.244102592 |
| IFNA17          | 0.029312007  | 5.89182929  | 0.244123992 |
| PRR3            | 0.042551731  | 6.288406629 | 0.244164302 |
| AGAP1           | -0.021349087 | 6.053535248 | 0.24422952  |
| KRT86           | -0.029212508 | 6.003886421 | 0.24423799  |
| PBRM1           | 0.025464124  | 6.737488114 | 0.244291805 |
| FLJ90650        | -0.030281961 | 6.065345317 | 0.244436532 |
| ACSM5           | 0.047005349  | 6.293973762 | 0.244468156 |
| LOC644468       | 0.037691681  | 5.941325219 | 0.244757549 |
| FAM174B         | -0.069734718 | 7.907566827 | 0.244866517 |
| CHURC1          | 0.214676465  | 9.767410767 | 0.244939052 |
| LOC643770       | -0.026838368 | 5.991143213 | 0.245064122 |
| CYLC1           | -0.02029372  | 6.132000133 | 0.245126291 |
| LOC651728       | 0.031519734  | 5.953002072 | 0.245279753 |
| STCH            | -0.048085086 | 6.503676963 | 0.245344716 |

## DEG.infomation

|           |              |             |             |
|-----------|--------------|-------------|-------------|
| LOC442020 | 0.031334815  | 6.033335899 | 0.245386281 |
| PLCXD2    | 0.035019499  | 5.893251076 | 0.245458474 |
| FAM128A   | -0.045659819 | 6.077047975 | 0.245481916 |
| DMWD      | -0.082203795 | 7.205122317 | 0.245492548 |
| ATF7      | -0.031247799 | 6.184267272 | 0.245582005 |
| SLC2A4RG  | 0.035097466  | 7.43280923  | 0.245624535 |
| APLNR     | 0.120432951  | 8.807117497 | 0.245639831 |
| LOC729602 | -0.034593583 | 6.193187435 | 0.245659286 |
| MGC33894  | 0.027084967  | 5.962468136 | 0.245735138 |
| AADACL3   | 0.025174267  | 6.029658549 | 0.245763002 |
| CPNE7     | -0.015313358 | 6.023033619 | 0.245840896 |
| GRIN2C    | -0.038951394 | 6.2878217   | 0.245869196 |
| WHDC1L2   | 0.016777784  | 6.13046345  | 0.245901165 |
| MGC42105  | -0.034876789 | 6.096328429 | 0.245973716 |
| RAP2B     | 0.022648842  | 6.139759572 | 0.246005964 |
| SCML4     | -0.025667117 | 5.949988469 | 0.246247222 |
| LOC124216 | -0.028936941 | 6.165741374 | 0.246473581 |
| LOC728183 | -0.02801233  | 5.995805619 | 0.246819675 |
| LOC149224 | -0.029807447 | 6.058155076 | 0.246882576 |
| CATSPER1  | -0.032288076 | 6.013858872 | 0.246894621 |
| LIX1      | 0.031627761  | 6.168433024 | 0.247002881 |
| RNF212    | 0.031740018  | 6.131243256 | 0.247008611 |
| GNG3      | 0.039623641  | 6.035774825 | 0.247093469 |
| GMNN      | -0.05148903  | 6.881425351 | 0.247111927 |
| IL23R     | 0.020626092  | 5.973240169 | 0.247134113 |
| NPAL3     | 0.058188553  | 8.369536858 | 0.247179739 |
| CD28      | -0.032024757 | 6.132559605 | 0.247282328 |
| TOMM22    | 0.071050269  | 9.105884906 | 0.24730302  |
| ACAA1     | 0.069824401  | 9.358002312 | 0.247359038 |
| CCDC88B   | 0.032359061  | 6.39995224  | 0.247397621 |
| SNW1      | 0.050255257  | 7.077527328 | 0.247415372 |
| LOC652288 | -0.028952233 | 5.913301263 | 0.247465983 |
| LOC401410 | 0.031992082  | 5.988028284 | 0.247501684 |
| LOC650314 | -0.031268624 | 5.971190737 | 0.247664025 |
| SLC39A4   | -0.023815171 | 6.19025159  | 0.247708149 |
| USH1G     | 0.03503253   | 6.433733792 | 0.247722881 |
| LOC644558 | 0.030749441  | 6.209704962 | 0.247769447 |
| C20ORF133 | 0.028214573  | 6.134110435 | 0.247773473 |
| RNF180    | 0.029951751  | 6.405025627 | 0.247815657 |
| KCNA1     | 0.028475426  | 5.976944309 | 0.247938325 |
| PGAM2     | -0.107309468 | 10.79829578 | 0.247951443 |
| MYEOV2    | -0.033516494 | 6.126718005 | 0.248037521 |
| MORN5     | -0.030568307 | 5.947092076 | 0.248085011 |
| LOC653325 | -0.029340787 | 6.248246883 | 0.248085479 |
| LOC642433 | -0.028282461 | 6.012912323 | 0.248252246 |
| CLDN2     | 0.028245504  | 6.067068709 | 0.24835342  |
| PRDM9     | 0.021718236  | 6.338108784 | 0.24857266  |
| MTRR      | -0.058118429 | 7.501226463 | 0.248751818 |
| SLC2A5    | -0.111343182 | 7.262612589 | 0.248895186 |
| TRIT1     | -0.06653424  | 8.418300526 | 0.248936894 |
| PRB4      | -0.029799019 | 6.082253633 | 0.248942331 |

## DEG.infomation

|           |              |             |             |
|-----------|--------------|-------------|-------------|
| LOC653962 | 0.05014666   | 5.933351707 | 0.248957353 |
| LOC651272 | 0.027728463  | 6.069945283 | 0.249010964 |
| LOC652127 | 0.030326319  | 5.941715324 | 0.249088683 |
| RAET1E    | 0.022642665  | 6.146368593 | 0.249171632 |
| USH2A     | 0.014798157  | 6.127975276 | 0.249214608 |
| VAX1      | 0.030379894  | 6.006550314 | 0.249245293 |
| LOC653280 | -0.027798613 | 6.053030311 | 0.24925184  |
| SSTR4     | -0.027769548 | 6.031644477 | 0.249267161 |
| LOC345630 | -0.031437908 | 6.035186314 | 0.249532755 |
| GTPBP1    | -0.029309566 | 6.337698355 | 0.249600319 |
| VCX3A     | 0.020684527  | 6.160216703 | 0.249747255 |
| DUXA      | -0.033656874 | 5.950470964 | 0.249914746 |
| LOC441251 | 0.036438114  | 6.230620499 | 0.249922126 |
| LOC646491 | -0.032191473 | 6.458007807 | 0.249946082 |
| C19ORF66  | -0.052071935 | 7.138885522 | 0.24996088  |
| TFAP2C    | -0.022929302 | 6.046807411 | 0.25008932  |
| SNAPC1    | -0.053157858 | 7.580155786 | 0.25009256  |
| HPR       | 0.157756242  | 8.503642292 | 0.250226553 |
| LOC652850 | 0.02980879   | 6.107770076 | 0.250327966 |
| MIA2      | -0.022113519 | 5.949622329 | 0.250435558 |
| LOC645992 | 0.02699449   | 5.934662682 | 0.250458249 |
| LOC728621 | 0.026615739  | 5.945130093 | 0.25056915  |
| XKRX      | 0.029893046  | 6.017982543 | 0.250690908 |
| RAD1      | -0.039221152 | 6.511284342 | 0.250763548 |
| ADAM30    | 0.028734044  | 6.026291795 | 0.250778749 |
| C16ORF3   | -0.033017723 | 6.160972871 | 0.250857852 |
| LOC649317 | 0.023657471  | 5.972175531 | 0.250885504 |
| COL24A1   | 0.046616406  | 6.400785471 | 0.251003476 |
| PTPRS     | -0.027339549 | 6.244910626 | 0.251015532 |
| LOC649956 | 0.027272773  | 6.145067962 | 0.251052771 |
| TMEM202   | -0.02113591  | 6.142447418 | 0.251149796 |
| DHDDS     | 0.040845226  | 7.555146953 | 0.251199079 |
| LOC644399 | 0.049537905  | 6.153159171 | 0.251298973 |
| LOC645869 | 0.03090405   | 6.00415166  | 0.251346605 |
| HOXC13    | 0.036988312  | 6.157984783 | 0.251347707 |
| MGC27121  | -0.031010777 | 6.106942173 | 0.251393475 |
| ANXA10    | 0.027744129  | 5.977629413 | 0.251411385 |
| CD6       | 0.036196998  | 6.266162749 | 0.251488432 |
| LOC388720 | -0.039547176 | 14.30609134 | 0.251504548 |
| LOC116412 | -0.021755908 | 6.112100908 | 0.251610373 |
| LOC642730 | 0.037950687  | 6.002587392 | 0.251611749 |
| HPCAL4    | -0.060624985 | 6.067375757 | 0.251675529 |
| PCDHB10   | 0.02363858   | 6.054645399 | 0.251750014 |
| PFN3      | 0.044256742  | 6.034656557 | 0.251756211 |
| CYP3A5    | 0.02950029   | 6.038374653 | 0.251777398 |
| NPY2R     | 0.026850541  | 6.093803576 | 0.251802332 |
| LOC345643 | 0.030128607  | 6.136994284 | 0.25201823  |
| LOC441771 | 0.028304095  | 6.031297702 | 0.252050895 |
| RAB3D     | 0.028619685  | 6.127289241 | 0.252099333 |
| LOC641805 | 0.028179888  | 6.0184017   | 0.252140092 |
| LOC642380 | -0.023311166 | 6.200579412 | 0.252261452 |

## DEG.infomation

|            |              |             |             |
|------------|--------------|-------------|-------------|
| FAM75A2    | 0.030521197  | 5.949902443 | 0.252287644 |
| MSI2       | -0.030015236 | 7.20573458  | 0.252357443 |
| C8ORFK32   | 0.025836795  | 6.059598734 | 0.252488212 |
| LOC649948  | 0.027472352  | 6.059510009 | 0.252563883 |
| HOXD1      | 0.033657626  | 6.025707327 | 0.252705383 |
| LOC648705  | -0.036555551 | 6.147100858 | 0.25285401  |
| GRIA4      | -0.020547807 | 5.97033352  | 0.252875356 |
| LOC652513  | 0.03511052   | 6.043213555 | 0.25288889  |
| TMEM132E   | -0.03068487  | 6.025797704 | 0.25298452  |
| AK7        | -0.034850375 | 6.023721323 | 0.253065275 |
| OCLN       | -0.016153643 | 5.995464446 | 0.253095582 |
| POLR1A     | -0.030984677 | 6.158347343 | 0.253099864 |
| C9ORF31    | 0.028387399  | 5.97655735  | 0.253149417 |
| TIMM8B     | 0.073700919  | 8.322938875 | 0.253203375 |
| ZMYM5      | -0.02981349  | 6.504818399 | 0.253287053 |
| RBM11      | 0.023621293  | 6.216577702 | 0.253349956 |
| XGPY2      | -0.022492885 | 6.036644768 | 0.253419101 |
| RNF138     | -0.051020539 | 6.5562968   | 0.253507627 |
| LOC642505  | -0.029719719 | 6.123296615 | 0.25354062  |
| CUZD1      | 0.026755095  | 6.167208876 | 0.253545301 |
| GRAMD2     | -0.033010483 | 5.989455978 | 0.253602681 |
| ANKRD33    | -0.072506017 | 9.393710437 | 0.253745423 |
| LOC650261  | 0.029571047  | 6.075275733 | 0.253770473 |
| RTP3       | 0.038800891  | 5.895252821 | 0.253775048 |
| KRTAP4-3   | 0.026772442  | 5.999137265 | 0.253861849 |
| LOC389901  | 0.044591815  | 6.644855066 | 0.253882233 |
| LOC642961  | 0.028901269  | 5.970363993 | 0.2539471   |
| CLU        | 0.018355028  | 5.983766402 | 0.253956833 |
| LOC646997  | 0.027731116  | 5.986112439 | 0.253965422 |
| ERVK6      | 0.028798448  | 6.039047004 | 0.254037778 |
| HMCN1      | 0.037925249  | 6.177563664 | 0.254074224 |
| FAM38B     | 0.036473631  | 6.28065668  | 0.254126938 |
| LOC283755  | -0.017985169 | 6.022191682 | 0.254190437 |
| C8ORF15    | 0.026845771  | 6.181026467 | 0.254256677 |
| KDR        | 0.035188434  | 6.480697306 | 0.254286189 |
| UGT3A2     | -0.027610049 | 5.957077535 | 0.254395353 |
| LOC650311  | -0.034429746 | 5.96697672  | 0.254443205 |
| NDUFAB1    | -0.080202271 | 13.1004843  | 0.254518488 |
| LOC643953  | 0.027064333  | 5.986600918 | 0.25457508  |
| SLC45A1    | -0.022009546 | 6.253435914 | 0.254663592 |
| KCNJ10     | 0.033805271  | 6.473665169 | 0.254720943 |
| RAD51AP2   | 0.031215611  | 6.114204825 | 0.254736069 |
| C9ORF153   | 0.02835046   | 5.977747777 | 0.254763377 |
| GADD45GIP1 | -0.040625027 | 6.496890162 | 0.254777823 |
| REM1       | -0.051944691 | 6.938299392 | 0.254863606 |
| KERA       | 0.02028018   | 6.126942318 | 0.254864451 |
| LOC652369  | -0.033231935 | 5.944401516 | 0.2548855   |
| LOC644477  | 0.041429665  | 6.008777499 | 0.254912463 |
| TTC39B     | -0.020092762 | 6.054698689 | 0.254951303 |
| LOC652819  | -0.029044667 | 6.038653512 | 0.254968155 |
| LOC646334  | -0.032373184 | 6.160409934 | 0.254990008 |



## DEG.infomation

|           |              |             |             |
|-----------|--------------|-------------|-------------|
| INE1      | -0.030300844 | 5.967280737 | 0.255007484 |
| LOC440352 | 0.028991554  | 6.316625541 | 0.255041805 |
| LOC651125 | -0.032861892 | 6.061095772 | 0.255074519 |
| LOC728095 | 0.025297158  | 6.063222223 | 0.255082662 |
| FUZ       | -0.044406336 | 6.765803295 | 0.255093856 |
| LOC642583 | 0.030457907  | 6.032942264 | 0.255154225 |
| FLJ35848  | -0.020864553 | 6.027625607 | 0.255171422 |
| RARRES2   | -0.089263136 | 7.521072667 | 0.255193673 |
| LOC653324 | 0.056195838  | 6.393404169 | 0.255327109 |
| LOC392197 | -0.029938136 | 6.021463426 | 0.255336891 |
| LOC649091 | 0.026839036  | 6.082663431 | 0.255354944 |
| SSTR2     | -0.083653056 | 8.052701382 | 0.255372969 |
| C4ORF21   | 0.026467401  | 5.975617195 | 0.255406136 |
| RKHD1     | -0.029159801 | 5.929452415 | 0.255503862 |
| TARS      | 0.06995002   | 9.022196438 | 0.255507521 |
| LOC650543 | -0.02567671  | 6.09061098  | 0.255536022 |
| MGC5139   | 0.046308303  | 6.194313374 | 0.255570932 |
| TRIM72    | 0.041852131  | 6.032185279 | 0.255665716 |
| LOC652594 | 0.032680381  | 6.033158916 | 0.255712425 |
| ZNF138    | 0.023587431  | 6.372334527 | 0.255749208 |
| LOC441617 | -0.028669363 | 5.984386417 | 0.255797323 |
| RNPEPL1   | 0.047128184  | 6.465089066 | 0.255873426 |
| COX8A     | 0.052386565  | 13.59443439 | 0.255923132 |
| LOC730194 | -0.029671476 | 5.976223392 | 0.255960295 |
| TNNI1     | 0.026675716  | 6.055966413 | 0.255967114 |
| MAG11     | 0.026049809  | 6.325306243 | 0.255971055 |
| LOC728229 | 0.029805576  | 6.24961477  | 0.256075938 |
| UNC119    | 0.054632055  | 6.557873389 | 0.2560813   |
| RPL4      | -0.062886327 | 11.83112507 | 0.256116765 |
| LOC642453 | -0.028374606 | 6.047631668 | 0.256153686 |
| LOC285444 | -0.027313185 | 6.148464175 | 0.256154569 |
| LOC728654 | 0.02737387   | 6.174425505 | 0.256208318 |
| APOBEC3A  | -0.027580999 | 5.954327329 | 0.256297283 |
| RPL35A    | 0.066570717  | 13.1843951  | 0.256299195 |
| STATH     | 0.022166467  | 6.108990331 | 0.256334664 |
| MPP5      | 0.050316721  | 7.680437811 | 0.25635214  |
| LOC642591 | -0.028832298 | 6.02421246  | 0.256426658 |
| PPARBP    | -0.048650366 | 7.178260296 | 0.256551345 |
| RPS6KL1   | 0.034061833  | 6.676388437 | 0.256583681 |
| LOC653135 | 0.019563138  | 6.119253459 | 0.256616411 |
| C1QBP     | -0.047734264 | 10.62162466 | 0.256635763 |
| ZNF586    | 0.045194658  | 7.429870587 | 0.256715086 |
| KENAE     | 0.033120955  | 6.183233752 | 0.256730798 |
| FLJ45974  | -0.027048083 | 6.07569436  | 0.256822875 |
| LY6G6D    | 0.034769212  | 6.109915079 | 0.25682994  |
| COL18A1   | -0.067602318 | 8.139626142 | 0.25683969  |
| C3ORF14   | 0.055603077  | 7.185284994 | 0.256949996 |
| LOC644767 | -0.028194055 | 5.934274961 | 0.257176099 |
| CEMP1     | 0.044396271  | 6.090600043 | 0.257201527 |
| LOC648432 | -0.025912396 | 6.120484616 | 0.257205423 |
| NFAM1     | 0.052444491  | 6.091729955 | 0.257310039 |

## DEG.infomation

|           |              |             |             |
|-----------|--------------|-------------|-------------|
| ACHE      | 0.017407636  | 6.137278138 | 0.257355077 |
| RAD9A     | 0.04198608   | 6.709892964 | 0.257358618 |
| DRD1      | -0.038694247 | 5.955876685 | 0.25748237  |
| ARHGEF10L | 0.034295068  | 6.335973394 | 0.257506373 |
| LOC342931 | -0.026557514 | 5.98246856  | 0.257609123 |
| OR1S2     | -0.018998136 | 6.065037434 | 0.25778137  |
| LOC642168 | -0.029191413 | 6.098857769 | 0.257790876 |
| SRD5A3    | -0.033463398 | 6.332682311 | 0.257872759 |
| MGC46336  | 0.028361728  | 6.082941587 | 0.257943878 |
| LOC645836 | -0.026793054 | 6.08398005  | 0.257957501 |
| LOC647748 | 0.025706396  | 6.157122882 | 0.258046094 |
| LOC649128 | -0.023725056 | 6.033417337 | 0.258052451 |
| MF12      | -0.019667867 | 6.287938612 | 0.258109281 |
| LYZL2     | -0.029743705 | 6.048836344 | 0.258133521 |
| ZAN       | 0.019772073  | 6.072629573 | 0.258260966 |
| LOC440550 | -0.025878878 | 6.019115731 | 0.25839847  |
| LOC441773 | 0.029586868  | 6.100692491 | 0.25850441  |
| TMOD3     | -0.028710409 | 6.163127701 | 0.258530791 |
| SLC10A6   | -0.029605935 | 5.901249209 | 0.258562519 |
| GFI1      | -0.029203628 | 6.036723803 | 0.258574624 |
| IFNW1     | -0.021924588 | 6.170139649 | 0.258600067 |
| IQSEC1    | -0.053343822 | 8.650992598 | 0.258609474 |
| SPATA3    | 0.021982025  | 6.104779856 | 0.25865238  |
| LOC642278 | -0.02867602  | 6.154088755 | 0.258658092 |
| LOC648253 | 0.025551906  | 6.069948835 | 0.258766272 |
| ZNF469    | -0.023959874 | 6.04314659  | 0.2590458   |
| WDR42B    | -0.026281719 | 5.887341457 | 0.259052881 |
| LOC645153 | 0.031327008  | 6.231033088 | 0.259091232 |
| RLF       | 0.058525599  | 6.910981591 | 0.259128211 |
| ZSCAN1    | 0.056422838  | 6.526226222 | 0.259142535 |
| MARVELD3  | 0.018546575  | 6.058502483 | 0.25915812  |
| LOC642608 | -0.027785618 | 6.101344729 | 0.25918939  |
| MBL2      | -0.031135093 | 5.960693502 | 0.259192484 |
| LOC649063 | -0.02450256  | 6.027233184 | 0.2592714   |
| RNF190    | -0.026686549 | 6.01496015  | 0.259304189 |
| LOC285407 | -0.026686005 | 6.261451573 | 0.259408431 |
| LOC649571 | 0.027388126  | 6.282433799 | 0.259449796 |
| LOC649800 | -0.027482835 | 5.91758142  | 0.25948272  |
| RPL19     | -0.046591981 | 12.99925502 | 0.25951705  |
| PSRC1     | -0.02016581  | 6.215674565 | 0.259530131 |
| FIGLA     | -0.028810794 | 6.102388462 | 0.259632803 |
| FAM7A3    | 0.01789125   | 6.034306273 | 0.259660125 |
| LOC644591 | 0.019434695  | 6.172049869 | 0.259672333 |
| LOC441476 | 0.032843734  | 5.99847624  | 0.259716303 |
| C21ORF29  | -0.027738323 | 6.006763653 | 0.259781635 |
| LOC647413 | -0.029089152 | 5.951564083 | 0.259785915 |
| ASAM      | -0.043231588 | 6.408609774 | 0.259845538 |
| PRMT3     | -0.087495858 | 8.77453135  | 0.259956319 |
| XAF1      | 0.07846363   | 7.918871976 | 0.260000234 |
| ADORA2A   | 0.055592375  | 6.899434949 | 0.260037211 |
| LOC653696 | 0.030400548  | 6.258583553 | 0.260047686 |

## DEG.infomation

|           |              |             |             |
|-----------|--------------|-------------|-------------|
| LOC647058 | -0.026850499 | 5.966001139 | 0.260053969 |
| VCAM1     | 0.080285945  | 7.090334712 | 0.260137199 |
| TCERG1    | 0.026832655  | 7.397466905 | 0.26014704  |
| LOC642981 | -0.032009837 | 6.296124864 | 0.260199951 |
| ZFYVE27   | 0.03623565   | 6.312486968 | 0.260227779 |
| LOC646399 | -0.03354265  | 6.170557816 | 0.260263721 |
| DEFB134   | -0.031857926 | 5.979543495 | 0.260281676 |
| LOC285697 | -0.022807421 | 6.115404564 | 0.260359876 |
| LOC648257 | -0.026540285 | 5.913557875 | 0.26041595  |
| SFXN3     | -0.038818732 | 6.266558365 | 0.260423926 |
| THEM2     | 0.072613231  | 9.807610415 | 0.260523461 |
| BTNL8     | -0.021511479 | 5.888070578 | 0.260528277 |
| OR13J1    | -0.027084296 | 6.012712448 | 0.260553005 |
| LOC440030 | 0.029779285  | 6.133098376 | 0.260560006 |
| COL4A1    | -0.118379231 | 10.9102459  | 0.260677383 |
| PI16      | 0.15673936   | 9.115933402 | 0.26070566  |
| HOOK3     | -0.029967638 | 6.522537687 | 0.260836708 |
| MTSS1     | -0.071299102 | 8.371990936 | 0.260849541 |
| NRF1      | -0.016764482 | 6.072350511 | 0.260867401 |
| FLJ44653  | 0.027979304  | 6.098737262 | 0.261023412 |
| ACADS     | -0.064660682 | 8.511004473 | 0.261047381 |
| LOC646439 | 0.031368145  | 6.099711922 | 0.261060935 |
| LOC730302 | 0.028305459  | 6.122277965 | 0.261112459 |
| PLEKHG4   | 0.032723249  | 6.158220072 | 0.261230985 |
| MAN2A2    | -0.059292277 | 7.299887332 | 0.261237896 |
| OSBPL10   | 0.051779523  | 6.93183873  | 0.261460302 |
| DUX4      | -0.024910715 | 5.969551282 | 0.261461619 |
| FLJ39739  | -0.013789016 | 6.036866474 | 0.26150756  |
| POGZ      | -0.025137558 | 6.51808496  | 0.261621085 |
| CYP27B1   | -0.031297932 | 6.091795739 | 0.261670621 |
| LOC643700 | 0.028249193  | 6.006010335 | 0.261746575 |
| SLC9A3R2  | -0.077625221 | 6.833076415 | 0.26188143  |
| SLC1A6    | 0.033516032  | 5.929203387 | 0.261887528 |
| LOC642428 | 0.027935559  | 6.065328768 | 0.261955658 |
| LOC653852 | -0.027919022 | 5.936336053 | 0.261988401 |
| TMEM97    | 0.041373212  | 7.623877192 | 0.262031119 |
| LOC643943 | -0.026697592 | 5.93928219  | 0.262120734 |
| LOC647374 | -0.026036572 | 6.0393511   | 0.262144363 |
| CPSF6     | 0.028654456  | 6.414207344 | 0.262210504 |
| LOC647797 | 0.029773812  | 6.067049948 | 0.262217375 |
| CIB3      | -0.02529664  | 6.166360002 | 0.262217964 |
| MYH7      | -0.099423667 | 14.73954364 | 0.262221444 |
| LOC651319 | -0.030459422 | 5.936157729 | 0.262308073 |
| LOC643772 | -0.030233887 | 6.282002154 | 0.262358934 |
| CDH11     | -0.107732261 | 7.864259725 | 0.262386673 |
| B3GN-T6   | -0.053788954 | 5.948584519 | 0.26254643  |
| ATN1      | -0.035791119 | 6.91956435  | 0.262632795 |
| DYX1C1    | 0.016843608  | 6.005566929 | 0.26265837  |
| LOC643132 | -0.023633436 | 6.136032351 | 0.262669066 |
| CLDN11    | 0.085834294  | 7.002644476 | 0.262697181 |
| LOC650214 | 0.026268117  | 5.944374665 | 0.262698964 |

## DEG.infomation

|           |              |             |             |
|-----------|--------------|-------------|-------------|
| SLC47A2   | 0.035183014  | 5.983795456 | 0.262725753 |
| LOC649009 | -0.021635628 | 6.266804327 | 0.262736982 |
| LOC389816 | 0.017353654  | 6.011987488 | 0.262741387 |
| CST7      | -0.032690795 | 6.458773595 | 0.262757993 |
| LOC652282 | 0.025204459  | 6.098516037 | 0.262794885 |
| DKKL1     | 0.029878608  | 6.344426779 | 0.262846186 |
| GPR19     | -0.021816903 | 6.049813821 | 0.262862424 |
| LOC643930 | -0.029001232 | 5.884216512 | 0.26288418  |
| OR4C11    | 0.026181014  | 6.090499632 | 0.262920196 |
| LOC283440 | 0.028308754  | 6.103108276 | 0.26295831  |
| CTRB1     | 0.036736388  | 5.907015309 | 0.262971267 |
| LOC391656 | -0.071583037 | 11.93239973 | 0.263004013 |
| MAZ       | -0.019728005 | 6.258562098 | 0.26300459  |
| FBXL4     | -0.029287013 | 6.0183962   | 0.263021568 |
| KCNJ13    | 0.027632044  | 6.083482864 | 0.263038024 |
| C18ORF25  | 0.054236391  | 9.28408253  | 0.263039807 |
| LOC649991 | 0.029673675  | 6.132340134 | 0.263165287 |
| LOC440848 | 0.028142687  | 6.003073667 | 0.263252768 |
| STAU2     | 0.039044032  | 7.341737943 | 0.263260026 |
| ZNF322B   | 0.028903078  | 6.102619783 | 0.263373444 |
| UGT2B17   | -0.064420082 | 6.31300429  | 0.26339051  |
| TNF       | 0.038566878  | 6.23888297  | 0.263392821 |
| LOC643853 | -0.03169273  | 6.122942313 | 0.263396839 |
| LOC127099 | 0.029510766  | 6.037724875 | 0.263436072 |
| LOC441811 | -0.033068653 | 5.877045496 | 0.263604329 |
| LOC441098 | 0.03111565   | 5.949959372 | 0.263652214 |
| C1ORF194  | -0.026187508 | 5.992414801 | 0.263713469 |
| FLJ33996  | 0.02797218   | 6.274185258 | 0.263795386 |
| RHOQ      | 0.055965566  | 12.31195547 | 0.263948343 |
| PIP5K2B   | -0.079957922 | 10.1005639  | 0.26398012  |
| C2ORF60   | -0.032354634 | 6.010187249 | 0.264125938 |
| C17ORF76  | 0.026817402  | 6.14495859  | 0.264136774 |
| GPER      | 0.061072482  | 7.394168666 | 0.264177406 |
| RUNDC3A   | 0.035139101  | 5.984686341 | 0.264352951 |
| C16ORF85  | -0.027591234 | 6.004708826 | 0.264399284 |
| TMIGD2    | 0.03034691   | 5.845526374 | 0.264445426 |
| ASCC1     | -0.053855893 | 9.909768141 | 0.26448055  |
| DSG2      | 0.059005538  | 7.207133463 | 0.264605594 |
| ARNTL2    | -0.032333035 | 6.008613995 | 0.264637123 |
| FAM108B1  | -0.039727037 | 6.803996713 | 0.264682147 |
| ROBO3     | -0.037207805 | 6.674194082 | 0.264804139 |
| LOC653387 | -0.021092276 | 6.034143626 | 0.264856783 |
| DPYS      | 0.029546904  | 5.965715149 | 0.264925775 |
| FLJ41423  | -0.059763316 | 8.735164473 | 0.264937247 |
| ACPT      | 0.040819214  | 6.805462876 | 0.264948164 |
| SAMD12    | -0.033266616 | 5.95076919  | 0.265044415 |
| AP1S1     | 0.047553263  | 6.960352937 | 0.26511215  |
| CDH13     | 0.089387237  | 9.489567269 | 0.265186797 |
| LOC652100 | 0.026630179  | 5.982446084 | 0.265205355 |
| LOC647213 | 0.022998462  | 6.000743869 | 0.265211868 |
| LOC646067 | -0.03011918  | 6.225073058 | 0.265214428 |

## DEG.infomation

|               |              |             |             |
|---------------|--------------|-------------|-------------|
| LOC648170     | -0.026524275 | 5.997931463 | 0.265236038 |
| UGT2A3        | 0.019576922  | 5.973920184 | 0.265252615 |
| CBX5          | 0.085881686  | 8.487211437 | 0.265257079 |
| NEUROD2       | -0.021026687 | 6.040992256 | 0.26527201  |
| PTPN20        | -0.023410247 | 6.062839222 | 0.265347844 |
| CLUAP1        | -0.071967597 | 12.39701655 | 0.265378956 |
| NT5E          | -0.045611559 | 7.083579816 | 0.265390071 |
| LOC646512     | 0.026451616  | 6.048654153 | 0.265426243 |
| AMICA1        | -0.04613047  | 6.687154342 | 0.265437133 |
| BRCA2         | -0.033381304 | 6.062230278 | 0.265556564 |
| LOC646299     | -0.029052329 | 6.05390827  | 0.265565842 |
| B3GALT6       | -0.054230729 | 7.648045261 | 0.265602985 |
| APOA1BP       | -0.051156123 | 10.09572868 | 0.265624369 |
| LOC51149      | 0.029518482  | 5.980692539 | 0.265670806 |
| SRPX2         | -0.100646399 | 7.530150943 | 0.265723141 |
| DKFZP781N1041 | 0.026138308  | 6.110549429 | 0.265755613 |
| LOC651530     | -0.02713154  | 6.020355632 | 0.265768691 |
| TTC29         | -0.023570058 | 6.051231481 | 0.26580776  |
| DGKK          | -0.030453377 | 5.986990376 | 0.265866398 |
| ARVCF         | 0.043213656  | 6.30843091  | 0.266089219 |
| SLC38A5       | -0.046620313 | 6.269800907 | 0.266121161 |
| LOC653316     | 0.049171447  | 6.172895506 | 0.266149768 |
| TTY6B         | -0.019422014 | 6.011660481 | 0.266152971 |
| LOC339902     | -0.02771511  | 5.978999557 | 0.266156719 |
| INPP5A        | 0.046472167  | 9.052015837 | 0.266227107 |
| LOC653577     | 0.025526196  | 6.126066729 | 0.266238946 |
| FLJ32569      | 0.020085948  | 6.096987713 | 0.266245448 |
| TMEM92        | 0.025682595  | 6.036042293 | 0.266311622 |
| TMEM121       | -0.026905009 | 6.011122461 | 0.266373305 |
| LOC151234     | -0.029840597 | 5.931569225 | 0.266450618 |
| LOC440829     | 0.037889816  | 6.269447587 | 0.26649106  |
| AR            | 0.054240766  | 6.737246872 | 0.266508414 |
| MAST1         | 0.027748819  | 5.933057753 | 0.266608728 |
| C20ORF134     | -0.025573149 | 6.010420623 | 0.266695    |
| LOC653319     | -0.020300476 | 6.154406465 | 0.266729614 |
| LOC643599     | -0.02597741  | 5.917737944 | 0.266732213 |
| CSAG3A        | -0.021256801 | 6.101089383 | 0.266733743 |
| MAPK8IP3      | -0.0483946   | 7.403782739 | 0.266792646 |
| LOC651617     | 0.025807903  | 5.976008093 | 0.266843184 |
| LOC650568     | -0.032579537 | 5.896194862 | 0.266886023 |
| LOC730118     | 0.0279174    | 6.152695602 | 0.266932221 |
| LOC729826     | 0.020336658  | 6.143574017 | 0.266936146 |
| SLC30A10      | 0.028348704  | 6.163849943 | 0.266974058 |
| ANO8          | -0.042300531 | 6.702692883 | 0.267057414 |
| SNORD22       | 0.030585343  | 6.422808744 | 0.267189547 |
| ABHD13        | 0.021022631  | 6.273211503 | 0.267286418 |
| C12ORF40      | -0.017400629 | 5.977193049 | 0.267303389 |
| CDYL          | -0.028629826 | 6.54094262  | 0.267313985 |
| FLJ45994      | 0.025465494  | 6.087170071 | 0.267425549 |
| LOC595101     | -0.029817274 | 6.265312929 | 0.267565081 |
| PPP2R2D       | -0.036538443 | 8.0639689   | 0.267577715 |

## DEG.infomation

|           |              |             |             |
|-----------|--------------|-------------|-------------|
| CTTNBP2NL | -0.033536407 | 6.5117916   | 0.267743594 |
| LOC653434 | 0.027047637  | 6.06985202  | 0.267812371 |
| LOC200810 | 0.032839443  | 6.293539647 | 0.267814834 |
| TMPRSS7   | 0.031191859  | 6.272736793 | 0.267825105 |
| IMPA1     | 0.07384902   | 9.062486149 | 0.267880932 |
| OR1E1     | -0.045345228 | 6.558178027 | 0.267886601 |
| LOC651554 | -0.031770674 | 6.033369339 | 0.268067888 |
| PITPNB    | -0.052619067 | 7.793106214 | 0.268132679 |
| ENOX1     | -0.052409107 | 5.960653202 | 0.26818447  |
| ABL2      | -0.019761888 | 6.198132272 | 0.268186655 |
| CDKAL1    | -0.037469905 | 6.574187192 | 0.26819729  |
| LOC649192 | -0.030252021 | 6.340870616 | 0.268223019 |
| KLC4      | 0.022809627  | 6.082798823 | 0.268238266 |
| KIAA1109  | 0.030572815  | 6.199230684 | 0.268379102 |
| C8ORF71   | -0.026568171 | 5.995422155 | 0.268380595 |
| PGC       | -0.029945596 | 6.004037429 | 0.268394012 |
| MEF2A     | 0.104427074  | 7.850557056 | 0.268396435 |
| FLJ21839  | -0.030909666 | 6.095344461 | 0.26846214  |
| LOC644668 | -0.033563433 | 5.949799802 | 0.268464177 |
| LOC650930 | -0.035116181 | 6.06963513  | 0.26853537  |
| LHPP      | 0.058240742  | 7.461721451 | 0.268634868 |
| ACOT2     | -0.10152194  | 8.167564282 | 0.268650935 |
| FLJ30851  | -0.020566138 | 6.150384632 | 0.268686537 |
| TBC1D21   | 0.038994934  | 6.0329113   | 0.268706257 |
| GSTA2     | 0.024441577  | 5.979665544 | 0.268745472 |
| ZNF100    | -0.021240089 | 6.025773885 | 0.268763789 |
| LOC653820 | -0.019996769 | 6.242040612 | 0.268856144 |
| PAK4      | 0.027365687  | 6.839446507 | 0.268861708 |
| CSNK2B    | -0.050939544 | 10.27231029 | 0.268895859 |
| MECP2     | 0.036611088  | 6.627129046 | 0.268947527 |
| SYNGR4    | -0.029222186 | 6.062847639 | 0.268998423 |
| LOC90120  | -0.038997184 | 6.570961086 | 0.269001642 |
| TMEM19    | 0.067295645  | 6.471577187 | 0.26904923  |
| ADK       | 0.044125423  | 7.591956702 | 0.269083567 |
| LOC728556 | 0.058298693  | 8.749447339 | 0.269165783 |
| CYP4A11   | 0.027711962  | 6.105770146 | 0.269211076 |
| LOC644734 | -0.027530611 | 6.101079921 | 0.269213965 |
| LOC731670 | -0.029360685 | 6.100774028 | 0.269256114 |
| LOC646903 | 0.032109725  | 5.908192569 | 0.269315994 |
| DPP10     | -0.020852495 | 6.011133438 | 0.269513389 |
| WNT9B     | -0.040078944 | 5.960358187 | 0.269517183 |
| ASAH3L    | 0.023853062  | 6.115693482 | 0.269519911 |
| LOC652469 | 0.028828809  | 6.040358034 | 0.269549696 |
| LOC645276 | 0.048924849  | 6.010787864 | 0.269565788 |
| LOC647309 | 0.019185514  | 6.070270233 | 0.269709281 |
| LOC652761 | 0.033801051  | 6.079145601 | 0.269731779 |
| UBFD1     | -0.050800591 | 7.666205876 | 0.269748486 |
| ODZ1      | -0.029624639 | 5.934222335 | 0.269844659 |
| LOC285588 | 0.027057882  | 6.101158744 | 0.269919559 |
| LOC645427 | -0.028917479 | 6.020308406 | 0.270052452 |
| EHBP1     | -0.042039533 | 8.441173843 | 0.270095638 |

## DEG.infomation

|           |              |             |             |
|-----------|--------------|-------------|-------------|
| KIAA1843  | -0.02945993  | 6.077162559 | 0.270134452 |
| C12ORF29  | -0.057690221 | 7.774346967 | 0.270180549 |
| MYOM3     | 0.087478085  | 11.24610606 | 0.270201249 |
| LOC727805 | 0.032141261  | 5.959608812 | 0.270277175 |
| LOC642978 | -0.023963004 | 6.077145022 | 0.270524978 |
| ATP6V1G3  | -0.021373779 | 6.058518093 | 0.270544396 |
| LOC644135 | -0.031482231 | 5.886139996 | 0.270701335 |
| LOC642503 | 0.029808991  | 6.211563248 | 0.270804787 |
| LOC645481 | -0.029538049 | 6.052291191 | 0.270830807 |
| C2ORF16   | 0.030515618  | 6.100317643 | 0.270841892 |
| LOC643582 | 0.026751114  | 5.99302184  | 0.27090393  |
| FHL2      | 0.11153978   | 12.92268411 | 0.270932744 |
| ODF1      | 0.026865208  | 6.018227478 | 0.270937029 |
| FLJ20972  | -0.026437467 | 6.042028453 | 0.27093754  |
| CEBPE     | 0.028603765  | 6.197929523 | 0.270951442 |
| LOC653423 | 0.027174558  | 6.069457505 | 0.271014099 |
| KRT27     | 0.027619349  | 6.014762986 | 0.271045516 |
| ADAMDEC1  | -0.022012487 | 6.052274301 | 0.271162171 |
| LOC653094 | -0.029831974 | 5.999442128 | 0.271266304 |
| LOC340598 | 0.025142315  | 6.14323012  | 0.271419138 |
| HLX       | 0.053157999  | 6.89758235  | 0.271490983 |
| OR7D4     | 0.027502135  | 6.06692787  | 0.271518829 |
| LOC649848 | 0.028062438  | 6.04702821  | 0.271684048 |
| LOC649908 | -0.030628173 | 5.992063632 | 0.271824617 |
| ATP5D     | -0.055851662 | 11.43932349 | 0.271849703 |
| C2ORF50   | 0.038740298  | 6.234155068 | 0.271906073 |
| ILKAP     | 0.037802305  | 7.331943194 | 0.271906761 |
| SNORA62   | -0.034195361 | 6.502604681 | 0.272244742 |
| GZMH      | 0.062816647  | 6.908836277 | 0.272356772 |
| PAGE5     | -0.018344374 | 6.037562264 | 0.272433266 |
| LHX9      | 0.022221476  | 5.96304329  | 0.272484457 |
| LOC643878 | -0.025919886 | 5.984486083 | 0.272502001 |
| TAF1L     | 0.039909025  | 6.916413824 | 0.272517683 |
| GSTCD     | 0.050986357  | 7.822770921 | 0.272583388 |
| FAM134A   | -0.034064904 | 7.154116828 | 0.272625359 |
| LINGO2    | -0.030888133 | 6.003732023 | 0.272635149 |
| TRPM5     | -0.027107782 | 5.928110662 | 0.272635967 |
| LOC650717 | 0.031681403  | 6.345171626 | 0.272648329 |
| DTX1      | -0.038981552 | 6.204925071 | 0.272787841 |
| CMA1      | -0.025403909 | 6.095250763 | 0.272809133 |
| GALR1     | -0.022824488 | 6.066004396 | 0.272905946 |
| LOC440567 | 0.078409505  | 13.48012762 | 0.273020113 |
| TBC1D3C   | -0.025318616 | 6.093247489 | 0.273048698 |
| TTY3      | 0.026073399  | 6.003311319 | 0.273075484 |
| NCBP1     | -0.036876858 | 7.744703945 | 0.273102227 |
| LOC649945 | 0.03507083   | 5.997459858 | 0.27311655  |
| LOC642411 | -0.025576906 | 6.199978611 | 0.273130445 |
| C14ORF128 | 0.03560701   | 6.429623036 | 0.273132091 |
| TDRD10    | 0.034620662  | 6.401622831 | 0.273398176 |
| LIMA1     | 0.062214881  | 7.477519879 | 0.273482553 |
| RINT1     | 0.03371061   | 7.108185797 | 0.273494048 |

## DEG.infomation

|           |              |             |             |
|-----------|--------------|-------------|-------------|
| CSPP1     | 0.036395916  | 7.164911635 | 0.273519833 |
| LOC646917 | -0.026764569 | 6.086103695 | 0.273526476 |
| LOC646162 | -0.028731772 | 5.932618284 | 0.273584272 |
| KIR2DS4   | 0.047398719  | 5.987362611 | 0.273593489 |
| LOC643559 | -0.028599346 | 6.168843354 | 0.273622378 |
| TMED7     | 0.05781315   | 9.402572646 | 0.273626486 |
| LOC652856 | -0.029402637 | 6.065740947 | 0.27378142  |
| ZNF467    | -0.06204191  | 7.532648447 | 0.273876909 |
| EXOSC6    | -0.062686068 | 8.511870207 | 0.273887727 |
| RAD18     | -0.018337196 | 6.125066916 | 0.273895055 |
| SLN       | -0.190295772 | 8.0503999   | 0.274116918 |
| LOC652647 | 0.057778083  | 6.73616906  | 0.27414004  |
| LOC642759 | 0.038994572  | 5.91955344  | 0.274162723 |
| RAB6B     | 0.073938355  | 8.993967412 | 0.27434265  |
| ACBD4     | 0.051348305  | 6.181537867 | 0.274486001 |
| LMBRD1    | 0.060089158  | 9.568955016 | 0.274553494 |
| LOC643697 | -0.022914428 | 6.08139339  | 0.274588018 |
| IAPP      | 0.036167316  | 6.299242346 | 0.274593693 |
| TRIM16    | -0.017850342 | 6.055363888 | 0.274633407 |
| LOC440895 | -0.019531938 | 6.21534035  | 0.274726935 |
| LOC220429 | 0.029447645  | 6.148418118 | 0.274753927 |
| PCDHA5    | 0.033912758  | 6.79894652  | 0.274818965 |
| MCM3      | 0.038760344  | 9.236528395 | 0.274858551 |
| LOC644157 | -0.029920534 | 5.983801256 | 0.274880679 |
| ZYG11B    | 0.059346345  | 10.61145863 | 0.274961317 |
| OR4S2     | -0.033670549 | 6.008951078 | 0.274964049 |
| PNMA6A    | 0.032618724  | 6.177696234 | 0.274998801 |
| DDHD1     | 0.0218074    | 6.060076586 | 0.275099827 |
| PAH       | -0.019094118 | 6.001592831 | 0.27523788  |
| LOC645966 | -0.026598423 | 6.223113453 | 0.2753468   |
| FLJ33708  | 0.026978838  | 5.933547174 | 0.275461895 |
| LOC645487 | -0.026860319 | 6.120680986 | 0.275604551 |
| LOC645676 | 0.018283843  | 6.163599434 | 0.275679237 |
| SLC38A9   | -0.036162613 | 6.789633528 | 0.275707515 |
| LOC728081 | -0.035888609 | 6.143748481 | 0.275746825 |
| LOC645441 | 0.01848408   | 6.027940611 | 0.27576711  |
| ZNF326    | -0.023420045 | 6.187193017 | 0.27604165  |
| HERPUD1   | -0.077570755 | 9.623160158 | 0.27612253  |
| LOC644953 | 0.027679843  | 5.927089094 | 0.276149638 |
| KBTBD6    | 0.03882572   | 6.280296799 | 0.276198363 |
| FLJ12355  | 0.029954249  | 6.171788124 | 0.276220922 |
| EPHB2     | -0.025161578 | 6.077525512 | 0.276242449 |
| FOXD4L1   | -0.021881887 | 6.077340902 | 0.276301207 |
| LOC644828 | -0.026013515 | 6.169223226 | 0.276313252 |
| LOC641994 | 0.02730755   | 6.110383907 | 0.276425188 |
| TYK2      | 0.042309558  | 9.58876596  | 0.276456873 |
| MEFV      | -0.02216915  | 6.093537231 | 0.276464158 |
| FLJ41841  | 0.033035069  | 5.928760505 | 0.276596295 |
| PCDHB11   | 0.020793357  | 5.998870865 | 0.276612265 |
| LOC729486 | 0.019622303  | 6.146810933 | 0.276669403 |
| RAX       | 0.031564422  | 5.974494851 | 0.276759544 |



## DEG.infomation

|               |              |             |             |
|---------------|--------------|-------------|-------------|
| DEFB1         | -0.039290814 | 6.240662913 | 0.27686755  |
| LOC653673     | 0.037254276  | 6.096423024 | 0.276893978 |
| HYAL3         | -0.032607012 | 6.432251803 | 0.276919996 |
| RAB7L1        | 0.052627694  | 7.58617602  | 0.276930138 |
| TTC4          | 0.056239511  | 9.95118359  | 0.276980441 |
| LOC649937     | -0.024720431 | 5.995748375 | 0.277227263 |
| SPEF1         | -0.04456789  | 6.056711412 | 0.277243142 |
| LOC644679     | 0.027051822  | 6.247156606 | 0.277381882 |
| GPR149        | -0.024359728 | 6.158397318 | 0.277473536 |
| PKP1          | 0.022034508  | 6.11459154  | 0.27758697  |
| LOC653899     | -0.025993213 | 6.030539549 | 0.277718233 |
| POTE2         | -0.020088842 | 5.998248983 | 0.277744592 |
| LOC652828     | 0.023957499  | 6.087135803 | 0.277766167 |
| SMPD4         | 0.032908857  | 6.6269962   | 0.277790986 |
| LOC652765     | -0.028100902 | 6.023855441 | 0.277839548 |
| LOC646103     | -0.016786725 | 6.286589012 | 0.277851653 |
| C1ORF180      | 0.028649765  | 5.929602917 | 0.27786715  |
| LOC390595     | -0.032738573 | 5.914236391 | 0.277884596 |
| FUS           | -0.034732391 | 7.093303202 | 0.277895078 |
| LOC643950     | -0.025782381 | 6.115905571 | 0.277909699 |
| SPRYD5        | 0.027538227  | 6.494011616 | 0.27795157  |
| SYAP1         | -0.050708359 | 7.619521064 | 0.277977021 |
| B3GALT5       | 0.016141089  | 6.016980058 | 0.277993642 |
| FAM12B        | -0.032112227 | 6.147673905 | 0.278023984 |
| SCTR          | 0.037669061  | 6.310821313 | 0.278057686 |
| ZNF512B       | 0.045642022  | 7.140274168 | 0.278188453 |
| LOC649159     | 0.023872257  | 6.147052914 | 0.278204928 |
| LOC644580     | 0.040390488  | 6.030378761 | 0.278334227 |
| PLEKHA7       | 0.09068001   | 8.112168766 | 0.278360701 |
| SLC30A6       | 0.023818089  | 6.226533247 | 0.278388881 |
| PCDHA13       | -0.019853997 | 6.035051129 | 0.278398871 |
| SNRPD2        | 0.047286179  | 11.69706741 | 0.278419304 |
| P2RY10        | 0.026499775  | 6.107455756 | 0.278506659 |
| LOC440748     | -0.0184188   | 6.104646843 | 0.278588427 |
| LOC645494     | 0.025151924  | 6.071647222 | 0.27859888  |
| LOC283157     | 0.040571341  | 6.282368867 | 0.278688642 |
| FBLN2         | 0.090534943  | 8.777800227 | 0.27871985  |
| LOC649935     | 0.026222043  | 6.043931434 | 0.278803975 |
| LOC652903     | -0.040339219 | 6.363814218 | 0.278909917 |
| MAF1          | 0.047556457  | 8.56535811  | 0.278916067 |
| SIGIRR        | -0.041888541 | 6.634776368 | 0.278997836 |
| HSPA8         | -0.081594555 | 12.3157978  | 0.279119119 |
| LOC642350     | 0.02701492   | 5.973730657 | 0.279263538 |
| GLUD2         | 0.035062053  | 6.868997969 | 0.279268279 |
| ERBB2         | -0.050818533 | 8.333455154 | 0.279320352 |
| LOC644316     | -0.027861643 | 6.357708058 | 0.279493753 |
| ZNF808        | 0.027232668  | 6.079366189 | 0.279563332 |
| C19ORF21      | 0.031129332  | 6.417376818 | 0.279597318 |
| DKFZP761O2018 | 0.024902889  | 6.057040298 | 0.279609587 |
| LOC648044     | 0.027805492  | 6.151744595 | 0.279720256 |
| OR51F2        | -0.018370736 | 5.944237996 | 0.279748212 |

## DEG.infomation

|           |              |             |             |
|-----------|--------------|-------------|-------------|
| C1ORF64   | -0.054037582 | 6.319190628 | 0.279928272 |
| SPTBN5    | 0.036097705  | 6.320643567 | 0.279939912 |
| FLJ34969  | 0.027918754  | 6.011949823 | 0.27995153  |
| LOC643143 | 0.027308396  | 6.112170115 | 0.280066004 |
| KIAA0947  | 0.029125527  | 6.657211601 | 0.280119078 |
| TBC1D26   | 0.022419585  | 5.997748592 | 0.280136136 |
| RPS12     | -0.068941432 | 13.15559224 | 0.280209838 |
| LOC644779 | 0.031294983  | 5.980101353 | 0.280239127 |
| LOC649088 | 0.026240929  | 6.103887132 | 0.280291172 |
| LOC730357 | -0.02712032  | 6.151646471 | 0.280300728 |
| LOC642452 | -0.025045743 | 6.209270606 | 0.280330516 |
| TRIM46    | 0.027751868  | 6.061746504 | 0.280335564 |
| LOC649133 | 0.033199485  | 6.058833465 | 0.280371559 |
| LOC654244 | 0.053154859  | 6.669183504 | 0.280387385 |
| KCNC1     | 0.02786975   | 5.970661703 | 0.280407731 |
| ZNF473    | 0.026541399  | 6.901746943 | 0.280514827 |
| OR6C1     | 0.027572242  | 5.853720224 | 0.280529633 |
| OR2T11    | 0.030538209  | 6.304689697 | 0.280534643 |
| LOC647873 | 0.027591634  | 6.162561967 | 0.28058585  |
| ARMC7     | 0.038330477  | 6.986603644 | 0.280722851 |
| GOLGA2L1  | 0.034503095  | 6.149624115 | 0.280764631 |
| DNAH2     | 0.025668826  | 6.028845102 | 0.280867891 |
| BRWD3     | -0.028983437 | 6.099957742 | 0.281053387 |
| WDFY3     | 0.022922572  | 6.145503947 | 0.281520317 |
| LOC643197 | -0.030309252 | 6.017203338 | 0.281659297 |
| FAM18B2   | -0.034494032 | 6.618697543 | 0.281700585 |
| VRK3      | -0.031192033 | 7.514995294 | 0.281768663 |
| POLR2F    | 0.042223394  | 11.30486176 | 0.281800227 |
| ZNF281    | 0.052949253  | 7.539878083 | 0.281832103 |
| THG1L     | 0.040853327  | 6.530485728 | 0.282114703 |
| BOK       | -0.044303324 | 7.345323539 | 0.282177213 |
| LOC647888 | 0.02639581   | 5.994627395 | 0.282225989 |
| SIT1      | -0.030594149 | 6.326985476 | 0.282349301 |
| CER1      | 0.019079517  | 6.059441696 | 0.282413763 |
| NEK11     | 0.019712568  | 6.19343348  | 0.282424282 |
| CDH9      | 0.025219359  | 6.305893105 | 0.2824285   |
| LOC440925 | 0.027534165  | 6.145903234 | 0.282442603 |
| LRRC38    | -0.088195278 | 6.619240721 | 0.282511789 |
| AVP       | -0.019413826 | 6.288098458 | 0.282556259 |
| MORF4L2   | -0.074848283 | 10.2947106  | 0.28258034  |
| FAM164C   | 0.056255252  | 7.336589874 | 0.282625288 |
| LOC653242 | 0.050220448  | 7.118890929 | 0.282628972 |
| ARL5B     | 0.02688537   | 6.401090967 | 0.282662534 |
| LOC652663 | 0.023571895  | 6.125056611 | 0.282763184 |
| WDR16     | 0.01975246   | 6.034178582 | 0.282798103 |
| LOC158830 | 0.034005074  | 6.058048254 | 0.282822862 |
| LOC388275 | 0.062061267  | 9.269259003 | 0.282963469 |
| C20ORF71  | 0.01615879   | 6.073428018 | 0.283088195 |
| FOXA2     | 0.019174307  | 5.922649699 | 0.283225304 |
| LOC646628 | 0.040176781  | 5.976947898 | 0.283407022 |
| NRG1      | -0.014063717 | 5.995521876 | 0.283426339 |

## DEG.infomation

|           |              |             |             |
|-----------|--------------|-------------|-------------|
| POLR2A    | 0.055022274  | 9.503839536 | 0.28346166  |
| LOC390933 | 0.018594306  | 6.215015277 | 0.283467646 |
| LOC646494 | 0.027052286  | 6.262441236 | 0.283644588 |
| WDR21C    | 0.029773746  | 6.21513427  | 0.283682318 |
| LOC643834 | -0.021363094 | 6.027501654 | 0.283707054 |
| ASB9      | 0.069272107  | 6.510991032 | 0.283730364 |
| LOC650410 | 0.024415884  | 6.048166648 | 0.283794972 |
| ZNF284    | -0.019902132 | 6.063034218 | 0.283962627 |
| SEC22C    | 0.038048446  | 7.972354304 | 0.284157803 |
| LOC440334 | -0.027316028 | 6.051791771 | 0.284180725 |
| SDK2      | 0.034097608  | 6.379946973 | 0.28437436  |
| ZNF232    | 0.046348019  | 6.748657974 | 0.284419927 |
| CYP4Z2P   | -0.013025358 | 6.120609066 | 0.284453893 |
| LSP1      | -0.02324568  | 6.368078976 | 0.284495938 |
| PCDH7     | 0.063720179  | 6.75279261  | 0.284546628 |
| FLJ16734  | 0.026116293  | 6.328394261 | 0.284727926 |
| SLC7A4    | 0.029622788  | 6.256247694 | 0.28474553  |
| LOC441682 | -0.027918529 | 6.189680203 | 0.285029002 |
| LOC389904 | -0.02797524  | 6.139638523 | 0.285121662 |
| ALAS1     | 0.032836008  | 7.036987363 | 0.285167257 |
| PPP1R2    | 0.056485858  | 8.624669048 | 0.285176857 |
| LOC647176 | 0.029280182  | 6.317870393 | 0.28527463  |
| LOC643912 | 0.042047824  | 6.08901626  | 0.285329969 |
| LOC653481 | -0.027907784 | 6.036236928 | 0.285365026 |
| RAB11FIP1 | -0.099545313 | 7.918915885 | 0.285379561 |
| LOC649455 | -0.026524668 | 5.975866638 | 0.285389475 |
| SLFN12L   | -0.025726714 | 5.976470512 | 0.285486918 |
| CCRL1     | 0.016433847  | 6.056381019 | 0.285554237 |
| LOC644646 | -0.022694795 | 6.081736998 | 0.285566246 |
| ZNF93     | 0.030849742  | 6.960798418 | 0.285582949 |
| LOC644539 | 0.023898065  | 6.048644726 | 0.285696083 |
| LOC652468 | -0.026192255 | 5.885853639 | 0.285725649 |
| DFNA5     | -0.077331698 | 8.181644173 | 0.285784948 |
| FBXO11    | 0.032929975  | 8.278413554 | 0.285839612 |
| LOC402670 | -0.027976672 | 6.139998384 | 0.285842662 |
| LOC648907 | 0.024726952  | 6.641697156 | 0.28588708  |
| KCNQ5     | 0.018364749  | 5.934338068 | 0.286138941 |
| MAS1L     | 0.025607767  | 6.12947566  | 0.286155457 |
| PPCDC     | 0.0286978    | 6.031301095 | 0.286195579 |
| LOC642671 | 0.026051882  | 6.020788359 | 0.286339817 |
| APOL2     | -0.027971855 | 6.485809064 | 0.286435801 |
| LOC402693 | 0.027779821  | 6.235517259 | 0.286534899 |
| LOC650553 | -0.026325228 | 5.984132748 | 0.286572489 |
| LOC647461 | 0.027112936  | 5.971620874 | 0.286584276 |
| ZNF592    | -0.032543875 | 6.241342854 | 0.286584642 |
| LOC650098 | 0.02642724   | 6.109699487 | 0.286612528 |
| CLEC2A    | 0.024921762  | 6.092399719 | 0.286617288 |
| THSD7B    | 0.022478443  | 6.087452063 | 0.286677406 |
| CHRNA10   | -0.042091642 | 6.05336563  | 0.286822742 |
| BCL2A1    | 0.033008783  | 6.415590552 | 0.286832862 |
| GBP7      | -0.029420848 | 5.995480391 | 0.286963815 |

## DEG.infomation

|           |              |             |             |
|-----------|--------------|-------------|-------------|
| SH3BP5L   | -0.067223088 | 7.190026009 | 0.286979511 |
| IGFBP7    | -0.083245164 | 12.17299665 | 0.287183183 |
| LOC646845 | -0.023540605 | 6.013134545 | 0.287201945 |
| ANG       | -0.057144539 | 7.747317659 | 0.28725294  |
| MRPL43    | 0.054141619  | 8.48597188  | 0.287365782 |
| MAGEC2    | 0.019010376  | 6.094937397 | 0.287492214 |
| C13ORF28  | 0.027478601  | 6.132183578 | 0.287604563 |
| LOC439949 | -0.029514049 | 6.102187402 | 0.287672934 |
| SLC35F3   | 0.017574637  | 6.006800217 | 0.28767536  |
| C15ORF21  | 0.018120676  | 6.160035948 | 0.287885979 |
| FAM53A    | -0.040212199 | 6.238141359 | 0.287903551 |
| ACBD6     | 0.035549896  | 7.827815399 | 0.287952542 |
| MRPL51    | -0.040966054 | 11.39411316 | 0.288050343 |
| GJC2      | -0.047174423 | 7.354260088 | 0.288054624 |
| C1ORF88   | 0.036544863  | 6.410911858 | 0.28813617  |
| LOC727851 | 0.020620227  | 6.024627782 | 0.288146541 |
| LOC645273 | -0.025341474 | 6.068838437 | 0.288209832 |
| RAB25     | -0.023382489 | 6.157426499 | 0.288244846 |
| CCDC17    | -0.030386134 | 6.348380499 | 0.28831946  |
| UNK       | 0.026508288  | 5.98023012  | 0.288320325 |
| OR10AD1   | -0.028901112 | 6.025970539 | 0.288338591 |
| GPATC4    | 0.025580474  | 6.113333439 | 0.288340583 |
| ATP11A    | 0.020041621  | 6.009348031 | 0.288340791 |
| NTS       | -0.019549821 | 5.983101056 | 0.288367509 |
| TACC3     | -0.033056615 | 6.332766685 | 0.28840275  |
| PDE3A     | -0.057722657 | 7.368984889 | 0.288405582 |
| LOC400986 | 0.041802651  | 6.35934032  | 0.288490131 |
| LOC648167 | -0.023805603 | 5.980329093 | 0.288695373 |
| LOC389394 | -0.024818377 | 6.005258739 | 0.288755844 |
| TEX9      | 0.018474313  | 6.070669636 | 0.288763017 |
| KRTAP27-1 | 0.020506572  | 6.13492949  | 0.288803027 |
| LOC646262 | 0.025660868  | 6.261469654 | 0.288803263 |
| LOC652522 | -0.023446534 | 5.973371511 | 0.288879648 |
| NFATC3    | 0.018711792  | 6.72770078  | 0.288893758 |
| TEX15     | 0.028094034  | 5.907227424 | 0.288911669 |
| HTR7P     | 0.03614399   | 6.003447769 | 0.289067267 |
| LOC647941 | 0.025711383  | 6.120738884 | 0.289211505 |
| MIAT      | 0.029948336  | 5.994532039 | 0.289294871 |
| FLJ16323  | 0.025525829  | 6.165669049 | 0.289333501 |
| THEX1     | -0.030713909 | 5.972836208 | 0.28946288  |
| COPB2     | -0.056552247 | 9.151947486 | 0.28957404  |
| FOXD4L3   | 0.035682101  | 6.040109499 | 0.28963824  |
| TM4SF5    | 0.033299491  | 5.832723443 | 0.289687127 |
| TXNIP     | 0.109437799  | 11.64753576 | 0.28974925  |
| OR51E2    | 0.029763877  | 6.278021288 | 0.289816255 |
| GPRC5C    | -0.035544917 | 7.798918105 | 0.289819698 |
| LOC646197 | 0.080887439  | 8.903716739 | 0.2899039   |
| RNF167    | -0.044269128 | 8.183188958 | 0.289975009 |
| RXFP3     | -0.024286908 | 6.108506703 | 0.289999838 |
| AVPR1A    | -0.030891078 | 6.037893405 | 0.290010049 |
| C14ORF119 | 0.048253762  | 6.114201172 | 0.290012973 |

## DEG.infomation

|           |              |             |             |
|-----------|--------------|-------------|-------------|
| LOC647868 | -0.024621781 | 5.946809754 | 0.290013938 |
| ZNF490    | -0.029459718 | 6.012261771 | 0.290076555 |
| GAGE8     | 0.034122498  | 5.939705744 | 0.290094053 |
| GLIPR1L1  | 0.027033473  | 6.284603628 | 0.29011151  |
| LOC390211 | -0.024611547 | 6.019240962 | 0.290198828 |
| FIZ1      | -0.029952675 | 7.077493802 | 0.290227693 |
| TMEM138   | -0.037312412 | 7.768558729 | 0.290241047 |
| RBM23     | -0.044739907 | 8.984244401 | 0.290262836 |
| OR4C6     | 0.027977102  | 6.045977806 | 0.290347672 |
| LOC388476 | 0.023697028  | 6.049513657 | 0.290354565 |
| MSH4      | 0.027548898  | 6.149650731 | 0.290464154 |
| LOC650794 | 0.017695288  | 6.028202318 | 0.290467894 |
| RTTN      | 0.069575924  | 8.838644316 | 0.290520325 |
| LOC389599 | 0.069334052  | 8.501654401 | 0.290613708 |
| SCAND2    | 0.01616984   | 6.277922476 | 0.290652652 |
| LSS       | -0.029884313 | 7.37328074  | 0.290659411 |
| FLNB      | -0.066751602 | 8.778974788 | 0.290841175 |
| DRD2      | 0.021837626  | 5.984284997 | 0.290919437 |
| KRT76     | 0.026386457  | 6.049380933 | 0.291018807 |
| SNX7      | -0.047256412 | 7.070501883 | 0.29105723  |
| ZNF677    | -0.027871108 | 6.075849802 | 0.291216453 |
| LOC644635 | 0.029676162  | 6.177760992 | 0.291220802 |
| PALMD     | 0.031821961  | 6.275641264 | 0.291247595 |
| WIT-1     | -0.035714761 | 6.307796191 | 0.291258886 |
| LOC728939 | -0.025187521 | 6.208415814 | 0.291328758 |
| LOC646748 | -0.028242614 | 6.029073021 | 0.291387664 |
| LOC651441 | -0.030524209 | 6.140264664 | 0.291404023 |
| C14ORF48  | -0.027068912 | 6.227530598 | 0.291404228 |
| LOC732162 | 0.019265031  | 6.034113276 | 0.291428952 |
| QPCTL     | -0.025501541 | 6.121249576 | 0.291440483 |
| MXD1      | -0.030692946 | 6.905098375 | 0.291441085 |
| PHF15     | -0.051666538 | 7.860912679 | 0.291617194 |
| CYP51A1   | -0.081735219 | 7.445577639 | 0.291673162 |
| ALX3      | 0.019248665  | 6.109477647 | 0.291695169 |
| ZNF117    | -0.0224052   | 5.972972813 | 0.291791506 |
| FLJ25006  | 0.029220916  | 6.49904492  | 0.29180032  |
| LOC729647 | 0.02762733   | 6.217882482 | 0.291812909 |
| CDC2      | -0.022947737 | 6.193894249 | 0.291843098 |
| TRIM15    | 0.01651316   | 6.000523009 | 0.291909182 |
| HNF4A     | 0.016022718  | 6.075074409 | 0.291952074 |
| LOC651561 | -0.03408638  | 5.90159101  | 0.292058115 |
| SCNN1A    | -0.025466836 | 6.066220334 | 0.292158383 |
| CA7       | 0.019193148  | 6.002585133 | 0.292184448 |
| BTBD6     | -0.067243569 | 9.286790671 | 0.292371689 |
| UBP1      | 0.039962718  | 9.208655378 | 0.292377267 |
| SLC14A2   | -0.025044833 | 6.206361744 | 0.292406284 |
| LOC284402 | 0.024860795  | 6.025890923 | 0.292406306 |
| SPRR2A    | 0.028301703  | 6.060420743 | 0.29247857  |
| LOC645708 | -0.031067011 | 6.06043076  | 0.292503704 |
| SLC5A5    | -0.026452684 | 5.937331862 | 0.292524331 |
| SNRPD3    | 0.052940142  | 7.434311805 | 0.292566797 |

## DEG.infomation

|           |              |             |             |
|-----------|--------------|-------------|-------------|
| SET       | 0.105526247  | 9.535711548 | 0.292580933 |
| SCAF1     | -0.032126804 | 6.414284704 | 0.292684963 |
| ROM1      | 0.044442648  | 7.075607778 | 0.292793992 |
| C18ORF20  | -0.029626641 | 5.99452393  | 0.292798221 |
| ATP2C2    | -0.03142965  | 5.938789164 | 0.292845731 |
| SETD6     | -0.0383031   | 5.831193432 | 0.292860482 |
| LOC653800 | 0.031661256  | 6.376207819 | 0.293260902 |
| LOC652906 | -0.025752416 | 6.064347074 | 0.29327798  |
| LSM2      | -0.072649616 | 9.87329744  | 0.293303783 |
| LOC728219 | -0.031548182 | 6.036737896 | 0.293304693 |
| RNASE13   | -0.028994404 | 6.026677385 | 0.293308955 |
| LOC728919 | 0.024745123  | 6.176068331 | 0.293314204 |
| LOC730862 | 0.025150304  | 6.04424936  | 0.293576839 |
| ELA1      | -0.03068354  | 5.928206071 | 0.293614563 |
| KRT80     | -0.04841111  | 6.197961635 | 0.293648547 |
| LOC401447 | 0.019049006  | 6.070931255 | 0.293948197 |
| LOC643149 | 0.024030455  | 6.052495876 | 0.293958099 |
| LOC647344 | -0.029460535 | 5.904544166 | 0.294010959 |
| EEF1A1    | 0.065857087  | 13.51060084 | 0.294169725 |
| ING5      | -0.017365909 | 6.122892678 | 0.29417972  |
| HSPB9     | -0.028286362 | 5.976096003 | 0.294261195 |
| RPS23     | 0.140477814  | 10.66773325 | 0.294320389 |
| ISG15     | -0.132706686 | 7.883125001 | 0.294336519 |
| LOC643326 | 0.027065536  | 6.127470184 | 0.294510756 |
| FSIP2     | -0.026373355 | 6.029026726 | 0.294515251 |
| LYZL4     | -0.024627033 | 6.003519931 | 0.294552297 |
| C6ORF58   | 0.026500181  | 5.931159402 | 0.294667671 |
| NDUFS7    | 0.055602282  | 12.48062535 | 0.29475685  |
| PTOV1     | -0.044126568 | 9.934262899 | 0.294925333 |
| LOC400965 | -0.032050818 | 6.124988607 | 0.29506722  |
| SLC12A7   | 0.028684794  | 6.08502774  | 0.295069398 |
| JAK3      | -0.028354834 | 5.953321261 | 0.295102356 |
| LOC647050 | 0.02706021   | 6.300295293 | 0.295173129 |
| LOC728912 | 0.017408281  | 6.023934505 | 0.295187783 |
| GDF7      | -0.0259271   | 6.13697579  | 0.295240323 |
| LOC652389 | 0.030539845  | 6.290392561 | 0.295267126 |
| LOC642711 | -0.027479587 | 5.986884932 | 0.295307411 |
| SYTL5     | 0.037660433  | 6.216939784 | 0.295320591 |
| ARHGAP6   | -0.013592708 | 6.012373977 | 0.295422563 |
| GHSR      | -0.020193994 | 6.058583575 | 0.295456301 |
| TAS2R14   | 0.026769135  | 6.075906845 | 0.295541726 |
| LOC648981 | 0.027192557  | 5.895089976 | 0.295624593 |
| FBXO22OS  | 0.024098085  | 6.118725072 | 0.295685727 |
| PACRG     | 0.0547928    | 6.63413042  | 0.295722184 |
| LOC727987 | -0.053758791 | 6.252894048 | 0.2957329   |
| PSENN     | -0.034922828 | 7.103393102 | 0.295744612 |
| LOC654123 | -0.019266954 | 6.051924076 | 0.295747436 |
| DRP2      | -0.025005461 | 5.847455352 | 0.29577171  |
| ECSIT     | -0.052288532 | 8.227527067 | 0.29578346  |
| TMEM130   | -0.027997022 | 6.058724882 | 0.295798019 |
| LOC649540 | -0.027272055 | 6.148552349 | 0.295870512 |

DEG.infomation

|           |              |             |             |
|-----------|--------------|-------------|-------------|
| SERHL2    | 0.024023266  | 6.162667186 | 0.29596263  |
| LOC649851 | 0.027935124  | 6.286101615 | 0.295977464 |
| PAPD1     | 0.042857333  | 8.447520162 | 0.295984552 |
| LOC650869 | -0.026103349 | 5.953834312 | 0.296039583 |
| LOC643090 | 0.027347198  | 5.93929347  | 0.296054413 |
| LOC646090 | -0.02370739  | 6.101212253 | 0.296099948 |
| LOC644921 | -0.026283911 | 5.944721737 | 0.2962647   |
| KISS1R    | -0.028944562 | 5.999757001 | 0.29627005  |
| HSD17B7P2 | -0.027654087 | 6.171178849 | 0.296298112 |
| LOC653657 | 0.026725302  | 5.926496995 | 0.296346112 |
| LOC653272 | -0.029461744 | 5.971566796 | 0.296352845 |
| LOC121981 | 0.024313544  | 5.983127529 | 0.296411954 |
| LOC644305 | -0.023130257 | 5.92129923  | 0.296423714 |
| TAAR5     | -0.026608043 | 6.058408054 | 0.296443689 |
| LOC649305 | 0.033617231  | 6.068607771 | 0.296580979 |
| C2CD3     | 0.024509565  | 6.119015678 | 0.296732232 |
| LOC347292 | -0.049727917 | 8.286633967 | 0.296782642 |
| LOC647783 | -0.02628884  | 6.019390992 | 0.2967969   |
| NR2E3     | -0.015899049 | 6.046280413 | 0.296829267 |
| IFP38     | 0.082814034  | 8.014124529 | 0.29691069  |
| LOC651825 | 0.023358033  | 6.015101886 | 0.296988306 |
| LOC652730 | 0.027352502  | 6.160979418 | 0.296991135 |
| LOC650114 | 0.025524204  | 5.971776935 | 0.297058023 |
| LOC644548 | 0.01750193   | 6.134501961 | 0.2971242   |
| PRKG2     | -0.028041769 | 5.993596732 | 0.297158438 |
| FLJ25404  | -0.025896106 | 6.122847673 | 0.297179382 |
| LOC642144 | 0.02206087   | 6.100292989 | 0.297334123 |
| SUV39H2   | 0.03352888   | 6.780448729 | 0.297398626 |
| FAH       | -0.062693204 | 7.564325225 | 0.297497413 |
| MDGA2     | 0.024926404  | 6.078388903 | 0.297518721 |
| ZNF785    | -0.031846264 | 6.263058095 | 0.297545859 |
| OR8A1     | -0.024946086 | 6.071913419 | 0.297587057 |
| GHRH      | 0.028307452  | 6.016298573 | 0.297606836 |
| LOC652781 | 0.024682574  | 6.058221899 | 0.297611757 |
| KRTAP9-5  | -0.025630094 | 5.986666652 | 0.297844781 |
| LOC389286 | -0.077408973 | 8.289848714 | 0.298040325 |
| OR10K2    | -0.029128142 | 5.922110382 | 0.298096272 |
| POLR1D    | -0.053207642 | 10.46152377 | 0.298155096 |
| PLCXD3    | 0.082627414  | 9.979563579 | 0.298234613 |
| LRRC27    | 0.028856481  | 6.028827557 | 0.298440408 |
| LOC645724 | 0.021864389  | 5.973335574 | 0.298530645 |
| PIK3CB    | 0.05126452   | 6.974477399 | 0.298608452 |
| LOC653425 | 0.027128939  | 5.980382999 | 0.298709776 |
| LOC646665 | -0.029296963 | 6.253434777 | 0.298787717 |
| ENPP6     | 0.027519599  | 6.048035459 | 0.298860243 |
| RUVBL1    | -0.038391805 | 7.603276466 | 0.298974871 |
| TBC1D9B   | -0.037363678 | 7.403194748 | 0.298998458 |
| LHX8      | 0.027408705  | 6.000798821 | 0.299010734 |
| OR8K5     | -0.019866429 | 6.149588364 | 0.2991336   |
| LOC652255 | 0.023954494  | 6.082294791 | 0.299147418 |
| LOC645385 | -0.058058805 | 10.62689896 | 0.299148799 |

## DEG.infomation

|           |              |             |             |
|-----------|--------------|-------------|-------------|
| DNAJB8    | 0.03183938   | 6.309411443 | 0.299338457 |
| LOC653601 | -0.025741668 | 6.063898626 | 0.299345212 |
| GAD1      | -0.016173832 | 6.010540654 | 0.299387188 |
| PTPLA     | 0.056663594  | 11.50316412 | 0.299423513 |
| HDX       | 0.029283643  | 6.250957961 | 0.299436256 |
| OR5L1     | 0.018138421  | 6.000755651 | 0.299477594 |
| LOC651468 | 0.027018485  | 6.116815699 | 0.299517897 |
| CRB1      | 0.018302846  | 6.06884876  | 0.299538693 |
| LOC645799 | -0.019986498 | 6.049990783 | 0.299656796 |
| MGC40499  | 0.027021725  | 6.20821771  | 0.29967064  |
| SYN1      | 0.044231076  | 7.13495796  | 0.299722377 |
| LOC641733 | -0.028638867 | 6.002946656 | 0.299765973 |
| LOC645651 | 0.027094927  | 5.991152108 | 0.299810495 |
| C2ORF48   | -0.030074363 | 6.326912502 | 0.29985711  |
| BMPR1B    | -0.030577699 | 5.965453153 | 0.299861146 |
| C1ORF220  | 0.025675513  | 5.964042299 | 0.299986642 |
| PRR8      | 0.036444062  | 6.23204739  | 0.300086954 |
| LOC92017  | -0.032177288 | 6.440457037 | 0.300174497 |
| KIF2B     | -0.022759015 | 6.070662802 | 0.300263333 |
| OR5H6     | 0.024537245  | 5.982515133 | 0.300290689 |
| LRRC4C    | 0.032253151  | 6.286182248 | 0.3004015   |
| LOC653104 | 0.024213597  | 6.063631733 | 0.300440823 |
| LOC441257 | -0.019194979 | 6.050283875 | 0.3004897   |
| KCNN1     | 0.036536587  | 6.049140204 | 0.300736962 |
| ENOPH1    | 0.054599173  | 8.988352054 | 0.300739927 |
| LOC647707 | -0.025056294 | 5.937543985 | 0.300849556 |
| SESN1     | 0.053900759  | 9.223606229 | 0.30088503  |
| LOC392395 | -0.022562861 | 6.011900621 | 0.300934454 |
| LOC641950 | -0.023445355 | 5.998020489 | 0.300977588 |
| TACSTD2   | 0.03344415   | 6.125002553 | 0.301120725 |
| SNAG1     | -0.026964228 | 6.069132675 | 0.3013685   |
| NKTR      | -0.048320417 | 8.898204056 | 0.301391593 |
| ARFIP2    | 0.058118329  | 6.024728094 | 0.301442352 |
| LOC652618 | 0.030127076  | 6.030990729 | 0.301470478 |
| C20ORF106 | -0.019771929 | 6.053781555 | 0.30149807  |
| ERGIC3    | -0.052182111 | 9.21017678  | 0.301684152 |
| C20ORF117 | -0.034115018 | 6.72767714  | 0.301699792 |
| OTOA      | -0.017412401 | 6.00890345  | 0.30170994  |
| DDX46     | -0.049395699 | 8.231585917 | 0.301742737 |
| DEADC1    | -0.023909172 | 6.167293126 | 0.301837043 |
| SLC6A20   | 0.016108228  | 6.158253734 | 0.301850049 |
| C3ORF24   | 0.017838054  | 5.988738658 | 0.302056218 |
| LOC286187 | -0.03092095  | 5.849004545 | 0.302130489 |
| TRPM8     | -0.017412777 | 5.974891487 | 0.30229803  |
| AURKC     | 0.018165454  | 6.111318725 | 0.302336575 |
| GPR75     | 0.025529358  | 6.096974486 | 0.302410816 |
| PI4KAP2   | -0.047802964 | 8.144647364 | 0.302450499 |
| PNMA2     | 0.056088228  | 7.100363108 | 0.302460524 |
| LOC401351 | 0.028327264  | 6.05620805  | 0.302488411 |
| SLC8A3    | -0.016160523 | 6.094281547 | 0.30250966  |
| UGT1A7    | 0.026595693  | 5.987887863 | 0.302513862 |



## DEG.infomation

|           |              |             |             |
|-----------|--------------|-------------|-------------|
| CLK2P     | -0.01726816  | 6.088907904 | 0.30256576  |
| CACNG3    | 0.027278229  | 6.120176165 | 0.302571947 |
| C2ORF21   | 0.019265366  | 6.228937423 | 0.302593414 |
| LOC643272 | -0.025531176 | 6.177546802 | 0.302672676 |
| ATP6V1B1  | 0.056528662  | 6.577634252 | 0.302730435 |
| DDX41     | -0.041120036 | 7.563700119 | 0.302898666 |
| OR10X1    | -0.028014451 | 5.903428618 | 0.302961082 |
| LOC652790 | 0.0250017    | 6.527033763 | 0.302971325 |
| LOC728340 | 0.025246326  | 5.942565694 | 0.302971708 |
| TRAF7     | -0.026429173 | 6.469606731 | 0.303008762 |
| MATN4     | 0.016869426  | 5.976269196 | 0.30309193  |
| ERLIN1    | -0.045198266 | 6.309886323 | 0.303221152 |
| TTC28     | -0.024023095 | 6.122651963 | 0.303254997 |
| LOC647391 | 0.027323543  | 6.058989161 | 0.30330601  |
| GJB4      | 0.038558623  | 5.970566674 | 0.303309088 |
| IGFN1     | -0.02743173  | 5.939811218 | 0.30334878  |
| ABHD12B   | -0.015141665 | 6.061148619 | 0.303355753 |
| PPP1R12B  | 0.0803629    | 7.529430695 | 0.303385107 |
| LOC646897 | -0.036896067 | 6.461808626 | 0.303386227 |
| LOC652685 | 0.037692564  | 7.144142152 | 0.30339388  |
| LOC649327 | -0.02546411  | 5.989425011 | 0.30367411  |
| ERAP2     | -0.143967291 | 7.253052942 | 0.30369598  |
| LOC644131 | 0.073843173  | 7.299860419 | 0.303724125 |
| LOC643623 | 0.018397671  | 6.116321058 | 0.303734369 |
| LOC649497 | -0.029659451 | 6.109782931 | 0.303748995 |
| LOC652860 | -0.023843639 | 5.996445155 | 0.303783907 |
| TDRD5     | -0.025705074 | 5.935087711 | 0.30391801  |
| CDRT15P   | 0.034727173  | 6.029284134 | 0.303925943 |
| LOC283553 | -0.024700677 | 6.015802195 | 0.304041433 |
| ZNF182    | -0.023354373 | 6.475285846 | 0.304079706 |
| NLRP2     | 0.030314392  | 5.904272727 | 0.304138149 |
| LOC388022 | -0.026834318 | 5.930083918 | 0.304170007 |
| EIF2B2    | 0.049767409  | 8.897521184 | 0.304251195 |
| LOC642149 | -0.030400346 | 6.03876416  | 0.304505192 |
| ZFYVE20   | 0.034950261  | 9.888526487 | 0.304516811 |
| LOC554235 | -0.026490515 | 6.097130349 | 0.304582489 |
| CDKL5     | 0.015296942  | 6.075555277 | 0.304616765 |
| H2BFXP    | -0.022643502 | 6.025605878 | 0.304646789 |
| KIAA2013  | 0.04650059   | 8.478548629 | 0.304737325 |
| FRMPD3    | -0.033409341 | 6.222872053 | 0.304763193 |
| LARP1     | 0.044112334  | 7.853998647 | 0.304862585 |
| LOC654106 | 0.03294709   | 5.974483127 | 0.304865222 |
| LOC647983 | -0.026203362 | 5.935313406 | 0.304976434 |
| LOC650030 | 0.021174556  | 6.301205842 | 0.304981182 |
| GSDM1     | 0.045896406  | 6.792748689 | 0.3052204   |
| OTOL1     | -0.024731041 | 6.023385088 | 0.305254568 |
| LOC646303 | 0.029361832  | 6.183695606 | 0.305263857 |
| LDHAL6B   | 0.019105875  | 6.078978373 | 0.305277499 |
| LOC283874 | 0.033311957  | 6.569947111 | 0.305320314 |
| HHIPL2    | 0.037753226  | 6.011661172 | 0.305489296 |
| LOC731548 | -0.028681334 | 6.077131252 | 0.305579746 |

## DEG.infomation

|           |              |             |             |
|-----------|--------------|-------------|-------------|
| LOC645284 | -0.063404479 | 7.113224705 | 0.305592973 |
| LOC652235 | 0.023890903  | 6.01553168  | 0.305644638 |
| GTF2IP1   | 0.050102115  | 8.024458108 | 0.305670701 |
| LOC342892 | 0.025894427  | 6.226749408 | 0.305707161 |
| P2RX7     | 0.037956023  | 7.646602055 | 0.305733583 |
| SAC       | 0.033830315  | 6.289609624 | 0.305747566 |
| LOC439951 | -0.023611185 | 6.079672078 | 0.305788352 |
| LOC648496 | 0.027455558  | 6.053336873 | 0.305814599 |
| ADAM5P    | 0.028911428  | 5.990754885 | 0.305958647 |
| NKD1      | 0.029419317  | 6.080783158 | 0.305976686 |
| SEMA3B    | 0.047766093  | 6.745490557 | 0.305982806 |
| LOC347475 | -0.025312995 | 5.945395373 | 0.305993031 |
| RIOK1     | -0.027035202 | 7.00761702  | 0.306014969 |
| LOC652557 | -0.024343936 | 6.204340051 | 0.306077905 |
| GPRC6A    | 0.024442127  | 6.130857517 | 0.306078367 |
| LOC650733 | 0.022861303  | 6.012652975 | 0.30608424  |
| PVRL1     | -0.015420556 | 6.116303249 | 0.306097095 |
| ANKRD45   | -0.0280068   | 6.145475144 | 0.306239037 |
| PAX2      | 0.017174151  | 6.120398836 | 0.306403268 |
| LOC652697 | 0.033743622  | 6.049814935 | 0.306442163 |
| GRHL2     | 0.02829062   | 6.061947693 | 0.306467105 |
| EVX2      | 0.022476714  | 5.975573966 | 0.306468284 |
| OCLM      | 0.024816848  | 6.090702022 | 0.306500655 |
| OR5AC2    | -0.024052882 | 5.916547962 | 0.306506099 |
| DYRK1A    | 0.043857282  | 8.195690146 | 0.306548698 |
| SRP54     | -0.033849241 | 9.084496274 | 0.306639446 |
| BTA1F1    | 0.047504772  | 8.300460834 | 0.306660403 |
| FANK1     | 0.02691378   | 6.23000928  | 0.306676829 |
| HUWE1     | -0.057074484 | 8.080432023 | 0.306762815 |
| MEX3B     | -0.033231731 | 6.421267813 | 0.306807215 |
| LOC646484 | 0.019195595  | 5.957348883 | 0.30688308  |
| LOC647718 | 0.020245126  | 6.183869625 | 0.306905626 |
| LOC649563 | 0.016553861  | 6.066127648 | 0.306933602 |
| C6ORF154  | -0.026893396 | 6.152666343 | 0.306934341 |
| GLS2      | 0.018661395  | 6.014194168 | 0.306938734 |
| VN1R5     | -0.026558801 | 6.139149164 | 0.307065849 |
| TLX3      | -0.031499091 | 5.976401301 | 0.307119682 |
| LOC728608 | -0.032198551 | 6.34206515  | 0.307125458 |
| C13ORF39  | -0.029260902 | 5.933982339 | 0.307194642 |
| LOC643007 | -0.08657542  | 7.285562072 | 0.307298902 |
| LOC642374 | 0.025666969  | 6.075508314 | 0.307318094 |
| LOC651169 | 0.030310615  | 6.280296031 | 0.307330868 |
| KAAG1     | -0.026766525 | 6.052908297 | 0.307372735 |
| LOC392489 | 0.024971014  | 6.199579269 | 0.307381884 |
| LOC653353 | -0.030222583 | 5.98809816  | 0.307455004 |
| DR1       | 0.05423502   | 7.989461213 | 0.307591862 |
| ANKFY1    | -0.050611379 | 7.289044318 | 0.307597023 |
| LOC652451 | -0.023236838 | 6.015123887 | 0.307646776 |
| PEA15     | -0.059216523 | 12.05617341 | 0.307784178 |
| TIMM22    | 0.056236216  | 9.712224232 | 0.307850472 |
| LOC391165 | -0.02755005  | 5.887375706 | 0.307908332 |

## DEG.infomation

|           |              |             |             |
|-----------|--------------|-------------|-------------|
| CBLC      | 0.023538267  | 6.114357992 | 0.307948659 |
| HEATR5B   | 0.057874774  | 8.50195131  | 0.308116048 |
| IFI44     | -0.085322652 | 8.444764065 | 0.308121157 |
| LOC642369 | 0.027036308  | 6.382285901 | 0.308244674 |
| STX6      | -0.034149926 | 7.703379674 | 0.308333016 |
| LOC644749 | 0.025593616  | 6.141850529 | 0.308444147 |
| FLJ38377  | 0.027924032  | 6.054640534 | 0.308473092 |
| ATP13A4   | 0.028474377  | 6.016992115 | 0.308476183 |
| MLF1      | 0.104182808  | 8.02881616  | 0.308482108 |
| LOC646803 | 0.02452631   | 6.112859731 | 0.308534761 |
| KLF16     | -0.029191108 | 5.989669687 | 0.308550261 |
| DGKB      | 0.01947237   | 6.040414935 | 0.308711154 |
| PAX8      | -0.017165397 | 6.109720048 | 0.308760205 |
| LRRC45    | 0.023610084  | 6.389766649 | 0.308794528 |
| C9ORF43   | 0.03321334   | 6.252560479 | 0.308803199 |
| LOC654159 | 0.024808282  | 5.946559235 | 0.308817636 |
| LOC641947 | -0.034349196 | 5.94561635  | 0.308914448 |
| LOC645871 | -0.024765645 | 6.012036775 | 0.308965596 |
| AOF1      | 0.023676775  | 6.026205246 | 0.30897765  |
| GABRR1    | 0.027998336  | 5.967481702 | 0.30909356  |
| LOC729269 | 0.024744393  | 6.061938151 | 0.309121695 |
| LOC654092 | -0.028249164 | 6.092875773 | 0.309165829 |
| HMGN4     | 0.047701275  | 9.679328457 | 0.309192767 |
| ACRC      | -0.043752777 | 6.931065514 | 0.309348811 |
| LOC647366 | -0.015833049 | 6.000706163 | 0.309474628 |
| LOC255649 | 0.018413806  | 6.015750514 | 0.309615919 |
| CMPK1     | 0.052928493  | 8.966605614 | 0.309658116 |
| LOC650557 | -0.019354819 | 6.031471254 | 0.309750896 |
| GJB6      | -0.020538688 | 5.939473043 | 0.309768394 |
| WDR86     | 0.03956849   | 6.362003348 | 0.309885242 |
| LOC648271 | 0.024422464  | 6.04303708  | 0.309910077 |
| FAM90A10  | -0.027641016 | 6.003815268 | 0.309944873 |
| CD1E      | 0.021142184  | 6.270410134 | 0.309960881 |
| C8ORF34   | -0.031502612 | 6.657399885 | 0.310000786 |
| OR1F2P    | -0.024274552 | 6.049723552 | 0.310044579 |
| UNCX      | -0.025795695 | 5.995344296 | 0.310207102 |
| LOC651864 | -0.027834039 | 5.986941617 | 0.310313139 |
| EXT1      | 0.06135193   | 7.680905082 | 0.31033847  |
| TFB2M     | 0.057056973  | 8.702626423 | 0.31037261  |
| HIST1H4L  | -0.027366158 | 5.881828853 | 0.310577355 |
| LOC440795 | -0.021879341 | 6.061223196 | 0.310650014 |
| KCNK9     | -0.029174182 | 6.120296762 | 0.310752807 |
| C10ORF114 | 0.036590986  | 6.17599357  | 0.310778887 |
| SDC4P     | -0.028305251 | 6.184447004 | 0.310836614 |
| LOC651091 | 0.026026264  | 6.055723594 | 0.310879655 |
| AP1GBP1   | -0.020626167 | 6.159542181 | 0.310924744 |
| ATP8B2    | -0.034089402 | 6.445313099 | 0.310939042 |
| LOC652238 | -0.023173474 | 5.915473591 | 0.31105846  |
| LOC642153 | -0.027198048 | 5.95386543  | 0.311136484 |
| FKSG49    | 0.028537704  | 5.987020338 | 0.311160636 |
| NRBP1     | -0.04461977  | 7.391263002 | 0.311174265 |

## DEG.infomation

|           |              |             |             |
|-----------|--------------|-------------|-------------|
| LOC440291 | -0.025432461 | 6.079533866 | 0.311225745 |
| LOC441548 | 0.021896139  | 6.020756989 | 0.311262927 |
| LOC642781 | -0.024045852 | 6.109007141 | 0.311302928 |
| CHD4      | -0.051278179 | 9.491534814 | 0.311436328 |
| FAM20A    | -0.026777395 | 6.307234084 | 0.311467287 |
| SCRT2     | 0.02779205   | 6.021275473 | 0.311481429 |
| HLA-DQB2  | 0.030254193  | 6.136352873 | 0.311631235 |
| LOC644680 | 0.025515139  | 6.001095675 | 0.311659622 |
| VPREB3    | 0.032856391  | 6.25397221  | 0.311668588 |
| LOC653149 | 0.026224798  | 6.169499681 | 0.311713179 |
| LOC644666 | -0.026453486 | 6.209681397 | 0.311840965 |
| C14ORF169 | 0.059691643  | 7.164142263 | 0.311846449 |
| LOC387885 | 0.02573249   | 6.254266091 | 0.311915846 |
| LOC648790 | 0.02490612   | 6.004146946 | 0.311933917 |
| MEX3D     | -0.035820947 | 6.601613671 | 0.312105243 |
| LOC283104 | -0.025031864 | 6.137330628 | 0.312117871 |
| LOC646796 | 0.028747448  | 6.028481109 | 0.312225232 |
| LOC619207 | -0.015685756 | 6.009591716 | 0.312231423 |
| ZNF784    | -0.043304587 | 7.188135835 | 0.312291959 |
| NXPH2     | 0.027910065  | 6.019745862 | 0.31231962  |
| LOC255130 | 0.025746986  | 6.090843171 | 0.312440819 |
| C9ORF140  | -0.028251873 | 5.969099626 | 0.312469974 |
| C3ORF10   | 0.052194862  | 9.129517914 | 0.312492791 |
| VWA2      | 0.022628965  | 5.976648653 | 0.312504586 |
| HS6ST1    | 0.024032947  | 6.374698075 | 0.312598564 |
| RSPO3     | 0.039090837  | 6.867578025 | 0.312609246 |
| HCG4P6    | 0.026748299  | 6.073878869 | 0.312681573 |
| HUNK      | -0.025987841 | 6.009824158 | 0.312683012 |
| HTR1F     | 0.029090172  | 6.017828081 | 0.312719924 |
| LOC728117 | 0.027775542  | 6.062567324 | 0.312748542 |
| CADM4     | -0.032181674 | 6.39096558  | 0.312750219 |
| ABTB2     | 0.056654455  | 7.104891091 | 0.312792822 |
| LOC653735 | -0.02963227  | 5.973122656 | 0.312890094 |
| LOC286260 | -0.022714673 | 5.986262837 | 0.312920502 |
| LOC652510 | -0.026822776 | 5.943452538 | 0.312925862 |
| NFE2L2    | 0.057211677  | 9.099105637 | 0.312930687 |
| FZR1      | 0.036304536  | 6.818114288 | 0.313025795 |
| LOC643918 | 0.017815211  | 6.067996984 | 0.313116365 |
| KRTAP4-2  | 0.025967778  | 5.940726171 | 0.313211808 |
| LOC650107 | 0.023838123  | 6.052134463 | 0.313302212 |
| SLC6A13   | 0.036351651  | 7.179771336 | 0.313353586 |
| LOC652787 | 0.022233634  | 6.109649745 | 0.313399012 |
| LOC644717 | 0.023555797  | 6.124733304 | 0.313487594 |
| IFI6      | -0.097759181 | 10.10474667 | 0.313600218 |
| USP40     | 0.027776421  | 6.351664874 | 0.313687954 |
| APOBEC3H  | -0.023925993 | 6.044049734 | 0.313700869 |
| LOC650412 | 0.024697979  | 6.113735575 | 0.313732322 |
| LOC643990 | -0.024209266 | 6.020843981 | 0.313761975 |
| MLLT4     | 0.018342781  | 6.18373097  | 0.313768748 |
| LOC732424 | 0.025896223  | 6.098770389 | 0.313844202 |
| SCAMP4    | -0.028337157 | 6.523842549 | 0.313845897 |

## DEG.infomation

|           |              |             |             |
|-----------|--------------|-------------|-------------|
| CLEC3A    | -0.019197119 | 6.059728927 | 0.313889551 |
| LOC652022 | -0.024458657 | 6.02705546  | 0.313895013 |
| CYP3A4    | -0.023346262 | 6.024586042 | 0.313900243 |
| PSMB10    | 0.053156779  | 10.95404907 | 0.313979728 |
| POMGNT1   | 0.045186545  | 10.73352397 | 0.31401727  |
| TRPM7     | 0.028262974  | 6.340880891 | 0.314027297 |
| NUTF2     | -0.051694278 | 7.064965451 | 0.314070003 |
| TG        | 0.028224323  | 6.140823715 | 0.314201669 |
| LOC648080 | -0.02525269  | 6.038222468 | 0.31423898  |
| ACP2      | -0.067566036 | 7.242395094 | 0.314324996 |
| FAM176B   | 0.049558225  | 7.11916047  | 0.314331633 |
| TAS2R4    | 0.027197798  | 6.070005983 | 0.314358101 |
| AGRP      | -0.025625603 | 6.055734333 | 0.314371183 |
| C1ORF126  | 0.027423802  | 6.002381629 | 0.314407894 |
| KIAA1632  | 0.01945666   | 6.35856587  | 0.314446837 |
| PRDX2     | -0.05781917  | 10.79999292 | 0.314448489 |
| LOC388242 | -0.022570648 | 6.051010653 | 0.31449892  |
| LBXCOR1   | -0.022586576 | 6.074740624 | 0.314501947 |
| HKDC1     | -0.025076631 | 6.050497805 | 0.314526084 |
| LOC650716 | -0.024825456 | 6.009699894 | 0.314555455 |
| SGK2      | -0.015162493 | 5.993726982 | 0.314641916 |
| PCDHGC5   | 0.018105281  | 6.000467839 | 0.3148564   |
| LOC649813 | 0.024321051  | 6.074573319 | 0.314934902 |
| S100A5    | -0.030478079 | 6.163320636 | 0.315115259 |
| EFCAB3    | 0.026938369  | 6.107754707 | 0.315196534 |
| CPS1      | -0.037056755 | 6.611883879 | 0.31524542  |
| RPTN      | 0.024072405  | 6.071958514 | 0.315366969 |
| CFHR5     | -0.030059286 | 6.018165743 | 0.315387441 |
| OR2H1     | 0.023786608  | 5.913656564 | 0.315388543 |
| LOC441546 | -0.026221657 | 6.047942923 | 0.31540877  |
| AMAC1L1   | 0.02353184   | 6.085441343 | 0.315470821 |
| LOC644325 | -0.023527429 | 6.044816046 | 0.315505431 |
| ENDOD1    | -0.051520833 | 7.310956453 | 0.315517995 |
| ATP8B3    | 0.022783699  | 6.128317961 | 0.315638986 |
| ZMAT2     | -0.038643107 | 8.639325965 | 0.315685879 |
| MUC7      | -0.025446072 | 5.95288717  | 0.315702669 |
| C13ORF27  | -0.056104278 | 10.5020962  | 0.315706205 |
| LOC401242 | 0.025588122  | 6.150082729 | 0.315805547 |
| CD70      | -0.027790472 | 6.214228568 | 0.315876891 |
| OR13H1    | -0.024435879 | 6.042113354 | 0.31593805  |
| LOC642637 | -0.025012572 | 6.095326209 | 0.315964018 |
| LOC731408 | 0.024565884  | 6.004434986 | 0.3159921   |
| LOC645291 | -0.019887627 | 6.058160985 | 0.315996399 |
| PPIL2     | 0.015657181  | 6.14596784  | 0.316158222 |
| LOC728747 | 0.024710728  | 5.965923289 | 0.316188134 |
| LOC651167 | -0.023649302 | 6.02895911  | 0.316204534 |
| DEFB124   | -0.029241277 | 6.200091935 | 0.316225697 |
| RGPD4     | 0.019743737  | 6.02757485  | 0.316229338 |
| VAMP2     | 0.093208074  | 7.922065526 | 0.316231078 |
| PCDHA1    | 0.014437339  | 6.047991566 | 0.316245548 |
| RSPH1     | 0.02613598   | 6.05852712  | 0.316325899 |

## DEG.infomation

|               |              |             |             |
|---------------|--------------|-------------|-------------|
| XYLB          | -0.02426001  | 6.115693698 | 0.316343823 |
| RHOXF2B       | 0.01834013   | 6.110390277 | 0.316391029 |
| C1ORF57       | 0.060290073  | 9.396080168 | 0.316446902 |
| LOC643965     | 0.028602527  | 5.919267037 | 0.316531651 |
| LOC642338     | -0.025830297 | 6.005283752 | 0.316548182 |
| LOC727866     | -0.027886958 | 6.291191129 | 0.316574232 |
| CLLU1OS       | -0.027260571 | 6.070024981 | 0.316699629 |
| SIN3B         | 0.043903542  | 7.232498141 | 0.316756723 |
| MAGEA3        | -0.01964449  | 6.124932913 | 0.316777813 |
| ATP1A3        | 0.042596882  | 6.652309439 | 0.316946713 |
| EPB41L4B      | -0.030892688 | 6.481953973 | 0.316989588 |
| DKFZP434I0714 | 0.027746925  | 6.144252521 | 0.317029525 |
| C20ORF175     | -0.034431464 | 6.281949687 | 0.3170874   |
| LOC647348     | -0.024006493 | 6.17219379  | 0.317127598 |
| HNRPLL        | 0.045639997  | 6.912972833 | 0.317156536 |
| HMGCS1        | 0.046374435  | 8.873573918 | 0.317193355 |
| GPR37         | -0.025175575 | 6.063725189 | 0.317290484 |
| HBQ1          | -0.027149431 | 5.976611298 | 0.317406861 |
| LOC649162     | 0.024631113  | 6.05343137  | 0.317519863 |
| NBPF11        | 0.039491607  | 7.98898905  | 0.317529086 |
| LOC646804     | 0.024550002  | 6.147796115 | 0.317540947 |
| OR11H1        | 0.019116876  | 6.043339736 | 0.31755797  |
| TRPA1         | -0.022609079 | 6.006540928 | 0.317571817 |
| C3ORF44       | -0.025954055 | 6.001663149 | 0.317605606 |
| OR5AU1        | -0.023660302 | 6.052974956 | 0.317622908 |
| LOC647283     | 0.024636543  | 5.900915649 | 0.317686675 |
| PSMF1         | 0.03781066   | 9.78295743  | 0.317811951 |
| LOC645811     | -0.025097433 | 5.979066211 | 0.317834055 |
| LOC646350     | 0.022957606  | 6.000987107 | 0.317911592 |
| LOC441795     | 0.024393536  | 6.047344035 | 0.317988935 |
| SMARCAD1      | 0.032054821  | 6.972548261 | 0.318006002 |
| CLEC12B       | -0.029175043 | 6.110803531 | 0.31800839  |
| LOC641875     | 0.025551086  | 6.017605083 | 0.318226714 |
| LOC646098     | 0.027035824  | 5.951359191 | 0.318420955 |
| LOC652821     | -0.027643141 | 6.351325962 | 0.318436495 |
| LOC90113      | -0.025841145 | 6.124013284 | 0.318853272 |
| LOC441759     | 0.028530894  | 5.971772214 | 0.318889749 |
| OR2T34        | 0.026583612  | 5.96125574  | 0.318910535 |
| CCDC34        | 0.058922923  | 7.50805864  | 0.318961438 |
| FGF23         | 0.022971004  | 6.341814625 | 0.318980775 |
| VMD2L3        | 0.024137212  | 6.059886886 | 0.319022215 |
| LOC729408     | -0.023338136 | 6.020203464 | 0.319082368 |
| THAP11        | -0.051395058 | 9.96787487  | 0.319117719 |
| SYNGR1        | 0.032992201  | 7.245363451 | 0.319283681 |
| ENPP7         | 0.02208266   | 6.132823516 | 0.319323685 |
| TCL1A         | 0.025367153  | 5.983377157 | 0.319348087 |
| GRIN2A        | -0.036813859 | 6.124814236 | 0.3193908   |
| CRABP1        | 0.029787622  | 6.013049878 | 0.31940737  |
| LOC649857     | 0.028510772  | 5.962090074 | 0.319470538 |
| UNC5A         | -0.030368589 | 5.947181353 | 0.319502631 |
| LOC644348     | 0.026453254  | 5.944047187 | 0.319561367 |

## DEG.infomation

|           |              |             |             |
|-----------|--------------|-------------|-------------|
| LOC402635 | 0.029528518  | 5.90494668  | 0.319571925 |
| ACTL7A    | 0.0259664    | 6.019613517 | 0.319587871 |
| ZNF805    | 0.036675239  | 6.987384052 | 0.319715274 |
| LOC646033 | 0.027464334  | 5.984558012 | 0.319718804 |
| LOC644827 | -0.029969774 | 5.949074847 | 0.319720286 |
| RAPGEF4   | -0.064452432 | 6.675131135 | 0.31978022  |
| C6ORF12   | -0.017035538 | 6.16577447  | 0.319924851 |
| TFAP2E    | 0.028115744  | 5.989652986 | 0.319927427 |
| MGMT      | -0.06322331  | 9.196233416 | 0.320006835 |
| LOC647359 | 0.022710688  | 6.449764327 | 0.320046832 |
| LOC645293 | 0.022726965  | 6.032298879 | 0.320053691 |
| CYP21A2   | 0.024572437  | 6.312839103 | 0.320086875 |
| LOC139116 | 0.02581821   | 5.901493774 | 0.320215389 |
| ZNF19     | -0.025391763 | 6.037970243 | 0.320300002 |
| GREB1     | 0.015659147  | 6.224691966 | 0.320392536 |
| LOC650698 | -0.029568891 | 6.303780159 | 0.32052747  |
| HIST1H4D  | 0.026100333  | 5.998372452 | 0.320537414 |
| DNAJC7    | 0.063208548  | 8.851825811 | 0.320613639 |
| SGPP1     | 0.02857859   | 6.15562451  | 0.320642113 |
| C9ORF29   | 0.030805058  | 5.988427311 | 0.320646208 |
| ZBTB24    | -0.026961035 | 7.346356618 | 0.320688184 |
| TRPV4     | 0.016791928  | 6.074159188 | 0.320714421 |
| LOC645349 | 0.022858347  | 6.254166015 | 0.320726495 |
| LOC440337 | 0.026337602  | 6.172276405 | 0.320766821 |
| GIPC2     | -0.022277374 | 6.073278066 | 0.320803255 |
| LOC388621 | -0.088919111 | 11.10045679 | 0.320961765 |
| LOC387826 | -0.025386065 | 6.213071501 | 0.320977043 |
| KRTAP4-1  | 0.02761451   | 5.989038157 | 0.32105132  |
| LOC643882 | -0.055708956 | 6.959003211 | 0.321075341 |
| OR10G4    | 0.025057226  | 5.984418017 | 0.321267552 |
| COX18     | 0.018688114  | 6.46498732  | 0.321275383 |
| LOC646908 | -0.026449539 | 6.024673596 | 0.321460153 |
| RGL2      | 0.046248441  | 7.265687465 | 0.321625285 |
| C6ORF79   | 0.025335119  | 6.004703136 | 0.321676748 |
| SCN7A     | 0.037113117  | 6.571738638 | 0.321769725 |
| LOC284801 | -0.02286897  | 6.03996766  | 0.32182165  |
| CYORF14   | 0.120905961  | 6.741261343 | 0.321871281 |
| FNDC7     | 0.022739407  | 6.033330161 | 0.322040522 |
| H1FO      | -0.078688725 | 10.52415695 | 0.322080811 |
| TTC21B    | -0.015604757 | 5.98883384  | 0.322153012 |
| LOC644814 | -0.032626357 | 6.029454458 | 0.322162967 |
| WIPF1     | -0.023573878 | 6.287122518 | 0.322168191 |
| LOC648064 | -0.022037818 | 6.130815364 | 0.322173774 |
| TAPBP     | -0.045076284 | 8.365457937 | 0.322178605 |
| OTOF      | -0.016005786 | 6.016405156 | 0.322231745 |
| HIST3H3   | -0.024667669 | 6.040500805 | 0.32234394  |
| LOC441126 | -0.027308034 | 6.371499826 | 0.32237386  |
| USP42     | -0.038647468 | 7.404835868 | 0.322426301 |
| LOC653123 | -0.028754343 | 5.956568936 | 0.322429165 |
| KRT12     | -0.025986047 | 6.093063162 | 0.322565717 |
| FLJ22269  | -0.02956401  | 5.995997503 | 0.322613283 |

## DEG.infomation

|           |              |             |             |
|-----------|--------------|-------------|-------------|
| CCNB2     | -0.036376121 | 6.090028641 | 0.322676651 |
| ATG4A     | 0.029767723  | 7.516537632 | 0.322724885 |
| LOC643580 | 0.023103499  | 6.092936948 | 0.322860016 |
| KCNN2     | -0.061344275 | 6.969789579 | 0.323024128 |
| SLITRK5   | 0.023946538  | 6.044981421 | 0.323058557 |
| FLJ44881  | -0.02322456  | 5.983756256 | 0.323088624 |
| LOC649812 | -0.028466577 | 5.977260729 | 0.323174585 |
| GPSN2     | -0.044535437 | 9.721123112 | 0.323204584 |
| DCC       | 0.022508598  | 6.045441829 | 0.323218323 |
| ZNF828    | -0.040411674 | 8.127431408 | 0.323218787 |
| MRM1      | 0.033106862  | 6.338810387 | 0.323335697 |
| LOC645304 | 0.028177548  | 6.048595832 | 0.323360607 |
| LY9       | 0.016566557  | 6.013871926 | 0.323469929 |
| LOC642528 | -0.025835523 | 6.110069799 | 0.323560816 |
| LOC653165 | 0.022638012  | 6.047321595 | 0.323576721 |
| THAP7     | 0.024041556  | 6.790699635 | 0.323642132 |
| HOMEZ     | -0.038511024 | 6.072927865 | 0.323662804 |
| KCNH7     | -0.018780813 | 5.956794268 | 0.323930202 |
| TMEFF1    | -0.027755278 | 6.32522528  | 0.323995952 |
| TNR       | 0.0239161    | 5.974351172 | 0.324021899 |
| C3ORF56   | 0.030619681  | 6.018284908 | 0.324039593 |
| FLJ45202  | 0.033147991  | 6.36396686  | 0.324058727 |
| OR4D5     | 0.022087337  | 6.061472071 | 0.324083344 |
| SULT1E1   | 0.034190614  | 6.02484885  | 0.324174139 |
| ORC1L     | -0.023055752 | 6.083845549 | 0.324287741 |
| SPANXN1   | -0.024292096 | 5.992646158 | 0.324317873 |
| PAK7      | 0.020968948  | 6.213502802 | 0.324384211 |
| CUTC      | 0.054284329  | 8.927263931 | 0.324523972 |
| LOC653539 | 0.013270784  | 6.036408584 | 0.324528024 |
| LOC651769 | 0.029403274  | 6.067957563 | 0.324548467 |
| PRICKLE3  | -0.026733692 | 6.233050718 | 0.324671404 |
| DCDC1     | 0.023688686  | 5.958213241 | 0.324696611 |
| LOC651044 | 0.02768454   | 6.08127173  | 0.32470408  |
| CRTAM     | -0.024819838 | 5.963214526 | 0.324726827 |
| LOC648066 | 0.022853945  | 6.036867218 | 0.324786975 |
| LOC652274 | 0.027344331  | 6.129851125 | 0.325055266 |
| LOC648763 | -0.018219957 | 6.039370753 | 0.32506637  |
| LOC649362 | -0.028026172 | 6.131167824 | 0.325109794 |
| RRAS2     | 0.102290148  | 8.881546452 | 0.325183566 |
| KPTN      | -0.023502295 | 6.065169191 | 0.325194358 |
| LOC644978 | 0.029954861  | 6.141394685 | 0.325296566 |
| DGKG      | 0.060460112  | 6.842119879 | 0.325527345 |
| VANGL1    | 0.026023525  | 6.194927984 | 0.325561573 |
| LOC648966 | 0.026285393  | 6.071597265 | 0.325574221 |
| MED9      | -0.062333238 | 7.638466064 | 0.325810296 |
| RBM1B     | -0.025094217 | 5.970141528 | 0.325851186 |
| ZNF333    | 0.019867414  | 6.538260419 | 0.326014405 |
| LOC644267 | 0.02506117   | 5.925494789 | 0.32607826  |
| PHACTR3   | -0.061762827 | 6.5138009   | 0.326196216 |
| LOC645099 | 0.014050771  | 6.009246709 | 0.326220035 |
| LOC728004 | -0.034985128 | 6.035977802 | 0.326386457 |



## DEG.infomation

|           |              |             |             |
|-----------|--------------|-------------|-------------|
| SIKE      | -0.029920494 | 6.12532405  | 0.326406563 |
| CTLA4     | -0.02296627  | 6.070333737 | 0.326485336 |
| LOC645956 | 0.028100744  | 6.051403111 | 0.326665562 |
| ST18      | 0.027979316  | 5.900836245 | 0.326692114 |
| TMEM75    | -0.025021953 | 6.033175508 | 0.326708957 |
| QRSL1     | 0.033342597  | 6.345757762 | 0.326854612 |
| POLQ      | 0.027995106  | 6.33098779  | 0.32686383  |
| BACE1     | 0.029228523  | 6.436051121 | 0.326925096 |
| LOC652070 | -0.02550204  | 6.002664209 | 0.327024372 |
| UBE2S     | -0.023106666 | 5.917609083 | 0.3270811   |
| ADRA2B    | 0.037729169  | 6.947571438 | 0.327128197 |
| LOC649784 | -0.023953821 | 5.999650758 | 0.327339741 |
| FLJ39660  | 0.031712112  | 6.195588028 | 0.327465259 |
| FAM90A12  | 0.020734559  | 6.001679606 | 0.327479894 |
| LOC646719 | 0.018509888  | 5.918112471 | 0.327546375 |
| LIPL2     | 0.029896196  | 6.03356279  | 0.327587412 |
| LOC731640 | -0.072927323 | 11.61919119 | 0.327643713 |
| LOC652579 | 0.024731671  | 5.949918449 | 0.327667865 |
| POLR1B    | -0.026985781 | 6.365610595 | 0.327709237 |
| LY75      | -0.02852458  | 5.920572111 | 0.327791149 |
| TNN       | -0.024785379 | 6.010986559 | 0.327821111 |
| LOC393076 | -0.028490313 | 6.158654285 | 0.32784956  |
| LOC284964 | 0.023647961  | 6.059822133 | 0.327877937 |
| LOC643237 | 0.021854979  | 5.985416643 | 0.327904605 |
| LOC647485 | -0.024004526 | 5.940417719 | 0.327984454 |
| FAM10A6   | 0.024933727  | 6.004469152 | 0.328047902 |
| LOC644554 | 0.023272176  | 6.019760242 | 0.328050886 |
| OR4K14    | 0.027199743  | 6.104611733 | 0.328232857 |
| PLXDC1    | 0.031837944  | 6.362252979 | 0.328339868 |
| SNORD48   | -0.028229701 | 6.132399003 | 0.328362088 |
| LOC387895 | -0.019244966 | 5.968785082 | 0.328376839 |
| ANRIL     | -0.022957143 | 6.042260002 | 0.328407565 |
| ATIC      | -0.050836036 | 9.952153251 | 0.328423287 |
| PPP1R2P9  | -0.022919726 | 6.032087796 | 0.32843448  |
| ZNF474    | 0.018088582  | 6.168992982 | 0.328455152 |
| HAT1      | 0.060640051  | 7.894800173 | 0.328455232 |
| KLF7      | 0.032180697  | 6.146334455 | 0.328460133 |
| LOC732150 | 0.024534339  | 6.147248585 | 0.328499744 |
| PLEKHA9   | -0.04797553  | 7.378386409 | 0.328505655 |
| DAP       | -0.046928951 | 7.758317237 | 0.328517698 |
| GPR151    | -0.026851804 | 5.977037577 | 0.328628738 |
| TMC2      | 0.032517691  | 6.072971023 | 0.328643785 |
| FLJ41766  | -0.02322405  | 6.226593674 | 0.328648199 |
| LOC649217 | -0.025833405 | 5.988148838 | 0.328786146 |
| FAM181A   | 0.023410724  | 6.088176021 | 0.328808133 |
| XCR1      | 0.017685952  | 6.131787435 | 0.328811639 |
| OR4B1     | -0.018637343 | 6.186718728 | 0.328828243 |
| LPAL2     | 0.01208495   | 5.987249959 | 0.328936434 |
| ARMC5     | 0.044825456  | 6.295169908 | 0.328952267 |
| LOC648403 | -0.02524445  | 6.130881122 | 0.329029801 |
| FLJ46154  | 0.025007116  | 5.988706807 | 0.329171863 |

## DEG.infomation

|           |              |             |             |
|-----------|--------------|-------------|-------------|
| LOC440105 | 0.027652267  | 5.941256867 | 0.329197422 |
| PCDHGA4   | -0.017885419 | 5.979678175 | 0.329229595 |
| ZNF660    | 0.034708386  | 6.455799339 | 0.329289877 |
| ZNF396    | 0.022142097  | 6.36885423  | 0.329336717 |
| MGAT3     | 0.037811649  | 6.328798913 | 0.329422715 |
| ALDH1L1   | -0.087360426 | 8.127975156 | 0.329442309 |
| ZNF542    | -0.034712487 | 6.231870633 | 0.329538178 |
| LOC644058 | -0.023216685 | 5.964339928 | 0.329551905 |
| GSG2      | -0.024695311 | 6.025187276 | 0.329570731 |
| AGPS      | -0.046086851 | 7.751615357 | 0.32959666  |
| SART3     | 0.038996899  | 6.482728072 | 0.329608358 |
| AMOTL1    | -0.028982703 | 6.242501819 | 0.329612944 |
| LOC653206 | -0.017737052 | 6.130819409 | 0.329752839 |
| AMAC1L2   | 0.015868019  | 6.149053849 | 0.329775035 |
| C19ORF26  | -0.040663294 | 6.080345128 | 0.329776006 |
| TBC1D10A  | -0.042150251 | 6.287276913 | 0.329839871 |
| ALS2CR14  | -0.050899788 | 7.439686323 | 0.329893301 |
| LOC646740 | 0.023017885  | 6.084175772 | 0.329963779 |
| LOC402096 | -0.023651997 | 5.930691159 | 0.329979082 |
| KIAA1862  | -0.044939917 | 7.160978936 | 0.330020029 |
| PFKL      | -0.03431128  | 7.165083112 | 0.330056036 |
| LOC400499 | 0.019910715  | 6.145258592 | 0.330063822 |
| AIM1L     | -0.01535149  | 5.997159698 | 0.33021306  |
| TRPT1     | 0.054016745  | 10.23400581 | 0.330214487 |
| LOC642576 | 0.023799495  | 6.127305666 | 0.330217402 |
| SMAD6     | 0.080565247  | 8.834377552 | 0.330291239 |
| CXCL5     | -0.017047571 | 6.014718124 | 0.330443739 |
| CYP4F12   | -0.043187162 | 6.545557071 | 0.330490227 |
| RANGRF    | 0.058455275  | 6.429071645 | 0.330551255 |
| LOC644682 | -0.023845602 | 5.984940962 | 0.330609326 |
| FMO6P     | 0.025477429  | 6.542596643 | 0.330624842 |
| IL20RB    | 0.026147457  | 6.184904102 | 0.330667517 |
| LOC645663 | -0.028016775 | 6.187992291 | 0.330726262 |
| WDR3      | 0.023814049  | 6.21691112  | 0.330944537 |
| LOC647247 | -0.028564579 | 5.894885031 | 0.330994674 |
| ASTN2     | 0.028531639  | 6.392018946 | 0.331019725 |
| FAM14B    | 0.042983503  | 6.312046322 | 0.33105042  |
| LOC400696 | -0.032372747 | 5.926538239 | 0.331052821 |
| SCD5      | -0.032702251 | 7.213534977 | 0.331134061 |
| LOC650155 | -0.025524977 | 6.316472959 | 0.331168072 |
| OR2B3P    | 0.016970772  | 6.149803398 | 0.331202647 |
| LOC642684 | -0.022185779 | 6.149762287 | 0.331292125 |
| PRB3      | 0.018055983  | 6.177216294 | 0.331463258 |
| DHODH     | 0.023724425  | 6.27179714  | 0.331525123 |
| RGS9      | -0.019108833 | 5.90510654  | 0.33152953  |
| KSR2      | 0.01480769   | 6.229147467 | 0.331544184 |
| NUDT16    | 0.053070942  | 8.369058056 | 0.331686824 |
| RHEBL1    | 0.039825464  | 6.103990808 | 0.331730216 |
| HPD       | -0.034774314 | 6.002140233 | 0.33181155  |
| LOC652179 | -0.033204423 | 6.026474399 | 0.331871248 |
| DDEF1     | 0.053330578  | 8.776972992 | 0.331945597 |

## DEG.infomation

|            |              |             |             |
|------------|--------------|-------------|-------------|
| LOC440104  | 0.024722648  | 6.066577986 | 0.331974322 |
| EID3       | -0.041139817 | 6.150316329 | 0.332083259 |
| ITGA4      | -0.026360819 | 6.261202762 | 0.332143564 |
| ANKS6      | -0.023265697 | 5.947175652 | 0.332146628 |
| HS3ST6     | -0.026906396 | 6.063634655 | 0.332176042 |
| LOC645504  | 0.02330006   | 6.054403018 | 0.332233297 |
| ZNF595     | 0.026485498  | 5.807034217 | 0.332303053 |
| LOC644816  | 0.03061639   | 6.434085623 | 0.332424883 |
| FCRL3      | 0.017032043  | 6.191733875 | 0.332525645 |
| LOC651195  | -0.021547483 | 6.05413189  | 0.332552373 |
| MAN1A1     | -0.044235593 | 7.507466565 | 0.33257444  |
| GPR142     | -0.026487524 | 6.079289261 | 0.332600308 |
| OR2A1      | -0.020843714 | 6.306269085 | 0.332674785 |
| RGAG4      | 0.027825881  | 6.334096147 | 0.332684396 |
| FAM90A6P   | 0.013158649  | 6.110684231 | 0.332850622 |
| TNP2       | -0.027609109 | 5.890890242 | 0.332882331 |
| FLJ25076   | -0.024680006 | 5.924228715 | 0.332916502 |
| TMEM207    | 0.048235705  | 7.034199049 | 0.333006626 |
| PDPR       | -0.06276336  | 7.872608546 | 0.333057682 |
| LOC645458  | 0.018982745  | 5.98515663  | 0.333064475 |
| TCEAL1     | 0.034122915  | 7.465753498 | 0.333076102 |
| FGFBP3     | 0.027131122  | 6.218866293 | 0.333088542 |
| TEKT5      | 0.021714242  | 5.951347888 | 0.333104506 |
| ZNF553     | -0.030274695 | 6.072440169 | 0.333179958 |
| OR13D1     | -0.027828697 | 5.944062306 | 0.333183671 |
| C9ORF97    | -0.037412746 | 6.895977501 | 0.333198308 |
| LOC646731  | -0.023609303 | 6.005872945 | 0.333293247 |
| CFC1       | -0.018736396 | 6.107086842 | 0.33335578  |
| DYDC2      | -0.026323087 | 6.296032768 | 0.333380106 |
| S100A7L2   | -0.02547177  | 6.424303437 | 0.333433812 |
| SLC23A1    | 0.025514711  | 6.548423598 | 0.333493645 |
| LOC643423  | 0.03327566   | 6.502675687 | 0.333584165 |
| MYF6       | -0.018690796 | 6.137470145 | 0.333741025 |
| FAM22G     | -0.025119342 | 5.960283241 | 0.333764989 |
| NR1H4      | 0.024720223  | 6.108445154 | 0.333771957 |
| SLC35F5    | 0.05302216   | 8.056322035 | 0.333910201 |
| ZNF449     | 0.02393214   | 6.177164266 | 0.333985709 |
| UROC1      | -0.028757348 | 6.081455512 | 0.334122415 |
| LOC642950  | 0.028541525  | 6.031725052 | 0.334129272 |
| CABP5      | 0.026383199  | 5.915404481 | 0.334135305 |
| LOC646096  | -0.027279585 | 6.019094387 | 0.334136458 |
| CDH12P     | 0.026881692  | 6.105385146 | 0.334267126 |
| OLFM3      | 0.028329044  | 5.887633543 | 0.33430832  |
| FBLN1      | -0.091059618 | 9.38947624  | 0.334353912 |
| PAGE4      | 0.029053705  | 5.992620747 | 0.334356951 |
| RGPD5      | 0.012006702  | 6.046221697 | 0.334380749 |
| HIST2H2AA3 | -0.067103525 | 9.123666983 | 0.33442661  |
| PPP4R4     | -0.0161103   | 5.989369267 | 0.334428572 |
| LOC136288  | 0.025953053  | 6.040309352 | 0.334478225 |
| DLX3       | 0.033080583  | 6.223296216 | 0.334488985 |
| LOC728504  | 0.025575802  | 5.984347679 | 0.334619101 |

## DEG.infomation

|           |              |             |             |
|-----------|--------------|-------------|-------------|
| LOC645279 | 0.025802801  | 6.090070364 | 0.334621206 |
| NDUFA4    | 0.03892307   | 14.12959995 | 0.334669213 |
| TTLL9     | 0.030603077  | 6.14110716  | 0.334828896 |
| KLK15     | 0.014828612  | 6.029506018 | 0.334832971 |
| LHFPL3    | 0.036579703  | 6.626607089 | 0.334853914 |
| LOC649270 | 0.014424279  | 6.160253077 | 0.334899978 |
| RBMY1F    | 0.026928009  | 5.981313133 | 0.334958876 |
| BPESC1    | 0.032772631  | 6.127713565 | 0.334964334 |
| MRPL28    | -0.036751469 | 7.936578317 | 0.334967346 |
| HMGCR     | 0.045622091  | 7.714368328 | 0.334971643 |
| AP1M2     | -0.039626955 | 6.05344075  | 0.33498535  |
| AVIL      | 0.025688635  | 6.480376187 | 0.335001845 |
| IQCB1     | -0.023309254 | 6.816095389 | 0.335066396 |
| DNCL2A    | 0.022835591  | 6.04055306  | 0.335102118 |
| DIO1      | -0.015038369 | 5.944034349 | 0.335111688 |
| OTUD6B    | 0.042858912  | 7.461771201 | 0.335115667 |
| LOC728403 | 0.027590728  | 6.0457143   | 0.335200057 |
| LOC653115 | 0.054112517  | 6.688055076 | 0.335265896 |
| LOC641929 | 0.024082938  | 6.066519588 | 0.335396621 |
| LOC645172 | 0.024670096  | 6.125239013 | 0.335442063 |
| KIAA1772  | 0.045365958  | 6.482459338 | 0.335557247 |
| TAAR9     | -0.026578034 | 6.114550182 | 0.335614635 |
| LOC642702 | 0.023671062  | 6.010140068 | 0.335636148 |
| JDP2      | -0.047825029 | 6.480785483 | 0.335715829 |
| ITGB8     | -0.026022015 | 6.105870785 | 0.335785578 |
| C19ORF62  | 0.032935384  | 8.856083005 | 0.335956206 |
| NPBWR1    | -0.027060635 | 5.952912837 | 0.336225275 |
| SNAP91    | 0.15629893   | 7.054277172 | 0.33627566  |
| TFR2      | 0.02432238   | 6.067565767 | 0.336317748 |
| CCR10     | -0.026420571 | 6.249919749 | 0.336451181 |
| KIF23     | 0.017829565  | 6.071707584 | 0.336517518 |
| PLD4      | -0.030831035 | 6.208321993 | 0.336620271 |
| LOC646933 | 0.024084676  | 5.908235563 | 0.33666084  |
| GBX2      | -0.023656661 | 6.315344604 | 0.336663684 |
| HCG22     | -0.023605896 | 6.08988089  | 0.336689352 |
| LOC441282 | -0.015638682 | 6.052488657 | 0.336832403 |
| COL11A2   | -0.015819385 | 6.130452667 | 0.33692481  |
| ARGFX     | -0.021063793 | 5.925412655 | 0.337040194 |
| LOC648600 | -0.027636549 | 6.21072456  | 0.337040313 |
| KRT84     | -0.023683132 | 6.125503905 | 0.337044684 |
| FAM7A2    | 0.01409558   | 6.011828357 | 0.337074201 |
| LOC732416 | 0.025051653  | 6.221094719 | 0.337103611 |
| FLJ44817  | 0.02517932   | 5.95468815  | 0.337174726 |
| XRCC5     | 0.043575375  | 8.132254273 | 0.337198911 |
| SULT1C2   | -0.020200485 | 6.040477814 | 0.337251581 |
| LOC648364 | -0.050457733 | 6.023332818 | 0.337347888 |
| NUP155    | -0.024494031 | 7.163783879 | 0.337348916 |
| LRP6      | 0.028397912  | 6.516539738 | 0.337385206 |
| COPS7A    | -0.034553047 | 10.64070893 | 0.337414645 |
| OR10R2    | -0.02572522  | 6.021086883 | 0.337566991 |
| LOC392215 | 0.019735941  | 5.985868781 | 0.337620888 |

## DEG.infomation

|           |              |             |             |
|-----------|--------------|-------------|-------------|
| TAGAP     | -0.014589542 | 6.019490681 | 0.337675311 |
| SLC6A4    | -0.022057541 | 6.04141036  | 0.337747971 |
| LOC651777 | -0.030297354 | 6.221780668 | 0.337753881 |
| B3GALT1   | 0.023821599  | 6.260705204 | 0.337768591 |
| PLXNB3    | -0.020278578 | 6.055907293 | 0.337780493 |
| LOC391276 | -0.022310382 | 5.999105444 | 0.337799089 |
| LOC651268 | -0.026551268 | 6.100734657 | 0.337816585 |
| VCL       | 0.061651195  | 11.0075903  | 0.337942846 |
| C4ORF37   | -0.016818459 | 6.124328168 | 0.337985081 |
| CLECL1    | -0.025831799 | 6.026133926 | 0.338002182 |
| LOC642265 | -0.02563601  | 6.067424849 | 0.338107637 |
| HILS1     | -0.026493904 | 6.202544444 | 0.338124872 |
| APBA2     | 0.022222869  | 6.004740154 | 0.338181498 |
| FBXO41    | 0.020622207  | 6.225998392 | 0.338284265 |
| CLGN      | 0.077541996  | 7.547365498 | 0.338296283 |
| CXORF58   | -0.022918311 | 5.976999411 | 0.338312964 |
| ERAF      | -0.024395308 | 6.113815558 | 0.338446554 |
| DMXL1     | 0.053472018  | 6.406761165 | 0.338449134 |
| LINS1     | -0.018402969 | 6.334455165 | 0.338638501 |
| CAMKK1    | 0.020524535  | 6.23566792  | 0.338702501 |
| LOC647336 | -0.027283529 | 6.006606935 | 0.338743746 |
| RPS25     | -0.041291585 | 14.16950304 | 0.338854278 |
| LOC645194 | -0.024104364 | 6.037190568 | 0.339135641 |
| LOC651381 | 0.025408047  | 5.937402824 | 0.339213076 |
| LOC645879 | 0.025008981  | 6.054576033 | 0.33930658  |
| ADNP2     | 0.043222543  | 7.772795013 | 0.339322068 |
| LOC652160 | 0.027446312  | 6.066721745 | 0.339407557 |
| UGT1A9    | -0.023418534 | 6.033041223 | 0.339456301 |
| ATP2A3    | 0.02655529   | 6.191172733 | 0.339907645 |
| ECHDC3    | -0.075732511 | 10.39580672 | 0.339952019 |
| SPCS1     | 0.050137639  | 11.23858761 | 0.339952419 |
| NPY5R     | 0.019305292  | 6.108181436 | 0.339977505 |
| LOC126520 | 0.035929925  | 6.179316657 | 0.340049543 |
| LOC652405 | -0.023559583 | 5.946675532 | 0.340083796 |
| C16ORF55  | -0.02612414  | 5.942260371 | 0.340145775 |
| LOC646855 | 0.032222448  | 6.108976098 | 0.340203513 |
| LOC284701 | 0.014045682  | 6.108497257 | 0.340235693 |
| SHD       | -0.022074481 | 6.024762153 | 0.340270965 |
| KAT5      | 0.028441391  | 6.617776621 | 0.34030412  |
| LOC650475 | -0.023926676 | 6.087841506 | 0.340312113 |
| PIK3C3    | 0.045613227  | 6.611582363 | 0.340395952 |
| KCTD7     | 0.030089317  | 6.215346983 | 0.340448533 |
| LOC730076 | 0.027146656  | 5.968970558 | 0.340647089 |
| SST       | -0.02655303  | 5.908990432 | 0.340882141 |
| GLYAT     | 0.01645625   | 6.026007068 | 0.340882608 |
| MGC24103  | -0.045072814 | 6.707148639 | 0.341055005 |
| LOC644057 | 0.023918104  | 6.213347716 | 0.341058982 |
| OR5211    | -0.023080506 | 6.043402578 | 0.341162502 |
| LOC645333 | -0.023706902 | 5.9603914   | 0.341278448 |
| LOC649092 | -0.022133452 | 6.076620991 | 0.341323053 |
| RPA4      | -0.026392418 | 6.259541447 | 0.341383961 |

## DEG.infomation

|           |              |             |             |
|-----------|--------------|-------------|-------------|
| LOC653249 | 0.015256578  | 6.017441138 | 0.341402224 |
| LOC641908 | 0.020586855  | 6.061342356 | 0.341468354 |
| LOC651031 | -0.022835719 | 5.972795837 | 0.341667428 |
| SMA4      | -0.047874237 | 7.135640815 | 0.341719302 |
| LOC648963 | 0.027667972  | 6.1868649   | 0.341754988 |
| LOC645659 | 0.02870801   | 6.38853425  | 0.341793589 |
| GYPA      | -0.020271031 | 5.891187368 | 0.341828187 |
| RPE       | 0.022815387  | 6.512381451 | 0.341881255 |
| OR8K3     | -0.025773452 | 5.955283298 | 0.341902829 |
| LOC653073 | 0.022623566  | 6.438067073 | 0.341922352 |
| DHRS1     | 0.061390234  | 8.357512519 | 0.341928825 |
| LOC645179 | 0.025218384  | 5.961867998 | 0.342023848 |
| LOC442057 | 0.025422284  | 6.325435963 | 0.34204355  |
| LOC401498 | -0.024454943 | 5.913495987 | 0.342102313 |
| DEC1      | -0.027679635 | 5.985958163 | 0.342207839 |
| TSPAN33   | 0.047963724  | 7.790561445 | 0.342241121 |
| LOC731898 | 0.026174793  | 6.027729661 | 0.342287125 |
| MICAL3    | -0.024701554 | 6.041114814 | 0.342329449 |
| CRHR2     | -0.023144239 | 5.935659736 | 0.342501257 |
| FBXO43    | -0.017861937 | 6.110395505 | 0.342527695 |
| CASKIN2   | -0.037286178 | 6.14382936  | 0.342536853 |
| OLA1      | 0.015401089  | 6.112605416 | 0.342547471 |
| RPL23AP7  | 0.058414187  | 7.606581853 | 0.342609314 |
| ALOX12B   | -0.026171986 | 6.009247777 | 0.342640882 |
| LOC652086 | -0.021917909 | 6.037530536 | 0.34272735  |
| LOC285299 | -0.025358077 | 6.11242104  | 0.342752016 |
| LOC648329 | -0.023781457 | 6.118223788 | 0.342752111 |
| MEP1A     | 0.026437794  | 6.258480469 | 0.34279132  |
| TMEM175   | -0.060574472 | 8.446387568 | 0.34281427  |
| FLJ35773  | 0.024959357  | 6.159331423 | 0.342831087 |
| OR51A4    | -0.027452738 | 5.865191205 | 0.342869761 |
| LNP1      | 0.035677802  | 6.041669863 | 0.342934099 |
| UTP20     | -0.013732824 | 6.073375428 | 0.342949874 |
| LOC644285 | -0.025901775 | 6.012248533 | 0.343046855 |
| LOC650509 | 0.023291291  | 6.225330031 | 0.343082531 |
| LOC389370 | -0.024961093 | 6.111707529 | 0.34313197  |
| LOC389813 | 0.019857963  | 6.057480364 | 0.343177607 |
| HSD11B2   | 0.029546253  | 6.212853176 | 0.343199313 |
| LOC138652 | -0.021493899 | 6.177260069 | 0.343346964 |
| MAGEA9    | 0.023917432  | 6.043094304 | 0.34338263  |
| LOC728565 | -0.042379556 | 7.155209008 | 0.343434007 |
| LOC389457 | 0.022420802  | 6.118861583 | 0.343489296 |
| IFIT1L    | -0.025357255 | 5.939372453 | 0.343662082 |
| LOC648796 | 0.023917403  | 6.062187509 | 0.343669396 |
| SLC6A3    | -0.024672277 | 6.0311064   | 0.343878665 |
| ZNF385C   | 0.024728571  | 6.002232422 | 0.344152983 |
| LOC646492 | 0.027776066  | 6.017256528 | 0.344184525 |
| LOC652743 | -0.025892615 | 6.005963186 | 0.344228184 |
| LOC644090 | 0.023954453  | 6.109208505 | 0.344304746 |
| DPH1      | 0.026923416  | 6.56598345  | 0.344395708 |
| LOC645317 | -0.03672493  | 12.52716789 | 0.344456581 |

## DEG.infomation

|           |              |             |             |
|-----------|--------------|-------------|-------------|
| LOC652529 | -0.025622562 | 6.018272881 | 0.344503967 |
| BTF3L4    | 0.037738883  | 8.427279503 | 0.344586343 |
| LOC647154 | -0.024744444 | 6.016571283 | 0.344616013 |
| LOC440917 | -0.020890876 | 6.01552335  | 0.344637734 |
| CDX1      | -0.026086426 | 6.001035988 | 0.344740586 |
| LOC647960 | 0.021860578  | 6.054377063 | 0.344803252 |
| LOC728103 | 0.024405689  | 5.966165417 | 0.34484944  |
| MUC4      | 0.016481843  | 6.071782506 | 0.344853375 |
| ERICH1    | 0.038325284  | 8.098630511 | 0.344997685 |
| NEDD4     | -0.017950924 | 6.526212304 | 0.345058117 |
| DEFA6     | -0.031625188 | 5.866612839 | 0.345200139 |
| OR6C65    | 0.019890757  | 6.046035074 | 0.345230732 |
| PRLR      | 0.02170855   | 6.072809193 | 0.345421788 |
| EEFSEC    | -0.028942888 | 6.498887091 | 0.34554052  |
| CASP8AP2  | -0.021910651 | 5.913834025 | 0.345604652 |
| LOC642347 | 0.024244872  | 6.171139352 | 0.345604761 |
| KCNJ14    | -0.015744238 | 6.225536489 | 0.345635286 |
| OPRK1     | -0.023755869 | 6.261464969 | 0.345650435 |
| OR4A15    | 0.032008277  | 6.142763475 | 0.345651909 |
| LOC641311 | 0.025554518  | 6.002362391 | 0.345695548 |
| MAGEA10   | -0.016873245 | 6.043355133 | 0.345793911 |
| LOC650185 | 0.021108913  | 6.170534877 | 0.345867148 |
| PRPF3     | -0.066373435 | 8.152009117 | 0.345907514 |
| BMP3      | -0.033780056 | 6.134004126 | 0.346053019 |
| LOC648480 | 0.027637857  | 6.002274412 | 0.346066571 |
| WDR12     | 0.030684669  | 8.450875311 | 0.346097431 |
| SLC5A9    | 0.024645125  | 6.08004045  | 0.346131346 |
| PSG2      | 0.02009296   | 5.999281167 | 0.346184407 |
| LOC729837 | 0.027441244  | 6.386985923 | 0.346206264 |
| CYP17A1   | 0.025437496  | 6.08038229  | 0.34623149  |
| KRT15     | -0.024311057 | 6.060479009 | 0.346302789 |
| FAM46D    | -0.024358197 | 5.953057818 | 0.346321853 |
| RFX6      | -0.023605405 | 6.087086112 | 0.346379782 |
| CHST5     | 0.020964201  | 6.012999955 | 0.346650724 |
| LOC645636 | 0.02209948   | 6.200908957 | 0.34666385  |
| GPC2      | 0.034760204  | 6.246379964 | 0.346828344 |
| HSPA4     | 0.069128204  | 8.889719943 | 0.346941931 |
| DVL1      | 0.022430799  | 6.414296095 | 0.346969379 |
| C11ORF84  | -0.038935423 | 6.006098633 | 0.347009729 |
| LOC652805 | -0.028484471 | 5.99220899  | 0.347122251 |
| SPIN2A    | 0.025284898  | 6.141397065 | 0.347134844 |
| GRIN1     | 0.023108694  | 6.563634343 | 0.347139421 |
| LOC652566 | 0.025620084  | 6.207089414 | 0.34715357  |
| CEP192    | 0.057753137  | 7.414536197 | 0.3473387   |
| APOBEC1   | 0.024792667  | 6.154499079 | 0.347375603 |
| USP51     | 0.026688867  | 6.055497216 | 0.347521983 |
| METTL7A   | -0.088422968 | 7.943516966 | 0.347624671 |
| LOC641802 | -0.029399475 | 6.090508999 | 0.347664975 |
| LOC653591 | 0.025822396  | 6.202486575 | 0.347908514 |
| C1ORF38   | -0.023815425 | 6.110858534 | 0.347909381 |
| FAM96A    | 0.048194691  | 9.8338156   | 0.348005194 |

## DEG.infomation

|           |              |             |             |
|-----------|--------------|-------------|-------------|
| FGF16     | 0.024605752  | 5.897903235 | 0.34801939  |
| LOC391282 | 0.016631685  | 5.920687493 | 0.348081267 |
| LOC644099 | -0.02332239  | 6.0390888   | 0.34812984  |
| PDE8B     | 0.072673978  | 7.006019791 | 0.348180809 |
| KNG1      | -0.025243569 | 6.050037722 | 0.348203536 |
| SLC25A10  | -0.064592463 | 6.871485315 | 0.348288784 |
| DAZ4      | 0.014703146  | 6.081040873 | 0.348289349 |
| DDA1      | -0.039085347 | 10.59721215 | 0.348341023 |
| TCF19     | -0.018715569 | 6.096619518 | 0.348377222 |
| LOC441261 | -0.02699326  | 5.939718691 | 0.34838464  |
| LOC731444 | 0.025392973  | 6.175932635 | 0.348405731 |
| LOC284577 | 0.023780357  | 6.18732976  | 0.34844098  |
| ZNF804B   | -0.023353044 | 5.985362231 | 0.348476501 |
| LOC643006 | 0.021875973  | 6.013322425 | 0.348686691 |
| GPR144    | 0.024901991  | 6.009449014 | 0.348732914 |
| LOC402117 | -0.025368638 | 5.962180294 | 0.348792941 |
| CC2D1B    | -0.024691332 | 6.501263522 | 0.348879036 |
| CD7       | -0.025911311 | 6.260246364 | 0.348883365 |
| ROPN1     | -0.063094097 | 6.726477436 | 0.349074676 |
| C18ORF45  | 0.032854039  | 6.354147053 | 0.349139166 |
| MFRP      | 0.023953976  | 5.923386883 | 0.349193656 |
| NAPSB     | 0.032637681  | 6.341983587 | 0.349286928 |
| LOC440934 | -0.048483227 | 6.450054163 | 0.349332357 |
| MMP7      | -0.01736898  | 6.004360577 | 0.349400473 |
| LOC650298 | 0.061609983  | 7.854982224 | 0.349484146 |
| NEUROD4   | 0.024060979  | 6.072363444 | 0.349490771 |
| CCDC28B   | -0.058353727 | 7.830772896 | 0.349561176 |
| HLXB9     | -0.026748012 | 6.157621797 | 0.349586561 |
| LOC727778 | 0.024557471  | 5.924774258 | 0.34966834  |
| LOC441249 | 0.023911313  | 6.128007983 | 0.349681283 |
| C7ORF34   | 0.023791714  | 5.963929773 | 0.34968773  |
| CLDN4     | 0.031852695  | 6.162989108 | 0.349852942 |
| SQLE      | -0.04222153  | 7.038982763 | 0.349891134 |
| OR2W3     | -0.023051251 | 6.220898485 | 0.349897691 |
| ANKRD21   | 0.023736063  | 5.937364718 | 0.349987949 |
| GRHL1     | 0.014740912  | 6.081766089 | 0.349997679 |
| OTOP2     | 0.024963425  | 6.034322236 | 0.349997903 |
| LOC644043 | 0.02476267   | 6.236811383 | 0.350063805 |
| LOC653917 | 0.024082904  | 6.246825334 | 0.350066297 |
| LOC649546 | 0.02054737   | 6.018650348 | 0.350118615 |
| FLJ16171  | -0.023500366 | 5.910098696 | 0.350177928 |
| RNF32     | 0.014303548  | 6.01243129  | 0.350271236 |
| CLRN3     | -0.024161384 | 6.21805648  | 0.350339996 |
| CLPX      | 0.033326852  | 8.358676204 | 0.350390495 |
| LOC648039 | 0.021582548  | 6.229771681 | 0.350402036 |
| GATAD2B   | 0.031501524  | 7.764082    | 0.350416269 |
| FMN2      | 0.026391502  | 6.018652368 | 0.350488702 |
| LOC653623 | 0.023924795  | 6.153200159 | 0.350510104 |
| LOC651979 | 0.023808785  | 6.275065351 | 0.35059896  |
| HAP1      | -0.014629464 | 6.116763052 | 0.350639912 |
| RLBP1     | 0.025036548  | 6.115254938 | 0.350712817 |



## DEG.infomation

|           |              |             |             |
|-----------|--------------|-------------|-------------|
| LOC654134 | -0.021879118 | 5.888848487 | 0.350728655 |
| SNF8      | -0.062233041 | 8.487902122 | 0.350872766 |
| CRISP1    | 0.01611467   | 5.926887883 | 0.351042177 |
| LOC644975 | -0.02259662  | 6.055439329 | 0.351133862 |
| LOC401876 | 0.02067634   | 6.11894034  | 0.351142577 |
| LOC728832 | -0.020963955 | 6.049336668 | 0.35117373  |
| C6ORF170  | -0.040094771 | 7.248603887 | 0.351188383 |
| SNCB      | -0.014278969 | 5.99882442  | 0.35119985  |
| LOC643355 | 0.026412397  | 6.066643144 | 0.351253232 |
| PRPF38A   | 0.020675932  | 6.800941368 | 0.351345678 |
| DDX47     | 0.032774618  | 8.913337015 | 0.351359611 |
| LYCAT     | -0.062177163 | 8.834160235 | 0.351415077 |
| LOC730027 | 0.02911624   | 6.158532995 | 0.351621289 |
| ZNF786    | -0.062946918 | 9.122847606 | 0.351684466 |
| LOC648700 | 0.023422364  | 6.050414512 | 0.351706618 |
| GTF3C4    | -0.029110551 | 6.082996804 | 0.351712146 |
| HMHB1     | 0.028845481  | 6.034986133 | 0.35175752  |
| SFT2D2    | -0.024120962 | 6.102865167 | 0.35187184  |
| CRYGD     | -0.021876229 | 5.961394525 | 0.351880343 |
| GOSR1     | -0.023273358 | 6.706884823 | 0.352081975 |
| C6ORF191  | -0.022246745 | 6.05841483  | 0.35209465  |
| PROC      | 0.022712546  | 5.973470023 | 0.352293676 |
| TMEM131   | -0.051965156 | 9.868459795 | 0.352368838 |
| LOC643152 | -0.023868238 | 6.001317304 | 0.352484009 |
| CCDC63    | -0.021916156 | 6.091292212 | 0.352675551 |
| LOC400707 | 0.030929161  | 6.05593395  | 0.35287495  |
| LOC649723 | 0.032472536  | 5.894266364 | 0.352901695 |
| ZNF670    | 0.018925578  | 6.147765847 | 0.35291778  |
| TLE2      | -0.045590247 | 8.195251987 | 0.352927002 |
| LOC442283 | 0.025510093  | 6.176628711 | 0.353046602 |
| LOC644059 | 0.024326053  | 5.977377414 | 0.353075332 |
| PTF1A     | -0.026440476 | 5.97842784  | 0.353216674 |
| LOC644845 | -0.025015538 | 6.140727551 | 0.353315774 |
| LOC642313 | 0.015269339  | 6.103647444 | 0.353475964 |
| MRPL2     | 0.05956666   | 8.201069247 | 0.35395809  |
| SEPHS2    | -0.042000061 | 8.078853467 | 0.354002188 |
| B3GNL1    | 0.028043019  | 6.35769895  | 0.354090355 |
| LOC644234 | -0.023682352 | 6.190845177 | 0.354126644 |
| FLJ43806  | 0.024998737  | 6.0560374   | 0.354199269 |
| DHDH      | 0.020984555  | 6.157911247 | 0.354238223 |
| OR2A14    | -0.02604685  | 6.139714095 | 0.354335101 |
| LOC440341 | -0.046157508 | 8.746269407 | 0.354355269 |
| UBA7      | -0.049706817 | 7.796084834 | 0.35441554  |
| LOC644319 | 0.02284623   | 6.15450139  | 0.354476755 |
| ITPK1     | 0.051145044  | 8.244418931 | 0.354609231 |
| ICAM4     | 0.015434169  | 6.109165255 | 0.354673355 |
| KRT222P   | 0.025862538  | 6.086011701 | 0.354686727 |
| LOC642985 | 0.018774318  | 6.071509408 | 0.354723212 |
| SP8       | -0.014527419 | 6.171882183 | 0.354736642 |
| SHH       | 0.029854929  | 6.273192755 | 0.35498481  |
| FOXD1     | 0.021931657  | 5.975531699 | 0.354989456 |

## DEG.infomation

|           |              |             |             |
|-----------|--------------|-------------|-------------|
| LOC644044 | 0.024025205  | 6.264933595 | 0.355145578 |
| KCNJ3     | 0.025972314  | 6.02227007  | 0.355166497 |
| LOC651668 | -0.02126832  | 6.045502695 | 0.35519252  |
| LOC653759 | -0.023359082 | 5.935180365 | 0.355313939 |
| LOC652793 | -0.024939998 | 5.997027648 | 0.355349721 |
| MEP1B     | 0.025909464  | 6.318286797 | 0.355399445 |
| LOC728116 | -0.026446085 | 6.126867437 | 0.355421889 |
| MRPL42    | 0.035233722  | 7.721556721 | 0.355447753 |
| LOC285095 | 0.023055871  | 6.154157341 | 0.355462718 |
| LOC649150 | 0.082413955  | 11.69313087 | 0.355590586 |
| LOC402641 | 0.022053992  | 6.0427596   | 0.355662183 |
| CHD8      | 0.066419342  | 8.067620239 | 0.355830902 |
| SERAC1    | 0.017829911  | 6.332121324 | 0.355965968 |
| LOC441874 | 0.023196686  | 6.048815577 | 0.355996201 |
| LOC390877 | 0.021857335  | 6.098569589 | 0.355999982 |
| BLID      | 0.02384983   | 6.104495199 | 0.356071401 |
| NOL10     | 0.027115769  | 6.82435917  | 0.35609212  |
| HTR7      | -0.019279689 | 6.193636219 | 0.356179199 |
| LOC340094 | 0.024192405  | 6.144119773 | 0.35620253  |
| ISCA2     | -0.037662687 | 8.120531638 | 0.356319195 |
| RTN2      | 0.025191253  | 7.086421112 | 0.356408133 |
| AVPI1     | -0.058398358 | 9.277582    | 0.356454857 |
| LOC646920 | 0.023756426  | 6.205507366 | 0.356526963 |
| TRHR      | -0.021508966 | 6.050578379 | 0.356749617 |
| ASCL3     | 0.021308459  | 6.044133795 | 0.356751877 |
| H2AFB1    | -0.022996737 | 6.097444871 | 0.356755756 |
| SLC25A32  | -0.028832476 | 6.12301757  | 0.356761715 |
| KCTD10    | -0.065229042 | 8.002420833 | 0.356842046 |
| TRIM13    | -0.04296233  | 7.880798138 | 0.356892461 |
| LOC642939 | 0.022900085  | 5.992893701 | 0.356897027 |
| CHORDC1   | -0.045030787 | 6.719262612 | 0.35696539  |
| LOC648684 | -0.02535016  | 6.424290263 | 0.356971358 |
| PEX12     | 0.016380443  | 6.111247522 | 0.357116234 |
| IGF1R     | 0.039297808  | 6.467205312 | 0.357123316 |
| LOC653867 | -0.024189896 | 6.128723138 | 0.357234366 |
| CD19      | -0.02832455  | 6.080454936 | 0.357309926 |
| TNNI2     | -0.025932692 | 5.995036466 | 0.35731397  |
| LOC651987 | -0.027016974 | 6.201697434 | 0.357419118 |
| TGM7      | 0.034427167  | 6.234507304 | 0.357489726 |
| LOC343296 | 0.022416642  | 6.126919027 | 0.357503845 |
| OTOS      | -0.020491652 | 5.951194784 | 0.357524884 |
| UBQLN3    | -0.025503486 | 6.626488354 | 0.357592559 |
| LOC646946 | 0.021148585  | 6.011326767 | 0.357692723 |
| SLC43A1   | -0.039462407 | 6.125776003 | 0.357783811 |
| SH3GL3    | 0.024268221  | 6.067647059 | 0.357879137 |
| LOC729957 | -0.020640167 | 6.018940756 | 0.35788257  |
| FLJ40504  | -0.029387071 | 6.278734849 | 0.357899086 |
| FLJ31945  | 0.017816772  | 6.118168843 | 0.357910034 |
| EIF5B     | -0.066401334 | 9.499048962 | 0.357924416 |
| ESR2      | 0.016841714  | 6.064079052 | 0.358054029 |
| LOC255025 | 0.030472055  | 6.002412626 | 0.358370644 |

## DEG.infomation

|           |              |             |             |
|-----------|--------------|-------------|-------------|
| LOC644421 | 0.020927667  | 6.216662832 | 0.358551598 |
| SPSB4     | 0.03543124   | 6.174124413 | 0.358651827 |
| LECT2     | 0.028264996  | 6.010585341 | 0.35872801  |
| MGC13005  | 0.018986189  | 6.135035359 | 0.358731181 |
| LOC642680 | 0.023209478  | 5.983183299 | 0.358860049 |
| DLEU2     | 0.016304791  | 6.123679098 | 0.35887317  |
| FHL1      | 0.101142042  | 12.39710839 | 0.358874207 |
| C2ORF58   | 0.033260144  | 6.123647448 | 0.358885093 |
| C3ORF48   | -0.021890514 | 6.054411592 | 0.358918102 |
| LOC652466 | 0.025884784  | 6.092786335 | 0.358940567 |
| LOC650815 | 0.043921882  | 6.049895623 | 0.358997802 |
| GPR123    | 0.02261711   | 5.971427594 | 0.359078145 |
| SNED1     | -0.014839124 | 6.042494611 | 0.359098838 |
| OR1L8     | 0.027087853  | 6.181528038 | 0.359188012 |
| FLJ40448  | -0.034504405 | 6.425805868 | 0.359246876 |
| CYP19A1   | -0.017715088 | 6.074634261 | 0.359252473 |
| BCL2L15   | -0.016063966 | 5.996661053 | 0.359292945 |
| UBE2C     | -0.023944021 | 6.156845198 | 0.359298296 |
| C10ORF28  | 0.040882312  | 6.774757902 | 0.359306009 |
| LOC649765 | 0.025571095  | 6.178181394 | 0.359329946 |
| LOC650455 | 0.025873823  | 6.009092931 | 0.359334889 |
| ZBED3     | 0.029406756  | 6.126739057 | 0.359618452 |
| PLA2G2F   | -0.021920517 | 6.050567228 | 0.359678934 |
| NUMA1     | 0.058403203  | 7.343936143 | 0.359715899 |
| LOC401525 | -0.026584085 | 6.136064515 | 0.359742173 |
| BXDC2     | 0.041225028  | 8.314913492 | 0.359820464 |
| IRGM      | 0.019939916  | 6.175104328 | 0.359855291 |
| WNT10B    | -0.030642608 | 6.014944517 | 0.359892345 |
| LOC652396 | -0.019590617 | 6.068070335 | 0.359925564 |
| ERG       | -0.014860815 | 6.184210733 | 0.359927237 |
| CD226     | -0.024114783 | 5.932385905 | 0.35993076  |
| KCNC3     | -0.021520225 | 5.976321988 | 0.359961863 |
| LOC647630 | -0.024849647 | 6.209036592 | 0.360093443 |
| C1ORF91   | -0.026047175 | 6.235391536 | 0.3601285   |
| CNGA2     | -0.024652408 | 6.091417999 | 0.360174145 |
| LOC652341 | -0.020889087 | 5.904120438 | 0.360224906 |
| PSEN2     | -0.031798783 | 7.92873654  | 0.360226753 |
| LOC643734 | 0.02607466   | 5.951329251 | 0.360398606 |
| LOC648803 | 0.018477194  | 6.104923724 | 0.360593021 |
| CYP4F3    | 0.015635977  | 6.01631638  | 0.360629647 |
| C5ORF34   | 0.015732012  | 6.166532024 | 0.360738965 |
| CNTLN     | 0.025400595  | 6.550870378 | 0.360886767 |
| CCDC148   | -0.023930493 | 5.965008145 | 0.360943947 |
| LOC646580 | -0.022788079 | 6.014072617 | 0.360955319 |
| MPG       | -0.014325832 | 6.118197305 | 0.361052445 |
| TFF1      | -0.024713184 | 6.001470876 | 0.361055069 |
| BFSP2     | -0.028408887 | 6.099858016 | 0.361202623 |
| FLJ16124  | -0.023366939 | 5.935594665 | 0.361221529 |
| RIN1      | -0.030837299 | 6.534909919 | 0.361330939 |
| MAGEB6B   | 0.02574945   | 6.068953839 | 0.361404315 |
| LGALS4    | 0.023557189  | 6.177348785 | 0.361445515 |

## DEG.infomation

|           |              |             |             |
|-----------|--------------|-------------|-------------|
| DOC2A     | 0.018335619  | 6.013167116 | 0.361507924 |
| WDR23     | -0.037741392 | 7.350824854 | 0.361518679 |
| HCCA2     | -0.03267372  | 7.648853726 | 0.361531881 |
| LOC645529 | 0.022699625  | 6.052180734 | 0.361673441 |
| ZP4       | -0.022912617 | 5.912389963 | 0.361729676 |
| LOC646443 | -0.02128848  | 6.105319816 | 0.361788141 |
| LOC653653 | -0.019529811 | 6.025150727 | 0.361803219 |
| ADAM12    | -0.01734374  | 6.017291953 | 0.361848589 |
| FAM87B    | -0.022094426 | 6.099530274 | 0.361862023 |
| TTTY6     | 0.018837887  | 6.110746473 | 0.361904945 |
| ADCK4     | -0.057374366 | 6.562598785 | 0.362039365 |
| SFTPB     | 0.017431044  | 6.142752991 | 0.362103526 |
| MYOC      | 0.062548764  | 6.610743814 | 0.362193487 |
| HNRPUL2   | 0.037506608  | 8.556645036 | 0.362297198 |
| PSD       | 0.023264523  | 6.081417441 | 0.36231133  |
| LOC643988 | 0.025436188  | 6.147906537 | 0.362500332 |
| RBM35A    | 0.025402026  | 6.024610611 | 0.362535781 |
| WNT3      | -0.025234686 | 6.470577565 | 0.362539751 |
| GPR87     | 0.021167363  | 6.110716863 | 0.362549206 |
| GSTA5     | -0.023613817 | 5.888691524 | 0.362565955 |
| RGS20     | 0.016454281  | 5.993798762 | 0.362593835 |
| LGR4      | 0.037064587  | 6.475993805 | 0.362706774 |
| DDX19A    | 0.021012489  | 8.386880822 | 0.362727397 |
| RASL10B   | 0.030124447  | 6.436983881 | 0.362905353 |
| CTAGE1    | 0.018496084  | 5.986864898 | 0.363049451 |
| LST-3TM12 | 0.023048833  | 6.008336888 | 0.363089886 |
| GABRA6    | 0.025691478  | 5.993808512 | 0.363105875 |
| LOC651876 | 0.02057016   | 6.308437917 | 0.363140371 |
| ETFDH     | 0.07284615   | 10.87924747 | 0.363448116 |
| LOC650942 | -0.022063082 | 6.006267237 | 0.363451749 |
| LOC645039 | -0.019843172 | 6.112219233 | 0.363526202 |
| C10ORF113 | -0.023133798 | 5.900986445 | 0.36374803  |
| GPR182    | -0.029974815 | 6.166584647 | 0.363759442 |
| C10ORF90  | 0.025488803  | 5.973647076 | 0.363802596 |
| LOC728160 | 0.015015965  | 6.009860357 | 0.36381896  |
| SEMA3A    | -0.031337751 | 6.329532176 | 0.363922403 |
| FOXA3     | -0.025869715 | 6.023287289 | 0.363973198 |
| CCDC68    | -0.019910263 | 6.478843869 | 0.364111089 |
| ERCC4     | 0.019043843  | 6.244313027 | 0.364136154 |
| OR8G5     | 0.02154162   | 5.99766913  | 0.364499558 |
| LOC652202 | -0.022949219 | 6.017527535 | 0.364688168 |
| LDLRAD1   | 0.024033968  | 6.122413298 | 0.364712945 |
| LOC648792 | 0.023777216  | 5.888339207 | 0.364776158 |
| PKHD1     | 0.017232846  | 6.248689947 | 0.364811311 |
| LOC143941 | -0.021650275 | 6.108294348 | 0.364855766 |
| RPRML     | -0.06768504  | 6.596107442 | 0.36487803  |
| NLGN3     | 0.023263965  | 6.002216382 | 0.36492919  |
| DCP1B     | -0.022903975 | 6.225291867 | 0.365007909 |
| GUCA1A    | 0.022876141  | 6.367419429 | 0.365045609 |
| LOC648752 | -0.026459435 | 6.073024232 | 0.365095518 |
| DHX58     | -0.035518176 | 6.542077999 | 0.365188466 |

## DEG.infomation

|           |              |             |             |
|-----------|--------------|-------------|-------------|
| TAS2R48   | 0.02368306   | 6.045134162 | 0.365206168 |
| CFHR4     | 0.023440258  | 5.947517491 | 0.365222469 |
| MOGAT3    | 0.021760842  | 5.958649928 | 0.36539871  |
| SLC37A1   | -0.029468341 | 6.610186461 | 0.365428312 |
| ZDHHC3    | 0.039866988  | 7.622741618 | 0.365493961 |
| CSN2      | 0.023491794  | 6.052065732 | 0.365528326 |
| LOC650020 | -0.026322053 | 6.267534642 | 0.365930682 |
| LOC642594 | 0.021408485  | 6.059278892 | 0.36602743  |
| FSTL4     | 0.016564589  | 6.114969733 | 0.366129016 |
| NTN2L     | -0.023212546 | 5.944337327 | 0.366166355 |
| ZNF683    | 0.025768073  | 6.311252149 | 0.366176426 |
| LCE1D     | 0.023694283  | 6.133523774 | 0.366199899 |
| KIAA1627  | -0.055671248 | 7.499571528 | 0.36621869  |
| CCDC123   | 0.02945065   | 6.470319667 | 0.366240911 |
| LOC644277 | 0.026237197  | 6.145196579 | 0.3662832   |
| FGL1      | -0.01206898  | 6.182505393 | 0.366336483 |
| BPIL2     | -0.026224598 | 5.992244693 | 0.366412627 |
| XAGE1D    | -0.026537173 | 6.054789658 | 0.366503529 |
| DCN       | -0.062466517 | 12.12713102 | 0.366513449 |
| WNT8A     | 0.01639004   | 6.034643989 | 0.366524008 |
| MCC       | -0.029541432 | 6.482746191 | 0.366549231 |
| TATDN1    | -0.049167853 | 8.041714884 | 0.366593195 |
| ZNF358    | -0.048582605 | 10.13444419 | 0.366647034 |
| LOC389142 | 0.021806658  | 6.159626335 | 0.366762428 |
| UNC5D     | -0.025065704 | 5.826308513 | 0.366810802 |
| LOC497256 | 0.019670493  | 6.070222561 | 0.366815855 |
| LOC143678 | -0.021233742 | 6.040941718 | 0.366827232 |
| OTC       | 0.032473965  | 6.023595534 | 0.366879858 |
| LOC441135 | 0.022274085  | 5.946847291 | 0.366880124 |
| FMO9P     | 0.019011217  | 6.002898201 | 0.366909171 |
| TTY19     | -0.01721021  | 6.127311141 | 0.366996167 |
| PKIB      | -0.017635518 | 6.100732288 | 0.367120327 |
| LOC390364 | 0.023496657  | 5.981531435 | 0.367262428 |
| LOC644278 | -0.020380601 | 6.077321971 | 0.367296769 |
| LOC651353 | 0.020946786  | 6.080407049 | 0.367431582 |
| TTY18     | 0.014843173  | 6.060816403 | 0.367461587 |
| CPN1      | -0.023530238 | 6.016230228 | 0.367586191 |
| LOC653093 | 0.022346561  | 6.166201843 | 0.36761633  |
| PRAMEF5   | 0.022790036  | 6.449608185 | 0.367784211 |
| MED4      | 0.048296718  | 8.557452828 | 0.36778972  |
| LOC389111 | -0.020495423 | 6.130770589 | 0.367806371 |
| LOC643083 | 0.027515742  | 5.926757638 | 0.367883921 |
| LOC338667 | -0.02436705  | 6.176977726 | 0.36798804  |
| LOC651390 | 0.021392932  | 6.026597305 | 0.368185081 |
| TPTE2     | 0.015419838  | 6.001624585 | 0.368208669 |
| FUT11     | 0.036747278  | 6.051096467 | 0.36828625  |
| HBM       | -0.024178842 | 6.105613135 | 0.368511404 |
| HMGCS2    | -0.22050721  | 7.65923639  | 0.368540923 |
| MLNR      | 0.024378321  | 5.99659542  | 0.368564997 |
| MTMR6     | 0.065183772  | 8.593541316 | 0.368615056 |
| LOC652670 | -0.023571677 | 5.896072059 | 0.368933086 |

## DEG.infomation

|           |              |             |             |
|-----------|--------------|-------------|-------------|
| LOC642082 | 0.043011548  | 7.791452493 | 0.368967793 |
| SFRS2B    | 0.030487572  | 8.48495284  | 0.36898818  |
| DSCR10    | -0.023392946 | 6.364002961 | 0.369131017 |
| LOC643841 | 0.025736839  | 6.131265562 | 0.369203687 |
| LOC647456 | 0.023071431  | 6.41324167  | 0.36926177  |
| SLC24A3   | 0.040054375  | 6.214980127 | 0.369271256 |
| LOC728643 | -0.110004911 | 8.33954242  | 0.369592594 |
| C12ORF32  | -0.035807394 | 6.651739564 | 0.369634066 |
| RELТ      | 0.022052342  | 5.941401258 | 0.369750376 |
| PCDHB1    | -0.022244027 | 5.90393365  | 0.369766902 |
| OR13C4    | -0.023102679 | 6.027991604 | 0.369855629 |
| LOC642574 | 0.028660218  | 6.099411919 | 0.369873115 |
| LOC649067 | 0.034094084  | 6.168937023 | 0.369901559 |
| MCM7      | 0.031992162  | 7.95128553  | 0.369920263 |
| CCDC105   | 0.022185604  | 6.025575276 | 0.369922494 |
| GPR103    | -0.023845984 | 6.117562981 | 0.369945272 |
| SLC38A11  | 0.040754025  | 6.519374655 | 0.370032031 |
| LOC648716 | -0.015838531 | 6.141001423 | 0.370073133 |
| LOC390372 | 0.02425954   | 6.414775845 | 0.370100757 |
| LOC643433 | 0.046754952  | 11.33151921 | 0.370121787 |
| ANKRD49   | 0.030401448  | 7.222073805 | 0.370344618 |
| LOC441114 | -0.023734449 | 6.082558169 | 0.37036633  |
| LOC644280 | 0.028737762  | 6.041760621 | 0.370522381 |
| TEX13B    | -0.023046042 | 6.121272852 | 0.370601677 |
| LOC440295 | -0.024295647 | 5.942774182 | 0.370620923 |
| CCDC54    | -0.023404411 | 6.001725861 | 0.370705239 |
| COLEC12   | 0.053414393  | 7.808644342 | 0.37074643  |
| LOC652651 | -0.022539193 | 6.077472762 | 0.370752746 |
| LOC649227 | 0.021300445  | 6.179036352 | 0.370945879 |
| BANK1     | 0.024165815  | 6.125492786 | 0.371065773 |
| FAM171B   | -0.037369977 | 6.134420697 | 0.371135782 |
| LOC645079 | 0.030210872  | 6.479111534 | 0.371294306 |
| EIF5A2    | 0.023430656  | 6.560692417 | 0.371350459 |
| LOC285500 | 0.021103649  | 6.020175831 | 0.371362105 |
| CENPI     | 0.015461733  | 6.071710294 | 0.371381469 |
| LOC641751 | -0.020437662 | 5.990477629 | 0.371559295 |
| DENND1C   | -0.020948192 | 6.08731604  | 0.371647802 |
| HOXA9     | -0.01611801  | 6.011164127 | 0.371672983 |
| LOC647579 | 0.022365355  | 6.113685801 | 0.371695018 |
| TMEM38B   | 0.049255356  | 8.147176931 | 0.371778662 |
| MUC17     | 0.02242471   | 6.0301607   | 0.37191984  |
| FLJ42986  | 0.017560921  | 6.064742251 | 0.372085456 |
| OR4F4     | -0.015241955 | 6.018216271 | 0.372095419 |
| LOC644326 | 0.020270923  | 6.054942863 | 0.372117066 |
| SPANXN5   | -0.021668885 | 5.930236166 | 0.372135056 |
| SYS1      | -0.035204338 | 7.469422212 | 0.372144615 |
| C1ORF92   | 0.023713407  | 6.174786709 | 0.372245947 |
| LOC644964 | 0.020491829  | 5.968033049 | 0.372261765 |
| CHRNA     | -0.023827087 | 6.068403736 | 0.372393551 |
| ATP4A     | -0.029532895 | 5.999130415 | 0.372418427 |
| C15ORF20  | 0.036121293  | 5.944389078 | 0.372505652 |

## DEG.infomation

|           |              |             |             |
|-----------|--------------|-------------|-------------|
| LOC651809 | 0.02172248   | 6.046600007 | 0.372600553 |
| ZNF253    | 0.023698817  | 5.994815163 | 0.372633284 |
| KCNJ6     | -0.022541183 | 6.090001553 | 0.37282258  |
| PWWP2B    | -0.033988981 | 7.158213322 | 0.372954297 |
| ZMYND15   | 0.036176314  | 6.416315288 | 0.372984256 |
| LOC147975 | 0.020195545  | 5.946539652 | 0.373015038 |
| POU1F1    | -0.019707038 | 5.849949733 | 0.373049282 |
| IFITM5    | -0.025059601 | 6.054875345 | 0.373092292 |
| TMEM35    | 0.026903618  | 6.147930903 | 0.373213463 |
| ZNF648    | -0.024801742 | 5.977611307 | 0.373252687 |
| RLTPR     | -0.020229233 | 6.004190338 | 0.373416549 |
| KIAA0329  | -0.025890561 | 6.1813495   | 0.373522799 |
| LOC652552 | -0.020838056 | 6.126112579 | 0.373751842 |
| CH25H     | -0.075433823 | 6.429294542 | 0.373976374 |
| DHRS8     | -0.021556759 | 6.237227796 | 0.373991796 |
| C6ORF136  | -0.049654862 | 9.506861944 | 0.374005996 |
| LOC647244 | -0.029047786 | 5.920236395 | 0.374167458 |
| GAB4      | 0.023066293  | 6.042827283 | 0.374206655 |
| CREBBP    | 0.028396459  | 7.868772555 | 0.374233506 |
| NFATC2    | -0.016641773 | 5.933669527 | 0.374254454 |
| KRT33B    | -0.024015564 | 6.064129728 | 0.374288829 |
| GP6       | 0.0193587    | 6.306898674 | 0.374400744 |
| TRMT2B    | -0.026301358 | 5.934463936 | 0.374422102 |
| LOC653584 | 0.020726196  | 5.998064196 | 0.374429196 |
| LOC641860 | 0.028573911  | 6.166487956 | 0.374442734 |
| LOC345051 | -0.019604009 | 6.063521822 | 0.37449676  |
| MICA      | -0.043104167 | 6.605977608 | 0.37451707  |
| SOAT2     | -0.022076724 | 6.070112408 | 0.37451891  |
| LOC642580 | -0.021273116 | 6.002818888 | 0.37489262  |
| LRP11     | 0.033246658  | 7.093596704 | 0.374927285 |
| LOC651553 | 0.02483078   | 6.043838582 | 0.374939207 |
| LOC643900 | -0.02178317  | 6.166544081 | 0.37496674  |
| LOC388160 | -0.018422963 | 6.080124891 | 0.375093045 |
| LOC643233 | 0.034658481  | 5.971859573 | 0.375124802 |
| LBX2      | -0.022086178 | 6.064420734 | 0.375209926 |
| C10ORF122 | -0.021210376 | 6.138436092 | 0.375259945 |
| LOC647191 | 0.026130911  | 6.152819131 | 0.375381524 |
| ACACA     | -0.03235841  | 7.698879526 | 0.375405968 |
| NXF4      | -0.017644262 | 6.061805646 | 0.375470884 |
| CDK5R1    | 0.026852248  | 6.347137802 | 0.375535643 |
| ZNF554    | -0.02145304  | 6.018290674 | 0.375540005 |
| INF2      | 0.03808286   | 7.226958239 | 0.375759303 |
| TANK      | 0.03606146   | 6.871808868 | 0.375874838 |
| FLJ25715  | 0.022262701  | 6.139287117 | 0.375964017 |
| ANKRD1    | 0.197415538  | 11.75414562 | 0.376199009 |
| ALPPL2    | -0.026271056 | 6.208711972 | 0.376247115 |
| LOC643721 | 0.022252883  | 5.93444604  | 0.376248073 |
| PLCD1     | 0.028038065  | 6.668563415 | 0.376254252 |
| UHRF2     | 0.033450355  | 6.823121647 | 0.376291905 |
| INA       | -0.022130004 | 6.028728491 | 0.376348744 |
| LOC644302 | -0.024227628 | 5.846503277 | 0.37637879  |

## DEG.infomation

|           |              |             |             |
|-----------|--------------|-------------|-------------|
| LOC650836 | 0.025855133  | 5.930679246 | 0.376400658 |
| LOC651012 | 0.018125348  | 6.028513773 | 0.376458345 |
| LOC644225 | -0.021842879 | 6.029239347 | 0.376535693 |
| IL28A     | -0.02648975  | 6.062204928 | 0.376576474 |
| LOC652294 | 0.024739879  | 6.116748804 | 0.376788173 |
| LOC641714 | -0.024744014 | 5.91525615  | 0.376808096 |
| OBSCN     | 0.075262261  | 9.04910781  | 0.376831922 |
| UBE2E2    | 0.039161021  | 9.864580236 | 0.376979691 |
| LOC651965 | -0.020321131 | 5.992389347 | 0.37700513  |
| SSX6      | 0.016095619  | 6.007047676 | 0.377014981 |
| LOC652134 | 0.025420596  | 6.362677995 | 0.377022194 |
| LOC653240 | -0.016575624 | 6.123003928 | 0.377092467 |
| LOC649548 | -0.044543237 | 12.7153119  | 0.377276743 |
| MPP1      | -0.049347554 | 7.659259879 | 0.377305177 |
| LOC653817 | 0.024134038  | 5.935063093 | 0.37742094  |
| TMEM137   | -0.058791564 | 6.766131181 | 0.377562604 |
| MYO6      | 0.025810348  | 6.441509933 | 0.37759382  |
| FAM90A20  | 0.024449612  | 5.949504844 | 0.377614124 |
| LOC645634 | 0.02317334   | 6.08615571  | 0.377644452 |
| ZNF33B    | -0.045719969 | 7.534241542 | 0.377670149 |
| LOC643533 | -0.020133964 | 6.040175662 | 0.377774749 |
| LOC642425 | -0.024336874 | 5.961482888 | 0.377790413 |
| CPA2      | 0.020009501  | 6.010466388 | 0.377824143 |
| FLJ41046  | 0.023740565  | 6.192470853 | 0.378024668 |
| MXD3      | -0.027171705 | 6.386667829 | 0.378203728 |
| LOC442329 | -0.023690043 | 6.248072787 | 0.378251889 |
| LOC647648 | -0.027088181 | 5.894171376 | 0.378309446 |
| NHLRC1    | 0.022077169  | 5.985779465 | 0.378513364 |
| SLC45A3   | -0.033836348 | 6.614444055 | 0.378708712 |
| LOC643594 | -0.023235573 | 6.046748667 | 0.378735269 |
| LOC642626 | -0.021049843 | 6.037126762 | 0.378735819 |
| LOC731052 | -0.021994312 | 6.006251444 | 0.378742452 |
| LOC644923 | -0.027255661 | 6.035250035 | 0.378749017 |
| TM4SF19   | -0.012178652 | 6.016238197 | 0.378865491 |
| TEX28     | 0.02534828   | 6.296150471 | 0.379166099 |
| ITPR2     | -0.025353879 | 6.600653295 | 0.379206758 |
| LOC644351 | -0.021981177 | 6.143454017 | 0.379261311 |
| RALYL     | 0.063045411  | 6.485587632 | 0.379300004 |
| PHYHIPL   | 0.02812633   | 6.066694278 | 0.379406095 |
| ADCY8     | 0.025954513  | 6.037906513 | 0.379415874 |
| LOC644126 | -0.020850185 | 6.038002428 | 0.379627925 |
| LOC652476 | -0.020956581 | 5.93401307  | 0.379868549 |
| HTR2A     | -0.044724513 | 10.68946266 | 0.379941562 |
| INSM2     | -0.020982324 | 6.032312061 | 0.379968845 |
| LOC648569 | 0.019834679  | 6.186080462 | 0.380034448 |
| CSRP3     | 0.097889452  | 11.70563518 | 0.380123273 |
| TRMT12    | -0.035119627 | 7.811127296 | 0.380214704 |
| FGD5      | 0.042877787  | 8.065181357 | 0.380295544 |
| LOC644981 | -0.023847207 | 5.997359248 | 0.380305154 |
| VNN3      | -0.013728261 | 6.023802333 | 0.380494062 |
| LOC643624 | -0.02089052  | 6.344189408 | 0.380508605 |



## DEG.infomation

|               |              |             |             |
|---------------|--------------|-------------|-------------|
| LOC645627     | 0.025005743  | 6.122594728 | 0.380587715 |
| PTDSS2        | -0.056204368 | 7.510524967 | 0.38067808  |
| LOC339047     | 0.010644891  | 6.079960278 | 0.3807869   |
| LOC642160     | 0.022431048  | 6.030111854 | 0.380809304 |
| LOC642103     | -0.028698489 | 5.948772561 | 0.380858649 |
| LOC729370     | -0.025919571 | 6.171365828 | 0.380861106 |
| CTSE          | -0.017531005 | 6.29210767  | 0.380884678 |
| RBM           | -0.024436724 | 5.963096287 | 0.380924453 |
| KIAA0953      | -0.021352383 | 6.148148683 | 0.381055945 |
| LOC642049     | -0.021139835 | 6.030959394 | 0.381121713 |
| CLSTN3        | -0.023057999 | 6.092412969 | 0.381364836 |
| MAGI3         | -0.021296563 | 6.394972047 | 0.381437281 |
| TEP1          | -0.022175465 | 6.02440201  | 0.381442748 |
| C14ORF82      | -0.042938411 | 6.881570099 | 0.381580551 |
| DISP2         | -0.025054868 | 6.227172194 | 0.381689    |
| DONSON        | 0.022362915  | 6.679855937 | 0.381717552 |
| SCG3          | -0.015557024 | 6.076064178 | 0.381808771 |
| LOC644785     | 0.025318596  | 6.011567829 | 0.381810789 |
| LOC731049     | -0.047565024 | 8.955769304 | 0.381975389 |
| OR51A7        | -0.021837572 | 6.099921995 | 0.38202966  |
| LOC643492     | 0.021463587  | 6.199940624 | 0.382210498 |
| LOC642268     | -0.018112793 | 5.994397383 | 0.382231723 |
| TMEM65        | 0.032327111  | 6.319759132 | 0.38244568  |
| STYK1         | -0.016344085 | 6.000293834 | 0.382457863 |
| NPTN          | 0.055127447  | 10.43007068 | 0.382459346 |
| TM4SF20       | 0.021080575  | 5.95020981  | 0.382526049 |
| MGC40574      | -0.020810644 | 5.930103615 | 0.382766887 |
| LOC645891     | -0.027824109 | 6.002022932 | 0.382795791 |
| PTGR2         | 0.041333554  | 7.680953606 | 0.382851559 |
| LOC646698     | -0.023357017 | 5.999102612 | 0.383041749 |
| LOC644359     | -0.019699262 | 6.096570875 | 0.383049521 |
| LOC730274     | -0.023769692 | 6.050125288 | 0.383094553 |
| AADAQL4       | -0.031007927 | 6.00924245  | 0.383174709 |
| C11ORF76      | -0.014754674 | 5.926021108 | 0.383239229 |
| CDC26         | 0.056095363  | 10.48222374 | 0.383375302 |
| LOC652491     | -0.027432214 | 6.057595724 | 0.383426889 |
| TMEM85        | -0.033124583 | 10.33383177 | 0.383467623 |
| FHL5          | -0.044530126 | 6.599657114 | 0.383472662 |
| LOC648050     | 0.025868646  | 5.942562511 | 0.383576956 |
| MEPE          | 0.024693919  | 6.108157577 | 0.383619865 |
| RDH12         | -0.025554088 | 6.044703824 | 0.383692654 |
| DKFZP686E2158 | 0.024407649  | 6.346315905 | 0.383694022 |
| POLS          | 0.032273031  | 8.156340917 | 0.383697804 |
| PCNXL3        | -0.031992708 | 7.115292729 | 0.383730102 |
| VAC14         | -0.01665632  | 6.3142127   | 0.383790715 |
| RRAGC         | 0.036002938  | 8.339258555 | 0.383848919 |
| LOC728066     | 0.021335208  | 6.021402926 | 0.383898569 |
| FABP1         | 0.019522666  | 5.945217362 | 0.383969025 |
| PRSS23        | 0.067476791  | 7.525325402 | 0.383973893 |
| LOC651196     | 0.022724875  | 6.110762988 | 0.384025109 |
| LOC643236     | -0.02042749  | 6.095377229 | 0.384049159 |

## DEG.infomation

|           |              |             |             |
|-----------|--------------|-------------|-------------|
| GYPB      | 0.021896299  | 5.894395515 | 0.384177994 |
| LRDD      | 0.021025661  | 6.651527322 | 0.384181584 |
| PNCK      | -0.057878362 | 7.901043368 | 0.384441583 |
| MARCH6    | 0.076961983  | 9.229619879 | 0.384471978 |
| SIM1      | 0.014703706  | 6.058569601 | 0.384489396 |
| KIF16B    | 0.027138388  | 7.113620207 | 0.38460488  |
| LOC642198 | 0.02596532   | 6.003787386 | 0.384609576 |
| REG1P     | 0.027413649  | 5.954973545 | 0.384727306 |
| ITCH      | -0.032877595 | 7.975181116 | 0.384779976 |
| LOC643120 | 0.025266051  | 5.918515272 | 0.384795993 |
| LOC643313 | 0.017803108  | 6.205556057 | 0.384821554 |
| TBC1D3E   | 0.024375053  | 6.012380715 | 0.384848589 |
| LOC646501 | 0.020600793  | 6.000732918 | 0.384908761 |
| RPS20     | -0.036947875 | 13.01558512 | 0.385125014 |
| LOC642772 | -0.021439755 | 6.118401067 | 0.385187278 |
| LOC650788 | 0.036062757  | 5.972859744 | 0.385217918 |
| TTC39A    | -0.022760166 | 5.964446234 | 0.385245475 |
| CYP2C19   | -0.022946488 | 6.093197893 | 0.385296361 |
| HOXD11    | 0.028702996  | 6.092834935 | 0.385345396 |
| TIGD5     | -0.046436273 | 8.233299885 | 0.385462142 |
| SFTPA2    | -0.020542148 | 6.102084749 | 0.385476809 |
| DCLRE1B   | -0.024362037 | 6.05312176  | 0.385514278 |
| PRKACA    | -0.02914783  | 6.485742382 | 0.385605935 |
| LOC642295 | 0.017320442  | 6.328463146 | 0.385626634 |
| LOC390547 | -0.023488991 | 6.142071354 | 0.385630043 |
| LOC648174 | 0.023587631  | 6.16706941  | 0.385757419 |
| LOC647295 | 0.023522673  | 6.197045582 | 0.385767312 |
| LOC439985 | -0.021531441 | 6.052395739 | 0.385864279 |
| TOPBP1    | 0.047464429  | 7.868804107 | 0.385932844 |
| CHST8     | 0.019685713  | 6.046450241 | 0.385953948 |
| FLJ35785  | 0.012646955  | 6.099078126 | 0.385996356 |
| CREB3L1   | -0.022653686 | 6.220947619 | 0.386034172 |
| OR5AY1    | -0.022006713 | 6.010719111 | 0.386058404 |
| LOC652043 | -0.020098886 | 6.045773203 | 0.386148701 |
| FLJ38773  | 0.020657271  | 6.031554865 | 0.386168335 |
| PYGO1     | -0.022589447 | 6.038867197 | 0.386248549 |
| LOC644056 | -0.020897826 | 6.148751242 | 0.386342857 |
| LOC644843 | -0.021864646 | 5.944553792 | 0.386376243 |
| SCN2A     | -0.012851792 | 6.03101774  | 0.386438947 |
| DGKH      | 0.024461236  | 6.117988362 | 0.38656481  |
| GPATCH8   | 0.02873854   | 6.224665873 | 0.386569385 |
| TSGA10    | 0.013617122  | 6.014280684 | 0.386587306 |
| HAPLN3    | -0.037502551 | 6.28384926  | 0.386611631 |
| LOC149643 | -0.024317254 | 6.038963099 | 0.38668499  |
| RNASE12   | -0.023220196 | 5.972701534 | 0.38670669  |
| OR5H1     | 0.023683487  | 6.058015761 | 0.386738678 |
| SLC15A1   | -0.021636117 | 6.016796976 | 0.386858935 |
| C1ORF131  | 0.033610564  | 8.130777285 | 0.386867543 |
| LOC441792 | -0.021906152 | 5.880828556 | 0.386940828 |
| LOC441907 | 0.022099518  | 6.100690818 | 0.387015469 |
| LOC653968 | 0.019652726  | 6.009736389 | 0.38713763  |

## DEG.infomation

|               |              |             |             |
|---------------|--------------|-------------|-------------|
| LOC649770     | -0.02143172  | 5.947482547 | 0.387162037 |
| LATS2         | 0.038027348  | 6.984183387 | 0.387163532 |
| MKI67         | 0.023770206  | 6.095923995 | 0.387192371 |
| LOC644408     | 0.021883103  | 5.93018002  | 0.387413956 |
| LOC400927     | 0.024079815  | 6.070589701 | 0.387488958 |
| TBX5          | -0.021917626 | 6.234471299 | 0.387529779 |
| TAS2R3        | 0.023212782  | 6.101540063 | 0.38758642  |
| FAM130A1      | -0.027337674 | 7.3008138   | 0.387631782 |
| KIAA1984      | -0.025871856 | 6.373407016 | 0.387633937 |
| TAF4B         | -0.024822724 | 6.188624054 | 0.387952932 |
| LOC643630     | -0.020697898 | 6.088543856 | 0.387964139 |
| HIGD2BP       | 0.014169895  | 5.920703074 | 0.388205288 |
| PBK           | 0.0249573    | 6.038493692 | 0.38821284  |
| DEFB125       | 0.026914786  | 6.311916454 | 0.388348067 |
| LOC653252     | -0.020416716 | 6.05243748  | 0.38836566  |
| LOC728499     | -0.053365902 | 7.663175099 | 0.388386706 |
| LOC390570     | -0.02243172  | 5.983844299 | 0.388548814 |
| LOC642980     | 0.018633882  | 6.208264703 | 0.388566469 |
| TMC5          | 0.037405572  | 6.023986217 | 0.388570323 |
| TMEM123       | 0.043298879  | 9.402105502 | 0.388651512 |
| EVC2          | 0.025027609  | 6.362605939 | 0.388740631 |
| LOC648069     | 0.025225633  | 6.204000049 | 0.388824015 |
| GJD4          | 0.020095392  | 6.054460185 | 0.388827567 |
| FA2H          | 0.020523866  | 5.983262443 | 0.388930916 |
| LOC730995     | 0.042097376  | 6.391560293 | 0.389026882 |
| TMEM105       | 0.023742662  | 6.129601462 | 0.389203621 |
| PHLDB3        | -0.031527073 | 6.047213911 | 0.389225834 |
| C18ORF16      | 0.020338215  | 6.051734166 | 0.38934191  |
| LOC123876     | -0.022639003 | 5.928743341 | 0.389401687 |
| LOC253573     | 0.026078069  | 6.117133303 | 0.389495001 |
| KU-MEL-3      | -0.022767946 | 5.972805747 | 0.389496371 |
| LRRFIP1       | -0.065611801 | 10.19268284 | 0.389505714 |
| ALOXE3        | -0.021234644 | 6.153091049 | 0.389623638 |
| DKFZP686O1327 | 0.018063808  | 6.03241012  | 0.389626606 |
| GTF2F1        | 0.034326855  | 7.923988123 | 0.38971818  |
| CLDN8         | 0.018936263  | 6.010852625 | 0.389720488 |
| LOC651476     | -0.029653062 | 5.849575201 | 0.389832387 |
| LOC649396     | 0.0259688    | 6.104567304 | 0.389850658 |
| CA4           | 0.108331209  | 9.901964439 | 0.389864271 |
| FLJ30375      | -0.022276428 | 6.01262129  | 0.389957304 |
| LOC649025     | -0.019137673 | 6.172106323 | 0.389973238 |
| LOC401010     | 0.020410843  | 6.449197135 | 0.389982672 |
| GSTA1         | -0.019168847 | 5.976163905 | 0.389986356 |
| LOC643391     | -0.025870356 | 6.015653298 | 0.39030027  |
| LOC649749     | -0.020680807 | 6.060375573 | 0.390323607 |
| ANKK1         | -0.01952291  | 5.922663943 | 0.390349986 |
| RPS4X         | 0.051196385  | 11.02425986 | 0.39037034  |
| NOS1          | 0.019857391  | 6.008857135 | 0.39038178  |
| GPR88         | -0.022444301 | 5.991024409 | 0.390462769 |
| LOC652231     | 0.024158023  | 6.091695634 | 0.3905345   |
| LOC650146     | 0.02381397   | 6.052661275 | 0.390576521 |

## DEG.infomation

|               |              |             |             |
|---------------|--------------|-------------|-------------|
| ABCC12        | -0.026763352 | 6.530237456 | 0.390722538 |
| OR9A4         | -0.025887059 | 6.026222462 | 0.390750276 |
| CDX4          | 0.027658693  | 5.955006937 | 0.390796846 |
| PIGL          | -0.022571457 | 6.265342041 | 0.390843906 |
| BAGE          | 0.024754741  | 6.424262545 | 0.390850403 |
| LOC646496     | -0.019807794 | 5.998015717 | 0.390866881 |
| SGOL2         | -0.016676622 | 6.103412313 | 0.39088877  |
| KIAA1166      | -0.026330505 | 6.385093992 | 0.391047633 |
| GBL           | 0.027985042  | 7.511015204 | 0.391054367 |
| EMR1          | 0.022083269  | 5.989138425 | 0.391057618 |
| KRTAP15-1     | 0.024742877  | 5.951232376 | 0.391142908 |
| ZNF709        | -0.021740945 | 6.041391072 | 0.391155102 |
| LOC645201     | -0.023802031 | 5.949506916 | 0.391202581 |
| VPREB1        | -0.018307856 | 6.070234114 | 0.391230974 |
| C1ORF65       | 0.021823851  | 5.939186705 | 0.391353442 |
| SNRPB2        | 0.026689292  | 9.771315602 | 0.391435903 |
| LOC650850     | 0.023042491  | 6.116584692 | 0.391464732 |
| SLC29A4       | -0.034484902 | 6.509175574 | 0.391599586 |
| LOC644422     | 0.044731578  | 6.972527583 | 0.391613356 |
| C17ORF82      | -0.024586302 | 6.164632218 | 0.391659168 |
| LOC731000     | 0.013814496  | 6.087349167 | 0.391677022 |
| DPF1          | -0.023236416 | 6.196201093 | 0.391741745 |
| OR5AS1        | 0.019208088  | 6.111325701 | 0.391952039 |
| NCOA4         | 0.045208739  | 12.70009862 | 0.391999164 |
| LOC650239     | -0.013393061 | 5.947870395 | 0.392036195 |
| C1GALT1C1     | 0.031792476  | 7.071505311 | 0.392048051 |
| DLX6          | 0.02127758   | 6.003539256 | 0.392105166 |
| IPO7          | -0.057005671 | 6.906676428 | 0.39213639  |
| GABRA5        | -0.014628923 | 5.973617831 | 0.392213889 |
| LRRC7         | -0.021671709 | 5.926868104 | 0.392264742 |
| DKFZP43411020 | -0.017149647 | 6.097939588 | 0.392275573 |
| MAP3K4        | -0.035477257 | 7.845674228 | 0.392323521 |
| CCDC120       | 0.026601119  | 6.69517104  | 0.39242412  |
| LOC651936     | 0.021732937  | 6.328060384 | 0.392424273 |
| ZSCAN20       | 0.023785697  | 6.141188744 | 0.392470751 |
| DENND4C       | -0.032642958 | 8.16937798  | 0.39248907  |
| OR5B12        | 0.019353432  | 6.052062274 | 0.392584635 |
| LOC119358     | 0.021483505  | 6.141907451 | 0.392621945 |
| MDS1          | -0.030530816 | 6.058827916 | 0.392645224 |
| LOC388965     | -0.021580522 | 6.062457962 | 0.392711249 |
| LOC642439     | 0.019450531  | 6.123438733 | 0.392732628 |
| FIGF          | 0.052171923  | 6.394936317 | 0.392870384 |
| STC2          | -0.071602623 | 7.33597569  | 0.39296193  |
| LOC646226     | -0.026182274 | 5.938090036 | 0.39297879  |
| SLC30A8       | -0.020805875 | 6.080465313 | 0.392982527 |
| CCDC33        | -0.025391215 | 6.257753185 | 0.39299748  |
| ZNF705A       | 0.019360231  | 5.982251774 | 0.393070119 |
| TMTC3         | 0.030769901  | 6.501316024 | 0.393114359 |
| LOC647971     | -0.020361598 | 6.348313065 | 0.393155141 |
| LOC387761     | -0.022734756 | 5.96294864  | 0.393333848 |
| DNAJB13       | 0.030210709  | 6.136631266 | 0.39336908  |

## DEG.infomation

|           |              |             |             |
|-----------|--------------|-------------|-------------|
| CRISP3    | 0.020767788  | 6.053066066 | 0.393434273 |
| LOC728127 | 0.024075602  | 6.717409906 | 0.393489068 |
| POU3F2    | -0.015909134 | 6.049884577 | 0.393494688 |
| C9ORF71   | 0.020311848  | 6.012827726 | 0.393496463 |
| SHQ1      | -0.035680499 | 6.933893309 | 0.393529201 |
| GPR15     | -0.021995533 | 6.012174094 | 0.393669946 |
| CYP26C1   | -0.025275336 | 6.03749971  | 0.393720682 |
| GRTP1     | -0.020475848 | 6.107848304 | 0.393734258 |
| LOC650268 | -0.02272696  | 6.129872002 | 0.39382399  |
| ZNF382    | -0.022585471 | 5.967433497 | 0.393845602 |
| SMYD3     | -0.032793485 | 7.556223849 | 0.39387143  |
| FLJ33360  | -0.023346375 | 5.988010969 | 0.39387644  |
| LOC650238 | 0.021606467  | 5.927149377 | 0.39391096  |
| INHBC     | 0.01927341   | 5.971624501 | 0.393916908 |
| MAGI2     | 0.03096328   | 5.986298609 | 0.394186496 |
| HMG4L     | -0.02448789  | 6.074374211 | 0.394198952 |
| PDZK1     | 0.013037747  | 6.00448857  | 0.394295003 |
| LOC653680 | -0.026765022 | 5.980509906 | 0.394313616 |
| LOC647131 | 0.021915722  | 6.076763098 | 0.394322991 |
| LOC650651 | -0.021495044 | 6.081886681 | 0.394344256 |
| LOC646037 | 0.0185457    | 6.093741313 | 0.39436148  |
| ZNF563    | -0.033922637 | 6.396626753 | 0.394564068 |
| FLJ45537  | 0.017830043  | 6.021074666 | 0.394609075 |
| LOC390856 | 0.018220059  | 6.073936951 | 0.394675028 |
| HIC1      | -0.024996742 | 6.491919283 | 0.394705052 |
| LOC644571 | -0.023283894 | 6.129984625 | 0.394779633 |
| PHF7      | 0.012338132  | 6.143384965 | 0.394861009 |
| HOXC10    | -0.022711569 | 6.149899329 | 0.394881649 |
| USP26     | -0.030682625 | 6.592422219 | 0.395058828 |
| EDAR      | -0.019756301 | 5.988544342 | 0.395084361 |
| LOC441869 | -0.020234681 | 5.93779381  | 0.395092384 |
| LOC652806 | 0.021019574  | 6.232426341 | 0.395152465 |
| LOC731035 | 0.030002387  | 6.063304447 | 0.395170829 |
| NOB1      | -0.031517214 | 6.633235278 | 0.395224103 |
| VEZF1     | -0.036172014 | 10.77072434 | 0.395247688 |
| UPK1A     | 0.02399297   | 6.207200257 | 0.395257424 |
| TMEM16D   | 0.019763452  | 5.991740896 | 0.395333481 |
| LOC728089 | 0.022199107  | 6.201127178 | 0.395333651 |
| TRNT1     | -0.02684829  | 6.733094048 | 0.395428093 |
| LOC647591 | 0.022720879  | 6.052328088 | 0.395450026 |
| PROKR1    | 0.023597474  | 5.975157314 | 0.395466288 |
| LOC730804 | -0.017479871 | 5.912110561 | 0.395665674 |
| TNNT2     | 0.037905394  | 13.54784282 | 0.395745273 |
| LOC649189 | -0.019440292 | 6.405540222 | 0.395757056 |
| DSG3      | -0.019541105 | 5.996390549 | 0.395762608 |
| MAGEB10   | 0.025206117  | 5.904654434 | 0.395805445 |
| LOC728269 | 0.016203104  | 6.045453155 | 0.395848225 |
| FLJ35934  | 0.023875733  | 6.184594803 | 0.395854284 |
| OR2T8     | 0.029229814  | 5.952172426 | 0.396055188 |
| LOC647832 | 0.013743447  | 6.037845223 | 0.396145624 |
| CDYL2     | -0.021307253 | 6.274822915 | 0.396180792 |

## DEG.infomation

|           |              |             |             |
|-----------|--------------|-------------|-------------|
| C1ORF94   | -0.020840932 | 6.180642173 | 0.396228801 |
| TAC1      | 0.013638676  | 6.005516826 | 0.396258752 |
| UXS1      | 0.042233514  | 6.13174148  | 0.396284894 |
| LOC653894 | -0.01949619  | 5.969746526 | 0.396331392 |
| PDCD4     | -0.043005272 | 9.333593401 | 0.396372754 |
| IL33      | 0.047830932  | 7.340974083 | 0.396414916 |
| KRTHA5    | 0.019867708  | 6.012645114 | 0.396425171 |
| AKT3      | -0.012351568 | 6.126525313 | 0.396581209 |
| C4ORF11   | -0.027150713 | 6.00034135  | 0.396646872 |
| CD2       | -0.031087321 | 6.169115304 | 0.396844135 |
| PFDN2     | 0.039373905  | 6.113014443 | 0.396849875 |
| C20ORF141 | -0.021566261 | 6.147253583 | 0.396959076 |
| LOC652540 | -0.020668984 | 5.934116047 | 0.396977115 |
| GK5       | 0.031288088  | 6.852729383 | 0.397055103 |
| LOC647911 | 0.029961495  | 5.953633986 | 0.397067173 |
| TBX2      | -0.063736497 | 7.696906175 | 0.397135861 |
| C6ORF155  | -0.022039888 | 6.130568358 | 0.397212522 |
| HIST1H2AH | -0.021810545 | 5.969408439 | 0.397335757 |
| LOC646029 | -0.022509926 | 6.071393184 | 0.397355087 |
| CDY1      | -0.012884788 | 6.045913396 | 0.397471714 |
| KRT34     | -0.019961318 | 6.028821554 | 0.397635229 |
| LOC645029 | 0.021781609  | 6.091710715 | 0.397656862 |
| LOC651291 | 0.020493858  | 6.043081962 | 0.397666904 |
| NUDT10    | -0.016693938 | 5.938979541 | 0.397732085 |
| UPK1B     | 0.028842299  | 5.966551802 | 0.397867471 |
| PTMS      | -0.060169389 | 8.51818146  | 0.397918765 |
| ATR       | -0.01307984  | 6.015010543 | 0.397968977 |
| GSTM2     | 0.06923325   | 10.13437312 | 0.398028551 |
| LOC647011 | -0.02562883  | 6.121396578 | 0.39808837  |
| WFDC13    | -0.024505211 | 5.937633415 | 0.398117717 |
| CYP2B7P1  | -0.020144449 | 6.021774981 | 0.398182173 |
| APOL5     | 0.022421506  | 6.130218811 | 0.398228051 |
| LOC400163 | -0.027293184 | 5.909256202 | 0.398243003 |
| CINP      | -0.032624217 | 6.725849266 | 0.398279872 |
| FAM178B   | 0.020180955  | 6.197900132 | 0.398310291 |
| LOC653412 | -0.020073748 | 5.950941173 | 0.398332926 |
| USP8      | 0.047641331  | 7.702913951 | 0.398525006 |
| LOC643467 | -0.019703805 | 6.093192077 | 0.398603892 |
| ACSS2     | -0.040954855 | 9.970631869 | 0.398642206 |
| C17ORF45  | 0.048561647  | 11.44660153 | 0.398700729 |
| LOC643210 | -0.020419867 | 6.031702303 | 0.398712297 |
| ASXL2     | -0.037765475 | 8.736779973 | 0.398726088 |
| BMP15     | 0.021955785  | 6.109574886 | 0.398735396 |
| MGC25181  | 0.030242262  | 5.925980989 | 0.39874117  |
| OR2F2     | -0.020909951 | 6.074926569 | 0.398766014 |
| NUDT16L1  | 0.070970139  | 8.309029056 | 0.398869616 |
| LOC648490 | 0.023969375  | 6.412027337 | 0.398949787 |
| LOC390282 | -0.021510976 | 5.992480168 | 0.399035319 |
| C3ORF41   | -0.020675853 | 6.007525309 | 0.399084241 |
| PABPC1L2B | -0.019604343 | 6.075104176 | 0.399087051 |
| NUMB      | -0.026892384 | 8.810555093 | 0.399173199 |

## DEG.infomation

|           |              |             |             |
|-----------|--------------|-------------|-------------|
| C9ORF25   | 0.027154379  | 7.014893101 | 0.399223816 |
| TXNRD2    | 0.033363453  | 7.151205875 | 0.399260201 |
| CRLF2     | -0.01246093  | 6.088335702 | 0.399388209 |
| LOC653047 | 0.015142709  | 6.135094246 | 0.399393259 |
| KSR1      | -0.022679261 | 6.142385313 | 0.399535874 |
| DICER1    | -0.023501436 | 7.120353338 | 0.399656033 |
| COX7C     | 0.039266425  | 14.36993423 | 0.39966401  |
| LOC648289 | 0.021629198  | 5.976283637 | 0.399682816 |
| LOC92154  | 0.025062805  | 6.057519181 | 0.399705914 |
| LOC441868 | 0.02234019   | 6.160842389 | 0.399784483 |
| LOC643791 | -0.020809022 | 6.016523263 | 0.399795738 |
| ANAPC1    | 0.019802012  | 7.21912429  | 0.399841891 |
| LOC440905 | 0.01544608   | 6.209439365 | 0.39991503  |
| FLJ46347  | -0.022085562 | 5.994605048 | 0.399924096 |
| LOC400174 | 0.021973434  | 6.085840882 | 0.40006149  |
| EXDL1     | 0.02518704   | 5.979462695 | 0.400100111 |
| WDR33     | -0.028725181 | 7.74287247  | 0.400164073 |
| ESF1      | 0.024340968  | 5.981214201 | 0.400457698 |
| LOC645781 | 0.016721196  | 6.022626217 | 0.400556469 |
| FNTA      | 0.036366883  | 9.146673255 | 0.400695413 |
| LOC389118 | 0.032822869  | 6.059915314 | 0.400704036 |
| FATE1     | -0.026965356 | 6.075966228 | 0.400791961 |
| FLJ38723  | -0.022504291 | 6.06494125  | 0.400844247 |
| LOC440786 | 0.024305395  | 6.07230217  | 0.40084438  |
| LOC643424 | 0.022080809  | 6.103417244 | 0.40085416  |
| PRPF8     | -0.051218786 | 10.02505915 | 0.400858133 |
| CCDC99    | -0.027831952 | 6.827993367 | 0.401175142 |
| LOC652682 | -0.023173179 | 6.098775584 | 0.401184682 |
| LOC440131 | 0.020631147  | 6.122742044 | 0.401259228 |
| C10ORF46  | -0.02878078  | 6.208365278 | 0.401310094 |
| C6ORF59   | -0.024178581 | 6.164924899 | 0.401390681 |
| LOC643598 | 0.020472419  | 6.059556495 | 0.401424159 |
| LOC653039 | -0.018757529 | 6.076829852 | 0.401455982 |
| MRPS15    | 0.035377488  | 10.76402626 | 0.401470798 |
| HIPK4     | -0.020664158 | 6.038320741 | 0.401507781 |
| LUZP2     | -0.024083522 | 6.408407407 | 0.401521671 |
| CSPG4LYP2 | 0.02024193   | 5.973190377 | 0.401683859 |
| SLC35B3   | 0.032727186  | 7.544069139 | 0.401791536 |
| ATG3      | 0.038749505  | 8.404872707 | 0.401822878 |
| C12ORF54  | -0.024490963 | 6.001838569 | 0.401909836 |
| SYT14     | -0.018879059 | 6.06382881  | 0.401963665 |
| TXN2      | 0.047882885  | 6.364325047 | 0.402014585 |
| RC3H1     | 0.035144284  | 5.960422901 | 0.402030171 |
| LOC647651 | -0.019412924 | 6.376601398 | 0.402065406 |
| LOC646278 | -0.022225065 | 6.063800233 | 0.402068889 |
| ZCCHC24   | -0.049565795 | 9.530349982 | 0.40207977  |
| LOC645084 | -0.028371206 | 6.009959377 | 0.40210845  |
| LOC651062 | 0.018956292  | 6.002966691 | 0.402188655 |
| LOC652224 | -0.022737401 | 5.957773245 | 0.402238383 |
| CTGLF3    | 0.047154493  | 9.230191356 | 0.402301133 |
| DUSP5P    | -0.015780841 | 5.987369194 | 0.402357145 |

## DEG.infomation

|           |              |             |             |
|-----------|--------------|-------------|-------------|
| SPOCD1    | 0.028455669  | 6.279109561 | 0.402414178 |
| ELA3B     | -0.021196641 | 6.164886371 | 0.40243122  |
| LOC654128 | -0.019770569 | 6.157364571 | 0.402480239 |
| TCTN2     | -0.023428495 | 5.982455141 | 0.402518272 |
| IL4       | -0.014941005 | 5.997291173 | 0.402550146 |
| PHF13     | -0.041281735 | 7.956350655 | 0.402765555 |
| LOC653857 | 0.012994583  | 6.066265352 | 0.402880344 |
| LOC729777 | -0.022787112 | 6.006702676 | 0.402903331 |
| LOC646012 | 0.016383907  | 6.219364322 | 0.402944759 |
| LOC728763 | 0.018460507  | 6.002438872 | 0.403004209 |
| LOC646452 | -0.021247257 | 6.022081308 | 0.403044015 |
| SPG20     | 0.028148255  | 7.202747181 | 0.403044333 |
| DGCR14    | 0.025086342  | 6.673832837 | 0.403068781 |
| CCNT2     | -0.02068501  | 6.711195958 | 0.403135956 |
| RUFY1     | 0.018119613  | 6.839449066 | 0.40321442  |
| LOC731641 | 0.019158328  | 6.02706138  | 0.403245714 |
| ANKRD34A  | -0.023074542 | 6.486457131 | 0.403273089 |
| LOC652715 | 0.018795662  | 5.949576489 | 0.403304696 |
| SORCS1    | -0.042369947 | 6.440029879 | 0.403320119 |
| DEFB32    | -0.016466298 | 5.97444985  | 0.403374161 |
| LOC650556 | -0.020751879 | 6.062598831 | 0.403384841 |
| IER2      | -0.039170103 | 6.263837179 | 0.403496611 |
| LOC343927 | 0.023461843  | 5.924022523 | 0.403666312 |
| SULT1A3   | -0.023528026 | 6.939943029 | 0.403675757 |
| LOC645465 | -0.019726154 | 6.247562599 | 0.403794182 |
| FAM105B   | -0.036399563 | 7.692525088 | 0.40384715  |
| LOC648362 | -0.030588994 | 5.880661194 | 0.403958122 |
| LOC644800 | -0.022143056 | 6.034064216 | 0.404024933 |
| LOC646708 | -0.022061707 | 5.999939548 | 0.404050425 |
| BDKRB2    | -0.027803032 | 6.107861477 | 0.404140385 |
| C6ORF129  | -0.043159205 | 8.526197222 | 0.404199674 |
| LOC400682 | 0.012981198  | 6.063649003 | 0.404296477 |
| CTSL2     | -0.026468338 | 6.330417883 | 0.404300945 |
| KRTAP7-1  | 0.019197228  | 6.096806186 | 0.40439603  |
| NSUN7     | -0.015526413 | 6.124458812 | 0.404648321 |
| LOC642797 | 0.020458153  | 5.980545639 | 0.404686166 |
| SORD      | -0.021549444 | 6.284560486 | 0.40472218  |
| MSTO1     | -0.048033464 | 7.401551903 | 0.404801495 |
| MGC40069  | -0.023043679 | 6.116310068 | 0.404861167 |
| BBC3      | 0.026938036  | 6.06476696  | 0.404923168 |
| TNFRSF12A | -0.135386379 | 9.623620957 | 0.404947008 |
| CSTL1     | -0.024306078 | 6.011888926 | 0.40496758  |
| GLTPD2    | -0.020092638 | 5.937970559 | 0.405053319 |
| PPP4R2    | -0.022691902 | 6.129788264 | 0.40505949  |
| LOC643216 | -0.028018372 | 6.022896933 | 0.405116605 |
| AQP12A    | 0.024709333  | 6.266840126 | 0.405132452 |
| LOC647704 | -0.018676741 | 6.113279425 | 0.40523627  |
| FAM127C   | -0.032628456 | 6.748570796 | 0.405325044 |
| LOC648489 | 0.017997254  | 6.056381406 | 0.405547065 |
| LOC729254 | -0.019985398 | 6.187819364 | 0.405591298 |
| TDO2      | -0.014932333 | 5.951190789 | 0.40560248  |



## DEG.infomation

|           |              |             |             |
|-----------|--------------|-------------|-------------|
| LOC644774 | 0.074444856  | 9.732370064 | 0.40580917  |
| GALNT9    | 0.011605977  | 6.076825702 | 0.405882021 |
| PSMA8     | 0.023014926  | 5.941563691 | 0.405938854 |
| F13B      | -0.020749097 | 5.935242514 | 0.405946172 |
| LOC728760 | -0.013842265 | 6.019596798 | 0.405951795 |
| NLRP4     | 0.024023965  | 6.005024588 | 0.406044418 |
| IGFL1     | -0.022493527 | 6.054146141 | 0.406071449 |
| MARCKS    | 0.055113456  | 10.06973204 | 0.406155949 |
| LOC650580 | 0.040140259  | 6.727577805 | 0.406297691 |
| LOC343052 | 0.032364667  | 6.070436899 | 0.40636282  |
| FLJ12688  | -0.022796285 | 6.182828115 | 0.406420006 |
| LOC644781 | 0.019093633  | 6.146642927 | 0.40659162  |
| CDH12     | -0.020168622 | 5.936441494 | 0.406630985 |
| MRP63     | 0.02818983   | 7.362244286 | 0.406643212 |
| LY6H      | -0.017402044 | 6.247765914 | 0.406698783 |
| LOC644611 | -0.027451469 | 6.102775819 | 0.40676453  |
| PTRF      | -0.075249845 | 11.42269205 | 0.406910576 |
| LOC642504 | 0.019873329  | 5.935204264 | 0.406916751 |
| LOC646300 | -0.01527947  | 6.069628671 | 0.40692057  |
| TRR1      | 0.019387639  | 5.999564502 | 0.406920928 |
| PTGR1     | -0.07001405  | 8.466613826 | 0.407027999 |
| LOC644184 | -0.020373239 | 5.985145387 | 0.407052807 |
| LOC729003 | -0.019467133 | 5.9394587   | 0.407089504 |
| C10ORF129 | -0.014797572 | 5.970216277 | 0.407094685 |
| LOC649417 | -0.022025382 | 6.332128676 | 0.407102402 |
| HMX1      | 0.020680416  | 6.103342001 | 0.407168951 |
| LOC646566 | 0.022321956  | 5.964484236 | 0.407353592 |
| FLJ40244  | 0.023242822  | 5.847194442 | 0.40735842  |
| UPB1      | -0.036366436 | 6.498034618 | 0.407369366 |
| PVRIG     | -0.022416737 | 5.963806429 | 0.407371062 |
| PLA2G10   | 0.023318308  | 6.0777653   | 0.407385687 |
| CCDC150   | 0.020455617  | 6.037117075 | 0.407411169 |
| LOC440607 | 0.020049781  | 6.076764014 | 0.407449195 |
| KRTAP10-9 | -0.014684688 | 6.199558375 | 0.407480425 |
| FBF1      | 0.014932487  | 6.101823789 | 0.407596009 |
| LOC654155 | 0.032542975  | 7.119530562 | 0.407746846 |
| TBC1D29   | -0.024862626 | 5.870855242 | 0.407822609 |
| CDCP2     | -0.021462742 | 5.99677709  | 0.407914779 |
| LOC651746 | 0.02518557   | 5.937639826 | 0.407998542 |
| IFLTD1    | 0.02164647   | 5.937010329 | 0.40805194  |
| KIF18B    | 0.014785064  | 6.036032105 | 0.408223717 |
| C5ORF15   | -0.036990982 | 10.25413211 | 0.408278661 |
| CHCHD2    | -0.03949616  | 12.87858375 | 0.408292438 |
| C20ORF3   | -0.062765075 | 7.691575952 | 0.408302875 |
| LOC644999 | -0.020725524 | 6.136164557 | 0.408316114 |
| GSTM1     | 0.062115554  | 9.722820777 | 0.408423136 |
| CEP76     | 0.023113233  | 6.170764513 | 0.408514799 |
| OR1D2     | 0.023233138  | 6.16046248  | 0.40856577  |
| LOC642782 | 0.013344254  | 6.030449818 | 0.408605026 |
| PCDHGB3   | 0.021052217  | 6.082878736 | 0.408638075 |
| WDR75     | 0.031332276  | 8.964072381 | 0.408645059 |

## DEG.infomation

|              |              |             |             |
|--------------|--------------|-------------|-------------|
| TYR          | -0.023790669 | 6.021156169 | 0.408696951 |
| C6ORF174     | 0.023000067  | 5.976085187 | 0.408789382 |
| LOC644844    | 0.024143284  | 6.447807276 | 0.408810538 |
| ARPM2        | -0.020561246 | 5.976814514 | 0.408812152 |
| TPRXL        | 0.013610488  | 5.982306677 | 0.40894264  |
| DNAJC12      | 0.047883891  | 7.268062815 | 0.408948547 |
| GDAP1L1      | -0.022479962 | 6.177953932 | 0.409013582 |
| LOC128322    | 0.021581064  | 6.230371345 | 0.409113091 |
| LOC642655    | -0.023215876 | 6.004955188 | 0.409118111 |
| EML5         | 0.014585748  | 6.042986007 | 0.409127867 |
| LOC391509    | -0.0298203   | 6.055196678 | 0.409213468 |
| SARS2        | 0.063630044  | 7.692632433 | 0.409236002 |
| FUT3         | 0.020770167  | 6.068267652 | 0.409543679 |
| COCH         | 0.021210464  | 6.296612361 | 0.409696665 |
| TRIB2        | 0.050185172  | 7.87768421  | 0.409719486 |
| LOC651401    | -0.018183533 | 6.084292019 | 0.409877349 |
| LOC440498    | 0.039905779  | 6.295986124 | 0.409886835 |
| WDR64        | 0.019825536  | 6.111425967 | 0.409895607 |
| TTC6         | -0.019938991 | 5.953338754 | 0.409951882 |
| GRID2        | -0.022835408 | 5.978316429 | 0.409999362 |
| LOC650036    | 0.03344689   | 5.984374647 | 0.410029612 |
| ZNF22        | -0.028478565 | 8.982282128 | 0.410099803 |
| OR52B6       | 0.021745497  | 6.216467333 | 0.41043624  |
| AHRR         | 0.024019721  | 6.028576253 | 0.410456972 |
| AIP          | -0.041698561 | 8.779561318 | 0.410520067 |
| AIPL1        | -0.015474901 | 6.198811837 | 0.410542159 |
| PANX3        | 0.022213785  | 6.23446032  | 0.410543646 |
| LOC654023    | -0.021164248 | 6.142579458 | 0.410626912 |
| LOC645574    | -0.030210801 | 6.264835429 | 0.410630111 |
| C17ORF68     | 0.01921299   | 6.859011511 | 0.410633126 |
| GP9          | -0.021264869 | 5.922127613 | 0.410638865 |
| FLJ13305     | 0.030973706  | 6.539832868 | 0.410657461 |
| BHMT         | 0.021739441  | 5.86292694  | 0.410680832 |
| CISH         | 0.068298173  | 6.982265891 | 0.410775649 |
| C1ORF55      | -0.039692793 | 7.805750007 | 0.41083558  |
| PLCD4        | 0.022919008  | 6.129471791 | 0.410890231 |
| CPT1A        | -0.016092377 | 6.421901081 | 0.410893413 |
| RP11-45B20.2 | 0.01702361   | 6.18240421  | 0.410904371 |
| TMEM133      | -0.034652372 | 6.143800196 | 0.411128723 |
| RGS13        | 0.016349273  | 6.097409126 | 0.411173237 |
| DRD5         | 0.019132437  | 5.995908694 | 0.411346526 |
| FAM122C      | -0.021231462 | 6.109221935 | 0.411481139 |
| LOC652441    | 0.025454424  | 5.962603067 | 0.411551173 |
| GABRG3       | -0.020810868 | 6.03958352  | 0.411600929 |
| LOC642588    | 0.020076473  | 5.961300579 | 0.411621403 |
| UNC13D       | -0.027044117 | 6.31052903  | 0.411634618 |
| OR2T5        | 0.02182831   | 5.964150972 | 0.411641435 |
| LOC642334    | 0.014311928  | 6.056057916 | 0.411658228 |
| CTRB2        | 0.019662366  | 6.133418817 | 0.411703336 |
| LOC643719    | 0.018803151  | 6.224352078 | 0.411776903 |
| TMC3         | -0.022843788 | 6.210196462 | 0.411867341 |

## DEG.infomation

|           |              |             |             |
|-----------|--------------|-------------|-------------|
| PPM1M     | -0.040472301 | 7.999419665 | 0.411893892 |
| LOC644366 | -0.031902223 | 6.162205207 | 0.411917209 |
| USP35     | 0.024391266  | 6.42548533  | 0.41197503  |
| LOC648794 | -0.019832671 | 6.017320278 | 0.412005497 |
| KRTAP4-4  | -0.020854948 | 5.978228539 | 0.412285271 |
| TMEM34    | 0.030956631  | 6.90555999  | 0.412360259 |
| JSRP1     | -0.0287461   | 6.071344789 | 0.412411472 |
| TIFAB     | -0.015070528 | 6.048955533 | 0.412438253 |
| C21ORF74  | -0.01913025  | 6.048472078 | 0.412584713 |
| FLJ34870  | -0.017358035 | 6.066963275 | 0.412657412 |
| GSTTP1    | -0.022365297 | 5.960781069 | 0.412690639 |
| FAM113B   | -0.030768022 | 6.604296615 | 0.412723318 |
| MTMR8     | 0.022454171  | 5.991913498 | 0.41283887  |
| LOC441241 | -0.025336635 | 6.592412774 | 0.413048741 |
| KIAA0406  | 0.023002628  | 6.850193385 | 0.413084765 |
| LOC389791 | -0.022798389 | 6.237068658 | 0.413112767 |
| RLBP1L2   | -0.022034476 | 6.055578893 | 0.413121936 |
| C8ORF17   | 0.020480605  | 5.991944286 | 0.413127837 |
| C21ORF93  | 0.01854783   | 6.151306781 | 0.413242926 |
| ARL13B    | 0.023683781  | 6.12336602  | 0.413315323 |
| RPL32     | -0.040599524 | 11.58525415 | 0.413365244 |
| FLJ90680  | -0.017587445 | 6.285178286 | 0.413368974 |
| LOC643412 | 0.018285812  | 6.114028007 | 0.413409825 |
| FLJ27465  | 0.016954408  | 6.192315206 | 0.41352587  |
| DCST1     | -0.024783767 | 6.137178221 | 0.413704143 |
| LOC651974 | 0.021117082  | 6.026528429 | 0.413705002 |
| LOC653830 | -0.023100761 | 5.794740424 | 0.413773672 |
| LOC652222 | -0.026037566 | 6.036598061 | 0.413824803 |
| TMEM63C   | 0.028764459  | 6.315765718 | 0.414068154 |
| ACTA1     | -0.061049568 | 14.72133392 | 0.414131145 |
| ZNF395    | -0.046653315 | 8.471660323 | 0.414163045 |
| LOC651638 | -0.022254649 | 5.948253373 | 0.41437342  |
| OGFOD2    | -0.023349949 | 6.315236164 | 0.414407246 |
| LOC642456 | 0.024111729  | 6.318959085 | 0.414568495 |
| IQCF2     | 0.021587813  | 6.048125401 | 0.414643931 |
| C1ORF118  | -0.027274917 | 6.04731628  | 0.414675979 |
| LOC387720 | -0.021484632 | 6.117816758 | 0.414724962 |
| LOC652065 | 0.022532564  | 5.952878139 | 0.414791025 |
| LUC7L2    | -0.023529289 | 6.855854383 | 0.415043537 |
| LOC643935 | 0.023549911  | 6.231609036 | 0.415056155 |
| CD2AP     | -0.032864836 | 6.616710102 | 0.415058938 |
| UCN       | 0.025306595  | 6.38057404  | 0.415122561 |
| EFNB3     | 0.037682386  | 6.287505599 | 0.415377287 |
| PDE7B     | -0.079815931 | 8.655518931 | 0.415386466 |
| PCDHGA9   | 0.018233073  | 6.166837572 | 0.415405223 |
| GLTSCR2   | 0.033755635  | 12.31216958 | 0.415443771 |
| IFNA5     | 0.024459427  | 5.937423454 | 0.415445773 |
| LOC650976 | -0.021114073 | 6.108437806 | 0.415563501 |
| C12ORF48  | -0.02290866  | 6.447182294 | 0.415584601 |
| ZCCHC4    | 0.022879184  | 6.292006839 | 0.415616291 |
| JPH4      | 0.022249223  | 6.074791866 | 0.415759631 |

## DEG.infomation

|           |              |             |             |
|-----------|--------------|-------------|-------------|
| LXN       | 0.050678037  | 7.416114296 | 0.415810248 |
| CD3G      | -0.019559577 | 6.126415279 | 0.415877075 |
| LOC653216 | -0.01665648  | 6.031085045 | 0.41590784  |
| LOC390332 | 0.022150827  | 6.046868287 | 0.41596727  |
| ALG11     | -0.036074491 | 6.569666366 | 0.415984723 |
| LOC284371 | 0.024711633  | 6.202279831 | 0.416043973 |
| CRIP1     | 0.080762643  | 9.561809013 | 0.416077127 |
| LOC389199 | -0.020330208 | 6.037640578 | 0.416111492 |
| COX6A2    | 0.044399067  | 12.54205414 | 0.416114276 |
| FRMPD2L1  | -0.014972318 | 5.92624158  | 0.416208408 |
| CBX1      | -0.045722675 | 6.553540949 | 0.416254515 |
| C3ORF25   | -0.020622941 | 6.208251317 | 0.416296925 |
| MEMO1     | 0.039389831  | 7.94213973  | 0.416369752 |
| LOC651123 | 0.02769833   | 6.006496765 | 0.416431611 |
| SLCO4C1   | -0.022280855 | 6.065119404 | 0.41649277  |
| MGC12760  | -0.029016063 | 6.454588237 | 0.41651259  |
| CHST11    | 0.027607879  | 6.008208885 | 0.416565758 |
| CDADC1    | -0.02056038  | 6.311570096 | 0.416727828 |
| DNAH3     | -0.020278628 | 6.054395263 | 0.416796871 |
| LOC645964 | 0.022351015  | 5.917047371 | 0.41681976  |
| WDR40C    | -0.022864081 | 6.034551523 | 0.416865648 |
| FCRL4     | 0.021702736  | 5.828849132 | 0.416887317 |
| HCRTR1    | 0.021142961  | 6.040549269 | 0.41695917  |
| OR2L1P    | -0.015320088 | 5.957333068 | 0.417032449 |
| DPRX      | -0.029844049 | 6.153002514 | 0.417047628 |
| LOC727815 | 0.01501466   | 6.065148356 | 0.417170794 |
| LOC641901 | 0.021694569  | 6.024632408 | 0.417172436 |
| XYLT2     | -0.03146456  | 8.663732594 | 0.417280043 |
| SPATA5    | 0.013675123  | 6.153255413 | 0.417318079 |
| EIF1AY    | 0.406850301  | 8.797682912 | 0.417384055 |
| SLC22A13  | 0.021156553  | 6.142384472 | 0.417617096 |
| NRL       | 0.020200506  | 6.056046354 | 0.417713923 |
| LOC646191 | -0.025145704 | 6.047230391 | 0.417735001 |
| LOC257358 | 0.02076226   | 6.033729179 | 0.417802638 |
| LOC647993 | -0.028407993 | 6.006984482 | 0.417811911 |
| PRKY      | 0.066538247  | 6.343685738 | 0.417812068 |
| OR6C70    | 0.020842213  | 5.926540205 | 0.417838232 |
| C2ORF62   | -0.022463196 | 6.0331482   | 0.417932404 |
| FAM3A     | 0.045802795  | 9.908200237 | 0.417996874 |
| LOC642351 | 0.020979049  | 6.138744539 | 0.418010113 |
| TBK1      | 0.02987728   | 8.378742452 | 0.418105117 |
| FLJ43692  | -0.034218238 | 6.550466701 | 0.418117814 |
| LOC652331 | 0.01887224   | 5.9641401   | 0.418131434 |
| TTBK1     | 0.018775165  | 6.044894365 | 0.418164196 |
| FLJ46363  | 0.019835564  | 6.206014052 | 0.418196422 |
| CUL3      | -0.024773955 | 6.200069559 | 0.418236732 |
| FAM3B     | -0.016490577 | 5.971968925 | 0.418244397 |
| PKN1      | 0.045959986  | 6.972035374 | 0.418290261 |
| IL17RE    | -0.016212488 | 6.011729576 | 0.418361049 |
| LOC651916 | 0.025499761  | 6.183613247 | 0.418361909 |
| PRDM15    | 0.01815493   | 6.049219677 | 0.418487004 |

## DEG.infomation

|             |              |             |             |
|-------------|--------------|-------------|-------------|
| ST6GALNAC3  | -0.041606902 | 6.695942722 | 0.418539878 |
| LOC648245   | 0.017716203  | 6.13503257  | 0.418828647 |
| LOC651647   | -0.021273542 | 6.061332332 | 0.418844371 |
| LOC643035   | 0.028591501  | 6.743701101 | 0.418857957 |
| OR12D3      | 0.016893669  | 5.915441059 | 0.418942681 |
| OR4S1       | 0.022333274  | 6.141211186 | 0.418960569 |
| LOC642904   | -0.021105424 | 6.086122298 | 0.418964164 |
| LOC728145   | 0.016713248  | 6.086560962 | 0.418966544 |
| LOC643883   | 0.021594991  | 6.033964157 | 0.418972235 |
| ZNF300      | -0.020997981 | 6.087591466 | 0.418991562 |
| LOC651701   | -0.020309363 | 6.054152929 | 0.419000286 |
| CICK0721Q.1 | 0.019122236  | 6.114386438 | 0.419001582 |
| LOC651055   | 0.019413572  | 6.054403472 | 0.419171775 |
| ZNF530      | -0.018515526 | 6.185564034 | 0.419277993 |
| MIP         | -0.028658162 | 5.82172763  | 0.41931606  |
| OMP         | 0.021338676  | 5.893400668 | 0.419381905 |
| MVK         | 0.017970712  | 6.640684681 | 0.419385835 |
| LOC645974   | -0.025369054 | 6.091050246 | 0.419389195 |
| CACNG8      | 0.016255364  | 6.193763905 | 0.419556054 |
| C11ORF66    | 0.020632878  | 6.227123967 | 0.419635277 |
| HIST1H1D    | -0.019449687 | 6.164060103 | 0.41966275  |
| KIAA1545    | 0.045975309  | 7.766288618 | 0.419840714 |
| FPGS        | 0.014857839  | 6.129640621 | 0.41987421  |
| LOC652742   | -0.020038165 | 6.011047848 | 0.420119498 |
| TIMM17A     | -0.024052582 | 6.631534732 | 0.420150154 |
| CCNB1       | 0.022567336  | 6.114433194 | 0.420156825 |
| LOC400388   | 0.019184937  | 6.214693181 | 0.420185561 |
| FLJ42842    | 0.020740085  | 6.020806112 | 0.420280218 |
| RPP38       | -0.01891478  | 6.417854197 | 0.420313702 |
| LOC650659   | 0.018613463  | 6.019890885 | 0.420381106 |
| VHLL        | -0.018039935 | 6.036512135 | 0.420430526 |
| HIST1H3G    | -0.022943323 | 6.248061332 | 0.420435003 |
| LOC642864   | -0.021182005 | 5.94079805  | 0.420446567 |
| SYCP3       | -0.014397143 | 6.159751413 | 0.420475596 |
| WDR49       | -0.013462365 | 6.123952947 | 0.4205266   |
| SEMA6A      | 0.042624504  | 8.206992737 | 0.420732027 |
| TALDO1      | -0.029509496 | 9.815189344 | 0.420787105 |
| LOC653773   | 0.05788453   | 10.97807919 | 0.420798499 |
| LOC653715   | 0.020561993  | 6.155583712 | 0.420825114 |
| LOC644638   | -0.024354202 | 6.213426622 | 0.421043464 |
| MED13L      | -0.028761149 | 6.50821419  | 0.421048546 |
| LOC647844   | 0.019795176  | 6.110773053 | 0.421086453 |
| CCDC57      | 0.015274849  | 6.085749086 | 0.421294016 |
| LOC642134   | -0.020051764 | 6.04043868  | 0.421303604 |
| P2RX3       | 0.014893343  | 6.03525445  | 0.421307399 |
| LOC652437   | 0.023913319  | 5.964435554 | 0.42144297  |
| ABCA6       | -0.04356231  | 7.581030393 | 0.421471573 |
| LHFPL5      | -0.018902761 | 5.896929246 | 0.421536219 |
| GBP3        | -0.047744671 | 8.3396398   | 0.421611843 |
| ADAMTS10    | -0.02097385  | 6.140794251 | 0.421614077 |
| CLIC5       | 0.090981682  | 9.972854564 | 0.421638752 |

## DEG.infomation

|           |              |             |             |
|-----------|--------------|-------------|-------------|
| ZBTB1     | 0.021691356  | 6.063349758 | 0.421658142 |
| LRP2BP    | -0.024144233 | 6.290963897 | 0.421660326 |
| C9ORF62   | 0.028668876  | 6.567114086 | 0.421697081 |
| NCR1      | -0.025202514 | 6.011930011 | 0.421697664 |
| CCNA2     | 0.024641935  | 6.287449807 | 0.421751853 |
| SIRT2     | -0.033784007 | 7.012576665 | 0.421853257 |
| MMRN2     | 0.035112146  | 6.427718234 | 0.421923195 |
| LOC641834 | -0.017769582 | 6.245696027 | 0.421990446 |
| WFS1      | -0.066669263 | 10.49136118 | 0.422098822 |
| LOC391004 | -0.021154199 | 5.967302549 | 0.42212137  |
| LOC652508 | 0.023138834  | 6.414742487 | 0.422166327 |
| CSAG2     | 0.020457507  | 5.898649814 | 0.422170369 |
| LOC643958 | -0.020281162 | 6.025527289 | 0.422170828 |
| SYT9      | 0.022346312  | 6.09338423  | 0.422196148 |
| SLC16A11  | -0.019784391 | 5.984058788 | 0.422217446 |
| LOC651952 | 0.02019426   | 6.126356467 | 0.422234229 |
| LOC732107 | -0.019265846 | 6.111480057 | 0.422257983 |
| LOC649635 | -0.022568088 | 6.000395026 | 0.422322932 |
| CERK      | -0.03187219  | 9.593110613 | 0.422349401 |
| LOC644295 | 0.025887209  | 6.186485593 | 0.422428608 |
| LOC348021 | 0.022449752  | 6.140529773 | 0.422450318 |
| FABP5L7   | -0.021104634 | 6.097771501 | 0.422477299 |
| TMEM61    | -0.021520213 | 6.11439068  | 0.422521496 |
| TREH      | -0.022030313 | 6.142323011 | 0.422637765 |
| TRIM40    | 0.02162376   | 6.018422118 | 0.422664147 |
| LOC643325 | -0.018790196 | 6.141612285 | 0.422665141 |
| ENTPD8    | 0.012164175  | 5.989266277 | 0.422704581 |
| HBG2      | -0.051751173 | 6.172335624 | 0.422784465 |
| LENG8     | 0.022552431  | 6.435013313 | 0.422902016 |
| FLJ32682  | 0.017755548  | 6.010002279 | 0.422979017 |
| NKX2-6    | 0.018697032  | 6.088721796 | 0.423028475 |
| USP36     | -0.034555404 | 6.607112888 | 0.423045503 |
| LOC646381 | 0.021225703  | 6.212352591 | 0.423058191 |
| ANKS1A    | 0.043121101  | 9.437545415 | 0.423069108 |
| LOC729487 | 0.021107665  | 6.159938887 | 0.423107507 |
| LOC647275 | 0.022438994  | 6.043053661 | 0.423125214 |
| PRPF38B   | 0.02106549   | 6.661497971 | 0.42317589  |
| RBM42     | -0.037695311 | 8.84256236  | 0.423185051 |
| C20ORF114 | -0.020255806 | 6.07894976  | 0.423242383 |
| LOC644404 | 0.023768881  | 6.091680297 | 0.423249327 |
| TET2      | 0.021555995  | 6.078783944 | 0.423258769 |
| ATXN7     | 0.02648156   | 5.991698147 | 0.423317459 |
| ACSM4     | 0.01735685   | 6.008707032 | 0.423413968 |
| LOC644912 | -0.020168289 | 5.951156788 | 0.423450293 |
| LOC391859 | -0.02047231  | 6.208727809 | 0.423463079 |
| NUBP2     | 0.029753942  | 6.956261994 | 0.423508632 |
| LOC645721 | -0.022761553 | 5.968590621 | 0.423605785 |
| UBASH3A   | -0.018265929 | 6.094414232 | 0.423620511 |
| LOC652879 | 0.019247411  | 5.998117844 | 0.423625587 |
| LOC642105 | 0.021033256  | 6.116407139 | 0.42369499  |
| KCTD4     | 0.021735546  | 6.001328685 | 0.423753215 |

## DEG.infomation

|           |              |             |             |
|-----------|--------------|-------------|-------------|
| C10ORF61  | -0.019873279 | 6.760046823 | 0.423810488 |
| LOC650761 | -0.016537781 | 6.032184388 | 0.423833076 |
| LOC391037 | -0.01739988  | 6.084638368 | 0.423846527 |
| LOC728534 | 0.018801056  | 6.081514889 | 0.423851443 |
| LOC653305 | 0.022338461  | 6.061807784 | 0.424087511 |
| LOC643936 | 0.014373889  | 6.026137492 | 0.424144901 |
| LOC652533 | 0.028083378  | 6.041918678 | 0.424199317 |
| TSPAN2    | -0.02064995  | 6.009534116 | 0.424207893 |
| LOC653683 | 0.017822383  | 6.056895701 | 0.424318008 |
| LOC650116 | 0.03472694   | 7.226234697 | 0.424370936 |
| GDPD4     | -0.019493461 | 6.257813612 | 0.42455003  |
| LOC645451 | 0.021398625  | 5.939237672 | 0.424550893 |
| ST3GAL5   | -0.028160208 | 6.631070346 | 0.424575917 |
| LAMC1     | 0.032089546  | 11.71606562 | 0.424739834 |
| RDH14     | 0.036558609  | 10.74399362 | 0.424888817 |
| HDAC7A    | 0.024850549  | 6.404356029 | 0.424978339 |
| LOC648274 | -0.020185327 | 5.951784784 | 0.425007305 |
| LOC440268 | -0.018903095 | 6.023160385 | 0.425051022 |
| THSD7A    | 0.027997744  | 6.102464548 | 0.4250762   |
| SH2D2A    | -0.023398529 | 6.290950518 | 0.425197869 |
| LOC401914 | -0.019779796 | 6.174182655 | 0.425303591 |
| PMP22CD   | 0.019382591  | 6.131048196 | 0.425319081 |
| RPS6KA3   | 0.017878202  | 6.519141383 | 0.425356734 |
| SLA2      | -0.014504223 | 6.026931304 | 0.425363495 |
| LOC729919 | -0.021002758 | 6.080726157 | 0.425372729 |
| LOC649896 | 0.023882756  | 5.962908329 | 0.42541609  |
| RBM43     | 0.020810062  | 6.079746631 | 0.425450708 |
| LOC643748 | 0.02150827   | 5.975846388 | 0.42556241  |
| FLJ44477  | 0.021114472  | 6.263850722 | 0.425587354 |
| C6ORF52   | 0.024051227  | 6.330033759 | 0.425625119 |
| LOC649578 | -0.021677566 | 5.987664712 | 0.425664695 |
| ZNF567    | -0.01577895  | 6.194870682 | 0.425693131 |
| LOC652628 | -0.022361012 | 6.373892675 | 0.425705703 |
| SLITRK1   | -0.016457374 | 6.040523254 | 0.425774888 |
| C9ORF36   | 0.015134505  | 6.018445821 | 0.425778477 |
| LOC646537 | -0.026237148 | 6.042181649 | 0.425888685 |
| DULLARD   | 0.051549774  | 7.329894181 | 0.425961053 |
| DDI2      | -0.013749832 | 6.126271917 | 0.425989096 |
| LOC643055 | 0.01758091   | 5.936361615 | 0.42611732  |
| RD3       | 0.029470578  | 6.100593562 | 0.426153383 |
| RSRC1     | 0.036274716  | 7.203098399 | 0.426297355 |
| HMX2      | -0.02128261  | 6.128568615 | 0.426355019 |
| FYTTD1    | -0.048829908 | 8.390745379 | 0.426492252 |
| LOC730340 | -0.018491533 | 6.095329287 | 0.426642835 |
| LDHAL6A   | 0.023255304  | 6.261586338 | 0.426661507 |
| EPB41L4A  | 0.029735251  | 6.917960229 | 0.426711828 |
| LOC652792 | 0.022584662  | 6.082104586 | 0.426718959 |
| LOC642681 | 0.018934245  | 6.023711784 | 0.42680498  |
| FFAR3     | -0.021003078 | 6.303910959 | 0.426807825 |
| OR4C12    | 0.015057887  | 6.071229569 | 0.426813491 |
| LOC730833 | 0.026857538  | 5.99811653  | 0.42682355  |

## DEG.infomation

|           |              |             |             |
|-----------|--------------|-------------|-------------|
| LOC647666 | 0.017705863  | 5.933494472 | 0.42683083  |
| OCM       | 0.020929063  | 5.984837768 | 0.426883385 |
| DPYSL2    | -0.036196893 | 11.34532398 | 0.426892198 |
| EVPL      | 0.018876017  | 6.084009218 | 0.42702799  |
| LOC649397 | 0.017559076  | 6.316106496 | 0.427249904 |
| LOC400221 | -0.022618578 | 5.918574509 | 0.427593676 |
| GPR39     | 0.020243796  | 6.024044804 | 0.427622173 |
| LOC651896 | 0.01953715   | 6.052676775 | 0.427649928 |
| GGT7      | 0.030169341  | 6.40007359  | 0.427784744 |
| C9ORF110  | -0.033074149 | 6.046114129 | 0.427889341 |
| NUF2      | -0.014791064 | 6.001233064 | 0.427961322 |
| LOC644690 | -0.019107657 | 5.967550868 | 0.42796852  |
| LOC392467 | 0.016628771  | 6.058160743 | 0.427969733 |
| LOC644607 | -0.024805356 | 6.203075103 | 0.427981583 |
| LOC642340 | -0.025619063 | 6.017479399 | 0.427986021 |
| LOC649443 | -0.020553148 | 6.102048461 | 0.428167734 |
| FAM26A    | -0.019968772 | 5.933079345 | 0.428200039 |
| D21S2056E | 0.029542938  | 5.946787215 | 0.428259612 |
| C1ORF111  | 0.020666299  | 6.12073402  | 0.428260461 |
| ZNF780A   | 0.019948802  | 6.090819689 | 0.428320713 |
| FLJ44815  | 0.021625665  | 6.113299513 | 0.428342189 |
| C20ORF123 | 0.027682055  | 5.94895895  | 0.428456841 |
| TNFSF18   | 0.021512738  | 6.100103903 | 0.428526668 |
| LOC440013 | 0.012108977  | 6.02838608  | 0.428573656 |
| LOC646604 | -0.020025684 | 6.137609916 | 0.42860176  |
| LOC729355 | 0.020414566  | 6.28143587  | 0.428699063 |
| AFF2      | 0.021864175  | 6.174273219 | 0.428763541 |
| MS4A10    | -0.020144725 | 5.919326239 | 0.428791751 |
| LOC651760 | -0.01680177  | 5.972748414 | 0.428812204 |
| FOXR1     | -0.010947853 | 6.015187243 | 0.428932013 |
| TMEM127   | -0.031019038 | 7.225019416 | 0.428952141 |
| LOC652448 | -0.018158808 | 6.053488185 | 0.42899145  |
| ZNF44     | 0.019006015  | 6.029908689 | 0.429045115 |
| CCDC38    | 0.01915895   | 6.034287886 | 0.429074994 |
| LOC401923 | 0.01952517   | 6.00219595  | 0.429108371 |
| LOC650459 | 0.019648756  | 5.946672466 | 0.429199745 |
| ACRV1     | -0.015741919 | 6.136311302 | 0.429239941 |
| LOC653582 | -0.019506076 | 6.097980918 | 0.429309063 |
| ZNF286A   | 0.025030336  | 6.294239909 | 0.429367394 |
| FOXF1     | -0.028514064 | 6.072621469 | 0.429442132 |
| LOC150577 | 0.027467614  | 6.041664119 | 0.4296589   |
| KRT4      | -0.020961832 | 5.995241113 | 0.429977063 |
| FLJ34047  | -0.031340858 | 6.174335499 | 0.430287993 |
| LOC731283 | -0.021675261 | 5.918064159 | 0.430399084 |
| MAGOHB    | -0.025263731 | 6.051178899 | 0.430506624 |
| LOC653380 | 0.021347769  | 6.072790794 | 0.43061259  |
| ESRRG     | -0.042532673 | 7.944496072 | 0.430612711 |
| ARHGAP27  | -0.02894406  | 6.139244112 | 0.430637833 |
| C20ORF118 | -0.018385799 | 6.210209337 | 0.430640764 |
| LOC648438 | 0.016894759  | 6.044973563 | 0.430642008 |
| IL28RA    | -0.031101101 | 6.591643323 | 0.430647824 |



## DEG.infomation

|              |              |             |             |
|--------------|--------------|-------------|-------------|
| VSTM2        | 0.021301057  | 6.094185852 | 0.430677592 |
| GTF2A1L      | 0.012815178  | 6.097023489 | 0.430717474 |
| TRAF1        | 0.016337732  | 6.392404981 | 0.430778518 |
| UBE2NL       | -0.022053009 | 5.939979763 | 0.430832411 |
| RPH3AL       | -0.035516583 | 6.474870116 | 0.430875292 |
| SAMD4B       | -0.037969137 | 6.922551479 | 0.430882599 |
| LOC650180    | 0.020550281  | 6.057519223 | 0.431148109 |
| LOC643203    | -0.023168812 | 5.8854851   | 0.431324931 |
| PTH          | 0.01663261   | 5.929875338 | 0.431346146 |
| VSX1         | 0.011375421  | 6.01393606  | 0.431490537 |
| LOC645306    | -0.028200469 | 6.04295845  | 0.431492929 |
| MAGEB18      | 0.02319332   | 6.068018244 | 0.43149372  |
| PIP5KL1      | 0.024685282  | 6.211857716 | 0.431637816 |
| SLC26A7      | -0.01535049  | 6.048413062 | 0.431662143 |
| LOC649073    | -0.017540265 | 6.120338206 | 0.431703005 |
| GPRC5B       | 0.031725948  | 6.996917748 | 0.431720019 |
| KIAA2026     | -0.025051758 | 7.188869533 | 0.431885026 |
| GNG2         | 0.029111338  | 6.677829875 | 0.431912022 |
| KRT20        | -0.013062172 | 6.073399525 | 0.431952218 |
| DCI          | 0.05428085   | 10.04115946 | 0.432079308 |
| MEGF10       | 0.016078572  | 6.341314433 | 0.432082865 |
| C15ORF51     | -0.018720149 | 5.990017096 | 0.432111818 |
| C12ORF67     | 0.023442949  | 6.276545226 | 0.432151087 |
| FLJ45964     | -0.02334357  | 5.999430327 | 0.432157151 |
| DIAPH2       | 0.023635756  | 7.113627331 | 0.432199101 |
| LSM6         | -0.038889052 | 6.515511416 | 0.432203084 |
| LOC647156    | 0.020311809  | 6.025221071 | 0.432315659 |
| LOC643563    | 0.017562719  | 6.058753654 | 0.432441704 |
| PCNXL2       | 0.013191529  | 6.119920121 | 0.432458125 |
| LOC651293    | -0.023437125 | 5.932725149 | 0.432464088 |
| LOC648855    | 0.018488678  | 6.018448052 | 0.432474263 |
| LOC653750    | 0.021719157  | 6.213371199 | 0.432543187 |
| DNM1         | -0.032327327 | 6.162837476 | 0.43254776  |
| MDFI         | 0.036185007  | 5.934550837 | 0.432609517 |
| LOC727735    | -0.010910186 | 6.052030815 | 0.4327315   |
| CDH10        | 0.021510386  | 5.944017683 | 0.432748063 |
| OR52A5       | 0.017498515  | 6.583344965 | 0.432749938 |
| UBE2R2       | 0.033342225  | 6.29337463  | 0.432964922 |
| LOC646864    | -0.017228675 | 6.055060013 | 0.433063675 |
| LARS         | 0.030043357  | 9.460552916 | 0.433073891 |
| GALNAC4S-6ST | -0.055654289 | 7.270002135 | 0.433087063 |
| LOC641785    | -0.018887027 | 6.019963058 | 0.433170018 |
| ARL8A        | 0.027262791  | 6.111933542 | 0.433259497 |
| LOC646011    | -0.019096251 | 5.966423512 | 0.433341497 |
| BRAF         | 0.023990874  | 6.354679054 | 0.433341507 |
| LOC643261    | 0.018920276  | 5.920304779 | 0.433346448 |
| LOC220416    | 0.020435484  | 6.039172208 | 0.433447063 |
| MPZL3        | 0.025991353  | 6.18966106  | 0.433570832 |
| FCHSD2       | -0.039856419 | 8.400204814 | 0.433582778 |
| MMP17        | 0.011340684  | 6.055510015 | 0.433613574 |
| HTR4         | 0.012161128  | 6.156562829 | 0.433653718 |

## DEG.infomation

|           |              |             |             |
|-----------|--------------|-------------|-------------|
| LOC647726 | -0.019289694 | 6.17696402  | 0.433708414 |
| AKAP10    | 0.024879002  | 6.57695743  | 0.433876148 |
| LOC647480 | -0.02010871  | 6.000176595 | 0.433963371 |
| LOC650468 | -0.021291832 | 5.941105535 | 0.433972765 |
| LOC648732 | 0.017263943  | 6.109203001 | 0.434099882 |
| LOC649856 | -0.01877647  | 6.023918519 | 0.434156172 |
| LOC650922 | -0.029739123 | 5.847182482 | 0.434165575 |
| FGF8      | 0.014245208  | 6.033300318 | 0.434186755 |
| DNAHL1    | -0.026307099 | 5.872737915 | 0.434236905 |
| IL31RA    | 0.020494686  | 6.231144179 | 0.434242195 |
| SLC39A12  | -0.019335617 | 6.08426438  | 0.434346974 |
| TIFA      | 0.028393915  | 6.56447939  | 0.434365205 |
| NLGN4X    | 0.039726808  | 6.872220304 | 0.434381728 |
| NAF1      | -0.025899404 | 6.549267834 | 0.434501921 |
| PYGO2     | 0.028904015  | 6.453047868 | 0.434670994 |
| RSL1D1    | -0.041105808 | 9.585039154 | 0.43479986  |
| SERPINB13 | -0.024107556 | 5.890206669 | 0.434883087 |
| LOC642014 | 0.018841101  | 5.945349526 | 0.434969727 |
| LOC169834 | 0.018699857  | 5.96134655  | 0.43504616  |
| KCNK18    | 0.020103668  | 6.199971267 | 0.435053608 |
| OR5F1     | -0.015183093 | 6.075350825 | 0.435083585 |
| SLC18A2   | 0.017059155  | 5.974509389 | 0.435106792 |
| LOC729973 | -0.017758055 | 5.975807527 | 0.435169372 |
| LOC648556 | 0.017821785  | 6.136564049 | 0.435178171 |
| C8ORF30A  | -0.012457014 | 6.104544367 | 0.435221595 |
| LOC650200 | 0.021133448  | 6.074235615 | 0.43524563  |
| GRAP2     | -0.022433322 | 5.88286512  | 0.435321188 |
| PKHD1L1   | -0.025713129 | 6.236873814 | 0.435433471 |
| KLK14     | -0.019237821 | 6.03071093  | 0.43553443  |
| LOC643194 | -0.020375812 | 5.939240622 | 0.435546396 |
| MUC6      | -0.012347311 | 6.160903303 | 0.435601932 |
| ANKRD20B  | 0.013374117  | 5.939579367 | 0.435664432 |
| LOC390483 | 0.017734361  | 6.128058672 | 0.435816754 |
| LOC642366 | 0.025917742  | 5.995732182 | 0.435903385 |
| LOC389031 | 0.029517472  | 6.24829651  | 0.435911457 |
| ZBTB8     | 0.027736454  | 6.549727354 | 0.43595032  |
| LOC654096 | 0.031271035  | 6.161100284 | 0.436052708 |
| PTPN9     | -0.015848341 | 6.318111849 | 0.436192285 |
| LOC643441 | -0.0121837   | 6.048793418 | 0.436227186 |
| LOC643142 | -0.018251605 | 5.95276292  | 0.436287681 |
| CDK5R2    | 0.020028689  | 6.156936731 | 0.436339903 |
| JARID1A   | -0.033272231 | 7.316351254 | 0.436355165 |
| EXOSC8    | 0.032955173  | 8.848200686 | 0.436367054 |
| TTY13     | 0.01488276   | 5.948043651 | 0.436385677 |
| LOC652191 | -0.022515391 | 6.047524751 | 0.436462449 |
| LOC651576 | 0.017602679  | 6.086198936 | 0.436465426 |
| LOC651959 | -0.019973088 | 6.28351396  | 0.43648005  |
| PRSS12    | 0.023300341  | 6.115881191 | 0.436513706 |
| PRR17     | -0.018292805 | 6.003666921 | 0.436577554 |
| LOC644105 | -0.012992328 | 6.153965747 | 0.436626962 |
| CDC2L5    | 0.025543503  | 7.736326429 | 0.436697483 |

## DEG.infomation

|               |              |             |             |
|---------------|--------------|-------------|-------------|
| LOC646552     | 0.034828679  | 6.006025723 | 0.436734987 |
| NDRG4         | 0.050767169  | 10.93763583 | 0.436741715 |
| FNDC3A        | -0.052181429 | 7.47987708  | 0.436855436 |
| LOC650029     | -0.029610804 | 7.560740403 | 0.436912728 |
| P2RX6P        | 0.022363515  | 6.136365762 | 0.436937955 |
| LOC642033     | -0.040393735 | 7.129960218 | 0.437050972 |
| GLP1R         | -0.022073897 | 6.072765296 | 0.437056479 |
| IL1F9         | 0.019411     | 6.020955528 | 0.437171919 |
| HOXA11        | 0.022598478  | 6.049699551 | 0.437173924 |
| LOC653234     | -0.015112072 | 6.222924838 | 0.437212972 |
| AGR2          | 0.027728534  | 6.063415835 | 0.43726175  |
| ADAD1         | -0.019653025 | 5.870881768 | 0.437322248 |
| DMGDH         | 0.015472721  | 6.121858943 | 0.437351737 |
| C14ORF1       | 0.034305358  | 6.053038476 | 0.437358526 |
| LOC650285     | 0.021011195  | 5.996874466 | 0.437513209 |
| LRRC8E        | -0.020344328 | 6.234618287 | 0.437519902 |
| ZNF663        | 0.020546166  | 6.121376266 | 0.437561411 |
| LOC340549     | 0.026525082  | 6.178195684 | 0.437633807 |
| CLDN3         | 0.024329833  | 5.986807203 | 0.437641128 |
| ADCY5         | 0.057307883  | 7.663239803 | 0.437716973 |
| C10ORF72      | 0.022387465  | 6.363915217 | 0.437719783 |
| LOC338328     | -0.018425687 | 6.003784356 | 0.437767385 |
| FAM22F        | 0.017631038  | 6.35609964  | 0.437846927 |
| CRIM2         | 0.023375557  | 5.89656027  | 0.437946012 |
| MOBKL1A       | 0.042875078  | 6.307739785 | 0.438005062 |
| WFDC5         | 0.015350332  | 6.111595476 | 0.438012425 |
| SPATA17       | -0.024800964 | 5.968675089 | 0.438170365 |
| PCDHGA3       | 0.014376797  | 6.186953464 | 0.438272124 |
| LOC389124     | -0.017863956 | 6.448052837 | 0.438323649 |
| SEC23A        | -0.031832392 | 6.86063538  | 0.438349884 |
| C19ORF57      | 0.014859612  | 6.204105203 | 0.438357397 |
| IL2RB         | 0.039615534  | 6.20699853  | 0.438368119 |
| KIAA0738      | 0.021405042  | 6.094276989 | 0.438432979 |
| LOC653261     | 0.019483603  | 6.089444743 | 0.438443068 |
| OR4N5         | -0.017627564 | 6.011724813 | 0.438576486 |
| LOC645671     | -0.021669237 | 6.279606993 | 0.438613675 |
| LOC642361     | 0.025683255  | 6.930320229 | 0.43865022  |
| ONECUT3       | 0.020056931  | 5.997117317 | 0.43865296  |
| DKFZP779B1634 | -0.019429794 | 6.014130435 | 0.438713111 |
| CXORF61       | 0.020513446  | 6.055051242 | 0.438774126 |
| CEP170L       | -0.011098274 | 5.943453608 | 0.438782356 |
| SLC26A2       | -0.029591228 | 6.811976731 | 0.438999738 |
| LOC654085     | -0.024605984 | 5.907858695 | 0.439132199 |
| SH3MD4        | 0.019559528  | 5.984979273 | 0.439245049 |
| DMRTB1        | -0.019925323 | 6.114267724 | 0.439265722 |
| GP2           | 0.02728878   | 6.055124656 | 0.439415743 |
| SNTG2         | -0.022625134 | 6.137165162 | 0.439422482 |
| TRIP10        | -0.052367793 | 8.203181347 | 0.439578972 |
| LOC653051     | -0.018571562 | 6.090860728 | 0.439627181 |
| LOC648189     | 0.019927526  | 6.296270561 | 0.439655035 |
| FLJ42418      | 0.017697045  | 6.166704695 | 0.439663098 |

## DEG.infomation

|           |              |             |             |
|-----------|--------------|-------------|-------------|
| ADAM29    | 0.023821373  | 6.134104006 | 0.439756481 |
| LOC728734 | 0.033912449  | 7.50912674  | 0.439845175 |
| DMBT1     | 0.01463862   | 6.070185047 | 0.440024973 |
| INOC1     | -0.026437031 | 6.935426827 | 0.440034567 |
| C10ORF31  | 0.019300897  | 6.154753466 | 0.440060263 |
| LIPE      | 0.037934691  | 6.948307599 | 0.440099264 |
| LOC652843 | 0.018277908  | 6.171088828 | 0.440148169 |
| SYNE1     | -0.012509907 | 6.189715192 | 0.440280356 |
| PDC       | -0.012078879 | 6.082962288 | 0.440289649 |
| LOC643275 | -0.011645181 | 6.036654176 | 0.440300548 |
| LOC642120 | -0.019684322 | 6.086309755 | 0.440310042 |
| PCDHB14   | -0.021789845 | 6.354720705 | 0.440373116 |
| LOC652226 | 0.020246908  | 6.287689742 | 0.440379092 |
| SSSCA1    | -0.030454104 | 7.119147289 | 0.440552206 |
| CHTF18    | 0.024949811  | 6.363712382 | 0.440710189 |
| KLHL15    | -0.023907804 | 6.071104785 | 0.440858104 |
| TPRG1     | -0.019031301 | 6.055845047 | 0.440884521 |
| LOC645088 | -0.018579088 | 6.026884774 | 0.440971649 |
| TMPO      | 0.01351824   | 6.147646273 | 0.44099767  |
| C2ORF78   | 0.020548694  | 6.127077018 | 0.441045084 |
| LOC654208 | -0.017384937 | 5.980754738 | 0.44111328  |
| MED26     | -0.021305486 | 6.512490926 | 0.441119301 |
| LOC649486 | 0.018996895  | 6.091001763 | 0.441322913 |
| ING1      | 0.01345646   | 6.19951366  | 0.441496617 |
| WDTC1     | 0.033151935  | 6.022358868 | 0.441496933 |
| IGF2      | 0.026542247  | 6.48549774  | 0.441519203 |
| MAPK11    | -0.016549794 | 6.247242696 | 0.44162699  |
| PIH1D2    | 0.019534094  | 6.018852004 | 0.441761041 |
| LOC644133 | -0.019984154 | 6.105345958 | 0.441909364 |
| C6ORF107  | -0.018628428 | 6.246212251 | 0.441963869 |
| LOC342979 | 0.016302625  | 5.910514067 | 0.44200808  |
| NOM1      | -0.01661329  | 6.044356453 | 0.442042565 |
| LOC651621 | -0.020132143 | 6.276013403 | 0.442099055 |
| LOC653937 | -0.022010169 | 5.99226563  | 0.442100731 |
| LEFTY1    | -0.019567092 | 6.028995063 | 0.442152234 |
| LOC727944 | 0.028309374  | 6.016440524 | 0.442265546 |
| LAGE3     | 0.032787137  | 9.546502918 | 0.442328562 |
| LOC645789 | 0.01746868   | 5.897365661 | 0.442546717 |
| LOC641767 | -0.019332295 | 6.085675986 | 0.44265931  |
| FREM2     | -0.014927318 | 6.153773691 | 0.442796058 |
| TNXB      | -0.015999857 | 6.133636451 | 0.443165973 |
| ZNF622    | -0.061068113 | 10.74340002 | 0.443245555 |
| LOC643357 | 0.054276418  | 10.3212299  | 0.443265513 |
| LOC399753 | 0.010965818  | 6.032865494 | 0.443484004 |
| LOC651427 | -0.019092593 | 6.037348615 | 0.443539363 |
| LOC440157 | -0.03667552  | 6.978341359 | 0.44357669  |
| LOC648343 | 0.071037534  | 7.677307641 | 0.443637544 |
| ELAVL1    | -0.029849955 | 6.824976095 | 0.44368603  |
| LOC649125 | 0.016888074  | 6.07302566  | 0.443701434 |
| LOC642140 | -0.021307105 | 5.957680795 | 0.443727643 |
| PPP2R5E   | 0.041267259  | 9.574029453 | 0.44390914  |

## DEG.infomation

|           |              |             |             |
|-----------|--------------|-------------|-------------|
| LOC642119 | 0.016828943  | 6.008644781 | 0.443995449 |
| SLC12A3   | -0.018433863 | 5.895913087 | 0.444058782 |
| LOC645745 | 0.017490868  | 6.094161029 | 0.444087507 |
| DPY19L2P2 | 0.016159393  | 6.19177657  | 0.444089212 |
| SP1       | -0.028466637 | 7.776358635 | 0.444098907 |
| CEP164    | -0.027461356 | 6.71464375  | 0.444101963 |
| DUX1      | 0.01976485   | 6.157674044 | 0.444168739 |
| LOC647407 | 0.019322463  | 6.014976592 | 0.444440817 |
| CANX      | 0.036891983  | 9.19427584  | 0.444543076 |
| SIRT6     | 0.024123865  | 6.217380881 | 0.444564816 |
| TFEC      | -0.013374138 | 6.063511746 | 0.444658411 |
| SUNC1     | -0.017322162 | 6.326038211 | 0.444666675 |
| PCDHB6    | 0.014772593  | 6.018762322 | 0.444722857 |
| GPR77     | -0.019863218 | 5.898202181 | 0.444790705 |
| LOC648897 | 0.028445465  | 6.022828032 | 0.444877222 |
| LOC642849 | 0.016411614  | 6.025063396 | 0.444936209 |
| LOC344875 | 0.020074559  | 6.082269767 | 0.445030701 |
| CENTD3    | -0.038790065 | 9.429596076 | 0.445096404 |
| DLEC1     | 0.015467952  | 6.181501949 | 0.445118165 |
| FLJ20581  | 0.0150834    | 6.10025465  | 0.445131314 |
| AGC1      | -0.021724074 | 6.251253073 | 0.445131573 |
| FAM47C    | -0.015486069 | 6.121805426 | 0.445355665 |
| LOC389120 | 0.01813942   | 6.032501505 | 0.445509897 |
| USH1C     | 0.016044084  | 5.953041291 | 0.445562059 |
| POU3F4    | 0.020616738  | 6.26514717  | 0.445575368 |
| LOC286094 | 0.019785401  | 5.951841374 | 0.445740268 |
| C13ORF35  | -0.018240598 | 5.966077897 | 0.445759483 |
| FOXN3     | 0.016772831  | 6.186191414 | 0.445782406 |
| ZNF829    | -0.010995726 | 6.072359879 | 0.445867816 |
| C5ORF21   | 0.031354218  | 9.399414233 | 0.445897704 |
| GAGE5     | 0.040622388  | 6.076357658 | 0.445994028 |
| LRRN2     | 0.024094198  | 6.635501675 | 0.446071945 |
| LOC641522 | 0.021516702  | 6.370857501 | 0.446101246 |
| ERC2      | 0.022341436  | 6.121240428 | 0.446169468 |
| SNX2      | 0.034901043  | 8.653757598 | 0.446262204 |
| LOC644524 | -0.019758159 | 6.034628391 | 0.446266961 |
| GEMIN7    | 0.016319585  | 6.04443947  | 0.446576733 |
| LOC648659 | 0.040952081  | 6.588256036 | 0.446699017 |
| SEPT14    | 0.016760024  | 6.015150863 | 0.446715664 |
| OPN5      | 0.014829243  | 6.093313997 | 0.446940288 |
| GCM2      | 0.018697797  | 6.037883543 | 0.446964648 |
| GPR179    | 0.019806947  | 6.230994063 | 0.446980846 |
| SWAP70    | 0.040504802  | 9.072144644 | 0.447002074 |
| SPINK8    | 0.015837761  | 5.935436875 | 0.447068293 |
| CDC25A    | 0.016487189  | 6.146430941 | 0.447152718 |
| LOC648751 | 0.018001918  | 6.115441069 | 0.44715788  |
| LOC400578 | 0.014447233  | 6.014176828 | 0.44719622  |
| SPATA16   | -0.023486426 | 5.942047738 | 0.4473291   |
| C1ORF201  | 0.026876616  | 6.090915362 | 0.447679673 |
| LOC643397 | 0.020078075  | 6.086303387 | 0.447745663 |
| LOC387683 | -0.020408078 | 6.357805189 | 0.447766058 |

## DEG.infomation

|              |              |             |             |
|--------------|--------------|-------------|-------------|
| SNORD30      | 0.023899746  | 6.229792151 | 0.447777287 |
| TRHDE        | -0.018050358 | 5.962209549 | 0.447801122 |
| SSX2         | -0.009413483 | 6.063956924 | 0.447810826 |
| TXNDC8       | -0.017991727 | 6.038032934 | 0.447831148 |
| WDR52        | -0.019350709 | 6.522603071 | 0.447914625 |
| OR8H1        | -0.012718542 | 6.062926723 | 0.44802065  |
| LOC285735    | 0.019122793  | 6.018880146 | 0.448116694 |
| C19ORF29     | -0.018016552 | 6.664362117 | 0.448131253 |
| LOC440407    | 0.018445426  | 6.056492456 | 0.448149163 |
| LOC647742    | -0.018462461 | 6.124504315 | 0.448201334 |
| LOC649965    | -0.019118681 | 6.000256836 | 0.448230795 |
| HSD3B2       | -0.019747663 | 6.125654454 | 0.448300023 |
| LOC652324    | -0.023843169 | 6.59786119  | 0.448331499 |
| MLLT3        | -0.024030567 | 6.237664841 | 0.448334354 |
| LOC645287    | -0.019750985 | 5.896277535 | 0.448349156 |
| LOC644944    | 0.017340711  | 6.004147751 | 0.448354999 |
| LOC642740    | 0.023255391  | 6.236923538 | 0.448637339 |
| LOC645682    | -0.019125399 | 5.970989897 | 0.448653775 |
| C1ORF67      | -0.020046199 | 6.087498559 | 0.448740945 |
| KIAA0146     | -0.026602854 | 6.704835806 | 0.448883447 |
| HTN3         | 0.015814305  | 6.158610413 | 0.448889279 |
| MARCH4       | 0.019902211  | 5.984888425 | 0.448906096 |
| PTER         | -0.032811327 | 6.349327964 | 0.448945018 |
| EGR3         | -0.022773121 | 6.53324252  | 0.448998651 |
| CHCHD9       | -0.036116702 | 11.20995947 | 0.449064463 |
| LOC644224    | -0.019727421 | 6.113980704 | 0.449144046 |
| LOC647891    | -0.016063829 | 6.179599592 | 0.449334345 |
| MAP9         | 0.028891949  | 6.304594416 | 0.44941728  |
| CTAG2        | -0.027912038 | 6.093693285 | 0.449502981 |
| RAVER2       | 0.044760567  | 8.429182534 | 0.449503957 |
| ARL9         | 0.020835949  | 6.042018995 | 0.449517681 |
| KIAA0174     | 0.025372781  | 10.3504067  | 0.449588373 |
| TACSTD1      | -0.028033581 | 6.257525731 | 0.449630734 |
| KRTAP11-1    | -0.018978868 | 6.022395047 | 0.449706177 |
| RNF138P1     | -0.019618788 | 6.018906896 | 0.449730186 |
| OR11G2       | -0.02067294  | 6.150072321 | 0.449817718 |
| FAM20B       | -0.065008577 | 8.947986781 | 0.449862326 |
| LOC648481    | 0.020837895  | 6.049763957 | 0.449868424 |
| STK31        | -0.010439084 | 6.060073961 | 0.449881235 |
| KLHDC7B      | -0.020386366 | 5.956321501 | 0.449889033 |
| FLJ90036     | -0.020231815 | 6.02853049  | 0.449914663 |
| CACNA1F      | -0.0195946   | 5.997602526 | 0.449938684 |
| LOC648054    | -0.018772093 | 6.019168229 | 0.450150382 |
| DKFZP564C196 | -0.019278572 | 6.190145546 | 0.450188896 |
| LOC652139    | -0.01741292  | 5.8751352   | 0.450336188 |
| IRGC         | 0.019097784  | 5.997960632 | 0.450481084 |
| APOBEC4      | 0.017295471  | 5.924130918 | 0.45054796  |
| LOC729260    | -0.018122599 | 6.116527754 | 0.450585499 |
| ID4          | 0.028170378  | 6.043828415 | 0.450620377 |
| BOLL         | -0.009590924 | 5.999820689 | 0.450634082 |
| LOC729476    | 0.026241867  | 5.915161825 | 0.450687273 |

## DEG.infomation

|           |              |             |             |
|-----------|--------------|-------------|-------------|
| FLJ37673  | -0.019710716 | 6.062240239 | 0.450715997 |
| LOC255187 | 0.016737551  | 5.986505465 | 0.450745144 |
| LOC120824 | -0.019325855 | 6.047885925 | 0.450805138 |
| SLC39A2   | -0.018584012 | 6.014343253 | 0.450851507 |
| FLJ36116  | 0.018920781  | 6.158563475 | 0.450956454 |
| TRPM3     | -0.011953746 | 6.068685977 | 0.450961202 |
| TOP1P1    | -0.015621024 | 5.963157434 | 0.451202953 |
| LOC649452 | 0.020888077  | 6.064067744 | 0.451299143 |
| ABI1      | 0.039632621  | 6.934380531 | 0.451314829 |
| LOC651454 | -0.017957694 | 6.09090555  | 0.451408579 |
| LOC644689 | -0.025487407 | 6.160163063 | 0.451604211 |
| PEX14     | -0.026350474 | 7.15854475  | 0.451658741 |
| LOC648668 | -0.019152223 | 5.994754437 | 0.451699206 |
| SGK3      | 0.020472628  | 7.070455476 | 0.451726194 |
| LOC650638 | 0.02257753   | 6.098475937 | 0.451824904 |
| PZP       | 0.027035239  | 6.633754686 | 0.451901432 |
| AHCYL2    | 0.023508957  | 6.685873548 | 0.451987776 |
| LOC651886 | 0.020303499  | 6.032067289 | 0.452055946 |
| LOC441378 | 0.0219938    | 6.165957514 | 0.452148864 |
| LOC653219 | -0.017378009 | 6.230663746 | 0.452183651 |
| ZIC4      | 0.018097711  | 6.057440681 | 0.452187874 |
| LOC652679 | -0.034084303 | 5.901228886 | 0.452190491 |
| LOC731496 | -0.019889832 | 6.175188275 | 0.452217186 |
| OR10G3    | 0.022562058  | 6.077731296 | 0.45225636  |
| LOC645995 | 0.021464108  | 6.010866381 | 0.452269844 |
| C3ORF46   | 0.018497787  | 6.267024379 | 0.45227795  |
| NLRP10    | 0.016474085  | 6.244788757 | 0.452420758 |
| ZNF509    | 0.027818975  | 6.636677955 | 0.452513226 |
| C14ORF178 | 0.016221754  | 5.894693168 | 0.452553203 |
| PDF       | -0.015222694 | 6.147137279 | 0.452597046 |
| MGC10997  | 0.034136822  | 9.766660621 | 0.452598749 |
| LOC284441 | -0.019849229 | 6.109629167 | 0.452678451 |
| GUCA2B    | -0.019618987 | 6.108725069 | 0.452706539 |
| LOC650823 | 0.019671065  | 6.145436974 | 0.452710879 |
| DSP       | 0.046392444  | 9.093478034 | 0.452818373 |
| LOC644592 | -0.02074839  | 6.0597838   | 0.452848975 |
| MTDH      | -0.039079428 | 8.533927475 | 0.452926174 |
| LOC440082 | 0.016782967  | 6.117865318 | 0.453001871 |
| CTAG1B    | 0.017437815  | 6.094879314 | 0.453103648 |
| CADM2     | -0.02890563  | 6.120542519 | 0.453185131 |
| RCOR1     | 0.021315202  | 5.971264307 | 0.453248646 |
| WFDC10B   | -0.015568844 | 6.133846898 | 0.45329454  |
| LARP2     | -0.031466043 | 7.519415663 | 0.453312637 |
| IGHMBP2   | 0.02085504   | 6.667510886 | 0.453373786 |
| ZPBP      | -0.019711461 | 5.997644829 | 0.45345368  |
| LOC647509 | -0.021037871 | 6.02580714  | 0.453594759 |
| PRMT8     | -0.018708825 | 6.101159067 | 0.453596895 |
| MCART6    | 0.014196121  | 6.12904978  | 0.453660316 |
| UTP3      | 0.039752358  | 7.334960122 | 0.453773058 |
| LOC347411 | -0.020255384 | 6.059576979 | 0.453778598 |
| LOC653555 | 0.018754738  | 5.997623212 | 0.453807029 |

## DEG.infomation

|              |              |             |             |
|--------------|--------------|-------------|-------------|
| LOC653562    | 0.01717359   | 6.029442798 | 0.454025167 |
| RNF12        | -0.013168446 | 5.979300878 | 0.454034615 |
| LOC402715    | -0.018047988 | 6.035780854 | 0.454057065 |
| ZNF304       | 0.041565212  | 6.351069088 | 0.454073822 |
| ZNF470       | 0.021013923  | 6.364808377 | 0.454195227 |
| LOC149950    | 0.022039023  | 6.449389577 | 0.454202288 |
| DPRXP4       | -0.013352223 | 6.112950248 | 0.454285597 |
| EIF2S1       | -0.031526401 | 7.836150195 | 0.454306624 |
| ZNF75D       | -0.039045605 | 6.56378034  | 0.454454297 |
| WBSCR19      | -0.009121747 | 6.092394145 | 0.4545039   |
| PIP4K2C      | -0.027356785 | 7.020844837 | 0.454527926 |
| CCDC58       | 0.048681461  | 7.964545559 | 0.454660085 |
| LOC646829    | -0.017724756 | 6.006036446 | 0.454879792 |
| CHRN1        | 0.032122542  | 7.191389056 | 0.454902139 |
| LOC645662    | 0.018686061  | 6.182207902 | 0.454921737 |
| KMO          | 0.022372105  | 6.01177222  | 0.455211345 |
| KLK2         | -0.015669108 | 6.171292263 | 0.455289445 |
| C1ORF99      | 0.012975204  | 6.012415445 | 0.455322971 |
| LOC642109    | 0.02099415   | 6.354366581 | 0.455324955 |
| CUL2         | 0.023444809  | 8.92904349  | 0.455454785 |
| LOC653514    | 0.0167212    | 6.067206461 | 0.455463583 |
| C9ORF109     | 0.018918993  | 6.195651688 | 0.455503561 |
| DKFZP434P211 | 0.018540031  | 6.217763549 | 0.455731707 |
| MGC35440     | 0.020196411  | 6.167846637 | 0.455793474 |
| USP43        | -0.023677798 | 6.110172118 | 0.456097874 |
| EPS8L3       | -0.015167005 | 6.129916139 | 0.456106152 |
| LOC650323    | 0.018399135  | 5.909561537 | 0.456168871 |
| C9ORF135     | 0.01966238   | 6.033759929 | 0.456175788 |
| ZNF70        | -0.022232153 | 5.952178308 | 0.456194235 |
| GNRHR        | 0.020044312  | 5.929366453 | 0.456289608 |
| ZCCHC10      | 0.015026093  | 6.232443524 | 0.456390504 |
| LOC643429    | 0.018824271  | 5.985137773 | 0.456393944 |
| LOC648629    | 0.018751307  | 6.10707685  | 0.456396635 |
| LATS1        | -0.013201613 | 5.988268373 | 0.456466036 |
| LOC653746    | -0.024103082 | 5.925125146 | 0.456538101 |
| FFAR1        | -0.016662582 | 6.283149446 | 0.456546185 |
| RAB9P1       | -0.017505937 | 5.903219192 | 0.456592911 |
| MAP3K10      | -0.026703052 | 6.09926784  | 0.456692081 |
| TRPM2        | -0.013593819 | 6.212286289 | 0.456752547 |
| CHKA         | 0.020808286  | 6.922449317 | 0.456828532 |
| LOC649891    | -0.018250209 | 5.978730961 | 0.45702584  |
| LOC400759    | -0.036282733 | 6.242502741 | 0.457105996 |
| CLEC4M       | 0.016958543  | 5.946931199 | 0.457138657 |
| GREM2        | 0.017269337  | 6.019931187 | 0.457151563 |
| C17ORF78     | 0.019195868  | 6.022082371 | 0.457233192 |
| LOC649280    | -0.021691542 | 6.0618968   | 0.457276166 |
| LOC643920    | 0.017598734  | 5.982056286 | 0.457307878 |
| TAS2R7       | -0.01846574  | 5.944801265 | 0.457317425 |
| LOC441050    | 0.030528279  | 6.830276762 | 0.457342878 |
| OR2C1        | -0.02127932  | 5.942443329 | 0.457381039 |
| LIG4         | -0.017392511 | 6.381784581 | 0.457410552 |



## DEG.infomation

|           |              |             |             |
|-----------|--------------|-------------|-------------|
| LOC644499 | 0.019099829  | 6.278536496 | 0.457440083 |
| LOC644748 | 0.016689523  | 6.16682728  | 0.457440675 |
| LOC645165 | -0.019771219 | 6.510261476 | 0.457504486 |
| FLJ40288  | -0.020848496 | 6.077672587 | 0.457572832 |
| OR8U8     | -0.01835573  | 5.958128861 | 0.457592877 |
| FLJ20464  | -0.017685552 | 6.003225752 | 0.457675251 |
| BRD1      | -0.02380685  | 6.94047612  | 0.457766629 |
| GNAT3     | -0.012614347 | 5.946628853 | 0.457796787 |
| PNPLA5    | 0.021249328  | 5.962088136 | 0.45794563  |
| GRM6      | -0.018496826 | 5.925008477 | 0.458027694 |
| LOC652798 | -0.018336895 | 6.119918281 | 0.458051701 |
| NDUFA3    | -0.041512214 | 12.6264697  | 0.45806793  |
| LOC390387 | -0.011349466 | 5.958726834 | 0.458159477 |
| DLGAP3    | 0.019737333  | 6.002251306 | 0.458162114 |
| KLF5      | 0.037787795  | 6.218822687 | 0.458392756 |
| FOXN1     | -0.019530308 | 6.082285153 | 0.458560396 |
| LOC645655 | 0.020343835  | 5.962869704 | 0.458592512 |
| SLAMF7    | 0.022821693  | 6.070845787 | 0.458597263 |
| LOC653297 | 0.02002539   | 6.185339308 | 0.458754213 |
| LOC728012 | 0.014306373  | 6.123988715 | 0.458809143 |
| SLC7A9    | 0.024843964  | 6.769930537 | 0.458821333 |
| WSCD1     | 0.03657098   | 6.31703094  | 0.458839032 |
| LPP       | -0.059516594 | 10.35902163 | 0.45884483  |
| LOC284428 | -0.014219339 | 6.045760984 | 0.4589243   |
| LOC441362 | -0.020942024 | 5.917335393 | 0.459005806 |
| LOC400301 | 0.017959409  | 6.043767871 | 0.459080535 |
| LAMP2     | -0.023668658 | 9.058466994 | 0.459138537 |
| LOC642426 | 0.019709544  | 6.104001223 | 0.459232878 |
| MACROD1   | 0.059006503  | 9.106488827 | 0.459267092 |
| HIST1H2AJ | -0.017027791 | 6.064076115 | 0.459463154 |
| JRK       | 0.013180541  | 6.282068979 | 0.459467719 |
| PSCD2     | 0.020125219  | 6.959565228 | 0.459816357 |
| SFRS3     | 0.031455348  | 7.315027444 | 0.459825182 |
| TBRG1     | -0.018688802 | 6.1207894   | 0.459840891 |
| LOC649416 | 0.017403921  | 6.169356215 | 0.459845266 |
| TCP11     | -0.022392956 | 6.168808234 | 0.459864885 |
| PDPK1     | 0.022009631  | 7.669612887 | 0.459876712 |
| CUL7      | 0.020348167  | 6.255193757 | 0.459905985 |
| PCDHAC2   | 0.012115759  | 6.091984376 | 0.459933605 |
| OR9Q1     | -0.019584166 | 5.845028869 | 0.459950252 |
| TPPP2     | 0.018079921  | 5.987384198 | 0.460003013 |
| KIAA1210  | -0.021040572 | 6.141181465 | 0.460011615 |
| OR13C5    | 0.020598376  | 5.879351838 | 0.46002828  |
| SPINT2    | 0.058587668  | 7.36681085  | 0.460127477 |
| FLJ40296  | 0.009812106  | 6.027863336 | 0.460176369 |
| PGPEP1    | -0.032457249 | 6.16586313  | 0.46022439  |
| PCID2     | 0.032237276  | 11.09783797 | 0.460519847 |
| LOC402571 | 0.021116035  | 6.099822746 | 0.460621107 |
| LOC647163 | 0.020293659  | 6.016313628 | 0.46064232  |
| ALG12     | -0.022957213 | 6.611180762 | 0.460745434 |
| SAMD6     | 0.012040161  | 6.095478142 | 0.460823993 |

## DEG.infomation

|           |              |             |             |
|-----------|--------------|-------------|-------------|
| EAF1      | -0.042803091 | 6.970584169 | 0.460861278 |
| LOC651635 | 0.016446564  | 6.14798077  | 0.460868176 |
| LOC651186 | 0.02471767   | 6.095107461 | 0.460907686 |
| FAM83H    | -0.021555673 | 6.24278788  | 0.460913832 |
| HORMAD1   | 0.011911058  | 6.028013046 | 0.46097879  |
| PPIE      | -0.023632292 | 7.79147107  | 0.461136962 |
| LOC644504 | 0.01721247   | 6.023560558 | 0.461142811 |
| C11ORF61  | 0.017682555  | 6.679496407 | 0.461267194 |
| ZFP14     | 0.026386843  | 6.255807216 | 0.461285104 |
| KCND1     | -0.025990168 | 6.135462347 | 0.461324822 |
| ARHGAP20  | 0.021917871  | 6.077379061 | 0.461447639 |
| IMAA      | -0.055348621 | 13.07178259 | 0.461476633 |
| TREML4    | -0.019175473 | 6.098883564 | 0.46154821  |
| GD11      | 0.036379182  | 8.646473225 | 0.461703434 |
| UBR7      | 0.026901339  | 7.624419583 | 0.461762477 |
| RPS3A     | 0.049246869  | 12.5614705  | 0.461789481 |
| MEF2B     | 0.016672546  | 6.290197563 | 0.461862702 |
| CLINT1    | 0.035091069  | 9.359461685 | 0.461955623 |
| LOC648394 | 0.018365882  | 6.304760727 | 0.46197113  |
| RIG       | 0.016587005  | 5.986166611 | 0.461997358 |
| EXOC3L2   | 0.017766623  | 6.023669166 | 0.462109807 |
| INTS3     | 0.033149823  | 8.917836077 | 0.462125508 |
| LOC647869 | 0.01714153   | 5.993454299 | 0.462253009 |
| LOC653105 | 0.011867562  | 6.071149077 | 0.462264388 |
| LOC646448 | 0.019087868  | 6.077785076 | 0.462322216 |
| LOC649768 | 0.016541935  | 6.250661728 | 0.462324546 |
| LOC283551 | 0.017876073  | 5.973260124 | 0.462362493 |
| LOC389316 | 0.016945706  | 5.984674751 | 0.462414972 |
| LOC441376 | -0.017439449 | 5.966634071 | 0.462470371 |
| LOC731159 | -0.019048031 | 5.932547339 | 0.462518105 |
| LOC645444 | -0.016359548 | 6.091694343 | 0.462812121 |
| WDR38     | 0.013760442  | 6.279459015 | 0.4629121   |
| ZBED2     | -0.018808164 | 5.95681256  | 0.463102405 |
| LOC643461 | -0.020869248 | 6.216217019 | 0.463148962 |
| ZNF692    | -0.023184651 | 7.199378772 | 0.463214376 |
| LOC652082 | -0.018573609 | 6.348867267 | 0.463372285 |
| MYO1A     | 0.018221853  | 6.422305842 | 0.46369093  |
| PRSSL1    | -0.019305563 | 5.986818414 | 0.46373147  |
| RDH11     | -0.026966129 | 8.760304213 | 0.463816283 |
| LOC649374 | -0.01641644  | 6.114987669 | 0.463836439 |
| LOC645635 | 0.018317358  | 6.093212655 | 0.463856956 |
| LOC653515 | -0.017530802 | 6.096169371 | 0.463861981 |
| NTNG1     | 0.013728186  | 6.012337558 | 0.463956114 |
| LOC645755 | -0.020994878 | 5.965385829 | 0.463977159 |
| PGK2      | -0.012928597 | 5.979520734 | 0.464048626 |
| LOC652801 | 0.017055036  | 6.041100056 | 0.464089146 |
| ADAM19    | -0.077069563 | 8.500696874 | 0.464235857 |
| LOC342346 | 0.018011011  | 6.334501807 | 0.464373941 |
| SERPINB9  | -0.015361717 | 6.131074211 | 0.464394612 |
| RASEF     | 0.019899815  | 6.042559196 | 0.464399779 |
| NPC1L1    | 0.020774071  | 6.165861228 | 0.46445796  |

## DEG.infomation

|           |              |             |             |
|-----------|--------------|-------------|-------------|
| FGF20     | -0.013616841 | 6.138447029 | 0.464466074 |
| LOC644993 | -0.016249264 | 6.092993407 | 0.464527805 |
| LOC730713 | 0.013047512  | 5.988512546 | 0.464530022 |
| HOXB13    | -0.018479173 | 5.96632801  | 0.464563221 |
| LOC648735 | -0.018452343 | 6.025785638 | 0.464715664 |
| LOC730704 | 0.021159044  | 6.167417819 | 0.464779832 |
| SLC10A5   | 0.017839902  | 5.981594742 | 0.464802149 |
| VPS4A     | -0.028212183 | 7.937808579 | 0.46486237  |
| OVGP1     | -0.025767588 | 7.178039769 | 0.46490215  |
| LOC375323 | -0.017235022 | 6.128196678 | 0.46490776  |
| ALDH3A1   | 0.024901121  | 6.016624327 | 0.465048647 |
| LOC653257 | -0.014641151 | 6.097838266 | 0.465230481 |
| LOC642480 | 0.02108246   | 5.959356765 | 0.465322657 |
| LOC346950 | 0.050070622  | 7.192879897 | 0.465427774 |
| LOC650253 | -0.028113872 | 6.072916561 | 0.465430209 |
| LOC647323 | 0.017821276  | 6.070938265 | 0.465445435 |
| LOC653492 | 0.017260545  | 6.04101442  | 0.465489578 |
| DEFB110   | -0.017055814 | 6.047798556 | 0.465494846 |
| NUP214    | 0.032993602  | 8.07254787  | 0.465494927 |
| LOC648998 | 0.016322416  | 6.050034509 | 0.465517861 |
| HELT      | 0.01781139   | 6.035614293 | 0.465553374 |
| TTC36     | -0.017540915 | 6.106460396 | 0.465753201 |
| OR2T4     | 0.020920344  | 5.957408587 | 0.465762489 |
| LAMA1     | -0.010616513 | 6.11877404  | 0.465796361 |
| LOC652067 | 0.021100602  | 6.129663852 | 0.465879156 |
| C16ORF71  | -0.018373015 | 6.039708392 | 0.466002797 |
| LOC642736 | 0.018001732  | 6.061146737 | 0.466149507 |
| ELA3A     | -0.012414181 | 6.033722081 | 0.466157262 |
| NUDT19    | 0.019147859  | 6.338641381 | 0.466166168 |
| ATXN7L2   | -0.024176381 | 6.629002442 | 0.466257563 |
| LOC440944 | 0.020209864  | 5.960181332 | 0.466294527 |
| HNRPA2B1  | 0.030079295  | 11.67990576 | 0.466363951 |
| LOC652495 | -0.018446784 | 6.027212663 | 0.466463146 |
| NLRP13    | 0.016589754  | 5.995895965 | 0.466493509 |
| MGC15634  | 0.021477026  | 6.331402585 | 0.466552698 |
| SERPINB12 | -0.018983992 | 5.883734772 | 0.466563271 |
| ADAMTS6   | 0.021667854  | 6.255052583 | 0.466589667 |
| LOC642093 | 0.018971728  | 5.977398754 | 0.46668114  |
| CRYGC     | -0.017677674 | 5.990023615 | 0.466716051 |
| WDR90     | 0.017281585  | 6.304192203 | 0.466785719 |
| LOC392559 | 0.019277128  | 6.012615553 | 0.466892778 |
| LOC649886 | 0.017872601  | 6.199188506 | 0.466898876 |
| FLJ16165  | 0.020012782  | 6.093024448 | 0.466918694 |
| LOC642216 | 0.017184022  | 6.019654451 | 0.467021685 |
| LOC649383 | -0.017791442 | 6.123113892 | 0.467030158 |
| MYH1      | -0.011450398 | 6.042212874 | 0.467077836 |
| ZNF238    | -0.012395157 | 6.206435271 | 0.467102419 |
| LOC730344 | -0.016053906 | 6.047249806 | 0.467113388 |
| KRTAP8-1  | -0.017310533 | 6.030137876 | 0.467307648 |
| TMPRSS4   | -0.01679543  | 6.182674261 | 0.467517047 |
| TXNDC11   | -0.027926803 | 7.356274722 | 0.467697646 |

## DEG.infomation

|           |              |             |             |
|-----------|--------------|-------------|-------------|
| LOC441344 | 0.015293248  | 5.965271293 | 0.467766483 |
| LOC646365 | 0.020938794  | 6.095453144 | 0.467766653 |
| OR8I2     | -0.022687907 | 5.930183184 | 0.467820784 |
| NUBPL     | 0.044443133  | 10.38753394 | 0.467846887 |
| LOC653314 | -0.027881735 | 12.34791331 | 0.467877677 |
| LOC647741 | -0.020415391 | 6.29361507  | 0.467882039 |
| FBXO17    | 0.012051577  | 6.129564869 | 0.468032174 |
| FLJ43870  | 0.019765377  | 6.034468483 | 0.468143772 |
| FAM76A    | 0.032998934  | 6.557929483 | 0.468176715 |
| PRAMEF17  | -0.017366371 | 6.161641181 | 0.46820571  |
| PON3      | 0.025986484  | 6.601092235 | 0.468241084 |
| CART1     | 0.020001127  | 5.895490957 | 0.468385499 |
| ZFP95     | 0.027370941  | 5.989849188 | 0.468415939 |
| LOC150786 | 0.018438174  | 5.926329949 | 0.468473116 |
| LOC642514 | 0.020004023  | 6.167132476 | 0.46849636  |
| TECTB     | -0.019755878 | 5.965873576 | 0.468519508 |
| FAM89B    | 0.03244298   | 8.634340196 | 0.468579653 |
| C2ORF61   | 0.023739343  | 5.957179904 | 0.468641771 |
| KIAA0492  | -0.025579457 | 6.407198914 | 0.468646331 |
| DNHD1     | 0.022542118  | 6.568644788 | 0.468667472 |
| LOC645818 | -0.018192293 | 6.042556632 | 0.468672851 |
| LOC654203 | -0.0168564   | 6.203162957 | 0.46867903  |
| C5ORF32   | -0.045058821 | 9.63303581  | 0.468809216 |
| FLJ33651  | 0.018400075  | 6.025436442 | 0.468828667 |
| KIR2DS5   | 0.017281464  | 6.066934574 | 0.468867582 |
| LOC646458 | -0.018465324 | 6.097850272 | 0.468917727 |
| LOC642450 | -0.016245594 | 6.098679759 | 0.468968008 |
| HGF       | -0.01287214  | 6.092999278 | 0.469086795 |
| C4A       | -0.024710833 | 6.083603357 | 0.469269113 |
| SPAG5     | 0.017102717  | 6.29977893  | 0.469276678 |
| SGCD      | 0.042658498  | 7.758498814 | 0.469286138 |
| VPS54     | 0.016911256  | 6.728965545 | 0.469378629 |
| TARSL2    | -0.034680988 | 7.222900679 | 0.469392789 |
| LOC253820 | -0.019013849 | 6.005238488 | 0.469523937 |
| SERPINB11 | -0.017040176 | 6.169241788 | 0.469584241 |
| CPNE2     | 0.020880989  | 6.297804965 | 0.469625938 |
| PLEK2     | -0.018556701 | 6.118674199 | 0.469794531 |
| PLA2G12B  | -0.019272587 | 6.268942389 | 0.469863624 |
| C2ORF53   | 0.016995962  | 6.17472416  | 0.469978324 |
| SPATA6    | -0.01590612  | 6.257597217 | 0.470021457 |
| MYF5      | 0.013898718  | 6.154843955 | 0.470191534 |
| ARPP-21   | -0.010683971 | 6.014301252 | 0.470223607 |
| ABCD1     | 0.03027608   | 6.916327116 | 0.470252668 |
| LOC649041 | 0.020475493  | 6.023740496 | 0.470287418 |
| ZNF766    | 0.036356904  | 6.21671382  | 0.47044875  |
| SF11      | -0.011521706 | 6.14991096  | 0.470524227 |
| HLA-DQA2  | -0.016966143 | 6.211188033 | 0.470559676 |
| LOC644171 | -0.014945412 | 5.971112362 | 0.470716782 |
| LZTS2     | 0.0210176    | 7.050489763 | 0.47077436  |
| C17ORF57  | -0.017441273 | 6.085392696 | 0.470838009 |
| LOC338579 | -0.011335691 | 6.04762799  | 0.470845845 |

## DEG.infomation

|           |              |             |             |
|-----------|--------------|-------------|-------------|
| LOC643283 | -0.01792175  | 6.016091753 | 0.470948188 |
| LOC286016 | -0.041002573 | 9.739336178 | 0.471082886 |
| NEU3      | 0.029817809  | 6.078811468 | 0.471254639 |
| SH3BGRL2  | -0.036588705 | 7.872252105 | 0.471348068 |
| LOC644898 | 0.026422229  | 6.131345112 | 0.471461929 |
| ASNSD1    | 0.039158681  | 9.759822104 | 0.471496012 |
| CMTM2     | -0.019810668 | 5.933337941 | 0.471547863 |
| C7ORF29   | 0.019679762  | 6.520835105 | 0.471735643 |
| ABCA7     | -0.014301217 | 6.134894323 | 0.471784273 |
| STIM2     | 0.035318494  | 6.674951014 | 0.471811776 |
| FAM120C   | 0.022343285  | 6.071916388 | 0.472016283 |
| MAP3K9    | -0.027487065 | 6.088392758 | 0.472099564 |
| PLCB1     | 0.031282953  | 6.779040767 | 0.472132825 |
| CST1      | 0.02546876   | 6.083958464 | 0.472141716 |
| LOC652071 | -0.037240435 | 13.03108182 | 0.472263792 |
| LOC400708 | -0.021304528 | 6.192995066 | 0.472485843 |
| ZCCHC2    | 0.017841583  | 6.005448365 | 0.472651066 |
| FGFR2     | 0.020039718  | 6.049816098 | 0.472713036 |
| MGC34761  | 0.01869432   | 6.237510576 | 0.472806258 |
| LOC646183 | -0.018905783 | 5.947944242 | 0.472907211 |
| WIPF3     | 0.017959694  | 6.01127102  | 0.473048694 |
| LOC648447 | -0.017568688 | 5.964482903 | 0.473095534 |
| LOC649754 | 0.013545307  | 6.537587449 | 0.473112066 |
| LOC642280 | -0.013867193 | 6.010185829 | 0.473114677 |
| LOC649296 | -0.02010131  | 6.079299791 | 0.473141674 |
| DYDC1     | -0.012784442 | 5.972983537 | 0.473258329 |
| MAGEB3    | 0.029732825  | 6.111786932 | 0.473362638 |
| ASB17     | 0.013235817  | 6.072355284 | 0.473379203 |
| OR5M8     | 0.013244853  | 5.98330008  | 0.473414631 |
| LOC644429 | 0.017910509  | 6.063364788 | 0.47346483  |
| MGAM      | -0.014200893 | 5.978573755 | 0.473545884 |
| LOC652433 | 0.016039319  | 6.010378089 | 0.473555434 |
| LOC730920 | -0.019063256 | 6.523501434 | 0.473562739 |
| OR5M9     | -0.017358327 | 6.044909924 | 0.473564256 |
| KIF24     | -0.01690624  | 6.150614783 | 0.473579755 |
| MYBPC3    | -0.049680625 | 14.3174638  | 0.47362236  |
| FLJ42102  | -0.01826257  | 5.89416571  | 0.473777471 |
| PSORS1C2  | -0.016343291 | 6.094213441 | 0.473780925 |
| LOC646869 | 0.017239485  | 6.247016546 | 0.473851162 |
| LOC391475 | 0.020104679  | 6.360011751 | 0.473871764 |
| FLJ42289  | 0.018535016  | 5.991556232 | 0.473889481 |
| PIB5PA    | -0.050740618 | 7.972428605 | 0.474058351 |
| HS3ST5    | 0.021942003  | 6.009465126 | 0.474123254 |
| LOC651729 | -0.02223817  | 6.13396044  | 0.474187506 |
| RXRG      | 0.016621414  | 6.272396918 | 0.474248332 |
| LOC643363 | 0.018720085  | 6.005755878 | 0.474270314 |
| WHDC1     | -0.026590122 | 6.596668102 | 0.474359511 |
| LOC649702 | -0.021984226 | 6.07696539  | 0.474369122 |
| LOC652698 | 0.025449333  | 6.388877178 | 0.474427353 |
| BLR1      | -0.020346487 | 5.953694594 | 0.474454219 |
| LOC133609 | -0.014578045 | 6.031682121 | 0.474542469 |

## DEG.infomation

|           |              |             |             |
|-----------|--------------|-------------|-------------|
| LOC441931 | -0.018756748 | 6.112460917 | 0.474618528 |
| CNTFR     | -0.01442744  | 6.161078997 | 0.474757669 |
| DEFB126   | -0.016002295 | 5.893644467 | 0.474861581 |
| KRTAP6-3  | -0.016670234 | 5.995069608 | 0.475077871 |
| LOC642219 | 0.02671832   | 5.914661219 | 0.475106754 |
| LOC642962 | -0.018312441 | 6.150403116 | 0.475130686 |
| LOC642133 | 0.016397983  | 6.075647749 | 0.475193276 |
| DNAJB7    | -0.017290109 | 6.01300205  | 0.475260429 |
| LOC646280 | -0.020553338 | 6.072360259 | 0.475298228 |
| INDOL1    | -0.020977112 | 6.326589716 | 0.475333828 |
| PKDREJ    | 0.023630949  | 6.055125041 | 0.475389266 |
| DDX53     | -0.017518996 | 6.067231912 | 0.475396533 |
| KCNE3     | 0.020338339  | 5.984859441 | 0.47539929  |
| LOC652548 | 0.019432556  | 5.902826685 | 0.47549704  |
| LOC127011 | -0.022597206 | 5.953033351 | 0.475555425 |
| LOC650861 | 0.019990858  | 5.962398217 | 0.475634656 |
| C1ORF108  | -0.022731521 | 6.108624069 | 0.475675643 |
| SMNDC1    | 0.051053574  | 8.368087688 | 0.475712741 |
| RBM6      | 0.033658736  | 8.424800828 | 0.475756598 |
| LOC653381 | -0.042747962 | 9.148027704 | 0.475853331 |
| LOC644681 | 0.019650874  | 6.16930677  | 0.475922019 |
| ADORA1    | -0.039047122 | 6.712798415 | 0.475932013 |
| LOC653752 | -0.031939647 | 6.929551341 | 0.476014119 |
| LOC645929 | 0.01961859   | 5.922577817 | 0.476098853 |
| LOC441812 | 0.018509092  | 5.927504368 | 0.4762936   |
| GPR153    | 0.018934026  | 6.344432018 | 0.4763377   |
| LOC648972 | -0.016971308 | 6.105167918 | 0.476420426 |
| CAPZA3    | 0.018612629  | 5.997649558 | 0.476447859 |
| IVL       | 0.029933027  | 6.028483472 | 0.476453976 |
| LOC339809 | -0.020755781 | 6.147542617 | 0.476508124 |
| POU3F3    | 0.021259027  | 5.93880188  | 0.476576565 |
| SUMO4     | 0.01881396   | 6.115144583 | 0.476583122 |
| CLPB      | -0.017782934 | 6.171709088 | 0.476606531 |
| SAA4      | 0.02052532   | 5.972042081 | 0.476656939 |
| C9ORF53   | 0.016997831  | 6.060552872 | 0.476758404 |
| NMS       | 0.015876294  | 6.064361646 | 0.476765031 |
| TMCO5A    | 0.029742876  | 6.001870497 | 0.476877429 |
| LOC649360 | 0.02052387   | 5.822881949 | 0.476900889 |
| LOC728334 | 0.017244295  | 5.999464229 | 0.476937232 |
| CRYBA2    | 0.014070329  | 6.133654245 | 0.47701071  |
| FLJ90231  | 0.01200313   | 6.019420947 | 0.4770925   |
| LOC652353 | 0.01639808   | 6.108670875 | 0.477100772 |
| LOC648704 | -0.023786291 | 6.080987156 | 0.477135731 |
| GDF5      | 0.017887097  | 6.045905684 | 0.4771797   |
| LOC391817 | 0.019356372  | 6.215939351 | 0.47727502  |
| LOC652905 | 0.017232569  | 6.182079012 | 0.477349059 |
| LOC730034 | 0.021551642  | 6.053697617 | 0.477376343 |
| CCDC11    | -0.018243584 | 6.06922     | 0.477380699 |
| SLC25A21  | 0.017113879  | 5.999148064 | 0.477404617 |
| KRT39     | -0.012106674 | 5.980969055 | 0.477433218 |
| GHRHR     | 0.014622891  | 5.92745357  | 0.477439376 |

## DEG.infomation

|           |              |             |             |
|-----------|--------------|-------------|-------------|
| LOC647681 | 0.016048994  | 6.118759493 | 0.477593427 |
| LOC646498 | -0.012234734 | 6.106932361 | 0.477833117 |
| GNAS      | 0.027135234  | 12.10058629 | 0.477904115 |
| CYP7A1    | 0.015821853  | 5.993383499 | 0.477933967 |
| ASPRV1    | 0.018908642  | 6.26151316  | 0.477971867 |
| TMEM5     | 0.044183043  | 10.12701063 | 0.478110095 |
| FLJ25758  | -0.018305905 | 6.045764833 | 0.478224447 |
| GLYBP     | -0.018530738 | 6.14240687  | 0.478339541 |
| LOC648657 | -0.017856547 | 6.13928726  | 0.478363514 |
| ZC3H5     | -0.039513068 | 7.673112199 | 0.478440607 |
| LOC646990 | -0.018326394 | 6.438318759 | 0.478651904 |
| PYCRL     | -0.020235544 | 6.016841461 | 0.478726223 |
| C2ORF54   | 0.017957393  | 5.983332214 | 0.478736526 |
| LOC649174 | 0.017872776  | 6.227721959 | 0.478794289 |
| HUS1      | 0.014203725  | 5.993085277 | 0.478893081 |
| LOC730809 | -0.017508034 | 5.990634503 | 0.478913207 |
| FLJ33387  | -0.018452632 | 6.075340102 | 0.478957079 |
| ALAD      | 0.045028951  | 7.806562636 | 0.479101429 |
| LOC647003 | -0.017211158 | 6.10530161  | 0.479136994 |
| LOC650373 | 0.015264809  | 6.068203107 | 0.479146005 |
| LOC400768 | 0.019020037  | 6.14684042  | 0.479171486 |
| BCAS1     | -0.014004807 | 5.962740928 | 0.479282202 |
| ABCA9     | -0.041647242 | 7.104690111 | 0.479402145 |
| LOC646363 | 0.018774911  | 6.07010015  | 0.479425065 |
| LOC652213 | 0.019847174  | 6.105385372 | 0.479444547 |
| RAG1      | 0.017760659  | 6.104397552 | 0.479462164 |
| ADRBK1    | 0.020951098  | 5.96072925  | 0.479498228 |
| LOC649853 | -0.019831253 | 6.130044924 | 0.479503189 |
| FAM105A   | -0.03500048  | 6.138578755 | 0.479618247 |
| C6ORF26   | 0.016820375  | 6.159018212 | 0.479689768 |
| PHACTR2   | 0.046328358  | 8.702541547 | 0.479712478 |
| LOC730132 | -0.016226995 | 6.152660886 | 0.479738971 |
| CHPF      | 0.048927368  | 8.676820352 | 0.479927886 |
| FLJ14816  | -0.018397792 | 5.978138986 | 0.48012059  |
| LOC649580 | -0.018777106 | 6.473578309 | 0.480126411 |
| LOC647197 | 0.017299333  | 6.076092647 | 0.480267561 |
| SCN8A     | -0.018871227 | 5.916295332 | 0.48038398  |
| LOC653118 | 0.016366892  | 6.07022478  | 0.480445307 |
| FBXW12    | 0.018083597  | 5.977851585 | 0.480451843 |
| UBE3A     | -0.025600319 | 9.634967788 | 0.48054837  |
| LOC652608 | 0.026475196  | 6.262708699 | 0.480573555 |
| LOC646173 | 0.01819593   | 5.984478102 | 0.480593626 |
| EREG      | -0.018568115 | 6.219337808 | 0.480614367 |
| UTS2      | -0.009614023 | 6.003200203 | 0.48061587  |
| GLIS1     | 0.017463038  | 6.031434054 | 0.480671932 |
| LOC642597 | 0.014849348  | 6.049234095 | 0.480706414 |
| IFT80     | -0.015719529 | 6.018525125 | 0.480802399 |
| FDX1      | 0.028535496  | 7.114509254 | 0.480901937 |
| LOC646401 | 0.017048092  | 6.048721    | 0.48095423  |
| GALNT7    | 0.016378515  | 5.905641523 | 0.481052629 |
| LOC440248 | 0.018198424  | 6.220343577 | 0.481064805 |

## DEG.infomation

|            |              |             |             |
|------------|--------------|-------------|-------------|
| PCYT1A     | -0.01870931  | 6.196824001 | 0.481084835 |
| LOC728044  | 0.016931904  | 6.031464396 | 0.481102693 |
| KRTAP1-3   | 0.017835416  | 6.040725    | 0.481114542 |
| FAU        | -0.030080905 | 12.75523713 | 0.481158013 |
| LOC652599  | 0.017174039  | 6.09435665  | 0.481185808 |
| PJA2       | 0.05482632   | 11.21206697 | 0.481254608 |
| URG4       | -0.023983595 | 7.937767223 | 0.481259434 |
| HTR3E      | 0.017470599  | 6.036508944 | 0.481348331 |
| SURF6      | -0.033006605 | 8.605221732 | 0.48143925  |
| LOC650392  | -0.016790135 | 5.977420825 | 0.481514373 |
| OR2M3      | -0.013790465 | 6.092724991 | 0.481528337 |
| COX6A1     | 0.04746192   | 9.870755207 | 0.481533521 |
| CALU       | -0.054787279 | 10.17109975 | 0.481557294 |
| LOC641852  | 0.019449309  | 6.103334428 | 0.481640089 |
| FLJ42709   | -0.018463577 | 6.055753119 | 0.481795623 |
| C1ORF32    | -0.020593719 | 6.151652744 | 0.481967366 |
| OR5A1      | 0.018626049  | 6.009127419 | 0.481993861 |
| LOC644091  | 0.022309348  | 6.103746524 | 0.48204773  |
| ST6GALNAC2 | -0.031989249 | 6.216549309 | 0.482165507 |
| C11ORF58   | 0.037577661  | 6.55736719  | 0.482318366 |
| KIAA0527   | 0.012253624  | 5.974878072 | 0.482351763 |
| LPIN3      | -0.020216283 | 6.391121336 | 0.482448092 |
| SI         | 0.014731612  | 6.074113229 | 0.482467361 |
| C22ORF34   | 0.018912305  | 6.050999614 | 0.482478537 |
| NFXL1      | 0.026063097  | 7.005761914 | 0.482484492 |
| PTPRJ      | -0.017636368 | 6.190765419 | 0.482683401 |
| SPANXE     | 0.012141276  | 6.043525476 | 0.482739542 |
| LOC155100  | -0.015659975 | 6.12340528  | 0.482858864 |
| AMELY      | -0.016509805 | 6.167013001 | 0.48305518  |
| RRP15      | -0.044209031 | 8.861697152 | 0.48323816  |
| C6ORF118   | -0.016056355 | 6.002705895 | 0.483314326 |
| LOC653052  | -0.019216217 | 6.089842264 | 0.483622869 |
| MAP1D      | 0.02954182   | 6.15818565  | 0.483636521 |
| LOC645489  | 0.035942971  | 8.055947387 | 0.483651021 |
| MYH11      | 0.083938406  | 9.745801575 | 0.483780107 |
| LOC649406  | 0.015256808  | 5.982442093 | 0.483813317 |
| LOC650144  | 0.027980825  | 6.016497521 | 0.483958384 |
| C21ORF41   | 0.009174376  | 6.042998413 | 0.48400254  |
| LOC651467  | 0.015005453  | 6.001169507 | 0.484174743 |
| ETNK1      | -0.015178591 | 6.450384034 | 0.484252054 |
| HSPCAL3    | -0.021382483 | 6.097494309 | 0.484425819 |
| LOC164380  | 0.016916792  | 5.865845531 | 0.484493607 |
| LOC401131  | 0.018858025  | 6.010893519 | 0.484553287 |
| DTL        | -0.020541779 | 6.118114862 | 0.48458259  |
| ATP10B     | -0.018411149 | 6.113204019 | 0.484617294 |
| LOC650436  | 0.019906154  | 5.828695641 | 0.484630639 |
| PRDM1      | 0.019082939  | 6.367646412 | 0.484701827 |
| LOC642769  | 0.018815733  | 6.180717323 | 0.484755232 |
| PRCP       | -0.028415164 | 10.56880629 | 0.48482966  |
| MAP3K3     | -0.028156054 | 7.080663337 | 0.484925138 |
| PDIA3      | -0.023674167 | 6.053047952 | 0.484962347 |



## DEG.infomation

|           |              |             |             |
|-----------|--------------|-------------|-------------|
| GUSBL1    | -0.031152972 | 7.51513452  | 0.484993666 |
| OR6C2     | 0.018445194  | 5.914625739 | 0.485033068 |
| DACH1     | -0.03233768  | 6.666025723 | 0.485136066 |
| TMEM32    | -0.033132154 | 9.531110259 | 0.485202414 |
| LOC729335 | 0.013602638  | 6.103098541 | 0.485235738 |
| LOC651957 | 0.019009598  | 6.115436793 | 0.48533246  |
| LOC645396 | -0.017025153 | 5.997542282 | 0.485454368 |
| ITGAD     | 0.022479031  | 6.019065561 | 0.485455131 |
| SFRS6     | 0.033993009  | 10.87132486 | 0.485459212 |
| SLC22A2   | 0.012784651  | 6.012413171 | 0.485466158 |
| LOC652701 | 0.019747541  | 5.998305305 | 0.485476788 |
| LOC643684 | -0.014140032 | 6.057415828 | 0.485491435 |
| WDR36     | 0.028037514  | 7.974301323 | 0.485560194 |
| SERPINA9  | 0.01385738   | 6.076102127 | 0.485568078 |
| SF3A2     | -0.030674025 | 8.426051279 | 0.485593708 |
| ACTA2     | -0.075421392 | 12.14685093 | 0.485673521 |
| CHRN2     | -0.020688316 | 5.932411338 | 0.485724826 |
| SLC25A35  | 0.018107497  | 6.246229684 | 0.48573251  |
| DNAH5     | -0.019133961 | 6.187194568 | 0.485796898 |
| LOC652703 | 0.018822651  | 6.119766521 | 0.48588534  |
| CHAD      | 0.016191103  | 6.126359697 | 0.48592553  |
| DGCR8     | -0.040457147 | 7.526731591 | 0.485931271 |
| AMBRA1    | 0.022255134  | 6.193425755 | 0.486002729 |
| C14ORF156 | -0.03221337  | 12.6051945  | 0.486007999 |
| LOC648527 | 0.015244252  | 5.950937762 | 0.486052082 |
| SPO11     | -0.011024344 | 6.17006285  | 0.486159137 |
| LOC151121 | -0.01926657  | 6.20585374  | 0.486237239 |
| BPY2B     | 0.01754563   | 6.098274629 | 0.486277114 |
| PTK6      | 0.015365124  | 6.410679417 | 0.486307613 |
| LOC728094 | -0.018463748 | 6.019267986 | 0.486524078 |
| RAB10     | -0.027634321 | 10.94365292 | 0.486553688 |
| C6ORF94   | 0.016511683  | 5.945021357 | 0.486601027 |
| LOC340511 | 0.018346957  | 6.062247361 | 0.486705034 |
| FLJ36032  | 0.016309756  | 6.02686823  | 0.486819263 |
| OR5D18    | -0.014198539 | 6.020392455 | 0.486869317 |
| SLC17A5   | -0.018917084 | 6.19113645  | 0.486889023 |
| CEPT1     | -0.018853414 | 7.472900322 | 0.486948396 |
| DPP8      | 0.020740176  | 7.317820921 | 0.486965841 |
| PSPN      | -0.018218534 | 5.943391593 | 0.487093166 |
| GRM2      | -0.023220936 | 6.580642138 | 0.487099992 |
| OR6C74    | 0.018326094  | 5.98509245  | 0.487169445 |
| B3GAT2    | 0.016035941  | 5.993542774 | 0.487240631 |
| STMN4     | -0.01654662  | 5.981494136 | 0.487319553 |
| TREM2     | -0.018288234 | 6.138245529 | 0.48732206  |
| KRTAP13-1 | -0.014015272 | 6.13152666  | 0.487409913 |
| MAP3K2    | 0.018664635  | 6.56936373  | 0.487621052 |
| C14ORF23  | 0.018386377  | 6.00950258  | 0.487664054 |
| SERF1A    | -0.016678408 | 6.287727181 | 0.487740243 |
| FRMD1     | -0.019133496 | 5.919560012 | 0.48783688  |
| VPS26     | 0.051539131  | 7.173416943 | 0.487841304 |
| FAM45B    | 0.018055479  | 6.231728101 | 0.487904866 |

## DEG.infomation

|               |              |             |             |
|---------------|--------------|-------------|-------------|
| DUPD1         | 0.016624024  | 6.03048013  | 0.487929882 |
| RXFP4         | -0.018277045 | 6.06363161  | 0.487930721 |
| LOC732275     | 0.01779484   | 5.999769698 | 0.488083583 |
| C4ORF45       | 0.016096385  | 6.087733782 | 0.488101854 |
| ACO2          | 0.047988217  | 11.2609856  | 0.488133432 |
| DTX4          | 0.018292912  | 6.005478831 | 0.488150928 |
| EXOSC5        | -0.032077134 | 7.861252517 | 0.488214304 |
| CDK5RAP1      | 0.019681173  | 7.983596494 | 0.48826422  |
| TNP1          | -0.017340379 | 6.223214221 | 0.48834188  |
| ZNF80         | 0.017633406  | 6.268034441 | 0.488424855 |
| ZG16          | -0.015220331 | 6.023772032 | 0.488472868 |
| LOC649447     | 0.034326757  | 11.44847376 | 0.488501653 |
| LOC650657     | -0.019170796 | 6.148366352 | 0.488530874 |
| DKFZP686D0972 | 0.020756893  | 5.85270253  | 0.488648076 |
| C21ORF88      | 0.020069327  | 6.140828496 | 0.488651482 |
| STON1         | 0.030691727  | 6.635313322 | 0.488697785 |
| SNX26         | 0.029467866  | 7.540815092 | 0.488702677 |
| C6ORF185      | -0.017820007 | 5.969234018 | 0.488746448 |
| LOC641738     | 0.014946094  | 5.971762255 | 0.488754041 |
| LOC389300     | 0.015812622  | 6.05838092  | 0.488771337 |
| LDLRAD2       | -0.019380805 | 6.131758997 | 0.489084977 |
| SNHG3         | 0.018316712  | 6.107030192 | 0.489095054 |
| LOC255275     | 0.016130016  | 6.047469428 | 0.489135317 |
| C6ORF61       | 0.024293308  | 6.505866438 | 0.48933019  |
| ACOT6         | 0.016470479  | 5.949238986 | 0.489393875 |
| FAM124B       | 0.051500473  | 7.048010713 | 0.489418169 |
| TSPAN14       | -0.044499712 | 6.516468035 | 0.489576035 |
| PEX5L         | 0.012909808  | 6.075686754 | 0.489582064 |
| B4GALNT4      | -0.02180102  | 5.858466819 | 0.489743932 |
| LOC440309     | 0.01948102   | 6.108341511 | 0.489924844 |
| HHLA1         | 0.019284252  | 6.156428194 | 0.489944818 |
| LOC645690     | 0.015557972  | 6.073287161 | 0.489948427 |
| EPHA6         | -0.007676336 | 6.06359737  | 0.48995216  |
| LOC440421     | 0.018132067  | 6.211780425 | 0.489989776 |
| IL13RA2       | -0.025128277 | 6.023616054 | 0.489989832 |
| TUBGCP3       | -0.019034564 | 6.144115034 | 0.48999092  |
| APOA5         | -0.021036453 | 6.007956401 | 0.490057363 |
| SPANXN2       | 0.021862234  | 5.891131421 | 0.490093367 |
| LOC90925      | 0.016333553  | 6.088960171 | 0.490108881 |
| OR7G1         | -0.020300873 | 6.092072786 | 0.490280614 |
| GPR26         | -0.024556224 | 6.051598594 | 0.490286464 |
| BMP8A         | -0.015746617 | 5.994190616 | 0.490392434 |
| LOC645401     | -0.019988401 | 6.259720371 | 0.490398125 |
| PDCD1LG2      | -0.019887722 | 5.84181398  | 0.490448545 |
| LOC644088     | 0.014980626  | 6.068452719 | 0.490483015 |
| SHARPIN       | -0.046289325 | 6.833090876 | 0.490663189 |
| MAB21L2       | 0.014214906  | 6.126253279 | 0.490785107 |
| LOC284215     | 0.016904455  | 6.034722008 | 0.490818785 |
| KRT81         | 0.024137397  | 6.143438629 | 0.490896112 |
| LOC652416     | 0.019727044  | 6.045655551 | 0.490926251 |
| C16ORF89      | -0.031853311 | 6.077222656 | 0.490955831 |

## DEG.infomation

|           |              |             |             |
|-----------|--------------|-------------|-------------|
| DEFB128   | -0.019294957 | 6.135724166 | 0.491020693 |
| RNF113B   | -0.016593398 | 6.318607795 | 0.491056939 |
| DUX3      | -0.017777747 | 6.163970808 | 0.491075287 |
| LOC651345 | 0.00907066   | 6.019931474 | 0.491120326 |
| LHX5      | 0.019667943  | 6.191667897 | 0.491195774 |
| OR10A6    | 0.017430609  | 6.054035195 | 0.491196888 |
| FLJ35946  | 0.019086552  | 5.893113447 | 0.491310635 |
| PCDHB12   | -0.020376715 | 6.309605801 | 0.491314531 |
| LOC649341 | -0.014587278 | 6.047059487 | 0.49133894  |
| NAALADL2  | 0.018434636  | 6.145808067 | 0.49138638  |
| HTATSF1   | -0.017964321 | 5.949848457 | 0.491391845 |
| C6ORF68   | 0.016472241  | 6.039645117 | 0.491394571 |
| PALM2     | 0.020169924  | 6.23884243  | 0.491405305 |
| KCTD2     | -0.027167873 | 6.784730341 | 0.491435097 |
| PTAFR     | -0.027203073 | 6.185880393 | 0.491460947 |
| PPP2R5B   | 0.026227861  | 7.293535277 | 0.491546332 |
| PCDHGB7   | -0.012456716 | 5.980166797 | 0.491579975 |
| FAM90A8   | 0.017416327  | 6.032850321 | 0.49164051  |
| LOC651675 | -0.01675383  | 5.977939416 | 0.491799202 |
| HIST1H3A  | 0.017647957  | 6.426545078 | 0.491815782 |
| KRTAP5-10 | 0.017919045  | 5.98794791  | 0.491915853 |
| LOC644014 | -0.022750901 | 5.887908831 | 0.491984571 |
| CEACAM5   | 0.017649681  | 6.0968727   | 0.491986716 |
| PCDHGA5   | 0.01222474   | 6.115626993 | 0.492044499 |
| PAX3      | -0.011344555 | 5.960644486 | 0.492104859 |
| SLIT1     | 0.016458251  | 6.034273058 | 0.492119306 |
| LOC727787 | 0.015437985  | 6.126816344 | 0.492158322 |
| LOC728003 | -0.014369246 | 5.911041438 | 0.492160849 |
| TUBGCP6   | 0.016801268  | 6.728993438 | 0.492244076 |
| PPP2R2C   | -0.025011363 | 6.365132405 | 0.4922889   |
| TNFRSF17  | -0.019032716 | 5.920931613 | 0.492331588 |
| RPL10L    | 0.021780282  | 6.430940126 | 0.492372468 |
| LOC653692 | 0.017071398  | 6.086069509 | 0.49240995  |
| CYLD      | 0.022176202  | 6.777324319 | 0.492619796 |
| LOC645268 | -0.016357083 | 5.970129972 | 0.492680157 |
| PRR5      | -0.013347146 | 6.374110936 | 0.492693875 |
| GNAT2     | -0.020318546 | 5.973600098 | 0.492805987 |
| LOC652669 | -0.019190699 | 6.297778407 | 0.492837363 |
| TEX101    | -0.021076878 | 5.94520116  | 0.492921485 |
| ZNF492    | 0.012720863  | 6.157237875 | 0.492989651 |
| FAM129C   | 0.017345651  | 6.057619957 | 0.493024401 |
| FLJ31222  | -0.016814824 | 6.00504612  | 0.493060352 |
| SLC10A1   | -0.01798535  | 5.916659885 | 0.493098286 |
| LOC645177 | -0.017699777 | 6.087567363 | 0.493187273 |
| KCNJ15    | 0.011025478  | 6.094714081 | 0.493224137 |
| UGT1A8    | -0.018965546 | 5.889069257 | 0.493487245 |
| LOC646686 | -0.017927761 | 6.182051589 | 0.493493549 |
| FLJ41352  | -0.01016255  | 6.030096035 | 0.493551816 |
| LOC644629 | -0.017517375 | 6.240532406 | 0.493557299 |
| LOC653411 | 0.02132669   | 6.084986983 | 0.493733455 |
| OC90      | -0.017709375 | 5.977114123 | 0.493743488 |

## DEG.infomation

|           |              |             |             |
|-----------|--------------|-------------|-------------|
| LEMD1     | -0.017436547 | 5.953963188 | 0.493848113 |
| LOC647943 | 0.019936643  | 6.172912819 | 0.493851836 |
| LOC388458 | -0.019245258 | 6.173189386 | 0.493874156 |
| UPK3B     | 0.009724006  | 6.084387674 | 0.494069786 |
| PGGT1B    | -0.025646991 | 6.775905325 | 0.494080067 |
| LOC646043 | -0.030504181 | 6.201785235 | 0.494105565 |
| CDKN2A    | 0.011152797  | 6.065971753 | 0.494302248 |
| C12ORF23  | 0.055486185  | 7.768044609 | 0.49441864  |
| LOC645164 | -0.015896577 | 6.114932928 | 0.494443025 |
| BHLHB4    | 0.01789253   | 5.944045072 | 0.494573516 |
| LOC652854 | 0.01583502   | 5.970349525 | 0.494828623 |
| LOC400095 | 0.015854117  | 5.969339056 | 0.494841721 |
| LOC286310 | 0.014877124  | 6.583596944 | 0.494854882 |
| OR5D13    | 0.016461613  | 6.071740681 | 0.494858688 |
| MRO       | 0.018319632  | 5.952023265 | 0.494880423 |
| ABHD6     | -0.025174406 | 6.921285731 | 0.494909617 |
| LOC652272 | 0.018007049  | 6.093039482 | 0.494956424 |
| GNPTG     | 0.03109622   | 8.745709077 | 0.494971647 |
| C11ORF16  | 0.017952839  | 6.232752645 | 0.495009557 |
| LOC440871 | -0.017803495 | 6.007824252 | 0.495185788 |
| TGM5      | -0.009280636 | 6.022555464 | 0.495205622 |
| VDAC2     | 0.026328838  | 6.204883236 | 0.495263317 |
| LHX4      | -0.018499277 | 6.207267884 | 0.495338122 |
| FLJ42258  | 0.013437502  | 6.218160731 | 0.4954052   |
| LOC440551 | -0.023178944 | 6.03936197  | 0.495430979 |
| PHC2      | -0.023938915 | 7.039973614 | 0.495464213 |
| LOC441864 | 0.024280635  | 6.080268226 | 0.495468106 |
| CTDSP1    | 0.02693945   | 8.21392383  | 0.495554944 |
| BMP2KL    | 0.017714085  | 6.168509851 | 0.495608329 |
| LOC647533 | -0.014966343 | 5.986292439 | 0.495625876 |
| LOC650995 | 0.018559109  | 6.051619366 | 0.495682408 |
| KIAA1529  | 0.017995589  | 5.913198812 | 0.495708098 |
| HOXA10    | -0.011200701 | 5.987761711 | 0.495745235 |
| SEN3      | -0.032797704 | 6.163243427 | 0.49604451  |
| LOC646249 | 0.016135373  | 5.949876045 | 0.496131825 |
| SPEM1     | -0.019582495 | 6.138185754 | 0.496306931 |
| TJP3      | -0.016827238 | 6.059551067 | 0.49651545  |
| HAAO      | 0.017434616  | 6.311167056 | 0.496576121 |
| CBLN4     | 0.018911217  | 6.096308289 | 0.496626249 |
| LOC283849 | 0.024691555  | 6.192359505 | 0.4967784   |
| SOX10     | -0.021740085 | 6.296390601 | 0.496793366 |
| KBTD9     | 0.01680083   | 6.338742109 | 0.496831481 |
| PGK1      | -0.044474041 | 10.11392781 | 0.496835234 |
| DNAJC16   | -0.017071669 | 6.209038455 | 0.49686815  |
| LOC643100 | -0.019052056 | 6.07332029  | 0.496926174 |
| FXN       | -0.018025558 | 6.75639639  | 0.497041464 |
| TCF1      | -0.020304144 | 5.894529871 | 0.497089574 |
| ERMN      | -0.010235315 | 6.016053519 | 0.49713574  |
| LOC653885 | -0.019168605 | 6.176477822 | 0.497142063 |
| OR2H2     | 0.022985986  | 6.704856399 | 0.497262478 |
| NAT11     | 0.023654268  | 6.350262265 | 0.497293106 |

## DEG.infomation

|           |              |             |             |
|-----------|--------------|-------------|-------------|
| LOC648974 | 0.015744356  | 6.082648091 | 0.497376954 |
| ZFP42     | 0.017192171  | 6.04492752  | 0.49738826  |
| LOC441698 | 0.019723783  | 6.057436615 | 0.497652823 |
| MAST3     | 0.022804     | 6.906245144 | 0.497654469 |
| LOC388259 | -0.015064248 | 6.058898401 | 0.497677179 |
| SULT2A1   | 0.017343414  | 6.027534221 | 0.497712502 |
| ROPN1L    | 0.01766915   | 6.279919374 | 0.497876406 |
| LELP1     | -0.01571602  | 6.087512907 | 0.497954299 |
| FAM150A   | 0.016931366  | 5.982142692 | 0.497954606 |
| OSTN      | 0.016744054  | 6.005364729 | 0.497970186 |
| LOC647540 | 0.015894365  | 5.971160179 | 0.498327598 |
| FAM133B   | 0.037938974  | 8.072839683 | 0.498359003 |
| LOC642112 | 0.021217011  | 6.066453399 | 0.498392148 |
| MKKS      | 0.02301538   | 8.513359453 | 0.498413653 |
| L3MBTL2   | -0.022112155 | 7.316208407 | 0.498552335 |
| LOC648840 | -0.017066011 | 5.949982058 | 0.498590877 |
| LOC645955 | 0.015192024  | 6.141992042 | 0.498594773 |
| OR52B4    | -0.016944709 | 5.915393566 | 0.498630633 |
| LOC442261 | 0.018420037  | 6.107629964 | 0.498641499 |
| OR2M2     | -0.016379153 | 6.04953923  | 0.498651929 |
| MANEA     | -0.014654761 | 6.285669441 | 0.498670627 |
| LOC653418 | -0.017464955 | 6.01965485  | 0.49885866  |
| OR6C3     | -0.017766065 | 6.176744922 | 0.499115432 |
| NCR3      | 0.017457826  | 6.030892074 | 0.499186471 |
| FLJ37587  | -0.017886954 | 6.100267557 | 0.499219375 |
| DNASE1L2  | 0.018094379  | 6.085476052 | 0.499239328 |
| TADA2L    | -0.012467008 | 6.333510599 | 0.499245918 |
| FLJ16793  | -0.022046956 | 6.284834957 | 0.499295536 |
| WDFY1     | 0.036667672  | 9.085775049 | 0.499368834 |
| LOC652456 | 0.015325262  | 6.242162256 | 0.499407143 |
| ZNF77     | 0.024952367  | 6.596646132 | 0.499437202 |
| BARX2     | 0.019386918  | 6.14063364  | 0.499506369 |
| FABP2     | -0.020311938 | 6.263357417 | 0.499562912 |
| UNQ6975   | 0.018062552  | 6.048799346 | 0.499719669 |
| LOC730241 | 0.01838778   | 6.169164257 | 0.499745642 |
| EXDL2     | 0.028129161  | 7.822641522 | 0.499762032 |
| LOC645585 | -0.017985963 | 6.006832081 | 0.499770568 |
| SLC15A4   | 0.028516056  | 8.552828971 | 0.499776381 |
| HECW1     | 0.01910551   | 5.990509258 | 0.499816112 |
| KIAA0100  | 0.037900512  | 6.380777452 | 0.499845015 |
| LOC642497 | -0.016927107 | 5.985965571 | 0.499898649 |
| LOC158825 | 0.017191303  | 6.074586196 | 0.500060593 |
| LRRC36    | 0.016843261  | 5.988919757 | 0.500065087 |
| LOC441233 | -0.016758861 | 6.024804275 | 0.500068831 |
| CASP6     | -0.019824438 | 6.549263061 | 0.500071861 |
| LOC389786 | 0.017762699  | 6.068229843 | 0.500092351 |
| LOC554226 | 0.012780749  | 5.930300424 | 0.500099606 |
| NUBP1     | -0.029468781 | 8.404424277 | 0.500171297 |
| OR6S1     | 0.011520354  | 5.989405905 | 0.500310572 |
| ERVWE1    | -0.012570984 | 6.156255919 | 0.500381608 |
| NMBR      | -0.014861283 | 6.037456127 | 0.500435465 |

## DEG.infomation

|           |              |             |             |
|-----------|--------------|-------------|-------------|
| LOC644640 | -0.018291604 | 6.22797129  | 0.500440166 |
| LOC652148 | -0.016276713 | 6.014637926 | 0.500586738 |
| LOC732313 | -0.015825485 | 6.03692391  | 0.500624776 |
| LOC652633 | 0.022517055  | 6.233254737 | 0.500752222 |
| CPNE9     | -0.025704983 | 6.021601413 | 0.500769894 |
| ZNF547    | 0.017885588  | 5.954456144 | 0.500845148 |
| SMTNL1    | 0.018269667  | 6.221231821 | 0.500846954 |
| HMP19     | 0.023066888  | 6.327764699 | 0.500853213 |
| ZNF498    | -0.023363432 | 6.082751669 | 0.50090614  |
| LOC644419 | 0.016285247  | 6.053661422 | 0.500907116 |
| TMCO2     | 0.020731958  | 5.909896566 | 0.500909612 |
| LOC374973 | 0.014936794  | 6.070418296 | 0.5009438   |
| LOC652515 | 0.016399705  | 6.136225296 | 0.500988182 |
| SLC16A10  | -0.042728452 | 7.932945265 | 0.501056292 |
| LOC650887 | -0.017924478 | 5.96554601  | 0.501251174 |
| LOC652034 | 0.019442502  | 5.907801714 | 0.501279172 |
| LOC646110 | -0.015867493 | 6.051937416 | 0.501280254 |
| OR7G2     | 0.029799665  | 5.887483889 | 0.501367953 |
| LNX1      | -0.019480681 | 6.284255304 | 0.50137528  |
| EPHA4     | -0.049841447 | 7.663799486 | 0.501465395 |
| LOC652635 | -0.018789133 | 6.024391015 | 0.501649857 |
| ACAD9     | -0.023600608 | 8.411520853 | 0.501692499 |
| LOC442132 | 0.025893916  | 5.929745569 | 0.501789907 |
| LOC650668 | 0.015740656  | 6.020154952 | 0.501923053 |
| GFAP      | 0.018270717  | 6.103477014 | 0.502073052 |
| LOC646691 | -0.015349615 | 6.087062286 | 0.502089957 |
| ZNF780B   | 0.016772324  | 6.091979908 | 0.502164739 |
| LOC646976 | 0.016098651  | 6.095285244 | 0.502215613 |
| CEND1     | -0.016192583 | 6.249891949 | 0.502350647 |
| CCDC89    | 0.025001186  | 6.57589956  | 0.502408961 |
| CXCR4     | 0.034731164  | 6.328459314 | 0.502426519 |
| OR4N2     | 0.018294296  | 6.071729469 | 0.502467386 |
| NDUFA13   | 0.030843633  | 11.7320794  | 0.502484688 |
| OR4X1     | -0.016867084 | 6.067367971 | 0.502495458 |
| CLC       | -0.022227498 | 6.241293427 | 0.502515041 |
| C7ORF13   | -0.019753097 | 6.456663805 | 0.502528256 |
| FAM47A    | 0.018702647  | 6.049564786 | 0.502628259 |
| C15ORF54  | -0.020538595 | 5.970146545 | 0.502632437 |
| LOC402232 | -0.016471639 | 6.296137114 | 0.502646836 |
| RFPL3     | -0.016421496 | 6.086892355 | 0.502828338 |
| KRTAP4-8  | -0.020093562 | 6.332961832 | 0.502861239 |
| SERPINB10 | 0.015252469  | 6.150450539 | 0.502977823 |
| CAGE1     | 0.015023739  | 6.200300342 | 0.502979935 |
| UBE2V1    | 0.010260997  | 6.205538253 | 0.503169283 |
| GRPR      | -0.012191325 | 6.052812392 | 0.50318406  |
| LOC646730 | -0.018840091 | 6.020177377 | 0.503267748 |
| SGSM2     | -0.038860159 | 10.28779649 | 0.503350641 |
| AVPR2     | 0.020632485  | 6.208263995 | 0.503454205 |
| TBL1Y     | -0.013244935 | 6.103549983 | 0.503465324 |
| NPVF      | -0.015849005 | 5.991054169 | 0.503498183 |
| ZDHHC2    | 0.0280143    | 6.631335027 | 0.503517727 |

## DEG.infomation

|           |              |             |             |
|-----------|--------------|-------------|-------------|
| ADAM33    | -0.012282955 | 6.325765106 | 0.503593089 |
| NXNL2     | 0.012315777  | 6.09699068  | 0.503755764 |
| WSB2      | 0.050126604  | 8.761086349 | 0.503873246 |
| LOC651580 | 0.016523802  | 6.115831434 | 0.503892006 |
| HAPLN2    | 0.019077164  | 6.34316123  | 0.503900293 |
| LOC647234 | -0.016259612 | 6.066258632 | 0.503970762 |
| PLSCR5    | -0.016995412 | 6.064782361 | 0.503986726 |
| COL11A1   | 0.010552242  | 6.089142542 | 0.504013168 |
| FN3KRP    | -0.035389236 | 8.462776359 | 0.504078474 |
| LOC649940 | 0.014902492  | 6.025747997 | 0.504123407 |
| LOC643619 | 0.016842008  | 6.091466147 | 0.504154868 |
| LOC645537 | -0.019088773 | 5.946561935 | 0.504192291 |
| TTC23L    | 0.016368924  | 6.162252536 | 0.50422204  |
| LOC221981 | 0.011864591  | 6.113581184 | 0.504467946 |
| LOC652871 | -0.019958728 | 6.133763373 | 0.504481093 |
| LOC646335 | -0.016899811 | 5.959883965 | 0.504586538 |
| C9ORF165  | 0.02075923   | 5.975001901 | 0.50458654  |
| PADI6     | 0.016816541  | 6.125723205 | 0.504617069 |
| NALCN     | 0.018965576  | 6.132798685 | 0.504700125 |
| NACA2     | 0.024303254  | 5.901827221 | 0.50476347  |
| FAM162B   | -0.048722531 | 8.646518548 | 0.504855962 |
| OR6K3     | -0.015777504 | 6.032469517 | 0.504878045 |
| GCUD2     | -0.020484909 | 6.058702205 | 0.504980201 |
| LOC649878 | -0.016502528 | 6.044391496 | 0.504995702 |
| SH3BGRL   | 0.032857482  | 7.665237237 | 0.505216283 |
| LOC641912 | 0.018915993  | 6.110940384 | 0.50526757  |
| LOC642132 | 0.017936122  | 6.04623038  | 0.505273322 |
| LOC652678 | -0.01932806  | 6.013048389 | 0.505475915 |
| FSHB      | 0.016344074  | 5.99295572  | 0.505492244 |
| ZNF391    | 0.021926894  | 5.863909182 | 0.505496727 |
| LOC643855 | 0.016234792  | 6.153936728 | 0.505536309 |
| PCDHB5    | 0.026881602  | 6.587452139 | 0.505591294 |
| ACSBG1    | 0.024244915  | 6.222389548 | 0.505651684 |
| LOC642403 | -0.01727132  | 6.283720339 | 0.505699732 |
| LOC650120 | 0.016394667  | 6.045597435 | 0.505850521 |
| NR1D2     | 0.038398769  | 6.99122939  | 0.505859438 |
| LOC388955 | 0.019176126  | 6.110693492 | 0.505873573 |
| LOC642111 | -0.023049201 | 5.867587085 | 0.505944439 |
| MLC1      | 0.012027942  | 5.982012254 | 0.506097125 |
| CYP2E1    | -0.021066392 | 6.33299474  | 0.506216237 |
| LOC646947 | 0.018121925  | 5.903583896 | 0.506296383 |
| LOC651578 | -0.017081617 | 6.08236921  | 0.506383845 |
| KRTAP19-4 | 0.01708959   | 6.029545623 | 0.5064072   |
| TNFRSF13C | -0.039345084 | 8.199984063 | 0.506437449 |
| LOC147710 | -0.014386747 | 6.096376255 | 0.506460254 |
| LOC642539 | 0.015507665  | 6.177122787 | 0.506477248 |
| LOC650673 | 0.015969459  | 6.10261905  | 0.506484561 |
| ASB7      | 0.013052746  | 6.076024483 | 0.506532952 |
| LOC389888 | 0.017497546  | 6.039142373 | 0.50668109  |
| ADH6      | 0.015503386  | 6.256292762 | 0.506710028 |
| NBPF9     | -0.00858036  | 6.154555895 | 0.506769629 |

## DEG.infomation

|           |              |             |             |
|-----------|--------------|-------------|-------------|
| GABRQ     | -0.015452538 | 5.936020365 | 0.506884737 |
| LOC652115 | 0.01631107   | 6.161700854 | 0.506982767 |
| FAM90A2P  | -0.008472382 | 6.126464671 | 0.507082652 |
| RAB14     | 0.021006133  | 6.362346954 | 0.507109877 |
| LOC652195 | -0.019464541 | 6.360489776 | 0.507257978 |
| ADCY9     | -0.032744222 | 8.18494123  | 0.507268126 |
| IQGAP3    | -0.019681243 | 6.461236702 | 0.507276787 |
| TAF11     | -0.017627115 | 6.290671198 | 0.507325272 |
| LOC650439 | 0.015698114  | 6.008744913 | 0.507583838 |
| FASLG     | 0.01748021   | 6.106041081 | 0.507619228 |
| C7ORF46   | -0.020623904 | 6.25001385  | 0.507655937 |
| ANKMY1    | 0.011922513  | 6.399836845 | 0.507745896 |
| LOC652799 | -0.0184531   | 5.955210929 | 0.507750638 |
| GJB2      | 0.023558681  | 6.137235157 | 0.507857282 |
| SCNN1G    | 0.01196147   | 6.073822916 | 0.507960658 |
| PCDHGB2   | 0.015561845  | 6.094493888 | 0.50801717  |
| SPN       | -0.020942591 | 6.616395177 | 0.508152625 |
| LOC401442 | 0.026242416  | 5.940192487 | 0.508231008 |
| ZNF346    | -0.020417699 | 6.290716032 | 0.508422671 |
| LOC651558 | -0.021901122 | 6.413308346 | 0.508422682 |
| RPS13     | -0.030244867 | 12.46895899 | 0.508424945 |
| WHSC1L1   | 0.01107009   | 6.290353025 | 0.508549665 |
| EOMES     | -0.021038587 | 5.93357721  | 0.50865474  |
| SESN2     | 0.017917099  | 6.197588648 | 0.508675632 |
| LOC644677 | -0.016022991 | 6.071343102 | 0.508781784 |
| PABPC3    | -0.018938749 | 6.058240205 | 0.50880192  |
| LOC283711 | 0.016446319  | 6.269391803 | 0.508835269 |
| LOC642383 | -0.014942749 | 5.937775025 | 0.508873477 |
| TRIML1    | -0.01849061  | 6.403624354 | 0.508893213 |
| LOC648791 | -0.024722352 | 6.298153697 | 0.508916123 |
| LOC643037 | -0.018574981 | 6.01304369  | 0.508966558 |
| LOC728498 | 0.012138718  | 6.103564772 | 0.50897542  |
| LOC645162 | -0.015161685 | 5.943454641 | 0.509065932 |
| LOC392583 | -0.017217771 | 6.036440102 | 0.509262236 |
| ZNF672    | 0.029650051  | 9.269113679 | 0.509355204 |
| MAPT      | 0.04650767   | 6.903260149 | 0.509362343 |
| VPS13B    | -0.008742683 | 6.185366945 | 0.509374115 |
| TRIM44    | 0.029441945  | 9.60997931  | 0.509379878 |
| LOC645785 | 0.017599245  | 6.118858145 | 0.509386573 |
| POP4      | 0.038405591  | 7.506294288 | 0.509434832 |
| RPL9      | 0.034611505  | 11.97315587 | 0.509480987 |
| LOC643809 | 0.020273886  | 6.125201735 | 0.509543768 |
| MMPL1     | 0.015399423  | 6.242828938 | 0.50957445  |
| LOC653636 | -0.016068616 | 6.067096933 | 0.509591118 |
| LOR       | -0.018709393 | 5.956961691 | 0.509592173 |
| C13ORF31  | 0.026230497  | 6.268296911 | 0.509640963 |
| LOC729558 | 0.021021695  | 6.293783597 | 0.509666016 |
| ADM2      | -0.02403738  | 6.816543755 | 0.509822692 |
| LOC440570 | -0.016317076 | 6.051234557 | 0.509839389 |
| LENG9     | 0.017179351  | 6.049877074 | 0.509866775 |
| LOC645355 | -0.015548461 | 6.329276652 | 0.509873111 |



## DEG.infomation

|           |              |             |             |
|-----------|--------------|-------------|-------------|
| LOC154449 | -0.015655883 | 6.029933617 | 0.509893016 |
| BCLAF1    | 0.024848346  | 8.819755048 | 0.509914764 |
| SRD5A2    | 0.020543204  | 6.131378623 | 0.510111449 |
| CAMSAP1L1 | 0.041274595  | 8.767891282 | 0.510141192 |
| C17ORF37  | 0.023927705  | 6.889944727 | 0.510149071 |
| C6ORF146  | 0.018670845  | 5.992959788 | 0.510266697 |
| NANOG     | -0.017247107 | 5.994934022 | 0.510360711 |
| LRIT1     | 0.016077481  | 6.0548678   | 0.510550156 |
| SLC25A24  | 0.014957152  | 6.373164138 | 0.510551233 |
| SLC10A2   | -0.01742084  | 6.050273685 | 0.51055127  |
| LOC642155 | 0.016834587  | 6.085635082 | 0.510662159 |
| LOC729175 | -0.017736321 | 6.173618547 | 0.510777748 |
| ARHGAP17  | 0.026447726  | 8.65700828  | 0.510828774 |
| KIAA1919  | -0.01762812  | 6.013712689 | 0.510838278 |
| LOC388885 | 0.01695884   | 5.953280586 | 0.510869892 |
| LOC401911 | -0.013422027 | 6.015684491 | 0.510877997 |
| LOC649210 | -0.015885364 | 6.376512857 | 0.511188372 |
| LOC647836 | 0.016783848  | 5.978242293 | 0.511289473 |
| C13ORF26  | 0.012527181  | 6.044290398 | 0.511419348 |
| LOC731438 | -0.018549812 | 5.91086129  | 0.511631501 |
| GSG1L     | -0.023748333 | 6.509706285 | 0.511640789 |
| LOC643749 | 0.017475382  | 5.99228387  | 0.511696134 |
| FAM99A    | 0.014477584  | 5.952520317 | 0.511699627 |
| PRM2      | -0.01778471  | 5.880820568 | 0.51174613  |
| LOC645113 | 0.017481698  | 6.075061127 | 0.511858893 |
| LOC653136 | 0.016124381  | 6.203151374 | 0.511884352 |
| RTN4RL2   | -0.016335378 | 6.072283386 | 0.511935554 |
| SPOPL     | 0.024719809  | 6.693771164 | 0.512143838 |
| PIK3C2G   | -0.017006807 | 5.919801256 | 0.512177277 |
| FLJ32658  | 0.017618464  | 6.004540318 | 0.512235204 |
| PCP4L1    | -0.017012462 | 5.972963214 | 0.512389022 |
| PIGX      | -0.03676068  | 6.619436795 | 0.512458933 |
| PLEKHG7   | -0.015879751 | 6.264515723 | 0.512481776 |
| POLR3G    | -0.010554213 | 6.02705726  | 0.512548673 |
| HS6ST2    | -0.011658815 | 6.041394378 | 0.512717592 |
| MED19     | 0.034855672  | 8.30114417  | 0.512736297 |
| LOC646677 | -0.040649194 | 6.699483734 | 0.512817223 |
| WNT7A     | -0.017295238 | 6.063129443 | 0.512827669 |
| BCORL1    | -0.020388972 | 6.318948226 | 0.512914441 |
| LOC648040 | 0.019560325  | 5.974861885 | 0.512927259 |
| CHIA      | -0.012322217 | 6.01977299  | 0.512958567 |
| ICF45     | 0.019649176  | 6.336224057 | 0.512961247 |
| ARHGAP25  | 0.014823251  | 6.433581677 | 0.512962359 |
| LOC401206 | -0.030910641 | 14.17150235 | 0.512966018 |
| CLDN20    | 0.02068731   | 6.468091449 | 0.512973119 |
| LOC441551 | 0.015178152  | 6.089860065 | 0.512977998 |
| LOC390998 | 0.018201148  | 6.062894525 | 0.513192183 |
| SMG6      | 0.024746286  | 6.279093295 | 0.513223242 |
| USF1      | 0.030732317  | 7.071083609 | 0.513225981 |
| FLJ44186  | 0.015414851  | 6.097564991 | 0.513256486 |
| CRYAA     | -0.017344466 | 6.114955281 | 0.513281419 |

## DEG.infomation

|              |              |             |             |
|--------------|--------------|-------------|-------------|
| LRR4B        | -0.013238547 | 5.953180116 | 0.513354838 |
| MALAT1       | -0.017856095 | 6.041009441 | 0.513389123 |
| OR2L2        | -0.017200305 | 5.94941581  | 0.513419547 |
| LOC651006    | 0.018039582  | 6.124001822 | 0.51343942  |
| LOC650038    | 0.013567343  | 6.013655444 | 0.51357784  |
| KIAA1524     | -0.011360666 | 5.994264002 | 0.513682539 |
| LOC283340    | -0.017181755 | 5.978349675 | 0.513699658 |
| TBN          | 0.020945149  | 6.397793176 | 0.513739856 |
| PGLYRP3      | 0.010844164  | 6.086424607 | 0.513745226 |
| PTPRT        | -0.010479683 | 6.091798367 | 0.513756264 |
| INCA         | 0.014224846  | 6.021626778 | 0.51379152  |
| IL8RB        | -0.016432341 | 6.236012943 | 0.513819379 |
| TRIM6-TRIM34 | -0.012282188 | 5.93665744  | 0.513849411 |
| CXCR5        | 0.013404782  | 6.274828376 | 0.513982532 |
| CRISP2       | 0.019141989  | 6.180396779 | 0.514012368 |
| LOC613266    | 0.019969348  | 6.001493951 | 0.514048933 |
| MYLK         | 0.018904326  | 6.592871767 | 0.514050847 |
| CXCL17       | 0.01808819   | 6.088665634 | 0.514142445 |
| IL34         | 0.023660197  | 6.276944835 | 0.514157073 |
| EPOR         | 0.021054007  | 6.418128088 | 0.514267796 |
| LOC652710    | -0.022585626 | 5.899660516 | 0.514341747 |
| GSTO1        | 0.024915169  | 12.27962338 | 0.514442134 |
| ALKBH1       | -0.019376116 | 7.122526696 | 0.514515327 |
| PBX2         | 0.036454313  | 7.417722924 | 0.514537482 |
| EIF4E1B      | 0.022432723  | 6.129773336 | 0.514612007 |
| LOC644010    | 0.009525309  | 6.074646726 | 0.514657256 |
| C9ORF122     | 0.020575167  | 5.929347006 | 0.514669089 |
| VAT1         | -0.039425174 | 7.940768329 | 0.514706679 |
| LY6G6E       | 0.018002441  | 6.043649318 | 0.514798467 |
| LOC647784    | -0.01129193  | 5.950897253 | 0.514884526 |
| SLC17A1      | -0.021270216 | 5.911167815 | 0.51489151  |
| XAGE5        | -0.017640738 | 5.885188467 | 0.514944455 |
| IQSEC2       | -0.016675432 | 6.333966821 | 0.515017102 |
| UBE1         | -0.034575996 | 9.371754966 | 0.515092417 |
| LOC642370    | 0.023744173  | 6.025386414 | 0.515092955 |
| LOC641788    | 0.023427534  | 6.310222454 | 0.515094722 |
| LOC652142    | 0.015934337  | 5.992219914 | 0.515104735 |
| THSD3        | 0.010056157  | 5.992966416 | 0.515346307 |
| C1QTNF8      | 0.021815853  | 6.114058786 | 0.515454049 |
| LOC648898    | 0.009173626  | 6.021420627 | 0.515464386 |
| LOC643213    | -0.016734063 | 6.194436215 | 0.515566755 |
| PDHA1        | -0.048602817 | 11.28030724 | 0.515724984 |
| LOC648130    | -0.024919762 | 5.994022506 | 0.515795642 |
| OR52M1       | -0.016186789 | 5.989937621 | 0.515830504 |
| LPAR5        | -0.046331173 | 7.742351256 | 0.515910536 |
| LOC645448    | -0.015120959 | 6.016239279 | 0.515954008 |
| FAM82A2      | 0.041745019  | 8.042866414 | 0.516002384 |
| MEST         | -0.010084519 | 5.991570971 | 0.516218105 |
| KRTAP5-9     | -0.017175143 | 6.063944825 | 0.51628863  |
| LCE3E        | -0.019392975 | 6.063272594 | 0.516342939 |
| C11ORF24     | -0.028573433 | 7.711382611 | 0.516508064 |

## DEG.infomation

|           |              |             |             |
|-----------|--------------|-------------|-------------|
| COLQ      | -0.057896    | 7.233538876 | 0.516519798 |
| RPRM      | -0.016710915 | 6.001045103 | 0.516551437 |
| C3ORF27   | 0.017606548  | 5.964404088 | 0.516666371 |
| ZNF718    | -0.015514001 | 6.294162504 | 0.516716241 |
| SAGE1     | -0.010966    | 5.991077375 | 0.516758663 |
| LOC644617 | 0.027617735  | 6.258355053 | 0.516826425 |
| PURG      | 0.018868179  | 6.461724369 | 0.516848101 |
| IMPG2     | 0.018082024  | 6.441899306 | 0.516909763 |
| ELAC2     | -0.026417289 | 8.210126083 | 0.516968455 |
| MAP3K14   | 0.026935187  | 6.746078739 | 0.517018282 |
| E2F7      | 0.022055822  | 6.06913635  | 0.517116004 |
| TSPAN19   | -0.014630524 | 6.171320742 | 0.517201526 |
| AFM       | 0.019327138  | 5.826549786 | 0.51723671  |
| LOC651315 | -0.018927037 | 5.958759256 | 0.517308923 |
| GPR158L1  | 0.015440862  | 6.093485731 | 0.517314548 |
| FKSG83    | -0.015977559 | 6.092271367 | 0.517350385 |
| ZNF440    | 0.016218859  | 5.977184715 | 0.517370735 |
| TCERG1L   | -0.018237356 | 5.920579268 | 0.517693366 |
| GPR12     | -0.016188227 | 6.047718621 | 0.517775623 |
| LOC727994 | 0.017918786  | 6.065562761 | 0.517802787 |
| CXORF21   | 0.012736406  | 6.041485775 | 0.517814503 |
| TCOF1     | -0.009539757 | 6.075922507 | 0.517833109 |
| LOC647363 | 0.018576222  | 6.620671123 | 0.517865753 |
| C6ORF70   | -0.024268212 | 7.092194843 | 0.517943399 |
| ACD       | -0.021966268 | 7.030941191 | 0.517983391 |
| SLC16A1   | 0.016808763  | 6.138260681 | 0.518019103 |
| LOC646863 | 0.014595014  | 6.230883788 | 0.518066817 |
| RPAP2     | 0.026783433  | 7.879518332 | 0.518129827 |
| LOC648237 | 0.014748415  | 6.072284067 | 0.518256671 |
| EFHB      | -0.013511985 | 6.138400467 | 0.518299539 |
| LOC642650 | 0.016533428  | 6.037594773 | 0.518354926 |
| B3GALT2   | 0.059606461  | 7.26732709  | 0.518375278 |
| LOC642354 | 0.015397171  | 5.977833654 | 0.518388208 |
| ATAD3C    | -0.016713691 | 6.20357518  | 0.518407084 |
| LOC650406 | 0.017513528  | 6.211385259 | 0.518411699 |
| OR5B3     | 0.020251523  | 5.917997386 | 0.518506139 |
| LCAP      | 0.012517595  | 6.172730159 | 0.51856616  |
| HSFY2     | -0.007923031 | 5.989591047 | 0.51857987  |
| LOC652692 | 0.016507136  | 5.953770115 | 0.518666933 |
| ST7OT1    | 0.020201901  | 6.24326585  | 0.518680235 |
| C11ORF70  | -0.013755711 | 6.255796255 | 0.518703581 |
| LAIR1     | -0.051383867 | 13.77766634 | 0.518914667 |
| SPINK5    | 0.018017469  | 6.200376636 | 0.518937867 |
| LOC642677 | -0.016478448 | 6.073822014 | 0.519039955 |
| GNAZ      | 0.033607113  | 6.120946452 | 0.519123731 |
| LOC643331 | -0.020800992 | 5.895369424 | 0.519195257 |
| LOC643069 | 0.016337391  | 6.097335773 | 0.519201507 |
| LOC648365 | 0.018401457  | 6.0471166   | 0.519469816 |
| LOC652281 | 0.023448767  | 6.326061081 | 0.519471426 |
| GPR172B   | -0.014681314 | 6.036031174 | 0.519488933 |
| WBP11P1   | 0.008493649  | 6.031893016 | 0.519540141 |

## DEG.infomation

|           |              |             |             |
|-----------|--------------|-------------|-------------|
| PPBP      | 0.022635728  | 5.956243381 | 0.519678971 |
| ZNF267    | -0.020207367 | 5.896392468 | 0.519751288 |
| SLC13A3   | 0.013483484  | 6.338183613 | 0.519836141 |
| STRADB    | -0.043258808 | 9.309039299 | 0.51985532  |
| TMEM103   | 0.017775928  | 7.924061675 | 0.519867701 |
| HCN1      | -0.019145394 | 6.041122921 | 0.51988089  |
| C9ORF47   | 0.017864848  | 6.094364273 | 0.519883579 |
| LOC644574 | -0.018451566 | 6.141141468 | 0.519924641 |
| LOC643576 | -0.01491795  | 6.042636189 | 0.51994438  |
| LOC283682 | -0.017280558 | 6.00872769  | 0.519953364 |
| LOC148709 | -0.016729372 | 6.043259326 | 0.519973019 |
| LOC341112 | 0.018729889  | 6.15315578  | 0.52004981  |
| RPS28     | -0.059222756 | 11.89714944 | 0.52020525  |
| OR9G9     | 0.01554398   | 6.035490869 | 0.520436861 |
| LOC643910 | 0.019329686  | 5.985570049 | 0.520553946 |
| SACM1L    | 0.046339569  | 8.398773095 | 0.520596918 |
| TRIML2    | -0.018080575 | 6.039327084 | 0.520609384 |
| LOC643130 | -0.014751474 | 6.078249801 | 0.520679534 |
| LOC387927 | 0.017879326  | 6.302260517 | 0.520684901 |
| BCL10     | -0.013899728 | 6.446214869 | 0.520718613 |
| MRPS2     | 0.025198027  | 8.576380336 | 0.520726482 |
| LOC392617 | -0.016552591 | 5.968659804 | 0.520819988 |
| APBA1     | -0.011025789 | 6.035434156 | 0.520850292 |
| SYNGR2    | 0.014275682  | 6.082220415 | 0.520866634 |
| PRF1      | 0.028250793  | 6.318723133 | 0.520906733 |
| C14ORF138 | 0.018723767  | 7.146268008 | 0.520960583 |
| MCPH1     | 0.031025722  | 7.017494158 | 0.521004073 |
| WNT16     | -0.01339722  | 6.380091482 | 0.521018918 |
| BCL7A     | 0.01586286   | 6.111558887 | 0.521161296 |
| LOC648521 | -0.015694212 | 5.909800126 | 0.521197966 |
| KCNK13    | -0.026204978 | 6.1456534   | 0.521235025 |
| TESSP1    | -0.016242275 | 6.035448619 | 0.521245287 |
| LOC642568 | -0.015555282 | 5.8925317   | 0.521517457 |
| FANCM     | 0.024994801  | 6.013656309 | 0.521654149 |
| LOC650058 | -0.015556385 | 6.156265927 | 0.521782946 |
| GAS5      | 0.021073588  | 6.011871732 | 0.521787228 |
| LOC728193 | -0.015497223 | 6.247041196 | 0.521798447 |
| C11ORF36  | 0.015324146  | 6.07513675  | 0.521822034 |
| DDB1      | -0.018579144 | 10.17080663 | 0.521840885 |
| ZNF452    | -0.012953367 | 6.040168575 | 0.521849047 |
| LOC644736 | 0.014709538  | 6.02896329  | 0.52191321  |
| MRPL15    | 0.042745999  | 11.13144683 | 0.521934592 |
| OTUB2     | -0.009941213 | 6.149608566 | 0.522102435 |
| GLRA2     | -0.016026896 | 5.978029176 | 0.522114408 |
| IFNB1     | -0.01965205  | 5.899546196 | 0.522196077 |
| IL8RBP    | -0.015335564 | 6.009759172 | 0.522225203 |
| LOC124220 | 0.019643631  | 5.903233926 | 0.522245597 |
| LRRC18    | 0.02024066   | 6.057789909 | 0.522267554 |
| LOC440434 | -0.013592643 | 6.042189106 | 0.522371024 |
| PDZD11    | -0.011906603 | 6.161500203 | 0.522432202 |
| MS4A3     | -0.009934099 | 5.958864776 | 0.522531587 |

DEG.infomation

|           |              |             |             |
|-----------|--------------|-------------|-------------|
| LOC345537 | 0.017076337  | 6.055858292 | 0.522573533 |
| LOC399829 | -0.017805771 | 6.091916333 | 0.522586124 |
| LOC644762 | 0.033581402  | 8.371332456 | 0.522590671 |
| LOC389151 | 0.014803033  | 5.972712942 | 0.52261047  |
| TTY12     | 0.017887374  | 5.967952587 | 0.522655495 |
| PARDB     | -0.017699664 | 6.172801201 | 0.522706621 |
| PTPRN     | -0.019030569 | 5.990436416 | 0.522716739 |
| LHFPL1    | 0.026576429  | 6.013893603 | 0.522840218 |
| LOC643075 | -0.016764368 | 5.949858611 | 0.522970307 |
| RAB11FIP4 | -0.018886451 | 6.15944299  | 0.522974313 |
| C17ORF67  | -0.027620012 | 5.963837861 | 0.523002009 |
| LOC200261 | 0.015925655  | 6.110490791 | 0.523051389 |
| LOC643302 | 0.01645079   | 5.87842825  | 0.523102877 |
| LOC643435 | -0.016573716 | 6.039071333 | 0.52312087  |
| LOC649255 | -0.015623747 | 5.947967154 | 0.523195987 |
| LOC641938 | 0.017311756  | 6.134691184 | 0.523220865 |
| VCY1B     | -0.016421073 | 5.989756619 | 0.523331685 |
| LOC284293 | 0.0170886    | 6.11294226  | 0.523364202 |
| LOC652155 | 0.019277818  | 6.204523794 | 0.52354976  |
| LOC730226 | 0.016318869  | 6.41658179  | 0.523558694 |
| FLJ37543  | 0.019336993  | 6.051243527 | 0.523559486 |
| LOC642121 | -0.016961484 | 6.014646931 | 0.523607576 |
| OR7E156P  | 0.017368253  | 6.795485082 | 0.523851643 |
| NLRP11    | 0.015792867  | 5.972191953 | 0.523864758 |
| LOC652597 | 0.022239635  | 6.053248306 | 0.52393208  |
| SPIB      | -0.015909419 | 5.999857643 | 0.52399837  |
| SPSB2     | -0.03811282  | 6.635860571 | 0.524029961 |
| LOC646697 | -0.016793045 | 6.186103139 | 0.524073383 |
| LOC401497 | -0.018665735 | 6.362083564 | 0.524213926 |
| OR2F1     | -0.017768646 | 5.980732905 | 0.524264419 |
| ENTPD7    | 0.021054854  | 6.076094573 | 0.524350982 |
| HSPC159   | -0.035094157 | 6.936573976 | 0.524446688 |
| CCKAR     | 0.015952575  | 6.085389394 | 0.524480697 |
| SCN4A     | 0.018855268  | 6.154207098 | 0.524510661 |
| SNAI1     | -0.01545645  | 5.940956356 | 0.524559158 |
| LOC650147 | 0.01603491   | 6.124321141 | 0.524876667 |
| LSM14A    | 0.023226374  | 9.869490931 | 0.52502878  |
| OR10P1    | -0.022095126 | 6.000628018 | 0.525033091 |
| OR52E4    | 0.015508252  | 6.067767515 | 0.525147279 |
| TMEM63B   | -0.039679799 | 6.854500757 | 0.525419012 |
| LOC440005 | 0.018943027  | 5.875680917 | 0.525426605 |
| LOC442117 | -0.01633722  | 5.981233031 | 0.525452263 |
| LOC284260 | -0.015488452 | 6.023263881 | 0.525522223 |
| LOC642861 | -0.017315418 | 5.933891709 | 0.525535339 |
| LOC727855 | 0.015255261  | 6.152057424 | 0.525568771 |
| PGRMC2    | 0.031235579  | 10.6061185  | 0.525581576 |
| LOC442229 | -0.015905542 | 6.108141688 | 0.525652017 |
| TSSK3     | 0.017935209  | 6.505215864 | 0.525676363 |
| CPA1      | -0.018462723 | 5.975130541 | 0.525700082 |
| LOC642726 | -0.012633506 | 6.416261128 | 0.525747585 |
| LOC392275 | -0.009822905 | 6.075655682 | 0.525778244 |

## DEG.infomation

|           |              |             |             |
|-----------|--------------|-------------|-------------|
| CACYBP    | -0.024016328 | 7.660961988 | 0.52578415  |
| LOC727732 | 0.012232463  | 6.094448972 | 0.525849499 |
| LOC347364 | 0.01564453   | 6.200806446 | 0.525901848 |
| PSG11     | 0.014190516  | 5.976462542 | 0.526012289 |
| CACNA1G   | -0.007675029 | 6.011937884 | 0.526045683 |
| LRIT3     | -0.015661839 | 5.984925111 | 0.526067718 |
| ZNF761    | 0.016013625  | 6.220879968 | 0.526093024 |
| KIAA1957  | -0.015855931 | 6.106720242 | 0.526149663 |
| LOC730242 | 0.015236505  | 6.070584956 | 0.526158534 |
| LOC647212 | 0.015568445  | 6.063093014 | 0.526247259 |
| LOC649246 | -0.014741452 | 6.160878046 | 0.52635369  |
| LOC654172 | 0.011078051  | 6.043149348 | 0.526364512 |
| LOC647447 | 0.007438083  | 5.994071492 | 0.526471047 |
| PBEF1     | -0.016402907 | 6.287439615 | 0.526515345 |
| LOC653676 | -0.015308208 | 6.143325627 | 0.526632538 |
| CGB5      | 0.012324508  | 6.089927833 | 0.526657021 |
| LOC644100 | 0.010811301  | 6.099632507 | 0.526810174 |
| TSPAN6    | 0.020441245  | 6.906916066 | 0.526815189 |
| LOC648868 | 0.014411591  | 6.072505876 | 0.526822978 |
| SMR3A     | -0.016449196 | 6.01444575  | 0.527078287 |
| INTS7     | -0.022832373 | 6.768785054 | 0.527087502 |
| EIF4G2    | -0.019218161 | 11.63187648 | 0.527114847 |
| SPATC1    | 0.011029114  | 6.135536175 | 0.527119804 |
| BRUNOL5   | -0.015518394 | 6.061014672 | 0.527156782 |
| FXC1      | 0.022971914  | 7.849987949 | 0.527173677 |
| C19ORF45  | -0.018749856 | 6.029978905 | 0.527317752 |
| KIAA1644  | -0.015924153 | 6.14422391  | 0.52740697  |
| DDX52     | 0.022571621  | 7.129264667 | 0.527435263 |
| HPX       | 0.018785115  | 6.103563322 | 0.527456553 |
| METRN     | -0.034552125 | 7.062649459 | 0.527469166 |
| MGC16291  | 0.013609972  | 5.981699589 | 0.5274976   |
| LOC653310 | -0.01739266  | 6.018813985 | 0.527528236 |
| CSN1S1    | -0.013497797 | 5.993247691 | 0.52761764  |
| GIF       | 0.015444773  | 6.084267845 | 0.527654586 |
| CMPK2     | -0.021557506 | 6.083536476 | 0.527662005 |
| LOC642035 | 0.015942369  | 6.125110239 | 0.527668351 |
| LOC646296 | 0.017066117  | 6.202605183 | 0.527693138 |
| KRTAP23-1 | 0.015240414  | 6.080867169 | 0.527720588 |
| LOC648894 | -0.016475052 | 6.010268785 | 0.527795122 |
| PYHIN1    | 0.010384653  | 6.149934562 | 0.5278141   |
| LOC652408 | -0.0152929   | 6.111190823 | 0.527934564 |
| RAP2A     | 0.03859087   | 8.75641484  | 0.527990045 |
| LOC641959 | 0.016331983  | 6.365837792 | 0.528160373 |
| EFNA1     | -0.04132266  | 9.326566623 | 0.528197366 |
| LOC647521 | 0.016906312  | 6.308149782 | 0.528202054 |
| LOC652471 | -0.014351905 | 5.986464561 | 0.528205729 |
| LOC645143 | -0.014455773 | 6.072989632 | 0.528211942 |
| GIGYF1    | 0.017678175  | 6.483833163 | 0.528274203 |
| LOC399937 | 0.009971626  | 5.988202951 | 0.528275657 |
| LOC345222 | -0.016740587 | 6.064148119 | 0.528435498 |
| LOC642223 | 0.015537797  | 6.048869356 | 0.528536885 |

## DEG.infomation

|               |              |             |             |
|---------------|--------------|-------------|-------------|
| DLX5          | 0.017630473  | 6.091233797 | 0.528597244 |
| FLJ46481      | -0.015715784 | 6.402609492 | 0.528661703 |
| TNS4          | -0.018283534 | 6.223953013 | 0.528677485 |
| LOC653853     | -0.011870355 | 6.064151367 | 0.528691844 |
| LOC654127     | 0.016013132  | 6.054863531 | 0.528770239 |
| C6ORF81       | -0.025000905 | 6.796043123 | 0.52879512  |
| SMOC1         | -0.013253863 | 6.001603083 | 0.528798248 |
| OTOG          | -0.015582745 | 6.090657679 | 0.528827401 |
| KIAA1285      | 0.027103323  | 6.299464461 | 0.528859606 |
| IGSF8         | 0.018219885  | 6.253196292 | 0.528886469 |
| TACR1         | 0.01021763   | 6.059666765 | 0.52892122  |
| KRTAP4-11     | 0.016882048  | 5.977563771 | 0.52900858  |
| BRDT          | -0.010884539 | 5.940725131 | 0.529038361 |
| SNX20         | -0.011464836 | 6.084805125 | 0.52910916  |
| OTUB1         | 0.017408984  | 7.031605873 | 0.52913074  |
| PF4V1         | 0.016190917  | 6.347372547 | 0.529134863 |
| UBE2E1        | -0.029061469 | 9.839567848 | 0.529238994 |
| LOC641848     | 0.084664254  | 8.461903737 | 0.529309531 |
| C15ORF41      | -0.053344418 | 10.45651571 | 0.529386125 |
| LOC648625     | 0.015041502  | 6.06087457  | 0.529388154 |
| MYH16         | 0.011436901  | 6.174181517 | 0.529394656 |
| LOC644431     | -0.016447824 | 6.0745157   | 0.529601842 |
| LOC645411     | -0.01515926  | 6.277968487 | 0.529637602 |
| IFNA6         | -0.017909151 | 5.90273977  | 0.529671445 |
| NT5M          | 0.026654008  | 6.631709346 | 0.529747764 |
| CSH1          | 0.01013658   | 5.980189789 | 0.52978198  |
| EPB42         | -0.017463701 | 5.975263736 | 0.52980492  |
| LOC732156     | -0.015446907 | 6.132428882 | 0.529897265 |
| LOC648931     | 0.015454543  | 6.133103724 | 0.530001761 |
| LOC647529     | -0.020576524 | 5.980000071 | 0.530075583 |
| RPL37A        | -0.036391941 | 12.19421497 | 0.53014347  |
| LOC390205     | 0.018536747  | 6.104368132 | 0.530165528 |
| CRNN          | -0.040565653 | 8.183375416 | 0.530198621 |
| LOC728302     | -0.017440417 | 5.993400788 | 0.530202711 |
| FCGR2C        | -0.018094749 | 5.892549435 | 0.530300068 |
| GSTA3         | -0.011791247 | 6.108840746 | 0.530437954 |
| LOC256223     | 0.01535334   | 6.008743276 | 0.530532842 |
| SLC24A4       | 0.010076296  | 6.180612227 | 0.530549218 |
| LOC646818     | -0.016838812 | 5.893543461 | 0.530602828 |
| T             | 0.011851943  | 5.977246328 | 0.53062877  |
| EHF           | -0.015601702 | 6.22096208  | 0.530826804 |
| LOC651481     | -0.015651842 | 5.88334465  | 0.530845074 |
| LOC649661     | 0.021961264  | 6.814543071 | 0.530851682 |
| DECR1         | 0.038237741  | 12.21565559 | 0.530852595 |
| SLC35A3       | -0.023870335 | 7.383819042 | 0.530872502 |
| MDM1          | 0.01314844   | 6.206745655 | 0.530951578 |
| LOC651536     | -0.016776594 | 6.171772769 | 0.530974296 |
| STON1-GTF2A1L | 0.014794594  | 5.980937194 | 0.531098726 |
| LOC727942     | -0.016666686 | 5.998211687 | 0.5311615   |
| CCL22         | -0.021547333 | 5.917130734 | 0.531256132 |
| LOC642943     | 0.019532836  | 6.165858197 | 0.531286119 |

## DEG.infomation

|           |              |             |             |
|-----------|--------------|-------------|-------------|
| MMACHC    | -0.033083923 | 7.554634257 | 0.531287215 |
| KRTAP5-8  | -0.01650345  | 5.91663129  | 0.531293189 |
| SLC10A4   | -0.012588504 | 6.060618521 | 0.531297674 |
| GKN2      | -0.018140691 | 6.052452047 | 0.531315283 |
| LOC644946 | 0.012816012  | 6.049057692 | 0.53137931  |
| TSHZ2     | 0.035357657  | 7.024778586 | 0.531422448 |
| LOC731236 | -0.016300711 | 6.101186879 | 0.531499212 |
| AANAT     | -0.01593957  | 5.917709032 | 0.531551268 |
| POLI      | -0.018284272 | 6.019793467 | 0.531598429 |
| LOC653129 | -0.017108856 | 5.991638809 | 0.531657504 |
| PCDHGA2   | -0.011446459 | 5.997782538 | 0.531766363 |
| TACR2     | -0.016883114 | 6.079749405 | 0.53180223  |
| MAGEA8    | -0.012917942 | 6.080439849 | 0.53187196  |
| COX5B     | 0.037154989  | 13.90639196 | 0.531918907 |
| AMIGO3    | 0.01675546   | 6.214336131 | 0.53193042  |
| LOC730050 | -0.023561938 | 6.402134671 | 0.53197485  |
| SMC1B     | 0.017602224  | 6.153934118 | 0.532062528 |
| KIR3DL2   | 0.017674385  | 6.060929869 | 0.532102784 |
| SHOC2     | 0.04607665   | 7.377587756 | 0.532150829 |
| YJEFN3    | 0.018918725  | 6.182409822 | 0.532158813 |
| LOC401507 | 0.015791051  | 5.863126901 | 0.532456123 |
| CYTH1     | 0.029486157  | 7.409460899 | 0.532493742 |
| C10ORF64  | 0.019797774  | 6.157679622 | 0.532556333 |
| OR2D3     | 0.0168616    | 6.028574864 | 0.532606142 |
| LOC654133 | -0.015019395 | 6.048488894 | 0.532698929 |
| CACNG6    | 0.010797955  | 6.125273738 | 0.532727046 |
| LRRC26    | 0.017549959  | 6.130804159 | 0.532802587 |
| PAFAH1B1  | -0.046138555 | 9.595693797 | 0.532822782 |
| ASPHD2    | -0.016924339 | 6.145224909 | 0.532919125 |
| AGPAT5    | -0.026823789 | 6.530964172 | 0.53299617  |
| CYP4F11   | -0.021487125 | 6.172013109 | 0.53305507  |
| LOC728056 | 0.016470397  | 6.012822885 | 0.533258484 |
| HIST1H1B  | 0.013189429  | 6.001551513 | 0.533306235 |
| PLK4      | 0.017548893  | 6.333203337 | 0.53331619  |
| SPANXA1   | 0.0112478    | 5.993536434 | 0.53338465  |
| OR5H2     | 0.017899876  | 5.942185738 | 0.533429344 |
| LOC401286 | -0.01614616  | 6.082898815 | 0.533458376 |
| DFNB31    | 0.015973817  | 6.186111155 | 0.533539685 |
| LOC646914 | -0.01532983  | 5.974499074 | 0.533741762 |
| WDR53     | 0.021666119  | 6.714397292 | 0.533770241 |
| FLJ12334  | -0.017563922 | 5.999937709 | 0.534071401 |
| DAAM2     | 0.032325748  | 7.273620994 | 0.534173076 |
| LOC646154 | -0.015467421 | 6.112503234 | 0.534210778 |
| FLJ32214  | 0.017378046  | 5.955540348 | 0.534464304 |
| FLJ44060  | 0.014878399  | 6.010980121 | 0.534654239 |
| LOC647998 | -0.017299906 | 5.991717889 | 0.53470266  |
| ZNF410    | -0.025300324 | 7.697235086 | 0.534708382 |
| RNF133    | -0.014640437 | 6.080649245 | 0.534726976 |
| ASPEN     | -0.016515338 | 6.035603997 | 0.534939271 |
| PEG10     | -0.01176242  | 6.037328151 | 0.535033896 |
| LOC650795 | 0.017216398  | 6.071692834 | 0.535049672 |



## DEG.infomation

|           |              |             |             |
|-----------|--------------|-------------|-------------|
| HLA-DRB5  | 0.18085049   | 7.020385809 | 0.535073878 |
| API5      | 0.021282974  | 8.640567891 | 0.535111489 |
| SPDYC     | 0.016479128  | 6.176970485 | 0.535209945 |
| LOC644528 | -0.014422084 | 6.206537527 | 0.53522083  |
| MPZ       | 0.028513806  | 6.122629502 | 0.535353962 |
| CCIN      | -0.013847245 | 6.039569693 | 0.535392884 |
| TAGLN3    | 0.023702195  | 6.246741234 | 0.535588026 |
| LRRC56    | -0.018115159 | 6.132348048 | 0.535594617 |
| DOCK3     | 0.022177203  | 6.494086129 | 0.535658189 |
| SPRR1A    | -0.020959384 | 5.948294935 | 0.53570088  |
| MANBAL    | -0.022215084 | 8.285028916 | 0.535723427 |
| LOC644836 | 0.015923225  | 6.195676037 | 0.535855536 |
| LOC727820 | 0.018308431  | 6.591614751 | 0.535880908 |
| UCP1      | 0.014900043  | 6.087910205 | 0.535893258 |
| LOC644320 | -0.01370031  | 5.941443629 | 0.535952355 |
| DUSP8     | 0.041463243  | 7.466622066 | 0.535958633 |
| IQSEC3    | -0.012955766 | 6.174474666 | 0.535992249 |
| GPR81     | 0.012060402  | 6.030715172 | 0.536059067 |
| LOC645908 | -0.01719873  | 5.892865214 | 0.536069398 |
| LOC644809 | 0.016172576  | 6.162396278 | 0.536092052 |
| LOC653089 | 0.014994458  | 5.977388811 | 0.536286864 |
| OR5R1     | -0.016341653 | 6.100740023 | 0.536298695 |
| LOC654342 | 0.023349512  | 6.530427404 | 0.536339428 |
| PTPRH     | -0.024848705 | 6.334902983 | 0.536382773 |
| CEP97     | 0.016111413  | 5.906827683 | 0.536431048 |
| LOC388948 | 0.01415001   | 6.131158326 | 0.536512788 |
| CYTH3     | 0.019674006  | 7.34703269  | 0.536678301 |
| LOC651450 | 0.017853178  | 6.132196108 | 0.536752763 |
| FAM83A    | 0.010741098  | 5.974683075 | 0.536755335 |
| ZRANB1    | 0.041162076  | 7.977891922 | 0.536830212 |
| CNTD2     | -0.015017574 | 6.148065745 | 0.536969096 |
| VILL      | 0.017825894  | 6.307755887 | 0.537013295 |
| C10ORF30  | -0.018925018 | 6.089419269 | 0.537033714 |
| TAF13     | -0.021054984 | 6.521143674 | 0.537112122 |
| CABP4     | -0.014872388 | 6.059743368 | 0.537126293 |
| LHFPL4    | -0.016535782 | 6.088434357 | 0.537132087 |
| YWHAG     | -0.032950524 | 9.83741924  | 0.537147366 |
| SLC30A4   | 0.012074578  | 6.004206151 | 0.537234471 |
| C1ORF173  | -0.014528303 | 6.065436182 | 0.537265094 |
| ZNF257    | 0.013480371  | 5.971310426 | 0.537301394 |
| PFN2      | -0.036256288 | 7.878635624 | 0.537405495 |
| LOC649442 | 0.016882785  | 5.951938342 | 0.537465139 |
| LRRIQ4    | -0.019627988 | 5.917445362 | 0.537763791 |
| LOC147645 | 0.016991092  | 6.10763531  | 0.537841121 |
| STK16     | -0.014256779 | 6.226842294 | 0.537880016 |
| NPAS1     | -0.017847771 | 6.112886641 | 0.537905192 |
| C21ORF129 | 0.018609863  | 6.036662401 | 0.537906718 |
| EDG4      | 0.019061558  | 6.533299201 | 0.537984335 |
| LOC647264 | -0.011844098 | 6.032911865 | 0.537992619 |
| FBXO24    | -0.00930091  | 6.057188787 | 0.538052594 |
| HMGCLL1   | 0.008957562  | 6.088583734 | 0.538135019 |

## DEG.infomation

|            |              |             |             |
|------------|--------------|-------------|-------------|
| HLA-G      | 0.043475779  | 7.332215333 | 0.538160977 |
| LOC646720  | 0.014945361  | 5.990289197 | 0.538226712 |
| ATP6AP2    | -0.032427344 | 10.00507861 | 0.538241287 |
| GPX5       | 0.010441058  | 6.077792817 | 0.538523899 |
| TLR10      | -0.009779957 | 6.108771104 | 0.538546731 |
| LOC342900  | -0.010646826 | 6.047118655 | 0.538564538 |
| LOC645144  | -0.016026194 | 6.030017656 | 0.538590345 |
| N4BP3      | -0.017276107 | 6.091194196 | 0.538626764 |
| MRPL9      | -0.025213034 | 7.552255344 | 0.538720245 |
| C1ORF31    | -0.041417976 | 7.344075226 | 0.538745904 |
| KIAA0774   | -0.047624631 | 7.568992457 | 0.538865708 |
| PDZD3      | 0.018756715  | 5.968442007 | 0.538882024 |
| JARID1D    | 0.125185119  | 7.053736321 | 0.538917728 |
| BZRPL1     | -0.0152638   | 5.92287855  | 0.538934371 |
| SNORD116-4 | -0.018222829 | 5.919505448 | 0.53895395  |
| LOC440287  | 0.017463741  | 6.027856769 | 0.539023045 |
| FSD1       | 0.007337606  | 6.123766268 | 0.539048208 |
| ADRBK2     | -0.020086069 | 5.972734361 | 0.539084485 |
| UTS2R      | -0.016399753 | 6.099715129 | 0.539166001 |
| LOC391025  | -0.01537587  | 6.087342627 | 0.539238849 |
| LOC391209  | 0.015752954  | 6.027614554 | 0.539243297 |
| LOC653180  | -0.014967667 | 5.90771252  | 0.539253158 |
| RSAD2      | 0.051720488  | 6.860130743 | 0.539336589 |
| UTP23      | 0.019335264  | 6.962542715 | 0.539337878 |
| SCGB3A2    | 0.018486981  | 5.936221839 | 0.539360115 |
| LRRC57     | 0.019446053  | 6.966722124 | 0.53942473  |
| CGN        | -0.014885881 | 5.990222944 | 0.5394508   |
| LOC648211  | -0.015146046 | 6.17132936  | 0.539517182 |
| PCDHA2     | -0.011700313 | 6.055234631 | 0.539557089 |
| C4ORF28    | 0.018760935  | 6.061214452 | 0.539774389 |
| LOC646999  | 0.014937384  | 6.053953426 | 0.539789304 |
| MLLT1      | 0.017222824  | 6.162105767 | 0.53983446  |
| LOC649700  | 0.014967916  | 6.114315765 | 0.539920596 |
| LOC652707  | 0.016702154  | 6.157285029 | 0.539927135 |
| SNX31      | 0.018346858  | 6.243985826 | 0.540068066 |
| MYH8       | -0.015046366 | 6.033798024 | 0.540113693 |
| OR1L3      | 0.017786265  | 5.931243967 | 0.540193988 |
| FCRLA      | -0.019232222 | 6.128775019 | 0.540240239 |
| LOC653799  | 0.014370824  | 6.178200244 | 0.540246963 |
| IGF2BP2    | -0.037644745 | 8.297202054 | 0.540311879 |
| KLHDC8A    | 0.019799569  | 5.948368997 | 0.540323387 |
| BLOC1S1    | -0.050710461 | 9.22069785  | 0.540431139 |
| CYP1A1     | -0.035675174 | 6.185258749 | 0.54053394  |
| LOC651586  | 0.013916768  | 6.069957793 | 0.540574724 |
| EFHA1      | 0.033433996  | 10.63879859 | 0.540620026 |
| A26A1      | -0.012561534 | 6.064079419 | 0.540641678 |
| C11ORF2    | -0.030455583 | 10.68856804 | 0.540816414 |
| LOC645951  | -0.016575974 | 6.045817193 | 0.540924063 |
| LOC653468  | 0.009927332  | 6.171718427 | 0.540932288 |
| LOC649762  | -0.014045199 | 6.113843726 | 0.540978549 |
| SNORD26    | -0.015054929 | 6.029592198 | 0.540982863 |

## DEG.infomation

|           |              |             |             |
|-----------|--------------|-------------|-------------|
| SECTM1    | 0.023322102  | 6.174867561 | 0.54103317  |
| PAIP2B    | -0.017592644 | 6.133332847 | 0.541076384 |
| LOC645128 | -0.015918478 | 6.225682335 | 0.54107985  |
| PM20D1    | 0.020312554  | 6.21036297  | 0.541094921 |
| LOC642751 | -0.01384224  | 6.082422634 | 0.541699767 |
| LOC650549 | 0.014629691  | 6.110627682 | 0.541713933 |
| FLJ35880  | 0.01659553   | 6.134442813 | 0.54172226  |
| TFG       | -0.029305547 | 10.00660833 | 0.541834507 |
| C2ORF85   | 0.017235147  | 6.156688562 | 0.541880379 |
| CCL4L2    | -0.012879603 | 6.139693225 | 0.541922554 |
| TRMU      | -0.025477938 | 7.12851179  | 0.541925586 |
| C1ORF70   | 0.022596023  | 6.03274854  | 0.541956562 |
| LOC646320 | 0.014040669  | 6.050681557 | 0.541978691 |
| LOC645885 | 0.014304321  | 6.074480364 | 0.542016934 |
| CRX       | 0.018303439  | 6.275012522 | 0.542025364 |
| LOC647031 | 0.016112977  | 5.983428126 | 0.542100764 |
| FREM3     | 0.013627947  | 6.081587276 | 0.542101466 |
| LOC653441 | 0.009029163  | 6.011834741 | 0.542102846 |
| ABCC9     | 0.020381784  | 6.746283077 | 0.542166869 |
| LOC198437 | 0.017793752  | 5.915695638 | 0.542186796 |
| COL12A1   | -0.028527096 | 7.255128384 | 0.542290018 |
| ZNF776    | 0.021958711  | 6.643008008 | 0.542290284 |
| LOC643045 | 0.017672664  | 6.182991193 | 0.542344722 |
| DHX29     | -0.02405121  | 8.697663228 | 0.542372237 |
| LOC643692 | 0.013625779  | 6.05381788  | 0.54242867  |
| LOC643899 | 0.016489568  | 5.999929046 | 0.542443795 |
| OR5M11    | -0.015236214 | 5.99361322  | 0.542461952 |
| OR8G1     | -0.0130947   | 6.018662897 | 0.542465749 |
| LOC644484 | 0.015557393  | 5.895506527 | 0.542720578 |
| PRX       | 0.010893523  | 6.144675424 | 0.542794463 |
| LOC642615 | -0.016257044 | 6.284747071 | 0.54279897  |
| DPF2      | 0.020504614  | 9.11159844  | 0.54282685  |
| LOC647850 | 0.014293914  | 6.163678875 | 0.54293539  |
| LOC647046 | 0.013743735  | 5.999621037 | 0.543007049 |
| PRKAA1    | 0.02353285   | 8.252540043 | 0.543072008 |
| OAZ3      | 0.022572271  | 6.661681242 | 0.543216543 |
| LOC643906 | 0.015499959  | 5.931204374 | 0.543326126 |
| LOC286076 | -0.022194003 | 5.959436005 | 0.543392581 |
| TTBK2     | 0.016885716  | 6.159280953 | 0.543605915 |
| LOC654080 | -0.014292479 | 6.020701825 | 0.543649523 |
| PAGE3     | -0.015766072 | 6.094505501 | 0.543720204 |
| ZNF461    | -0.020355313 | 6.022424889 | 0.543765321 |
| LOC644200 | 0.015023448  | 6.05048839  | 0.543781924 |
| CCDC5     | 0.016481385  | 6.451296198 | 0.543810988 |
| LOC646139 | 0.016346636  | 6.018647074 | 0.543841158 |
| C2ORF51   | 0.015299412  | 5.944054677 | 0.543880824 |
| LOC653980 | 0.010213799  | 6.020184404 | 0.543957029 |
| OR4F3     | 0.016817917  | 6.12877761  | 0.54396448  |
| OR4C13    | -0.01519293  | 6.017164323 | 0.544058639 |
| MGC34800  | 0.012971106  | 6.045897331 | 0.544184889 |
| GSTZ1     | 0.019305428  | 6.714071826 | 0.544399234 |

## DEG.infomation

|           |              |             |             |
|-----------|--------------|-------------|-------------|
| LOC642231 | -0.014032916 | 5.920559188 | 0.544427949 |
| LOC653722 | 0.016809815  | 6.014622304 | 0.544523445 |
| SAP30BP   | -0.023150633 | 6.801511782 | 0.544570491 |
| C8A       | -0.015797699 | 5.959757403 | 0.544590037 |
| IGF1      | 0.029778611  | 6.580354562 | 0.54460468  |
| OR2C3     | -0.017783125 | 5.992244859 | 0.544717496 |
| GPR158    | 0.018776322  | 6.072727388 | 0.544794522 |
| GZMB      | -0.032230299 | 6.32805225  | 0.544890794 |
| FRAG1     | 0.037924796  | 8.425189384 | 0.544913172 |
| B4GALNT1  | 0.02498581   | 6.318675938 | 0.544921839 |
| LOC645118 | 0.016540162  | 6.175307132 | 0.544973753 |
| ESPNP     | 0.013877617  | 5.914583182 | 0.545039176 |
| LOC728441 | -0.016589748 | 6.005109517 | 0.545051825 |
| LOC652168 | -0.017353133 | 6.099443001 | 0.545064114 |
| C14ORF166 | 0.029268784  | 10.49314983 | 0.545066235 |
| LOC642765 | 0.014333869  | 6.247586713 | 0.545091043 |
| LOC641750 | -0.012074148 | 6.036868311 | 0.545113317 |
| LOC388882 | -0.01969132  | 6.068680753 | 0.545130437 |
| GKN1      | 0.015637296  | 6.057580097 | 0.545174334 |
| LOC642731 | -0.015966239 | 6.06441707  | 0.545242717 |
| CD1C      | -0.022410805 | 6.371955336 | 0.545451019 |
| LOXHD1    | 0.021211695  | 6.190836158 | 0.545538014 |
| LOC730184 | 0.015398655  | 6.314293543 | 0.545640374 |
| C9ORF50   | -0.016208696 | 6.036927296 | 0.545728539 |
| LOC650278 | 0.016445385  | 6.126492767 | 0.545931811 |
| GH2       | 0.008539309  | 6.03557862  | 0.545967756 |
| FAM75A3   | -0.013766208 | 6.038651654 | 0.545968598 |
| CAMKV     | 0.017132167  | 6.017490537 | 0.546002095 |
| TMEM41B   | 0.030150953  | 9.204987051 | 0.546063831 |
| TNKS2     | 0.022229123  | 6.058369417 | 0.54609078  |
| LOC730240 | 0.017554143  | 6.238885333 | 0.546149082 |
| LOC651208 | -0.013940988 | 5.98575428  | 0.546181534 |
| DPEP3     | -0.017093698 | 6.138042906 | 0.546358655 |
| TBC1D13   | -0.022624666 | 7.700286781 | 0.546364254 |
| IGLL3     | 0.014262597  | 6.106374526 | 0.546376226 |
| LOC645701 | 0.013964244  | 6.039595218 | 0.546445068 |
| E2F6      | -0.021605456 | 7.636285006 | 0.546487712 |
| WBP2NL    | -0.016046997 | 5.93073023  | 0.546586987 |
| HNRNPCL1  | 0.011206121  | 6.041544539 | 0.546594442 |
| MTPN      | -0.039505204 | 10.31957601 | 0.546621151 |
| LOC392232 | 0.01558652   | 6.055101643 | 0.546687741 |
| LOC653598 | 0.015712052  | 6.17562455  | 0.546687766 |
| FLJ32955  | -0.017160438 | 6.381972117 | 0.546703914 |
| LOC642960 | -0.015795583 | 6.428609528 | 0.546733197 |
| AGXT      | -0.016916911 | 6.114346878 | 0.546796739 |
| COPS7B    | 0.020228545  | 8.267774846 | 0.546838016 |
| LOC646762 | 0.021159261  | 6.070597609 | 0.546860408 |
| CYP11B1   | -0.012179332 | 5.914785181 | 0.546898073 |
| FLJ46321  | -0.010912697 | 6.07864333  | 0.546909985 |
| LOC644122 | 0.010670289  | 6.016192581 | 0.54698993  |
| ABHD9     | -0.016130653 | 6.287538411 | 0.547058648 |

## DEG.infomation

|           |              |             |             |
|-----------|--------------|-------------|-------------|
| KIAA0258  | -0.03361194  | 6.353617734 | 0.547225849 |
| DDX55     | -0.034585415 | 7.44756432  | 0.547281029 |
| MORF4     | 0.016381056  | 5.978860106 | 0.547306122 |
| LOC647171 | 0.012477888  | 6.116581485 | 0.547517898 |
| LOC642527 | -0.016395265 | 5.966820853 | 0.547741082 |
| LOC642830 | 0.016104474  | 6.013222147 | 0.547759653 |
| NFKBIL2   | -0.015776805 | 6.182074699 | 0.547845692 |
| MFGE8     | 0.030378166  | 13.29918216 | 0.548011073 |
| LOC199882 | -0.015773973 | 5.98499071  | 0.548022272 |
| PGAM1     | 0.04332401   | 9.336114596 | 0.548040434 |
| LOC388080 | 0.012314424  | 6.122697844 | 0.548068663 |
| C4ORF22   | -0.016802656 | 5.970052763 | 0.548073769 |
| OTP       | 0.011232914  | 6.228119551 | 0.548269835 |
| LOC651714 | -0.015506626 | 6.210540629 | 0.548424765 |
| ACTC1     | -0.037973533 | 13.89921021 | 0.548513978 |
| LOC646179 | -0.022370318 | 6.008771043 | 0.548522231 |
| LOC644491 | 0.015662097  | 6.329181239 | 0.548546617 |
| GPR32     | -0.016336277 | 6.025938315 | 0.548649828 |
| RABEPK    | -0.049721206 | 8.608525777 | 0.548730206 |
| LOC392262 | -0.013863203 | 5.997035041 | 0.548767457 |
| LOC644783 | 0.013306554  | 6.047983191 | 0.548799517 |
| ISLR2     | 0.031177658  | 6.738736084 | 0.548967653 |
| LOC644701 | 0.029547252  | 6.060940634 | 0.548969527 |
| VAMP4     | 0.023357456  | 6.95049175  | 0.549023678 |
| LOC152578 | 0.014892154  | 6.101477656 | 0.549029553 |
| WT1       | -0.01510622  | 6.352364378 | 0.54903982  |
| FLJ45079  | 0.016993339  | 6.105967395 | 0.549097005 |
| RNASEH2C  | -0.015786012 | 6.398114027 | 0.549126127 |
| SEMG2     | 0.015303843  | 5.862427853 | 0.5493234   |
| CHCHD10   | -0.026465302 | 13.21846499 | 0.549422452 |
| LOC643365 | -0.017442773 | 5.935840982 | 0.549427658 |
| AKIRIN2   | -0.034354869 | 9.12511092  | 0.549442459 |
| LOC653664 | 0.014839659  | 5.963714541 | 0.549452801 |
| LOC439965 | 0.017893326  | 5.896345974 | 0.549468607 |
| ASAH2B    | 0.010985744  | 6.214714787 | 0.549472452 |
| LOC654101 | 0.014175273  | 6.110156084 | 0.549492442 |
| PRAMEF4   | 0.011164583  | 6.037867124 | 0.549528462 |
| LOC644887 | 0.014808451  | 6.059687819 | 0.549561804 |
| TSPAN15   | 0.022027434  | 6.64732743  | 0.5495739   |
| PTPRV     | -0.015871275 | 6.032424982 | 0.549710613 |
| OR6N1     | 0.014936165  | 5.977374861 | 0.549735037 |
| LOC642692 | -0.015796467 | 6.254919392 | 0.549878835 |
| LOC647096 | -0.014655796 | 5.958291758 | 0.549967083 |
| LOC442512 | 0.015073732  | 6.076332935 | 0.550104463 |
| LOC440225 | 0.01202861   | 5.959415393 | 0.550108957 |
| OR6C68    | -0.015126566 | 5.901992998 | 0.55022269  |
| LAMB4     | 0.015988946  | 6.17097254  | 0.550247721 |
| LOC646307 | -0.014451021 | 6.09441654  | 0.550277929 |
| LOC643998 | 0.015634903  | 6.219806432 | 0.550357847 |
| ITLN2     | 0.017508714  | 6.129610248 | 0.550526854 |
| TMEM180   | -0.017383977 | 6.419132494 | 0.550604831 |

## DEG.infomation

|               |              |             |             |
|---------------|--------------|-------------|-------------|
| COTL1         | 0.028982278  | 6.023582436 | 0.550631659 |
| MYCL1         | 0.015554729  | 6.125634456 | 0.550638927 |
| C7ORF31       | -0.014993583 | 6.023667998 | 0.550788692 |
| GPR128        | 0.025119986  | 6.111010237 | 0.550804048 |
| INHBA         | 0.018084121  | 6.062900382 | 0.550851727 |
| CTCFL         | 0.014757691  | 5.979544647 | 0.550871732 |
| LOC642257     | 0.015435382  | 6.010045103 | 0.550977365 |
| THBS2         | 0.068022115  | 9.02997437  | 0.551130991 |
| LOC644255     | -0.014277422 | 5.993691515 | 0.551155391 |
| TMEM176A      | -0.062756688 | 7.879987686 | 0.551214741 |
| PAPSS1        | 0.027191025  | 7.413985199 | 0.551222278 |
| LUC7L         | -0.016920983 | 6.903368502 | 0.551244114 |
| MAGEA2        | -0.009768633 | 6.062300049 | 0.551297613 |
| FAM153C       | -0.010692867 | 6.0284495   | 0.551391478 |
| LOC648434     | 0.017826915  | 6.345922133 | 0.551452235 |
| C6ORF165      | 0.009156815  | 6.130855107 | 0.551476614 |
| CYP3A43       | 0.011875965  | 6.019272846 | 0.551578657 |
| LOC651112     | 0.019937951  | 6.140148237 | 0.551590211 |
| MCF2L         | 0.014720103  | 6.002763166 | 0.551675284 |
| AIM1          | -0.021164177 | 6.447588901 | 0.551693281 |
| ANGPTL3       | -0.01099181  | 6.035306752 | 0.551703832 |
| LOC647215     | 0.017022505  | 5.977510367 | 0.55174537  |
| PRKAG3        | -0.015827326 | 6.082957498 | 0.551875309 |
| LOC650965     | 0.014936679  | 5.979414038 | 0.551901133 |
| SLC18A1       | 0.012594287  | 6.289821997 | 0.55191543  |
| KRT37         | -0.018633261 | 6.106297623 | 0.552068365 |
| CENTB2        | -0.015599238 | 6.899141828 | 0.552200015 |
| FLJ43093      | -0.016646534 | 6.023169793 | 0.552228061 |
| VPRBP         | 0.021122227  | 6.753642106 | 0.55223218  |
| BAZ2A         | -0.015864501 | 6.218335881 | 0.55233139  |
| RINL          | -0.019368633 | 6.591246096 | 0.552436483 |
| SPRR2D        | 0.010309426  | 6.033444021 | 0.552438288 |
| LOC441016     | -0.015280909 | 6.302132051 | 0.552444363 |
| LOC647584     | -0.015001944 | 5.962644462 | 0.552580022 |
| LOC645730     | -0.01611384  | 5.943101148 | 0.552606153 |
| LOC442474     | -0.014462126 | 6.204049522 | 0.552663857 |
| FBN2          | -0.065714129 | 8.656944323 | 0.552682553 |
| LOC440687     | -0.014260185 | 5.890955513 | 0.552739583 |
| C9ORF37       | 0.029133342  | 6.881885585 | 0.552897205 |
| THADA         | -0.014330871 | 6.964107138 | 0.552993061 |
| LOC648405     | 0.014764734  | 6.228374509 | 0.553115513 |
| AQP1          | -0.04127428  | 7.250773633 | 0.553160648 |
| LOC649641     | -0.01759664  | 6.149924896 | 0.553197794 |
| LOC400858     | -0.01428862  | 6.036378403 | 0.553214497 |
| FTHL11        | -0.052656111 | 10.68608986 | 0.553402912 |
| LOC651842     | 0.014563029  | 6.112224683 | 0.553445012 |
| LOC648164     | 0.010748212  | 6.021650478 | 0.553479092 |
| LOC390669     | 0.016992734  | 6.086016673 | 0.553497743 |
| LOC641697     | 0.014735056  | 6.070832811 | 0.553525361 |
| KCNQ1         | -0.009925952 | 6.351819694 | 0.553772534 |
| DKFZP564N2472 | -0.016205639 | 6.099617679 | 0.553860588 |

## DEG.infomation

|           |              |             |             |
|-----------|--------------|-------------|-------------|
| LOC647246 | 0.014941886  | 6.045753247 | 0.553873454 |
| SLC35E2   | 0.015963031  | 6.196367223 | 0.553896238 |
| TRPV5     | 0.011635647  | 6.057739262 | 0.553924294 |
| FAM26C    | 0.022192308  | 6.975205941 | 0.553971956 |
| FLJ44290  | 0.011681621  | 6.10455633  | 0.553981589 |
| MAP2K7    | -0.019906035 | 7.037503262 | 0.554009218 |
| GRIN2B    | 0.023181837  | 5.980820816 | 0.554015137 |
| SPINK6    | -0.010523329 | 6.053563478 | 0.554039388 |
| C11ORF49  | 0.012613114  | 6.418679255 | 0.55405048  |
| MB        | 0.033127858  | 13.74810705 | 0.554071171 |
| LOC649212 | -0.016761209 | 6.030352832 | 0.554096548 |
| KCTD16    | 0.01602074   | 5.944245342 | 0.554123335 |
| LOC442446 | 0.015927301  | 5.997915203 | 0.554190731 |
| CDC20B    | -0.015434603 | 6.217023263 | 0.554205008 |
| RAB2B     | 0.027387477  | 9.740807057 | 0.554324521 |
| LOC441722 | 0.014599956  | 5.957046552 | 0.554433533 |
| KRT38     | -0.015815737 | 5.925019622 | 0.554535813 |
| LOC650429 | -0.015919047 | 6.074479673 | 0.554609813 |
| COX4I2    | 0.03253817   | 7.623604617 | 0.554649114 |
| IL13      | -0.017007737 | 5.857503013 | 0.554707822 |
| FLJ41481  | 0.023441037  | 6.102922183 | 0.554732554 |
| TNFRSF19  | -0.034347345 | 8.312088582 | 0.55477581  |
| ATAD4     | 0.022665169  | 7.418128711 | 0.554881378 |
| PNLIP     | 0.016194349  | 6.147193548 | 0.554910108 |
| ZNF74     | 0.014194794  | 6.489773562 | 0.554931218 |
| IYD       | -0.016338555 | 6.004657694 | 0.554934035 |
| LOC727937 | -0.014002396 | 6.213615411 | 0.555008392 |
| SPZ1      | -0.016440491 | 6.115993335 | 0.55511074  |
| TAT       | -0.013571075 | 6.038976145 | 0.555152099 |
| ENTHD1    | 0.02074301   | 6.007401216 | 0.555298096 |
| LOC645278 | -0.016374772 | 6.118953104 | 0.555405092 |
| LOC648878 | -0.014135348 | 6.121483132 | 0.555416056 |
| DIO3      | -0.021084116 | 6.127912698 | 0.555417623 |
| FTHL17    | 0.016186245  | 5.974276912 | 0.555522922 |
| ALDH1B1   | -0.031625181 | 6.835211185 | 0.555579638 |
| NFATC2IP  | 0.012091914  | 6.337291008 | 0.555606808 |
| LOC199897 | 0.02263758   | 6.037271849 | 0.555668304 |
| LY6G6C    | -0.025906929 | 6.0001057   | 0.555668942 |
| PRNP      | -0.016332559 | 7.098029403 | 0.555690471 |
| OR2AT4    | 0.016129457  | 6.017739732 | 0.555706225 |
| MEIS2     | -0.025073311 | 7.390144102 | 0.555853018 |
| ASAH2     | -0.009719693 | 6.121094546 | 0.555914077 |
| PKLR      | 0.008582698  | 6.098470004 | 0.555966821 |
| LOC646867 | 0.015370059  | 6.048188223 | 0.556025139 |
| OR2W5     | 0.016739822  | 6.476209029 | 0.556025215 |
| LOC392440 | 0.015329315  | 6.12273905  | 0.556084727 |
| CEACAM19  | -0.018183421 | 6.213589837 | 0.556130536 |
| NOS1AP    | 0.014410717  | 6.196470559 | 0.556158234 |
| LOC652813 | -0.01602858  | 6.038356444 | 0.556261843 |
| OR52N5    | -0.015730749 | 6.14648154  | 0.556270198 |
| SPATA8    | -0.017252623 | 6.169706849 | 0.556338103 |

## DEG.infomation

|           |              |             |             |
|-----------|--------------|-------------|-------------|
| PIP5K1B   | -0.020729356 | 6.772958107 | 0.55637308  |
| IGFBPL1   | 0.023546736  | 6.072150452 | 0.556402198 |
| SLC7A14   | 0.016313928  | 6.059822202 | 0.556406141 |
| DUSP15    | 0.011058709  | 6.085676913 | 0.556411728 |
| LOC642464 | -0.013960475 | 6.117938152 | 0.556470318 |
| GGTA1     | -0.016379275 | 6.14760072  | 0.556493428 |
| TEX2      | 0.024497096  | 9.690214276 | 0.556502853 |
| BEST2     | -0.018375269 | 5.949688372 | 0.556523246 |
| LOC652757 | -0.010952917 | 5.969710004 | 0.556583062 |
| DBF4      | -0.014593179 | 6.154904246 | 0.556596542 |
| NEUROG1   | 0.015174982  | 6.115144189 | 0.556632774 |
| GPR1      | -0.039724369 | 8.970310182 | 0.556695001 |
| PLXNB2    | 0.024715507  | 7.792359832 | 0.556701279 |
| LOC646237 | 0.015380004  | 6.018169757 | 0.556744853 |
| LOC648604 | 0.01549924   | 5.898884219 | 0.556776891 |
| LCA5L     | 0.016079206  | 6.200439887 | 0.556947131 |
| TMEM186   | 0.031571042  | 6.410626323 | 0.557091931 |
| LOC401398 | 0.02029886   | 5.925725539 | 0.557532076 |
| NFKBIE    | -0.016635251 | 6.451577855 | 0.557624258 |
| LOC650465 | -0.013633582 | 6.170218971 | 0.557711133 |
| OR10K1    | -0.015186753 | 6.009267734 | 0.558025703 |
| KIF25     | 0.014100285  | 6.515621736 | 0.558155006 |
| TAL1      | -0.02468844  | 6.152145385 | 0.558193423 |
| TAAR1     | -0.009990122 | 6.217543605 | 0.558297402 |
| CCDC64    | 0.014018588  | 6.038225136 | 0.558326664 |
| C5ORF20   | 0.016504183  | 6.242426429 | 0.558452736 |
| HHLA2     | -0.01624098  | 5.924904651 | 0.55866646  |
| LOC652747 | -0.014974046 | 5.993183637 | 0.558671887 |
| LOC650151 | 0.012692248  | 6.06178074  | 0.558709284 |
| PRRG3     | -0.014316134 | 6.170444914 | 0.55877611  |
| LOC645052 | -0.013500467 | 5.984483965 | 0.558780832 |
| DPEP1     | 0.014633361  | 6.074000415 | 0.558786741 |
| AKR1CL2   | 0.014889517  | 6.087649237 | 0.558831634 |
| OR2K2     | -0.016289931 | 5.93954759  | 0.558866907 |
| USP47     | 0.026367114  | 8.270913333 | 0.558929615 |
| NRG4      | -0.015184743 | 5.983235909 | 0.558934076 |
| LOC645652 | -0.013590149 | 5.994108041 | 0.558999356 |
| METAP1    | 0.027658373  | 10.37227526 | 0.559125127 |
| LOC643529 | -0.014462851 | 6.066610806 | 0.559159863 |
| WBSCR28   | 0.014646212  | 6.090091501 | 0.559186667 |
| SCN1B     | -0.031380422 | 7.148054446 | 0.559188477 |
| NDUFS8    | -0.026327625 | 12.7599795  | 0.559237897 |
| LOC401620 | 0.023894867  | 6.053438515 | 0.559294533 |
| KIAA0562  | 0.026056271  | 7.088687622 | 0.559368863 |
| LOC652547 | 0.013691378  | 6.193321489 | 0.559390036 |
| OR2G6     | -0.012664539 | 5.957311153 | 0.55940931  |
| TULP1     | -0.017482473 | 6.019361352 | 0.55942198  |
| LOC730996 | 0.025638598  | 6.629009064 | 0.55942946  |
| NPEPPS    | 0.017032886  | 7.435451521 | 0.559488511 |
| C3ORF22   | 0.014110931  | 6.222281329 | 0.559626264 |
| CKS2      | -0.037969974 | 7.092432731 | 0.559724509 |



## DEG.infomation

|           |              |             |             |
|-----------|--------------|-------------|-------------|
| OR2W1     | 0.016201597  | 5.818951693 | 0.559745736 |
| LOC644686 | 0.014383834  | 6.408514181 | 0.559899013 |
| LOC649185 | -0.014258151 | 6.032446681 | 0.559933377 |
| LOC651643 | 0.012474882  | 6.203429538 | 0.559948029 |
| ICHTHYIN  | -0.010852493 | 6.071811438 | 0.559980255 |
| MGC34821  | -0.015421526 | 6.033220597 | 0.560182688 |
| LOC647661 | 0.014845642  | 6.021073913 | 0.560370966 |
| TRDMT1    | 0.012636355  | 6.3391922   | 0.560567029 |
| ZC3H7B    | 0.019304337  | 6.197067562 | 0.560628718 |
| NTAN1     | -0.024825146 | 7.835276652 | 0.560776899 |
| LAPTM4B   | 0.038656316  | 11.94405095 | 0.560787234 |
| GAPDHS    | 0.00950417   | 5.962566986 | 0.56081665  |
| LOC646509 | -0.017050739 | 6.234486431 | 0.560913619 |
| OR14A16   | 0.016212612  | 5.957764307 | 0.560914418 |
| LOC647149 | -0.015728647 | 5.889681311 | 0.561020155 |
| LOC221091 | 0.015419157  | 6.100127551 | 0.561081818 |
| LOC644950 | -0.015021912 | 5.961029281 | 0.561092062 |
| OR4L1     | 0.010566755  | 6.111786179 | 0.56111755  |
| OTX2      | 0.007615801  | 6.126738629 | 0.561132102 |
| ZNF705D   | -0.008826541 | 6.159597933 | 0.561245316 |
| MTMR9     | 0.028292626  | 9.199832898 | 0.561362134 |
| RANBP17   | 0.012896844  | 6.029721546 | 0.561381858 |
| LOC647989 | 0.013500845  | 5.936753683 | 0.561383591 |
| LOC644473 | 0.013991948  | 6.181594984 | 0.56149747  |
| LOC646862 | -0.015082638 | 6.08013244  | 0.561835194 |
| LOC652741 | 0.019109792  | 5.9898771   | 0.561841525 |
| LOC651807 | 0.016868532  | 6.465002405 | 0.56192983  |
| LOC642037 | 0.01312579   | 6.060227868 | 0.561955466 |
| LOC642097 | 0.01877303   | 6.01835078  | 0.561972303 |
| DAB1      | 0.01498283   | 5.874666916 | 0.561983921 |
| KLK8      | 0.011430005  | 6.085480604 | 0.562170478 |
| TUBB1     | 0.016836094  | 6.135994788 | 0.562204333 |
| LOC642537 | -0.014207307 | 6.110387129 | 0.562586981 |
| LOC645238 | 0.015116732  | 6.019841436 | 0.562626458 |
| KLRC4     | 0.016408365  | 6.252138664 | 0.562651429 |
| MASP2     | 0.008458812  | 5.998934058 | 0.562687107 |
| LOC728656 | -0.014354956 | 6.196618625 | 0.562692263 |
| KLRC2     | 0.012309051  | 6.029890301 | 0.562886349 |
| XAGE-4    | 0.013007104  | 6.067077168 | 0.562890772 |
| LOC285423 | -0.010802013 | 6.139694416 | 0.562941203 |
| LOC642222 | -0.013449162 | 6.147846002 | 0.562975267 |
| HTR1E     | 0.018238121  | 6.490718334 | 0.563042385 |
| LOC648863 | -0.018853867 | 6.152938266 | 0.563044745 |
| LOC651096 | 0.012589169  | 6.020440852 | 0.563123197 |
| PDSS2     | -0.026285932 | 10.33953225 | 0.56314258  |
| LOC642405 | -0.017098668 | 6.0595761   | 0.563143766 |
| SUZ12     | 0.024814809  | 9.921945988 | 0.563215675 |
| THUMPD2   | 0.019214071  | 7.340801355 | 0.563238671 |
| FLJ44955  | -0.015494687 | 6.081945401 | 0.563394672 |
| LOC644856 | 0.013994079  | 6.037667912 | 0.563440701 |
| ZNF774    | 0.028027052  | 6.381032248 | 0.563466618 |

## DEG.infomation

|           |              |             |             |
|-----------|--------------|-------------|-------------|
| HOXA7     | -0.016810366 | 6.091604844 | 0.563490947 |
| LOC390243 | -0.011303162 | 5.991000544 | 0.563498515 |
| C16ORF73  | 0.01419193   | 6.076205665 | 0.563562577 |
| OR52A1    | 0.015957785  | 5.964849799 | 0.563721895 |
| LOC642974 | 0.013678904  | 5.927740016 | 0.563730973 |
| LOC645522 | -0.016360758 | 6.057711425 | 0.563786181 |
| SCUBE1    | -0.015904954 | 5.948273946 | 0.563845891 |
| RAB1B     | -0.018385501 | 7.296015099 | 0.563961532 |
| MRPS22    | 0.021656017  | 10.78543888 | 0.564043034 |
| RNF183    | 0.017655545  | 6.167854476 | 0.564050124 |
| DDX4      | -0.014969917 | 5.997690193 | 0.564056731 |
| FLJ44385  | 0.016099585  | 6.051629244 | 0.564060038 |
| KIAA0368  | -0.022442282 | 8.75785257  | 0.564068352 |
| LOC729966 | 0.01420301   | 6.086453908 | 0.564140806 |
| SLC9A11   | 0.011431814  | 6.032607161 | 0.564187447 |
| MIF       | -0.038366431 | 11.48018994 | 0.564198937 |
| LOC648568 | -0.014658315 | 6.054889064 | 0.564381213 |
| LCE2A     | 0.019553604  | 5.995104484 | 0.564544916 |
| LOC653983 | -0.015277378 | 6.118199244 | 0.564558231 |
| RLN3      | 0.019113256  | 6.446766062 | 0.564571542 |
| LOC390846 | -0.014276457 | 6.155210025 | 0.564581516 |
| SERPINA11 | 0.010268983  | 6.07327973  | 0.5646      |
| ARPM1     | -0.018050333 | 6.217406999 | 0.564695048 |
| DNAJC5B   | 0.014193351  | 5.889210224 | 0.564733485 |
| MAGEA12   | 0.012532612  | 6.226004041 | 0.564742401 |
| HISPPD1   | 0.014191288  | 6.010177664 | 0.56490067  |
| LOC646848 | -0.01550768  | 5.944924667 | 0.564913434 |
| A26B1     | 0.016245368  | 6.036981513 | 0.564914673 |
| LOC643948 | 0.016559477  | 5.998910263 | 0.565033936 |
| MPP7      | 0.015890304  | 6.336175579 | 0.565046569 |
| LOC645232 | -0.013403345 | 5.997920617 | 0.565181603 |
| RPL5      | -0.032541172 | 12.172336   | 0.565183149 |
| ZNF205    | -0.013527359 | 6.370878757 | 0.565211833 |
| ANKRD56   | 0.016594848  | 5.926020889 | 0.565216594 |
| RBM8A     | 0.017641764  | 6.286425864 | 0.565238461 |
| PPYR1     | 0.014409821  | 6.000908774 | 0.565245423 |
| LOC653211 | -0.012495418 | 6.161592965 | 0.56542217  |
| IBSP      | -0.016255494 | 6.224700001 | 0.565429934 |
| FLJ43879  | 0.013865449  | 6.234402883 | 0.565573951 |
| LOC648487 | 0.01309083   | 6.089197007 | 0.565588942 |
| BTBD8     | 0.009924761  | 6.009171046 | 0.565612894 |
| LOC133491 | -0.017292253 | 6.191892047 | 0.565620192 |
| LOC644934 | -0.03828146  | 10.60817059 | 0.565629517 |
| FAM84B    | -0.036152073 | 7.520154127 | 0.565630864 |
| LOC648256 | -0.012447306 | 6.290008559 | 0.565635402 |
| LRRC30    | -0.013185992 | 6.108265993 | 0.56579778  |
| TMEM168   | -0.021591606 | 7.327629911 | 0.565880334 |
| LOC644155 | -0.014689321 | 6.058042413 | 0.565938781 |
| LOC653620 | -0.021524981 | 5.990810208 | 0.566138728 |
| TAS2R5    | -0.016445174 | 6.130757586 | 0.566216747 |
| LOC652870 | 0.01364322   | 5.995044621 | 0.566336544 |

## DEG.infomation

|           |              |             |             |
|-----------|--------------|-------------|-------------|
| TOMM5     | 0.03712216   | 8.756130235 | 0.566361655 |
| ADRB2     | 0.03794684   | 7.810129323 | 0.566365274 |
| SP6       | 0.018873326  | 6.31761359  | 0.566419223 |
| NFKBID    | -0.015404266 | 6.239834598 | 0.566427793 |
| LOC646793 | -0.016603476 | 6.031528203 | 0.566460345 |
| MBNL2     | 0.041194192  | 9.073911772 | 0.566565991 |
| FTMT      | -0.014626937 | 5.989463833 | 0.56660946  |
| KLHL14    | 0.01101995   | 5.961918217 | 0.566617968 |
| PAX1      | 0.015251259  | 6.178381282 | 0.566645028 |
| LOC644063 | 0.044571635  | 7.613661593 | 0.566650762 |
| LOC643464 | -0.013671994 | 6.082121808 | 0.566687204 |
| LOC497190 | -0.013830909 | 6.145592411 | 0.56683836  |
| LOC442245 | -0.015244209 | 6.248840722 | 0.566886068 |
| HIST1H2BM | -0.017237839 | 6.182354293 | 0.566953828 |
| CYP4F22   | 0.014660187  | 5.93868774  | 0.567261479 |
| ARSH      | 0.012710247  | 6.016957887 | 0.567372123 |
| HNRNPA3   | -0.041653643 | 6.756903014 | 0.567372693 |
| WFDC10A   | -0.013996085 | 6.095161118 | 0.567487249 |
| DEFA5     | 0.014682712  | 6.047770829 | 0.567494954 |
| LOC651921 | 0.013689993  | 5.983973361 | 0.56760694  |
| ADAM18    | -0.014827678 | 6.038769523 | 0.567607663 |
| C1ORF27   | 0.017866888  | 6.146048544 | 0.567726833 |
| XAGE2     | 0.010893307  | 5.949237488 | 0.567794344 |
| LOC441632 | 0.015048409  | 6.223548483 | 0.5679196   |
| FLJ46109  | 0.010268521  | 5.951558641 | 0.567921469 |
| NUP43     | -0.027642095 | 8.458303853 | 0.567934607 |
| GPRC5A    | -0.015305517 | 6.073697361 | 0.567940139 |
| SLC27A2   | -0.015860755 | 6.165651448 | 0.567953835 |
| TBX22     | -0.01103077  | 6.22334714  | 0.56796137  |
| CCDC16    | 0.020756402  | 7.908675654 | 0.568094096 |
| OR2B11    | 0.013711865  | 6.019933112 | 0.568172189 |
| LOC652286 | 0.014241483  | 6.12173167  | 0.568199067 |
| OR13C2    | -0.015252416 | 6.002984603 | 0.568263713 |
| TSKS      | 0.013500387  | 6.048248401 | 0.568285387 |
| RASL10A   | -0.020960969 | 6.51137498  | 0.568335594 |
| LOC647946 | 0.009923129  | 6.037272581 | 0.56836792  |
| LOC645138 | 0.044843953  | 11.26257482 | 0.568479353 |
| ARGFXP2   | -0.010086519 | 6.00596689  | 0.568531597 |
| UGT2B15   | -0.009975635 | 5.961605215 | 0.568551611 |
| LOC129870 | -0.013118869 | 6.03405602  | 0.568569475 |
| WBSCR23   | -0.018906475 | 5.928328178 | 0.568702664 |
| LOC650118 | 0.01245036   | 6.016816974 | 0.568793665 |
| FLJ42953  | -0.013680118 | 6.05114007  | 0.56882169  |
| SCEL      | -0.009841244 | 6.092979158 | 0.568989217 |
| OR8B3     | 0.014418802  | 5.948242441 | 0.569036004 |
| HSDL1     | -0.0260427   | 7.558945344 | 0.569096981 |
| EIF4G3    | 0.027932996  | 8.495534032 | 0.56912278  |
| SNORD42B  | -0.01390589  | 6.10535925  | 0.569138086 |
| COL1A2    | 0.070173768  | 9.99797938  | 0.56919381  |
| LOC652802 | -0.01559697  | 6.009514296 | 0.569200666 |
| PPP1R1B   | 0.010945207  | 6.2132889   | 0.569433968 |

## DEG.infomation

|           |              |             |             |
|-----------|--------------|-------------|-------------|
| SEMG1     | -0.016359671 | 6.464346811 | 0.56962648  |
| LOC650862 | -0.015744401 | 5.968585601 | 0.569650517 |
| KRT83     | -0.014900772 | 6.277977479 | 0.569675482 |
| PRKAG2    | -0.030339815 | 9.001818762 | 0.569736724 |
| SLC26A10  | -0.015950125 | 6.275858394 | 0.569766233 |
| KLHL31    | -0.019470041 | 6.087322808 | 0.569787914 |
| MINK1     | -0.016107772 | 6.003465746 | 0.569813117 |
| HIVEP3    | -0.015331088 | 6.094959599 | 0.569831464 |
| UGT1A1    | 0.015111998  | 6.031785314 | 0.569932766 |
| DNM3      | 0.017272945  | 6.261885632 | 0.570069905 |
| ZSCAN29   | 0.014955413  | 6.247609321 | 0.570100673 |
| LOC641914 | -0.01393472  | 6.050262967 | 0.570275097 |
| LOC643583 | -0.015443003 | 6.023444627 | 0.570343092 |
| HIST1H2AM | -0.015026705 | 6.037944943 | 0.570345639 |
| LOC641972 | -0.018759841 | 6.143986365 | 0.570437538 |
| LOC650276 | -0.024313226 | 13.44070924 | 0.570484448 |
| NGB       | 0.023764706  | 7.072494579 | 0.570560198 |
| LOC731992 | 0.013400218  | 6.115089517 | 0.570578528 |
| RAP1GDS1  | 0.017166408  | 6.922639144 | 0.57063481  |
| FOXL1     | -0.014079001 | 6.086184712 | 0.570711963 |
| RAB21     | 0.042538364  | 10.2798808  | 0.570740491 |
| TNK1      | -0.015662945 | 5.974241959 | 0.57085038  |
| LOC653526 | -0.014679827 | 6.066842831 | 0.570895623 |
| AZI1      | 0.022262882  | 7.658770978 | 0.570931568 |
| ATP1A4    | 0.010612683  | 6.044860368 | 0.571049541 |
| G6PC2     | -0.009056179 | 6.025151607 | 0.571137927 |
| LOC729766 | -0.016449594 | 6.037598471 | 0.571173953 |
| CES7      | -0.015594895 | 6.166198924 | 0.571175673 |
| IFNE1     | -0.009894871 | 6.043964755 | 0.57121308  |
| LOC652401 | -0.013794478 | 6.086583207 | 0.57121571  |
| OR56B1    | 0.020771476  | 6.069607911 | 0.571830666 |
| LOC441743 | 0.025438966  | 6.762034083 | 0.571988304 |
| HTN1      | -0.017326954 | 5.835539591 | 0.57202207  |
| LOC654147 | 0.017338292  | 6.256467246 | 0.57205765  |
| KRTAP12-4 | -0.013511219 | 6.118339905 | 0.572063708 |
| C17ORF55  | -0.015432618 | 6.146598292 | 0.572308194 |
| MANEAL    | 0.008667084  | 6.000052564 | 0.572324705 |
| LOC442299 | -0.014581908 | 6.024516584 | 0.572332909 |
| PTPRCAP   | 0.016286403  | 6.375451971 | 0.572382202 |
| NBPF15    | 0.008837924  | 6.003943721 | 0.572403017 |
| LOC652463 | -0.01378777  | 6.080456532 | 0.572535637 |
| CLEC4E    | 0.015772763  | 6.167815166 | 0.572623482 |
| CCDC46    | 0.016580925  | 7.025888857 | 0.572714256 |
| TRAIP     | 0.01887909   | 6.404817188 | 0.572718475 |
| LOC653472 | -0.015715264 | 6.037336861 | 0.573102128 |
| LOC647537 | 0.012978511  | 6.024063374 | 0.573232154 |
| ACY1      | -0.025577759 | 7.990419689 | 0.573256832 |
| COP1      | 0.011655437  | 6.187412196 | 0.573266298 |
| KLK13     | -0.014113315 | 5.888296949 | 0.573295236 |
| POU2F3    | 0.010137279  | 6.068101465 | 0.573370059 |
| LOC643547 | -0.016200176 | 5.938860425 | 0.573511326 |

## DEG.infomation

|           |              |             |             |
|-----------|--------------|-------------|-------------|
| KLF8      | -0.021146691 | 6.810454772 | 0.573577771 |
| WDR65     | -0.020999806 | 6.064582197 | 0.573798751 |
| LOC651860 | -0.014197076 | 5.993101349 | 0.573847304 |
| ZPBP2     | -0.008811444 | 5.978313331 | 0.573882382 |
| LOC647499 | 0.015072912  | 6.024893884 | 0.573899016 |
| GPR62     | 0.01520123   | 5.92383821  | 0.574155112 |
| TGM4      | 0.015618898  | 5.979650546 | 0.574246661 |
| SLC16A2   | 0.019212513  | 6.909193369 | 0.574273448 |
| LOC653883 | 0.013998938  | 5.999169601 | 0.574333218 |
| DPCR1     | -0.01878604  | 6.056911878 | 0.574362571 |
| DEFB106B  | -0.015284337 | 6.194183741 | 0.574523834 |
| LOC651868 | 0.012227561  | 6.102580802 | 0.574527573 |
| C20ORF112 | -0.017233391 | 5.970482888 | 0.574595209 |
| LOC641846 | -0.012258641 | 5.945471479 | 0.574676471 |
| LOC654091 | -0.016522298 | 5.825795122 | 0.574682392 |
| PCDHGA7   | 0.010413397  | 5.95766377  | 0.574695316 |
| LOC644732 | 0.016015427  | 5.963805293 | 0.574782872 |
| FAM102B   | -0.028313235 | 7.034437849 | 0.574814515 |
| FAM82B    | -0.015737783 | 6.311699874 | 0.574840687 |
| LOC643637 | 0.012926628  | 6.051514552 | 0.574933672 |
| PDHA2     | 0.012244561  | 6.079895695 | 0.574948853 |
| CNTN1     | 0.011922222  | 5.985216918 | 0.574954005 |
| SLC25A3   | 0.024425178  | 12.61446785 | 0.574975345 |
| KIAA1276  | 0.017945428  | 6.537108308 | 0.575023444 |
| TMEM179   | 0.011957852  | 6.069126096 | 0.575050541 |
| C6ORF168  | -0.015010636 | 6.113798104 | 0.575098835 |
| NDUFS4    | 0.036075687  | 11.84085246 | 0.575183452 |
| LOC653567 | 0.018088691  | 6.609319903 | 0.575253365 |
| BANP      | -0.023211359 | 8.669435737 | 0.575477513 |
| LOC341346 | -0.011927641 | 6.091134923 | 0.575485804 |
| LOC642047 | -0.016518944 | 6.237011362 | 0.575489162 |
| WASL      | 0.026769915  | 9.694446658 | 0.57549965  |
| LOC220115 | 0.009164229  | 6.093376586 | 0.575576271 |
| LOC650631 | 0.013290709  | 6.039498803 | 0.575618042 |
| SFTPC     | -0.019844004 | 6.097145325 | 0.575660862 |
| LOC643986 | -0.014313267 | 6.287117529 | 0.575689517 |
| LOC651552 | 0.016016348  | 6.043163718 | 0.575711111 |
| CRH       | -0.018647405 | 6.509062373 | 0.575845096 |
| C2ORF79   | 0.021539333  | 7.76381373  | 0.576106111 |
| LOC649103 | 0.013491415  | 5.948314135 | 0.576130334 |
| LOC651022 | 0.014378039  | 5.940422818 | 0.576148935 |
| LOC651493 | -0.013128062 | 6.084128857 | 0.576183155 |
| PROK1     | -0.017726174 | 6.046194137 | 0.576191646 |
| ATP5EP2   | 0.025062928  | 13.69574759 | 0.576232498 |
| LOC643322 | 0.012657622  | 6.097793457 | 0.576251265 |
| CLCA3     | 0.016474737  | 6.024011695 | 0.576274368 |
| DUSP4     | -0.010133115 | 5.999362135 | 0.576449937 |
| PAG1      | 0.024150676  | 7.352551313 | 0.576454203 |
| SMA5      | 0.014444079  | 6.235229724 | 0.576492748 |
| EPYC      | -0.014753678 | 6.015944416 | 0.576515428 |
| OR4A5     | 0.01448585   | 5.916247554 | 0.576644775 |

## DEG.infomation

|           |              |             |             |
|-----------|--------------|-------------|-------------|
| MRGPRX3   | -0.01373945  | 6.259414232 | 0.576787925 |
| PGP       | 0.020245664  | 6.982812322 | 0.57692747  |
| CCT6P1    | -0.026139483 | 7.859603725 | 0.576963425 |
| NOG       | 0.013025925  | 6.03912265  | 0.576989372 |
| FAM110C   | 0.012924864  | 6.065170486 | 0.577125778 |
| LOC648287 | -0.012330529 | 6.202883716 | 0.577176752 |
| LOC644197 | 0.012779288  | 6.237964578 | 0.577217101 |
| PUSL1     | 0.017637036  | 6.699001466 | 0.577227203 |
| LOC649160 | -0.014495048 | 6.137388466 | 0.577299136 |
| ANXA3     | -0.042787828 | 7.091019267 | 0.577301926 |
| CGB2      | 0.01585999   | 5.943878741 | 0.577349385 |
| PRSS33    | 0.01178657   | 5.972215843 | 0.577355195 |
| FAM19A1   | -0.015446893 | 5.963110291 | 0.577368423 |
| LOC642173 | 0.012944325  | 6.068109412 | 0.577449082 |
| GUCY1B3   | 0.023909276  | 6.895100769 | 0.577488572 |
| HNRNPA1   | 0.027855445  | 6.829000719 | 0.577578531 |
| LOC649524 | -0.01619701  | 5.998978278 | 0.57762593  |
| LOC153328 | 0.012704421  | 6.345089703 | 0.577641443 |
| LOC399815 | 0.011397726  | 6.088278264 | 0.57764251  |
| IL1A      | -0.013307717 | 6.030481557 | 0.577654142 |
| C15ORF53  | -0.013882003 | 5.953683013 | 0.5776827   |
| PIK3C2A   | 0.024161877  | 6.462985965 | 0.577774771 |
| FLJ10374  | -0.038388889 | 6.465636128 | 0.577813634 |
| LOC648682 | 0.014092551  | 6.105231292 | 0.57788597  |
| TIMM9     | 0.034936745  | 7.698815638 | 0.577938486 |
| CHRM1     | 0.017787142  | 5.910451712 | 0.577950879 |
| CST5      | 0.014120595  | 6.036012717 | 0.577953089 |
| LOC442208 | -0.013864483 | 6.077408645 | 0.578153398 |
| MEIS3P1   | -0.027088886 | 8.306075318 | 0.57825362  |
| PLCH1     | 0.015702864  | 6.075823066 | 0.578427291 |
| SH3BP5    | 0.009284653  | 6.078513446 | 0.578493555 |
| TCL6      | 0.008488897  | 6.107283158 | 0.578806816 |
| SFTA2     | 0.014631182  | 6.361436861 | 0.578899145 |
| EN2       | -0.018503251 | 5.992141935 | 0.578909742 |
| LOC643227 | 0.013165151  | 5.981924278 | 0.579011819 |
| LOC647706 | -0.014025343 | 5.953313768 | 0.579057854 |
| LOC641851 | -0.015005285 | 6.106815588 | 0.579087167 |
| LOC400948 | 0.047590665  | 10.00631642 | 0.579124576 |
| TAOK3     | -0.016499225 | 5.953468431 | 0.579265561 |
| ESPN      | 0.014442965  | 6.12114753  | 0.579408726 |
| C9ORF4    | 0.016643965  | 6.156216525 | 0.579433376 |
| LOC728973 | -0.057586947 | 10.42828642 | 0.579448563 |
| LOC400590 | -0.01300253  | 6.16419656  | 0.579452065 |
| LOC653527 | 0.016658527  | 5.848670559 | 0.579608963 |
| ZNF793    | -0.012896239 | 6.039974084 | 0.579672584 |
| LOC642344 | 0.013396179  | 6.058432571 | 0.579714003 |
| ZNF354C   | 0.010462915  | 5.958433356 | 0.579839582 |
| LOC652259 | -0.01426132  | 6.151925382 | 0.579861821 |
| LOC644773 | -0.013060626 | 5.972309994 | 0.57999513  |
| SALL4     | -0.012221023 | 5.951845945 | 0.580058791 |
| NWD1      | -0.014928266 | 5.992926842 | 0.580068215 |

## DEG.infomation

|           |              |             |             |
|-----------|--------------|-------------|-------------|
| GPRC5D    | -0.01387954  | 6.008579727 | 0.58006862  |
| PPM1L     | -0.014537498 | 6.120793662 | 0.58015705  |
| SSX3      | 0.00836176   | 6.100701795 | 0.580207277 |
| KLHL17    | -0.013184661 | 6.218693816 | 0.580269935 |
| LOC650849 | 0.014175104  | 6.102005757 | 0.580434794 |
| LOC340096 | 0.013074825  | 6.059568165 | 0.580526834 |
| LASS3     | -0.014996734 | 5.99011598  | 0.58052696  |
| HIST1H4G  | -0.015351566 | 5.963974047 | 0.580559255 |
| DDX58     | 0.031076986  | 6.694308894 | 0.580565898 |
| KIAA1467  | -0.021016751 | 6.408964317 | 0.58059734  |
| EGFR      | -0.008333536 | 6.234080415 | 0.580612243 |
| DEFB129   | -0.015630076 | 6.107998824 | 0.580620007 |
| MGC39545  | 0.014952256  | 6.074471639 | 0.580652123 |
| LOC653100 | 0.014095345  | 6.189549856 | 0.580705513 |
| LOC728739 | -0.023424978 | 7.698001294 | 0.580741263 |
| PFTK2     | 0.010566902  | 6.07015803  | 0.580793818 |
| CUX1      | 0.011987681  | 6.189965486 | 0.580814612 |
| LOC648876 | 0.024376208  | 5.988129086 | 0.580910919 |
| SYCP1     | -0.010559801 | 5.990483237 | 0.580933269 |
| LOC643496 | 0.014351039  | 5.921505234 | 0.580968113 |
| LOC387870 | 0.012591669  | 6.127755334 | 0.580981097 |
| SHF       | 0.010145359  | 6.174103784 | 0.581020574 |
| LOC221136 | -0.012772274 | 6.151670022 | 0.581099321 |
| LOC442423 | 0.014772292  | 5.910778184 | 0.581154098 |
| LOC644694 | -0.016397719 | 6.542199287 | 0.581170619 |
| LOC652417 | 0.012298404  | 6.224656178 | 0.581236292 |
| AIM2      | -0.010316682 | 6.10373394  | 0.581293214 |
| C6ORF15   | 0.013783241  | 6.037747678 | 0.581422171 |
| LOC441032 | 0.014026763  | 6.124918771 | 0.581504665 |
| FSCN3     | -0.013874688 | 6.062796309 | 0.581656867 |
| C4ORF33   | 0.022849797  | 6.77778127  | 0.581672179 |
| LOC645038 | 0.012517049  | 6.072729035 | 0.581672951 |
| LOC652602 | -0.013193959 | 6.106629372 | 0.581738355 |
| BARX1     | -0.015704183 | 6.111460455 | 0.581863593 |
| OR51G1    | 0.014974307  | 5.944985787 | 0.581957478 |
| TIGD3     | 0.019267108  | 6.006665549 | 0.581968311 |
| LOC389105 | -0.013122367 | 5.950636099 | 0.581976349 |
| MARLIN1   | -0.008904239 | 6.174220736 | 0.582129905 |
| FLJ46026  | -0.015708513 | 5.931741342 | 0.582135411 |
| GJB7      | 0.015307715  | 6.023544474 | 0.582229045 |
| LOC652354 | -0.016955469 | 6.150053792 | 0.582252491 |
| LOC651789 | -0.015947603 | 5.943835433 | 0.58229206  |
| LOC649967 | -0.013797432 | 6.071320052 | 0.582393172 |
| LOC339799 | -0.014682522 | 5.90052604  | 0.582397276 |
| FAM101A   | 0.018956372  | 6.054994254 | 0.582444887 |
| TNFRSF13B | 0.013719715  | 6.041374992 | 0.582463815 |
| LOC644402 | 0.013592266  | 6.022746037 | 0.582465434 |
| KLK7      | -0.011957235 | 6.278008099 | 0.582483283 |
| RCAN3     | -0.013060594 | 6.15853783  | 0.582518489 |
| FLJ36848  | -0.022893412 | 6.242900574 | 0.582534753 |
| LOC645882 | 0.013952688  | 6.072004645 | 0.582668056 |

## DEG.infomation

|           |              |             |             |
|-----------|--------------|-------------|-------------|
| LOC652424 | 0.013685142  | 6.235162673 | 0.58270364  |
| SUFU      | 0.02227207   | 6.072918896 | 0.582828609 |
| LOC339778 | 0.013556961  | 6.165222593 | 0.582939656 |
| LIMK1     | -0.011300467 | 6.049361135 | 0.58313606  |
| LOC649527 | 0.010427634  | 5.98681693  | 0.583162196 |
| TTY9A     | 0.014531762  | 5.994837788 | 0.583279216 |
| LOC650159 | -0.013312754 | 6.037705138 | 0.58330509  |
| RPS29     | -0.02128482  | 13.38616836 | 0.583344486 |
| C1QL2     | 0.017841304  | 6.244114367 | 0.583364045 |
| LOC652876 | 0.013322486  | 6.138600309 | 0.583406079 |
| TRIM65    | 0.01600905   | 6.390222498 | 0.583413084 |
| PRAME     | -0.00967083  | 6.389892033 | 0.583523312 |
| OXT       | -0.015005287 | 6.0689327   | 0.583639294 |
| ZFP57     | 0.029049466  | 6.593310005 | 0.583641045 |
| UGT2B11   | -0.035059599 | 6.400930316 | 0.583643723 |
| ABHD8     | 0.024429816  | 8.414383613 | 0.583693811 |
| LOC645837 | 0.026308312  | 6.069656076 | 0.58372758  |
| MAP3K7IP1 | 0.010037096  | 6.39386219  | 0.583817602 |
| RIMBP2    | 0.014050096  | 6.070011195 | 0.583839588 |
| CYB5B     | -0.020711501 | 10.59535502 | 0.583897234 |
| NEFL      | 0.015219553  | 6.142947769 | 0.58394257  |
| LOC642673 | -0.011794363 | 6.123111408 | 0.584082353 |
| PSG8      | 0.0151877    | 6.098398386 | 0.584123695 |
| LOC650418 | 0.011986052  | 6.138322282 | 0.584180197 |
| SPATA9    | 0.011256669  | 6.107114288 | 0.584190003 |
| LOC648626 | 0.018711177  | 6.135830708 | 0.584227804 |
| BCORL2    | -0.012974599 | 5.93326853  | 0.584268473 |
| LOC649264 | -0.01311985  | 5.971481952 | 0.584279096 |
| NBPF4     | -0.013626642 | 5.882934598 | 0.584437346 |
| PDZK1IP1  | 0.015562197  | 5.940620517 | 0.584447866 |
| LOC342918 | -0.015397539 | 5.948761336 | 0.584479803 |
| LOC652156 | -0.01403189  | 6.014148071 | 0.584540832 |
| LOC642883 | -0.01587515  | 6.006593629 | 0.584646867 |
| CASR      | -0.013569143 | 5.993457224 | 0.584650408 |
| C10ORF109 | 0.015598524  | 5.998100515 | 0.584666917 |
| ZDHHC20   | -0.01246837  | 6.119242369 | 0.584716542 |
| LOC730805 | 0.012463243  | 6.085796208 | 0.58473705  |
| DEFB4     | 0.016341122  | 5.962218298 | 0.584749224 |
| IDUA      | 0.022385298  | 6.871773908 | 0.584786709 |
| HPCA      | -0.013944791 | 6.041607161 | 0.584806324 |
| KCTD6     | 0.023986983  | 7.838998229 | 0.584975744 |
| LOC260340 | -0.013751646 | 5.981849343 | 0.584988751 |
| LOC653600 | -0.0128875   | 6.105494033 | 0.585014068 |
| LOC732007 | 0.041591496  | 9.183558143 | 0.58508103  |
| TTR       | -0.017993151 | 6.341852604 | 0.58516769  |
| MRPL17    | 0.023755134  | 10.12917246 | 0.585295633 |
| NDE1      | 0.024201289  | 8.007051993 | 0.585386976 |
| LOC340602 | 0.012860577  | 5.965847384 | 0.585396836 |
| HSP90AB1  | 0.030373126  | 12.05916039 | 0.585415314 |
| NPY1R     | -0.015379298 | 6.049691985 | 0.585494638 |
| CCDC13    | -0.009599675 | 6.124947689 | 0.585853851 |



## DEG.infomation

|           |              |             |             |
|-----------|--------------|-------------|-------------|
| LOC284288 | 0.013099346  | 6.022697086 | 0.585917058 |
| OR5P3     | 0.009581197  | 6.012711742 | 0.586023858 |
| LOC92497  | -0.013425129 | 6.236250561 | 0.586201528 |
| ZNF37A    | -0.01243094  | 6.162677015 | 0.586205516 |
| LOC652688 | -0.013720408 | 6.065681826 | 0.586308058 |
| SALL3     | 0.029632528  | 7.98165236  | 0.586357729 |
| SLC22A6   | -0.010232455 | 6.096734032 | 0.586439782 |
| NPFFR1    | -0.016018335 | 6.037963424 | 0.586490713 |
| CCDC26    | 0.014032046  | 6.058477946 | 0.586616473 |
| XIST      | 0.119914947  | 7.381035876 | 0.58672688  |
| LOC649952 | 0.020649187  | 5.921145245 | 0.586764062 |
| FLJ20712  | -0.014237334 | 6.186049362 | 0.587019595 |
| LOC647371 | 0.013781053  | 5.991868182 | 0.587041332 |
| LOC644327 | 0.012765874  | 6.061334697 | 0.58704551  |
| TXNDC10   | -0.020735879 | 7.54113432  | 0.587108954 |
| KCNH8     | 0.014409022  | 6.378484981 | 0.587165729 |
| TAC4      | 0.010067135  | 6.094162705 | 0.587242329 |
| CABIN1    | 0.023898461  | 7.145450649 | 0.587281313 |
| PRSS22    | 0.016799021  | 6.093035136 | 0.587415946 |
| GPR110    | -0.007202295 | 6.019374796 | 0.587421651 |
| LOC651741 | -0.013118196 | 6.207728735 | 0.587443426 |
| C22ORF15  | -0.016169857 | 6.241573806 | 0.587515195 |
| C3ORF35   | -0.007131582 | 6.055399898 | 0.587521019 |
| PPAP2B    | -0.039621363 | 9.855049608 | 0.587563066 |
| LOC644813 | 0.014082525  | 6.031107553 | 0.587800347 |
| LOC644613 | 0.018831707  | 5.928114825 | 0.588068459 |
| DERA      | 0.029218767  | 10.39553092 | 0.588082522 |
| LOC652317 | -0.012292026 | 6.095801905 | 0.588152801 |
| C1ORF9    | -0.017722715 | 6.164299139 | 0.588177472 |
| LOC654206 | -0.01409801  | 5.911506943 | 0.588235185 |
| LOC728946 | 0.009364707  | 5.99026576  | 0.588270245 |
| C4ORF26   | 0.015771222  | 5.983998343 | 0.588315134 |
| FLJ30719  | 0.016795267  | 5.967155401 | 0.588473902 |
| OR52E2    | 0.014645781  | 5.925873615 | 0.588576658 |
| PAPD5     | 0.032984891  | 7.709085104 | 0.588705699 |
| LOC644330 | 0.026508197  | 6.742260007 | 0.588784897 |
| PIGS      | 0.032159176  | 7.822615476 | 0.588793316 |
| LOC642341 | -0.017901446 | 6.099058811 | 0.589032514 |
| KIAA1257  | 0.010872937  | 6.096215921 | 0.589046689 |
| LOC642451 | -0.014016889 | 6.188037489 | 0.589098795 |
| NDUFS6    | -0.01479485  | 5.991904535 | 0.589243634 |
| LOC653154 | 0.013416994  | 6.047307206 | 0.589244725 |
| RGS22     | -0.015648245 | 6.02649838  | 0.589378988 |
| FEZF1     | -0.01285027  | 5.978723476 | 0.589384582 |
| FER1L5    | -0.012387292 | 6.243909467 | 0.589386795 |
| LOC653244 | -0.010487661 | 6.001551669 | 0.589415899 |
| LOC150356 | -0.028520248 | 6.46154102  | 0.589448174 |
| ZNRF3     | 0.019723844  | 6.739781822 | 0.58949206  |
| TREX1     | 0.009219454  | 6.189484134 | 0.589575683 |
| GPR85     | 0.016217102  | 5.988189075 | 0.589680671 |
| TSNARE1   | -0.013706224 | 6.163464441 | 0.589724182 |

## DEG.infomation

|           |              |             |             |
|-----------|--------------|-------------|-------------|
| LOC389730 | 0.011656026  | 6.092350144 | 0.589772031 |
| CXORF55   | 0.013349025  | 6.031860252 | 0.589852138 |
| LOC440558 | 0.01228569   | 5.911567056 | 0.589989171 |
| C20ORF195 | -0.01613683  | 6.057410985 | 0.590006194 |
| SLC6A11   | 0.014860766  | 6.194802778 | 0.590018934 |
| PNLIPRP3  | -0.012326797 | 5.909204465 | 0.590083984 |
| DPPA5     | 0.013235177  | 5.986233223 | 0.590187256 |
| SMCR8     | -0.01310636  | 6.014528862 | 0.590382663 |
| LOC647876 | -0.014328167 | 6.235511075 | 0.590483004 |
| LOC139046 | 0.022141344  | 6.01347089  | 0.590535167 |
| ARHGAP8   | -0.007650111 | 5.992088052 | 0.590577207 |
| PLEKHG2   | -0.018177166 | 6.499303188 | 0.590599109 |
| HTR3D     | 0.009349763  | 6.124053389 | 0.590696515 |
| TRIM31    | 0.014070286  | 6.171208444 | 0.590748588 |
| HSPC105   | 0.013404605  | 6.15294104  | 0.590877754 |
| HERPUD2   | -0.019760722 | 6.940966256 | 0.59092897  |
| UCN2      | -0.016430368 | 5.941154396 | 0.591078016 |
| LOC391730 | 0.013454211  | 6.021286496 | 0.591128112 |
| LOC402716 | -0.015936956 | 5.957842074 | 0.591228839 |
| TAOK2     | -0.013871491 | 6.45603413  | 0.591254127 |
| CHD2      | 0.013349362  | 6.499873451 | 0.591325145 |
| LOC647646 | 0.014869339  | 6.199007763 | 0.591402137 |
| GIMAP7    | 0.044261776  | 7.973759685 | 0.591446261 |
| LOC642408 | -0.013509362 | 5.958322681 | 0.591464397 |
| LOC648596 | -0.011637304 | 6.177738261 | 0.591470151 |
| SERPINB7  | -0.009794894 | 6.01759197  | 0.591626329 |
| IHH       | -0.013090441 | 6.001283848 | 0.591732316 |
| LOC647310 | -0.013412527 | 6.086051725 | 0.591747872 |
| ANKRD7    | 0.010803367  | 6.112583593 | 0.591780851 |
| OR52K2    | -0.012786058 | 6.055276716 | 0.591819606 |
| LOC652675 | 0.016556697  | 6.69629941  | 0.591866776 |
| C11ORF30  | -0.014314177 | 6.459815428 | 0.59192513  |
| ARHGEF16  | -0.022577874 | 5.979308857 | 0.59205802  |
| SAR1P3    | -0.013649115 | 5.97094693  | 0.592165586 |
| FLJ20674  | 0.011729971  | 6.353827478 | 0.592219225 |
| TSSK4     | 0.01374207   | 6.038762366 | 0.592465162 |
| CTNNA2    | -0.016869009 | 6.131334407 | 0.592467761 |
| FKSG2     | -0.012592858 | 5.953026219 | 0.592847819 |
| PLRG1     | -0.016875474 | 8.956446706 | 0.592890176 |
| PIGR      | 0.013781576  | 6.050649144 | 0.592956314 |
| UBXN7     | 0.013230981  | 6.131874746 | 0.59298712  |
| ARID4B    | 0.025659834  | 7.307675471 | 0.593074256 |
| NFIL3     | 0.038572823  | 8.225249394 | 0.593085938 |
| ZNF81     | -0.01564025  | 5.948348835 | 0.593213173 |
| OR10S1    | -0.014111914 | 6.182995938 | 0.593248946 |
| LOC440226 | 0.01592376   | 6.384494355 | 0.593280558 |
| CLU1      | 0.01471555   | 5.96387804  | 0.593289382 |
| CCT3      | -0.025236335 | 9.188580162 | 0.593342368 |
| LOC121792 | -0.014870361 | 6.15167681  | 0.593502978 |
| SMYD1     | -0.055019923 | 11.76443099 | 0.593534649 |
| RAD51L1   | -0.010833538 | 6.030599966 | 0.593595033 |

## DEG.infomation

|               |              |             |             |
|---------------|--------------|-------------|-------------|
| HEXIM1        | 0.020288955  | 6.344717228 | 0.593801923 |
| LOC651609     | 0.014173723  | 6.054875002 | 0.593859314 |
| LOC648153     | -0.012852125 | 6.174329572 | 0.593900605 |
| LOC648251     | 0.011408396  | 6.162179946 | 0.593921457 |
| CENPP         | 0.020560815  | 6.537576585 | 0.593935396 |
| LOC439945     | -0.014481427 | 6.216350389 | 0.594013993 |
| GH1           | 0.009894961  | 5.985120489 | 0.594016392 |
| CNGB3         | -0.014818697 | 5.97618164  | 0.594116614 |
| FOXQ1         | -0.014567644 | 6.077177476 | 0.594204928 |
| TERT          | -0.010987745 | 6.036677168 | 0.594234996 |
| CCNY          | -0.024837857 | 8.598928687 | 0.594245319 |
| HIST1H4I      | 0.012880893  | 6.027366137 | 0.594249386 |
| GNG13         | -0.013252802 | 5.992858093 | 0.594367377 |
| PTCH2         | 0.016655121  | 6.055595422 | 0.594377068 |
| ANP32D        | -0.011979226 | 5.92195303  | 0.594465146 |
| LOC283116     | -0.010485399 | 6.15433402  | 0.594479388 |
| DKFZP781G0119 | 0.009828948  | 5.972832072 | 0.594526007 |
| BPI           | 0.012996507  | 6.113505815 | 0.594798547 |
| LOC643672     | -0.013313073 | 6.066410127 | 0.594805087 |
| LOC648085     | 0.015212713  | 6.014083865 | 0.594814256 |
| LOC648277     | -0.014569859 | 6.232791743 | 0.594918656 |
| FABP4         | 0.063114419  | 9.370864006 | 0.595094125 |
| FLJ26056      | 0.011425952  | 6.056909813 | 0.595117516 |
| SYT3          | 0.01747226   | 6.288443362 | 0.595199799 |
| LOC644300     | -0.013701896 | 6.191472567 | 0.595337749 |
| TMEM102       | -0.011574132 | 6.095087604 | 0.595397125 |
| OR4D11        | 0.012771548  | 6.080355301 | 0.59578765  |
| HES2          | 0.009996127  | 6.022434226 | 0.595840631 |
| LOC644766     | 0.012526118  | 6.102804349 | 0.596029958 |
| LOC643171     | -0.008571899 | 6.10709119  | 0.596126177 |
| NBPF14        | 0.021218825  | 6.722390802 | 0.596133608 |
| LOC390551     | -0.017869295 | 6.080402865 | 0.59615429  |
| WIPI2         | 0.014193487  | 6.748154881 | 0.596161206 |
| LOC646503     | -0.015949339 | 6.07350874  | 0.596200182 |
| ROR1          | 0.02701428   | 6.873117321 | 0.596248087 |
| EIF3D         | -0.031217992 | 10.08749556 | 0.59625519  |
| KCNG3         | 0.009408578  | 5.977763333 | 0.596280835 |
| C2ORF66       | 0.013442118  | 6.177770264 | 0.596563385 |
| LOC647130     | -0.012471524 | 6.020048856 | 0.59661644  |
| LOC643614     | 0.013437344  | 6.131775171 | 0.596711458 |
| GPR171        | -0.014031748 | 5.931073835 | 0.596810279 |
| ZNF157        | 0.017329379  | 6.038996225 | 0.596963201 |
| GUCY2F        | -0.019165499 | 6.098083056 | 0.596993495 |
| C17ORF51      | -0.009796834 | 6.179645857 | 0.597202253 |
| FLT3          | 0.015753172  | 6.173290434 | 0.597237802 |
| LOC648775     | 0.01271534   | 5.985698766 | 0.597317835 |
| PDLIM2        | -0.01065839  | 6.030690979 | 0.5973841   |
| PRAMEF6       | -0.012371345 | 5.996884314 | 0.597426424 |
| HPN           | -0.011377582 | 6.239687722 | 0.597509341 |
| PLA2G2E       | -0.013193182 | 6.079005751 | 0.597877412 |
| C11ORF44      | -0.015173723 | 5.992112275 | 0.597914575 |

## DEG.infomation

|           |              |             |             |
|-----------|--------------|-------------|-------------|
| LOC649616 | -0.013528425 | 6.079764631 | 0.598016834 |
| LOC652454 | -0.012775343 | 5.994463742 | 0.598056017 |
| LOC653630 | 0.015273303  | 5.98182377  | 0.598110566 |
| FAM3C     | 0.028409333  | 7.794230862 | 0.598149681 |
| LOC441316 | 0.012865376  | 5.97554543  | 0.59820572  |
| LOC649458 | 0.011439218  | 6.054890971 | 0.598206661 |
| AKR1C1    | 0.014381386  | 5.877284928 | 0.598244594 |
| TAF6      | -0.027908497 | 7.646158196 | 0.5983954   |
| BTN2A3    | -0.012567333 | 5.992138386 | 0.598487707 |
| SMYD4     | -0.025655451 | 7.763812309 | 0.598492262 |
| DNAJC10   | -0.020451858 | 8.280100843 | 0.598557502 |
| LOC647747 | -0.017052969 | 6.086703741 | 0.598628305 |
| KRTAP20-1 | -0.01315712  | 5.961284414 | 0.598753059 |
| T1560     | -0.01334989  | 5.955567065 | 0.598779998 |
| C19ORF30  | 0.013844211  | 6.174353111 | 0.598799955 |
| LOC647920 | -0.01282293  | 6.170390864 | 0.598800249 |
| MUS81     | 0.019165046  | 7.524378423 | 0.598835296 |
| CYP27A1   | -0.026088048 | 7.625913501 | 0.5988877   |
| LOC648608 | 0.023142034  | 6.080040351 | 0.598943276 |
| PTK2      | -0.022266617 | 10.01716941 | 0.598981292 |
| OR1E2     | 0.009047998  | 6.01766295  | 0.598991616 |
| TAS2R60   | 0.014530856  | 5.968604834 | 0.599059908 |
| LOC400954 | -0.009645178 | 5.972079967 | 0.599075285 |
| LOC728765 | 0.012958921  | 6.080191894 | 0.599090908 |
| SLC46A1   | -0.014182887 | 6.198428322 | 0.599094871 |
| SLC25A4   | -0.021392616 | 14.25384173 | 0.5991166   |
| ATG9B     | 0.013982709  | 6.068039261 | 0.599126007 |
| C1ORF113  | -0.015218678 | 6.48474253  | 0.599151615 |
| C1QTNF3   | 0.008714922  | 6.023024915 | 0.599156221 |
| LOC389852 | -0.014310233 | 5.990821841 | 0.599325266 |
| LOC643660 | 0.01104232   | 6.068373946 | 0.599357476 |
| LOC388906 | -0.012978517 | 6.108274172 | 0.59953995  |
| SAMD9L    | 0.036412587  | 7.114836428 | 0.599579206 |
| FBXO33    | -0.026095916 | 8.189398576 | 0.599631966 |
| MGC24125  | 0.015091176  | 6.071048508 | 0.59973123  |
| CFTR      | 0.015356567  | 6.119996898 | 0.599806203 |
| LRP2      | 0.012725629  | 6.003935359 | 0.60007085  |
| LOC653382 | -0.008535501 | 6.327393367 | 0.600208735 |
| MTNR1A    | 0.013759234  | 6.010404746 | 0.600216354 |
| PXN       | -0.017116732 | 6.837595992 | 0.60021699  |
| C1ORF200  | 0.010869772  | 6.297667363 | 0.600237679 |
| OR7E24    | 0.00949435   | 6.007368413 | 0.600245256 |
| LOC255411 | -0.011820552 | 6.060567984 | 0.600262874 |
| LOC653194 | 0.016605493  | 6.127652164 | 0.600455808 |
| HIST1H2AD | 0.014096763  | 6.011614622 | 0.600481708 |
| LOC648346 | -0.01377821  | 5.924678628 | 0.600516706 |
| APOC4     | -0.013900582 | 6.065450919 | 0.60052737  |
| LOC400807 | -0.010015504 | 6.120345299 | 0.600581413 |
| USHBP1    | 0.020610675  | 6.518857948 | 0.600683505 |
| RAB39B    | -0.014322825 | 5.87360778  | 0.600702734 |
| LOC652762 | -0.012980264 | 6.126285534 | 0.600715054 |

## DEG.infomation

|              |              |             |             |
|--------------|--------------|-------------|-------------|
| LOC645402    | -0.009612816 | 6.101789846 | 0.6007386   |
| LOC644209    | -0.012031344 | 5.919267461 | 0.60074836  |
| SIGLEC15     | 0.012334819  | 6.038405423 | 0.60097564  |
| LOC649469    | -0.014791492 | 6.236593828 | 0.601017901 |
| UNQ830       | 0.013412842  | 6.396045453 | 0.601023804 |
| LOC645835    | 0.015169333  | 6.124065682 | 0.601078323 |
| TP53TG5      | 0.012122738  | 6.039808244 | 0.601081654 |
| TEPP         | -0.007409466 | 6.100387345 | 0.601109471 |
| LOC642718    | 0.011741227  | 6.141150248 | 0.601119868 |
| PMCHL2       | 0.008997307  | 6.092298251 | 0.601149081 |
| LOC653631    | 0.028988545  | 6.880339058 | 0.601154095 |
| C14ORF118    | -0.010658849 | 6.258505677 | 0.601191399 |
| PCDHAC1      | 0.009083707  | 5.960615658 | 0.601248441 |
| LOC643377    | 0.0127673    | 5.981479878 | 0.6013164   |
| ATXN3L       | -0.012905523 | 5.931331002 | 0.601349611 |
| FRG2B        | -0.009516242 | 6.004519599 | 0.601360291 |
| OR7G3        | 0.016588092  | 6.066344358 | 0.601531803 |
| LOC440350    | -0.020281221 | 6.459180595 | 0.601608636 |
| APCS         | -0.015313729 | 6.524895192 | 0.601712194 |
| LOC643195    | -0.013550643 | 5.931408317 | 0.601873358 |
| OR51F1       | 0.009488981  | 6.1145989   | 0.601944187 |
| SNORD21      | -0.013756805 | 6.191101052 | 0.602004702 |
| STK24        | -0.018783239 | 9.624263111 | 0.602046287 |
| DKFZP434M131 | -0.010213215 | 6.196585443 | 0.602060945 |
| SPINK5L2     | 0.012403746  | 6.058745775 | 0.602180411 |
| LOC644035    | -0.009257563 | 5.960087105 | 0.60223998  |
| LOC653536    | -0.013740132 | 6.004363469 | 0.602315109 |
| ADH4         | 0.009941834  | 6.005693829 | 0.602421535 |
| PCDP1        | 0.0127401    | 6.254554701 | 0.60251934  |
| C12ORF37     | 0.015712072  | 6.258797908 | 0.602534228 |
| PLA2G1B      | 0.012606199  | 5.946703123 | 0.602645713 |
| LOC646310    | -0.012716907 | 6.160955864 | 0.602674116 |
| TEAD1        | -0.009807738 | 6.075738978 | 0.60284888  |
| NDUFB3       | 0.025929525  | 12.42770833 | 0.602926086 |
| C10ORF25     | -0.020858741 | 5.847145155 | 0.603013133 |
| FLJ45455     | -0.014042466 | 6.037603008 | 0.603030404 |
| FLJ44313     | -0.01684351  | 6.061853481 | 0.603137876 |
| KIAA1804     | 0.010579612  | 6.163945103 | 0.603150293 |
| TM6SF2       | 0.007879974  | 6.101584223 | 0.603153685 |
| FLJ38717     | 0.024155342  | 7.121859966 | 0.603188665 |
| FLJ25996     | -0.015231276 | 6.059840316 | 0.603276906 |
| ASB12        | -0.026737368 | 7.065186503 | 0.603521163 |
| LOC400299    | -0.012758169 | 6.012209162 | 0.603550957 |
| LOC650787    | 0.012456157  | 6.001906086 | 0.603558711 |
| LOC401305    | 0.014734585  | 6.01925851  | 0.603630329 |
| SPTLC3       | 0.019740342  | 6.408334527 | 0.603643601 |
| TGM6         | 0.016779997  | 6.10847911  | 0.603696892 |
| LOC441554    | -0.012566283 | 6.252563482 | 0.603890132 |
| ARL8B        | 0.024703204  | 10.12063859 | 0.603897794 |
| LOC650496    | 0.012587085  | 6.011504709 | 0.603946888 |
| TIMD4        | -0.013866877 | 5.994599829 | 0.604038925 |

## DEG.infomation

|           |              |             |             |
|-----------|--------------|-------------|-------------|
| LOC650339 | -0.010550737 | 6.289739844 | 0.604057553 |
| DPPA4     | 0.012513183  | 6.041807934 | 0.604167491 |
| MAK       | -0.009145086 | 6.038223001 | 0.604217504 |
| ZNF575    | -0.019689868 | 6.031732625 | 0.6042459   |
| SFRS16    | -0.019149812 | 6.58065633  | 0.604351805 |
| DNMT3L    | -0.010395995 | 6.059311984 | 0.604388756 |
| MYOD1     | 0.015079853  | 6.047850895 | 0.604480001 |
| NGEF      | 0.014748646  | 6.0212066   | 0.604547916 |
| LOC645228 | 0.014663697  | 6.013912437 | 0.604576786 |
| MRPL38    | -0.032350796 | 8.872216856 | 0.604653547 |
| OR2B6     | -0.012796925 | 6.031906978 | 0.604713403 |
| LOC729399 | 0.010316967  | 6.058754183 | 0.604750914 |
| LOC651834 | 0.012249912  | 5.91224867  | 0.605039505 |
| LOC442480 | 0.012710714  | 5.996472537 | 0.605048403 |
| LOC642749 | 0.02382718   | 5.938089342 | 0.605066796 |
| PRAMEF19  | 0.013332766  | 6.130511564 | 0.605108391 |
| MS4A1     | 0.008982867  | 6.028273547 | 0.605147903 |
| PPP3R2    | 0.013679561  | 6.010046803 | 0.605281395 |
| FAM163B   | -0.012333871 | 6.105520763 | 0.605325134 |
| NAALAD2   | 0.026039594  | 6.330663931 | 0.605381046 |
| LOC651845 | 0.014955105  | 6.115750961 | 0.605405765 |
| LOC401630 | -0.013727602 | 6.007970411 | 0.605562747 |
| OPRD1     | 0.018359516  | 6.142331294 | 0.605568281 |
| LOC642362 | -0.008842564 | 6.074075383 | 0.605570212 |
| SOSTDC1   | -0.016740954 | 6.341637427 | 0.605593154 |
| LOC653461 | -0.013549254 | 5.898900764 | 0.605620311 |
| LOC644507 | -0.012674243 | 5.972575461 | 0.60563164  |
| DCX       | 0.009072432  | 6.203256701 | 0.605650858 |
| LOC645393 | -0.012274166 | 6.060053142 | 0.605664946 |
| CA5A      | -0.014315391 | 5.923348525 | 0.605699105 |
| NDUFAF1   | -0.050110156 | 8.483956493 | 0.605828078 |
| C9ORF91   | 0.01702946   | 6.483798946 | 0.605899165 |
| LOC644727 | -0.012562798 | 6.000177548 | 0.605899545 |
| FAM127A   | -0.02071649  | 11.79551259 | 0.605904141 |
| LOC389906 | -0.010933518 | 6.008303969 | 0.605936532 |
| BAAT      | -0.013253693 | 5.935521435 | 0.605965112 |
| LOC646823 | 0.012934366  | 6.018174844 | 0.606039686 |
| FLJ36144  | -0.010321484 | 6.075649152 | 0.606070686 |
| GLRA3     | -0.010290881 | 6.025123797 | 0.606139266 |
| OR5B17    | 0.012291991  | 5.949693582 | 0.60617456  |
| OR2T12    | -0.010820051 | 6.103188133 | 0.606186685 |
| LOC254312 | 0.012229912  | 6.080914825 | 0.606270051 |
| IGFBP1    | -0.010949462 | 6.135360199 | 0.606278772 |
| LOC442064 | 0.013447118  | 6.200682787 | 0.606366383 |
| PTK2B     | 0.010482979  | 6.315639042 | 0.606386764 |
| FOXE1     | 0.009568707  | 6.147266657 | 0.606429629 |
| BTN2A2    | 0.00973431   | 6.183818364 | 0.606500994 |
| LOC648123 | -0.012713616 | 6.157214598 | 0.606588652 |
| ANUBL1    | 0.015239614  | 6.171555893 | 0.606603272 |
| LOC643520 | 0.012288956  | 5.960280589 | 0.60666254  |
| BNC2      | -0.017889279 | 6.576346541 | 0.606665955 |

## DEG.infomation

|           |              |             |             |
|-----------|--------------|-------------|-------------|
| RBMV1A1   | 0.009287592  | 5.980040737 | 0.606724501 |
| CCL25     | 0.009358608  | 6.054330482 | 0.606813329 |
| PDE6D     | 0.019541517  | 7.868791238 | 0.606964193 |
| LOC645176 | 0.011589105  | 6.197023811 | 0.607029753 |
| GLOD5     | -0.017942586 | 6.106869411 | 0.607238856 |
| LOC648398 | 0.014049816  | 6.058742517 | 0.607268401 |
| GAS2L3    | 0.016290055  | 6.489226283 | 0.607339007 |
| HTR2C     | -0.008798411 | 5.952207482 | 0.607377687 |
| OPALIN    | 0.010822815  | 5.96630243  | 0.607388988 |
| MTBP      | -0.013303494 | 6.058954799 | 0.607408047 |
| LOC653254 | 0.012581876  | 5.926484902 | 0.60740945  |
| SLC2A8    | -0.035334197 | 8.730057938 | 0.60741135  |
| LOC643897 | 0.012148216  | 6.055157748 | 0.607421864 |
| KRTAP9-8  | -0.00781599  | 6.065716325 | 0.607723021 |
| NDNL2     | -0.024956932 | 6.377921416 | 0.6077767   |
| LOC645689 | -0.011660765 | 5.932827735 | 0.608048462 |
| NRARP     | 0.010572225  | 6.068238259 | 0.608146295 |
| LOC649139 | 0.011187752  | 6.090065682 | 0.608321633 |
| LOC652673 | -0.016937922 | 6.322040332 | 0.608527306 |
| SPRR3     | 0.014739531  | 6.125056338 | 0.608577322 |
| LOC646575 | -0.01188217  | 6.019012317 | 0.608640783 |
| MASTL     | 0.011135878  | 6.237819837 | 0.608705823 |
| RNF213    | 0.014945912  | 6.205757302 | 0.608721362 |
| C11ORF85  | -0.009339492 | 5.98854566  | 0.608902822 |
| OLR1      | 0.027358853  | 6.572457274 | 0.609001619 |
| C7ORF51   | 0.01608852   | 6.091225781 | 0.609015909 |
| TAF1A     | 0.008820411  | 6.245523949 | 0.609064153 |
| LOC651386 | -0.012127667 | 6.045607144 | 0.609180527 |
| LOC646882 | -0.013998346 | 5.948799671 | 0.609234949 |
| LOC649337 | -0.012739025 | 6.102124007 | 0.609293678 |
| AGAP2     | 0.012542736  | 6.031848026 | 0.609316799 |
| FLJ41327  | -0.014016611 | 6.090380417 | 0.609338153 |
| PRKCDBP   | -0.032872605 | 10.26458699 | 0.609371184 |
| LYZL1     | 0.01022514   | 6.166523009 | 0.60941433  |
| OR8U1     | -0.012689732 | 6.100354663 | 0.60946444  |
| LOC339209 | -0.011941607 | 6.058461693 | 0.609509737 |
| KCND3     | -0.00960626  | 6.235415121 | 0.609573517 |
| LOC642356 | -0.011672412 | 5.940105257 | 0.609682718 |
| DPP6      | -0.008283328 | 6.012598713 | 0.609699778 |
| C12ORF69  | 0.013575867  | 5.950121194 | 0.609727712 |
| TMEM126A  | 0.032649234  | 10.62984922 | 0.609847891 |
| LOC649942 | 0.012692526  | 6.095374645 | 0.609869337 |
| LOC649738 | -0.012832664 | 6.038930509 | 0.609906939 |
| KCNV1     | 0.012359603  | 5.945074627 | 0.610014191 |
| BMPER     | -0.016189288 | 5.907624923 | 0.610058767 |
| LOC642966 | 0.017954906  | 5.992000125 | 0.610105233 |
| KIAA0853  | 0.014703123  | 5.888357441 | 0.610111819 |
| ITGB7     | 0.014574069  | 6.29404836  | 0.610142768 |
| FGF6      | 0.013954261  | 5.980199305 | 0.61017818  |
| LOC440864 | -0.014196597 | 5.945771588 | 0.610232815 |
| LOC342933 | 0.012167152  | 6.042955745 | 0.610451431 |

## DEG.infomation

|           |              |             |             |
|-----------|--------------|-------------|-------------|
| C12ORF12  | -0.013817556 | 6.033269923 | 0.610453582 |
| LOC642176 | 0.013633388  | 5.902845675 | 0.610537293 |
| TMC4      | -0.017602483 | 6.19385442  | 0.610552099 |
| LOC650796 | 0.017857032  | 6.088037974 | 0.610730339 |
| SLC17A6   | -0.012315367 | 5.937840325 | 0.610786962 |
| HIST1H4J  | 0.014263533  | 6.17355585  | 0.610834987 |
| LOC647500 | -0.009293524 | 6.019268288 | 0.610854881 |
| RND2      | 0.014638707  | 6.503595101 | 0.610920113 |
| CD9       | 0.031336952  | 7.809163822 | 0.611018913 |
| FLJ21511  | -0.014476529 | 6.05359287  | 0.611023911 |
| C1ORF151  | -0.010553193 | 6.186184465 | 0.611096026 |
| PRM3      | -0.008544031 | 6.141373826 | 0.611134173 |
| ENTPD5    | -0.013430121 | 6.24920135  | 0.611228837 |
| ETV3L     | -0.011931532 | 6.001508223 | 0.611250497 |
| PART1     | 0.013938502  | 6.026311925 | 0.611318715 |
| MAP3K15   | 0.016552832  | 6.295425225 | 0.611357764 |
| GAGE12G   | 0.030201014  | 6.101775405 | 0.611387626 |
| FAM21B    | -0.007995537 | 6.251302326 | 0.611400387 |
| LOC642867 | 0.012113481  | 5.987630957 | 0.611410603 |
| ZNF611    | -0.010285499 | 6.121461075 | 0.61169267  |
| GNAQ      | -0.023052353 | 6.583408294 | 0.611748123 |
| TKTL2     | 0.013207247  | 5.890359677 | 0.611819627 |
| ATP6V0E2  | 0.051369812  | 10.98769528 | 0.611907805 |
| SSX7      | -0.01242412  | 5.926160255 | 0.611932965 |
| C6ORF188  | -0.016120841 | 6.31574603  | 0.611942806 |
| OR5M3     | -0.018159589 | 6.119898489 | 0.612039922 |
| LOC648718 | 0.012593127  | 6.094460008 | 0.612046572 |
| LOC653809 | -0.011034636 | 5.931247329 | 0.612134089 |
| SETD7     | -0.011643034 | 6.119068956 | 0.612286958 |
| ADAMTS4   | -0.017753314 | 6.272081317 | 0.612458136 |
| LOC647890 | -0.012360669 | 6.486828625 | 0.612623698 |
| SCLY      | 0.013536533  | 6.606081585 | 0.612655053 |
| LOC343705 | -0.013220751 | 6.260865047 | 0.612686828 |
| PTCH1     | 0.014433199  | 6.414165213 | 0.61290084  |
| C1ORF49   | -0.014999054 | 6.172458872 | 0.612955761 |
| HAO1      | 0.010244606  | 6.120176023 | 0.61295947  |
| TGIF2     | -0.021549056 | 6.752861468 | 0.613017817 |
| PAQR5     | 0.009195953  | 6.06273247  | 0.61302418  |
| FANCB     | 0.010006557  | 6.345851739 | 0.613107255 |
| LOC644806 | 0.01227165   | 6.027601043 | 0.613150696 |
| CTNNBIP1  | -0.031117999 | 7.649531347 | 0.613151364 |
| LHX6      | -0.024741794 | 7.273723617 | 0.613164268 |
| ACSL4     | -0.028003563 | 7.962891057 | 0.613200322 |
| PPP2R2A   | 0.026734289  | 9.595424163 | 0.613310458 |
| KRTAP21-2 | 0.012902515  | 6.043388293 | 0.613353012 |
| NPFF      | 0.015036019  | 6.203733546 | 0.613382546 |
| FAM63B    | 0.021250654  | 6.697737279 | 0.613543447 |
| LOC648517 | -0.012816348 | 6.140165591 | 0.613710428 |
| LOC441070 | 0.01759905   | 5.937392053 | 0.613766541 |
| CXCL3     | 0.021338167  | 6.057024571 | 0.613807961 |
| LOC644962 | -0.008847676 | 6.030038643 | 0.613834773 |



## DEG.infomation

|           |              |             |             |
|-----------|--------------|-------------|-------------|
| LOC644829 | 0.012770289  | 6.052967408 | 0.613887859 |
| LOC643729 | -0.012418565 | 5.916661245 | 0.613986512 |
| LOC649340 | 0.013547648  | 6.12800054  | 0.61409148  |
| LOC644373 | 0.012954461  | 6.072660238 | 0.614148634 |
| RGSL1     | 0.010335973  | 5.936862014 | 0.61417563  |
| LOC643595 | -0.013799675 | 5.978967293 | 0.614355405 |
| LOC649858 | 0.012205106  | 6.0509866   | 0.614364442 |
| RPP14     | 0.017103887  | 6.002595893 | 0.614404851 |
| LOC643577 | 0.013233028  | 6.214635733 | 0.614483525 |
| RAG2      | 0.012675679  | 5.942621551 | 0.614521501 |
| LOC642866 | -0.012381319 | 5.995273807 | 0.614546625 |
| SOST      | -0.010107435 | 5.986301553 | 0.61456416  |
| C1ORF215  | 0.011089374  | 6.09746599  | 0.614574714 |
| CHRND     | 0.012805689  | 6.00902529  | 0.614577185 |
| DND1      | 0.012165768  | 6.02607     | 0.614688638 |
| GPR111    | -0.014471649 | 5.93331731  | 0.614774826 |
| OR7C1     | -0.013486526 | 5.932898397 | 0.614864181 |
| AGTR2     | 0.018616677  | 6.35171472  | 0.614989378 |
| FLJ42220  | 0.014479439  | 5.947107821 | 0.614992508 |
| LOC146909 | 0.011078603  | 6.240939242 | 0.615017826 |
| SOX3      | -0.010992341 | 6.004902546 | 0.615147593 |
| ZRANB3    | 0.009829235  | 6.155818851 | 0.61524897  |
| LOC642817 | -0.045396481 | 10.36176146 | 0.615377131 |
| ZDHHC6    | -0.01819831  | 8.58442736  | 0.615378838 |
| KCNIP4    | -0.005934296 | 6.012359425 | 0.61543618  |
| LOC728242 | -0.014682177 | 6.31296163  | 0.615480855 |
| LYPLA1    | -0.027758635 | 6.99768596  | 0.615525811 |
| RIMS1     | 0.013338356  | 6.079090636 | 0.615535908 |
| LOC440792 | 0.014527127  | 5.933051688 | 0.615578864 |
| PLEKHG4B  | 0.011466074  | 5.871704862 | 0.615624619 |
| OLIG3     | -0.0155979   | 6.191561504 | 0.615803518 |
| FAM84A    | 0.014527209  | 6.086568798 | 0.615813801 |
| ATOX1     | -0.026692166 | 9.377350713 | 0.61583929  |
| CRYBA4    | 0.011179916  | 6.006878012 | 0.615842877 |
| LOC649313 | 0.013590746  | 6.111762217 | 0.615853751 |
| LOC729034 | -0.015161207 | 5.958233878 | 0.615891588 |
| OR1K1     | -0.018500188 | 5.922076934 | 0.615929906 |
| DBF4B     | 0.009631568  | 6.022393413 | 0.615970395 |
| LOC338829 | -0.018677898 | 6.020864908 | 0.616042123 |
| LOC644586 | -0.01151164  | 6.060359639 | 0.616074306 |
| PCDHB7    | 0.01178606   | 5.938499369 | 0.616133787 |
| LOC647337 | -0.012898163 | 5.88438356  | 0.616152475 |
| LOC652128 | 0.011494935  | 6.075285021 | 0.616194273 |
| LOC731501 | -0.013506502 | 6.170478021 | 0.616229548 |
| SHC2      | 0.010268873  | 6.420164568 | 0.61635128  |
| MFN1      | 0.014085166  | 6.705506391 | 0.616628962 |
| LOC649909 | -0.014609897 | 5.94200826  | 0.616675273 |
| SPACA3    | 0.013737872  | 6.237584127 | 0.616808625 |
| PPFIA3    | 0.018696515  | 6.151092379 | 0.61688541  |
| DUSP13    | 0.022082893  | 7.393080839 | 0.617071173 |
| HDGFL1    | -0.008081881 | 6.099234608 | 0.617128123 |

## DEG.infomation

|           |              |             |             |
|-----------|--------------|-------------|-------------|
| TMEM200A  | -0.014196697 | 6.095198861 | 0.617153317 |
| RHBG      | -0.014240029 | 5.996047016 | 0.617245335 |
| C8ORF54   | 0.012769875  | 5.994698512 | 0.617327675 |
| LOC401002 | 0.01887212   | 6.096924087 | 0.617384996 |
| VTCN1     | 0.014722686  | 5.991162349 | 0.617498541 |
| SLFN13    | -0.013699169 | 6.278838587 | 0.617510714 |
| LOC645198 | -0.010845873 | 6.084803109 | 0.617522048 |
| LOC641942 | 0.012864209  | 6.045990843 | 0.617628998 |
| KRTDAP    | -0.014261056 | 6.217017929 | 0.617634301 |
| FAM124A   | 0.014871584  | 6.204074482 | 0.617695177 |
| LOC642312 | -0.012567082 | 6.077245405 | 0.617717779 |
| LOC727922 | 0.013887004  | 6.035447022 | 0.617847363 |
| SERINC4   | -0.017806304 | 6.033128298 | 0.617861836 |
| MKNK1     | 0.023830475  | 7.567768546 | 0.617933019 |
| CHRNA7    | 0.013014416  | 6.156658059 | 0.617962318 |
| LOC652530 | 0.011574735  | 6.133313138 | 0.617997722 |
| REPIN1    | 0.023843909  | 9.091453975 | 0.618029993 |
| OR1S1     | 0.008838094  | 6.006672268 | 0.61803879  |
| NUP210L   | 0.010280443  | 5.999407332 | 0.618146518 |
| RTBDN     | 0.007162441  | 6.028972794 | 0.618173979 |
| C17ORF77  | -0.012932252 | 5.88671752  | 0.61821043  |
| LOC644625 | 0.014026368  | 6.274665505 | 0.618486203 |
| PSPHL     | 0.012789212  | 6.114906137 | 0.618535595 |
| CRY1      | -0.033632795 | 8.10904556  | 0.618741789 |
| LOC644038 | 0.008762277  | 6.063214202 | 0.618913508 |
| LOC644011 | 0.011990459  | 6.113773096 | 0.618994658 |
| LOC442519 | 0.015930035  | 6.175047644 | 0.61904644  |
| LOC649101 | 0.011037679  | 6.076688691 | 0.61916119  |
| LOC648424 | -0.012225021 | 5.961294887 | 0.619173835 |
| NEIL3     | -0.010567136 | 5.97565112  | 0.619255402 |
| LOC651704 | 0.012148088  | 6.022364381 | 0.619300202 |
| G3BP2     | -0.021240379 | 8.348965668 | 0.619358675 |
| LOC400723 | -0.012170496 | 5.958426003 | 0.61939786  |
| LOC400236 | -0.012249273 | 6.128956734 | 0.619463463 |
| C6ORF97   | 0.012252109  | 6.174668193 | 0.619493025 |
| S100A14   | 0.017213092  | 6.159173632 | 0.61953377  |
| ZNF208    | 0.0095619    | 6.006502624 | 0.619749982 |
| UTF1      | -0.013707852 | 5.953869026 | 0.619814311 |
| CSAG3B    | -0.007963086 | 6.045740361 | 0.619947091 |
| PPEF2     | 0.009723161  | 5.962078584 | 0.620084791 |
| ME1       | 0.025403979  | 7.562321184 | 0.620208723 |
| LOC347549 | -0.019811819 | 5.924037778 | 0.620248825 |
| CHRNA1    | -0.012063163 | 6.149436362 | 0.620283417 |
| LOC641948 | 0.012964505  | 6.1476303   | 0.620369493 |
| LOC648628 | 0.01206351   | 5.945946451 | 0.620421253 |
| CARD18    | -0.013066074 | 6.03490228  | 0.620481407 |
| LOC644623 | -0.005992454 | 6.025654926 | 0.620542897 |
| LOC441171 | 0.011969465  | 6.039412613 | 0.620657377 |
| LOC653521 | 0.015609774  | 6.185184301 | 0.620752814 |
| LOC643866 | -0.011937698 | 5.981302143 | 0.620825412 |
| URM1      | -0.024553414 | 10.20244675 | 0.620919967 |

## DEG.infomation

|           |              |             |             |
|-----------|--------------|-------------|-------------|
| SV2B      | 0.039465424  | 6.834025769 | 0.620930489 |
| KHDRBS2   | 0.01197599   | 6.014608617 | 0.620940056 |
| FLJ14712  | -0.011106125 | 6.090608787 | 0.621024957 |
| LOC644031 | 0.011259189  | 6.079766519 | 0.621047225 |
| CCKBR     | -0.014115045 | 5.983915573 | 0.621069178 |
| FAM19A3   | 0.010435488  | 5.923216527 | 0.621078852 |
| LOC651612 | -0.012997522 | 5.910189644 | 0.621110937 |
| LOC130576 | 0.012957892  | 5.935417491 | 0.621222631 |
| PIK3CG    | 0.013709172  | 6.271000204 | 0.621265602 |
| LOC653736 | 0.011866179  | 6.048783522 | 0.621273001 |
| PWP2      | 0.019379934  | 6.339313528 | 0.621383644 |
| NUP210    | 0.016464509  | 6.310701495 | 0.621487826 |
| LOC284232 | -0.013320436 | 6.165113582 | 0.621695075 |
| LOC647625 | -0.01395304  | 6.058679264 | 0.621792995 |
| HEXDC     | -0.024248669 | 6.698663336 | 0.621938423 |
| ZNF714    | 0.015950417  | 6.078232111 | 0.621963754 |
| C17ORF38  | 0.013847293  | 6.131420379 | 0.622028598 |
| LOC653313 | 0.011018393  | 6.051837929 | 0.622065356 |
| LOC652615 | -0.017851803 | 6.710123017 | 0.622065368 |
| ATG2A     | -0.01897169  | 7.476848015 | 0.622065978 |
| KLHL1     | -0.013406195 | 6.149122312 | 0.622069452 |
| LOC648342 | 0.014657728  | 6.063841342 | 0.622091812 |
| DMBX1     | 0.012498447  | 6.082396537 | 0.622420115 |
| LHB       | -0.013122713 | 6.026696633 | 0.622453067 |
| ZNF311    | 0.015849014  | 6.023417618 | 0.622483796 |
| FLJ25328  | 0.013937242  | 5.945973567 | 0.622560279 |
| PEAR1     | -0.016025122 | 6.946949724 | 0.622568326 |
| LOC344741 | 0.012038161  | 6.034885028 | 0.62260477  |
| BCL2L14   | -0.007417116 | 6.074755577 | 0.622663957 |
| LOC648001 | 0.011367536  | 6.187997175 | 0.622704041 |
| LOC644753 | -0.010166503 | 5.949114289 | 0.622811782 |
| WBP5      | 0.026327103  | 9.143016588 | 0.622819638 |
| LOC648744 | -0.013285213 | 6.354824329 | 0.62294106  |
| MAP7D2    | -0.01292665  | 6.000736302 | 0.622964445 |
| MYBPC2    | 0.014937553  | 5.95887264  | 0.622971513 |
| LOC644208 | 0.010971494  | 5.843000407 | 0.623184058 |
| HSD17B6   | -0.013118346 | 5.976783038 | 0.623253753 |
| LOC441155 | -0.010251353 | 6.380269607 | 0.623598662 |
| LOC283432 | -0.012036173 | 5.87928517  | 0.623853833 |
| LOC440292 | -0.011732123 | 6.147572581 | 0.623903341 |
| ITIH5L    | 0.01265581   | 5.998577379 | 0.624027531 |
| KIAA1024  | -0.013288236 | 6.106491286 | 0.624083463 |
| POFUT2    | -0.01535958  | 7.864982221 | 0.624132553 |
| SH2D4B    | 0.009281558  | 5.964519835 | 0.624137708 |
| LOC731338 | 0.011470985  | 6.039170592 | 0.624284253 |
| C14ORF21  | 0.012159815  | 6.560767981 | 0.624340105 |
| LOC643102 | -0.009244477 | 6.079740114 | 0.624352685 |
| TMEM220   | 0.011141116  | 6.139068351 | 0.624370261 |
| LOC346157 | -0.012636746 | 6.06929593  | 0.624391446 |
| TMEM155   | -0.016888044 | 6.276726886 | 0.624895272 |
| OTUD3     | -0.017809035 | 6.139283311 | 0.624939465 |

## DEG.infomation

|           |              |             |             |
|-----------|--------------|-------------|-------------|
| LOC647859 | 0.009899541  | 6.139288014 | 0.624950364 |
| PNLIPRP1  | -0.012614527 | 6.067014409 | 0.6250171   |
| PRSS1     | 0.011837528  | 6.096774001 | 0.625127974 |
| LOC650950 | -0.013621533 | 6.28465847  | 0.625237319 |
| RNF157    | -0.01544849  | 6.264809144 | 0.625264607 |
| LOC652470 | 0.011881731  | 6.127097888 | 0.625380252 |
| INCA1     | 0.015739888  | 6.561067013 | 0.625420165 |
| LOC646670 | 0.011734441  | 6.122402006 | 0.62543395  |
| C7ORF33   | -0.012083683 | 5.971243718 | 0.625447275 |
| LOC650990 | 0.009165998  | 6.109960962 | 0.625478804 |
| TREML1    | 0.014804582  | 6.366483054 | 0.62553427  |
| LOC652662 | 0.011445325  | 6.106136271 | 0.625585269 |
| LOC401074 | 0.016461806  | 6.211082238 | 0.625609771 |
| PRDM12    | 0.018009951  | 5.894524237 | 0.625701234 |
| PCDH8     | -0.008725766 | 5.933520463 | 0.625735694 |
| PAEP      | 0.009065883  | 6.002360502 | 0.625829941 |
| LOC649971 | 0.012702979  | 6.009093266 | 0.625884162 |
| JMJD3     | 0.016505354  | 6.236010746 | 0.625955304 |
| FGF14     | -0.00962163  | 6.026222871 | 0.62600349  |
| PLXND1    | -0.025969997 | 6.051483202 | 0.626015438 |
| LOC644474 | 0.015756967  | 5.964087654 | 0.626017031 |
| TCEB1P3   | 0.011953794  | 6.012376214 | 0.626056317 |
| LOC648874 | -0.013462544 | 6.185639498 | 0.62616775  |
| TCF2      | -0.007428327 | 6.014321803 | 0.626222032 |
| TTY8      | 0.01331498   | 6.123732719 | 0.626264166 |
| FAM82A1   | -0.011503354 | 6.0066735   | 0.626305596 |
| LOC652054 | -0.011735077 | 5.938099749 | 0.6263118   |
| OR4D9     | 0.010845176  | 5.98557174  | 0.626386275 |
| GPR120    | -0.012557259 | 5.973383439 | 0.626436861 |
| KLHL10    | 0.011997554  | 5.975059796 | 0.626463986 |
| MAPK8IP2  | 0.007328007  | 6.028849826 | 0.626507597 |
| VN1R4     | 0.014020734  | 6.140410563 | 0.626518337 |
| ABCC2     | -0.013683203 | 6.151753236 | 0.626552101 |
| BST1      | 0.014337456  | 6.293660446 | 0.626596194 |
| LOC652849 | 0.013237743  | 6.123290789 | 0.62659626  |
| DEFB127   | 0.01269923   | 5.986913122 | 0.626628496 |
| PDE6H     | -0.016547845 | 6.110225618 | 0.626779806 |
| LOC644311 | 0.010229943  | 6.086958127 | 0.62684452  |
| SEPT1     | 0.009147031  | 6.218413697 | 0.62700202  |
| NFKBIL1   | -0.021706095 | 6.0478553   | 0.627030161 |
| ANTXR1    | -0.013610893 | 5.942256211 | 0.627127289 |
| BAI1      | 0.007147522  | 6.060397655 | 0.62724486  |
| C6ORF195  | -0.013269761 | 6.139093317 | 0.627255086 |
| NUDCD3    | -0.025415067 | 8.567224891 | 0.62726344  |
| TTY17A    | -0.007688482 | 6.060973361 | 0.627287905 |
| LOC399715 | 0.007394448  | 6.076541092 | 0.627364617 |
| LOC653210 | 0.006989472  | 6.097709649 | 0.627430857 |
| MRGPRE    | 0.013610909  | 6.194064569 | 0.62750966  |
| LOC648138 | -0.013109797 | 6.064909418 | 0.627643708 |
| ARSF      | 0.012015131  | 5.966787136 | 0.627736513 |
| STK17A    | 0.013170031  | 6.252394205 | 0.627840982 |

## DEG.infomation

|           |              |             |             |
|-----------|--------------|-------------|-------------|
| DIRC1     | 0.012905815  | 6.031948853 | 0.627981815 |
| LOC651923 | -0.011934232 | 6.109947963 | 0.628012502 |
| ACOT9     | -0.02419631  | 8.653597751 | 0.628033731 |
| LOC652216 | 0.012119587  | 5.95745627  | 0.628083388 |
| ORMDL1    | 0.02858033   | 7.976635083 | 0.628186176 |
| RFK       | -0.014493958 | 6.482410831 | 0.628396095 |
| SLCO6A1   | 0.01366362   | 5.967655039 | 0.628407216 |
| FCAMR     | -0.010299321 | 6.03895822  | 0.628439822 |
| SCARF1    | -0.009773502 | 6.138379988 | 0.628462907 |
| GGT6      | -0.011352712 | 6.109213158 | 0.628487214 |
| LOC650387 | -0.014042743 | 6.104256585 | 0.628641932 |
| LOC649504 | -0.01187477  | 6.05752806  | 0.628933187 |
| HSF2BP    | -0.012971958 | 6.199791865 | 0.628958101 |
| FLJ31401  | 0.009128753  | 5.947248217 | 0.629008737 |
| C21ORF100 | 0.014727886  | 6.063463366 | 0.629058915 |
| LOC392506 | 0.010831401  | 6.079614797 | 0.629159571 |
| LOC642506 | -0.010990739 | 5.944836456 | 0.629190062 |
| FCHSD1    | 0.009617     | 6.057633718 | 0.629211104 |
| SYNC1     | -0.035593351 | 7.669705547 | 0.629304226 |
| LOC646992 | 0.011115268  | 6.061251703 | 0.629310476 |
| KRTAP5-2  | 0.014166681  | 5.963544719 | 0.629522158 |
| RTKN2     | 0.013709373  | 5.964547961 | 0.629595815 |
| FAM3D     | 0.012519186  | 6.119880943 | 0.629632121 |
| FAM47B    | -0.008292802 | 6.086373968 | 0.629643054 |
| LOC645217 | 0.013949287  | 6.345299047 | 0.629770094 |
| LOC646960 | 0.010770442  | 6.016784389 | 0.629842339 |
| SLC26A5   | 0.007138155  | 6.013591659 | 0.629864262 |
| PCTK2     | 0.018413872  | 6.225218809 | 0.630181793 |
| IQUB      | 0.01307362   | 6.102725292 | 0.630268694 |
| LOC651301 | 0.012101217  | 6.099681471 | 0.630358229 |
| CEACAM4   | 0.012541097  | 6.213917222 | 0.630358494 |
| COL17A1   | -0.015604262 | 6.321507015 | 0.63036203  |
| CST8      | 0.011908658  | 6.050947554 | 0.63048962  |
| ARL5C     | 0.012049605  | 6.112112071 | 0.630494886 |
| SLC35D1   | 0.012852827  | 6.14402086  | 0.630875594 |
| SLC4A1    | -0.012691186 | 5.933037675 | 0.630913657 |
| DLX1      | 0.008043206  | 6.218901576 | 0.63096862  |
| CCNB3     | 0.007877275  | 6.002390874 | 0.63106609  |
| LOC647544 | 0.01108262   | 6.080908337 | 0.631066266 |
| ZCCHC12   | 0.016535322  | 5.965374463 | 0.631115316 |
| SLFN5     | 0.020408374  | 6.385621162 | 0.631367531 |
| LOC650680 | -0.011662416 | 6.055549226 | 0.631372136 |
| AQP8      | -0.011329196 | 5.979000741 | 0.631380173 |
| TBX19     | 0.010625085  | 6.429550495 | 0.63143378  |
| LOC284998 | -0.010850585 | 6.161045079 | 0.631625254 |
| LOC728276 | -0.010020148 | 6.028649663 | 0.63164549  |
| MGC27382  | 0.02006346   | 6.092275087 | 0.631651179 |
| LOC731196 | 0.010549843  | 6.171617702 | 0.631674181 |
| PGLYRP2   | -0.012407646 | 6.017778574 | 0.631681989 |
| LOC652656 | 0.010989779  | 6.165055185 | 0.631759972 |
| LOC729533 | -0.015378029 | 6.134731537 | 0.631862018 |

## DEG.infomation

|           |              |             |             |
|-----------|--------------|-------------|-------------|
| LOC644596 | 0.013654888  | 6.280779638 | 0.631916423 |
| SMS       | -0.031479387 | 9.588787997 | 0.631940675 |
| OR4K13    | -0.011270242 | 6.116957742 | 0.632188251 |
| GOLGA8E   | 0.008022288  | 5.963648439 | 0.632209704 |
| SEPT6     | 0.013377917  | 6.469272902 | 0.632842561 |
| LOC642520 | -0.012494278 | 6.142865851 | 0.632845435 |
| SOHLH1    | -0.012299051 | 5.892401182 | 0.632859022 |
| HSPC072   | 0.012886569  | 5.992631525 | 0.632872387 |
| PKNOX1    | 0.020161503  | 6.520677697 | 0.632882885 |
| LOC650212 | 0.011651893  | 5.933034082 | 0.632923948 |
| HORMAD2   | -0.011171423 | 6.025406868 | 0.632980748 |
| FGFBP1    | -0.012018891 | 5.952402081 | 0.633153264 |
| LOC644885 | 0.013553305  | 5.944836779 | 0.633179777 |
| LOC644593 | -0.013513571 | 6.089702979 | 0.633327858 |
| FDPS      | -0.028568666 | 7.515035875 | 0.633339562 |
| RAB40A    | 0.013747931  | 5.964636151 | 0.633409321 |
| LOC651747 | -0.013060818 | 6.057586904 | 0.633441032 |
| LOC641953 | 0.011558317  | 6.072899559 | 0.633493738 |
| SLC23A3   | 0.013490765  | 6.128773169 | 0.633507025 |
| FAM48B1   | 0.010614909  | 6.08856193  | 0.633541861 |
| TMEM145   | 0.016535783  | 6.430565386 | 0.633706496 |
| GPR17     | -0.012099733 | 6.062312602 | 0.633764757 |
| LOC647865 | 0.014369751  | 5.942004515 | 0.633912143 |
| LOC652797 | 0.011048808  | 5.969846786 | 0.633960845 |
| LOC649044 | -0.007935263 | 6.29206669  | 0.633973794 |
| LOC158318 | -0.011985441 | 6.253163995 | 0.634116818 |
| LOC650247 | 0.012676539  | 6.080166266 | 0.634163258 |
| CCDC122   | 0.009646287  | 6.221043319 | 0.634195843 |
| GABRG1    | -0.01259027  | 5.969631754 | 0.634345856 |
| LOC649151 | -0.014795702 | 6.031766201 | 0.634708934 |
| LOC642083 | 0.011560077  | 6.083798408 | 0.634898261 |
| PRL       | -0.012847983 | 5.915233055 | 0.634931799 |
| LOC650399 | -0.012961863 | 5.889339926 | 0.634973367 |
| LYSMD3    | -0.013492776 | 6.252342308 | 0.634983739 |
| LOC441847 | 0.011947825  | 6.022820168 | 0.635016793 |
| RS1       | -0.011373299 | 6.017474716 | 0.635237953 |
| KIAA1086  | -0.014715809 | 6.23789812  | 0.635491929 |
| TFF2      | 0.013480163  | 6.017791469 | 0.635560522 |
| LOC649477 | -0.01453138  | 5.977377023 | 0.635661908 |
| LOC644338 | 0.01053216   | 6.056534069 | 0.635709021 |
| LOC648585 | -0.008057908 | 6.106771767 | 0.635826603 |
| UPK3A     | -0.013671971 | 6.118774158 | 0.635860977 |
| LOC392425 | 0.01308073   | 5.936172217 | 0.635916392 |
| HSP90AB6P | 0.011985694  | 6.049168698 | 0.636039457 |
| CELSR3    | 0.013180822  | 6.149630558 | 0.636093452 |
| OR1A2     | -0.011869516 | 6.023178892 | 0.636149361 |
| MYO16     | 0.04704189   | 7.473540554 | 0.636186454 |
| CALM1     | 0.022731471  | 12.31425099 | 0.636289888 |
| OR2S2     | -0.01087902  | 5.931770225 | 0.636586783 |
| TCHHL1    | -0.013597022 | 5.876856818 | 0.636616665 |
| LOC652690 | 0.01154558   | 5.993193904 | 0.636663116 |

## DEG.infomation

|           |              |             |             |
|-----------|--------------|-------------|-------------|
| NDUFA1    | 0.018835035  | 14.1125454  | 0.63668108  |
| DIS3L2    | 0.013905768  | 7.189650691 | 0.636813832 |
| LOC732040 | -0.013850482 | 6.054157338 | 0.637037502 |
| CLUL1     | 0.007405799  | 6.081702952 | 0.63703822  |
| C11ORF9   | 0.012119832  | 6.006229648 | 0.637138341 |
| LOC652542 | -0.01248636  | 5.95843528  | 0.637387994 |
| LOC388327 | -0.006094094 | 6.105208467 | 0.637560554 |
| LOC729601 | 0.010782116  | 6.107805614 | 0.637567425 |
| CCDC108   | 0.010612173  | 5.965671636 | 0.637807325 |
| LOC642564 | -0.01368035  | 5.954933333 | 0.637956885 |
| INSIG2    | 0.01652742   | 8.241680948 | 0.638091122 |
| LOC647237 | -0.012586027 | 5.983265892 | 0.638133068 |
| FRG2      | 0.007644449  | 5.998510399 | 0.638165584 |
| SULT4A1   | 0.010766568  | 5.958465725 | 0.638208077 |
| LOC729792 | 0.011997426  | 6.144116774 | 0.638364106 |
| LOC389827 | -0.009530573 | 6.078705494 | 0.638368983 |
| LOC651754 | -0.010929267 | 6.099430791 | 0.638404348 |
| ABCB11    | -0.01148356  | 6.172809025 | 0.638490259 |
| TAF2      | -0.017324858 | 7.29096696  | 0.638498812 |
| LOC642948 | 0.012490113  | 5.975130585 | 0.638501759 |
| PGLYRP1   | -0.01321595  | 6.208705486 | 0.638648178 |
| ZNF831    | -0.009140455 | 5.983963568 | 0.638668371 |
| LOC390564 | -0.011680143 | 5.936683778 | 0.638827003 |
| LOC652687 | -0.011270891 | 6.103549412 | 0.638840036 |
| LOC644411 | 0.012934446  | 6.023170539 | 0.638849297 |
| RGS7      | 0.013345973  | 5.991075158 | 0.63891768  |
| MBD1      | 0.01492684   | 7.022004605 | 0.639123171 |
| LOC644482 | 0.029550764  | 7.295460804 | 0.639132339 |
| HTF9C     | 0.008568216  | 6.333527008 | 0.639134984 |
| LOC643082 | -0.012103975 | 5.931688336 | 0.639241724 |
| PPY       | 0.01169485   | 5.99380467  | 0.639334366 |
| OR2M5     | 0.012910583  | 6.026930295 | 0.639389185 |
| LOC644371 | 0.012518574  | 6.047538335 | 0.639606703 |
| NUFIP1    | 0.013005328  | 6.254140403 | 0.639620311 |
| OR5K1     | 0.01226805   | 6.022607705 | 0.639663313 |
| LOC646223 | -0.015279188 | 6.02654697  | 0.639688428 |
| LOC642720 | 0.012909605  | 5.994881996 | 0.639803756 |
| KIAA1958  | -0.016857073 | 6.307930059 | 0.639826224 |
| PUNC      | 0.011805755  | 5.970875228 | 0.639961417 |
| FLJ43826  | -0.010796479 | 5.937722754 | 0.639987018 |
| SPEN      | 0.017343802  | 9.169806258 | 0.640039622 |
| LOC651371 | 0.013245746  | 6.188507013 | 0.640083466 |
| LOC642141 | -0.011173121 | 6.020349959 | 0.64021842  |
| TTY9B     | 0.011618485  | 6.039830221 | 0.64024108  |
| LOC653648 | 0.018286183  | 5.948886369 | 0.640263588 |
| AFARP1    | -0.008561786 | 6.043173479 | 0.640657239 |
| LOC652825 | 0.011113322  | 6.076165924 | 0.640658623 |
| LOC642621 | 0.01257206   | 6.158602151 | 0.641004127 |
| SAMD7     | 0.013446998  | 6.347108724 | 0.641078594 |
| EIF4E     | -0.015709113 | 6.30371078  | 0.641145176 |
| GBP4      | 0.045251307  | 8.219388735 | 0.641178373 |

## DEG.infomation

|           |              |             |             |
|-----------|--------------|-------------|-------------|
| DDX49     | 0.031627608  | 6.24990381  | 0.641292084 |
| OXER1     | 0.012909208  | 6.080070474 | 0.641387597 |
| NUDT9     | 0.016558214  | 8.23430469  | 0.641409339 |
| TULP4     | 0.015706445  | 7.195138004 | 0.641492856 |
| DEFB112   | 0.011508985  | 5.993914462 | 0.641649603 |
| TBX18     | -0.007911581 | 6.22915613  | 0.641714371 |
| CXORF22   | 0.012322611  | 6.015495868 | 0.641917    |
| EP400NL   | -0.007788845 | 6.062781716 | 0.641976553 |
| ZFAT      | 0.009547601  | 6.265453123 | 0.641982221 |
| LOC441237 | 0.013120058  | 6.053840267 | 0.641988462 |
| DLG1      | -0.018421276 | 6.17154584  | 0.642061716 |
| FOXP3     | 0.016342743  | 5.98396142  | 0.642116878 |
| LOC647083 | 0.011847545  | 6.248035744 | 0.642127803 |
| LOC643402 | 0.013228049  | 6.178265441 | 0.642216704 |
| FLJ32784  | -0.008572138 | 6.108196201 | 0.642233358 |
| SLCO1B3   | 0.011592097  | 5.958205506 | 0.642236204 |
| ACPL2     | -0.036240867 | 8.009875199 | 0.642281259 |
| GJB5      | 0.013987351  | 5.894234956 | 0.642290176 |
| LOC650677 | 0.007240998  | 6.12429186  | 0.642297882 |
| HLA-DOA   | -0.028363035 | 6.780299507 | 0.642364819 |
| NPIP      | 0.021358989  | 8.244609052 | 0.642386264 |
| LOC646457 | -0.012539113 | 6.066796723 | 0.642389051 |
| BLOC1S3   | 0.012241575  | 6.038880123 | 0.642420366 |
| CDY2B     | 0.015522876  | 5.986849144 | 0.642451947 |
| PERLD1    | 0.021225553  | 8.03748933  | 0.64275763  |
| HS1BP3    | -0.019265325 | 7.512381796 | 0.64284385  |
| ABCD2     | -0.008210387 | 6.047191883 | 0.642928085 |
| MGC24975  | 0.012934035  | 6.385443491 | 0.642935171 |
| MRPL18    | 0.017489268  | 10.15201062 | 0.643058745 |
| GRIK5     | 0.012197999  | 6.178750242 | 0.64312628  |
| LOC400950 | 0.009457409  | 6.026258876 | 0.643165817 |
| SAG       | 0.011257358  | 5.976914549 | 0.64316836  |
| LOC644707 | -0.01073473  | 6.038430237 | 0.643406859 |
| OR10J5    | 0.011984115  | 6.036264584 | 0.643506251 |
| LOC649703 | 0.011151899  | 6.132066778 | 0.643514133 |
| LOC653303 | 0.007602204  | 6.213764629 | 0.643520133 |
| HSD3B1    | -0.011116833 | 6.087447473 | 0.643523259 |
| LOC338750 | 0.016883416  | 6.116627819 | 0.643552851 |
| LOC643713 | 0.012464349  | 6.39023654  | 0.643556176 |
| LOC285577 | 0.010030326  | 6.324680103 | 0.643662269 |
| LOC641999 | 0.011598416  | 5.866415176 | 0.643678134 |
| PRIM2A    | 0.009616548  | 6.261622154 | 0.643681343 |
| HOXA1     | -0.009249701 | 6.130016006 | 0.643756983 |
| NTSR1     | 0.01220056   | 6.171414512 | 0.643789236 |
| LOC504188 | -0.011654496 | 6.150370913 | 0.643828025 |
| SPANXN4   | 0.012864089  | 5.866396935 | 0.643839285 |
| ARL6IP6   | -0.012987344 | 6.747794686 | 0.64401345  |
| MAGEA11   | -0.008872393 | 6.056352015 | 0.644053014 |
| SHOX      | 0.007236196  | 6.045182411 | 0.644108664 |
| FLJ40453  | -0.01071934  | 6.037808112 | 0.644165048 |
| LOC729373 | 0.01150096   | 6.056406501 | 0.644195371 |



## DEG.infomation

|           |              |             |             |
|-----------|--------------|-------------|-------------|
| TTC7A     | 0.012650008  | 6.232269533 | 0.64452084  |
| TNFSF11   | 0.007701231  | 6.052919656 | 0.644550534 |
| LOC646084 | -0.010841188 | 6.15764844  | 0.644568802 |
| BRD9      | 0.015613382  | 8.829314607 | 0.644591804 |
| PRAMEF12  | -0.012397411 | 6.0042949   | 0.644596983 |
| CKMT1A    | -0.010575465 | 6.095617352 | 0.64465861  |
| CALML6    | -0.014240033 | 6.0244141   | 0.644745619 |
| PRIMA1    | -0.009412515 | 6.066475348 | 0.644916205 |
| LOC648262 | 0.011008874  | 5.974097376 | 0.644917164 |
| LRRC61    | -0.012226405 | 6.091832631 | 0.644984471 |
| LOC643590 | -0.012998368 | 6.31479835  | 0.645218291 |
| LOC653706 | -0.015677255 | 5.95492512  | 0.64525268  |
| LOC649951 | 0.011770068  | 6.000749867 | 0.64527126  |
| IL22RA1   | 0.010509465  | 6.067066444 | 0.645330407 |
| FRRS1     | 0.01050207   | 6.457402991 | 0.645369497 |
| FNBP1L    | -0.034886408 | 7.70770856  | 0.645501322 |
| LOC643905 | 0.015477868  | 6.117715031 | 0.645538686 |
| RASA4     | 0.012071847  | 6.051964082 | 0.645743269 |
| C19ORF40  | 0.013307701  | 6.293588743 | 0.645855433 |
| OR8J3     | -0.00770118  | 6.100329963 | 0.645953151 |
| KRT13     | -0.01161301  | 6.031092201 | 0.645962171 |
| NR0B1     | 0.011736833  | 6.194659857 | 0.645975752 |
| KIR3DL3   | 0.007559126  | 6.075320007 | 0.6460292   |
| LOC652292 | 0.012054369  | 5.9202342   | 0.646029949 |
| HOXA13    | -0.01095903  | 5.963965744 | 0.646065274 |
| C10ORF27  | 0.011251821  | 6.206238401 | 0.646104147 |
| PCDHB18   | -0.013345139 | 6.264232671 | 0.646219255 |
| CHAT      | -0.006780106 | 6.128634635 | 0.646228657 |
| RP1L1     | -0.013281186 | 6.130680882 | 0.646276488 |
| PPP1R9B   | 0.013519179  | 6.105175989 | 0.646293041 |
| P11       | 0.013521555  | 6.491315722 | 0.646413761 |
| CCT8      | 0.019785484  | 11.13125071 | 0.646517054 |
| REG3G     | 0.008522652  | 6.029735309 | 0.646596541 |
| HIST1H2BO | 0.011838404  | 6.027251311 | 0.64659696  |
| LOC650646 | -0.028967025 | 12.45374111 | 0.64669897  |
| LOC651577 | 0.01069604   | 6.05197615  | 0.646713446 |
| CTAG1A    | -0.008616133 | 5.996440978 | 0.646728937 |
| C1ORF166  | 0.018362402  | 7.783645042 | 0.646759141 |
| LOC651751 | -0.015249879 | 6.126950803 | 0.646824986 |
| SIPA1L2   | -0.042233446 | 10.93117603 | 0.646858529 |
| CCDC69    | -0.027539849 | 7.125374721 | 0.646919529 |
| LOC647471 | -0.012110322 | 6.033532689 | 0.646971028 |
| LOC653625 | 0.012713884  | 6.306952795 | 0.647020578 |
| LOC284837 | 0.012878408  | 5.929892806 | 0.647027599 |
| POLK      | -0.011453075 | 6.019649937 | 0.647092369 |
| IL11      | -0.012895919 | 6.015735526 | 0.647196915 |
| LOC644532 | 0.013601912  | 6.04733297  | 0.64722096  |
| ADAMTS19  | -0.01368793  | 6.324979622 | 0.647226586 |
| CRLF1     | 0.031518645  | 6.89285869  | 0.647458572 |
| ZNF696    | 0.015698509  | 6.916727341 | 0.647511429 |
| LOC652418 | 0.013860603  | 6.208867651 | 0.6475138   |

## DEG.infomation

|           |              |             |             |
|-----------|--------------|-------------|-------------|
| C21ORF121 | 0.012913978  | 6.115047786 | 0.647521005 |
| LOC651140 | 0.011142033  | 6.172751299 | 0.647643624 |
| LOC645946 | -0.011380493 | 5.959599035 | 0.647941714 |
| VWA3B     | -0.010737753 | 6.260476192 | 0.647956482 |
| NEK4      | 0.011421231  | 6.205418622 | 0.647966113 |
| HIP1      | -0.017806119 | 6.917898028 | 0.647998313 |
| OR6M1     | 0.012152735  | 5.977194655 | 0.648001545 |
| LOC652537 | -0.012163752 | 6.363943324 | 0.648016915 |
| LRTM2     | -0.011940045 | 6.195707494 | 0.648084633 |
| FAM154A   | 0.012046635  | 6.013134711 | 0.648221398 |
| LOC651524 | -0.011139443 | 5.875928996 | 0.648314493 |
| TDRKH     | 0.012054844  | 6.200703519 | 0.648419548 |
| LOC649107 | -0.010831681 | 6.020843467 | 0.648433335 |
| DLX2      | -0.010622832 | 6.100410311 | 0.648529561 |
| NEGR1     | 0.010836819  | 6.160182203 | 0.648679709 |
| KRTAP12-2 | -0.011322165 | 6.134996035 | 0.648846673 |
| LOC93349  | 0.012585979  | 6.013348522 | 0.648933976 |
| ANKRD42   | -0.013067906 | 5.985176544 | 0.648988156 |
| LOC650227 | 0.021336341  | 6.039122326 | 0.649326033 |
| TRIM9     | 0.011174044  | 6.401764032 | 0.649351349 |
| MYBL2     | 0.017144385  | 6.021890038 | 0.649359571 |
| LOC651324 | -0.014015583 | 6.066599421 | 0.649368031 |
| GTF2IRD1  | -0.014897841 | 6.678882244 | 0.649682267 |
| RNASE4    | -0.02150158  | 7.314701295 | 0.649766934 |
| TEDDM1    | 0.01384901   | 6.204123111 | 0.649809514 |
| KIAA0494  | -0.018773364 | 9.327614167 | 0.649943976 |
| PC-3      | 0.01002733   | 6.113461119 | 0.650207828 |
| BMI1      | 0.023239544  | 9.190245518 | 0.650279424 |
| C6ORF208  | -0.01046065  | 6.171031145 | 0.650281489 |
| LOC388255 | 0.01705686   | 5.978713705 | 0.65028779  |
| SLC16A13  | -0.01289481  | 6.15868162  | 0.650395735 |
| LOC148003 | -0.012925767 | 6.046796132 | 0.650444486 |
| TRAF4     | -0.009485057 | 5.978143671 | 0.650491537 |
| RARS      | -0.017360357 | 10.06387979 | 0.650520802 |
| TRIM54    | 0.029663839  | 8.802269964 | 0.650524873 |
| LOC642888 | 0.011489626  | 6.011689154 | 0.650695916 |
| PTGER1    | 0.012289558  | 6.182909086 | 0.650739179 |
| NXF3      | -0.012652626 | 6.136840456 | 0.650740579 |
| GTSF1L    | 0.008176788  | 6.032849756 | 0.650748286 |
| LOC652582 | -0.010569743 | 6.118411132 | 0.650843823 |
| NAIP      | -0.006935963 | 6.114783814 | 0.650947257 |
| LOC645777 | 0.011617025  | 5.924897057 | 0.650966413 |
| LOC653816 | -0.010832358 | 6.072174923 | 0.650994354 |
| ACOT12    | 0.013102174  | 6.139400541 | 0.651011471 |
| MUC3B     | -0.009077642 | 6.09772913  | 0.651309185 |
| LOC649414 | 0.01051217   | 5.980592614 | 0.6513918   |
| LOC644738 | -0.010594126 | 6.112689925 | 0.651407005 |
| LOC133874 | -0.010779946 | 6.045138239 | 0.651495476 |
| GPD1L     | 0.037248471  | 12.20492147 | 0.651515141 |
| FLJ12529  | 0.018980816  | 6.497167376 | 0.651553664 |
| LOC643324 | -0.012770196 | 6.143545957 | 0.651584034 |

## DEG.infomation

|           |              |             |             |
|-----------|--------------|-------------|-------------|
| SLC18A3   | -0.011789776 | 5.983844532 | 0.651609108 |
| FAM98B    | -0.007696836 | 6.141668347 | 0.651618721 |
| LOC442726 | 0.012682991  | 5.926908716 | 0.651639041 |
| LOC646470 | -0.012434302 | 5.94176914  | 0.65192849  |
| ARL6IP1   | 0.023296655  | 8.51029834  | 0.651960751 |
| LOC653645 | -0.010380837 | 6.047790474 | 0.652037207 |
| LOC650458 | -0.011151369 | 6.16780564  | 0.652214652 |
| LOC646312 | -0.01295181  | 6.160681132 | 0.652384897 |
| LOC644908 | 0.012991634  | 6.067278695 | 0.652510529 |
| MLL3      | -0.008875603 | 6.678506662 | 0.652534344 |
| OR5AK2    | -0.009935949 | 5.990219936 | 0.652660284 |
| LOC645620 | 0.012974903  | 5.964449765 | 0.652722273 |
| FOXJ1     | -0.020187785 | 6.056158685 | 0.652758905 |
| PRB1      | 0.006708334  | 6.064849639 | 0.652784218 |
| OR6X1     | 0.008115713  | 6.01604697  | 0.6528013   |
| LOC644715 | -0.02180742  | 6.374609448 | 0.652813212 |
| HRNBP3    | 0.013325938  | 5.974931045 | 0.652850428 |
| RBMV2FP   | -0.010816438 | 6.071889022 | 0.652917729 |
| AKAP5     | -0.012383591 | 5.988668569 | 0.653084265 |
| LOC648117 | 0.009488342  | 6.040098372 | 0.653246746 |
| SART1     | -0.010980628 | 6.234498539 | 0.653559095 |
| IL29      | -0.008190595 | 6.042269671 | 0.653583331 |
| LOC643927 | 0.01180423   | 5.847002753 | 0.653605642 |
| LOC643604 | -0.010411549 | 5.958584314 | 0.653619369 |
| VN1R2     | -0.00968311  | 6.148147674 | 0.653625929 |
| LOC646071 | -0.010597212 | 6.17948626  | 0.653669792 |
| SASS6     | -0.009880715 | 6.381358446 | 0.653720737 |
| LOC727958 | 0.010781193  | 6.064367769 | 0.653855195 |
| UEVLD     | 0.014307576  | 6.643405715 | 0.653861346 |
| LOC653832 | -0.007825222 | 6.078861483 | 0.653875513 |
| C8ORF42   | 0.010194012  | 6.13618883  | 0.653898991 |
| PRKAR2B   | -0.012250057 | 6.129607012 | 0.65395703  |
| LOC644735 | 0.012968109  | 6.150162107 | 0.653985315 |
| LOC643811 | -0.010684021 | 6.177716979 | 0.653987809 |
| C14ORF72  | 0.01057184   | 6.052802181 | 0.654229648 |
| B3GAT1    | -0.007331176 | 6.161555942 | 0.654303914 |
| TPCN2     | 0.025745269  | 7.29980524  | 0.65433907  |
| PQLC2     | 0.006757788  | 6.099465572 | 0.654401024 |
| GIN54     | -0.011451472 | 6.433667486 | 0.654504872 |
| PROCA1    | 0.015738392  | 6.075036008 | 0.654604334 |
| LOC646549 | -0.010244817 | 6.005798735 | 0.654715173 |
| LOC644345 | 0.010654132  | 6.037909731 | 0.654806519 |
| LOC642473 | 0.010125333  | 6.036793076 | 0.654816732 |
| AK1       | -0.033140521 | 10.26592912 | 0.654846239 |
| LOC642196 | 0.011847565  | 5.916804209 | 0.654887371 |
| LOC652512 | -0.010618311 | 6.11922967  | 0.654888528 |
| LOC646515 | 0.01179125   | 6.166115429 | 0.655013012 |
| LOC646931 | 0.01050168   | 6.047009264 | 0.655353516 |
| GPRIN1    | -0.013403209 | 5.954568869 | 0.655359778 |
| LOC642922 | 0.012566774  | 6.075512814 | 0.65537928  |
| CXCR3     | 0.013589438  | 6.128469189 | 0.655386079 |

## DEG.infomation

|           |              |             |             |
|-----------|--------------|-------------|-------------|
| LOC388438 | 0.011333742  | 6.077249215 | 0.655403591 |
| LOC653111 | 0.013779463  | 6.327239586 | 0.655419087 |
| OR1N2     | 0.011465765  | 6.055894982 | 0.655420184 |
| MMP26     | -0.012611908 | 6.067930796 | 0.655437067 |
| LOC646654 | 0.010719779  | 5.968626692 | 0.655462397 |
| CD8B      | -0.006021837 | 5.996247904 | 0.655543525 |
| PARD6A    | -0.01366378  | 6.584162458 | 0.655774983 |
| KIAA1975  | -0.010712534 | 6.073263354 | 0.65588383  |
| LOC651128 | 0.01028007   | 5.982751674 | 0.655931211 |
| SLC5A3    | -0.014222546 | 6.131471014 | 0.655942204 |
| LOC339524 | 0.010614286  | 6.068591785 | 0.655973504 |
| PYDC2     | 0.012029079  | 6.08650394  | 0.655984255 |
| TBC1D22A  | 0.019515617  | 6.188518364 | 0.656032011 |
| RHDF1     | -0.024653598 | 10.16761758 | 0.656160202 |
| HLA-DRB1  | 0.119528937  | 7.40229684  | 0.656230829 |
| PAGE2B    | -0.012920318 | 6.031531613 | 0.656260625 |
| TMEM64    | -0.011835193 | 6.463864496 | 0.656316592 |
| A1BG      | 0.009123176  | 6.217095601 | 0.656491702 |
| LOC645183 | -0.011459133 | 6.234553386 | 0.656552289 |
| DUOX2     | -0.01291148  | 5.98398373  | 0.656623384 |
| LOC145845 | 0.009973418  | 6.025791025 | 0.656664224 |
| MGC15885  | 0.010473697  | 5.97971133  | 0.656764302 |
| CCNO      | -0.017169544 | 6.215319998 | 0.657001434 |
| LOC645408 | -0.010583319 | 5.998960038 | 0.657092889 |
| LOC642639 | 0.011728094  | 6.031389061 | 0.657141269 |
| C8ORF13   | 0.011971648  | 6.028041701 | 0.657202022 |
| LOC654020 | -0.011179577 | 6.309266765 | 0.657243039 |
| TNRC18    | -0.009584482 | 6.244521523 | 0.657278039 |
| GYS2      | 0.010368571  | 6.069889267 | 0.657420769 |
| PLCL1     | 0.03126209   | 8.138925702 | 0.657496686 |
| LOC389834 | 0.032300451  | 6.573234077 | 0.657567737 |
| OR2A2     | 0.009581334  | 6.127686717 | 0.657585497 |
| KCNJ16    | 0.009634848  | 6.408553399 | 0.657592421 |
| LOC650755 | 0.01710674   | 6.039240292 | 0.657692801 |
| RILPL1    | -0.024517751 | 10.82953157 | 0.65779428  |
| LOC148203 | -0.012315189 | 5.944242588 | 0.65785592  |
| NPDC1     | -0.024630898 | 7.057576458 | 0.65786381  |
| GAGE7     | -0.021840969 | 6.200563253 | 0.657936605 |
| LOC652763 | 0.011419708  | 6.078683116 | 0.657942257 |
| CERCAM    | 0.026041535  | 6.926203585 | 0.657951451 |
| HSPA9     | 0.052709625  | 10.37807853 | 0.658220228 |
| C10ORF107 | 0.011294792  | 6.065704459 | 0.658324452 |
| LOC206227 | 0.0104968    | 5.952474961 | 0.658427773 |
| DUOXA1    | -0.012094849 | 5.988673301 | 0.65846706  |
| LOC440414 | -0.01052409  | 6.057578265 | 0.658481728 |
| LOC644830 | -0.011463281 | 6.052133256 | 0.658789101 |
| LOC648738 | -0.01090817  | 5.989715117 | 0.65890977  |
| LOC650241 | -0.011057464 | 6.08197868  | 0.658978377 |
| LOC649086 | -0.010756867 | 6.091463532 | 0.659113525 |
| FAM64A    | -0.012822754 | 6.022140435 | 0.659131549 |
| HTR5A     | 0.010655891  | 5.93686408  | 0.659242468 |

## DEG.infomation

|           |              |             |             |
|-----------|--------------|-------------|-------------|
| PARP15    | -0.012558507 | 5.971206556 | 0.659284769 |
| SLC4A11   | -0.010954593 | 6.233737815 | 0.659346674 |
| LOC646156 | -0.011305577 | 5.991750146 | 0.659536237 |
| LOC116349 | -0.011407747 | 6.106253414 | 0.659676636 |
| STOML3    | -0.011613804 | 6.100025059 | 0.659749917 |
| LOC644982 | -0.010995889 | 6.011724208 | 0.659873755 |
| TWIST1    | 0.019139658  | 8.349939478 | 0.659903379 |
| OR56A3    | -0.012307637 | 5.929948451 | 0.659926656 |
| HIST1H2BJ | -0.021690216 | 8.438475694 | 0.659928036 |
| ZNF107    | 0.008324385  | 6.037287818 | 0.660038769 |
| FLJ37453  | 0.014718211  | 6.413805514 | 0.660065067 |
| LOC647568 | -0.011262766 | 6.29100113  | 0.660322979 |
| UFSP1     | -0.01565267  | 6.275831383 | 0.660425643 |
| LOC650257 | 0.011846585  | 5.987258012 | 0.660476626 |
| LOC127602 | 0.005420675  | 6.080537317 | 0.660685879 |
| RNASE11   | -0.010520915 | 6.092546496 | 0.660796103 |
| HRNR      | -0.012680499 | 6.069753006 | 0.660866971 |
| ABCB5     | -0.012400074 | 5.883988189 | 0.66088679  |
| LOC650846 | -0.009880957 | 6.134493825 | 0.660934289 |
| TAS2R8    | -0.008522029 | 6.032986479 | 0.660954778 |
| LOC651565 | -0.014273404 | 5.983935694 | 0.660973637 |
| HYPB      | 0.010192048  | 6.057962155 | 0.661034892 |
| OR13C9    | -0.007742229 | 6.135666503 | 0.661131708 |
| DAZAP2    | -0.022468249 | 12.30728367 | 0.661278857 |
| LOC644891 | 0.012564766  | 6.083596377 | 0.661315031 |
| LOC649659 | -0.010381314 | 6.077551422 | 0.661341709 |
| SPAM1     | -0.008591958 | 6.165589083 | 0.661534304 |
| NMUR1     | 0.011111823  | 6.090784783 | 0.661578384 |
| KIR3DP1   | 0.012250998  | 6.220785502 | 0.661656822 |
| MGC19604  | -0.010783493 | 6.105014781 | 0.661687629 |
| DEPDC6    | 0.017039691  | 6.956757159 | 0.661719385 |
| LOC653178 | -0.008202112 | 6.081606462 | 0.661958819 |
| SYDE1     | 0.019431071  | 7.353397288 | 0.661975335 |
| LOC643495 | 0.010567088  | 6.032497882 | 0.662053041 |
| EIF1AD    | 0.01822028   | 6.262928344 | 0.662084392 |
| KRTAP26-1 | -0.010438467 | 6.083432638 | 0.662166561 |
| C1ORF101  | 0.011252243  | 6.084154487 | 0.662206345 |
| GOLGA8G   | 0.006854212  | 5.956607263 | 0.66223933  |
| NOX5      | -0.010418679 | 6.150636002 | 0.662288269 |
| LOC440992 | 0.01021775   | 5.998196327 | 0.662328365 |
| CSNK2A1P  | -0.013928675 | 7.467834618 | 0.66234783  |
| C20ORF70  | 0.012449541  | 6.097668501 | 0.662349387 |
| CRYGN     | 0.015396594  | 6.030547454 | 0.662488397 |
| MGC13098  | 0.010323471  | 6.095373729 | 0.662513388 |
| LOC643330 | 0.010695269  | 5.941637854 | 0.662554935 |
| RPL30     | -0.025642246 | 12.50698755 | 0.662598947 |
| LOC651630 | 0.011622625  | 6.219332552 | 0.662609839 |
| LINGO1    | 0.013535065  | 6.339912727 | 0.662650481 |
| LOC646407 | -0.009071628 | 6.166517391 | 0.662713233 |
| GUCY2D    | 0.010640746  | 6.102760567 | 0.66275937  |
| MLANA     | -0.0099896   | 5.869018236 | 0.66289552  |

## DEG.infomation

|           |              |             |             |
|-----------|--------------|-------------|-------------|
| FADS1     | -0.024464054 | 7.938182441 | 0.662924577 |
| PARD3B    | 0.008491201  | 6.100673643 | 0.663130646 |
| ANKRD31   | -0.010396824 | 5.947655659 | 0.663255595 |
| PLGLA1    | -0.007178149 | 6.137657419 | 0.663489307 |
| LOC401354 | -0.010708614 | 6.225137605 | 0.663551455 |
| SPANXA2   | -0.010313263 | 6.083148947 | 0.663575786 |
| PAXIP1    | -0.013576198 | 7.78091636  | 0.663678588 |
| USP27X    | 0.009856937  | 6.169806261 | 0.663800033 |
| CECR2     | 0.010051252  | 6.08432055  | 0.663887826 |
| LOC645552 | -0.010276606 | 5.953113065 | 0.663928948 |
| MEIG1     | -0.00797675  | 5.967449304 | 0.663939564 |
| PRSS3     | 0.010395529  | 6.10370515  | 0.663940263 |
| LOC387646 | 0.012962525  | 6.058188103 | 0.664046369 |
| EFCAB6    | 0.007006315  | 6.121230877 | 0.664101689 |
| REG3A     | 0.009244969  | 5.979890898 | 0.66415395  |
| BIRC1     | 0.015151535  | 6.051109431 | 0.664178831 |
| EXTL3     | 0.025624984  | 8.575317746 | 0.66421317  |
| C1ORF140  | -0.010874959 | 6.100867288 | 0.664236804 |
| OR51A2    | 0.010043225  | 5.978969221 | 0.664251668 |
| SLAMF9    | -0.017130585 | 6.123405219 | 0.664258077 |
| LOC649990 | 0.014098357  | 6.207559809 | 0.664260633 |
| FLJ20920  | 0.018367302  | 6.552023213 | 0.664341861 |
| LOC391347 | 0.009851318  | 6.134003801 | 0.664460094 |
| LOC650759 | -0.011961962 | 6.257059574 | 0.664497816 |
| ACTR3B    | 0.007425965  | 6.183781263 | 0.664547659 |
| GOLGA2LY1 | 0.011525083  | 6.112861357 | 0.664636652 |
| SPON2     | -0.018166949 | 6.249148855 | 0.664668056 |
| SLC26A1   | -0.00608112  | 6.081978729 | 0.664761972 |
| LOC653596 | 0.006325553  | 6.199230781 | 0.664806386 |
| LOC643787 | -0.01074809  | 5.982323944 | 0.664940516 |
| CSN3      | -0.012075136 | 6.011129238 | 0.664973108 |
| LOC648456 | -0.009959329 | 6.157799136 | 0.664992662 |
| LOC642335 | -0.008069626 | 6.008048969 | 0.665027372 |
| ZBTB9     | 0.014514022  | 7.029591755 | 0.665180511 |
| LOC652355 | 0.007591594  | 5.960694381 | 0.665199814 |
| LOC642509 | 0.00973227   | 6.056735283 | 0.665234309 |
| C2ORF56   | 0.016632786  | 8.204842111 | 0.665334929 |
| TMEM185A  | 0.018634584  | 8.101376029 | 0.665368705 |
| FLJ22531  | 0.009968212  | 6.14829708  | 0.665439792 |
| MGAT4C    | 0.022969011  | 6.255566346 | 0.665507715 |
| CYP4F2    | 0.008066016  | 6.041970664 | 0.665513858 |
| LOC144678 | 0.010703188  | 6.023071254 | 0.665579753 |
| C21ORF87  | 0.010846096  | 6.003285469 | 0.665611614 |
| ADPRH     | -0.025120963 | 6.273660493 | 0.665632451 |
| PRODH     | 0.043556342  | 7.299531247 | 0.665681146 |
| TWISTNB   | 0.013372899  | 6.956098857 | 0.665730129 |
| PSPC1     | -0.013723437 | 7.207227779 | 0.66576331  |
| PTGES3    | 0.036841727  | 9.230819555 | 0.665801479 |
| APOC1     | 0.022574319  | 6.444922737 | 0.665806077 |
| SLC6A8    | 0.025708678  | 8.915992119 | 0.66582032  |
| COL5A2    | -0.045667002 | 8.591724673 | 0.665848202 |

## DEG.infomation

|           |              |             |             |
|-----------|--------------|-------------|-------------|
| HSD17B3   | 0.011501432  | 6.283329838 | 0.66598887  |
| LOC392145 | 0.010231296  | 6.450386569 | 0.666033042 |
| FLJ45422  | -0.007898698 | 6.13722271  | 0.666037321 |
| C10ORF63  | -0.007987599 | 6.049619496 | 0.666109644 |
| TCEAL5    | -0.014688777 | 6.10212028  | 0.666112421 |
| DPPA2     | -0.011244213 | 6.091461737 | 0.666169093 |
| LOC650488 | 0.012362574  | 5.878749594 | 0.666192648 |
| LOC651133 | 0.012526614  | 6.102141568 | 0.666245898 |
| LOC645139 | 0.011571556  | 5.974718783 | 0.666296327 |
| LOC652575 | 0.010117843  | 6.07951202  | 0.66636158  |
| CCL3L1    | -0.010206876 | 6.145614591 | 0.666382992 |
| LOC648926 | -0.011694144 | 6.30373624  | 0.666384627 |
| HOXC9     | 0.014326869  | 5.922214045 | 0.666529604 |
| LOC649618 | -0.01008123  | 6.205179906 | 0.666551054 |
| KCNA3     | -0.01267962  | 5.911231267 | 0.66668643  |
| SUPT7L    | 0.011701411  | 6.325838419 | 0.666743946 |
| LOC647444 | 0.008039182  | 6.014293807 | 0.66682249  |
| TTY7      | 0.009051911  | 6.038026118 | 0.666884598 |
| LOC645868 | 0.008910435  | 6.055731716 | 0.666887216 |
| LOC652211 | 0.010536252  | 6.174203555 | 0.666972952 |
| LOC647655 | 0.010342697  | 5.976051298 | 0.666980177 |
| LEPROT    | 0.02062051   | 10.18947297 | 0.667094931 |
| GGT1      | 0.005110991  | 6.136472933 | 0.667185083 |
| LOC646596 | 0.010636791  | 5.98304963  | 0.667480776 |
| LOC651774 | 0.009918843  | 5.987880174 | 0.667481311 |
| SPEG      | -0.018256277 | 6.09701359  | 0.667484308 |
| LOC729197 | 0.00982906   | 6.013676921 | 0.66755113  |
| LOC729639 | 0.012206478  | 6.133579202 | 0.667595452 |
| UGT1A5    | 0.014452669  | 6.163475264 | 0.667798846 |
| LOC649823 | 0.010429765  | 6.048020191 | 0.66784244  |
| RHOV      | 0.013974685  | 5.975470429 | 0.667876689 |
| VCY       | 0.008718166  | 6.086861727 | 0.667889057 |
| GJC3      | 0.013292105  | 6.110610279 | 0.667919895 |
| LOC642325 | -0.00817736  | 6.10011477  | 0.667920519 |
| LOC642938 | 0.010609521  | 6.080784898 | 0.667955445 |
| OR2A20P   | -0.009334703 | 6.161763575 | 0.667962591 |
| PANK3     | 0.015450608  | 6.666815953 | 0.668131098 |
| LOC646905 | 0.010304879  | 5.939182735 | 0.668144828 |
| SPATA1    | -0.012203652 | 6.082091536 | 0.668222767 |
| NFASC     | 0.005749824  | 6.170458012 | 0.668262969 |
| LOC284296 | -0.015299387 | 6.072055909 | 0.668305819 |
| ELMO1     | 0.008347582  | 6.519348225 | 0.668313397 |
| LOC650822 | -0.010828162 | 6.161545032 | 0.668429421 |
| ISOC2     | 0.025344248  | 8.285393848 | 0.668453349 |
| LOC653143 | -0.011173216 | 6.073379835 | 0.668457111 |
| LOC651008 | 0.009852658  | 6.133486444 | 0.668486402 |
| ZYG11A    | 0.007150066  | 6.017770866 | 0.668493986 |
| LOC644047 | -0.011831941 | 6.133323834 | 0.668568447 |
| VAX2      | 0.014001188  | 6.173429677 | 0.668762825 |
| KIAA0495  | -0.018239306 | 7.389388336 | 0.668950459 |
| CUL1      | 0.021013216  | 8.203607021 | 0.669155291 |

## DEG.infomation

|           |              |             |             |
|-----------|--------------|-------------|-------------|
| ACTL6B    | -0.011119159 | 6.113340909 | 0.669165812 |
| LOC651249 | 0.011320504  | 5.889325405 | 0.669236264 |
| LOC643300 | 0.021262974  | 6.595756303 | 0.669331009 |
| BUB3      | -0.016694887 | 8.609425036 | 0.669482558 |
| NBPF5     | 0.010785941  | 6.066401662 | 0.66954617  |
| C19ORF55  | 0.010749338  | 6.328159635 | 0.669576266 |
| LOC650491 | 0.015227935  | 5.944960188 | 0.669605495 |
| C3ORF32   | 0.018610255  | 6.559961789 | 0.669630238 |
| NEUROD6   | 0.010023379  | 6.087319664 | 0.669672341 |
| FOXO3     | -0.010745255 | 6.097976921 | 0.669693366 |
| CXCL13    | -0.014387232 | 5.946974308 | 0.669762347 |
| LOC255313 | 0.011174648  | 6.023450323 | 0.669803385 |
| TIMM13    | 0.021997375  | 6.030049821 | 0.670036683 |
| LOC644165 | 0.009999868  | 5.940533793 | 0.670114416 |
| CD244     | 0.01054468   | 6.173139061 | 0.670133859 |
| LOC646971 | 0.009601006  | 5.981661705 | 0.670258326 |
| FLG       | -0.011866431 | 5.930483888 | 0.670351306 |
| CEACAM8   | -0.010495701 | 5.927858224 | 0.670355484 |
| LOC650975 | 0.010313024  | 6.084709681 | 0.670360919 |
| YKT6      | 0.015156506  | 5.975478536 | 0.670407589 |
| LOC642077 | 0.011319122  | 6.19977098  | 0.670498024 |
| LOC646887 | 0.009742927  | 6.105343736 | 0.670541509 |
| BHLHB2    | 0.055734657  | 9.761490894 | 0.67070875  |
| SOX5      | 0.006005607  | 6.023468051 | 0.670809087 |
| SPRY3     | -0.011028198 | 6.085195546 | 0.670879172 |
| LOC387701 | 0.011230679  | 6.057650591 | 0.671039071 |
| HTR3B     | 0.014074752  | 6.079474134 | 0.671087686 |
| NETO1     | -0.006025005 | 6.014321067 | 0.671154466 |
| USE1      | 0.018923648  | 7.334829898 | 0.671185604 |
| OBP2A     | -0.012560785 | 6.190441733 | 0.671203666 |
| LOC643449 | -0.007479509 | 6.05877039  | 0.671249932 |
| CNTF      | 0.01045473   | 6.024284451 | 0.671362174 |
| NLE1      | -0.008576739 | 6.266184051 | 0.671375846 |
| FAM71A    | -0.018431579 | 6.068664093 | 0.671460174 |
| LOC645769 | -0.007441733 | 5.949249487 | 0.671577924 |
| GSC       | 0.01575894   | 6.143844836 | 0.671711583 |
| DMRT1     | -0.01143943  | 5.975167522 | 0.671947904 |
| ANKRD53   | -0.010481964 | 6.170127461 | 0.672291235 |
| LOC645010 | -0.011080053 | 5.945697852 | 0.672434849 |
| BCMO1     | -0.009606494 | 5.949476731 | 0.672492211 |
| KRT82     | 0.011647499  | 5.976541548 | 0.672666798 |
| LOC642106 | -0.012862208 | 5.903412061 | 0.672687729 |
| LOC648460 | -0.009722295 | 6.129958528 | 0.672712388 |
| CYP2A13   | 0.007607856  | 6.06133133  | 0.672767036 |
| GPR135    | 0.008301969  | 6.070677626 | 0.673017502 |
| FAS       | -0.009881339 | 6.108790902 | 0.673057112 |
| H3F3B     | 0.023412986  | 9.30178688  | 0.67306325  |
| LOC651219 | -0.012046162 | 6.021473166 | 0.673083187 |
| NBR2      | 0.019621502  | 6.05147612  | 0.673110968 |
| LOC643378 | -0.011675883 | 5.939100952 | 0.673123954 |
| NXPH3     | 0.014295704  | 6.364397372 | 0.673180587 |



## DEG.infomation

|           |              |             |             |
|-----------|--------------|-------------|-------------|
| LOC648200 | -0.010510232 | 6.156983986 | 0.673187225 |
| LOC390738 | -0.010594133 | 5.960419402 | 0.673188633 |
| LOC732226 | 0.010004219  | 5.995844026 | 0.673351173 |
| LOC642918 | 0.006769034  | 5.984498699 | 0.673378266 |
| C9ORF98   | 0.013003396  | 6.101621253 | 0.673411262 |
| TTC9C     | 0.011753588  | 6.677051193 | 0.673431163 |
| ADAT1     | -0.015839349 | 7.250589098 | 0.673568464 |
| SNX22     | 0.01420571   | 6.270367472 | 0.673572299 |
| LOC646246 | 0.010495211  | 5.89035265  | 0.673763227 |
| LOC644663 | 0.010313895  | 6.096373196 | 0.673810501 |
| LOC400019 | 0.012338787  | 6.164475108 | 0.673844355 |
| LOC730841 | -0.011997845 | 6.498365432 | 0.673865607 |
| LOC150297 | -0.010851111 | 6.032442563 | 0.67390206  |
| IL12B     | -0.01191101  | 5.983664513 | 0.674011414 |
| TMEM200B  | 0.012849177  | 5.906316303 | 0.674023118 |
| LOC653203 | -0.005969844 | 6.03896653  | 0.674042066 |
| FAM62A    | -0.025096865 | 8.668456645 | 0.674139087 |
| LOC158257 | -0.009885544 | 6.200882372 | 0.674305591 |
| DIAPH3    | -0.005780302 | 6.128889441 | 0.674351291 |
| HIST1H4F  | 0.010121927  | 6.039645247 | 0.674387278 |
| C2ORF43   | -0.012611298 | 6.696432747 | 0.674442003 |
| FNDC8     | -0.011527385 | 6.082412788 | 0.67446816  |
| MMP11     | -0.022226197 | 6.864069262 | 0.674579074 |
| NUS1      | 0.015026327  | 6.792678838 | 0.674720826 |
| E2F1      | 0.018146951  | 5.984131015 | 0.674844614 |
| VRK2      | 0.017007474  | 7.094302442 | 0.674848156 |
| LOC643133 | -0.011502141 | 5.959038825 | 0.674868631 |
| SMEK2     | 0.0202048    | 7.983758559 | 0.674904742 |
| CD1A      | -0.01128447  | 6.027817192 | 0.675008781 |
| TRIM7     | -0.00925875  | 6.436034152 | 0.67501519  |
| LOC650062 | 0.010876166  | 6.00571609  | 0.675057464 |
| DFFA      | 0.011400123  | 7.593782497 | 0.675150506 |
| DNAH12L   | 0.009108559  | 6.006623976 | 0.67538059  |
| AJAP1     | 0.008203458  | 6.190473388 | 0.675396348 |
| FAM148A   | 0.009390004  | 5.87664121  | 0.675420907 |
| AQP5      | -0.010631352 | 5.976103045 | 0.675622537 |
| BMP10     | -0.013303897 | 5.958585655 | 0.675703073 |
| LOC732206 | -0.010399299 | 6.015892223 | 0.675754657 |
| OR52N2    | 0.013827163  | 6.597845095 | 0.676048953 |
| ACMSD     | 0.016310166  | 6.983624579 | 0.676105341 |
| C6ORF156  | -0.010259304 | 5.925319334 | 0.676159579 |
| LRRC19    | 0.012075546  | 6.157654257 | 0.676213378 |
| LOC474170 | -0.010197643 | 6.329103205 | 0.676265381 |
| LOC654191 | 0.021741245  | 7.223306543 | 0.676325067 |
| LOC653658 | -0.031856039 | 11.6994797  | 0.676406731 |
| FAM136A   | 0.017530853  | 8.839390985 | 0.676565856 |
| C13ORF16  | -0.012091712 | 6.0756652   | 0.676631749 |
| OR10V1    | 0.012111623  | 6.010991402 | 0.676764585 |
| LRPPRC    | 0.018747839  | 8.851774286 | 0.676877089 |
| PEF1      | 0.018853248  | 8.421016685 | 0.676998464 |
| LOC645963 | 0.011380207  | 6.136313337 | 0.677013894 |

## DEG.infomation

|           |              |             |             |
|-----------|--------------|-------------|-------------|
| CAND1     | 0.019966297  | 6.596816105 | 0.677106439 |
| FLJ46836  | 0.021854993  | 5.966586657 | 0.67717787  |
| NARG2     | 0.008804915  | 6.599861668 | 0.677180028 |
| LOC643284 | -0.019020726 | 13.54419521 | 0.677206757 |
| LOC643432 | -0.009435388 | 6.148004206 | 0.677245636 |
| DHRS2     | 0.00881486   | 6.118346965 | 0.677307334 |
| HOXD4     | -0.010893173 | 6.186402025 | 0.677568431 |
| TUSC2     | 0.014792342  | 7.292401983 | 0.677588854 |
| LOC643983 | 0.010709995  | 6.030844725 | 0.677625119 |
| MIER3     | 0.012189779  | 6.198010609 | 0.677690213 |
| LOC344065 | 0.011662287  | 6.236930611 | 0.677754331 |
| C8ORF74   | 0.007879647  | 6.05821683  | 0.677817469 |
| PTPN20B   | -0.006571127 | 6.068360147 | 0.67784239  |
| C20ORF62  | 0.009989844  | 6.295569037 | 0.677865722 |
| CIC       | 0.015337427  | 7.260510859 | 0.67790347  |
| INSIG1    | 0.017867933  | 7.525090514 | 0.677926212 |
| LOC731042 | 0.009959549  | 6.004073556 | 0.67794113  |
| C16ORF42  | 0.017266903  | 7.818276255 | 0.67802985  |
| DBX1      | 0.013033416  | 6.049118475 | 0.678071945 |
| LOC644433 | -0.010796709 | 6.040111461 | 0.67809442  |
| LOC441193 | 0.014929589  | 6.117345696 | 0.678171162 |
| LOC643089 | -0.010334566 | 6.055914512 | 0.678257069 |
| EGLN3     | 0.03414098   | 7.926689628 | 0.678289572 |
| SIX2      | -0.0116784   | 5.995799885 | 0.678311238 |
| LOC652874 | 0.010587925  | 5.906489435 | 0.678344728 |
| LOC642365 | 0.009593797  | 6.121572654 | 0.67839349  |
| FLJ14186  | 0.010516708  | 6.098308909 | 0.67839947  |
| SLC35F4   | -0.011165514 | 6.156670802 | 0.678478817 |
| UGT2B28   | -0.00936584  | 6.019495961 | 0.678536797 |
| C6ORF218  | 0.010672291  | 6.133882676 | 0.678605388 |
| LOC644372 | 0.012358062  | 5.960268482 | 0.678637571 |
| RPL10     | -0.007720466 | 6.06924962  | 0.678664292 |
| MLL2      | 0.018956683  | 6.120709972 | 0.678665157 |
| LOC644789 | -0.011569018 | 6.301601733 | 0.678668241 |
| MRPL37    | -0.01413472  | 11.14187412 | 0.678821655 |
| LRRC43    | -0.011423232 | 6.158754595 | 0.678915216 |
| SBSN      | -0.01013169  | 6.010875997 | 0.679047136 |
| FOXH1     | 0.013564504  | 6.780715009 | 0.679083186 |
| INS-IGF2  | 0.00784681   | 5.972693463 | 0.679110536 |
| USP32     | -0.010245521 | 6.123364057 | 0.679136331 |
| LOC649596 | 0.011763643  | 6.439349124 | 0.679142898 |
| XPO1      | 0.023998496  | 9.558545408 | 0.67926491  |
| CCDC129   | 0.015634901  | 6.08273061  | 0.67935017  |
| C11ORF40  | 0.012154109  | 5.945684572 | 0.679410152 |
| LETM2     | -0.010237173 | 6.095763907 | 0.679440222 |
| C14ORF104 | -0.020437161 | 7.06317313  | 0.679500464 |
| FLJ41733  | -0.012221699 | 6.071960238 | 0.679509836 |
| LOC644046 | 0.01048265   | 6.013046504 | 0.679534143 |
| OR52I2    | 0.010577825  | 5.899254734 | 0.679858786 |
| PTCHD1    | 0.010694813  | 6.037068211 | 0.679917621 |
| LOC651821 | -0.010018339 | 6.031142138 | 0.679957239 |

## DEG.infomation

|           |              |             |             |
|-----------|--------------|-------------|-------------|
| RGL3      | 0.015719472  | 5.996125821 | 0.680051364 |
| LOC619208 | 0.018087056  | 6.42607927  | 0.680144238 |
| LOC649757 | 0.010513691  | 5.939249249 | 0.680289866 |
| RNGTT     | -0.020294326 | 8.677666828 | 0.680303612 |
| AFP       | 0.010610666  | 6.12493856  | 0.680420115 |
| RNU2-1    | 0.011136606  | 6.034455211 | 0.68045142  |
| LOC644508 | -0.011710764 | 5.91479943  | 0.680520385 |
| LOC652161 | 0.008992615  | 6.219980369 | 0.68055216  |
| LOC646870 | 0.009825377  | 6.141922947 | 0.680643312 |
| DUSP9     | 0.015225625  | 5.923815024 | 0.680824237 |
| PRG-3     | -0.00656531  | 6.183977753 | 0.680944656 |
| LOC644958 | -0.009585413 | 6.111717442 | 0.680982751 |
| BACH1     | 0.006997021  | 6.12527469  | 0.681034378 |
| LOC645040 | -0.009429594 | 6.04723656  | 0.681072477 |
| LOC646236 | -0.009962667 | 6.029608366 | 0.681148118 |
| LOC150051 | 0.009369522  | 6.228412122 | 0.681247272 |
| ITSN2     | -0.011776716 | 6.148406073 | 0.681304248 |
| TTY11     | -0.008747977 | 6.161186969 | 0.681335712 |
| CNR1      | 0.01204169   | 6.086755989 | 0.681839359 |
| IPMK      | 0.015961031  | 6.099801667 | 0.68193576  |
| LOC730412 | 0.013998586  | 5.93494814  | 0.682037187 |
| CCR8      | -0.011966638 | 5.953918232 | 0.682039236 |
| LOC647349 | -0.027524712 | 8.649677339 | 0.682114299 |
| FAM59B    | -0.010631902 | 6.142530298 | 0.682287932 |
| LOC645445 | 0.010843178  | 6.162416754 | 0.682335549 |
| DGKZ      | -0.007035358 | 5.991203085 | 0.682347005 |
| LOC646560 | 0.009684326  | 6.12626845  | 0.682437383 |
| LOC641982 | 0.009800961  | 5.998400023 | 0.682464851 |
| CAMK2N2   | 0.010820721  | 6.039902992 | 0.682489802 |
| LOC644377 | -0.009816489 | 5.983902791 | 0.682520169 |
| UTRN      | 0.013901496  | 6.986848932 | 0.682526426 |
| ADCK1     | 0.016872018  | 7.343533569 | 0.682660294 |
| PPIC      | -0.021818446 | 9.587975621 | 0.682725615 |
| AADACL2   | 0.009279675  | 6.063072745 | 0.682840015 |
| LOC391427 | 0.009362974  | 6.073465719 | 0.682888315 |
| LOC644714 | -0.005756964 | 6.064969567 | 0.682979467 |
| TRIM75    | -0.009238389 | 6.082761468 | 0.683178074 |
| DTWD1     | -0.012771587 | 6.688459785 | 0.683282757 |
| SNORD38B  | -0.009607851 | 6.062142661 | 0.683333536 |
| ZNF862    | 0.010667516  | 6.067749749 | 0.683404634 |
| FLJ21687  | 0.016702155  | 6.121791072 | 0.683479457 |
| LOC644361 | -0.012023932 | 6.003743462 | 0.683509852 |
| TRIM60    | -0.007975903 | 6.170710841 | 0.683562021 |
| LOC390811 | 0.00970617   | 6.153562674 | 0.683611529 |
| C4ORF7    | -0.010595796 | 5.991581374 | 0.683690915 |
| TAS2R16   | -0.011013509 | 6.08086266  | 0.683693487 |
| LOC643039 | -0.010654533 | 6.017460052 | 0.683750605 |
| LOC646906 | 0.017343796  | 6.000347563 | 0.683766509 |
| CSRP2     | -0.026142543 | 7.907527232 | 0.68377742  |
| LOXL1     | 0.018136621  | 6.581793264 | 0.683779779 |
| LOC642853 | -0.009253349 | 6.162611361 | 0.68380919  |

## DEG.infomation

|           |              |             |             |
|-----------|--------------|-------------|-------------|
| BRF1      | 0.006828174  | 6.237530035 | 0.683828984 |
| LOC647306 | 0.009854098  | 6.173236682 | 0.683916017 |
| IFNA2     | 0.009906817  | 5.979734052 | 0.684049474 |
| STUB1     | -0.020888082 | 9.484886234 | 0.684092217 |
| LOC196120 | -0.009147339 | 6.00275189  | 0.684117402 |
| C10ORF128 | -0.016028384 | 6.72435051  | 0.684164268 |
| OR2AE1    | 0.010330711  | 6.021919751 | 0.684179968 |
| GNG8      | 0.013886162  | 6.192374476 | 0.684341254 |
| LOC644151 | -0.011608398 | 6.060598451 | 0.684421597 |
| CYP2A6    | -0.009381404 | 5.957282676 | 0.684422176 |
| C6ORF10   | 0.009796424  | 6.104854025 | 0.684479819 |
| HBS1L     | -0.007026524 | 6.165257692 | 0.68451943  |
| MCM6      | 0.021962333  | 8.4200309   | 0.684534853 |
| LOC651286 | 0.008453487  | 6.062156356 | 0.684560354 |
| C2ORF19   | -0.011633002 | 5.965502725 | 0.684565547 |
| LOC402677 | 0.01264688   | 6.238583396 | 0.684582636 |
| YSK4      | 0.006588148  | 6.002037109 | 0.684616405 |
| LOC441340 | -0.010366917 | 6.061047012 | 0.684704036 |
| GBAP      | 0.012348807  | 6.391634424 | 0.684785599 |
| DTYMK     | 0.010075371  | 5.929763969 | 0.684937215 |
| KIAA0913  | 0.016741317  | 8.78905234  | 0.68497648  |
| LOC644865 | -0.010832016 | 6.263746504 | 0.68512685  |
| PRR4      | -0.013619444 | 6.490775468 | 0.685199155 |
| LOC654115 | -0.011120638 | 6.289756338 | 0.685208709 |
| LOC642851 | 0.010602157  | 5.927529246 | 0.685217633 |
| OR4C3     | -0.007865484 | 6.119799922 | 0.685224792 |
| FOXB2     | -0.014987446 | 6.083302798 | 0.685233515 |
| LOC646653 | 0.009736054  | 6.214624187 | 0.685273081 |
| HIF3A     | -0.006808575 | 6.158049168 | 0.685378967 |
| OR6A2     | 0.011791445  | 6.050171784 | 0.685403635 |
| NSUN5     | 0.011531834  | 7.103219145 | 0.685428129 |
| LOC400455 | 0.019715662  | 10.28930911 | 0.68545054  |
| SCAMP1    | 0.01557926   | 9.05610775  | 0.685643352 |
| CNOT8     | 0.015590473  | 7.667912654 | 0.685705554 |
| WFDC12    | 0.008745264  | 5.963021886 | 0.685862441 |
| RBMY1J    | 0.004730182  | 5.997722627 | 0.685890455 |
| C10ORF95  | -0.009646857 | 6.111540395 | 0.685892167 |
| KRT25     | -0.010575829 | 6.00256204  | 0.68593789  |
| LOC652217 | 0.008440528  | 6.059878671 | 0.68609428  |
| LOC645307 | -0.009987231 | 5.998446184 | 0.686170103 |
| CHRNA3    | 0.01535927   | 6.027003575 | 0.686287147 |
| TXNDC3    | -0.010078971 | 6.004767756 | 0.686316072 |
| LOC643373 | 0.010364583  | 6.175625256 | 0.686436248 |
| KRT33A    | 0.007425329  | 6.05761223  | 0.686463321 |
| GSDMA     | 0.010062229  | 6.082428773 | 0.686623319 |
| TMPRSS9   | -0.010918759 | 6.011517654 | 0.686657753 |
| EMR3      | -0.007937964 | 5.987108152 | 0.686760746 |
| LOC644183 | 0.008488079  | 5.957187344 | 0.686814463 |
| OPCML     | 0.007362746  | 6.369139589 | 0.686858467 |
| LOC729012 | -0.008884105 | 5.9566391   | 0.686912628 |
| ZNF700    | 0.010548312  | 7.282581066 | 0.68694293  |

## DEG.infomation

|           |              |             |             |
|-----------|--------------|-------------|-------------|
| BCKDK     | -0.014814917 | 10.9810743  | 0.686987228 |
| OR52E8    | 0.010696982  | 5.899640495 | 0.687011216 |
| LOC648502 | 0.010242956  | 6.0127256   | 0.687051331 |
| LOC653166 | -0.008988189 | 6.098945784 | 0.687108876 |
| CDKL1     | 0.009499004  | 6.241905826 | 0.687115627 |
| MAP1LC3C  | -0.012545717 | 6.350580323 | 0.687116043 |
| LOC441454 | -0.011489224 | 6.106323794 | 0.687208347 |
| LOC644166 | 0.008919505  | 6.046576408 | 0.687232057 |
| LOC642675 | 0.010364219  | 5.932856821 | 0.687247002 |
| TCTE1     | -0.009362889 | 5.941185996 | 0.687275053 |
| PSMB2     | 0.016993143  | 9.828074694 | 0.687297752 |
| AGBL1     | -0.006973013 | 6.02195429  | 0.687366072 |
| ZC3H11A   | 0.012241394  | 6.012180468 | 0.687405342 |
| ZNF274    | 0.012337321  | 7.738228078 | 0.687426867 |
| GUCY2E    | 0.011059433  | 6.123828407 | 0.687619769 |
| UGT1A6    | -0.006143505 | 6.005193996 | 0.68774373  |
| TIAL1     | 0.012111644  | 7.694478815 | 0.68783454  |
| KRT2      | -0.009604915 | 5.959707835 | 0.688118618 |
| TAF5      | -0.010739196 | 6.73025756  | 0.688144603 |
| LOC728904 | -0.009558452 | 6.009847111 | 0.688539433 |
| LOC441296 | -0.010415533 | 5.976450418 | 0.688630564 |
| LOC651648 | 0.011003258  | 6.187899078 | 0.688661677 |
| GCGR      | 0.011102843  | 5.975313529 | 0.688908883 |
| LOC642449 | -0.012524522 | 6.129065543 | 0.689000672 |
| CETN1     | -0.007907279 | 6.169204045 | 0.689003171 |
| TAF10     | 0.018545903  | 9.717081348 | 0.689139686 |
| LOC652563 | 0.009513633  | 6.130239925 | 0.689178331 |
| SLBP      | -0.019841575 | 7.254534272 | 0.689237649 |
| WDR17     | 0.006160054  | 6.083225816 | 0.689247994 |
| ANKRD20A3 | 0.009313316  | 5.990488869 | 0.689313121 |
| PLA2G6    | 0.006765511  | 6.232114415 | 0.689338842 |
| SPATA12   | -0.010478582 | 6.049197614 | 0.689403016 |
| LOC93556  | -0.009285048 | 5.944341164 | 0.689457042 |
| LOC645649 | 0.009852558  | 6.141663413 | 0.689473402 |
| LOC649999 | 0.011097431  | 6.227568265 | 0.68948652  |
| ZNF526    | -0.023274637 | 6.616179747 | 0.689525857 |
| INGX      | 0.010220848  | 6.157255951 | 0.68955034  |
| LOC643703 | 0.009692539  | 6.086860799 | 0.689583315 |
| LOC652492 | 0.009376669  | 6.285821892 | 0.689660809 |
| LOC649350 | -0.009750412 | 6.054770933 | 0.689685313 |
| PP8961    | -0.007224735 | 6.034939366 | 0.689767885 |
| RHD       | -0.009290868 | 5.976438863 | 0.689803483 |
| LOC728951 | 0.007949624  | 6.122834179 | 0.68985767  |
| FOXN4     | 0.010295286  | 6.014937303 | 0.690024001 |
| FLJ27365  | -0.016271073 | 6.254368689 | 0.690121986 |
| RNASE9    | -0.009530868 | 5.865590041 | 0.690209935 |
| SYT10     | 0.010409905  | 5.887327571 | 0.690215286 |
| LOC147670 | -0.009208191 | 6.17811266  | 0.690257732 |
| SYT8      | 0.011418046  | 6.069213408 | 0.690322801 |
| LOC730413 | 0.009656588  | 6.164738379 | 0.690415523 |
| CYP4A22   | 0.006803364  | 5.985853338 | 0.690446668 |

## DEG.infomation

|            |              |             |             |
|------------|--------------|-------------|-------------|
| PPM1D      | 0.018008099  | 7.091224131 | 0.690465143 |
| CBLN3      | -0.013904117 | 6.679212771 | 0.690587405 |
| CYORF15B   | 0.017171144  | 6.548674064 | 0.690619735 |
| KLF17      | -0.013520876 | 6.010185064 | 0.690816463 |
| LOC727775  | -0.011423788 | 6.072862538 | 0.690897292 |
| LOC147650  | -0.009288064 | 6.236513406 | 0.691022403 |
| C14ORF39   | -0.006675373 | 6.12838191  | 0.691041217 |
| C20ORF79   | -0.009182189 | 6.101709187 | 0.69130431  |
| HECA       | 0.032314684  | 8.32778934  | 0.691333099 |
| FLJ46284   | 0.010232234  | 6.078804439 | 0.691415967 |
| UBE2CBP    | -0.007876028 | 6.314104494 | 0.691528542 |
| LOC647357  | 0.008249463  | 6.198498748 | 0.691675582 |
| LOC642434  | -0.009858572 | 6.11708918  | 0.691721798 |
| MLXIP      | -0.009783352 | 6.116047363 | 0.691736447 |
| FCRL6      | -0.011801627 | 5.927091885 | 0.691775125 |
| LRIT2      | -0.009853694 | 6.028783848 | 0.691843614 |
| C11ORF77   | 0.011458953  | 6.39907919  | 0.691876242 |
| SLPI       | -0.009730277 | 6.024912402 | 0.691909306 |
| CCDC9      | 0.010209385  | 6.170884034 | 0.692032414 |
| LOC649944  | 0.007238508  | 5.936825236 | 0.692147277 |
| KRT78      | 0.011146265  | 6.04372616  | 0.692240038 |
| C14ORF166B | 0.008834488  | 6.14357522  | 0.692287245 |
| SLC33A1    | 0.019109026  | 6.811625394 | 0.69229508  |
| BAG1       | 0.010639479  | 6.289842824 | 0.69233456  |
| C1ORF182   | -0.010782044 | 6.159502551 | 0.692373842 |
| MAGEC1     | 0.00534421   | 6.042855107 | 0.692531886 |
| MSX2       | -0.012155606 | 6.188001038 | 0.692592062 |
| LOC650407  | 0.009612153  | 6.002468289 | 0.692628079 |
| IRF4       | 0.014290236  | 6.224231533 | 0.692689868 |
| C12ORF31   | 0.027785905  | 8.473637265 | 0.692711609 |
| LOC91948   | 0.011222391  | 6.126673539 | 0.692724204 |
| SLC39A6    | -0.013987488 | 7.073880889 | 0.692774031 |
| C19ORF34   | -0.012374616 | 5.938168021 | 0.69281215  |
| LOC652777  | 0.010938638  | 6.163228976 | 0.692815159 |
| SNHG5      | 0.046473469  | 10.26556084 | 0.693009802 |
| MIPOL1     | -0.009347909 | 6.195994912 | 0.693106536 |
| EME2       | 0.011230248  | 6.134998077 | 0.693106956 |
| LOC643047  | 0.010538655  | 6.095640948 | 0.693197421 |
| HES7       | -0.011708039 | 5.8033181   | 0.693272352 |
| CNTD1      | -0.010513408 | 6.065492316 | 0.693296964 |
| LDOC1L     | 0.019362888  | 8.29572529  | 0.693337257 |
| LOC283398  | -0.010773655 | 6.121364169 | 0.693378097 |
| GTSE1      | -0.011568621 | 6.167531578 | 0.693392529 |
| SDC1       | 0.008081199  | 6.19739275  | 0.693485029 |
| LOC646429  | 0.010258338  | 5.96071926  | 0.693500408 |
| MUC5AC     | -0.009537446 | 6.218315277 | 0.693628855 |
| AMELX      | 0.009028521  | 5.988596607 | 0.693693951 |
| LOC650594  | -0.009122095 | 6.099654936 | 0.693734913 |
| KLHL9      | -0.019945087 | 8.633231098 | 0.693790346 |
| RPS26      | -0.027116691 | 10.36530461 | 0.693807806 |
| OR8U9      | -0.006852636 | 5.963300975 | 0.693995595 |

## DEG.infomation

|           |              |             |             |
|-----------|--------------|-------------|-------------|
| LOC642420 | -0.009388023 | 6.078751841 | 0.694010003 |
| LOC642762 | 0.009395561  | 6.112529462 | 0.694065612 |
| LCN8      | -0.009780523 | 5.923640589 | 0.694068578 |
| LOC401268 | 0.015147015  | 6.0598971   | 0.694174582 |
| C17ORF66  | 0.009573186  | 6.016203396 | 0.694187142 |
| VNN1      | -0.01268533  | 6.233654646 | 0.694376645 |
| LOC256483 | -0.009294944 | 6.057775399 | 0.694437056 |
| MAG       | -0.007159365 | 6.160167601 | 0.694440288 |
| LOC339529 | -0.00837711  | 6.024501758 | 0.694553751 |
| RGS2      | 0.011032089  | 6.082234804 | 0.694622806 |
| APC2      | 0.009383368  | 6.099675573 | 0.694650305 |
| LOC652562 | -0.010669499 | 6.020920203 | 0.694828505 |
| HDLBP     | 0.006610287  | 6.401258868 | 0.694971919 |
| FAM71C    | -0.00881297  | 6.051790883 | 0.69499248  |
| SETD1A    | 0.016326196  | 7.741041613 | 0.695120003 |
| EFHC2     | -0.040189082 | 7.511491482 | 0.695135088 |
| FAM108A1  | -0.006950646 | 6.067338889 | 0.695240247 |
| OPN1LW    | -0.010810203 | 5.989391908 | 0.695346132 |
| ADAM9     | 0.014881143  | 7.176840674 | 0.695363069 |
| LOC642743 | 0.012469439  | 6.08102862  | 0.695452479 |
| GPC3      | -0.01641016  | 6.432119158 | 0.69552876  |
| KRTAP2-2  | 0.007475878  | 5.969762077 | 0.695543536 |
| LOC650852 | 0.00982834   | 6.17113482  | 0.695583693 |
| IL17C     | -0.009832556 | 6.26189477  | 0.69567622  |
| WDR82     | 0.01711145   | 9.351891097 | 0.695697902 |
| LOC442606 | -0.010005158 | 6.144797755 | 0.695720016 |
| NCR2      | -0.010805788 | 6.038450436 | 0.695733143 |
| PHTF2     | 0.017933444  | 6.295102303 | 0.695970917 |
| PRDM14    | -0.007207947 | 6.068693857 | 0.69600135  |
| MMAA      | -0.013107935 | 6.257647688 | 0.696208726 |
| LOC648733 | -0.009362305 | 5.996749398 | 0.696260476 |
| GALNT2    | -0.01343817  | 6.401227665 | 0.696492801 |
| KCTD9     | -0.018054662 | 8.39778233  | 0.69650656  |
| LOC649324 | 0.009820321  | 6.01413841  | 0.696514157 |
| LOC644257 | 0.010708843  | 5.963787096 | 0.696541564 |
| FAM119A   | -0.023893644 | 10.47564463 | 0.696553962 |
| MYO3A     | -0.011793022 | 5.950420301 | 0.696566951 |
| LOC642515 | -0.011547251 | 5.928034066 | 0.696607161 |
| LOC644733 | 0.011588795  | 6.274283011 | 0.696611159 |
| POLN      | -0.010099794 | 6.090917611 | 0.696689063 |
| LOC645033 | 0.008951796  | 6.030564467 | 0.696800314 |
| MOGAT1    | -0.015702601 | 6.518668566 | 0.696820701 |
| GPR125    | -0.008857716 | 6.52999799  | 0.696939997 |
| LOC643320 | 0.01056007   | 6.10502798  | 0.696996635 |
| KCNG4     | 0.006777557  | 5.934629049 | 0.697011208 |
| GYPE      | -0.005116204 | 6.074458601 | 0.697025593 |
| LOC646649 | 0.008410347  | 6.002864355 | 0.697036557 |
| WBP11     | 0.01448244   | 8.968359793 | 0.69706556  |
| LOC651614 | -0.01053815  | 6.033970025 | 0.697115881 |
| UBE2B     | 0.012317356  | 6.664318235 | 0.697135437 |
| LOC284274 | -0.007543661 | 6.002439655 | 0.69722414  |

## DEG.infomation

|           |              |             |             |
|-----------|--------------|-------------|-------------|
| LCE3C     | 0.008535903  | 5.969903593 | 0.697318992 |
| BAGE5     | -0.015178186 | 6.410753128 | 0.697402657 |
| LOC642914 | 0.009931794  | 6.137999922 | 0.6974071   |
| TGM1      | -0.010448085 | 6.122693518 | 0.697412653 |
| LOC648476 | -0.007528535 | 6.181316578 | 0.697423188 |
| FLJ13224  | -0.007233611 | 6.122392606 | 0.697586833 |
| OR56A1    | 0.009046467  | 6.063003674 | 0.697593012 |
| LOC441294 | -0.006799425 | 6.113060789 | 0.697691389 |
| GAGE1     | -0.004782788 | 6.08884967  | 0.697804908 |
| OVOS      | -0.010199507 | 6.133783513 | 0.697813347 |
| LOC653241 | -0.014210238 | 5.999835049 | 0.697930122 |
| TMPRSS11F | 0.010024747  | 6.158331659 | 0.697943352 |
| FLJ36166  | 0.009689464  | 5.936340391 | 0.698050435 |
| PGCP      | 0.018413567  | 8.539367327 | 0.698074087 |
| PAK3      | -0.010961629 | 6.12764053  | 0.698163344 |
| CLCN4     | 0.014167456  | 6.32372445  | 0.698221533 |
| RFPL1S    | 0.007626766  | 6.149331621 | 0.698283962 |
| ARMC2     | 0.007203047  | 6.121722906 | 0.698328036 |
| LOC651711 | 0.010853808  | 5.970636015 | 0.698515662 |
| LOC652062 | 0.010282033  | 6.176827683 | 0.698810605 |
| HPSE2     | 0.009105015  | 6.057053219 | 0.698846919 |
| ZNF280C   | 0.007113049  | 6.494786883 | 0.698943408 |
| LOC651280 | -0.008492625 | 6.0891867   | 0.699007068 |
| LOC646023 | 0.010225678  | 6.119799199 | 0.699095447 |
| MOBK1B    | 0.017982367  | 6.173939197 | 0.699207898 |
| TAS2R39   | 0.009342924  | 6.150321448 | 0.699209601 |
| ACTL8     | -0.012566578 | 6.084405056 | 0.699284022 |
| GSG1      | -0.005607143 | 6.127743226 | 0.699393743 |
| GAGE12I   | 0.020656176  | 6.095218241 | 0.699399069 |
| BMX       | -0.006522646 | 6.160628504 | 0.699444306 |
| LOC652768 | 0.009827686  | 6.126921321 | 0.699476353 |
| OR5I1     | -0.009943204 | 6.0187715   | 0.699606306 |
| TBX6      | -0.006885097 | 6.136662627 | 0.699770342 |
| LOC654189 | 0.016028103  | 6.932856683 | 0.699836568 |
| CPA6      | 0.010045458  | 5.816817163 | 0.699919311 |
| LOC730099 | -0.009545261 | 5.907023252 | 0.700094514 |
| LOC647481 | -0.010238384 | 6.060494658 | 0.700267586 |
| LOC650612 | -0.009651518 | 5.952878133 | 0.700278222 |
| FXVD7     | -0.010691749 | 6.129789798 | 0.700373507 |
| PRPF40A   | -0.014346548 | 7.054322357 | 0.700412514 |
| MAP3K7IP2 | -0.013621219 | 6.560636972 | 0.70042867  |
| PRB2      | -0.007214143 | 6.107894496 | 0.700440535 |
| R3HCC1    | -0.013851177 | 9.327696758 | 0.700475073 |
| SMTN      | -0.024953295 | 8.741840011 | 0.700482048 |
| PHF16     | -0.01366724  | 7.454856812 | 0.700534386 |
| IMPG1     | 0.00697963   | 5.985615962 | 0.700690716 |
| LOC401152 | -0.017822759 | 8.586481745 | 0.700810386 |
| INSL3     | -0.009664751 | 5.920126527 | 0.700857095 |
| HSPB2     | 0.024155014  | 10.38549751 | 0.701021247 |
| G0S2      | 0.048949944  | 7.966843218 | 0.701031803 |
| DUSP10    | 0.007632793  | 6.232210703 | 0.701103315 |



## DEG.infomation

|           |              |             |             |
|-----------|--------------|-------------|-------------|
| LOC642761 | 0.008792622  | 6.012578706 | 0.701122938 |
| AADAC     | 0.01018957   | 6.073549532 | 0.70116537  |
| MOV10L1   | -0.010109491 | 6.090872827 | 0.701228688 |
| LOC347119 | -0.009864575 | 5.903663642 | 0.701305725 |
| OR10Q1    | -0.009112111 | 5.982223621 | 0.701312081 |
| S100A1L   | -0.006711859 | 6.128014423 | 0.701320094 |
| FAM55B    | 0.010298841  | 5.986463032 | 0.701353016 |
| LOC645104 | 0.00778071   | 6.028379066 | 0.701387463 |
| LOC654340 | 0.009348538  | 6.049737705 | 0.70144215  |
| CALB1     | -0.010196389 | 6.013495857 | 0.701508061 |
| INSL5     | -0.012010292 | 6.092659473 | 0.701560636 |
| LOC389442 | 0.00885279   | 6.078591391 | 0.70156277  |
| LOC340069 | 0.009933542  | 6.000905859 | 0.701637694 |
| LOC642008 | -0.009623216 | 6.050664561 | 0.701654261 |
| FAM154B   | -0.011912315 | 5.99182163  | 0.701695552 |
| FOLR1     | -0.005411674 | 6.135538738 | 0.701750486 |
| LOC648222 | 0.009423606  | 5.986750609 | 0.701754611 |
| RAD23B    | 0.021343166  | 9.047892478 | 0.701883812 |
| LOC644650 | 0.017192465  | 6.037725692 | 0.701895154 |
| TRAF3IP3  | 0.009340394  | 6.030231097 | 0.702000594 |
| OR3A2     | 0.009871738  | 6.075912458 | 0.702049004 |
| C1ORF135  | -0.009509996 | 5.976594903 | 0.702242432 |
| SUV420H1  | -0.009363406 | 6.85523542  | 0.702399152 |
| C14ORF181 | -0.014022511 | 6.214232429 | 0.702510302 |
| C10ORF88  | 0.015882784  | 6.956069563 | 0.702530494 |
| LOC652305 | -0.011550774 | 5.9896263   | 0.702597272 |
| SOX21     | -0.011411369 | 6.097114271 | 0.70268766  |
| RSPO4     | 0.007217236  | 6.040033981 | 0.70271299  |
| LOC648801 | -0.009032505 | 6.00340433  | 0.702756216 |
| LOC643938 | -0.009032475 | 6.084012659 | 0.70275744  |
| RASGRF1   | 0.008219653  | 6.093716883 | 0.702786166 |
| ANXA8     | -0.007716707 | 6.118091902 | 0.702833835 |
| FAAH2     | 0.01273848   | 6.149034788 | 0.702859427 |
| LOC642607 | 0.00936489   | 6.112770517 | 0.702924412 |
| HRH1      | 0.011846521  | 6.426015791 | 0.703064096 |
| PNPO      | -0.015816069 | 9.805887235 | 0.70308526  |
| SLC22A1   | -0.008479685 | 6.213678575 | 0.703381169 |
| PRUNE2    | 0.007380339  | 6.114602337 | 0.703562973 |
| ZNF229    | 0.011134355  | 6.015903828 | 0.703607854 |
| MYO15B    | -0.00868425  | 6.069767196 | 0.703695022 |
| RAET1L    | -0.008621731 | 6.05349193  | 0.703707266 |
| POU4F3    | -0.009896254 | 5.986416343 | 0.703770144 |
| STAC3     | -0.012578067 | 6.087271407 | 0.703775772 |
| LOC649198 | -0.007046651 | 5.99777987  | 0.703790767 |
| LOC389422 | -0.009327794 | 6.00518663  | 0.70382522  |
| RPA2      | -0.020772387 | 9.95943734  | 0.70383562  |
| UPRT      | -0.017986946 | 8.17319785  | 0.703861718 |
| ADAM7     | -0.009972123 | 6.260152608 | 0.703865995 |
| TAS2R44   | 0.009146169  | 5.967144827 | 0.703867076 |
| LOC643017 | 0.00972036   | 6.08832404  | 0.703876655 |
| INHBB     | -0.035635329 | 6.800565373 | 0.704044679 |

## DEG.infomation

|               |              |             |             |
|---------------|--------------|-------------|-------------|
| LOC645391     | 0.009494306  | 5.931246275 | 0.704069561 |
| LOC168474     | 0.010052706  | 6.303023896 | 0.704113226 |
| LOC440910     | -0.006470896 | 6.073005936 | 0.70412439  |
| OR6C6         | 0.009782126  | 6.014544083 | 0.704133915 |
| LOC647634     | -0.009510101 | 6.099031046 | 0.704181954 |
| LOC730952     | 0.015825926  | 5.96877798  | 0.70420896  |
| DMP1          | 0.007639019  | 5.996714986 | 0.704345934 |
| CYP2W1        | 0.013019227  | 6.039702908 | 0.704513945 |
| LOC389267     | 0.009318105  | 6.081166024 | 0.70480908  |
| GSTT1         | -0.113097079 | 9.268842452 | 0.704823243 |
| CDC6          | 0.009805153  | 6.054111657 | 0.705047266 |
| TCF7L1        | -0.012090103 | 6.512186116 | 0.705125023 |
| LOC654088     | -0.007384718 | 6.07238039  | 0.705155861 |
| NDRG3         | -0.018708879 | 8.118856088 | 0.705296304 |
| FLJ12078      | -0.014634651 | 6.572269685 | 0.705379618 |
| LOC132707     | -0.008153012 | 6.057000609 | 0.705490127 |
| SPG21         | 0.014653453  | 6.969387369 | 0.705557855 |
| OR1L4         | -0.006964502 | 6.114044469 | 0.705562093 |
| PCDHA9        | 0.005975469  | 6.101979003 | 0.705589976 |
| LOC652551     | 0.009954637  | 5.954470447 | 0.705591259 |
| FASTK         | 0.020562374  | 8.648694999 | 0.70563359  |
| RUFY3         | -0.012019044 | 7.028953691 | 0.705762089 |
| ASTL          | 0.009755366  | 6.331532472 | 0.70584131  |
| GDF1          | 0.00596585   | 6.044163281 | 0.705895755 |
| TBC1D23       | 0.02721815   | 7.036018878 | 0.705931753 |
| CXORF30       | -0.010638834 | 5.979651792 | 0.706062644 |
| PGLYRP4       | -0.009492074 | 6.441767311 | 0.706110384 |
| LOC728137     | -0.015143738 | 5.890964302 | 0.706112676 |
| MUCL1         | -0.009729288 | 6.155089609 | 0.706114506 |
| LOC644756     | 0.009885611  | 6.245957727 | 0.706140157 |
| ENTPD1        | 0.013690474  | 6.987033677 | 0.706145421 |
| DUOX1         | 0.006374768  | 6.136227107 | 0.706242733 |
| DKFZP686J0529 | 0.007694194  | 6.06179968  | 0.706252326 |
| BUB1B         | 0.015838763  | 6.077016085 | 0.706267789 |
| SLC37A3       | -0.0095753   | 6.660342319 | 0.706488682 |
| LOC653189     | 0.01071631   | 6.053376872 | 0.7065297   |
| KRTAP21-1     | -0.010414125 | 6.124219315 | 0.706542799 |
| SSX8          | 0.009911522  | 5.898329807 | 0.706549623 |
| LOC648359     | -0.009650136 | 5.979301324 | 0.706579562 |
| LOC651515     | 0.010461389  | 6.016521276 | 0.706605161 |
| PAPOLB        | -0.008836098 | 6.020767771 | 0.706623647 |
| OR52K1        | -0.010421832 | 6.31861706  | 0.706636686 |
| COL9A3        | 0.00933843   | 6.200929701 | 0.706654291 |
| FTCD          | -0.007532984 | 6.179013976 | 0.706696779 |
| SLC2A7        | -0.009469683 | 5.961644626 | 0.706803657 |
| C21ORF58      | 0.006285872  | 6.083603672 | 0.706828439 |
| DPYSL5        | 0.010395436  | 6.256163974 | 0.706911465 |
| FLJ30679      | 0.008799396  | 6.103417323 | 0.706949826 |
| MAP3K7IP3     | -0.006396272 | 6.038809282 | 0.707008973 |
| LTK           | -0.012778329 | 5.988163857 | 0.707096807 |
| LOC649587     | -0.010838522 | 6.014876377 | 0.707191518 |

## DEG.infomation

|           |              |             |             |
|-----------|--------------|-------------|-------------|
| GIMAP2    | 0.014665568  | 6.437591762 | 0.707203221 |
| DMRTC2    | 0.011345706  | 5.925002159 | 0.707268784 |
| KRTAP1-5  | 0.00949237   | 6.07618417  | 0.707276435 |
| TSPY2     | -0.006548211 | 6.101789311 | 0.707315419 |
| ARHGEF5   | 0.009673772  | 6.118356917 | 0.707328922 |
| OR52R1    | -0.009668572 | 6.039161792 | 0.707385678 |
| LOC645208 | 0.010034584  | 5.952651646 | 0.707677088 |
| LOC647361 | -0.016248856 | 14.01603789 | 0.707701688 |
| TXNDC6    | 0.016205432  | 6.00338134  | 0.707723172 |
| BTN2A1    | -0.015976287 | 7.799819047 | 0.707736328 |
| ERGIC2    | 0.030975684  | 8.593285961 | 0.707754076 |
| LOC286467 | 0.00684409   | 6.164914566 | 0.707802505 |
| LRRC52    | 0.009901121  | 5.982891809 | 0.707842304 |
| NCAPH     | 0.016526442  | 5.96872899  | 0.707892864 |
| LOC648834 | -0.011187088 | 6.057342099 | 0.707910048 |
| PDLIM4    | -0.011078344 | 6.025012278 | 0.707972621 |
| LOC642475 | -0.009801411 | 5.976386025 | 0.708089385 |
| TTN       | 0.024511013  | 7.401004198 | 0.708158807 |
| LOC342897 | -0.009074672 | 6.126564835 | 0.708186072 |
| ZFH2      | -0.010526944 | 6.068795054 | 0.708193666 |
| LOC653581 | -0.008997636 | 5.998850673 | 0.708366241 |
| LOC652499 | -0.008967995 | 5.925015905 | 0.708456834 |
| LOC652677 | -0.009474924 | 5.928738058 | 0.708480266 |
| LOC643584 | 0.009540043  | 5.989703683 | 0.708576687 |
| PTPN20A   | 0.034296869  | 7.475873937 | 0.708580677 |
| KRTAP9-3  | -0.011123447 | 5.969467648 | 0.70865361  |
| LOC649144 | 0.008672739  | 6.166964148 | 0.708665755 |
| C9ORF57   | 0.010952851  | 6.209472018 | 0.708728679 |
| LOC642776 | 0.0094956    | 6.074492553 | 0.708740756 |
| LOC642832 | -0.010394148 | 5.939370768 | 0.708744402 |
| LOC643993 | 0.009305185  | 5.993420713 | 0.70874887  |
| LOC392781 | 0.00939335   | 5.952735197 | 0.708757479 |
| LOC647229 | 0.01122326   | 5.995770043 | 0.708824829 |
| CCDC114   | -0.009517994 | 5.999300446 | 0.70884998  |
| OLIG1     | 0.010603277  | 6.022744836 | 0.708893922 |
| AKAP14    | -0.005266408 | 5.955560923 | 0.708904076 |
| LOC400298 | -0.010406444 | 6.012059051 | 0.708923642 |
| CDX2      | -0.01131244  | 6.039387726 | 0.70895321  |
| LOC643634 | 0.009473471  | 5.943705292 | 0.709035055 |
| LOC642707 | 0.0095788    | 6.212023245 | 0.709046386 |
| RNASE10   | 0.011620894  | 6.620350266 | 0.709060339 |
| LOC653286 | 0.010112004  | 5.899518173 | 0.709090568 |
| LOC647134 | -0.009136081 | 6.05046139  | 0.709108177 |
| PMP2      | 0.022612804  | 6.759741482 | 0.709332874 |
| LOC284988 | 0.035931194  | 11.1790947  | 0.709383424 |
| FBXO36    | 0.009800762  | 6.016914825 | 0.709451423 |
| FAM75A7   | -0.009418008 | 5.972696886 | 0.709551605 |
| CCHCR1    | 0.013390181  | 5.998273691 | 0.709560521 |
| LOC647493 | -0.009129696 | 6.085178068 | 0.709732647 |
| RNF13     | -0.011409156 | 7.145520446 | 0.709835915 |
| C10ORF118 | -0.020245725 | 6.14278583  | 0.709957906 |

## DEG.infomation

|           |              |             |             |
|-----------|--------------|-------------|-------------|
| LOC646769 | -0.017120843 | 6.006929505 | 0.70996166  |
| LOC139542 | -0.009819971 | 5.982387536 | 0.709994267 |
| PRY2      | -0.010186227 | 6.166487404 | 0.710000806 |
| GTF3A     | 0.022631503  | 11.50367208 | 0.710029507 |
| UPK2      | 0.010168525  | 6.078630273 | 0.710166862 |
| LOC644215 | 0.009331613  | 6.021297124 | 0.710220797 |
| DUX2      | -0.012278137 | 6.114041868 | 0.710257899 |
| LOC642000 | 0.010554848  | 5.953165216 | 0.710265818 |
| HIST1H4A  | -0.010329159 | 5.93536329  | 0.71033465  |
| OR51B6    | -0.008661691 | 5.931105616 | 0.710458681 |
| LOC648374 | -0.008879254 | 6.053743793 | 0.710514158 |
| PDYN      | 0.011489496  | 6.27076491  | 0.710611636 |
| PCDHGB5   | -0.010168754 | 6.270410688 | 0.710620855 |
| HELB      | -0.009520043 | 6.105351486 | 0.710671734 |
| DEFB111   | 0.008918369  | 6.045658874 | 0.710686657 |
| WDR31     | -0.010661026 | 6.452794504 | 0.710707208 |
| LOC651075 | -0.010733374 | 6.443843774 | 0.710714265 |
| LOC641858 | -0.009014948 | 6.045003213 | 0.710818122 |
| PSG1      | 0.009715291  | 5.919095932 | 0.710825231 |
| MAMDC4    | 0.013231076  | 6.668523086 | 0.710866856 |
| LOC648154 | -0.006770432 | 6.022258854 | 0.710880037 |
| LOC646680 | 0.009479631  | 6.093759077 | 0.710908401 |
| ZADH2     | -0.021696216 | 8.878171777 | 0.710949844 |
| EFCAB4B   | 0.010526067  | 6.068471638 | 0.71099148  |
| TGFB1     | 0.008652431  | 6.007496611 | 0.710997464 |
| LOC653787 | -0.008812399 | 6.074125616 | 0.711084362 |
| OR2V2     | -0.008738429 | 6.096537484 | 0.711193113 |
| OVOS2     | -0.004887488 | 6.100569685 | 0.711354262 |
| LOC648309 | -0.009004066 | 6.164131145 | 0.711453674 |
| REG1B     | 0.010537392  | 5.958641707 | 0.71148751  |
| C17ORF73  | -0.010466147 | 6.436909312 | 0.711531514 |
| LOC645123 | 0.009094357  | 6.058603379 | 0.711718277 |
| NKX2-3    | -0.009927387 | 6.103859752 | 0.711766196 |
| LOC647802 | -0.008302345 | 6.242862219 | 0.711792292 |
| IGSF9B    | 0.018941195  | 7.146778599 | 0.711836691 |
| LOC643702 | -0.009193331 | 5.947881426 | 0.711890029 |
| MC5R      | -0.010074065 | 5.969429688 | 0.711902661 |
| IGSF9     | -0.009893441 | 5.943490536 | 0.711974848 |
| LRTM1     | 0.012515753  | 6.256677612 | 0.712075474 |
| LOC646706 | -0.010143832 | 5.976302799 | 0.71208564  |
| CCL1      | 0.009117827  | 5.957268054 | 0.712223247 |
| OR2M1P    | -0.006132114 | 6.023591625 | 0.712383026 |
| FBXL18    | 0.009179474  | 6.09328924  | 0.71247361  |
| OR52E5    | 0.008880421  | 6.096036824 | 0.712548521 |
| CHD3      | 0.010329917  | 6.19618293  | 0.712560627 |
| LOC388333 | -0.008444448 | 6.031335911 | 0.712602706 |
| OR6Q1     | -0.009678201 | 6.013565631 | 0.712619377 |
| LOC642169 | 0.008148633  | 6.122839065 | 0.712913731 |
| CTTNBP2   | 0.010433715  | 5.990058223 | 0.712924676 |
| ZAR1      | -0.01061184  | 5.974153812 | 0.712971637 |
| C1ORF52   | -0.016031306 | 8.86387503  | 0.713048131 |

## DEG.infomation

|           |              |             |             |
|-----------|--------------|-------------|-------------|
| LOC646631 | -0.007893672 | 6.070050828 | 0.713067598 |
| LOC643428 | 0.00889248   | 5.955108758 | 0.713068027 |
| LOC643285 | 0.011901717  | 6.076617065 | 0.713111428 |
| CTRL      | 0.010550107  | 6.263295343 | 0.713113865 |
| LOC642965 | -0.008700198 | 6.021947837 | 0.713122686 |
| TTC22     | -0.008733495 | 5.975251    | 0.713161337 |
| COMMD7    | -0.011399475 | 10.84557863 | 0.713175124 |
| MAGEA4    | -0.00696008  | 6.04166202  | 0.71319227  |
| LOC648761 | -0.008068672 | 6.167748575 | 0.713402586 |
| INSR      | 0.017134138  | 6.311015646 | 0.713688434 |
| LOC648859 | 0.008766986  | 6.065510348 | 0.713716413 |
| AMPD1     | -0.009884055 | 6.002929347 | 0.713730269 |
| LOC649379 | -0.011096486 | 5.939238587 | 0.714006571 |
| LOC650013 | 0.009918212  | 5.991044791 | 0.714161436 |
| NBR1      | -0.005978898 | 6.030943881 | 0.71422181  |
| LOC653789 | 0.008182158  | 5.953752013 | 0.714225313 |
| SLC36A3   | -0.007180665 | 6.034130728 | 0.714291448 |
| LOC649747 | -0.009263549 | 6.073249019 | 0.714320176 |
| LOC648689 | 0.009765641  | 6.183410363 | 0.71439075  |
| LOC652290 | 0.010148038  | 6.087045439 | 0.714469884 |
| KRTAP5-11 | -0.01063002  | 6.079661933 | 0.714569522 |
| LOC643406 | 0.009499527  | 6.018522433 | 0.714616391 |
| LOC642633 | 0.00910259   | 6.060793053 | 0.714702405 |
| CYP27C1   | 0.012730775  | 6.209840593 | 0.714795247 |
| UGT2B10   | 0.008412531  | 5.936921004 | 0.714889124 |
| LOC646812 | -0.008484885 | 6.050696824 | 0.714960892 |
| LOC541473 | -0.009951544 | 6.010036407 | 0.715030947 |
| CEACAM6   | 0.008894722  | 5.809927629 | 0.715125196 |
| ZSCAN22   | -0.009958971 | 6.068092858 | 0.715181775 |
| EXOSC10   | -0.011397736 | 8.619835985 | 0.715235797 |
| TPT1      | 0.011944173  | 14.18011338 | 0.715263856 |
| CKMT2     | 0.018938938  | 13.88423993 | 0.715278055 |
| LOC650341 | 0.009146126  | 5.985678369 | 0.715281626 |
| GABRD     | 0.009153072  | 6.26304793  | 0.715286158 |
| C6ORF64   | 0.013648588  | 7.100456112 | 0.715481744 |
| PCDHA7    | 0.005793596  | 6.057634842 | 0.715484752 |
| SPANXB1   | 0.006529972  | 6.110820591 | 0.715516745 |
| GLIPR1L2  | -0.009732316 | 6.191307786 | 0.715579185 |
| LOC653175 | 0.008268446  | 6.061456878 | 0.715664804 |
| LOC647935 | 0.00845168   | 6.133028947 | 0.715726386 |
| LOC642044 | 0.009088188  | 5.928601016 | 0.715779644 |
| WFDC8     | -0.007347794 | 6.123377976 | 0.715906444 |
| LOC389036 | 0.007769301  | 6.019229948 | 0.715979359 |
| LOC652049 | 0.009650228  | 6.115364275 | 0.716052745 |
| LOC727837 | -0.008730608 | 6.066987356 | 0.716124432 |
| LOC645463 | -0.008051878 | 6.026641481 | 0.716374576 |
| LOC654235 | 0.008977468  | 6.226033596 | 0.716397487 |
| USP44     | 0.007120553  | 6.046200317 | 0.716416606 |
| CPEB4     | -0.029130015 | 8.267129563 | 0.71649515  |
| C14ORF49  | 0.009131466  | 6.198867757 | 0.716616796 |
| LOC642072 | 0.010511432  | 6.184558496 | 0.716639713 |

## DEG.infomation

|           |              |             |             |
|-----------|--------------|-------------|-------------|
| C17ORF65  | 0.009838681  | 6.295875304 | 0.716684567 |
| MGC45800  | -0.009056326 | 6.076638399 | 0.716797692 |
| MGC34774  | 0.00955919   | 6.046283149 | 0.716870247 |
| NOS2A     | -0.006213881 | 6.100601305 | 0.717038018 |
| ABCG4     | -0.012286537 | 6.452815779 | 0.71705538  |
| OR9G1     | -0.006428288 | 6.0296328   | 0.717128836 |
| GREM1     | -0.006288853 | 6.15305682  | 0.717157835 |
| PLA2G4E   | -0.006686697 | 6.127533506 | 0.717186182 |
| LOC652630 | -0.009809921 | 6.197297918 | 0.717196038 |
| ZNF643    | 0.007088014  | 6.1136287   | 0.717226778 |
| ACAA2     | -0.022791377 | 9.827599796 | 0.717239179 |
| C12ORF72  | 0.011636997  | 6.038499604 | 0.717356111 |
| LOC652203 | 0.009844265  | 6.033191042 | 0.717520123 |
| TULP3     | -0.011022259 | 6.562821371 | 0.717572289 |
| GOLM1     | -0.009550667 | 6.29042107  | 0.717661976 |
| C14ORF73  | 0.006897627  | 6.123335377 | 0.717710217 |
| VSTM3     | 0.010907093  | 6.099315953 | 0.717782378 |
| EFS       | -0.007620512 | 6.293556704 | 0.717808748 |
| ELSPBP1   | -0.008808904 | 5.984720239 | 0.717935907 |
| LOC51145  | 0.008530704  | 6.045531997 | 0.717984712 |
| LOC653260 | -0.008895705 | 6.097980959 | 0.717987199 |
| KLHDC10   | 0.011439657  | 6.497135787 | 0.718106511 |
| CGB       | 0.00943029   | 6.33248161  | 0.7181794   |
| HERC2P4   | -0.007456757 | 5.974660497 | 0.718181325 |
| C17ORF41  | 0.004811342  | 6.096437047 | 0.718202833 |
| WARS2     | 0.028774784  | 6.670439334 | 0.718214903 |
| LOC642414 | 0.009509186  | 5.941511402 | 0.71821915  |
| HFE       | 0.006337095  | 5.975362737 | 0.718503505 |
| MLF1IP    | 0.013641889  | 6.022628702 | 0.718513021 |
| LOC646918 | -0.01008435  | 5.969256196 | 0.718556854 |
| LOC402198 | 0.008982539  | 5.922657569 | 0.718672473 |
| LOC653337 | -0.006599727 | 6.172150368 | 0.718713637 |
| PTH2R     | 0.008489177  | 6.074699901 | 0.718747328 |
| LOC642530 | -0.008084671 | 6.019634908 | 0.718762654 |
| HS3ST4    | 0.010511196  | 6.107453487 | 0.718929419 |
| DSCC1     | -0.016483405 | 6.241154554 | 0.71895528  |
| LOC650188 | 0.009659743  | 6.127222814 | 0.718994396 |
| HS6ST3    | 0.008559356  | 6.066981662 | 0.719080678 |
| RBM46     | 0.006359586  | 5.925639808 | 0.719106094 |
| GPR139    | -0.009614957 | 6.096694644 | 0.719182384 |
| HIST1H2BF | -0.008106311 | 6.10553003  | 0.719401942 |
| LOC642733 | -0.008597017 | 6.066988609 | 0.719734406 |
| LOC440896 | -0.008884623 | 6.038882141 | 0.719767407 |
| LOC400456 | -0.005610935 | 6.084458462 | 0.719814923 |
| GAGE6     | 0.012099715  | 6.071921323 | 0.719872577 |
| PCDH10    | 0.008997634  | 5.999620134 | 0.719933973 |
| LOC442465 | -0.009985767 | 5.817777628 | 0.719936356 |
| LOC642808 | -0.008783111 | 6.015382849 | 0.719968893 |
| ZNF569    | 0.008762331  | 6.001940636 | 0.720029054 |
| EML1      | -0.017042726 | 7.630900991 | 0.720124396 |
| KCNH4     | -0.010614854 | 6.211127312 | 0.720172342 |

## DEG.infomation

|           |              |             |             |
|-----------|--------------|-------------|-------------|
| LOC387756 | -0.009811906 | 6.0921426   | 0.720191078 |
| LOC642316 | -0.010723217 | 6.084765035 | 0.720203728 |
| LOC646403 | 0.009837926  | 6.11409746  | 0.720600728 |
| OR52W1    | -0.009759776 | 6.156563475 | 0.720661824 |
| LOC644838 | -0.006329584 | 6.040593576 | 0.720705134 |
| LOC647315 | -0.008486732 | 5.992072282 | 0.720706726 |
| OR51M1    | -0.010248655 | 6.096044262 | 0.720963556 |
| CTNNAL1   | 0.019994276  | 9.58083232  | 0.72108309  |
| FLJ37307  | 0.009244817  | 6.171187009 | 0.721160721 |
| LOC644695 | 0.007843974  | 6.018465018 | 0.721309685 |
| LRCH2     | 0.010728642  | 6.666818836 | 0.721413612 |
| LOC650713 | 0.008241213  | 6.03271015  | 0.721424908 |
| HOXD10    | -0.008989003 | 6.000838229 | 0.721494739 |
| LOC647360 | 0.014042535  | 6.05757684  | 0.721555469 |
| LRRTM4    | -0.010536648 | 6.544209314 | 0.721592411 |
| LOC652605 | 0.009140696  | 6.096797042 | 0.72167408  |
| CXADR     | -0.023368589 | 8.959885309 | 0.721689884 |
| IFT52     | 0.00906571   | 6.552139355 | 0.721758757 |
| UBE2U     | 0.008463241  | 6.247191185 | 0.721794856 |
| LOC441459 | 0.0087762    | 6.018772128 | 0.721897527 |
| IGFL4     | 0.010575742  | 6.013334718 | 0.721949942 |
| BGN       | -0.032181841 | 12.86541915 | 0.722104962 |
| LOC390956 | 0.008393115  | 6.170919629 | 0.722191535 |
| LOC643338 | -0.009051487 | 6.068662755 | 0.722217414 |
| CHID1     | -0.012084336 | 6.079477493 | 0.722276744 |
| C13ORF30  | 0.021447506  | 6.267482226 | 0.72229774  |
| LOC731742 | 0.013285029  | 6.19987704  | 0.722303252 |
| SLC6A7    | 0.0110332    | 6.135579435 | 0.722396771 |
| FOXRED1   | 0.018388828  | 8.809708065 | 0.722482318 |
| EFCAB4A   | -0.019202614 | 8.312632961 | 0.722517308 |
| LOC651794 | -0.00904636  | 6.024566579 | 0.722530966 |
| LOC644113 | -0.013742755 | 6.26406464  | 0.722577973 |
| C4ORF43   | 0.012430462  | 6.166646147 | 0.722638332 |
| EFNB1     | 0.013492985  | 7.32356514  | 0.722782562 |
| CGREF1    | 0.008910886  | 6.041952913 | 0.722796561 |
| UBE2MP1   | 0.00881557   | 6.139558233 | 0.722872588 |
| LOC650879 | -0.010292897 | 5.974963068 | 0.722901091 |
| LOC442582 | 0.018000612  | 6.055962881 | 0.722943761 |
| TMEM82    | -0.008581466 | 5.99245369  | 0.722969625 |
| LOC647451 | -0.0084974   | 6.21754691  | 0.723046768 |
| FGF21     | 0.006705174  | 6.094573532 | 0.723108308 |
| LOC651404 | 0.008258331  | 6.060453712 | 0.723161275 |
| LOC645681 | 0.008647469  | 6.040620826 | 0.72324872  |
| LOC650296 | 0.008561777  | 6.391843176 | 0.723277069 |
| LOC650295 | -0.007594054 | 5.931596929 | 0.723309976 |
| MGC88374  | -0.009127465 | 6.028284058 | 0.723396249 |
| TMEM25    | -0.015619748 | 6.425730115 | 0.723785912 |
| FLJ40235  | 0.009243363  | 5.943505492 | 0.723835527 |
| JOSD3     | 0.015313696  | 6.35924699  | 0.723980822 |
| LOC731396 | -0.008649207 | 6.311264519 | 0.724023992 |
| MAML3     | 0.012282535  | 5.929821403 | 0.724223803 |

## DEG.infomation

|           |              |             |             |
|-----------|--------------|-------------|-------------|
| FAM86B1   | -0.008789882 | 6.53131559  | 0.724241931 |
| C20ORF12  | -0.010480423 | 6.362012273 | 0.724246679 |
| C20ORF95  | -0.008892646 | 6.202998714 | 0.724299874 |
| LOC283914 | 0.008228477  | 6.117056655 | 0.724354711 |
| LOC642656 | 0.008400376  | 6.05005731  | 0.724398218 |
| TLR3      | 0.007426472  | 6.182451077 | 0.724420721 |
| NINJ1     | 0.019645127  | 9.618840649 | 0.724436987 |
| ITGB6     | -0.009005313 | 5.962988115 | 0.724461295 |
| CDSN      | -0.011090627 | 6.053471242 | 0.724508527 |
| TMEM141   | 0.018235481  | 8.286409904 | 0.724599189 |
| CKMT1B    | 0.010834287  | 5.959922489 | 0.724798712 |
| LOC647551 | 0.009506226  | 6.016126172 | 0.724809882 |
| LOC648691 | 0.009098013  | 6.181724792 | 0.724839515 |
| TRIM35    | -0.006307864 | 6.262610435 | 0.724840153 |
| C11ORF53  | 0.010295914  | 6.309907065 | 0.724841188 |
| LOC653487 | -0.010823034 | 5.931593398 | 0.724845815 |
| C19ORF52  | 0.012224317  | 8.08235855  | 0.724852418 |
| LOC652102 | 0.00846934   | 5.956706654 | 0.724857853 |
| DEFB108B  | 0.007635561  | 6.121477015 | 0.724927263 |
| BLK       | -0.010475263 | 6.037419539 | 0.724928782 |
| DSCR1L1   | 0.016780005  | 6.324628274 | 0.724991454 |
| LAYN      | -0.013799719 | 6.801995369 | 0.725011577 |
| C1ORF87   | 0.006068128  | 6.07225568  | 0.725140629 |
| LOC642946 | 0.009258168  | 6.298172052 | 0.725144248 |
| CELSR1    | 0.011016161  | 6.770740247 | 0.725286412 |
| CCDC110   | 0.01061393   | 6.168089976 | 0.725301365 |
| FLJ32810  | 0.006529027  | 6.194320955 | 0.725364903 |
| LOC647034 | 0.009014826  | 6.010282933 | 0.725546349 |
| LOC642252 | -0.004525033 | 6.085935909 | 0.725636264 |
| LOC641835 | -0.009476611 | 5.997174162 | 0.725747906 |
| NXF2      | -0.006831549 | 6.078743097 | 0.725786305 |
| S100B     | -0.008505965 | 5.928689418 | 0.725874242 |
| GJA5      | 0.011026593  | 6.451705902 | 0.726006471 |
| LOC645037 | 0.021430114  | 5.978712389 | 0.726058856 |
| SNX19     | 0.015488928  | 7.836630575 | 0.72638629  |
| NPHS1     | -0.009423681 | 6.038792444 | 0.726428108 |
| C21ORF37  | -0.009007598 | 6.306415008 | 0.726440643 |
| C8ORF51   | -0.00831902  | 6.358623868 | 0.726454551 |
| BTNL9     | 0.024171153  | 7.49653066  | 0.726514046 |
| LOC652045 | -0.009804702 | 6.244027383 | 0.726612914 |
| DAPK3     | 0.034621562  | 7.924332786 | 0.726630016 |
| B4GALNT2  | -0.008480527 | 6.003701164 | 0.72667686  |
| BVES      | -0.02053032  | 8.461654736 | 0.726840455 |
| LOC643693 | -0.008694959 | 6.062602119 | 0.726866737 |
| LOC400581 | 0.009114187  | 6.023656145 | 0.727015776 |
| HTATIP    | 0.01241216   | 6.65535687  | 0.727061281 |
| LOC651997 | -0.009739685 | 6.018948941 | 0.727069775 |
| SYNPO2    | -0.012619677 | 6.803433441 | 0.727071558 |
| LOC645450 | 0.008314952  | 5.898545246 | 0.727205968 |
| DDC       | 0.00797988   | 6.072183026 | 0.727257633 |
| GSDMC     | -0.031040315 | 6.88335044  | 0.727331504 |



## DEG.infomation

|           |              |             |             |
|-----------|--------------|-------------|-------------|
| LOC653424 | -0.008311925 | 6.016274156 | 0.727354402 |
| RASAL1    | -0.007838083 | 6.223497512 | 0.727418544 |
| LOC646981 | -0.010477448 | 6.170127842 | 0.727438948 |
| CCL5      | 0.031720942  | 7.331388441 | 0.72744357  |
| ZNF552    | 0.008414184  | 6.172511045 | 0.727518156 |
| LOC728320 | 0.01132471   | 5.97226273  | 0.727669215 |
| LOC653934 | -0.010036881 | 6.095350215 | 0.727676219 |
| TXNDC15   | -0.015599933 | 7.656232547 | 0.727727957 |
| LOC647193 | -0.008501096 | 5.944797307 | 0.727812314 |
| LOC647042 | 0.008751681  | 6.174071469 | 0.727824533 |
| LOC651506 | 0.011403158  | 6.069265842 | 0.727845487 |
| CNOT2     | 0.01521136   | 8.588962521 | 0.727880882 |
| PNLDC1    | 0.011871408  | 5.928110054 | 0.727933513 |
| SYCN      | -0.008432807 | 6.12306973  | 0.727988867 |
| LOC442711 | 0.011152202  | 6.373881053 | 0.72807385  |
| PCTK1     | -0.010460769 | 6.257362317 | 0.728144636 |
| KCTD1     | 0.009708127  | 6.150460292 | 0.72819068  |
| LOC646026 | 0.010095855  | 6.277884631 | 0.728250779 |
| ANKRD38   | -0.010387769 | 6.502117364 | 0.728282357 |
| C8ORF80   | -0.009251707 | 6.212265584 | 0.728362776 |
| SLURP1    | -0.009897381 | 6.010525456 | 0.728409371 |
| LOC647535 | 0.009449938  | 6.365526124 | 0.72846775  |
| SPINLW1   | 0.004765905  | 6.198618407 | 0.728544509 |
| SIRPD     | -0.009416158 | 6.197413832 | 0.728726236 |
| PSMB4     | 0.014655984  | 10.72915062 | 0.728769771 |
| LOC341651 | -0.008014942 | 6.002091341 | 0.728806141 |
| KRTAP13-2 | 0.008348446  | 6.012082885 | 0.728931796 |
| ZAK       | -0.022975529 | 11.42968663 | 0.728954559 |
| LOC643206 | 0.010814604  | 6.520543802 | 0.728966035 |
| STRC      | 0.007004072  | 6.292395078 | 0.729037633 |
| ELOF1     | -0.025737437 | 7.147586701 | 0.729038496 |
| SNX30     | -0.010481008 | 6.923001343 | 0.729140366 |
| STK32C    | 0.01560344   | 6.042737245 | 0.729197684 |
| LOC644048 | -0.007633982 | 6.091434295 | 0.729233187 |
| LOC653589 | 0.00845865   | 5.97402513  | 0.729315411 |
| OR1G1     | -0.009411529 | 6.044712637 | 0.729331936 |
| LOC390874 | -0.009647571 | 5.980300674 | 0.729424251 |
| LOC650799 | 0.008673698  | 6.071245995 | 0.729561938 |
| LOC643615 | 0.007845775  | 6.131687016 | 0.729595801 |
| C2ORF13   | 0.008324242  | 6.001786547 | 0.729629873 |
| LOC647035 | 0.00886929   | 6.074161974 | 0.72976362  |
| FLJ37228  | 0.009529592  | 6.256611507 | 0.729773584 |
| LOC653559 | -0.008188979 | 6.054144687 | 0.729830965 |
| THAP5     | 0.005473558  | 6.017090652 | 0.729891843 |
| TAF9B     | -0.008994607 | 5.900003233 | 0.73013969  |
| PANK4     | 0.014254303  | 7.601088778 | 0.73019282  |
| ERBB4     | 0.010521526  | 6.534028834 | 0.730277239 |
| C9ORF90   | 0.011947923  | 7.442119219 | 0.730286136 |
| LOC442147 | 0.009689061  | 5.928581079 | 0.730322592 |
| LOC646486 | -0.009370055 | 5.859501924 | 0.730373989 |
| LOC400942 | 0.007246978  | 6.029613655 | 0.730416722 |

## DEG.infomation

|           |              |             |             |
|-----------|--------------|-------------|-------------|
| OR7E91P   | 0.006449363  | 6.01097117  | 0.73042593  |
| LOC644207 | 0.007997871  | 6.094075843 | 0.730550506 |
| LOC441007 | -0.008515542 | 6.158300568 | 0.730592361 |
| LOC646360 | 0.007815956  | 6.239286449 | 0.730682077 |
| GPR143    | 0.011841819  | 6.155439042 | 0.730791691 |
| TRAT1     | 0.006104673  | 6.101848353 | 0.730814463 |
| PRO1853   | -0.03431334  | 7.439952826 | 0.730829063 |
| LOC646332 | 0.013435019  | 6.302496366 | 0.730890237 |
| MINA      | 0.006904174  | 6.363774569 | 0.730918525 |
| LOC650938 | -0.009161555 | 6.203429342 | 0.731044173 |
| LOC643813 | -0.008579008 | 6.069214346 | 0.731051387 |
| LOC641819 | -0.009602465 | 6.193743439 | 0.731106514 |
| LOC650518 | -0.012716167 | 11.21784942 | 0.731164957 |
| HHIP      | -0.005846259 | 6.036700208 | 0.731214628 |
| LMBR1L    | -0.014469465 | 6.29046909  | 0.731215899 |
| LOC652721 | -0.009097838 | 6.320016689 | 0.731318379 |
| IFNA14    | 0.007321812  | 6.177388171 | 0.731522428 |
| SH2D1B    | 0.009942823  | 6.01502477  | 0.731534134 |
| KCTD21    | -0.016987056 | 8.224314632 | 0.731594404 |
| SLED1     | 0.008630312  | 6.312320711 | 0.731632095 |
| LOC652803 | 0.00900125   | 5.947225644 | 0.73188505  |
| LOC730455 | 0.014603404  | 7.704586728 | 0.731945273 |
| LOC553158 | 0.012714259  | 5.900339544 | 0.732031383 |
| LOC641995 | 0.008155995  | 5.99547803  | 0.732116314 |
| RAB2A     | -0.018886701 | 7.960522602 | 0.732253426 |
| OR10G8    | 0.008782919  | 5.973337751 | 0.732280248 |
| SNX8      | 0.013122338  | 7.271047027 | 0.732283395 |
| COL3A1    | 0.048984452  | 10.3008275  | 0.732498634 |
| LOC642756 | 0.008823281  | 6.341411393 | 0.732657059 |
| THRAP3    | 0.012248295  | 6.877014533 | 0.732722626 |
| TREML2    | -0.009406941 | 6.242272324 | 0.732904451 |
| LOC646383 | 0.008846125  | 6.142043604 | 0.732911738 |
| LOC391429 | -0.014725012 | 6.149759892 | 0.733047704 |
| FBXL13    | 0.01162607   | 6.081405277 | 0.733171978 |
| OR51B4    | -0.00792183  | 6.052229105 | 0.733318605 |
| CXORF41   | 0.008485417  | 6.032971854 | 0.73331991  |
| LOC85391  | 0.011684177  | 6.105298441 | 0.733487532 |
| SLC9A2    | 0.013663525  | 6.015755065 | 0.733496975 |
| BIN2      | -0.009343504 | 6.010886611 | 0.733882714 |
| LOC643985 | 0.008298249  | 6.20751206  | 0.733884915 |
| OR8B2     | -0.008746631 | 6.015654642 | 0.733897537 |
| LOC647322 | -0.011441632 | 6.194139289 | 0.73397542  |
| TIMM10    | -0.042476065 | 9.600169527 | 0.734216468 |
| TIGD4     | 0.008618738  | 5.925902584 | 0.734219285 |
| GDF6      | 0.007522175  | 6.017303021 | 0.734301591 |
| LRPAP1    | -0.028064874 | 8.985398599 | 0.734419672 |
| FAM46C    | 0.027860677  | 7.835534321 | 0.734443603 |
| C1ORF222  | 0.007963857  | 6.191162614 | 0.734502231 |
| LOC728070 | -0.009149947 | 6.210364952 | 0.734680712 |
| LOC649947 | 0.007914484  | 6.06809772  | 0.734757586 |
| FGF4      | -0.011031761 | 5.906351223 | 0.734759864 |

## DEG.infomation

|               |              |             |             |
|---------------|--------------|-------------|-------------|
| GAN           | 0.00723115   | 6.122339452 | 0.734834353 |
| XAGE1         | 0.004164072  | 5.989937851 | 0.734869784 |
| SPDYA         | 0.004526912  | 6.081829063 | 0.734994448 |
| ZNF33A        | -0.00919775  | 6.8463591   | 0.735022911 |
| DAOA          | -0.008598064 | 5.981657465 | 0.735111045 |
| MGC39606      | -0.008744297 | 5.993067868 | 0.735193767 |
| OR6F1         | 0.008777067  | 6.086344344 | 0.735205965 |
| LOC653483     | -0.005823595 | 5.957844037 | 0.735246967 |
| LOC644299     | -0.007504607 | 5.967152371 | 0.735261973 |
| OPRS1         | -0.010491668 | 6.761705443 | 0.735274727 |
| DKFZP434E1119 | -0.009650689 | 5.894416411 | 0.735282962 |
| TRPC5         | -0.014953278 | 6.063193856 | 0.735412528 |
| OR52E6        | 0.008358106  | 6.205590284 | 0.735464247 |
| RAB40AL       | -0.008578415 | 6.043693415 | 0.73551288  |
| GRK7          | -0.010107484 | 5.90470425  | 0.73555888  |
| LOC645897     | 0.007563425  | 6.07424584  | 0.735721996 |
| B3GNT3        | 0.014550191  | 6.016069488 | 0.735783223 |
| MAPKBP1       | -0.010683364 | 6.509493855 | 0.735812587 |
| MBD3L2        | 0.008448859  | 6.070966858 | 0.735878108 |
| LOC643556     | -0.006292736 | 6.131461211 | 0.735902327 |
| SLC35E4       | 0.009478229  | 6.240705086 | 0.735903673 |
| R3HDML        | -0.010146592 | 5.935525236 | 0.73596313  |
| LOC642785     | 0.008405344  | 5.949482483 | 0.7360207   |
| TRIP6         | 0.013013553  | 8.551457693 | 0.736201397 |
| GRB7          | -0.005309153 | 6.076130911 | 0.736203301 |
| LOC644195     | -0.009418848 | 6.063205256 | 0.736256964 |
| LOC440981     | -0.008425619 | 5.900383928 | 0.736275503 |
| MUPCDH        | 0.006129346  | 6.029448822 | 0.736278598 |
| LOC653270     | -0.009976751 | 6.512766186 | 0.736343088 |
| LOC649282     | 0.008106044  | 6.229968297 | 0.736461608 |
| C10ORF96      | -0.00832141  | 5.953366534 | 0.736522977 |
| P4HA3         | -0.008572936 | 6.143367779 | 0.736534998 |
| LOC650611     | -0.01060762  | 6.143870599 | 0.736598754 |
| LOC400652     | 0.01156206   | 6.137916537 | 0.736646924 |
| LOC729967     | -0.009163711 | 6.016959039 | 0.736785629 |
| LOC645932     | -0.008394992 | 6.070806813 | 0.736897948 |
| OR10H5        | 0.006558911  | 6.047927801 | 0.73697257  |
| RNF126P1      | -0.006261688 | 6.548123771 | 0.73717397  |
| A4GNT         | 0.013461335  | 6.037934322 | 0.737230225 |
| LOC401720     | 0.01198535   | 6.426405507 | 0.737240255 |
| LOC647219     | 0.009283175  | 6.184649554 | 0.737286157 |
| PRAMEF9       | 0.01078885   | 6.051602908 | 0.737293483 |
| GFER          | 0.015642508  | 6.020776566 | 0.73739392  |
| EFNA2         | 0.008305816  | 5.93962399  | 0.737477213 |
| DOCK6         | 0.016326903  | 7.956819245 | 0.737548103 |
| LOC649179     | 0.006745728  | 6.156585512 | 0.737815515 |
| LIN28         | -0.008625879 | 5.889987182 | 0.73781719  |
| ESCO2         | -0.00898896  | 5.959525249 | 0.737860834 |
| GAL3ST1       | -0.009833253 | 6.010039399 | 0.738106565 |
| LOC152586     | 0.012393979  | 5.991783049 | 0.73810886  |
| KIAA0467      | -0.009085577 | 6.201736046 | 0.738204787 |

## DEG.infomation

|           |              |             |             |
|-----------|--------------|-------------|-------------|
| LOC647805 | 0.010950406  | 6.258356807 | 0.738243646 |
| FKBP6     | -0.008329336 | 6.045057044 | 0.738317561 |
| LOC647311 | -0.010760188 | 6.056408439 | 0.738384543 |
| UGT3A1    | -0.008215972 | 6.093918259 | 0.738401434 |
| C9ORF68   | -0.0063741   | 5.977516001 | 0.738440512 |
| OR51B5    | -0.006651242 | 6.001758253 | 0.738532943 |
| HSD17B1   | -0.011357192 | 6.333777352 | 0.738608525 |
| MORN1     | 0.008124417  | 5.989017776 | 0.738611768 |
| LOC643158 | -0.007623835 | 6.007056903 | 0.738741109 |
| NALP5     | 0.008436053  | 6.156031403 | 0.738764575 |
| TRAF5     | -0.006258854 | 6.220097865 | 0.738852496 |
| LOC642110 | -0.009927249 | 5.998261153 | 0.738919792 |
| ZNF689    | -0.014271146 | 8.093189722 | 0.739010715 |
| LOC441054 | 0.009183382  | 6.108730466 | 0.73910207  |
| OR6Y1     | -0.007608805 | 6.013186203 | 0.739196136 |
| CA11      | 0.011920025  | 6.593513329 | 0.739295927 |
| PCSK4     | 0.008791515  | 6.207237785 | 0.739332207 |
| MIXL1     | -0.008657432 | 5.905719714 | 0.73944395  |
| FLJ40330  | 0.006417185  | 6.168592901 | 0.739608486 |
| TTY1      | -0.011001312 | 6.074165793 | 0.739701928 |
| PLAC1L    | -0.007991144 | 6.042216838 | 0.739923231 |
| KCNK15    | -0.01197312  | 6.020597017 | 0.739941497 |
| LOC651436 | 0.021602078  | 12.46548248 | 0.739957115 |
| HTRA4     | 0.007955353  | 6.176036895 | 0.73996622  |
| MADD      | -0.010744968 | 7.09479984  | 0.740033788 |
| LOC645093 | -0.007869739 | 5.917762602 | 0.740038101 |
| LOC90379  | 0.00985507   | 6.929231225 | 0.740042855 |
| DBH       | -0.009182592 | 6.061212178 | 0.740049138 |
| LOC643763 | 0.007226158  | 5.967489746 | 0.74005228  |
| LOC652668 | -0.009089317 | 6.181859734 | 0.74006912  |
| LOC642662 | -0.008025856 | 6.102516205 | 0.740088463 |
| MGC13168  | 0.008962962  | 6.456663497 | 0.740106819 |
| CST11     | -0.005769748 | 5.97187486  | 0.740134642 |
| ADAMTS12  | -0.008431282 | 5.987314446 | 0.740226059 |
| LIPL3     | 0.010992324  | 5.988965856 | 0.740245963 |
| LOC646664 | 0.007668071  | 6.025020514 | 0.74027828  |
| LOC642118 | 0.008502067  | 5.988748406 | 0.740443348 |
| CPLX4     | -0.007986363 | 6.013396783 | 0.740497579 |
| WNT6      | -0.01117444  | 6.066842168 | 0.74053364  |
| GALNTL5   | 0.009488442  | 5.939569093 | 0.740636703 |
| LOC643327 | 0.00685095   | 5.982207007 | 0.740692354 |
| LOC645236 | -0.014771266 | 6.64804963  | 0.740775085 |
| FANCE     | 0.014471737  | 7.185145461 | 0.740827873 |
| PPAP2A    | 0.019068369  | 9.065418377 | 0.740844871 |
| NUCB2     | 0.019023738  | 9.007345473 | 0.740868145 |
| TIPIN     | -0.012345    | 6.231101351 | 0.741048086 |
| LOC652786 | -0.0078459   | 6.069089288 | 0.741099622 |
| C1ORF43   | -0.02354575  | 8.888891249 | 0.741117187 |
| ZNF528    | -0.006193183 | 6.143118877 | 0.741117351 |
| TPP1      | 0.015364568  | 9.386308764 | 0.741180243 |
| GNB4      | -0.010689888 | 6.470607787 | 0.741488028 |

## DEG.infomation

|           |              |             |             |
|-----------|--------------|-------------|-------------|
| SLC22A14  | -0.009501694 | 6.075697232 | 0.741880007 |
| LOC642566 | 0.008262342  | 6.053147327 | 0.741883063 |
| GALNT5    | 0.007617159  | 5.886944413 | 0.741891375 |
| CREG2     | 0.008239257  | 6.007074885 | 0.741932789 |
| LOC649864 | -0.009250669 | 6.230232451 | 0.742171761 |
| LOC649136 | -0.007379783 | 6.168032203 | 0.742222917 |
| LOC402634 | -0.008330558 | 5.877966839 | 0.742274662 |
| PINK1     | 0.019898632  | 9.706340561 | 0.742307648 |
| IRGQ      | -0.008088115 | 5.97794524  | 0.742339326 |
| GLB1L2    | 0.007990343  | 6.060182692 | 0.742491456 |
| LOC643038 | 0.007439753  | 5.997482093 | 0.742623213 |
| USP45     | 0.012505854  | 6.325490191 | 0.742659685 |
| DNAH7     | 0.009355618  | 6.23206738  | 0.742697991 |
| CDON      | -0.005208313 | 6.047661915 | 0.742791294 |
| LOC389832 | 0.00997761   | 6.126581314 | 0.742800631 |
| LOC642345 | -0.007389938 | 6.092034655 | 0.742865085 |
| OR8B12    | -0.009082553 | 6.163250427 | 0.742966734 |
| OR1D4     | -0.005290509 | 6.058016859 | 0.743058797 |
| C15ORF26  | 0.008709656  | 6.078471183 | 0.743129109 |
| GC        | 0.008166643  | 6.035363309 | 0.743165785 |
| LOC645416 | 0.008686721  | 6.232156111 | 0.743193298 |
| LOC652190 | 0.009594096  | 6.056943814 | 0.743216056 |
| RPS11     | -0.018126267 | 13.06982885 | 0.743225416 |
| KIAA0748  | -0.007760264 | 6.087748748 | 0.743264947 |
| C1ORF157  | 0.008335151  | 6.096222585 | 0.743314001 |
| FLJ45966  | 0.006955223  | 6.447713442 | 0.743504787 |
| ADAM3A    | 0.005147429  | 5.943102095 | 0.743543546 |
| LOC650076 | -0.008420072 | 6.077529026 | 0.743633533 |
| LOC642595 | -0.008264035 | 6.130072616 | 0.7436703   |
| LOC644883 | 0.007964727  | 5.995097812 | 0.743696076 |
| LOC51152  | -0.00786926  | 6.132223773 | 0.743783691 |
| TAS2R50   | -0.008973932 | 5.907997018 | 0.743902131 |
| RSPO1     | 0.008493521  | 5.89230364  | 0.743997812 |
| PLA2G12A  | -0.01119115  | 6.46919722  | 0.744082644 |
| LOC647025 | 0.007385697  | 6.154977071 | 0.744188207 |
| EIF5AL1   | -0.008540953 | 6.345734637 | 0.744205119 |
| USP34     | -0.014486606 | 7.892321041 | 0.744326321 |
| HOXD13    | 0.011030954  | 7.123900925 | 0.744375995 |
| LOC651695 | 0.012782172  | 6.070000465 | 0.744441493 |
| LOC649977 | 0.008355498  | 6.018099211 | 0.744544202 |
| LRRN1     | -0.007752578 | 6.129042961 | 0.744660745 |
| LOC651311 | -0.009297588 | 6.145806576 | 0.744710357 |
| LOC652141 | 0.007932406  | 5.935756613 | 0.74471491  |
| LOC646372 | -0.007572317 | 6.179238597 | 0.744762804 |
| ZSCAN10   | -0.008799021 | 5.928234122 | 0.744795191 |
| LOC440508 | -0.011467216 | 6.242880812 | 0.744869009 |
| SLC22A7   | -0.005154209 | 6.136914165 | 0.744887926 |
| FRS2      | 0.005272322  | 6.07035922  | 0.745083144 |
| LOC642804 | 0.010034483  | 6.098031926 | 0.745110213 |
| CD22      | -0.007830822 | 6.065988704 | 0.745120132 |
| ZNF329    | 0.010772128  | 7.928832428 | 0.745155614 |

## DEG.infomation

|           |              |             |             |
|-----------|--------------|-------------|-------------|
| COBLL1    | -0.01804558  | 9.055824695 | 0.745175451 |
| ATG16L1   | -0.010865232 | 8.187888541 | 0.745200491 |
| SNORD42A  | -0.008845904 | 5.810977491 | 0.745366015 |
| LOC727934 | 0.007910264  | 6.28110188  | 0.745392973 |
| LYPD3     | 0.009473833  | 6.204895267 | 0.745397784 |
| LOC440338 | 0.008923898  | 5.925996661 | 0.745465689 |
| HOXA6     | -0.009673568 | 6.337863482 | 0.745596121 |
| FLJ38973  | 0.012380861  | 6.333588486 | 0.745601394 |
| LOC648302 | -0.007248978 | 6.318853898 | 0.745610612 |
| SLC12A4   | -0.017175667 | 8.044420679 | 0.745637159 |
| LOC643647 | 0.008315067  | 6.011289731 | 0.745729977 |
| PTK7      | -0.008499841 | 6.157660674 | 0.745744287 |
| CAPZA2    | 0.015596147  | 11.48711616 | 0.745890858 |
| CC2D1A    | 0.009905305  | 6.583304094 | 0.745892319 |
| GLYCAM1   | -0.004586468 | 6.051825934 | 0.745932822 |
| SLC35B2   | 0.014111629  | 8.604627487 | 0.746007022 |
| LOC285484 | -0.008143518 | 6.081531097 | 0.746081494 |
| LOC652113 | -0.008018929 | 6.043412992 | 0.74611466  |
| CD177     | 0.009383546  | 6.060260288 | 0.746133296 |
| MGC71805  | 0.008999878  | 6.280826656 | 0.746169099 |
| SPATA21   | 0.008352421  | 5.973790818 | 0.746261505 |
| LOC440386 | -0.007431937 | 6.04011278  | 0.74629298  |
| LOC647297 | 0.007351892  | 6.105139483 | 0.746488604 |
| C14ORF144 | 0.005946754  | 6.123646789 | 0.746574671 |
| SIX6      | 0.00827308   | 5.936487521 | 0.746622978 |
| OGFOD1    | -0.010622369 | 8.150403279 | 0.746672622 |
| LOC646584 | 0.007740856  | 5.998658866 | 0.746768516 |
| OR8S1     | -0.0082458   | 5.949687836 | 0.747059748 |
| PRAMEF8   | 0.0086763    | 6.196223733 | 0.747084891 |
| C6ORF123  | -0.008282534 | 5.934049764 | 0.747087178 |
| IGF2BP1   | 0.010272451  | 6.113082303 | 0.747114381 |
| FAM69A    | -0.009353698 | 6.74189901  | 0.74747437  |
| TINAG     | 0.009356654  | 6.146698411 | 0.74754278  |
| P2RX1     | 0.012836103  | 6.378791232 | 0.747547532 |
| FRMPD2    | 0.003223344  | 6.022147505 | 0.747549187 |
| SSTR3     | 0.008774189  | 6.107186186 | 0.747705343 |
| FOXF2     | 0.008388615  | 6.149138632 | 0.747748766 |
| LPA       | -0.003686999 | 6.124217151 | 0.747791048 |
| LOC731884 | 0.008561829  | 6.132036632 | 0.747828296 |
| LOC642228 | 0.007661156  | 6.049699583 | 0.747950053 |
| LOC646617 | 0.008308101  | 6.075479116 | 0.747953991 |
| SF3B2     | -0.017652645 | 9.008708055 | 0.748016928 |
| PPAPDC1A  | 0.011432184  | 5.947047467 | 0.748042479 |
| LOC645006 | 0.00859641   | 5.957750536 | 0.748138404 |
| LOC402282 | -0.007293243 | 6.072297525 | 0.748225045 |
| KIAA0754  | -0.007526474 | 6.032153558 | 0.748233803 |
| NOX3      | 0.008519629  | 6.021233912 | 0.748372772 |
| PYGM      | -0.024013717 | 7.327364959 | 0.748451971 |
| MRPS18B   | 0.016059755  | 10.03942044 | 0.748542027 |
| ABCA8     | 0.026864029  | 8.944649082 | 0.748570753 |
| LOC729085 | 0.009219149  | 5.96976559  | 0.748634567 |

## DEG.infomation

|           |              |             |             |
|-----------|--------------|-------------|-------------|
| REM2      | -0.007887749 | 6.008240926 | 0.748766765 |
| MYT1      | 0.008292148  | 5.97449656  | 0.748783702 |
| LOC652848 | -0.008415667 | 6.077314556 | 0.749004115 |
| LOC644952 | -0.009020599 | 6.014060843 | 0.749069219 |
| LOC648089 | -0.006070749 | 6.110185744 | 0.749093831 |
| MTMR7     | 0.008613057  | 6.057411178 | 0.749137124 |
| LOC647987 | 0.008240044  | 6.124209419 | 0.749169012 |
| ATP2A1    | -0.00454673  | 6.059628988 | 0.749204555 |
| LOC134121 | 0.007866593  | 6.027937088 | 0.749349071 |
| LOC731017 | 0.0076667    | 6.064289655 | 0.749418737 |
| LOC441782 | 0.007227603  | 6.25259616  | 0.749445345 |
| LOC648609 | 0.007227601  | 6.12424039  | 0.749481858 |
| RNPC2     | 0.009820501  | 6.246481469 | 0.749511819 |
| LOC646079 | 0.008190578  | 5.974294932 | 0.749578801 |
| SYT1      | 0.007510898  | 6.069500455 | 0.749605216 |
| OSBPL5    | -0.010995463 | 7.801415682 | 0.74975302  |
| TR2IT1    | -0.005715465 | 6.016392893 | 0.749859752 |
| INTS6     | 0.013259243  | 7.872871607 | 0.749986647 |
| LOC653053 | 0.007246272  | 6.042148332 | 0.750043404 |
| LOC651898 | 0.007568957  | 6.064588834 | 0.750049935 |
| C21ORF84  | 0.008152117  | 6.006454445 | 0.750147023 |
| BCL2L13   | -0.018855298 | 10.87836673 | 0.750186737 |
| ENPP1     | -0.009048073 | 6.672455213 | 0.750262308 |
| LOC283867 | -0.008501877 | 6.179082952 | 0.750328429 |
| STRA8     | -0.007736782 | 5.933295125 | 0.750353121 |
| KRTAP6-1  | -0.007858313 | 5.917086514 | 0.750357568 |
| OR2T10    | 0.008415782  | 5.922164601 | 0.750444213 |
| LOC339760 | -0.007039758 | 6.258485344 | 0.750452534 |
| RPS4Y1    | 0.1435116    | 8.824464226 | 0.750714279 |
| CLEC11A   | -0.020163952 | 7.022023199 | 0.750739351 |
| GTF2H2    | -0.009211993 | 6.224427053 | 0.750803548 |
| OR4C45    | -0.008638979 | 6.210949631 | 0.750804106 |
| LOC642536 | 0.007826903  | 5.971588269 | 0.750907169 |
| OR1J1     | -0.006210818 | 6.259784078 | 0.750922456 |
| ALS2CR11  | 0.010493024  | 6.188540693 | 0.750947962 |
| LOC651951 | 0.007942438  | 6.063957097 | 0.751063437 |
| C10ORF68  | 0.007342089  | 5.979847637 | 0.751113434 |
| LOC340515 | -0.007386029 | 6.143704072 | 0.751199322 |
| LOC644396 | 0.007071804  | 6.061774217 | 0.751343848 |
| LOC338756 | 0.007016671  | 6.144673665 | 0.751367256 |
| AREG      | -0.007881762 | 6.020799564 | 0.75146428  |
| CD200R1   | -0.006682895 | 6.098592004 | 0.751496636 |
| GIMAP1    | 0.021168197  | 7.204812055 | 0.751570546 |
| LOC646160 | -0.007442158 | 6.01079584  | 0.751795181 |
| SPTBN2    | -0.008072596 | 6.317878681 | 0.751796793 |
| EFCAB1    | 0.007805034  | 6.056959202 | 0.751831828 |
| LOC643717 | 0.007189232  | 6.013409397 | 0.751891553 |
| LOC644479 | 0.008528219  | 5.983845052 | 0.751891721 |
| GABRR3    | -0.007436282 | 5.977575788 | 0.751977972 |
| LOC646590 | -0.007664397 | 5.954971743 | 0.752033919 |
| LOC652009 | -0.008878984 | 5.983842534 | 0.75207815  |

## DEG.infomation

|            |              |             |             |
|------------|--------------|-------------|-------------|
| GPS1       | -0.010130103 | 8.832771592 | 0.752164136 |
| PCDH21     | 0.012754644  | 6.058937192 | 0.752200358 |
| KIF6       | 0.009704712  | 6.785575677 | 0.752241265 |
| CTXN1      | -0.017200701 | 6.648320537 | 0.752306737 |
| LOC731714  | 0.007001493  | 6.02570774  | 0.752330575 |
| LOC642062  | -0.008705419 | 6.23362942  | 0.752400924 |
| LOC731682  | 0.018138099  | 6.128136011 | 0.752414326 |
| LOC647585  | -0.007524644 | 6.096106777 | 0.752703364 |
| STARD6     | 0.007261357  | 5.930156177 | 0.752805035 |
| CLDN19     | -0.008350213 | 6.289542869 | 0.752823584 |
| ANKRD19    | -0.007650985 | 6.03311903  | 0.752869986 |
| RNU12      | -0.008887487 | 6.118974799 | 0.752875199 |
| KIAA1586   | 0.008524521  | 6.273682057 | 0.753001743 |
| SSBP1      | 0.014746773  | 10.63250691 | 0.753077959 |
| MUM1       | 0.014230122  | 8.833640765 | 0.753093885 |
| ZNF292     | 0.009303722  | 6.15592564  | 0.753160417 |
| POTE14     | -0.008569072 | 5.912281118 | 0.753267642 |
| OR51D1     | 0.00973417   | 6.264060345 | 0.753302666 |
| LOC402679  | -0.007844704 | 6.037709594 | 0.753311348 |
| IL1F5      | -0.006190178 | 5.974219765 | 0.753406792 |
| IL12RB2    | -0.008162691 | 6.141329153 | 0.753452654 |
| LOC643825  | 0.007507892  | 6.055673893 | 0.753559161 |
| MGC48628   | 0.008445983  | 6.10251696  | 0.753563413 |
| OPN4       | -0.005433424 | 6.013035832 | 0.753629778 |
| LOC646550  | -0.007495539 | 5.97707845  | 0.753644583 |
| CSGALNACT1 | 0.018445446  | 7.331920179 | 0.75364659  |
| OR8B8      | -0.008405206 | 5.851858616 | 0.75365523  |
| C21ORF125  | -0.00851371  | 6.074045909 | 0.753760266 |
| SELV       | -0.008080149 | 6.065424121 | 0.753818393 |
| RG9MTD2    | -0.008833758 | 6.569966588 | 0.753833553 |
| LOC388743  | 0.007228231  | 6.121830245 | 0.753834849 |
| LOC641820  | -0.008168268 | 6.247000468 | 0.753846758 |
| FLJ32310   | -0.008603396 | 6.073316065 | 0.754039794 |
| SERPINA2   | 0.005665059  | 5.944205882 | 0.754103446 |
| LOC643040  | 0.008084009  | 6.072312979 | 0.754110298 |
| CD1D       | 0.012258158  | 6.436908834 | 0.754157644 |
| WASF1      | 0.00567789   | 6.063386183 | 0.754170354 |
| MRPS18A    | 0.018193681  | 8.387536278 | 0.754241447 |
| LOC441920  | -0.009387354 | 6.160793293 | 0.754262401 |
| NLRP6      | -0.008317211 | 6.116966663 | 0.754384339 |
| GRIP1      | 0.00559724   | 5.979550251 | 0.754410293 |
| LOC642263  | 0.00723129   | 6.032713727 | 0.754413619 |
| C8ORFK29   | 0.006884253  | 6.063141256 | 0.754539814 |
| LOC387686  | -0.008272726 | 6.279319315 | 0.754608897 |
| CDCA3      | 0.009291831  | 6.061704942 | 0.754655082 |
| NBPF1      | -0.004736395 | 6.220393857 | 0.754839158 |
| LOC126147  | -0.008246766 | 5.942985482 | 0.754883536 |
| LOC732343  | -0.006942091 | 5.969589802 | 0.754884239 |
| CD96       | -0.006927887 | 6.153061778 | 0.754935871 |
| H2AFV      | -0.009129232 | 6.791742389 | 0.754983302 |
| C12ORF28   | -0.009588749 | 6.24207707  | 0.755020395 |



## DEG.infomation

|           |              |             |             |
|-----------|--------------|-------------|-------------|
| LOC642570 | 0.010836334  | 6.286701611 | 0.755040797 |
| LOC642561 | 0.007325753  | 6.040485182 | 0.755084788 |
| SPRR2G    | -0.008328254 | 6.124367295 | 0.755118485 |
| CACNG2    | -0.008273372 | 6.014957154 | 0.75533144  |
| ANGPTL6   | -0.007110213 | 6.039729638 | 0.755359701 |
| FKBP10    | -0.011419374 | 6.190416221 | 0.755474244 |
| IL1RAPL1  | -0.025554154 | 7.259012395 | 0.755553793 |
| DEFB103A  | 0.007771382  | 6.060611614 | 0.755619798 |
| LOC732381 | 0.009035297  | 6.112815387 | 0.75577285  |
| FCN2      | -0.006454596 | 5.984807507 | 0.755790068 |
| LOC647965 | 0.008753613  | 6.157590162 | 0.755838247 |
| NUP98     | -0.006759248 | 6.618280936 | 0.755869234 |
| DLG7      | 0.009258808  | 6.130716579 | 0.755905744 |
| LOC439936 | -0.008735524 | 5.850125506 | 0.755962872 |
| GPX7      | 0.017055481  | 7.781422266 | 0.756058564 |
| WNT4      | -0.008643446 | 5.998161071 | 0.756145642 |
| MGC26647  | 0.008563393  | 5.98302789  | 0.756193361 |
| UFM1      | 0.015396884  | 8.129740484 | 0.756219628 |
| WDR6      | 0.015696276  | 9.7764317   | 0.756387253 |
| CIITA     | -0.012898733 | 6.021153009 | 0.756400627 |
| LOC729249 | -0.008317283 | 5.947888496 | 0.756408673 |
| LOC646895 | -0.005563469 | 6.078968298 | 0.756459934 |
| FLJ25169  | 0.008268969  | 6.233426934 | 0.756523539 |
| LOC649293 | 0.011820176  | 6.03193124  | 0.756601956 |
| TSPAN10   | 0.008803569  | 6.124503706 | 0.756684    |
| USO1      | 0.013166419  | 10.4754768  | 0.756770599 |
| RAB19     | 0.008112145  | 5.947469941 | 0.756851395 |
| CSNK1A1L  | 0.005975777  | 6.096588915 | 0.756981243 |
| MSL3L2    | -0.008328847 | 5.971022946 | 0.757067772 |
| CSF2RB    | 0.007478907  | 6.031482335 | 0.757144717 |
| PHB2      | 0.011177067  | 9.641523087 | 0.757219713 |
| ELAVL2    | -0.00668302  | 6.042854941 | 0.757300703 |
| OR2T3     | -0.008296596 | 5.926850052 | 0.757321976 |
| LOC285636 | -0.015284025 | 8.765418159 | 0.757429031 |
| LOC653882 | 0.007937819  | 5.951063976 | 0.757441784 |
| LOC642018 | 0.009088887  | 6.073611162 | 0.757549702 |
| TRAF3     | 0.009204614  | 6.39921729  | 0.757591864 |
| C6ORF25   | -0.004527289 | 6.197396405 | 0.757617805 |
| TRIM14    | 0.004392349  | 6.082759881 | 0.757677992 |
| HOXB8     | 0.008575106  | 5.980339582 | 0.757750983 |
| CARS2     | -0.014933504 | 7.604957358 | 0.757803437 |
| C12ORF42  | 0.007859307  | 5.850149801 | 0.757888686 |
| LOC641931 | 0.009952726  | 6.026468157 | 0.757981834 |
| OR8B4     | -0.008322566 | 6.027509471 | 0.758018744 |
| LOC158345 | 0.022949203  | 10.59962184 | 0.758343578 |
| ATCAY     | 0.008704303  | 6.075479548 | 0.758352979 |
| LOC391241 | -0.010500058 | 6.019629411 | 0.75836022  |
| C10ORF120 | -0.007524357 | 5.931048676 | 0.75847651  |
| LOC643771 | -0.009060567 | 5.956518782 | 0.758545011 |
| HIST1H2BB | 0.007420958  | 5.995640511 | 0.758752218 |
| PAX7      | -0.015150563 | 7.921062912 | 0.758757899 |

## DEG.infomation

|           |              |             |             |
|-----------|--------------|-------------|-------------|
| SPRED3    | -0.004850312 | 6.100267137 | 0.759034234 |
| PSMD1     | 0.014961334  | 9.880474923 | 0.759145772 |
| LOC652460 | -0.008072608 | 6.038190929 | 0.759214629 |
| SIAE      | -0.009715721 | 6.000572048 | 0.759244069 |
| GALR3     | -0.005478304 | 6.019796415 | 0.759400544 |
| LOC651919 | -0.011779337 | 6.120925161 | 0.759469323 |
| LOC644019 | -0.003514687 | 6.136917661 | 0.75955622  |
| LOC732138 | 0.010795968  | 6.013004614 | 0.759614745 |
| USP20     | 0.007086828  | 6.268270127 | 0.759615969 |
| CLDN6     | 0.008624758  | 6.0453148   | 0.759650636 |
| C16ORF69  | 0.010247209  | 6.334617053 | 0.759732689 |
| LOC647645 | 0.010419067  | 6.190929664 | 0.759821483 |
| LOC650830 | -0.007849367 | 6.225682755 | 0.759913173 |
| LOC388559 | -0.006525452 | 6.073290458 | 0.760058479 |
| CEBPZ     | -0.025378509 | 10.04562279 | 0.760101575 |
| EMP2      | -0.015896445 | 6.163043141 | 0.760148851 |
| MTF2      | 0.01751881   | 7.085806214 | 0.760219352 |
| RHOH      | 0.010136063  | 5.956107853 | 0.760227778 |
| DNAJB4    | 0.030847086  | 7.81932014  | 0.760323897 |
| LOC644136 | -0.007656968 | 5.984986915 | 0.760426567 |
| PCDHB9    | -0.019934659 | 7.192461865 | 0.760452085 |
| APOBEC3B  | -0.009866136 | 6.047722942 | 0.760471918 |
| CCDC85B   | -0.017885779 | 6.330773641 | 0.76058226  |
| C1ORF75   | 0.006445725  | 6.014834324 | 0.760689048 |
| TMEM76    | -0.007702504 | 5.95322982  | 0.76074787  |
| DAO       | 0.008201004  | 6.070286887 | 0.760802204 |
| BTC       | 0.007506525  | 6.135773649 | 0.760826236 |
| LOC653701 | 0.01398087   | 6.069168915 | 0.76084642  |
| LOC652589 | -0.007951915 | 6.325453578 | 0.761067341 |
| POU2F1    | 0.0141525    | 6.461464403 | 0.761224313 |
| GAGE4     | 0.015598124  | 6.157936256 | 0.761227693 |
| CRYBB3    | -0.007311744 | 5.962698345 | 0.761295498 |
| LOC643116 | 0.007574322  | 5.962535846 | 0.7613846   |
| PRKDC     | 0.011192938  | 7.439155342 | 0.761447093 |
| IL31      | 0.009582769  | 5.79010906  | 0.761476979 |
| LOC653512 | 0.011607118  | 5.934733217 | 0.761798524 |
| RNF187    | 0.009767392  | 6.640144374 | 0.761805686 |
| HOMER2    | 0.016723797  | 8.753014124 | 0.761845241 |
| LOC653971 | -0.007475794 | 5.966549394 | 0.761867998 |
| KIF4A     | 0.007436877  | 5.965796317 | 0.761870918 |
| LOC650776 | 0.009854343  | 5.824989668 | 0.761912974 |
| LOC650881 | 0.006849244  | 6.164131793 | 0.761913793 |
| ROPN1B    | -0.009347538 | 6.414010118 | 0.762028563 |
| PTCHD2    | 0.008331742  | 6.068150006 | 0.762042255 |
| ELOVL3    | -0.009057961 | 6.01292907  | 0.762076594 |
| KIF3A     | -0.008114329 | 6.041448629 | 0.762099713 |
| VGLL1     | 0.007814544  | 6.20227529  | 0.762141635 |
| SETD5     | -0.008914427 | 6.126248638 | 0.762157024 |
| LOC649963 | -0.007611444 | 6.033870628 | 0.762217501 |
| CDH4      | 0.008169419  | 6.080301416 | 0.762223086 |
| LOC649804 | 0.007189764  | 6.096810837 | 0.762392006 |

## DEG.infomation

|           |              |             |             |
|-----------|--------------|-------------|-------------|
| LOC149351 | 0.007956211  | 6.337168428 | 0.762451296 |
| ACCN4     | 0.004950658  | 6.051126251 | 0.762567016 |
| FLJ13614  | 0.008405159  | 6.167693498 | 0.762581934 |
| NRXN3     | 0.004764144  | 6.052800554 | 0.762835755 |
| GLI2      | -0.008199543 | 6.239661889 | 0.76284893  |
| CIB4      | -0.007117397 | 5.908593922 | 0.762870803 |
| LOC649905 | 0.008460838  | 5.965477062 | 0.762889099 |
| ARHGAP15  | -0.015236443 | 7.368087495 | 0.762908176 |
| LOC202134 | 0.00954035   | 6.186850543 | 0.762947385 |
| LOC646778 | 0.008399865  | 6.152637871 | 0.76298503  |
| SERPINA12 | -0.007474764 | 6.020925756 | 0.763034757 |
| CRLS1     | 0.018484342  | 11.12064011 | 0.763125897 |
| BCL11B    | 0.005934999  | 6.068550805 | 0.763157911 |
| LOC642207 | 0.008305124  | 6.033033213 | 0.763247397 |
| LOC644683 | -0.00611332  | 6.072259054 | 0.763584076 |
| SILV      | 0.007990911  | 6.124737593 | 0.763587901 |
| MFAP5     | -0.031339613 | 9.770758607 | 0.763677738 |
| FAF1      | -0.009427315 | 8.631976971 | 0.763769994 |
| TBX10     | -0.009109981 | 6.358218943 | 0.763812498 |
| FSCN2     | -0.006034866 | 5.976842205 | 0.7638664   |
| RNF139    | 0.0112644    | 5.985694594 | 0.763932749 |
| ANKRD5    | 0.00470453   | 5.957571336 | 0.764058372 |
| LOC653729 | -0.00899844  | 5.902858929 | 0.764073137 |
| ABP1      | 0.009188119  | 6.169796248 | 0.764094544 |
| USH3A     | 0.006870201  | 6.040861982 | 0.764155534 |
| NCK1      | 0.014560563  | 8.588573723 | 0.764251707 |
| LSM11     | -0.00784862  | 6.135884687 | 0.764272178 |
| MAGEA5    | 0.007625391  | 6.199430447 | 0.764275337 |
| SNAP25    | 0.006083238  | 6.382400603 | 0.764296925 |
| ANLN      | -0.008654325 | 6.268082815 | 0.764314869 |
| HIST1H3I  | 0.007763563  | 6.251223817 | 0.764329556 |
| FLJ27255  | -0.008447585 | 5.980538983 | 0.764480632 |
| ZNF618    | 0.006759504  | 6.692974663 | 0.764572887 |
| IL26      | 0.007128921  | 6.03492996  | 0.764677094 |
| MC2R      | 0.008223334  | 5.885259955 | 0.764761078 |
| LOC653606 | -0.007636412 | 6.083291766 | 0.764812593 |
| FLJ44790  | 0.010921289  | 6.106450871 | 0.764828698 |
| CLEC4D    | -0.012352839 | 5.987280877 | 0.764859828 |
| KEL       | 0.011482652  | 6.075440591 | 0.764904288 |
| LOC392221 | 0.008743898  | 6.164024253 | 0.764988685 |
| OR14C36   | -0.006674125 | 6.022735702 | 0.765062881 |
| KIAA0284  | 0.008113536  | 6.172973896 | 0.765173615 |
| CSTF2     | 0.011003928  | 7.553566806 | 0.765251258 |
| LOC652298 | 0.007644875  | 5.974054853 | 0.765290326 |
| C6ORF66   | -0.015932995 | 8.629315758 | 0.765308353 |
| RAB39     | 0.008266855  | 6.022561628 | 0.765322244 |
| EMR4      | 0.004287057  | 6.043997714 | 0.765564849 |
| CATSPER4  | 0.008399827  | 6.022153099 | 0.765598782 |
| LOC646373 | -0.006948066 | 5.981787332 | 0.765606886 |
| OR5P2     | -0.005226459 | 5.986246169 | 0.765608629 |
| LOC649495 | -0.007315262 | 5.941669744 | 0.765651014 |

## DEG.infomation

|           |              |             |             |
|-----------|--------------|-------------|-------------|
| OR52N4    | -0.009153461 | 6.01440227  | 0.765824028 |
| KRTAP2-1  | 0.005513196  | 5.956091687 | 0.76586234  |
| FAM55C    | 0.018928924  | 7.084154159 | 0.76586558  |
| LOC643801 | -0.006846697 | 6.049509689 | 0.765887309 |
| TMEM99    | -0.009452306 | 7.767394183 | 0.765917649 |
| PCDHGB1   | 0.008215659  | 6.250081946 | 0.766077864 |
| NDUFB11   | -0.014288729 | 12.10737942 | 0.766086232 |
| LOC150759 | -0.009576498 | 6.146458478 | 0.766089234 |
| C9ORF82   | 0.010007327  | 6.916859509 | 0.766136709 |
| IL21      | -0.007882393 | 6.035321711 | 0.766217287 |
| MMP8      | -0.006929262 | 5.911184428 | 0.766333659 |
| LOC650781 | -0.007312653 | 6.050876466 | 0.766410781 |
| LOC644024 | 0.007276764  | 6.130286708 | 0.766556912 |
| LOC652044 | -0.013084732 | 6.08482252  | 0.766579052 |
| LOC647650 | 0.011905644  | 6.380779763 | 0.766642124 |
| PXK       | 0.009659002  | 6.536548527 | 0.766645241 |
| HIST2H3C  | 0.00886446   | 5.954632676 | 0.766688101 |
| REN       | -0.00859995  | 6.202756019 | 0.766863766 |
| LOC646632 | 0.007475819  | 6.328861119 | 0.766964094 |
| LOC645373 | 0.007750216  | 6.044805801 | 0.767061712 |
| LOC646003 | 0.00712583   | 6.083058713 | 0.767120836 |
| FBP2      | 0.00855114   | 6.056608452 | 0.767175204 |
| FLJ11795  | -0.007953652 | 6.065287892 | 0.767247089 |
| 7A5       | 0.006868959  | 5.975353038 | 0.767251015 |
| KRT71     | 0.006959499  | 6.059013816 | 0.767345915 |
| LOC650757 | 0.007463646  | 6.434760337 | 0.767346872 |
| LOC642460 | -0.007164539 | 5.949978867 | 0.767355618 |
| MMP21     | 0.005178402  | 6.076816047 | 0.767474408 |
| KIAA1239  | -0.005740251 | 5.949264476 | 0.767518913 |
| LOC648453 | -0.006758012 | 6.029235897 | 0.767630284 |
| MFSD4     | 0.004501857  | 5.989616342 | 0.767679665 |
| CNO       | 0.018603151  | 7.707833993 | 0.767798603 |
| LOC644819 | 0.008310602  | 5.868535204 | 0.767853749 |
| ZNF497    | 0.00721849   | 6.091887054 | 0.76785617  |
| ARR3      | 0.008912336  | 6.019460869 | 0.767876354 |
| LOC728454 | 0.008481484  | 6.31667917  | 0.767915648 |
| KIR2DL5A  | 0.004047796  | 5.990916139 | 0.767917579 |
| EEDP1     | 0.013268925  | 6.9249622   | 0.767936185 |
| TCEB3B    | -0.007277476 | 6.000593597 | 0.768010492 |
| RG9MTD1   | -0.014213904 | 7.328391107 | 0.768083051 |
| SLC15A2   | -0.00950768  | 6.218577644 | 0.768159442 |
| CYORF16   | -0.009103908 | 6.090278218 | 0.768163829 |
| FAM132A   | 0.0095047    | 6.240395975 | 0.768235411 |
| LGSN      | 0.005320114  | 6.010939308 | 0.768534125 |
| C1ORF158  | -0.007861326 | 6.024715197 | 0.768632521 |
| CCT6A     | 0.01617938   | 8.677873236 | 0.768651331 |
| FRYL      | -0.005926412 | 6.748444329 | 0.768950813 |
| GSX1      | 0.011374721  | 5.951729327 | 0.769167103 |
| LOC646055 | 0.007405122  | 5.948206342 | 0.769169555 |
| LOC644111 | 0.009474162  | 6.091617021 | 0.769181565 |
| LOC401677 | -0.006773984 | 6.056319971 | 0.769245066 |

## DEG.infomation

|           |              |             |             |
|-----------|--------------|-------------|-------------|
| LOC152024 | -0.007239006 | 6.083367101 | 0.769289054 |
| CDCA7     | 0.008046643  | 6.352191198 | 0.769345142 |
| SDCCAG3L  | -0.008138126 | 6.248942873 | 0.769367832 |
| COL28     | 0.007305017  | 6.074129249 | 0.769463663 |
| SLC26A8   | -0.004079424 | 6.126284418 | 0.769609658 |
| FO XK1    | -0.014472888 | 7.889547145 | 0.769705682 |
| SLC35C2   | -0.009012545 | 6.605855021 | 0.769757553 |
| LOC649242 | -0.007198872 | 6.311879514 | 0.769831834 |
| LOC647008 | 0.008955414  | 5.889010602 | 0.769896525 |
| LOC651040 | -0.007372506 | 5.999771997 | 0.770000663 |
| SLC25A33  | -0.009085322 | 6.044339272 | 0.770110227 |
| RFX4      | 0.003505548  | 6.085646079 | 0.77012446  |
| MAPK8     | 0.005633115  | 6.101488361 | 0.770154183 |
| MYLK3     | 0.019495193  | 8.014797674 | 0.770386702 |
| CNOT1     | 0.012308385  | 8.258978806 | 0.770395482 |
| DPY19L2P4 | 0.0069323    | 6.029205482 | 0.770488999 |
| PTS       | 0.012938994  | 9.603859035 | 0.770510504 |
| C20ORF191 | 0.013118932  | 7.750169834 | 0.770517841 |
| LOC647713 | 0.006544766  | 6.085485204 | 0.770528825 |
| TRIM73    | -0.004861014 | 6.099824693 | 0.770899168 |
| MPV17L    | -0.009128504 | 6.410475031 | 0.770922696 |
| OR8G2     | -0.008353392 | 6.133645437 | 0.770947764 |
| XAGE3     | -0.005320877 | 6.06127623  | 0.770969737 |
| PDCD6     | -0.012261223 | 10.12429282 | 0.770982096 |
| PCDH11X   | -0.003495982 | 6.072393631 | 0.771186854 |
| FLJ39080  | -0.007003182 | 6.30499128  | 0.771256554 |
| LOC651624 | 0.007473343  | 6.151859231 | 0.771260073 |
| SH2D3A    | 0.007793017  | 6.053159894 | 0.77127242  |
| RPS27A    | 0.012160197  | 13.36885685 | 0.77139452  |
| SPATA4    | 0.009201618  | 6.29316454  | 0.771408872 |
| EPB41L2   | 0.012587946  | 7.434420206 | 0.771481005 |
| FAM90A11P | -0.006693914 | 6.029149099 | 0.771483034 |
| OPTC      | -0.007508271 | 6.13211928  | 0.771551393 |
| CNDP1     | 0.006156611  | 6.08544166  | 0.771587755 |
| GCN1L1    | -0.018111098 | 8.682456338 | 0.771592562 |
| TMSL8     | -0.011866912 | 6.355072317 | 0.771595228 |
| GPR173    | -0.004163157 | 6.103829782 | 0.771662636 |
| LOC648103 | -0.010615406 | 6.211902266 | 0.771856168 |
| GPR150    | -0.00811725  | 6.084304462 | 0.772142496 |
| LOC644976 | -0.004874978 | 6.07102842  | 0.772242628 |
| LOC648879 | -0.006664275 | 6.150228625 | 0.772366706 |
| DNAH17    | 0.008248233  | 6.000683339 | 0.772495386 |
| C17ORF50  | 0.007185171  | 6.038715835 | 0.772506378 |
| LRRC46    | 0.010850884  | 6.226171536 | 0.772575879 |
| B3GNT7    | 0.008159293  | 5.981119181 | 0.772679364 |
| LOC647435 | 0.007395995  | 6.033295126 | 0.772682263 |
| KCNK5     | -0.009928632 | 6.22992226  | 0.772894121 |
| DALRD3    | 0.005348512  | 6.231258111 | 0.772924575 |
| BLOC1S2   | 0.004732346  | 6.168976381 | 0.772927611 |
| LOC645757 | 0.007613273  | 5.888873036 | 0.772947728 |
| LOC649984 | -0.007641346 | 6.025725618 | 0.773042094 |

## DEG.infomation

|            |              |             |             |
|------------|--------------|-------------|-------------|
| LOC374768  | -0.006337195 | 6.096156613 | 0.773049069 |
| C12ORF8    | 0.00671187   | 5.994341642 | 0.773060963 |
| LOC286528  | 0.008313297  | 6.171692464 | 0.773076628 |
| LOC646357  | 0.008596348  | 6.00071333  | 0.773077385 |
| ST6GALNAC5 | 0.008786944  | 6.34692283  | 0.773200011 |
| LOC652880  | -0.007682372 | 6.112848143 | 0.773213922 |
| LOC653891  | 0.006270643  | 6.110647157 | 0.773236414 |
| C4ORF31    | -0.013540352 | 6.868432445 | 0.773325199 |
| LOC653499  | -0.007212851 | 6.067305266 | 0.773352475 |
| LOC283767  | -0.003926674 | 6.165998649 | 0.773369958 |
| C14ORF50   | 0.010438319  | 6.097713374 | 0.773389778 |
| TAAR6      | -0.007047008 | 6.068355089 | 0.773399766 |
| LOC390683  | -0.010975546 | 5.994397607 | 0.773409949 |
| LOC283412  | -0.030939675 | 9.873215202 | 0.773522988 |
| ARL11      | 0.007395596  | 5.951829036 | 0.773574362 |
| LOC728929  | -0.0063628   | 6.128888095 | 0.773700338 |
| LOC641905  | -0.007804632 | 5.887905671 | 0.773812242 |
| LILRP2     | -0.006503298 | 6.045706365 | 0.773876196 |
| LOC649355  | -0.007210163 | 6.223212499 | 0.773876875 |
| C2ORF73    | 0.006710689  | 5.890463681 | 0.773973424 |
| LOC649902  | -0.006436941 | 5.992119054 | 0.774311587 |
| PSG3       | -0.004873302 | 5.948203639 | 0.774318054 |
| TTLL13     | 0.009026105  | 6.070074755 | 0.774381093 |
| LOC402100  | 0.005368395  | 6.009674094 | 0.774425376 |
| PLAC1      | 0.007051028  | 6.095891423 | 0.774442319 |
| LYPD6      | 0.007252625  | 6.173991671 | 0.774448996 |
| SERPINC1   | 0.007527709  | 6.040875586 | 0.774452432 |
| RPP30      | -0.005535731 | 6.093639461 | 0.774593576 |
| MAP2K6     | -0.005151403 | 6.005723264 | 0.774622078 |
| C9ORF152   | 0.007692595  | 6.063037061 | 0.774624837 |
| RNF2       | -0.00803953  | 6.162961394 | 0.774731893 |
| CBWD2      | -0.008052901 | 5.959426341 | 0.774810277 |
| LOC653114  | -0.006683311 | 5.878280243 | 0.774862218 |
| TOP1P2     | -0.017174566 | 7.003802683 | 0.774980349 |
| LPO        | 0.007508253  | 6.005895931 | 0.775048487 |
| LOC644072  | 0.006836436  | 6.044845618 | 0.775095593 |
| LOC646861  | -0.007729766 | 6.10411581  | 0.775225169 |
| C1ORF61    | -0.007875036 | 5.944928636 | 0.775260868 |
| H2AFB2     | -0.010535462 | 5.93606307  | 0.775511544 |
| KIAA1345   | 0.005953475  | 6.104000128 | 0.775511564 |
| LOC645225  | 0.00728758   | 6.090124102 | 0.775592464 |
| SLC38A6    | -0.011536526 | 6.623568449 | 0.775728455 |
| C3ORF72    | -0.006679076 | 6.235964447 | 0.775799302 |
| LOC645434  | 0.008279951  | 6.386205545 | 0.775819175 |
| TNPO3      | 0.0139094    | 8.051192572 | 0.775832902 |
| IL17A      | -0.00750062  | 5.970809858 | 0.775940678 |
| LOC654053  | 0.011035982  | 6.207075742 | 0.775957448 |
| RER1       | -0.010657407 | 7.877421853 | 0.776001891 |
| LOC338588  | -0.008844037 | 6.209716194 | 0.776349634 |
| LOC644228  | -0.006964461 | 6.088012297 | 0.776369578 |
| LOC653163  | -0.007641268 | 6.294697261 | 0.776447381 |

## DEG.infomation

|           |              |             |             |
|-----------|--------------|-------------|-------------|
| DERL3     | -0.006038092 | 6.129764574 | 0.776525246 |
| LOC652327 | -0.00637009  | 6.136799206 | 0.776607366 |
| LOC643933 | -0.00738728  | 6.092484922 | 0.776621835 |
| LOC647649 | -0.0071087   | 6.1493223   | 0.776868951 |
| LOC651463 | -0.008255055 | 6.041176695 | 0.776917009 |
| TMEM196   | 0.006220236  | 6.047664327 | 0.776954226 |
| STK11IP   | -0.00964016  | 6.932615355 | 0.777057893 |
| LOC642773 | 0.009953372  | 6.05469917  | 0.777091013 |
| LOC646257 | -0.007143794 | 6.001796111 | 0.777147603 |
| LOC653198 | -0.005915046 | 6.063156498 | 0.777172896 |
| GRP       | -0.005287166 | 6.026897866 | 0.777237515 |
| LOC441239 | -0.005638887 | 6.023905614 | 0.777261366 |
| PPME1     | -0.011552014 | 7.963093731 | 0.777277524 |
| LOC646529 | -0.006084    | 6.068000658 | 0.777407675 |
| SNX9      | -0.007819679 | 5.897946119 | 0.777552865 |
| SLC32A1   | -0.007099519 | 5.906081445 | 0.777629247 |
| CSAG1     | 0.005490208  | 6.031891702 | 0.777697859 |
| IREB2     | 0.009247888  | 8.068823719 | 0.777743666 |
| CHCHD1    | -0.010215889 | 7.675973702 | 0.777806656 |
| RDHE2     | -0.009484121 | 6.07603597  | 0.777873567 |
| LOC647908 | 0.00681537   | 5.947375122 | 0.777881214 |
| C17ORF47  | 0.007750523  | 6.203833641 | 0.777931043 |
| RIMS2     | -0.008146168 | 6.012933201 | 0.778095781 |
| LOC391269 | 0.007850091  | 6.080595133 | 0.778106702 |
| ADAMTS20  | 0.004318045  | 5.996441041 | 0.77811624  |
| LOC441958 | 0.008794746  | 6.239011949 | 0.778164913 |
| FOXA1     | -0.006875549 | 5.997295747 | 0.778182052 |
| LOC646445 | -0.006262337 | 6.004371103 | 0.778398663 |
| ALDH3B2   | 0.004483755  | 6.04108231  | 0.77853205  |
| LOC648934 | 0.007337305  | 6.226659536 | 0.778542861 |
| CRIPAK    | -0.016148237 | 7.362499297 | 0.778556914 |
| LOC646764 | -0.007400432 | 6.089164268 | 0.778585483 |
| TLE1      | 0.018855955  | 6.786808229 | 0.778621199 |
| LOC643884 | -0.006788448 | 6.094719452 | 0.778685304 |
| GUCY1B2   | -0.007915514 | 6.127134004 | 0.778741154 |
| EIF1      | -0.0154317   | 11.86439417 | 0.778899348 |
| FIBP      | -0.01012475  | 8.758661989 | 0.778937903 |
| PRO0611   | 0.007015691  | 5.95961154  | 0.778989262 |
| LOC646473 | 0.006890543  | 6.067831876 | 0.778989443 |
| TOP2A     | -0.01340251  | 6.142565952 | 0.778989695 |
| CXYORF2   | 0.006848321  | 6.092937123 | 0.779049953 |
| LOC642685 | -0.007249159 | 5.987888664 | 0.779090315 |
| PCDH15    | -0.006308575 | 6.09023769  | 0.77911813  |
| ACVR2B    | -0.005373811 | 5.959651639 | 0.779131241 |
| MAST2     | -0.018923682 | 6.621981217 | 0.779430916 |
| SYNGR3    | 0.007173925  | 6.032567443 | 0.77945812  |
| ERCC6L    | -0.005070146 | 5.938260693 | 0.779576574 |
| CPB1      | -0.011488964 | 6.030629287 | 0.779605857 |
| FLJ44379  | -0.009522851 | 6.27128059  | 0.779639718 |
| LOXL2     | -0.007124667 | 5.956546173 | 0.779690388 |
| FAM26D    | 0.007068951  | 5.988201121 | 0.779725466 |

## DEG.infomation

|           |              |             |             |
|-----------|--------------|-------------|-------------|
| LOC402509 | -0.008752582 | 6.325164687 | 0.779732796 |
| LOC441052 | -0.008145108 | 5.937726115 | 0.77976551  |
| USP6      | -0.013324547 | 6.235182131 | 0.779818851 |
| PDXDC2    | 0.006421024  | 6.0302049   | 0.779907671 |
| SEPT12    | 0.010332271  | 6.273621803 | 0.779911232 |
| C20ORF186 | -0.00677612  | 5.962177194 | 0.779946526 |
| LOC645527 | -0.006058326 | 6.024925947 | 0.779964758 |
| LOC729317 | -0.010780948 | 11.35480414 | 0.779981562 |
| LOC651113 | 0.006411228  | 6.09671416  | 0.78012088  |
| ACAN      | -0.006779825 | 5.952898925 | 0.780134409 |
| TROAP     | -0.006874459 | 6.048840479 | 0.780155371 |
| LOC648473 | -0.008059358 | 5.926385363 | 0.780198728 |
| ACSBG2    | -0.006899331 | 6.074100612 | 0.780462309 |
| ZIM2      | 0.006477634  | 5.979935664 | 0.780463884 |
| LOC649557 | -0.006624866 | 6.092452704 | 0.780495114 |
| CTAGE6    | 0.005708518  | 6.200586671 | 0.780501576 |
| LOC644954 | -0.007227176 | 6.017189419 | 0.780605803 |
| LOC440518 | 0.00707337   | 6.3427325   | 0.780804909 |
| LOC651308 | -0.008340826 | 6.05305316  | 0.780866922 |
| PPFIBP2   | -0.012396818 | 7.454254597 | 0.780904401 |
| C1ORF14   | 0.006614054  | 5.973700269 | 0.781073981 |
| SERPIND1  | -0.006598821 | 6.014957909 | 0.781113766 |
| EID2      | -0.009967532 | 7.087225577 | 0.781167844 |
| MLN       | 0.006246988  | 6.047854019 | 0.781273488 |
| LOC651051 | 0.006450571  | 6.162992334 | 0.781616248 |
| LCTL      | -0.012114113 | 6.43197261  | 0.781678598 |
| NHEDC1    | 0.005637915  | 6.06390676  | 0.781702207 |
| CECR7     | 0.016589303  | 8.083163036 | 0.781734549 |
| FAM83F    | 0.008992402  | 6.211974364 | 0.781752003 |
| C15ORF2   | -0.009614156 | 5.968742719 | 0.781771651 |
| CD27      | 0.009106983  | 6.051875126 | 0.781815145 |
| ZNF335    | -0.01033595  | 6.158633561 | 0.78193142  |
| DDX12     | -0.002716053 | 6.102096237 | 0.781939827 |
| LOC284861 | -0.007580702 | 6.002424435 | 0.781948729 |
| BTBD10    | 0.014694368  | 7.97082342  | 0.781998325 |
| NDUFV2    | 0.014015192  | 12.03656155 | 0.782023535 |
| LAPTM4A   | -0.019566464 | 8.14567119  | 0.782095682 |
| BMP8B     | 0.010485154  | 6.298132845 | 0.782144043 |
| LOC254028 | -0.006911292 | 6.013593456 | 0.782155318 |
| C19ORF16  | 0.007998048  | 6.057852015 | 0.782266439 |
| WNT7B     | 0.005304668  | 6.114880293 | 0.782323769 |
| LOC641798 | 0.010005932  | 7.404637303 | 0.78232864  |
| DLEU7     | 0.006926618  | 6.009416802 | 0.782513898 |
| ONECUT1   | 0.005184638  | 6.065151388 | 0.782737607 |
| ETHE1     | -0.011347679 | 6.214753657 | 0.782751684 |
| TAS1R3    | -0.007262367 | 5.896666644 | 0.782864204 |
| MED31     | 0.009341822  | 5.961568394 | 0.782910742 |
| LOC652846 | -0.007561832 | 5.876995127 | 0.783129635 |
| JAKMIP1   | 0.009599752  | 5.915831208 | 0.783187804 |
| LOC440491 | 0.006243374  | 6.122392402 | 0.783195232 |
| IFNA1     | -0.007833903 | 6.000729928 | 0.783241204 |



## DEG.infomation

|           |              |             |             |
|-----------|--------------|-------------|-------------|
| FAM78A    | -0.008125012 | 6.379971385 | 0.78331012  |
| MGC51338  | 0.007108266  | 6.032131789 | 0.783336332 |
| DYNC1I2   | 0.010742213  | 9.687763528 | 0.783358552 |
| LOC650924 | 0.006629101  | 6.092411821 | 0.783384264 |
| ADAMTS14  | -0.004390335 | 6.066377291 | 0.783452025 |
| C9ORF84   | -0.004423007 | 6.084431991 | 0.783500298 |
| MGC26733  | 0.011542624  | 5.996050078 | 0.783649087 |
| LOC90342  | -0.011054251 | 6.058560433 | 0.783806086 |
| ZNF468    | 0.005992443  | 6.265199383 | 0.78383709  |
| LRFN2     | 0.006389263  | 5.924760034 | 0.783868051 |
| NDUFB10   | -0.015982195 | 12.54221666 | 0.783951959 |
| METTL11A  | -0.019230236 | 7.716768136 | 0.784055691 |
| OR4F6     | 0.006923903  | 5.977057855 | 0.784108021 |
| LOC644023 | -0.006434322 | 6.0702448   | 0.784138331 |
| UPP2      | -0.007250073 | 5.98162229  | 0.784202672 |
| NLGN4Y    | 0.008414249  | 6.03921463  | 0.784214327 |
| LOC126075 | 0.006813035  | 6.012226438 | 0.784612363 |
| C9ORF139  | -0.007526855 | 5.926515865 | 0.784699839 |
| LOC643982 | 0.0063086    | 6.006465018 | 0.784730932 |
| LOC387939 | 0.006819722  | 6.029509153 | 0.78480583  |
| LRRTM2    | -0.00713013  | 6.213745628 | 0.784882055 |
| LOC645947 | -0.006750048 | 6.033274551 | 0.784885923 |
| LOC139363 | 0.006890272  | 5.992126349 | 0.784928008 |
| ETV3      | -0.008018689 | 6.334767159 | 0.784994911 |
| OTX1      | -0.007942001 | 5.920791177 | 0.78504592  |
| TPTE      | 0.004736692  | 5.978654652 | 0.785059688 |
| IFNG      | -0.007099178 | 5.984851237 | 0.785183443 |
| OR5A2     | 0.008252494  | 5.866572698 | 0.785207336 |
| SFRS12IP1 | 0.007247858  | 6.157922527 | 0.785321377 |
| ENY2      | -0.011794321 | 10.72159362 | 0.785411657 |
| KIAA1462  | 0.006927265  | 6.319338856 | 0.78542506  |
| KLF14     | -0.007271117 | 6.040181706 | 0.785520354 |
| KTN1      | -0.024931394 | 9.549839151 | 0.785574048 |
| LOC651361 | -0.005796123 | 6.046452052 | 0.785610784 |
| TACR3     | 0.006574998  | 6.281361476 | 0.785667314 |
| FLJ44216  | 0.013339508  | 5.889470467 | 0.785676696 |
| C14ORF105 | -0.004906631 | 6.104617918 | 0.785725912 |
| POMC      | -0.015136833 | 6.757806702 | 0.78584575  |
| SLC2A2    | -0.006999739 | 6.058662625 | 0.785868445 |
| C20ORF151 | 0.009486961  | 5.909244262 | 0.785887092 |
| LOC652260 | 0.011488883  | 6.038783524 | 0.78589915  |
| LOC649023 | -0.009765905 | 6.150040139 | 0.786037416 |
| LOC651465 | 0.007159476  | 6.102436969 | 0.786315874 |
| C3ORF67   | -0.00760128  | 6.226529779 | 0.786340924 |
| LOC651732 | 0.006059468  | 6.000433869 | 0.786387793 |
| GJD2      | 0.0064729    | 5.987353703 | 0.786539752 |
| LOC649407 | 0.006213987  | 6.057983282 | 0.786567025 |
| ANGEL1    | 0.0090047    | 7.417748031 | 0.786605641 |
| LOC651808 | 0.006288088  | 5.969752447 | 0.786632229 |
| LOC645476 | -0.008702997 | 6.035955538 | 0.786701642 |
| RPLP1     | 0.010515691  | 13.2375227  | 0.786736377 |

## DEG.infomation

|           |              |             |             |
|-----------|--------------|-------------|-------------|
| GCM1      | 0.008088479  | 6.297754143 | 0.786739674 |
| LOC653366 | -0.006588525 | 6.061002832 | 0.786742957 |
| LOC203235 | -0.007157574 | 5.96113344  | 0.786746567 |
| GRIN3B    | 0.007318554  | 6.110156681 | 0.786867911 |
| INPP5E    | -0.015867418 | 7.304214211 | 0.786881403 |
| HIGD1A    | -0.012166678 | 11.68409152 | 0.787213842 |
| KIAA1147  | 0.010769198  | 7.600579926 | 0.787260251 |
| LOC649191 | 0.007174618  | 5.936566413 | 0.787261376 |
| LOC648830 | -0.006738468 | 5.947229067 | 0.787402994 |
| ALG6      | -0.010310373 | 7.152982969 | 0.787433372 |
| CALML5    | -0.009239066 | 6.087486167 | 0.787660224 |
| MZF1      | 0.01098151   | 7.627610066 | 0.787769085 |
| LOC646714 | 0.009283726  | 6.099485718 | 0.78784095  |
| FBXL16    | 0.00667288   | 6.036881801 | 0.787931485 |
| BTF3      | -0.010917472 | 11.59187671 | 0.787969157 |
| LOC650534 | -0.006385239 | 6.009552057 | 0.787993168 |
| GOLGA6    | 0.003801093  | 6.08939932  | 0.788077589 |
| BTBD14B   | -0.006778626 | 6.331329809 | 0.788086087 |
| LOC728799 | 0.006191414  | 6.061901308 | 0.788144664 |
| LOC650634 | -0.006212168 | 6.129973926 | 0.788181825 |
| LOC389958 | 0.007678069  | 6.089297857 | 0.788186557 |
| FAM83G    | 0.007384896  | 5.958704578 | 0.788274429 |
| LOC51233  | 0.007099387  | 6.066887659 | 0.788330797 |
| LOC646456 | 0.006015181  | 5.947278283 | 0.788365055 |
| CYSLTR2   | -0.010310599 | 6.032413239 | 0.788426074 |
| C9ORF79   | -0.00661202  | 6.291864088 | 0.788518196 |
| LOC642930 | -0.00652     | 5.998974733 | 0.788590613 |
| LOC387693 | 0.007696625  | 6.16061904  | 0.788603814 |
| KCNQ1DN   | 0.006996706  | 5.936860929 | 0.788605221 |
| SYCP2L    | 0.007296719  | 6.159816133 | 0.788625884 |
| LOC401220 | 0.006229698  | 5.98190194  | 0.788686478 |
| MGLL      | -0.010772292 | 7.932021851 | 0.788715198 |
| LOC652760 | -0.007074071 | 6.141489766 | 0.788768666 |
| SLC22A25  | -0.007659021 | 5.911972848 | 0.788832025 |
| SIGLEC8   | 0.008014927  | 6.122971669 | 0.788841494 |
| ZNF169    | -0.006638599 | 6.117042027 | 0.788963848 |
| RBM19     | -0.00423492  | 6.148992347 | 0.789159154 |
| LOC646094 | -0.007099493 | 6.111681251 | 0.789298013 |
| LOC653493 | -0.008032181 | 5.959837894 | 0.789364851 |
| SERPINI2  | -0.00666088  | 6.086123078 | 0.789385731 |
| MGC22014  | -0.004661488 | 5.990903457 | 0.789429123 |
| TBC1D25   | 0.006105096  | 6.525558137 | 0.78956133  |
| NRP2      | -0.004462687 | 6.040150308 | 0.789605783 |
| CCDC75    | 0.006454132  | 6.28432881  | 0.789628763 |
| SF3B5     | 0.015762695  | 9.928786012 | 0.789671369 |
| FLJ25439  | -0.00799398  | 6.237905185 | 0.789867835 |
| HMMR      | -0.007361593 | 6.153191226 | 0.790007879 |
| LOC653543 | 0.004861912  | 6.06654792  | 0.790035374 |
| LOC648264 | 0.007058758  | 5.984435411 | 0.790123572 |
| ARSA      | -0.011715573 | 6.797594588 | 0.790155996 |
| ARHGAP5   | -0.007797073 | 6.408353022 | 0.790194967 |

## DEG.infomation

|               |              |             |             |
|---------------|--------------|-------------|-------------|
| LOC652736     | -0.006307179 | 6.134719194 | 0.790369047 |
| POU6F2        | -0.006809401 | 5.982343763 | 0.790603226 |
| C1ORF187      | 0.005091315  | 6.026337563 | 0.790713994 |
| GPRASP1       | 0.00829381   | 6.141582677 | 0.790794155 |
| PRTN3         | 0.006531763  | 6.255388738 | 0.79086615  |
| FLJ35282      | -0.008639385 | 6.019242055 | 0.790867901 |
| RHPN1         | -0.00886603  | 6.433311168 | 0.790907304 |
| ARL4C         | -0.00838789  | 6.175816824 | 0.79093133  |
| LOC441347     | 0.00616331   | 6.096446416 | 0.791000438 |
| HBE1          | -0.006034399 | 5.982414557 | 0.791023433 |
| OR2G3         | 0.004553556  | 6.15324779  | 0.79106111  |
| PARP8         | 0.005220858  | 6.290883892 | 0.791067458 |
| RTN4          | -0.025374384 | 9.232091041 | 0.791089819 |
| IFNA4         | 0.005208013  | 6.150982241 | 0.791101486 |
| KRT77         | -0.007720716 | 6.004531478 | 0.791215556 |
| LOC652233     | 0.006167285  | 6.117227    | 0.791276859 |
| FLJ33534      | 0.006682558  | 6.071420145 | 0.791426754 |
| ADAMTS15      | 0.00754491   | 6.119631908 | 0.791459508 |
| CUTL1         | -0.018715408 | 8.998310943 | 0.79151158  |
| ORM2          | 0.006405574  | 5.991208119 | 0.791556184 |
| GPR27         | -0.010144573 | 7.344529551 | 0.791615514 |
| C19ORF63      | -0.005769044 | 6.295714464 | 0.791623542 |
| LOC652644     | 0.007087966  | 6.152142426 | 0.791635847 |
| RPL7A         | -0.021607229 | 8.579354152 | 0.791814784 |
| FLJ45803      | 0.006539129  | 6.023312382 | 0.791862851 |
| PLA2G4B       | -0.015491465 | 8.09483048  | 0.791874738 |
| FAM55A        | 0.006824807  | 6.019905341 | 0.791924561 |
| KCNA2         | 0.007097745  | 5.908505173 | 0.79208808  |
| C10ORF92      | -0.007280074 | 6.277857189 | 0.792121514 |
| OR2A12        | 0.006979662  | 5.931275251 | 0.792164835 |
| DKFZP434J1015 | -0.006102964 | 6.057299469 | 0.792240302 |
| LOC441120     | -0.005647727 | 6.360079209 | 0.792598196 |
| LOC652322     | 0.007442417  | 6.038149538 | 0.792665754 |
| LOC401072     | 0.006820768  | 6.068711574 | 0.79275783  |
| MGC45491      | 0.009580116  | 6.034218806 | 0.79282294  |
| STAT1         | -0.019532624 | 8.939505319 | 0.792823976 |
| SLTM          | -0.011779396 | 8.707537789 | 0.792853456 |
| LOC645852     | 0.005813122  | 5.993675933 | 0.792979208 |
| LOC392843     | 0.004646061  | 6.071687616 | 0.793006834 |
| MACROD2       | 0.004894786  | 6.004293433 | 0.793154558 |
| KRTAP4-5      | 0.006835718  | 5.995720745 | 0.793163155 |
| LOC648169     | 0.006629348  | 6.215227975 | 0.793424637 |
| LOC652809     | -0.006261386 | 6.12713446  | 0.793574887 |
| LOC340268     | -0.007773728 | 6.018085176 | 0.793580964 |
| LOC646795     | 0.005387585  | 6.196014348 | 0.793583204 |
| STARD9        | 0.008047086  | 6.115508787 | 0.793760569 |
| LOC644644     | -0.00695932  | 6.322278231 | 0.793811482 |
| LOC648674     | 0.006711893  | 5.975282942 | 0.793881326 |
| KCNK16        | -0.006556794 | 6.056036965 | 0.793977083 |
| FLJ41856      | 0.007017774  | 5.992007658 | 0.793987868 |
| CCDC67        | 0.006301163  | 6.016734252 | 0.794046679 |

## DEG.infomation

|           |              |             |             |
|-----------|--------------|-------------|-------------|
| ATOH7     | 0.00494772   | 6.049183708 | 0.794054012 |
| LYPD4     | -0.008656272 | 6.073873777 | 0.794094747 |
| ITIH3     | 0.0089485    | 6.19923181  | 0.794128155 |
| LOC651991 | -0.006979854 | 5.951665052 | 0.79414961  |
| KRT79     | 0.006730116  | 6.03682735  | 0.794166291 |
| PSMD6     | 0.009718241  | 10.40880853 | 0.794175015 |
| LOC649771 | 0.006642653  | 5.896970257 | 0.79419741  |
| LOC643381 | 0.006958791  | 6.000663269 | 0.79436857  |
| LOC732391 | -0.006251666 | 5.953749608 | 0.7944709   |
| LECT1     | 0.00555564   | 6.217554833 | 0.794536949 |
| LOC645365 | 0.009866686  | 6.094423262 | 0.794594985 |
| LOC647786 | 0.005805687  | 6.060420249 | 0.794690467 |
| LOC150207 | -0.005927067 | 6.033562593 | 0.794697332 |
| PYY2      | 0.005260613  | 5.985126351 | 0.794709361 |
| LOC643240 | 0.008210961  | 6.546645473 | 0.794790469 |
| LOC641957 | 0.006588162  | 6.077230688 | 0.794923271 |
| LOC652779 | -0.006276056 | 6.070584227 | 0.795150159 |
| LOC391770 | 0.006237261  | 6.217205847 | 0.795178804 |
| HSF5      | -0.004999545 | 5.91991246  | 0.79526285  |
| B3GALT3   | 0.006560384  | 6.185382762 | 0.795347566 |
| LOC650749 | 0.007982188  | 6.156120242 | 0.795470349 |
| SNX15     | -0.006429403 | 6.451787473 | 0.795493563 |
| ALOX12    | -0.006977248 | 6.034126653 | 0.795627649 |
| LCE1E     | -0.005367631 | 5.970474592 | 0.795644463 |
| LOC651963 | -0.007081784 | 6.116605582 | 0.795666106 |
| OR52N1    | -0.006306827 | 6.043504962 | 0.795792836 |
| C1ORF51   | 0.021827288  | 6.992196161 | 0.795794995 |
| CNTNAP5   | 0.005722225  | 6.196048024 | 0.795819614 |
| LOC388922 | 0.005137542  | 6.041617122 | 0.795937334 |
| LOC728758 | 0.008055047  | 6.541118884 | 0.795961752 |
| LOC645953 | 0.007142531  | 5.997326684 | 0.796006868 |
| NR2E1     | 0.004948183  | 6.235756523 | 0.796167017 |
| PLCL4     | -0.007638853 | 6.042970066 | 0.796428399 |
| LOC643903 | 0.007295541  | 6.15737499  | 0.796454569 |
| SNORD101  | 0.005990171  | 6.017852378 | 0.796533107 |
| OR51I2    | -0.006581851 | 6.059744118 | 0.796542073 |
| LOC441762 | -0.011534279 | 5.954419076 | 0.796566734 |
| LIPH      | 0.00822708   | 6.202508992 | 0.796604808 |
| LOC642993 | -0.007459087 | 6.018310128 | 0.796616522 |
| ARHGEF15  | 0.0112889    | 6.495261665 | 0.79671034  |
| POLD3     | -0.005129998 | 6.3897026   | 0.796741376 |
| OR11H12   | -0.006523449 | 6.081707936 | 0.79687016  |
| MREG      | 0.006598618  | 6.147102317 | 0.797034756 |
| LOC652377 | -0.010074659 | 6.559854283 | 0.797174112 |
| LOC649186 | -0.005774991 | 6.261410505 | 0.797261157 |
| LOC646215 | 0.006080274  | 5.85372425  | 0.797343992 |
| RABEP2    | 0.005501506  | 6.051335669 | 0.797385234 |
| C11ORF88  | -0.006349912 | 5.993584698 | 0.797555898 |
| FUT7      | -0.009035803 | 6.109937336 | 0.797710725 |
| LOC648213 | -0.007859624 | 6.250829409 | 0.797729452 |
| LOC647251 | 0.006433949  | 6.23819438  | 0.797796073 |

## DEG.infomation

|           |              |             |             |
|-----------|--------------|-------------|-------------|
| FAM151A   | 0.006692909  | 6.103038207 | 0.798016147 |
| PRR15     | -0.00627603  | 6.105626771 | 0.798075567 |
| LOC643757 | -0.006784256 | 6.189872848 | 0.79809684  |
| FAM70A    | 0.004636763  | 6.075381534 | 0.79819926  |
| PAQR9     | 0.013189635  | 7.211966292 | 0.79826189  |
| MGC40170  | 0.008117301  | 6.173821221 | 0.798346742 |
| SCFD2     | -0.00893161  | 6.343397157 | 0.798399469 |
| LOC643815 | 0.011658271  | 5.968591285 | 0.798427243 |
| LOC220998 | 0.005605521  | 5.989084652 | 0.798483407 |
| CCT6B     | -0.013349317 | 6.982870981 | 0.79859421  |
| LRRC3     | -0.008093936 | 6.445519574 | 0.79860795  |
| KNDC1     | 0.003945552  | 6.103977633 | 0.798678559 |
| LOC653081 | 0.005496691  | 6.143708577 | 0.798882213 |
| VAV2      | 0.011921707  | 6.210698963 | 0.798919441 |
| LOC650632 | 0.007670913  | 6.15859982  | 0.799013268 |
| LPGAT1    | 0.007595724  | 6.388076784 | 0.799065211 |
| NR1I3     | -0.004669421 | 5.9801644   | 0.799066205 |
| LOC647949 | 0.005883699  | 6.022792526 | 0.799224633 |
| HEATR4    | -0.006356367 | 5.983106941 | 0.799397836 |
| NAT2      | -0.006807375 | 6.066924433 | 0.799431259 |
| STX18     | 0.006829691  | 6.256376301 | 0.7994495   |
| LOC647955 | -0.007211203 | 6.123979686 | 0.799453615 |
| KCNJ9     | -0.006534734 | 5.949975439 | 0.799454787 |
| WDR88     | 0.007886019  | 5.949173217 | 0.799525761 |
| DCXR      | 0.01145515   | 10.16404703 | 0.799562936 |
| BTN1A1    | 0.005912164  | 5.891744876 | 0.799684275 |
| ADD2      | 0.003964426  | 6.052751512 | 0.799692183 |
| LOC647190 | -0.006342044 | 5.964355701 | 0.799696389 |
| LOC645797 | 0.006625527  | 6.013159075 | 0.799701772 |
| MYH13     | -0.006866123 | 5.906312724 | 0.799798998 |
| WNT10A    | 0.005977677  | 6.126214696 | 0.79985782  |
| LOC441056 | 0.006293945  | 6.03455843  | 0.800063125 |
| MBNL3     | 0.005815767  | 6.289341906 | 0.800142909 |
| HARS      | -0.010145557 | 9.528111916 | 0.800161062 |
| TBC1D2B   | -0.012412103 | 7.784682099 | 0.800237187 |
| KRT9      | -0.007689308 | 6.58589336  | 0.800238112 |
| LOC652659 | 0.006545952  | 6.220233004 | 0.800305901 |
| OR10C1    | -0.006661441 | 6.004126712 | 0.800324009 |
| C20ORF74  | -0.006689306 | 6.094482811 | 0.800412756 |
| LOC653346 | 0.006055756  | 6.101721902 | 0.800466461 |
| CIDECF    | 0.008600169  | 6.29738414  | 0.800488264 |
| LOC644846 | 0.005723217  | 6.119204665 | 0.800561428 |
| LOC652775 | -0.007390896 | 6.296893863 | 0.800917901 |
| MAGEH1    | 0.008638232  | 6.912718152 | 0.801151147 |
| KRT7      | -0.006994919 | 6.129255975 | 0.801226468 |
| LOC643175 | -0.006594534 | 6.136155488 | 0.801294459 |
| SRCRB4D   | 0.008371983  | 6.142758811 | 0.801408516 |
| LOC730744 | -0.010984738 | 10.53988173 | 0.801490089 |
| OR5D14    | -0.005983234 | 6.080896873 | 0.801496089 |
| LOC648370 | -0.00606061  | 6.169157623 | 0.801512197 |
| CLCN1     | -0.007106931 | 6.030117763 | 0.801525274 |

## DEG.infomation

|           |              |             |             |
|-----------|--------------|-------------|-------------|
| ZNF525    | -0.006889548 | 6.317081624 | 0.801537085 |
| FLJ37396  | -0.007488163 | 6.460967611 | 0.801578075 |
| LOC652712 | 0.008131086  | 5.962655096 | 0.801642491 |
| LOC650921 | 0.006504081  | 6.156053566 | 0.801657136 |
| CES2      | -0.019277877 | 8.973727362 | 0.801803704 |
| LOC646461 | 0.006022655  | 6.043242422 | 0.80182394  |
| LOC653284 | 0.005613774  | 5.997209643 | 0.802141125 |
| CEBPA     | 0.015448365  | 6.588261358 | 0.80214249  |
| DSCR8     | 0.004173427  | 6.171374937 | 0.802412192 |
| IL8RA     | -0.008384875 | 5.993815295 | 0.802430829 |
| C12ORF56  | -0.006018066 | 6.123059103 | 0.8024523   |
| TBX20     | -0.003800039 | 6.151970475 | 0.802500983 |
| OR4D10    | 0.004762283  | 6.218266127 | 0.802546547 |
| LOC390427 | -0.005723755 | 6.005770123 | 0.802557156 |
| ATP10A    | 0.007760443  | 6.270236509 | 0.802609646 |
| FAM19A5   | -0.006977119 | 6.081492611 | 0.802712264 |
| RFFL      | 0.005115841  | 6.350696006 | 0.802733288 |
| LOC649184 | 0.006442958  | 6.057459452 | 0.802774255 |
| LOC399706 | -0.006308593 | 5.866797638 | 0.802882486 |
| DGAT2L3   | 0.006537968  | 6.063439702 | 0.802902722 |
| LOC646176 | -0.006437598 | 5.958209128 | 0.80293238  |
| LY6D      | 0.006539777  | 6.03273813  | 0.802980816 |
| LOC643444 | 0.006425703  | 6.184652028 | 0.803001842 |
| LOC344167 | -0.007195848 | 6.257304232 | 0.80306942  |
| EPO       | 0.00599914   | 5.903421869 | 0.803112753 |
| ANK3      | 0.01620764   | 7.804019899 | 0.803132897 |
| SAMM50    | 0.012875468  | 10.65643436 | 0.803191343 |
| CALML3    | -0.006564847 | 6.060129168 | 0.803298074 |
| ROBO2     | -0.00430435  | 5.987712735 | 0.803304734 |
| MAPK1     | 0.006871988  | 7.188616991 | 0.803363615 |
| KCTD8     | 0.006934154  | 6.184516484 | 0.803412909 |
| NKAIN4    | 0.005666714  | 6.024293897 | 0.803480328 |
| LOC650851 | 0.006456519  | 6.06909867  | 0.803602916 |
| ABHD12    | 0.009976054  | 7.407921502 | 0.803614593 |
| C18ORF54  | -0.004908598 | 6.419208462 | 0.803672386 |
| ANKRD34C  | -0.00655237  | 6.144137691 | 0.803860435 |
| LOC648025 | -0.007737104 | 5.912503012 | 0.803914509 |
| LOC653978 | -0.006513823 | 6.12560014  | 0.804004573 |
| RPGRIP1   | -0.006988705 | 5.920551034 | 0.80401127  |
| OR13F1    | 0.006291591  | 5.881348896 | 0.804020117 |
| CR2       | 0.003666103  | 6.021145064 | 0.804057964 |
| IL1F7     | 0.004175805  | 6.092220612 | 0.804212599 |
| MMP20     | -0.004961164 | 5.967202517 | 0.804245635 |
| LOC441368 | 0.006118365  | 6.101669093 | 0.80429725  |
| C2ORF57   | -0.00605907  | 6.132963818 | 0.804334904 |
| MMP27     | 0.006225556  | 6.103812754 | 0.804398667 |
| LOC652483 | -0.006163451 | 6.016765092 | 0.804466557 |
| PCK1      | 0.00497513   | 5.997515402 | 0.804498372 |
| LOC642147 | 0.005179792  | 5.999374142 | 0.804658084 |
| FLJ22639  | -0.008040807 | 6.297110888 | 0.804718287 |
| SPECC1    | -0.004897489 | 6.127744798 | 0.804847966 |

## DEG.infomation

|           |              |             |             |
|-----------|--------------|-------------|-------------|
| SPAST     | -0.007291365 | 6.629545403 | 0.804903144 |
| LIPK      | -0.005538339 | 6.072400564 | 0.804915783 |
| SLC5A4    | -0.00689621  | 5.949151924 | 0.804975896 |
| XPNPEP2   | -0.006745392 | 6.588447603 | 0.805109975 |
| LOC652683 | -0.00571483  | 6.104919262 | 0.805202081 |
| LOC728660 | 0.006428773  | 6.108217456 | 0.805233144 |
| WDR21A    | -0.010189893 | 7.154351302 | 0.805372661 |
| TSGA13    | 0.006293749  | 6.029416323 | 0.805376186 |
| ALX4      | 0.006554951  | 5.936313045 | 0.805450603 |
| LOC642624 | -0.006852629 | 5.943245546 | 0.805485223 |
| LOC390531 | 0.007389373  | 5.981324408 | 0.805619916 |
| APOF      | 0.006036827  | 5.992300317 | 0.805667545 |
| LRRIQ1    | 0.006279729  | 5.916148779 | 0.805808308 |
| LOC647621 | 0.005448883  | 6.097147319 | 0.805889981 |
| MYO7B     | 0.006349621  | 5.9649459   | 0.806003745 |
| KLK4      | 0.00613159   | 6.026496437 | 0.806013257 |
| ODF4      | 0.006703991  | 6.149656557 | 0.806023858 |
| DCBLD2    | -0.020515212 | 9.973692357 | 0.806112389 |
| LOC653605 | -0.006450903 | 6.020665536 | 0.80616176  |
| LOC642688 | -0.006281075 | 6.037890429 | 0.806195299 |
| NXT2      | -0.009852227 | 6.422512963 | 0.806249552 |
| C10ORF81  | -0.005548535 | 6.097094677 | 0.806279174 |
| TREML3    | 0.003950298  | 6.026838374 | 0.806520051 |
| LOC650538 | 0.007267182  | 6.20412506  | 0.806635104 |
| HHIPL1    | 0.006137703  | 6.098734412 | 0.806714534 |
| LOC647589 | -0.006319104 | 6.232260656 | 0.806789979 |
| RNF181    | 0.012634635  | 10.27805935 | 0.806897561 |
| LOC645200 | -0.005343212 | 6.018812302 | 0.806973296 |
| TRIM11    | 0.011899749  | 6.529791162 | 0.807374173 |
| DLL4      | 0.008078247  | 6.3459519   | 0.807386525 |
| TAKR      | -0.004146553 | 5.979230107 | 0.807449246 |
| KLRC1     | 0.003870433  | 6.009961166 | 0.807503431 |
| LOC644569 | -0.006120383 | 5.870269532 | 0.807534955 |
| LOC645320 | 0.004529617  | 6.039383899 | 0.807723835 |
| FGF10     | -0.005998367 | 6.006483634 | 0.807759705 |
| ZNF124    | 0.004910959  | 6.097144098 | 0.807765501 |
| LOC134541 | -0.005977597 | 6.044337176 | 0.807834952 |
| TPH1      | -0.007343491 | 6.259781276 | 0.807902083 |
| MGC52498  | -0.005975593 | 6.263596462 | 0.807966369 |
| RETNLB    | 0.007081278  | 6.177630069 | 0.808013858 |
| LOC440277 | -0.006316855 | 5.988352002 | 0.808057587 |
| LOC648748 | 0.007625168  | 6.180269339 | 0.808089725 |
| MGC42630  | -0.009599374 | 6.922408309 | 0.80820953  |
| ZP1       | -0.00641281  | 6.156542365 | 0.808293019 |
| RFNG      | -0.007960669 | 7.464111012 | 0.808304008 |
| RBM35B    | 0.006529444  | 6.05811397  | 0.808328106 |
| ZNF516    | 0.006251361  | 6.21899133  | 0.808351754 |
| SPANXN3   | -0.005613518 | 5.907500026 | 0.808400219 |
| LOC653110 | -0.005283993 | 5.980179121 | 0.808430211 |
| LOC651079 | -0.005817214 | 6.010186579 | 0.808510451 |
| BAHD1     | 0.010903176  | 6.051788283 | 0.808598701 |

## DEG.infomation

|           |              |             |             |
|-----------|--------------|-------------|-------------|
| LOC440888 | 0.006061506  | 6.119353805 | 0.808614496 |
| MUC13     | -0.007788219 | 5.983576205 | 0.808618815 |
| LOC136242 | 0.005203408  | 6.054800207 | 0.808669114 |
| MGC39581  | 0.005339493  | 6.019315605 | 0.808683847 |
| NOX1      | 0.003678695  | 6.123722853 | 0.808763728 |
| CFC1B     | 0.006930829  | 6.357999572 | 0.808782013 |
| TMEM211   | -0.006608115 | 6.01972685  | 0.808816625 |
| LOC648846 | 0.006212517  | 6.188862163 | 0.808840726 |
| GPR148    | 0.006152943  | 6.065682672 | 0.808930012 |
| LOC648976 | 0.005505215  | 6.0772508   | 0.809042556 |
| LOC649926 | 0.007049967  | 6.243509698 | 0.809245473 |
| ARNT      | 0.011899676  | 6.378329168 | 0.809255124 |
| LOC390507 | 0.005557459  | 6.078136434 | 0.809271808 |
| SIX1      | -0.005895385 | 5.989490269 | 0.80930396  |
| LOC645790 | -0.006022289 | 6.096367229 | 0.809304439 |
| FARP2     | 0.007276982  | 6.779957382 | 0.809319346 |
| LINCR     | -0.005880482 | 6.116582177 | 0.809369545 |
| LOC642237 | 0.005360038  | 5.983866334 | 0.809446956 |
| LOC642846 | -0.005442704 | 6.029722853 | 0.809603128 |
| LOC649436 | -0.005942386 | 6.051670888 | 0.809624612 |
| NDRG1     | -0.01548039  | 8.948184949 | 0.809729063 |
| C16ORF61  | -0.011320713 | 11.93960333 | 0.809806784 |
| ADAMTS18  | 0.005102322  | 6.090231266 | 0.809814879 |
| DLGAP2    | 0.008103469  | 6.639739931 | 0.8098297   |
| P2RX2     | -0.003006402 | 6.102888762 | 0.810186509 |
| ELOVL7    | -0.005683199 | 5.998160275 | 0.810189453 |
| PRPF39    | 0.005788485  | 6.34425472  | 0.810226298 |
| TMEM174   | 0.0086799    | 6.060220001 | 0.810422296 |
| LSMD1     | -0.01053554  | 8.899774141 | 0.810444901 |
| LOC648905 | -0.005514943 | 6.024521977 | 0.810468476 |
| KCNA6     | -0.008108321 | 6.049489327 | 0.810519504 |
| LOC654200 | 0.006940463  | 5.918791759 | 0.810628601 |
| YWHAE     | -0.014787977 | 7.439215637 | 0.810693302 |
| LOC652367 | -0.006170929 | 6.177208903 | 0.810786886 |
| ZNF180    | 0.005771607  | 5.943762203 | 0.8108204   |
| CCDC76    | 0.008019763  | 7.147699106 | 0.81083482  |
| ANKRD17   | 0.007063147  | 7.597226758 | 0.81083956  |
| VPS26A    | 0.010886737  | 9.886219052 | 0.810852143 |
| LOC647174 | 0.007176314  | 6.115056999 | 0.810883637 |
| VISA      | -0.008521498 | 6.407761668 | 0.810920958 |
| LOC647827 | 0.006183128  | 6.39877334  | 0.810944818 |
| NODAL     | 0.005875395  | 6.203548878 | 0.81098689  |
| MGC3196   | -0.009670505 | 7.628217513 | 0.811114508 |
| ALG10B    | -0.004924239 | 6.182383883 | 0.811128983 |
| LOC651158 | 0.006753848  | 5.956895898 | 0.811180338 |
| KIF2C     | 0.008022746  | 6.298423197 | 0.811186226 |
| FOXG1     | 0.009236326  | 5.952309544 | 0.811374337 |
| DTNB      | 0.006174202  | 6.288261498 | 0.811414596 |
| ST8SIA3   | -0.004561139 | 6.224955006 | 0.811458771 |
| LOC729025 | -0.006306187 | 6.060882989 | 0.811473861 |
| PITPNM3   | 0.006486023  | 5.923013955 | 0.811605899 |



## DEG.infomation

|           |              |             |             |
|-----------|--------------|-------------|-------------|
| SDAD1     | -0.01070817  | 9.091640671 | 0.811713707 |
| ALB       | 0.004042235  | 6.059619123 | 0.811787083 |
| RGS8      | 0.007198324  | 5.965985013 | 0.811861247 |
| LOC650427 | 0.005366961  | 6.120394438 | 0.811870378 |
| CCDC142   | -0.006498394 | 6.045983107 | 0.811891656 |
| CXORF59   | -0.008394313 | 5.97284702  | 0.812042433 |
| LOC651763 | 0.006718458  | 6.219969888 | 0.812126421 |
| LOC653751 | 0.008863365  | 6.174137262 | 0.812216341 |
| LOC652234 | 0.005473011  | 6.028910684 | 0.812259918 |
| MYO15A    | -0.007745092 | 5.954864219 | 0.812331231 |
| PNOC      | -0.006746566 | 5.949384571 | 0.812401394 |
| CIB2      | 0.011725889  | 6.750964832 | 0.812412773 |
| ITGA6     | 0.012413804  | 6.781328886 | 0.812441873 |
| LOC642693 | 0.006239475  | 6.020314762 | 0.812524005 |
| LOC643140 | -0.007619334 | 5.909359135 | 0.812537133 |
| LOC85390  | 0.007595758  | 6.261484717 | 0.812594112 |
| LOC643359 | -0.00564575  | 5.995462078 | 0.812755308 |
| RAB11B    | 0.008220753  | 6.728646203 | 0.812777326 |
| LOC652525 | -0.006062085 | 6.295558657 | 0.812794751 |
| NEK10     | -0.004531123 | 6.242579283 | 0.812829286 |
| C1ORF226  | -0.004174044 | 6.081403191 | 0.812866035 |
| MTAP      | -0.010497381 | 7.765890975 | 0.812936394 |
| LOC650874 | -0.006198465 | 6.119842025 | 0.813053262 |
| CD160     | -0.009868896 | 6.800805957 | 0.81308041  |
| PNPLA1    | -0.004265372 | 6.01721249  | 0.813105088 |
| LOC642895 | -0.00536931  | 6.14590248  | 0.813168386 |
| CCDC126   | 0.009218536  | 6.757560433 | 0.813183528 |
| KRTAP19-6 | -0.006766628 | 6.579857497 | 0.813211218 |
| LOC652048 | 0.006361209  | 6.191393385 | 0.813218201 |
| SPRED2    | -0.010497283 | 7.909500577 | 0.813252843 |
| WNT1      | -0.006502423 | 6.015402057 | 0.813277979 |
| MORF4L1   | -0.014220766 | 10.01855426 | 0.81336229  |
| KCNC2     | -0.004011888 | 6.016827204 | 0.813472765 |
| MBTPS1    | -0.008533137 | 8.928753658 | 0.813534925 |
| SIX4      | 0.008618891  | 6.667466168 | 0.813544016 |
| PNMA3     | -0.017916044 | 7.027503396 | 0.813593775 |
| LOC645043 | 0.005283992  | 6.05597837  | 0.813718941 |
| LOC648758 | 0.005109831  | 6.12533446  | 0.81372919  |
| TFDP3     | -0.00623106  | 6.071105123 | 0.813807766 |
| ABCB1     | 0.008136177  | 6.494097689 | 0.813997367 |
| SPAG17    | -0.005287405 | 5.986989348 | 0.814031004 |
| GIMAP4    | 0.013879433  | 9.640597701 | 0.814080192 |
| ZNF192    | -0.004887032 | 6.170006325 | 0.814096206 |
| LOC642538 | 0.005681264  | 6.08328326  | 0.814124708 |
| ZNF584    | -0.005869254 | 6.446716627 | 0.814167209 |
| LRRC17    | -0.017631641 | 6.941287048 | 0.814184711 |
| LOC644899 | 0.005709365  | 6.161376171 | 0.814269859 |
| LOC387931 | -0.005241759 | 6.014873814 | 0.814340452 |
| MAGEL2    | 0.00911941   | 7.327594116 | 0.814447578 |
| C6ORF134  | 0.003530966  | 6.197798953 | 0.814460308 |
| UXT       | -0.01166331  | 9.623273671 | 0.814468601 |

## DEG.infomation

|           |              |             |             |
|-----------|--------------|-------------|-------------|
| LOC651362 | 0.005099283  | 5.958951843 | 0.814529898 |
| TARBP2    | 0.006874347  | 7.431713342 | 0.814563394 |
| SLC22A11  | -0.006024297 | 6.094860318 | 0.814583328 |
| TMPRSS11E | -0.005924597 | 5.962653928 | 0.814600473 |
| RGPD1     | -0.007723962 | 6.215802103 | 0.814685511 |
| LOC641945 | 0.005013543  | 6.057669878 | 0.814935293 |
| ZDHHC11B  | -0.005585477 | 6.03543024  | 0.814984148 |
| NPNT      | 0.012881335  | 6.225671731 | 0.814985148 |
| PRRX2     | 0.014228212  | 6.768149681 | 0.815030489 |
| SNORD28   | 0.005058092  | 5.902785436 | 0.815176484 |
| RABIF     | 0.004362707  | 6.291265207 | 0.815404755 |
| LOC648408 | 0.005087922  | 6.156415324 | 0.815521662 |
| LOC651296 | -0.009448095 | 6.168048399 | 0.815630019 |
| IGSF11    | 0.005013667  | 6.411388156 | 0.815667205 |
| ZNF131    | 0.009029298  | 6.061298666 | 0.815727804 |
| ATP4B     | 0.003651451  | 6.092836023 | 0.815752455 |
| LIMD2     | -0.005876606 | 6.052884329 | 0.816005723 |
| LOC642648 | -0.005559688 | 6.23758305  | 0.816058078 |
| ERN2      | 0.0061554    | 6.150937761 | 0.816090735 |
| ACTRT1    | 0.021255076  | 7.151436558 | 0.816203458 |
| C12ORF66  | 0.00813504   | 6.448131822 | 0.816244336 |
| MARCH9    | -0.006796264 | 6.221813357 | 0.816289965 |
| MTFMT     | -0.007307121 | 7.387730971 | 0.816338359 |
| LOC730145 | -0.005631456 | 6.012214512 | 0.816434647 |
| ZNF354A   | 0.011377826  | 6.375567082 | 0.816578926 |
| LOC647370 | 0.007966163  | 6.012479733 | 0.816769853 |
| PSMD5     | -0.007670823 | 7.293725145 | 0.816772352 |
| LOC441086 | -0.005951809 | 6.13107724  | 0.816814621 |
| CTNBL1    | 0.017116414  | 8.56603359  | 0.816818616 |
| LOC651581 | -0.005537572 | 6.145641893 | 0.816842884 |
| FCGR3A    | 0.004707574  | 6.199340902 | 0.816853295 |
| ZNF239    | -0.007934621 | 6.823506542 | 0.816881297 |
| OFCC1     | -0.005535353 | 6.037493367 | 0.816984962 |
| KLC2      | 0.005281004  | 6.33053738  | 0.817007126 |
| CHP       | -0.017516175 | 8.876386832 | 0.817012065 |
| N6AMT2    | -0.011085051 | 7.686209853 | 0.817096078 |
| TRIM10    | 0.003335092  | 6.009363189 | 0.817228777 |
| PLP1      | -0.00672788  | 6.384814057 | 0.817377568 |
| OR4D6     | -0.006008813 | 6.166458492 | 0.817461279 |
| LOC200726 | 0.009742038  | 6.452651922 | 0.817532211 |
| GDNF      | -0.005714705 | 5.993858224 | 0.817549027 |
| NDUFB8    | 0.007979285  | 13.30943937 | 0.81755428  |
| LOC650217 | -0.006583869 | 6.058856047 | 0.81756213  |
| BCAP29    | 0.009389953  | 7.911125061 | 0.817609835 |
| LCE1F     | -0.006034945 | 6.053770727 | 0.8176935   |
| GBF1      | 0.012983369  | 7.647332702 | 0.817726124 |
| OR2T1     | -0.008476919 | 6.073996337 | 0.81775068  |
| LOC643479 | 0.006494863  | 6.063088968 | 0.817810798 |
| LOC653808 | 0.005105257  | 6.223604139 | 0.817901713 |
| BICC1     | -0.004998488 | 6.048297812 | 0.817917661 |
| FANCF     | 0.005894756  | 6.230482119 | 0.817970181 |

## DEG.infomation

|           |              |             |             |
|-----------|--------------|-------------|-------------|
| KLK12     | -0.004335036 | 5.997745602 | 0.818090245 |
| LOC649676 | -0.00597561  | 5.991734145 | 0.818187374 |
| UNQ5830   | -0.00546218  | 6.040978612 | 0.818430605 |
| LOC648603 | 0.005673433  | 6.046033554 | 0.818435464 |
| ITGB1BP2  | 0.015535213  | 7.711127883 | 0.81866198  |
| LOC651287 | 0.005702998  | 6.125493738 | 0.818753003 |
| LOC654114 | 0.00978699   | 5.947150172 | 0.818795539 |
| LOC650010 | -0.005875748 | 6.175395228 | 0.818840424 |
| LOC650005 | 0.00960857   | 5.976538959 | 0.818849114 |
| DDX27     | 0.013924303  | 7.374245779 | 0.818850833 |
| NARG1L    | -0.005560487 | 6.548542796 | 0.81891417  |
| LOC647541 | 0.006562932  | 6.212284463 | 0.818922626 |
| RLBP1L1   | -0.005591805 | 5.972084432 | 0.818955475 |
| LOC643246 | 0.008315779  | 6.030022494 | 0.819069349 |
| MGC10646  | 0.005193786  | 6.083117652 | 0.81909853  |
| MAGEB1    | 0.004131516  | 5.971363061 | 0.819103051 |
| LOC646607 | 0.004676556  | 6.14498854  | 0.81924661  |
| LOC649946 | 0.023036409  | 8.783055072 | 0.819286717 |
| FSTL5     | 0.004966399  | 5.88414466  | 0.81940963  |
| LOC645580 | 0.005859444  | 6.036047479 | 0.819430342 |
| LGR6      | -0.004848887 | 5.983692656 | 0.819442193 |
| TRIM48    | 0.006247178  | 6.026929055 | 0.819485943 |
| RELN      | -0.012460678 | 6.358232112 | 0.819581248 |
| SLC7A11   | -0.00692961  | 5.967070422 | 0.819583923 |
| GRM5      | 0.009007161  | 6.07292773  | 0.819625375 |
| LOC654116 | -0.006407498 | 6.103998949 | 0.819655344 |
| FLJ31132  | -0.00563422  | 6.114218723 | 0.819693464 |
| C8G       | -0.007251399 | 6.338742222 | 0.819794519 |
| LOC401056 | 0.007096697  | 6.284509945 | 0.819956783 |
| DRG1      | 0.010756356  | 9.773853389 | 0.820050835 |
| LOC642616 | -0.005056816 | 6.116115935 | 0.8201995   |
| LOC644578 | 0.005213084  | 6.129037939 | 0.820224391 |
| CCDC62    | -0.004464375 | 6.221866178 | 0.820241309 |
| LYRM1     | 0.010088104  | 10.3562918  | 0.820247933 |
| MGC119295 | -0.009897446 | 6.021380939 | 0.820272883 |
| LOC647723 | -0.005762483 | 5.996637577 | 0.820351975 |
| KRTAP22-1 | -0.006012046 | 5.972562791 | 0.820485481 |
| DDAH2     | 0.015938593  | 6.900247404 | 0.820565099 |
| DEFB106A  | -0.005545557 | 5.906898776 | 0.820648631 |
| LOC402110 | 0.005783633  | 6.130113836 | 0.820764106 |
| LOC152667 | -0.003917041 | 5.952476027 | 0.820875262 |
| C1ORF192  | 0.00699404   | 6.111640309 | 0.820876066 |
| LOC644826 | 0.00527218   | 6.033302527 | 0.82106255  |
| JPH2      | 0.009521208  | 7.705726881 | 0.821271481 |
| PVALB     | -0.005843564 | 5.962202461 | 0.82141114  |
| TSPAN1    | 0.007216143  | 6.491547464 | 0.821422829 |
| TMEM1     | 0.005116473  | 6.654090009 | 0.821450633 |
| LOC653080 | -0.007334456 | 6.508383274 | 0.821480418 |
| CCL4L1    | -0.009597034 | 6.173390946 | 0.821511513 |
| LIM2      | -0.005738313 | 5.900901665 | 0.821527588 |
| LOC642856 | 0.006130125  | 6.027829823 | 0.82162073  |

## DEG.infomation

|           |              |             |             |
|-----------|--------------|-------------|-------------|
| OR2T2     | 0.004629154  | 6.240702386 | 0.821751426 |
| LOC441066 | -0.010727941 | 6.085133827 | 0.821947787 |
| LOC648533 | -0.005779687 | 5.934413072 | 0.82198939  |
| POU3F1    | 0.005056777  | 6.023032411 | 0.822176535 |
| C17ORF54  | -0.005515295 | 6.156112506 | 0.822265631 |
| EMG1      | 0.010878227  | 9.108448596 | 0.82266009  |
| IPO9      | 0.005518978  | 7.50052788  | 0.822662766 |
| LOC644853 | 0.0061832    | 6.063239823 | 0.822687301 |
| LIMD1     | -0.005729145 | 5.987337239 | 0.822719093 |
| KIAA1409  | -0.004569666 | 6.110468808 | 0.822854935 |
| LOC647281 | 0.004912686  | 6.068951574 | 0.822875387 |
| LOC650810 | -0.005373052 | 6.100313407 | 0.822909276 |
| AATK      | 0.003921452  | 6.200842052 | 0.823048257 |
| MYO5C     | -0.013549978 | 7.068215032 | 0.823062397 |
| GEMIN5    | 0.007098295  | 6.928332911 | 0.823207942 |
| FLI1      | 0.009946777  | 6.293974977 | 0.823219675 |
| LOC649921 | 0.005204751  | 6.012972287 | 0.823260828 |
| OR10A7    | 0.005484183  | 6.053789524 | 0.823289603 |
| ZNF792    | -0.008185863 | 6.850352678 | 0.823414882 |
| LOC652379 | 0.005980908  | 6.072665031 | 0.823421884 |
| DLEU2L    | 0.005758198  | 6.07230619  | 0.823454177 |
| LOC647439 | 0.008385579  | 6.079052295 | 0.823481306 |
| PTPN5     | -0.007797272 | 6.081399087 | 0.823485778 |
| ZNF343    | 0.009459497  | 6.082029759 | 0.823863049 |
| CASC5     | -0.004072542 | 6.038265483 | 0.823900818 |
| LOC643451 | 0.005334801  | 6.207947882 | 0.824021692 |
| STAR      | -0.003815554 | 6.146455445 | 0.824046488 |
| LOC644480 | 0.004712766  | 6.010022945 | 0.82424081  |
| LOC649773 | -0.005643194 | 6.062599553 | 0.824269644 |
| FILIP1    | 0.012987506  | 8.644887622 | 0.824282835 |
| DNAH11    | -0.005247779 | 5.910418633 | 0.824307705 |
| MYST2     | 0.006903494  | 6.704289693 | 0.82437109  |
| A26C1B    | -0.00517609  | 6.145106783 | 0.824461599 |
| OR2T35    | 0.004115086  | 6.024271901 | 0.824495954 |
| LOC441799 | -0.005174805 | 6.05688805  | 0.824508883 |
| DDX20     | -0.007784218 | 6.549918308 | 0.824510497 |
| TRAPPC1   | -0.009686008 | 9.353927699 | 0.824521244 |
| LOC645133 | -0.006215002 | 6.232465625 | 0.824575449 |
| CALML4    | -0.008369898 | 7.796281571 | 0.82461689  |
| SLC6A14   | 0.005273505  | 5.958515216 | 0.824627634 |
| C15ORF28  | 0.0080853    | 6.509072852 | 0.824654272 |
| MRPL33    | -0.011691425 | 12.16693845 | 0.824655844 |
| TMEM151   | -0.008678384 | 5.949695619 | 0.824771282 |
| ZSCAN2    | -0.00398873  | 6.622484425 | 0.824772488 |
| C11ORF47  | 0.003621245  | 6.139483433 | 0.82477796  |
| SKAP1     | -0.005146456 | 6.156956667 | 0.825184097 |
| RGPD2     | 0.008235974  | 6.289831235 | 0.82519082  |
| LOC643186 | 0.005913782  | 6.016559633 | 0.825252022 |
| LOC642166 | -0.006747597 | 5.915763403 | 0.825288473 |
| ANKS4B    | 0.00572027   | 6.051665323 | 0.825343117 |
| MRPL27    | -0.010096333 | 8.210551776 | 0.825400111 |

## DEG.infomation

|           |              |             |             |
|-----------|--------------|-------------|-------------|
| SPANXC    | -0.005625356 | 5.890277903 | 0.825653678 |
| LOC642032 | -0.005411869 | 6.045830065 | 0.825668578 |
| LOC649112 | 0.006844987  | 6.090589664 | 0.825681549 |
| LOC641987 | -0.005760211 | 6.274026675 | 0.825806674 |
| FLJ46010  | -0.005769813 | 6.025070444 | 0.825905662 |
| SLC43A2   | -0.010434442 | 6.876226425 | 0.825931024 |
| USP30     | -0.005769344 | 6.566521153 | 0.825942598 |
| ZNF710    | -0.004886395 | 5.905570571 | 0.825987074 |
| LOC646779 | -0.004919494 | 5.969187214 | 0.826029485 |
| CACNG1    | 0.00631642   | 5.989920379 | 0.826236236 |
| OSTALPHA  | -0.006293952 | 6.038174215 | 0.826243699 |
| NDOR1     | 0.008322229  | 5.976676435 | 0.826320241 |
| MRE11A    | 0.006279146  | 6.908764821 | 0.826524168 |
| B3GNT4    | 0.007941321  | 5.987289487 | 0.826524248 |
| CYP2C18   | -0.005127548 | 6.064967397 | 0.826555479 |
| WDR44     | -0.006492722 | 6.73546825  | 0.826622319 |
| LOC644897 | 0.005169877  | 6.009945874 | 0.826727291 |
| LOC653520 | -0.005126917 | 6.258731018 | 0.826751705 |
| LOC652368 | 0.005167636  | 6.028697369 | 0.826908952 |
| FRG1      | 0.015195259  | 9.102248733 | 0.826992494 |
| LOC642017 | -0.007119717 | 7.073932766 | 0.827069169 |
| FAM66E    | -0.00551559  | 6.060945905 | 0.827094577 |
| PLB1      | -0.005788247 | 6.23164644  | 0.827131115 |
| LOC642701 | 0.006488958  | 6.027586947 | 0.827171602 |
| LOC727752 | -0.006107975 | 6.051017971 | 0.827179798 |
| KLHL5     | 0.009928124  | 7.707526234 | 0.827304743 |
| TMEM83    | 0.0067853    | 6.335972598 | 0.827351423 |
| LOC646396 | 0.005551159  | 6.125096141 | 0.827372859 |
| FLJ22795  | -0.011369308 | 7.415967998 | 0.827430253 |
| LOC646799 | -0.005126672 | 5.914764368 | 0.827440392 |
| GCKR      | 0.005110821  | 6.183494593 | 0.827441159 |
| LOC728493 | -0.005532657 | 5.959321923 | 0.827471458 |
| LOC649993 | 0.006086708  | 6.253532683 | 0.827537293 |
| DMXL2     | 0.00672901   | 6.40184052  | 0.827720006 |
| LOC651589 | -0.005095202 | 6.034159993 | 0.827731613 |
| LOC644117 | 0.006044799  | 6.452753036 | 0.827778448 |
| LOC340900 | -0.005361371 | 6.029228811 | 0.827845714 |
| LOC642843 | 0.008318741  | 5.994131583 | 0.828016759 |
| LOC642204 | -0.006160549 | 5.964619584 | 0.828254697 |
| C19ORF20  | 0.005295246  | 6.263154169 | 0.82825689  |
| IFITM4P   | -0.004461665 | 6.175701236 | 0.828304637 |
| MAP3K13   | -0.00544412  | 6.224026959 | 0.828561899 |
| UQCRFS1   | 0.010354649  | 13.45215026 | 0.828680887 |
| LOC727992 | 0.004866707  | 5.976122526 | 0.828751359 |
| LOC339862 | 0.004849038  | 6.106404653 | 0.828761695 |
| CSMD2     | 0.009668789  | 6.120518372 | 0.828822061 |
| LOC650154 | -0.005055512 | 5.939943584 | 0.828891968 |
| C15ORF42  | -0.005269326 | 6.022260408 | 0.829012058 |
| LOC653765 | -0.005406114 | 6.459256376 | 0.829171135 |
| LOC654164 | -0.005409669 | 6.127487879 | 0.829608938 |
| PHKG1     | 0.018092081  | 6.9674049   | 0.829676976 |

## DEG.infomation

|           |              |             |             |
|-----------|--------------|-------------|-------------|
| TMEM9B    | 0.007004351  | 10.2045366  | 0.829791946 |
| REG1A     | 0.00492478   | 5.994056894 | 0.829815769 |
| LOC650943 | 0.005249643  | 6.217659919 | 0.829989668 |
| ATP5G2    | -0.015495424 | 10.36735897 | 0.830017854 |
| CPB2      | -0.003286578 | 5.987279053 | 0.830017867 |
| UVRAG     | -0.007224839 | 6.690215646 | 0.830162215 |
| OR6B3     | 0.005960288  | 6.162031242 | 0.830174896 |
| LOC729266 | 0.005434237  | 6.023290844 | 0.830312598 |
| BDH1      | 0.010675362  | 6.903073451 | 0.830392583 |
| HNRNPL    | 0.011619974  | 8.67287786  | 0.830449517 |
| LOC728226 | -0.003915058 | 6.16732465  | 0.830453561 |
| MCM3AP    | -0.007888136 | 8.914639192 | 0.830548647 |
| LOC652800 | 0.005359668  | 6.124893634 | 0.830667894 |
| LOC728956 | -0.00521199  | 6.067023415 | 0.830770742 |
| ERAS      | 0.005613369  | 6.041920172 | 0.830782523 |
| FETUB     | -0.005794101 | 6.121104804 | 0.830812348 |
| OR5C1     | -0.00518215  | 6.175197181 | 0.830829883 |
| LOC648469 | 0.006199275  | 5.928661986 | 0.830894289 |
| LOC339789 | -0.006082452 | 5.926166628 | 0.831029264 |
| PITX2     | -0.002920215 | 6.121974193 | 0.831065197 |
| TTLL8     | 0.006125381  | 6.050445738 | 0.831137026 |
| GGTLC2    | -0.006226875 | 5.90081801  | 0.831139617 |
| KIF3B     | 0.007656871  | 7.333181101 | 0.831140598 |
| LOC646892 | -0.003966633 | 6.023249353 | 0.83114942  |
| LOC649238 | 0.00557033   | 6.1393784   | 0.831342072 |
| KRT6C     | 0.004886241  | 6.017513373 | 0.831450677 |
| ORM1      | 0.005190516  | 6.044381303 | 0.831630588 |
| MRGPRD    | 0.006322091  | 6.110591478 | 0.831868325 |
| CPO       | 0.006508576  | 5.978315894 | 0.831878053 |
| LOC652472 | 0.00492111   | 5.978060783 | 0.832142858 |
| LOC648132 | -0.005298148 | 6.049035333 | 0.832144233 |
| LOC729218 | -0.005292878 | 5.987918568 | 0.832159177 |
| PASK      | -0.004180232 | 6.155293002 | 0.832192694 |
| LAMB1     | 0.012409752  | 8.322750296 | 0.832276162 |
| LOC731227 | -0.005069399 | 6.22591903  | 0.83236886  |
| LOC440836 | 0.004796     | 6.105522748 | 0.832376444 |
| C8B       | -0.005783469 | 5.957592701 | 0.832376608 |
| LOC652185 | -0.005063417 | 6.106733173 | 0.832415678 |
| GPR152    | 0.004810786  | 5.985582337 | 0.832542725 |
| FANCA     | -0.003373139 | 6.13142445  | 0.832660147 |
| CSH2      | -0.003869461 | 6.074532184 | 0.832733453 |
| LOC652652 | -0.005145488 | 6.086323196 | 0.832763516 |
| C15ORF55  | -0.005351802 | 6.077180771 | 0.832779862 |
| LOC338805 | 0.005236892  | 5.918295794 | 0.832815136 |
| CHRNA9    | -0.003982793 | 6.077091025 | 0.832816268 |
| MEIS3     | -0.004767985 | 6.273002293 | 0.832820929 |
| ELA2A     | 0.005628306  | 5.938328587 | 0.83282477  |
| LOC730546 | 0.005016597  | 6.121867668 | 0.832920564 |
| LOC643664 | 0.008628043  | 5.904038121 | 0.832929983 |
| TSHR      | -0.002703037 | 6.017078507 | 0.832939214 |
| SLC45A2   | 0.004062037  | 6.034324622 | 0.832951324 |

## DEG.infomation

|              |              |             |             |
|--------------|--------------|-------------|-------------|
| LOC647448    | 0.00626447   | 5.956155682 | 0.832953015 |
| PACAP        | -0.006104367 | 6.167142063 | 0.833054492 |
| RNFT1        | -0.008029895 | 6.842921904 | 0.833059139 |
| ZNRF4        | -0.005236023 | 5.959513427 | 0.833105639 |
| OR52B2       | 0.005415549  | 6.018828202 | 0.833177059 |
| PCDHA10      | -0.004001777 | 5.949013577 | 0.833263523 |
| CCNL2        | 0.005306189  | 6.383036448 | 0.83328757  |
| SLC25A29     | 0.006765477  | 6.785257697 | 0.833287747 |
| SERPINA7     | -0.005908622 | 6.031431196 | 0.833348491 |
| FOXE3        | -0.004302526 | 6.074177395 | 0.833438612 |
| UBXD7        | -0.007454304 | 6.145420864 | 0.833497272 |
| GPR155       | -0.003680417 | 6.037664509 | 0.833716638 |
| LOC442015    | 0.005685977  | 6.105844778 | 0.833968596 |
| OR11A1       | -0.003691233 | 6.095307261 | 0.833979534 |
| ABCA3        | -0.010905009 | 7.09751013  | 0.834057058 |
| HDAC6        | -0.007276752 | 7.332617613 | 0.834241612 |
| LOC653496    | 0.006627228  | 6.779082738 | 0.83428178  |
| SFTPD        | 0.010045695  | 6.466931092 | 0.834332622 |
| LRGUK        | -0.005079409 | 6.074069233 | 0.834386052 |
| LOC100101266 | -0.003489733 | 6.054798777 | 0.834520655 |
| LOC731431    | 0.004785007  | 6.085618314 | 0.834543103 |
| SEMA4F       | -0.00570092  | 6.927618967 | 0.834595847 |
| LOC650346    | 0.005444319  | 6.213661741 | 0.83466185  |
| BDKRB1       | -0.005971263 | 6.24008519  | 0.834716831 |
| LOC283824    | -0.003562321 | 6.034853002 | 0.834801776 |
| KLKBL4       | 0.005143842  | 5.932879837 | 0.834996186 |
| LMX1B        | 0.006010897  | 6.122188076 | 0.835024798 |
| LOC652038    | -0.006980702 | 6.124870269 | 0.835076527 |
| LOC222699    | 0.005137722  | 6.084339459 | 0.835108296 |
| LOC650009    | 0.005883535  | 6.069036154 | 0.835249797 |
| SCN11A       | 0.005068365  | 5.972797559 | 0.835449801 |
| TMEM101      | 0.008987217  | 8.530915969 | 0.835510065 |
| WDHD1        | 0.003724458  | 6.29002824  | 0.835606999 |
| LOC643612    | -0.005909782 | 6.314915849 | 0.83561641  |
| OR10H4       | -0.004365393 | 5.992299654 | 0.835768019 |
| MGC42638     | -0.004487256 | 6.009848096 | 0.835845816 |
| ICAM5        | -0.005883035 | 6.00225471  | 0.835890527 |
| LOC648754    | -0.005135096 | 6.069860425 | 0.836010848 |
| LOC647279    | -0.00561751  | 6.003345683 | 0.836046608 |
| FAM55D       | -0.002974567 | 5.967042504 | 0.836130639 |
| NAPSA        | 0.005723681  | 6.081980241 | 0.836144807 |
| LOC647719    | -0.004460743 | 6.011819336 | 0.836198315 |
| DHX16        | 0.007497721  | 8.869420529 | 0.836225988 |
| ULBP1        | 0.005431291  | 6.164558762 | 0.836479044 |
| OTUD6A       | -0.005680259 | 6.128584699 | 0.836491449 |
| CACNB2       | -0.014958934 | 7.295920611 | 0.836530207 |
| C1QL3        | -0.003851821 | 6.140546482 | 0.836555349 |
| GALNT8       | 0.005290178  | 6.175875623 | 0.836608709 |
| CTF8         | -0.003784523 | 6.162296978 | 0.836702285 |
| WFIKKN2      | 0.005358599  | 5.941853896 | 0.836801143 |
| SIPA1L3      | 0.012059282  | 7.198890919 | 0.836816099 |

## DEG.infomation

|           |              |             |             |
|-----------|--------------|-------------|-------------|
| GRM4      | -0.005466372 | 6.210241481 | 0.836908373 |
| SNX32     | -0.006379561 | 6.236086778 | 0.837079709 |
| COX6B2    | -0.003841836 | 6.077478413 | 0.837151501 |
| LOC646047 | -0.004919521 | 6.238324528 | 0.837285002 |
| SPAG4L    | 0.005463882  | 6.319272199 | 0.837343202 |
| LOC653878 | -0.00852469  | 6.153682439 | 0.837415027 |
| LOC729569 | -0.00568888  | 6.005991039 | 0.837634851 |
| LOC400891 | 0.005596852  | 6.043401681 | 0.837667848 |
| LOC648548 | 0.005073989  | 6.153156991 | 0.837766504 |
| OR6K6     | -0.005708255 | 5.93110674  | 0.837793818 |
| HNRNPA3P1 | -0.011280254 | 6.327059181 | 0.837802377 |
| LOC650883 | -0.005893184 | 5.968862584 | 0.837835072 |
| CPA4      | 0.005492858  | 5.997904838 | 0.837851229 |
| TMPRSS5   | 0.005001829  | 6.021740676 | 0.837895876 |
| LOC402145 | 0.005352872  | 5.984157907 | 0.837962792 |
| HSP90AB4P | 0.00489983   | 6.025107868 | 0.838118186 |
| MARK2     | -0.006774335 | 6.496932923 | 0.838219577 |
| FCGR3B    | -0.006200455 | 6.770587143 | 0.838224474 |
| TMEM203   | -0.006462604 | 9.474465101 | 0.838363979 |
| ACOXL     | -0.005616103 | 5.960970027 | 0.83842559  |
| OR51Q1    | 0.005168873  | 6.202497648 | 0.838494828 |
| VMAC      | 0.006566263  | 6.262656798 | 0.838508072 |
| ZBTB34    | 0.005114512  | 6.835347512 | 0.83862572  |
| YDD19     | -0.004398749 | 6.059407391 | 0.838705412 |
| LOC650014 | 0.004420474  | 5.955611541 | 0.838868084 |
| LOC644335 | -0.005262172 | 6.111689149 | 0.838901574 |
| NRXN1     | -0.003914173 | 6.067924444 | 0.838934999 |
| LOC729164 | 0.005661476  | 6.078064911 | 0.838935598 |
| LOC645253 | -0.006827757 | 6.008712299 | 0.838994    |
| LOC387647 | -0.012778655 | 7.029116832 | 0.839082655 |
| FBXO46    | 0.008533803  | 6.920679943 | 0.8391419   |
| GRSF1     | -0.00891908  | 10.20208551 | 0.839210643 |
| LOC647542 | 0.004580266  | 6.131717265 | 0.839265362 |
| OR5L2     | 0.003652852  | 6.083403419 | 0.839326243 |
| LOC132203 | 0.005228665  | 6.098992761 | 0.839375727 |
| LOC731050 | -0.004844248 | 6.069580206 | 0.83959701  |
| RASSF10   | 0.005178147  | 6.093267236 | 0.839599411 |
| CARTPT    | -0.005786428 | 6.430203532 | 0.83964271  |
| LOC390829 | 0.004990764  | 6.071071729 | 0.839643717 |
| LOC652080 | 0.005185569  | 5.882227151 | 0.839646347 |
| NKX2-2    | 0.005098356  | 6.046374456 | 0.83966108  |
| FGF19     | -0.006200423 | 6.142216445 | 0.839668094 |
| GRLF1     | 0.004260471  | 6.126240661 | 0.839693741 |
| GTF2A1    | -0.004454288 | 6.22469833  | 0.839824566 |
| SEPT3     | 0.00376581   | 6.021656661 | 0.839849479 |
| OR5B2     | 0.004987114  | 6.128168524 | 0.840061739 |
| LOC645994 | 0.004879047  | 6.171838634 | 0.840199032 |
| LOC401629 | 0.005752547  | 6.104605995 | 0.840258795 |
| IFNA16    | -0.00516486  | 6.008572769 | 0.840315463 |
| LOC650681 | 0.006211615  | 6.109555276 | 0.840383156 |
| FLJ33590  | 0.005728202  | 6.192969181 | 0.840424355 |



## DEG.infomation

|           |              |             |             |
|-----------|--------------|-------------|-------------|
| LOC731170 | 0.0062139    | 5.91090727  | 0.840500881 |
| LOC644045 | -0.005653278 | 6.030185265 | 0.840644453 |
| LOC646283 | -0.004594407 | 6.07658851  | 0.840672167 |
| OPRL1     | -0.00438989  | 6.137230286 | 0.840706913 |
| LOC652894 | -0.005285025 | 6.019049057 | 0.840808647 |
| LOC441426 | 0.004358744  | 6.146524399 | 0.840903809 |
| PUS3      | -0.006264731 | 7.103048707 | 0.840942835 |
| LOC648993 | -0.007268863 | 5.99682656  | 0.840993254 |
| OR4F15    | 0.004817794  | 6.017511879 | 0.841026161 |
| AARS2     | 0.010414859  | 8.0217017   | 0.841060702 |
| KIF14     | 0.006137471  | 6.45960815  | 0.841078479 |
| SLCO1B1   | 0.003888238  | 6.094864128 | 0.841120218 |
| LOC647250 | -0.006573056 | 6.021718013 | 0.841157706 |
| SERP2     | 0.013273973  | 8.626893264 | 0.841280294 |
| CRB2      | 0.005238425  | 5.997100532 | 0.841380955 |
| C7ORF30   | -0.009421086 | 11.59937564 | 0.841393906 |
| MRGPRX4   | 0.004906866  | 5.98690394  | 0.841635563 |
| MED18     | -0.005937612 | 6.261374951 | 0.84188708  |
| LOC646376 | -0.00520691  | 6.061601248 | 0.841957924 |
| KLK9      | 0.005317135  | 5.949089449 | 0.842031784 |
| OR6B2     | 0.005477245  | 5.983298015 | 0.842236861 |
| GZMM      | -0.005073974 | 6.044758034 | 0.842338671 |
| LOC651933 | 0.004913448  | 6.060730839 | 0.842369745 |
| COPS5     | 0.008311219  | 11.24229399 | 0.842536664 |
| LOC643328 | 0.004222279  | 5.967429861 | 0.842557962 |
| SFTPA2B   | -0.004243507 | 5.974243877 | 0.842617696 |
| LOC644662 | 0.003740735  | 6.135187902 | 0.842632561 |
| FOXN2     | -0.00943639  | 8.200974963 | 0.842696018 |
| C1ORF69   | -0.006431321 | 6.837911096 | 0.842724878 |
| TTY4C     | 0.004705852  | 6.074892089 | 0.842949491 |
| LOC731827 | -0.004602525 | 6.123488713 | 0.842960049 |
| LOC642611 | -0.004922999 | 6.022204655 | 0.843004572 |
| AGER      | 0.004400716  | 6.050065145 | 0.843040308 |
| ITGB1BP1  | 0.011903203  | 9.004665033 | 0.84312384  |
| NDST3     | 0.004847811  | 6.029961063 | 0.843199338 |
| RND1      | 0.005138415  | 6.114201673 | 0.843226224 |
| LOC645643 | 0.005466895  | 5.964520487 | 0.843272994 |
| LOC402199 | -0.004980716 | 5.967281284 | 0.843355509 |
| RASGRP4   | 0.002742651  | 6.016203453 | 0.843395304 |
| RHCE      | -0.003550189 | 6.117014901 | 0.8434547   |
| LOC150383 | -0.005469657 | 6.039227096 | 0.843770295 |
| RNASEH1   | -0.007235701 | 8.897551633 | 0.843901221 |
| LOC391574 | -0.005054114 | 6.174665053 | 0.844039304 |
| KIAA0415  | -0.006051949 | 6.434113704 | 0.844140403 |
| PIIF      | 0.007676205  | 6.796264463 | 0.844168146 |
| TCTE3     | 0.004923371  | 6.006078981 | 0.844181133 |
| DCLRE1C   | 0.008238408  | 7.565341165 | 0.844264695 |
| LOC646881 | 0.005218031  | 6.272145269 | 0.844341343 |
| PIP5K3    | 0.002945932  | 6.004120237 | 0.844434549 |
| LOC651619 | -0.006593759 | 6.081419014 | 0.844630668 |
| SLC7A5P1  | -0.00355034  | 6.024417137 | 0.844870466 |

## DEG.infomation

|           |              |             |             |
|-----------|--------------|-------------|-------------|
| ASB8      | 0.014649836  | 8.213005727 | 0.844955493 |
| INPP4A    | 0.0036212    | 6.141810817 | 0.84498965  |
| LOC649094 | -0.002856105 | 6.002181489 | 0.845059989 |
| ARHGAP11B | -0.005303924 | 6.128150495 | 0.845104799 |
| LOC653397 | -0.005320838 | 5.93912889  | 0.84510692  |
| LOC653684 | -0.005066581 | 5.949569274 | 0.845190024 |
| LOC645563 | 0.004901353  | 6.231580406 | 0.845246986 |
| IL21R     | 0.002889657  | 6.191495387 | 0.845372761 |
| GDPD1     | -0.007378481 | 6.951973144 | 0.845446428 |
| HIRA      | -0.008144177 | 6.153839627 | 0.845462552 |
| GNRHR2    | 0.006834799  | 6.029479572 | 0.845473565 |
| RBMXL2    | 0.005299127  | 5.957205025 | 0.845487118 |
| LOC648541 | -0.005149652 | 6.104536242 | 0.845559666 |
| SERPINA13 | -0.00520203  | 5.982638338 | 0.845621243 |
| CXORF42   | -0.005461647 | 6.163605325 | 0.845736231 |
| DRD3      | 0.003541412  | 6.087559889 | 0.845738229 |
| LOC653635 | -0.007413338 | 6.827374002 | 0.845771903 |
| LOC732058 | -0.004217707 | 5.965825098 | 0.845851097 |
| LOC283887 | -0.004671422 | 6.151734999 | 0.845860455 |
| AURKB     | -0.005310118 | 6.078358514 | 0.845938402 |
| CD300LB   | 0.0048955    | 6.046685188 | 0.845959841 |
| FLJ33706  | -0.004472688 | 6.087701073 | 0.846008283 |
| LOC646471 | -0.00494253  | 6.052172847 | 0.846079595 |
| LOC652184 | -0.004298477 | 6.080109345 | 0.846176348 |
| DSCR9     | -0.004456566 | 5.994078889 | 0.84628662  |
| SPIC      | 0.003899976  | 6.018173576 | 0.846316908 |
| SPERT     | -0.005764039 | 6.202223682 | 0.846355462 |
| FLJ20209  | 0.005339718  | 6.348957881 | 0.846381785 |
| CCDC80    | 0.007477409  | 6.613044995 | 0.846501341 |
| PCDHA8    | 0.004840274  | 6.086150098 | 0.846524829 |
| LOC653574 | 0.005074192  | 6.061007209 | 0.846723558 |
| FGB       | -0.003658316 | 6.138638834 | 0.846773142 |
| LOC646074 | 0.004781565  | 6.402013113 | 0.84677579  |
| LOC440438 | 0.005032884  | 6.277216865 | 0.846779619 |
| FLJ42957  | -0.004867738 | 6.005065174 | 0.846788374 |
| TRMT2A    | 0.005325361  | 6.164013836 | 0.846852869 |
| LOC653702 | 0.015115292  | 7.355330386 | 0.846941852 |
| LOC652163 | -0.004371323 | 6.022829215 | 0.846950963 |
| GPR156    | 0.006881582  | 6.110128859 | 0.846971626 |
| GRXCR1    | 0.004433188  | 6.012523699 | 0.846994073 |
| VTA1      | 0.006459888  | 7.558827389 | 0.847047198 |
| LOC648620 | 0.005652066  | 6.04242214  | 0.847051058 |
| OVCH1     | 0.006667725  | 5.963279307 | 0.847076668 |
| FUNDC2    | -0.005003194 | 6.651100997 | 0.847091754 |
| CDY1B     | 0.002490962  | 5.999469482 | 0.84720391  |
| SPRR2E    | -0.00350066  | 5.986814613 | 0.847220622 |
| KBTBD2    | -0.012915038 | 9.189607295 | 0.847319558 |
| TMEM184A  | 0.005646544  | 6.166683877 | 0.84733138  |
| LOC646521 | 0.005049424  | 6.332244198 | 0.847410939 |
| SGCZ      | -0.004835093 | 6.059327389 | 0.847473833 |
| ZFATAS    | 0.003840585  | 5.956275518 | 0.847504696 |

## DEG.infomation

|           |              |             |             |
|-----------|--------------|-------------|-------------|
| LOC645694 | 0.004400784  | 5.958363106 | 0.847507705 |
| LOC654220 | 0.004824436  | 6.164896891 | 0.84760626  |
| LOC652300 | -0.004689068 | 6.099684186 | 0.847617573 |
| TAS2R46   | 0.005314782  | 6.013536773 | 0.84767155  |
| RPL23     | -0.015894424 | 11.23164351 | 0.847673006 |
| LY6G6F    | 0.004823927  | 6.086686376 | 0.847679279 |
| TLL2      | -0.003663883 | 6.003106658 | 0.847846384 |
| SPINK5L3  | 0.004838854  | 6.076482193 | 0.847919709 |
| LOC652450 | -0.003586031 | 6.050571442 | 0.848002019 |
| OR9Q2     | 0.005287718  | 5.956152378 | 0.848031526 |
| C13ORF23  | 0.005421892  | 7.188497938 | 0.848032749 |
| LOC653537 | 0.003693084  | 6.083991045 | 0.848063314 |
| MVD       | -0.007206429 | 6.716280006 | 0.848206004 |
| LOC646750 | -0.004806423 | 6.133683328 | 0.848313227 |
| FAM92B    | -0.006818875 | 5.937167077 | 0.848318105 |
| CRCT1     | 0.005427754  | 6.081593624 | 0.848448946 |
| OLAH      | 0.005575725  | 6.2240817   | 0.848458962 |
| LOC653669 | 0.00458479   | 5.924533742 | 0.848538461 |
| LOC388814 | -0.00502952  | 6.168072208 | 0.848581582 |
| LOC390530 | -0.005493224 | 5.956726568 | 0.848590847 |
| LOC642659 | 0.003947889  | 6.056297406 | 0.848624515 |
| C16ORF52  | -0.005214725 | 6.603119335 | 0.848660237 |
| FLJ46020  | -0.004558314 | 6.068595223 | 0.848666886 |
| C9ORF11   | -0.005094282 | 5.988025795 | 0.848667165 |
| NFIC      | -0.008618767 | 7.572640361 | 0.848678963 |
| C1ORF138  | 0.004578848  | 6.0114654   | 0.848743955 |
| BCKDHB    | 0.008601869  | 7.258736438 | 0.848850174 |
| LOC645915 | 0.005066702  | 6.029986116 | 0.84894257  |
| LOC643438 | 0.011175789  | 6.836569161 | 0.849031314 |
| A2ML1     | -0.004795735 | 5.970533135 | 0.849116756 |
| LOC647015 | 0.00475902   | 6.007344787 | 0.849194425 |
| TCEAL6    | 0.004668005  | 5.995989594 | 0.849203532 |
| OR7C2     | -0.005037592 | 6.167054269 | 0.849226583 |
| LOC126860 | 0.005397071  | 5.987457254 | 0.849229761 |
| ACSM1     | 0.004726956  | 5.947212737 | 0.849434399 |
| SERPINA6  | 0.00502824   | 5.904244435 | 0.849435416 |
| PTCD1     | -0.008257904 | 8.561318326 | 0.849442283 |
| LOC650628 | -0.007266387 | 6.077447757 | 0.849450124 |
| TPI1      | 0.008552374  | 12.15057548 | 0.849455127 |
| MAN1C1    | -0.010586159 | 7.69871368  | 0.849515643 |
| RNF8      | -0.005410081 | 6.941318816 | 0.849661926 |
| LOC649783 | -0.005575732 | 5.972524641 | 0.849708212 |
| LOC648220 | -0.005129573 | 6.038987442 | 0.849859544 |
| LOC646400 | -0.004842635 | 6.128203177 | 0.849991996 |
| NTF5      | 0.005010247  | 6.072002445 | 0.850024605 |
| LOC645737 | -0.004949267 | 6.210391888 | 0.850048517 |
| AFAR3     | 0.006049237  | 6.149681015 | 0.850082388 |
| LOC652875 | -0.004715543 | 5.99345162  | 0.850154504 |
| LOC641975 | 0.006271361  | 6.201887361 | 0.850160668 |
| LOC642384 | 0.004534711  | 6.331621811 | 0.850191267 |
| LOC648173 | -0.004988329 | 6.111700923 | 0.850340397 |

## DEG.infomation

|           |              |             |             |
|-----------|--------------|-------------|-------------|
| FLJ35740  | -0.005836467 | 6.037237379 | 0.850387061 |
| MMP12     | 0.003810197  | 5.946055325 | 0.85039959  |
| DZIP1L    | 0.009225296  | 6.414711074 | 0.850441767 |
| C14ORF101 | 0.005941011  | 6.176966219 | 0.850450222 |
| LOC650843 | -0.004840003 | 6.083425749 | 0.850457964 |
| LOC644994 | 0.004489883  | 6.129190644 | 0.850516583 |
| LOC642714 | 0.005290294  | 6.164943439 | 0.850663161 |
| C2ORF44   | -0.009027728 | 7.50578824  | 0.850675955 |
| CLDN16    | -0.003211003 | 6.104209091 | 0.850724836 |
| BIN1      | 0.011806804  | 8.151747688 | 0.850726987 |
| LOC440059 | -0.004624119 | 6.030859336 | 0.850778433 |
| LOC729485 | 0.004889354  | 6.206944707 | 0.850783271 |
| OR2T27    | 0.004822771  | 6.011733704 | 0.850868891 |
| LOC402377 | -0.004606551 | 6.095575599 | 0.850936284 |
| EGR4      | 0.005000083  | 6.072886474 | 0.850983651 |
| ARSE      | 0.004472161  | 5.997045203 | 0.85099324  |
| BRWD2     | 0.007493788  | 7.090672943 | 0.851004182 |
| LOC653580 | 0.004815653  | 6.264124692 | 0.851045821 |
| BLVRB     | 0.014892411  | 9.382787096 | 0.851094084 |
| LOC649248 | -0.004978461 | 6.12563098  | 0.851137969 |
| LOC652771 | -0.005714014 | 6.140323825 | 0.851243847 |
| LOC644612 | 0.00515683   | 6.018080191 | 0.851248234 |
| LOC389631 | -0.004739161 | 5.973622987 | 0.851518221 |
| KRT14     | -0.00474661  | 6.007945879 | 0.851547347 |
| MPHOSPH6  | 0.012452488  | 6.822552727 | 0.85167565  |
| ARFGAP2   | -0.009053    | 8.137001441 | 0.851758014 |
| LOC644925 | 0.005310922  | 6.112646934 | 0.852097628 |
| LOC646782 | -0.004627832 | 6.045216925 | 0.852101594 |
| LOC644143 | -0.005321841 | 5.907714092 | 0.852115598 |
| LOC149086 | -0.004659596 | 6.250838511 | 0.852244442 |
| SLITRK2   | -0.005197859 | 6.034739306 | 0.852286375 |
| TOMM70A   | -0.00842159  | 10.64701649 | 0.852290789 |
| LOC647806 | 0.004921607  | 6.060963233 | 0.852384814 |
| WNT2      | 0.004912245  | 6.355149027 | 0.852410598 |
| TMEM50B   | -0.008185827 | 9.069983706 | 0.852526311 |
| DEFB104A  | 0.004216423  | 6.043493413 | 0.852569091 |
| EGFL6     | 0.003853248  | 6.003763953 | 0.85259862  |
| AOX2P     | 0.004917421  | 6.175118123 | 0.852650153 |
| SNORD31   | -0.006568219 | 6.548499374 | 0.852655359 |
| FAM111B   | 0.004897782  | 6.156485007 | 0.852706328 |
| LOC649974 | -0.004184581 | 6.142766441 | 0.852779447 |
| ANKRD34B  | -0.003881315 | 5.957088958 | 0.85278833  |
| LOC645485 | 0.003412493  | 6.035146585 | 0.852871105 |
| PVRL4     | -0.004801592 | 6.002421939 | 0.852878128 |
| FBXL19    | 0.006310788  | 6.103840172 | 0.852923737 |
| KCNAB3    | 0.004798755  | 6.051393213 | 0.852971571 |
| NUMBL     | -0.008092462 | 6.085879352 | 0.852983963 |
| LOC645325 | 0.004775317  | 6.041998304 | 0.853027533 |
| LOC645066 | -0.004689024 | 5.931469087 | 0.853302855 |
| TULP2     | 0.005054421  | 5.921404832 | 0.853360597 |
| SPAG6     | -0.00353184  | 5.979164509 | 0.853425736 |

## DEG.infomation

|           |              |             |             |
|-----------|--------------|-------------|-------------|
| LOC653941 | -0.004557753 | 6.05274733  | 0.853552007 |
| FLT4      | -0.002866685 | 6.026274464 | 0.853559365 |
| PABPC4    | 0.011009044  | 11.32377283 | 0.85364155  |
| FLJ90086  | 0.006949935  | 6.310205322 | 0.853805836 |
| LOC644068 | 0.005067465  | 5.955629105 | 0.853998689 |
| AQP11     | 0.006965762  | 6.436814618 | 0.854028224 |
| LOC644420 | -0.004777072 | 5.992745242 | 0.854105421 |
| C7ORF16   | 0.004302811  | 6.118804363 | 0.854244486 |
| LOC644957 | -0.005079891 | 5.930889043 | 0.854280655 |
| LOC643339 | 0.006388104  | 6.543964469 | 0.854364174 |
| PMS2L11   | 0.005146298  | 6.274960434 | 0.85443362  |
| GFI1B     | -0.004725211 | 6.11585714  | 0.854477079 |
| OR10A2    | 0.004492064  | 5.937795432 | 0.854489691 |
| KPNA6     | -0.009104068 | 9.439846278 | 0.854527802 |
| AGMAT     | 0.003900897  | 6.057494115 | 0.854755148 |
| LOC391013 | -0.003008935 | 6.03841038  | 0.854841    |
| LOC650845 | -0.00530307  | 6.421164798 | 0.854846634 |
| NR1I2     | 0.003582324  | 6.068260054 | 0.855117838 |
| CTDSP2    | -0.007557961 | 10.04800211 | 0.855126651 |
| LOC641944 | 0.005390186  | 6.154634461 | 0.855159217 |
| LOC651289 | 0.004428268  | 6.01691916  | 0.85521809  |
| DLG3      | -0.003129436 | 6.215153867 | 0.855293107 |
| LOC732139 | 0.004185236  | 6.11969241  | 0.855302051 |
| LOC730656 | 0.00492685   | 6.058962743 | 0.855303388 |
| ADAM28    | 0.003307961  | 6.078779396 | 0.855381057 |
| LOC144383 | -0.004385983 | 6.005775568 | 0.855414724 |
| LOC648176 | 0.005602378  | 6.629861962 | 0.855566737 |
| LIN28B    | 0.005603575  | 5.948137243 | 0.855572501 |
| LOC649503 | -0.004340569 | 6.00671857  | 0.855626976 |
| C1ORF84   | -0.002371564 | 6.179733537 | 0.855641825 |
| LOC645246 | 0.004691859  | 6.027793797 | 0.855648097 |
| GPR141    | 0.003085876  | 6.072533222 | 0.855697712 |
| TCP10L2   | -0.004284831 | 6.053434363 | 0.855717221 |
| ROBO4     | 0.006819748  | 6.631918492 | 0.855721249 |
| LOC401934 | -0.005448853 | 6.38107256  | 0.855744263 |
| LOC391124 | -0.004588481 | 6.048861263 | 0.855750976 |
| MYLPF     | 0.004178072  | 5.998827647 | 0.855798845 |
| LOC643420 | 0.004971067  | 6.147896046 | 0.855807444 |
| LOC648454 | 0.004556296  | 6.062575342 | 0.855834895 |
| ABCB8     | -0.00572474  | 6.18090484  | 0.855940415 |
| SGOL1     | 0.003682975  | 6.072515966 | 0.856002906 |
| LOC133993 | -0.002824938 | 6.104583861 | 0.856054899 |
| RRM2      | 0.005382721  | 6.074976306 | 0.856136689 |
| QRFP      | 0.005352163  | 5.946997821 | 0.856220304 |
| NHLH1     | -0.005143449 | 6.096362638 | 0.856302505 |
| FLJ41649  | 0.005442688  | 5.990652561 | 0.856548789 |
| OPRM1     | -0.002158142 | 6.093149819 | 0.856558616 |
| GTF2I     | -0.004811398 | 6.33844946  | 0.856694077 |
| LOC649366 | -0.005297895 | 5.953866708 | 0.856766341 |
| C1ORF62   | -0.003234487 | 6.057748268 | 0.856828257 |
| XRCC3     | 0.004552589  | 6.294878012 | 0.856834433 |

## DEG.infomation

|               |              |             |             |
|---------------|--------------|-------------|-------------|
| IFNA13        | -0.00280703  | 6.022840331 | 0.856857521 |
| LOC646780     | 0.004823721  | 6.141507801 | 0.856881423 |
| KCNE2         | 0.004185866  | 6.026468098 | 0.856965594 |
| PRSS2         | -0.005916513 | 6.034280976 | 0.85698956  |
| MRPL22        | -0.006798692 | 10.44309026 | 0.857003412 |
| OVOL2         | -0.004879785 | 6.027934453 | 0.857050874 |
| LOC650454     | 0.003912639  | 6.056485047 | 0.857064211 |
| MST1R         | 0.004895099  | 6.096356637 | 0.857089501 |
| LOC647716     | -0.00483696  | 5.951676006 | 0.857113216 |
| DKFZP686E2433 | 0.0056709    | 6.235583063 | 0.857171278 |
| TMEM118       | -0.006561977 | 6.593302209 | 0.857182691 |
| LOC643465     | 0.004256415  | 6.0404571   | 0.857280027 |
| LOC641841     | 0.004562578  | 6.037328154 | 0.857431811 |
| HOXC12        | -0.005447908 | 5.895007313 | 0.857487636 |
| ACTN3         | -0.004155117 | 6.051937049 | 0.857491588 |
| LOC643932     | 0.005294258  | 6.505874972 | 0.857549273 |
| FOXJ3         | 0.008621182  | 9.69334512  | 0.857751304 |
| LOC643368     | -0.004666696 | 6.177792803 | 0.857908874 |
| ZKSCAN1       | 0.012151326  | 6.662369913 | 0.857987682 |
| CDC16         | 0.005857764  | 9.857482458 | 0.857989844 |
| LOC651680     | 0.005731836  | 6.335165655 | 0.858038459 |
| EMID1         | 0.005027731  | 6.053619854 | 0.858087752 |
| PHEX          | -0.00506576  | 6.068615528 | 0.858099414 |
| LOC732387     | 0.003704706  | 6.027779306 | 0.858265977 |
| KIAA1920      | -0.004951051 | 6.160064994 | 0.858290797 |
| ARF6          | 0.007412498  | 6.156148479 | 0.858291351 |
| LOC389405     | 0.004209245  | 6.122506379 | 0.858334762 |
| LOC728080     | 0.004229102  | 6.112310437 | 0.858357322 |
| SPINK4        | -0.004224882 | 5.951187337 | 0.858447556 |
| WFDC9         | -0.004299085 | 6.006931045 | 0.858511881 |
| LOC651513     | -0.004500777 | 5.961519787 | 0.858617354 |
| LOC653429     | 0.003990559  | 6.037592345 | 0.858696004 |
| FAM54A        | -0.003236095 | 6.13565148  | 0.858704207 |
| LOC728216     | -0.007881551 | 6.220365975 | 0.858773555 |
| LOC389396     | -0.004530981 | 5.980742973 | 0.858774118 |
| PIGG          | 0.005652987  | 6.573182712 | 0.859134555 |
| WAC           | -0.008000349 | 9.241678395 | 0.859204527 |
| NYX           | 0.004128717  | 6.052736287 | 0.8592465   |
| EDG7          | -0.005508386 | 6.2461509   | 0.859310572 |
| LOC641958     | -0.004376408 | 6.016201018 | 0.859536407 |
| NOVA2         | 0.005651806  | 6.225685088 | 0.859561979 |
| B3GALNT2      | -0.006017957 | 6.804567578 | 0.859615162 |
| GPR101        | 0.004274399  | 6.228974464 | 0.859737521 |
| SYT12         | -0.004399024 | 6.184230435 | 0.859793228 |
| LOC649500     | -0.004853161 | 6.16481656  | 0.859804752 |
| RPL23A        | -0.009630793 | 7.475880583 | 0.859810802 |
| SLC34A1       | -0.006256837 | 6.104361594 | 0.859815321 |
| SNORD107      | -0.002826366 | 5.982586343 | 0.859832539 |
| PSMB7         | -0.007517732 | 11.44542839 | 0.8598728   |
| DNAJC17       | 0.00492715   | 7.159610997 | 0.8600277   |
| OR1F1         | 0.004014596  | 5.985045976 | 0.860099208 |

## DEG.infomation

|           |              |             |             |
|-----------|--------------|-------------|-------------|
| LOC652554 | 0.004139931  | 6.011656197 | 0.860191758 |
| EIF4EBP2  | -0.007694793 | 8.118209952 | 0.860277073 |
| LOC652842 | 0.004540378  | 6.03084065  | 0.860477227 |
| LOC390667 | 0.004546473  | 6.187326888 | 0.860578602 |
| LOC158572 | -0.005606662 | 6.381189577 | 0.860627941 |
| LOC647881 | 0.00295073   | 6.008117739 | 0.860630707 |
| CUBN      | 0.005103661  | 6.140736956 | 0.860666545 |
| MS4A12    | 0.00454112   | 6.039828349 | 0.860708238 |
| COPG      | -0.009054683 | 8.912866088 | 0.860730789 |
| ZNF639    | 0.004360376  | 6.137271376 | 0.860759381 |
| FGF22     | -0.004614309 | 5.944447248 | 0.860770498 |
| LOC650841 | -0.004460369 | 6.071006434 | 0.860807305 |
| TAS2R42   | 0.003681971  | 5.977756393 | 0.860856887 |
| LOC152742 | 0.004098696  | 5.992577571 | 0.860859581 |
| PGF       | -0.010072343 | 6.5705022   | 0.861012888 |
| LOC645446 | -0.004775727 | 6.117410636 | 0.861020562 |
| MGC27165  | 0.004518594  | 6.025460338 | 0.861087817 |
| C4ORF8    | 0.006778243  | 7.437103887 | 0.861124345 |
| DEPDC1    | -0.003274469 | 5.966099614 | 0.861200314 |
| ELAC1     | -0.004502716 | 6.264878573 | 0.861211372 |
| LOC653293 | 0.003376508  | 6.096995507 | 0.861212188 |
| LOC643409 | 0.004458427  | 6.041534932 | 0.86133185  |
| SFTPA1    | 0.004773586  | 6.026955    | 0.861403146 |
| IMP5      | 0.005542723  | 6.152580558 | 0.861468682 |
| CAMK1G    | 0.005800149  | 6.195192602 | 0.861476569 |
| FOXD4L2   | -0.002543135 | 5.998335009 | 0.861486281 |
| GPR119    | 0.005184715  | 6.716534142 | 0.861637424 |
| HSFY1     | 0.003088323  | 5.999702907 | 0.861693763 |
| LOC401589 | -0.003051351 | 6.193110115 | 0.861746929 |
| FLJ35424  | -0.002490485 | 6.162627243 | 0.861804783 |
| KRT85     | -0.004200941 | 6.091729328 | 0.861894043 |
| LOC644288 | -0.00408023  | 5.904388067 | 0.86195849  |
| TRDN      | 0.005481952  | 6.39285342  | 0.861971277 |
| LOC645442 | -0.004672081 | 6.120548967 | 0.861979388 |
| OTOP1     | 0.004725888  | 6.226824916 | 0.862146179 |
| OR10A3    | 0.004578933  | 5.937970891 | 0.86217425  |
| FLJ10120  | 0.004443102  | 6.149650849 | 0.862236511 |
| CRYBB2    | -0.013005049 | 6.624097212 | 0.862319835 |
| KPRP      | 0.004192047  | 6.050434025 | 0.862361453 |
| LOC644246 | 0.004620242  | 5.959347104 | 0.862498396 |
| UBA2      | 0.008552714  | 6.301378002 | 0.862516004 |
| C19ORF15  | 0.004018769  | 6.154250062 | 0.86252249  |
| PROP1     | 0.005396199  | 6.148501817 | 0.862575247 |
| ST7OT4    | -0.004404962 | 5.986489484 | 0.862667424 |
| LOC440422 | -0.00317532  | 6.036208343 | 0.862748101 |
| SLC27A4   | 0.008636381  | 5.982347688 | 0.862900947 |
| C21ORF114 | 0.004059362  | 5.990295756 | 0.862926523 |
| LOC645167 | 0.004251848  | 6.270168714 | 0.862957949 |
| PCDHGB8P  | -0.004156725 | 6.052762864 | 0.863025182 |
| LOC653866 | 0.002851121  | 6.000775388 | 0.863052137 |
| TOE1      | 0.004193187  | 6.378745039 | 0.863090109 |

## DEG.infomation

|           |              |             |             |
|-----------|--------------|-------------|-------------|
| LOC645850 | 0.00436343   | 6.075067286 | 0.863130939 |
| LOC642165 | -0.004609401 | 6.061659174 | 0.863428197 |
| LOC653137 | 0.004872733  | 6.43502665  | 0.863765271 |
| LOC651537 | -0.004164187 | 6.060620768 | 0.863771572 |
| RYK       | 0.005592343  | 8.910184928 | 0.863859899 |
| ACBD7     | 0.003383756  | 5.966304659 | 0.863873346 |
| LOC644342 | -0.004040009 | 5.964224126 | 0.863884005 |
| ACTL7B    | 0.005041211  | 6.193894099 | 0.863890163 |
| LOC652840 | 0.00616886   | 5.971516333 | 0.863957878 |
| C14ORF162 | -0.005100908 | 6.096167405 | 0.864056493 |
| LOC441662 | 0.003459614  | 6.189718765 | 0.864094535 |
| USP37     | 0.006073289  | 7.100922924 | 0.864293849 |
| LOC644943 | -0.004166805 | 6.094543423 | 0.864381882 |
| LOC653796 | -0.004426305 | 6.213455184 | 0.864547611 |
| LOC650687 | -0.004462287 | 5.961942824 | 0.864612079 |
| LOC339766 | -0.004325481 | 6.110571174 | 0.864646605 |
| EPHA10    | -0.004084249 | 6.35550902  | 0.864655447 |
| AHCYL1    | 0.010166398  | 9.654900229 | 0.864715655 |
| DHX38     | -0.007894228 | 7.395507206 | 0.864724365 |
| LOC652544 | -0.004856211 | 5.912043078 | 0.86493888  |
| UQCRC1    | -0.011777734 | 11.69052708 | 0.8649391   |
| SLC25A37  | 0.008586404  | 8.106417457 | 0.865052374 |
| PHACS     | -0.006280673 | 6.599413568 | 0.865052921 |
| LOC284379 | 0.003249231  | 6.077470392 | 0.865100833 |
| C15ORF39  | -0.006710659 | 6.945367465 | 0.865120056 |
| LOC391703 | -0.004509415 | 6.193550674 | 0.865138062 |
| ATP6V1C2  | -0.003346021 | 5.985344082 | 0.865148696 |
| STEAP2    | -0.008845759 | 6.749943233 | 0.865198365 |
| FDPSSL2A  | 0.004711873  | 6.157456019 | 0.865211703 |
| CDH18     | -0.004056615 | 5.857597287 | 0.865259154 |
| HTR1A     | -0.00494522  | 5.999453589 | 0.865532583 |
| LOC642377 | -0.004655696 | 6.480863161 | 0.865900558 |
| LOC647123 | 0.00423853   | 6.082017093 | 0.865907504 |
| CAPSL     | -0.002547907 | 6.080782821 | 0.865969626 |
| CBX8      | 0.004991375  | 6.439883472 | 0.865986135 |
| BANF2     | -0.004998822 | 6.14588696  | 0.866014135 |
| INTS5     | -0.005524371 | 7.214721999 | 0.866022588 |
| TP53BP1   | 0.009334549  | 7.917771091 | 0.86609973  |
| ALLC      | 0.002599858  | 6.053680786 | 0.86610751  |
| OR52J3    | -0.004110427 | 6.011187614 | 0.866229535 |
| LOC392979 | 0.004296541  | 6.072208738 | 0.866266997 |
| DDX3Y     | -0.006597724 | 6.050763399 | 0.866269032 |
| LOC654046 | 0.004724405  | 6.087637477 | 0.866315012 |
| FMO1      | -0.006642227 | 6.285203528 | 0.866377887 |
| SPTBN4    | -0.003082036 | 6.162290104 | 0.86640517  |
| OR10G2    | -0.004242445 | 6.058739686 | 0.866524965 |
| GEFT      | 0.003186988  | 6.155905534 | 0.866535685 |
| DNTTIP2   | 0.007371085  | 6.235145361 | 0.867243457 |
| LPHN2     | -0.011075207 | 8.260220109 | 0.867385326 |
| LOC654078 | 0.00672528   | 6.057706854 | 0.867405513 |
| FAM35A    | 0.004238356  | 6.615776681 | 0.867418402 |



## DEG.infomation

|           |              |             |             |
|-----------|--------------|-------------|-------------|
| SHANK2    | 0.002788233  | 6.046274814 | 0.867435034 |
| HOXB9     | -0.004382267 | 5.970641878 | 0.867490548 |
| ZFPM1     | 0.009157448  | 7.696530803 | 0.867517661 |
| LOC732300 | 0.004184797  | 6.266342469 | 0.867655072 |
| CHI3L1    | 0.004257268  | 6.029959167 | 0.867680166 |
| LOC649429 | -0.004660615 | 6.0746424   | 0.867876795 |
| LOC340529 | -0.004133724 | 6.004932547 | 0.867963791 |
| KRTAP9-4  | -0.002941776 | 6.128796364 | 0.868038182 |
| FAM159A   | -0.003933326 | 6.063874956 | 0.868055078 |
| LOC650103 | 0.003745787  | 5.943740133 | 0.868062062 |
| DBX2      | -0.003607141 | 6.078417312 | 0.868083059 |
| LOC653981 | -0.004335031 | 6.302471257 | 0.86816217  |
| PPP5C     | -0.006352371 | 6.136059156 | 0.868347069 |
| ATP5B     | -0.007665924 | 14.65937991 | 0.86868243  |
| LOC653569 | -0.005318143 | 6.044930495 | 0.868762482 |
| TEKT1     | 0.005020193  | 6.205546812 | 0.868927263 |
| KIAA1967  | 0.006423841  | 6.854732866 | 0.868937826 |
| CCDC135   | -0.003318888 | 6.368805977 | 0.868989609 |
| DUS2L     | -0.006119522 | 7.608739499 | 0.869141457 |
| CXCL14    | -0.007834161 | 6.505035595 | 0.869181938 |
| LOC650024 | -0.004459981 | 6.047284562 | 0.869242475 |
| LOC651177 | -0.004128858 | 5.928801603 | 0.869429452 |
| RNF168    | -0.004238326 | 6.172291979 | 0.869501034 |
| CLCA1     | -0.004543258 | 5.93100491  | 0.869643547 |
| LOC652587 | -0.003793498 | 5.9671253   | 0.869738616 |
| OR9K2     | 0.004120999  | 5.969090654 | 0.869848616 |
| LBP       | -0.005422069 | 6.04817602  | 0.869913038 |
| LOC651453 | -0.009347973 | 7.118220727 | 0.869989167 |
| PSMG1     | -0.008823036 | 8.184837979 | 0.870189731 |
| LRRC37A2  | -0.004244011 | 5.941392162 | 0.870201392 |
| KCNE1L    | 0.004888689  | 6.144041392 | 0.870215113 |
| LOC647683 | -0.004176031 | 5.88251388  | 0.870256525 |
| ISL2      | 0.006134871  | 6.140617983 | 0.870346511 |
| LOC729692 | 0.006090873  | 6.414999368 | 0.87046191  |
| KLHDC7A   | 0.004532844  | 6.213210444 | 0.870480428 |
| LOC651116 | 0.003472047  | 6.054811954 | 0.87052143  |
| COPB1     | 0.006775529  | 9.091238533 | 0.870613204 |
| PARD6G    | 0.002738734  | 6.142651961 | 0.870646609 |
| LOC645876 | 0.004084508  | 5.932020778 | 0.870753505 |
| LYZL6     | 0.004288674  | 6.238961795 | 0.870873186 |
| LOC649120 | 0.005216021  | 6.001645656 | 0.871044688 |
| NAV3      | 0.006891498  | 6.546520333 | 0.871202102 |
| SYT6      | -0.004012174 | 6.031602371 | 0.871227929 |
| GRHL3     | -0.002254708 | 6.022837227 | 0.871249578 |
| ABHD7     | 0.007799016  | 6.250488294 | 0.871345298 |
| DLC1      | -0.010206777 | 7.581986244 | 0.87135458  |
| LOC653140 | 0.00384621   | 6.051727087 | 0.871361465 |
| LOC652755 | 0.010987365  | 6.582078389 | 0.871387124 |
| LRFN4     | -0.007298913 | 6.671885143 | 0.871423494 |
| LOC651403 | -0.004769665 | 5.953748139 | 0.871488756 |
| TTC9B     | -0.004410293 | 6.025971046 | 0.871553752 |

## DEG.infomation

|           |              |             |             |
|-----------|--------------|-------------|-------------|
| LOC647074 | 0.005849424  | 6.163510606 | 0.871576657 |
| CD80      | -0.004053775 | 6.063426465 | 0.871639868 |
| LOC400099 | 0.004112959  | 6.112002051 | 0.871733789 |
| LOC652859 | 0.004926437  | 6.017586279 | 0.871837548 |
| LOC652519 | 0.003520929  | 6.035959833 | 0.872042659 |
| LMF1      | 0.004652543  | 6.286246729 | 0.872054425 |
| LOC644472 | 0.005606925  | 5.96949774  | 0.872067632 |
| DUB3      | 0.004394969  | 6.025920038 | 0.872225994 |
| LOC646638 | -0.003957344 | 6.043659694 | 0.872362209 |
| LOC647624 | -0.004111792 | 6.224048502 | 0.872465446 |
| HNF4G     | 0.003992279  | 6.085600998 | 0.872714443 |
| PNMA5     | -0.003970223 | 5.891297149 | 0.872819455 |
| LOC728626 | -0.004205559 | 6.032468105 | 0.872821861 |
| EYA4      | 0.007376917  | 6.682926228 | 0.872907784 |
| HIST1H3C  | 0.005139754  | 6.400187272 | 0.87291146  |
| LOC643731 | 0.003791237  | 6.058474858 | 0.872944356 |
| LOC647243 | -0.004212989 | 6.43816461  | 0.872944554 |
| UGT1A3    | 0.005169235  | 6.084158937 | 0.873110501 |
| LOC649137 | 0.003683392  | 6.024330714 | 0.873191491 |
| LOC391742 | 0.004545065  | 6.218765185 | 0.873219737 |
| CYP2D7P1  | -0.002860763 | 6.243258135 | 0.873267909 |
| LOC642005 | -0.003719804 | 5.979966292 | 0.873345059 |
| LOC220594 | 0.0036552    | 5.895530405 | 0.87341175  |
| C10ORF85  | 0.004469225  | 6.25222362  | 0.873432014 |
| LOC642011 | -0.004153952 | 5.969928147 | 0.873493149 |
| MGC16121  | -0.008934065 | 6.885303319 | 0.87362129  |
| LOC441752 | 0.004048221  | 6.050004492 | 0.873622115 |
| OR6T1     | -0.003816779 | 5.948794523 | 0.873840625 |
| FAM125B   | 0.004062606  | 6.648526126 | 0.873920951 |
| LOC652734 | -0.005772295 | 6.112921287 | 0.873946675 |
| LOC648354 | 0.003490825  | 6.066362149 | 0.874004238 |
| LOC642164 | 0.003636143  | 5.97023767  | 0.87403751  |
| TEX14     | 0.002989988  | 5.988684428 | 0.874045958 |
| CBFA2T3   | -0.003276204 | 6.148274537 | 0.874081652 |
| LOC650520 | 0.004481823  | 6.013194203 | 0.874136442 |
| MAGEA1    | 0.003343899  | 6.092690498 | 0.87416171  |
| LOC644641 | 0.004412813  | 6.179889426 | 0.874219153 |
| LOC650656 | -0.003743068 | 6.061531825 | 0.874332403 |
| LOC645410 | -0.004553281 | 5.873805566 | 0.87448359  |
| TM4SF4    | -0.004161326 | 6.003059829 | 0.874505505 |
| ITM2B     | 0.009175952  | 10.97292032 | 0.874562971 |
| AP4E1     | 0.0073331    | 7.791022821 | 0.874727901 |
| FAAH      | -0.004678783 | 6.155183685 | 0.874750696 |
| SIGLEC6   | -0.003034234 | 6.155110029 | 0.874855302 |
| LOC649182 | -0.004454661 | 6.203834369 | 0.874859324 |
| LOC652003 | 0.00496693   | 6.041286499 | 0.874938845 |
| FLJ45139  | 0.004066042  | 6.003286728 | 0.874941855 |
| IL27      | 0.004068246  | 5.985899513 | 0.875014731 |
| FLJ45032  | -0.002721897 | 6.052867187 | 0.875139295 |
| LOC643062 | 0.004216289  | 5.999621367 | 0.875154379 |
| LILRA1    | -0.004069341 | 6.094897694 | 0.875201275 |

## DEG.infomation

|           |              |             |             |
|-----------|--------------|-------------|-------------|
| FLJ22447  | -0.002508164 | 6.064150898 | 0.875228197 |
| RAB31     | 0.012083574  | 9.751606103 | 0.875256586 |
| KIAA1274  | 0.007939821  | 6.087196469 | 0.875262195 |
| LOC652436 | -0.003649655 | 6.041703625 | 0.875269958 |
| DGKE      | -0.004368961 | 5.952157376 | 0.875369174 |
| CLDN10    | -0.003060718 | 6.098594202 | 0.875436666 |
| FAM111A   | -0.00621504  | 7.618148223 | 0.875440341 |
| CREBL2    | -0.006574222 | 6.138632949 | 0.875516481 |
| UNC93A    | 0.003768832  | 6.089544197 | 0.875530903 |
| RUTBC2    | 0.004184729  | 6.079370637 | 0.87559804  |
| LOC644929 | -0.004674471 | 6.222961629 | 0.875648937 |
| LOC649201 | 0.003626888  | 5.950825459 | 0.875732311 |
| CNKS2     | 0.003926538  | 6.262328209 | 0.875818117 |
| CACNA1A   | -0.0029985   | 5.975320235 | 0.875885391 |
| LOC650074 | 0.003790705  | 6.03837036  | 0.875967968 |
| PSMC2     | -0.004395026 | 10.80546887 | 0.875984548 |
| LOC642672 | -0.00397925  | 6.092305607 | 0.876024153 |
| LOC651520 | 0.004016112  | 6.340116046 | 0.876034163 |
| MOS       | 0.005551733  | 6.067353762 | 0.876066843 |
| LOC648058 | 0.003622198  | 6.222362151 | 0.876372355 |
| LOC732157 | 0.003609425  | 6.236037592 | 0.87642141  |
| LOC388692 | -0.00519175  | 6.076872118 | 0.876616938 |
| LOC644489 | -0.003795281 | 5.953228814 | 0.876630504 |
| RNF186    | 0.005230408  | 6.064785405 | 0.876632407 |
| UPF1      | 0.007176419  | 7.579766254 | 0.876663309 |
| NY-REN-7  | -0.004876831 | 6.499079746 | 0.876863341 |
| TEAD3     | -0.006677904 | 6.718664229 | 0.87689464  |
| PA2G4P4   | 0.006711441  | 6.029333813 | 0.876916991 |
| DDX25     | 0.003027992  | 6.033097125 | 0.876919157 |
| LOC400509 | 0.004224338  | 5.987808762 | 0.876951626 |
| ZNF273    | 0.003051363  | 6.061555977 | 0.877019026 |
| GPD2      | -0.002752536 | 6.053957683 | 0.877082634 |
| EPHB6     | 0.004201492  | 6.202229345 | 0.877297205 |
| LOC643767 | -0.004396655 | 6.034827016 | 0.877357521 |
| OR2AK2    | -0.005038293 | 6.090639827 | 0.877377804 |
| AMPD2     | 0.003139757  | 5.988417538 | 0.877440305 |
| DSC3      | 0.003288152  | 6.067971961 | 0.877570943 |
| LOC643501 | -0.003599788 | 6.04871733  | 0.87762994  |
| OR10T2    | 0.003813742  | 6.008880938 | 0.877676654 |
| NR1D1     | -0.004219784 | 6.222631252 | 0.87778775  |
| USPL1     | -0.006188002 | 7.653995098 | 0.877841106 |
| LOC650889 | -0.003970521 | 6.251031877 | 0.877918517 |
| FLJ10404  | 0.003171231  | 6.288537199 | 0.878096915 |
| LOC401399 | 0.00345289   | 5.997478263 | 0.878134444 |
| LOC653711 | 0.004491102  | 6.354988132 | 0.878147885 |
| LOC729252 | 0.003812852  | 6.24972447  | 0.878268959 |
| LOC643857 | 0.004148956  | 6.135371957 | 0.87830392  |
| LOC653665 | -0.004057861 | 5.90753222  | 0.878325305 |
| C7ORF60   | 0.004208158  | 5.969119416 | 0.878327438 |
| NBL1      | 0.013093623  | 9.245524039 | 0.878359998 |
| ITFG3     | 0.009665902  | 9.698691236 | 0.878372075 |

## DEG.infomation

|           |              |             |             |
|-----------|--------------|-------------|-------------|
| WIPF2     | -0.004293271 | 6.825670877 | 0.878394811 |
| AQP3      | -0.005629778 | 5.922797536 | 0.878435947 |
| TNIP3     | 0.004052698  | 6.097960922 | 0.878496163 |
| C20ORF144 | -0.003815174 | 5.892383472 | 0.878528006 |
| PRH1      | -0.002893218 | 6.266213708 | 0.87858672  |
| LOC653148 | -0.004115652 | 5.974260235 | 0.878665862 |
| CACNB1    | 0.003419328  | 6.250494549 | 0.878726701 |
| LOC652657 | -0.005087051 | 6.117786942 | 0.878762965 |
| RGS12     | -0.002493219 | 6.56120342  | 0.878781953 |
| C18ORF24  | 0.004281592  | 6.2548947   | 0.878817938 |
| RPS24     | 0.011751081  | 11.29675862 | 0.878866441 |
| LOC644444 | 0.004119638  | 5.949796387 | 0.878879429 |
| LOC652215 | -0.004573428 | 5.820908035 | 0.878903512 |
| LOC641724 | 0.004425359  | 6.196793756 | 0.878961873 |
| ZNF282    | 0.005355505  | 7.319229717 | 0.879062682 |
| FUT1      | 0.0051333    | 6.176067763 | 0.879190535 |
| HOXA3     | -0.002089389 | 6.029215646 | 0.879199998 |
| LOC644567 | 0.002934113  | 6.043377865 | 0.879214084 |
| CCDC140   | 0.006149227  | 7.089997207 | 0.879416357 |
| PBX3      | -0.010473884 | 10.73631832 | 0.879451607 |
| OR4Q3     | 0.00267021   | 6.006508145 | 0.879499751 |
| LOC644512 | 0.003450835  | 5.962298638 | 0.879535657 |
| LOC642691 | -0.004090336 | 6.329092838 | 0.879664467 |
| WNT3A     | -0.004093498 | 5.99271775  | 0.879729601 |
| LOC541469 | -0.005607522 | 6.154609038 | 0.879832008 |
| IFNA7     | 0.003237559  | 6.06075031  | 0.879843244 |
| FLJ44635  | -0.003143929 | 6.062895585 | 0.879874949 |
| USP50     | 0.003505722  | 5.941939085 | 0.879884164 |
| ZFYVE19   | 0.006650561  | 7.924971759 | 0.88002317  |
| LOC284100 | 0.003484536  | 6.102378005 | 0.880061125 |
| CPSF3L    | -0.00532498  | 7.436578067 | 0.880157781 |
| RBPJL     | -0.003779868 | 6.163975059 | 0.880162516 |
| ZNF600    | -0.008093703 | 6.898163853 | 0.880168945 |
| LOC122038 | -0.003783275 | 6.005493787 | 0.880399482 |
| STMN2     | 0.003224406  | 6.370888987 | 0.880401587 |
| LOC440258 | -0.004249969 | 6.307019897 | 0.880420175 |
| CABP2     | -0.002416888 | 6.112962942 | 0.880481302 |
| LOC651610 | 0.003579383  | 6.071264175 | 0.880579189 |
| MKLN1     | -0.006424142 | 9.646669901 | 0.880739946 |
| LOC653930 | -0.002360083 | 6.133305039 | 0.880891467 |
| KLK3      | -0.002532542 | 5.982674851 | 0.880961434 |
| LOC642248 | -0.003440166 | 6.032248084 | 0.881114805 |
| LOC645492 | -0.003737298 | 6.154957486 | 0.881295703 |
| LOC649501 | 0.003417652  | 6.144874794 | 0.881319558 |
| P53AIP1   | -0.002848338 | 5.997645834 | 0.881365345 |
| GALNT14   | 0.004350705  | 6.456489022 | 0.881440371 |
| LOC341356 | -0.003735782 | 5.984872535 | 0.881493777 |
| SDC3      | -0.002609149 | 6.240547211 | 0.881504359 |
| FSTL3     | -0.017444403 | 9.095332167 | 0.881546094 |
| MAPK15    | 0.00437544   | 6.236171802 | 0.881713211 |
| CD180     | 0.003965302  | 6.093444424 | 0.881843819 |

## DEG.infomation

|           |              |             |             |
|-----------|--------------|-------------|-------------|
| GM127     | 0.004385678  | 6.127334672 | 0.881847728 |
| LOC647810 | -0.004469862 | 5.993618676 | 0.881859338 |
| LOC728181 | -0.005228931 | 6.129331945 | 0.881862619 |
| ZNF678    | -0.005471306 | 5.819936401 | 0.881901947 |
| TRPV3     | -0.004226134 | 6.214948918 | 0.881995164 |
| FAM22C    | 0.003637397  | 6.049111618 | 0.882013779 |
| LOC643234 | -0.003709891 | 6.109464067 | 0.882029699 |
| FLJ42280  | 0.004342121  | 6.008347401 | 0.882052935 |
| LOC149620 | 0.003742942  | 6.200200118 | 0.882326241 |
| DCDC2B    | 0.003984792  | 5.954023971 | 0.882354393 |
| MRPL30    | -0.005109162 | 7.176092577 | 0.88239276  |
| CDCA5     | -0.005067782 | 6.506671528 | 0.882470294 |
| KCNK2     | 0.00200857   | 6.027577266 | 0.88258203  |
| FLJ30430  | -0.003918002 | 6.171997834 | 0.882633534 |
| SPC25     | -0.002871868 | 6.040149586 | 0.882636874 |
| CDCA1     | -0.004468506 | 5.99457436  | 0.88265441  |
| LOC645565 | 0.004226     | 5.934748421 | 0.882655848 |
| LOC643296 | -0.003775302 | 5.978022415 | 0.882672659 |
| BARD1     | 0.006799169  | 6.845408169 | 0.882688271 |
| LOC643648 | -0.003743707 | 6.163261978 | 0.882691115 |
| ABCG8     | 0.003486556  | 6.05380852  | 0.882748678 |
| OR8H2     | 0.002654276  | 5.986215549 | 0.882756822 |
| FLJ20397  | 0.001957156  | 6.080663433 | 0.882842271 |
| EGFL8     | -0.008572092 | 7.505912111 | 0.882953706 |
| IHPK2     | -0.004119763 | 6.666156551 | 0.882969656 |
| C9ORF89   | 0.006354765  | 8.080313772 | 0.882978225 |
| SNORD73A  | -0.004000723 | 6.181257646 | 0.883072289 |
| POU2AF1   | -0.003689133 | 6.162860894 | 0.883148901 |
| LOC651830 | -0.004206599 | 5.954627781 | 0.883168978 |
| LOC647647 | 0.003393756  | 6.047778576 | 0.88319375  |
| CMTM1     | -0.002688952 | 6.06653271  | 0.883227146 |
| LOC646193 | 0.003644891  | 5.948808276 | 0.883242672 |
| LOC340204 | 0.004166165  | 6.036437461 | 0.883263981 |
| TMEM169   | 0.003511302  | 6.125843794 | 0.883402495 |
| LOC641983 | -0.002968849 | 6.127470455 | 0.883524373 |
| C9ORF38   | -0.004391872 | 6.199094274 | 0.883574889 |
| ZNF485    | 0.003977554  | 6.168359156 | 0.88358805  |
| CHRD1     | -0.002715004 | 6.004611346 | 0.883623418 |
| LOC163233 | 0.002529404  | 6.105844391 | 0.883644459 |
| TLR7      | -0.005784026 | 6.370977057 | 0.88365448  |
| LOC653431 | 0.004744977  | 5.868784431 | 0.883766218 |
| ZNF496    | 0.004224699  | 6.083952633 | 0.883883831 |
| LOC646209 | 0.003854381  | 6.065803305 | 0.883888146 |
| ATG2B     | 0.004522697  | 6.876495871 | 0.883888244 |
| C2ORF83   | -0.003595484 | 6.060534925 | 0.883933838 |
| GRID1     | 0.003607741  | 6.002774872 | 0.883981032 |
| KIAA1755  | 0.00500591   | 6.060672908 | 0.884059304 |
| LOC644599 | -0.003790053 | 6.231506225 | 0.884104691 |
| LOC653720 | -0.00482158  | 6.545994927 | 0.884305645 |
| LOC652335 | 0.003162979  | 6.121980979 | 0.884338805 |
| BRI3      | 0.006992603  | 10.73656034 | 0.884348862 |

## DEG.infomation

|           |              |             |             |
|-----------|--------------|-------------|-------------|
| LIN7A     | 0.005864302  | 6.592730728 | 0.8844022   |
| BTBD16    | 0.003914713  | 6.231503116 | 0.884623668 |
| LOC402457 | -0.00347464  | 6.064969534 | 0.884766444 |
| BRUNOL4   | -0.002034149 | 6.070888469 | 0.884775794 |
| P2RY12    | -0.003860039 | 6.137727113 | 0.884776886 |
| CRTAP     | 0.005579734  | 7.338591158 | 0.884781366 |
| PIPOX     | 0.003937059  | 5.992598982 | 0.884793791 |
| LOC650187 | -0.00353057  | 5.995358475 | 0.884868685 |
| LOC729096 | 0.003586072  | 6.062979948 | 0.884988461 |
| IFIT3     | 0.011644633  | 7.000682049 | 0.885117085 |
| LOC642936 | -0.003568383 | 6.234843198 | 0.885361065 |
| C19ORF46  | 0.003952186  | 6.05144935  | 0.885361878 |
| LOC643640 | 0.003950693  | 6.07428393  | 0.885467126 |
| GPR109A   | 0.004424737  | 5.940317126 | 0.885512376 |
| LOC641943 | 0.003725164  | 6.054759045 | 0.885526761 |
| LOC642255 | -0.003462094 | 6.817333837 | 0.885637318 |
| TMEM16J   | -0.003362597 | 5.974879216 | 0.885649695 |
| PHLDA3    | -0.007327394 | 7.112871887 | 0.886009214 |
| SEBOX     | 0.003315375  | 6.194166155 | 0.886034619 |
| FUT10     | 0.00250786   | 6.123758282 | 0.886046397 |
| LOC728369 | -0.002357136 | 6.125927385 | 0.88604936  |
| LOC149069 | 0.003621297  | 5.98016073  | 0.886086334 |
| CSMD3     | 0.002328342  | 5.9891906   | 0.886088558 |
| HSP90AB2P | 0.002912477  | 6.147937814 | 0.886104199 |
| LOC390748 | -0.002262619 | 6.1123136   | 0.886205227 |
| OR8D1     | 0.003554094  | 6.054346079 | 0.886275839 |
| DSCR4     | -0.004317156 | 6.066200387 | 0.88630313  |
| FUT2      | -0.004019432 | 5.764011531 | 0.886360156 |
| LOC652173 | -0.003541796 | 6.083789398 | 0.886395869 |
| WASPIP    | -0.007137163 | 7.277068958 | 0.886409513 |
| GAPDH     | 0.005003363  | 12.89753697 | 0.886437506 |
| ATP6V0D2  | 0.003719758  | 6.232996914 | 0.886511466 |
| CFHR1     | 0.004522169  | 6.163327148 | 0.886532354 |
| LOC653043 | 0.003174203  | 6.118129215 | 0.886632026 |
| LOC728185 | 0.004019417  | 5.818778632 | 0.88670286  |
| LOC647788 | 0.003786495  | 6.057756084 | 0.886715453 |
| LOC653192 | 0.003428302  | 6.072505357 | 0.886724771 |
| LOC283029 | -0.003518478 | 6.075066872 | 0.886810641 |
| LOC651166 | -0.00346376  | 6.413191537 | 0.886925475 |
| MMRN1     | 0.00855348   | 6.36726701  | 0.886946082 |
| CREBL1    | -0.004640086 | 6.326921453 | 0.887048901 |
| SYNCRIP   | 0.007569091  | 9.227753361 | 0.887101221 |
| WDR42C    | 0.003190594  | 6.007273593 | 0.887125082 |
| WDR76     | 0.003236589  | 5.958694507 | 0.887162842 |
| DIRC2     | -0.006275175 | 9.16450335  | 0.887295976 |
| LOC646853 | -0.004062878 | 6.489923372 | 0.88782476  |
| RRAGA     | 0.005854487  | 11.4942548  | 0.887904021 |
| HMGA2     | 0.002281283  | 6.138260039 | 0.887959906 |
| CTNS      | 0.005021499  | 6.891592107 | 0.887987176 |
| LOC652877 | 0.003714659  | 6.09830672  | 0.88816166  |
| FAM91A2   | 0.002336777  | 6.086849124 | 0.888395344 |

## DEG.infomation

|           |              |             |             |
|-----------|--------------|-------------|-------------|
| FAM12A    | -0.00404033  | 6.521167612 | 0.8884621   |
| CCNK      | 0.006241659  | 8.610318806 | 0.888508491 |
| SNAI3     | 0.004196686  | 6.192813752 | 0.888549194 |
| FBXW10    | -0.003677831 | 6.019722711 | 0.888554934 |
| NKAIN1    | -0.003655637 | 6.064151049 | 0.888587873 |
| SOX30     | 0.002903056  | 6.093044116 | 0.888636486 |
| SIDT2     | -0.010256027 | 8.889891639 | 0.888644017 |
| GABRA2    | 0.003510256  | 6.021357747 | 0.888679667 |
| C21ORF49  | -0.004456319 | 5.968395498 | 0.888746958 |
| STAC      | 0.004287204  | 6.170317776 | 0.888862373 |
| RHBDD2    | 0.005995935  | 9.479593246 | 0.88900525  |
| RBM12     | -0.004219125 | 7.783029    | 0.889027177 |
| PAX9      | -0.004027423 | 6.178453796 | 0.889080762 |
| LOC653686 | 0.003825447  | 5.931448227 | 0.88910517  |
| SPINT1    | 0.002871775  | 6.0078993   | 0.889122188 |
| PSMD11    | -0.006481966 | 6.731728883 | 0.889152947 |
| BPIL1     | 0.003754613  | 5.932545036 | 0.889310211 |
| OAS2      | -0.009904429 | 7.327663051 | 0.889353127 |
| ABCA12    | 0.003246036  | 6.138866685 | 0.889450263 |
| LOC651189 | 0.003558562  | 5.911928669 | 0.889457057 |
| LOC389722 | -0.003492843 | 6.115863283 | 0.889466006 |
| LOC645986 | -0.003638924 | 6.055195707 | 0.889490887 |
| INSL6     | -0.002505642 | 6.043871209 | 0.889575537 |
| CCDC61    | 0.005631746  | 6.161720564 | 0.889581795 |
| RFPL2     | -0.003857688 | 5.927891287 | 0.889589262 |
| LOC646331 | 0.003613108  | 6.077457467 | 0.889619428 |
| FAM152A   | -0.005149116 | 8.660383232 | 0.889716562 |
| LOC650087 | 0.003684868  | 6.206990076 | 0.889835547 |
| PGBD1     | -0.004911227 | 6.745453811 | 0.88990065  |
| ACCN3     | 0.003371082  | 6.607101243 | 0.889912453 |
| LOC650977 | 0.003409395  | 6.036615691 | 0.889914497 |
| FAM9B     | -0.002512168 | 5.994678951 | 0.889919084 |
| LOC645468 | 0.003254729  | 5.91125347  | 0.889954506 |
| LOC646050 | 0.003565344  | 6.001329826 | 0.889957522 |
| LOC645464 | -0.005089371 | 6.487585141 | 0.890002463 |
| OR52A4    | 0.003614595  | 6.02249667  | 0.890011497 |
| LOC645687 | 0.003993017  | 5.975085409 | 0.89008489  |
| LOC652655 | -0.003493455 | 5.996450274 | 0.890422618 |
| ZFYVE9    | -0.001894361 | 6.065027356 | 0.890548701 |
| LOC642214 | -0.003305307 | 6.060825204 | 0.890552873 |
| LOC340260 | -0.003160262 | 5.994396827 | 0.89063838  |
| LOC643712 | 0.003953087  | 6.375075172 | 0.890710192 |
| OR1B1     | 0.003335984  | 6.047043647 | 0.890836955 |
| SUSD5     | -0.004798323 | 6.326688535 | 0.890852433 |
| LOC642553 | 0.003459226  | 6.234307012 | 0.890922233 |
| LOC651907 | 0.003439055  | 6.037837892 | 0.890940467 |
| LOC649432 | -0.002827684 | 6.053366754 | 0.890984903 |
| LOC642244 | -0.003550514 | 6.053143433 | 0.890998451 |
| FLVCR1    | -0.0059913   | 6.867826129 | 0.891270297 |
| LOC401845 | 0.003376289  | 6.127225309 | 0.891274237 |
| LOC732393 | 0.002191563  | 6.077584375 | 0.891296651 |

## DEG.infomation

|                 |              |             |             |
|-----------------|--------------|-------------|-------------|
| TINAGL1         | -0.007542269 | 7.272697966 | 0.891333488 |
| DYNLRB2         | -0.00419114  | 6.541761171 | 0.891356392 |
| B4GALNT3        | 0.004633137  | 5.903014365 | 0.891377322 |
| TTY16           | -0.003465886 | 5.978613125 | 0.891429397 |
| ADCY6           | 0.009724484  | 8.685094568 | 0.891448955 |
| LOC652101       | 0.00313616   | 5.9919242   | 0.891457805 |
| SIRPB2          | 0.002846789  | 5.988508772 | 0.891470922 |
| VSTM1           | -0.003444224 | 6.031647007 | 0.891480166 |
| ESSPL           | 0.003025971  | 5.920835839 | 0.891502796 |
| LOC728343       | 0.00186362   | 6.087556943 | 0.891513167 |
| ANKHD1-EIF4EBP3 | 0.004572507  | 6.551921039 | 0.891731476 |
| C9ORF128        | 0.003561567  | 6.146528676 | 0.891756319 |
| POU4F1          | 0.003080345  | 5.989239235 | 0.891823997 |
| ADAMTS2         | 0.002891298  | 6.130845624 | 0.89190345  |
| MED12L          | 0.003453077  | 5.966647433 | 0.89192651  |
| PRDX5           | -0.005031634 | 12.31748172 | 0.89193649  |
| LOC401387       | 0.003713295  | 5.91426801  | 0.891976698 |
| ANGPT4          | 0.003653209  | 5.982506532 | 0.891982463 |
| LOC653464       | 0.002551302  | 6.167773902 | 0.892159508 |
| LOC646178       | -0.0041169   | 6.516967241 | 0.892198048 |
| CTSW            | 0.003696816  | 6.296422885 | 0.892262629 |
| MS4A5           | -0.004289178 | 5.956875017 | 0.892478487 |
| SLC7A13         | 0.003447951  | 5.944877311 | 0.892489506 |
| TAS1R2          | 0.002502264  | 6.052738945 | 0.89249952  |
| LOC646146       | -0.004221174 | 6.010683406 | 0.892552422 |
| FLJ20850        | 0.004451162  | 6.166088901 | 0.892562726 |
| CNGA4           | -0.002663117 | 6.063300765 | 0.892582038 |
| LOC121006       | -0.002626624 | 6.095623357 | 0.892640666 |
| LOC652733       | 0.004729756  | 6.297559544 | 0.892647739 |
| AP1S3           | 0.003508866  | 5.898704002 | 0.892662198 |
| MYH2            | -0.003586705 | 5.95325881  | 0.892694951 |
| MBNL1           | 0.00623184   | 8.915563073 | 0.892834254 |
| LIN7C           | 0.005911387  | 6.436878433 | 0.892841653 |
| LOC647862       | 0.003526823  | 6.108405392 | 0.893030676 |
| MAS1            | -0.003212756 | 6.044279688 | 0.893060168 |
| LOC643968       | 0.0031423    | 5.960660752 | 0.893248715 |
| NLN             | 0.004328999  | 6.433315728 | 0.893316215 |
| LOC286177       | 0.00322212   | 5.954256799 | 0.893453031 |
| MAGEB2          | 0.002697069  | 5.964978513 | 0.893583844 |
| RPGRIP1L        | -0.003717166 | 6.168564556 | 0.893682585 |
| LOC645203       | -0.003437322 | 5.95523396  | 0.893801173 |
| HIST1H1T        | 0.003036535  | 6.077741658 | 0.893815362 |
| LOC651100       | -0.00317154  | 6.054531284 | 0.893896737 |
| PLEKHG6         | 0.003204911  | 6.052178875 | 0.893906918 |
| LOC652629       | 0.00279234   | 6.021765892 | 0.894004649 |
| CDC25C          | -0.001943304 | 6.097564623 | 0.894183153 |
| ARHGAP22        | 0.006102735  | 6.915538391 | 0.89423228  |
| OR2T33          | -0.003111035 | 6.239525885 | 0.894455902 |
| LOC649470       | 0.003277103  | 5.988255491 | 0.89451752  |
| PPL             | -0.004583571 | 6.484901908 | 0.894525027 |
| GDA             | 0.002416834  | 6.031011791 | 0.894559282 |



## DEG.infomation

|           |              |             |             |
|-----------|--------------|-------------|-------------|
| UNQ9438   | 0.003656143  | 5.985380017 | 0.894705671 |
| ASB2      | 0.006918905  | 7.0130871   | 0.894782358 |
| LOC652258 | -0.003141215 | 6.044859175 | 0.894785952 |
| KRTAP5-1  | 0.004121485  | 6.12409555  | 0.894793707 |
| LOC729351 | 0.003671385  | 6.058836801 | 0.894845804 |
| HAPLN4    | -0.003785894 | 6.255154373 | 0.894938122 |
| TCP10     | 0.001899652  | 6.022724113 | 0.895019195 |
| DNA2      | -0.003410529 | 6.654097967 | 0.895130257 |
| LOC652625 | -0.00308388  | 5.999210964 | 0.895141662 |
| PRKD3     | -0.004206785 | 6.253787508 | 0.895169814 |
| KIAA0409  | -0.005991131 | 7.818287398 | 0.895188906 |
| LOC729162 | -0.003419905 | 6.256484203 | 0.895189092 |
| MCTP2     | 0.003580222  | 5.927450809 | 0.895257266 |
| LOC648672 | -0.003781211 | 6.037737481 | 0.895284617 |
| ACR       | 0.003377209  | 6.336742195 | 0.895344552 |
| LOC648815 | -0.005779971 | 6.019528589 | 0.895526909 |
| LOC374443 | 0.003382475  | 6.148446673 | 0.895541381 |
| SRC       | -0.00282952  | 6.441437804 | 0.895587792 |
| ZMYM6     | -0.004344148 | 7.708441442 | 0.895613518 |
| NHSL2     | 0.003359192  | 6.120243184 | 0.895665599 |
| H6PD      | -0.002958203 | 6.251648212 | 0.895790226 |
| FABP5L3   | 0.003349864  | 6.150347563 | 0.895929929 |
| DDX43     | 0.004086937  | 6.098111412 | 0.895949759 |
| LOC342541 | 0.003123518  | 6.033169733 | 0.896280295 |
| CDH26     | 0.002057517  | 6.149174227 | 0.896358042 |
| FLJ46906  | 0.004560669  | 6.333430787 | 0.896579992 |
| UBE2G2    | 0.008399566  | 8.695791003 | 0.896587098 |
| C4ORF15   | 0.0031736    | 6.19107717  | 0.896637093 |
| LOC650744 | 0.003586985  | 5.957552833 | 0.896666477 |
| NAT8B     | 0.00351071   | 6.198205039 | 0.896707145 |
| SLC25A41  | 0.003101866  | 5.992686649 | 0.896828454 |
| TARP      | -0.003333955 | 6.043780465 | 0.896838399 |
| GABRG2    | 0.002371716  | 6.024522581 | 0.896861697 |
| PRKCABP   | -0.004971564 | 6.793160422 | 0.896911283 |
| LOC647082 | -0.003172044 | 5.84490396  | 0.896927101 |
| GUCA2A    | 0.003725734  | 6.169177904 | 0.89700532  |
| LOC644055 | 0.002955987  | 6.255627408 | 0.897080826 |
| PPP2R4    | -0.00627089  | 8.491766488 | 0.897146273 |
| GEMIN4    | 0.005229688  | 8.700111094 | 0.897228344 |
| YTHDC2    | 0.004023405  | 6.593637316 | 0.897373106 |
| HRH3      | -0.003744625 | 6.028365862 | 0.897409301 |
| MAFA      | -0.009544035 | 7.303342571 | 0.897412035 |
| LOC643566 | 0.00349035   | 6.015469876 | 0.897454303 |
| GRM7      | 0.001972483  | 6.019105747 | 0.897468311 |
| LOC642976 | -0.002910828 | 5.993604551 | 0.897516506 |
| MBD3L1    | -0.003200744 | 5.956648884 | 0.897557368 |
| GNGT1     | 0.004021133  | 6.002197793 | 0.897562068 |
| LOC642009 | -0.002825014 | 5.959505294 | 0.897590821 |
| SNX24     | -0.005380586 | 6.820909256 | 0.89760873  |
| ATP8A1    | 0.002912063  | 6.200767705 | 0.897704633 |
| PLCB3     | -0.002917258 | 6.166521898 | 0.897732091 |

## DEG.infomation

|           |              |             |             |
|-----------|--------------|-------------|-------------|
| LOC285453 | 0.002965038  | 6.2984613   | 0.897822882 |
| HSP90B3P  | 0.002956205  | 6.020523791 | 0.897882881 |
| KIAA1787  | 0.004685054  | 6.993007096 | 0.897903338 |
| ZDHHC22   | -0.005257509 | 6.097459103 | 0.897926244 |
| FLJ40243  | 0.003471882  | 5.967024297 | 0.897934445 |
| LOC642269 | 0.002576699  | 6.12564968  | 0.897962015 |
| PIH1D1    | -0.005201391 | 7.553908375 | 0.898115778 |
| LOC442403 | -0.002977863 | 6.155371256 | 0.898279645 |
| BBOX1     | 0.003861014  | 6.04349904  | 0.898311214 |
| LOC652684 | -0.003059407 | 6.438183904 | 0.898427152 |
| SULT6B1   | -0.003857115 | 6.453609151 | 0.898436259 |
| LOC441005 | -0.002827858 | 6.019784135 | 0.898452855 |
| ZNF318    | 0.003670139  | 7.34615934  | 0.898570346 |
| LOC645961 | -0.003055035 | 6.279214472 | 0.898592897 |
| KIF27     | 0.001858132  | 6.103544213 | 0.898662586 |
| GPR176    | -0.003346401 | 6.273548735 | 0.898833486 |
| IL19      | -0.002381409 | 6.081433977 | 0.898965974 |
| ZNF782    | 0.003516918  | 6.036052982 | 0.898980627 |
| PHOX2B    | 0.002438657  | 6.116295661 | 0.899005645 |
| LOC348174 | 0.003460182  | 6.008496655 | 0.899114318 |
| LOC653184 | 0.002307975  | 6.125927152 | 0.899194207 |
| VSIG6     | -0.003266494 | 6.473619695 | 0.899289176 |
| AGBL2     | 0.003267756  | 6.070789961 | 0.89939505  |
| FLJ46257  | 0.003651964  | 5.961974898 | 0.899406532 |
| ZNF707    | 0.00333279   | 6.232741764 | 0.899409341 |
| LOC441424 | 0.003202306  | 5.827652333 | 0.899476732 |
| LOC647753 | 0.003307688  | 6.07841555  | 0.899577161 |
| CBL       | -0.004188705 | 6.655588822 | 0.899629589 |
| TMEM40    | 0.003745401  | 6.19609209  | 0.89965879  |
| ZNF560    | -0.002842958 | 6.055013592 | 0.89976444  |
| LOC653587 | -0.00338638  | 5.976878066 | 0.899789339 |
| LOC283514 | -0.002732898 | 6.095474697 | 0.899825149 |
| RASA3     | -0.003931536 | 6.646667278 | 0.899880482 |
| OR5V1     | 0.003300862  | 6.148524421 | 0.899889679 |
| LOC645558 | -0.002610723 | 6.308167823 | 0.899938975 |
| MTTP      | -0.005832735 | 6.367981311 | 0.9000666   |
| ZBTB40    | 0.005850893  | 7.745995928 | 0.900146086 |
| CT45-2    | 0.003490533  | 5.928223165 | 0.90018067  |
| LOC648612 | 0.002910739  | 6.013796732 | 0.900201196 |
| OR2J2     | 0.003381478  | 5.970572952 | 0.900229082 |
| LOC649279 | 0.002847435  | 6.082323713 | 0.900280584 |
| SLC17A3   | -0.003321205 | 6.351110671 | 0.900363539 |
| LOC653160 | 0.003319605  | 6.096506788 | 0.900411033 |
| CD151     | 0.006266406  | 11.52491453 | 0.9005378   |
| LOC642622 | 0.003264701  | 6.091021242 | 0.900609782 |
| RUFY4     | -0.003352942 | 6.158838965 | 0.900620606 |
| PLG       | -0.002885406 | 5.964732961 | 0.900731699 |
| MYO18B    | 0.006938858  | 7.632818226 | 0.900809318 |
| KIAA1245  | -0.001326537 | 6.075296075 | 0.900848    |
| LOC728637 | 0.002902916  | 6.037435338 | 0.901049135 |
| FAM71F1   | -0.002802839 | 5.990626196 | 0.90106508  |

## DEG.infomation

|           |              |             |             |
|-----------|--------------|-------------|-------------|
| KISS1     | 0.003272069  | 6.086777782 | 0.901077859 |
| LOC643274 | -0.003146994 | 6.205762606 | 0.901079392 |
| FAM128B   | 0.005286541  | 5.997747624 | 0.901238524 |
| OR51G2    | 0.003788819  | 5.962104665 | 0.901253239 |
| OR2G2     | -0.003226301 | 5.978738013 | 0.901299158 |
| KIAA0319  | 0.003242167  | 5.893637613 | 0.901351949 |
| TMEM173   | 0.007074326  | 9.237937422 | 0.901369818 |
| OR4N4     | -0.003187776 | 6.007791004 | 0.901409575 |
| OR2A7     | -0.002463222 | 5.978494384 | 0.901423631 |
| NEUROG3   | -0.003209403 | 6.01412781  | 0.90145931  |
| OR2L8     | 0.003217677  | 6.014123427 | 0.901589136 |
| LOC643386 | -0.003291229 | 5.949175396 | 0.901589934 |
| FLJ25770  | -0.003673729 | 5.92589163  | 0.901667872 |
| BARHL2    | 0.003906944  | 6.134550851 | 0.901709245 |
| LOC440389 | 0.002988852  | 6.239873585 | 0.901743124 |
| CYP2B6    | -0.002206547 | 6.017300629 | 0.901745109 |
| LOC441320 | -0.002940872 | 6.005784567 | 0.90185288  |
| PDILT     | -0.00289669  | 5.969846261 | 0.902005019 |
| C6ORF182  | 0.003211429  | 6.213452007 | 0.902039327 |
| FAM120A   | -0.008057735 | 11.11886497 | 0.902056743 |
| FLJ45121  | 0.002914358  | 6.055996057 | 0.902081121 |
| AMN       | 0.003031022  | 6.082743824 | 0.902118077 |
| ULK3      | -0.004162239 | 6.810160842 | 0.902139185 |
| LOC650174 | -0.002610895 | 6.091846135 | 0.902235612 |
| SYCP2     | -0.002353505 | 6.217078234 | 0.902252485 |
| LOC649745 | -0.002738176 | 6.108368312 | 0.902264278 |
| LOC654055 | 0.00284665   | 6.13285285  | 0.902277373 |
| LOC389043 | -0.002010438 | 5.999612866 | 0.90241983  |
| XKR5      | 0.003465741  | 6.051456842 | 0.902514079 |
| LOC401358 | 0.0030578    | 6.052928443 | 0.902529048 |
| FOXD4     | -0.002801983 | 6.571822808 | 0.902795349 |
| LOC651131 | -0.002622913 | 6.045726493 | 0.902799351 |
| LOC651961 | 0.003054346  | 5.853416631 | 0.902903774 |
| LOC652887 | 0.003245079  | 6.254813335 | 0.902998103 |
| LOC650739 | -0.002565853 | 6.073250517 | 0.90301935  |
| LOC649701 | 0.003019074  | 6.033837491 | 0.903021319 |
| PRR10     | 0.003296896  | 5.952661728 | 0.903099381 |
| LOC649897 | 0.003885704  | 6.679095534 | 0.903166028 |
| LOC645870 | 0.002917885  | 5.946879984 | 0.903184849 |
| CLIC2     | -0.006092023 | 6.836349732 | 0.903267172 |
| LYAR      | 0.010214591  | 8.504247684 | 0.903272397 |
| GTPBP5    | 0.004007009  | 6.379703577 | 0.903432492 |
| LOC390760 | 0.003156104  | 5.983744995 | 0.903488246 |
| C11ORF37  | 0.00327544   | 5.972167949 | 0.903668075 |
| C9ORF41   | -0.00241303  | 6.114957363 | 0.903807936 |
| MDH1B     | 0.003078689  | 6.152293656 | 0.903833513 |
| ZC3HAV1L  | -0.002670952 | 6.234010412 | 0.903876964 |
| LOC653541 | 0.003406071  | 6.083914422 | 0.903889428 |
| PHYHIP    | 0.003356579  | 6.668837981 | 0.903903562 |
| STAT4     | 0.017798002  | 6.963426481 | 0.903971521 |
| FOLH1     | -0.002504505 | 6.290496156 | 0.903984312 |

## DEG.infomation

|               |              |             |             |
|---------------|--------------|-------------|-------------|
| PGDS          | 0.002785728  | 6.042669465 | 0.904010442 |
| CD3D          | 0.003582723  | 6.222705481 | 0.904042911 |
| DKFZP667M2411 | -0.003164154 | 6.464426594 | 0.904116693 |
| FAM41C        | 0.002759853  | 6.107594984 | 0.904229061 |
| ZNF708        | 0.003782383  | 6.03016491  | 0.904434811 |
| TMEM201       | 0.003565703  | 6.814569746 | 0.904442049 |
| RBP2          | -0.003248748 | 6.199228096 | 0.904462183 |
| LOC340527     | 0.002281576  | 6.042191787 | 0.904532242 |
| STAB2         | 0.003227678  | 5.994201301 | 0.904532977 |
| TMEM181       | -0.005982546 | 9.313395082 | 0.904632974 |
| LOC641939     | 0.003528924  | 6.175632588 | 0.904654006 |
| LOC389633     | -0.003277005 | 5.990227524 | 0.904761199 |
| LOC388938     | 0.003958654  | 6.021602332 | 0.904764554 |
| THRB          | -0.003373079 | 5.986812532 | 0.904828428 |
| LOC388397     | -0.00328548  | 6.490369306 | 0.904833335 |
| NDUFA10       | 0.008518996  | 9.560883748 | 0.904866142 |
| LOC649707     | 0.002998397  | 6.122161288 | 0.904887116 |
| CENPH         | 0.002345124  | 6.207039424 | 0.904912993 |
| PSMD7         | -0.00723257  | 10.76578491 | 0.904923003 |
| LOC391555     | 0.00303594   | 6.102280637 | 0.905028871 |
| CT45-5        | 0.001785677  | 5.994984767 | 0.905051802 |
| ALKBH4        | -0.003656619 | 6.494489058 | 0.905060973 |
| LOC643009     | -0.004533061 | 5.943965577 | 0.905323762 |
| TBC1D10C      | -0.003624898 | 6.277303892 | 0.905333996 |
| TRAP1         | 0.005051784  | 8.929236244 | 0.905425276 |
| LOC649584     | 0.002768273  | 6.080819321 | 0.905465466 |
| LOC283951     | -0.007040336 | 8.118267173 | 0.905570485 |
| ECH1          | -0.007927811 | 12.46049766 | 0.905583101 |
| CNTNAP4       | -0.002156775 | 6.10882665  | 0.905894308 |
| LOC389000     | -0.004018131 | 5.945047236 | 0.905938859 |
| LOC642516     | 0.00271243   | 6.001803771 | 0.905945727 |
| TTY2          | 0.001640699  | 6.036663667 | 0.905961395 |
| DGAT2L4       | -0.002976425 | 6.065485387 | 0.90606839  |
| S100Z         | -0.002195239 | 6.002563758 | 0.906093357 |
| EXOC8         | 0.004903411  | 6.417814707 | 0.906346298 |
| AKAP4         | 0.001955227  | 6.154434911 | 0.90641107  |
| F11           | -0.002143684 | 6.138041841 | 0.906618345 |
| LOC440402     | 0.003125538  | 5.998559625 | 0.906685994 |
| FLJ35894      | -0.002805343 | 5.954586634 | 0.906727809 |
| KCNH5         | -0.002369186 | 6.016394895 | 0.906914222 |
| ZNF79         | 0.00407558   | 6.234939355 | 0.907021621 |
| IKZF3         | 0.002771913  | 6.34096063  | 0.907074402 |
| A3GALT2       | -0.002366481 | 5.989230817 | 0.907092153 |
| LOC388114     | 0.003136504  | 6.043552678 | 0.907130717 |
| DHX57         | -0.001756137 | 6.132477438 | 0.907154919 |
| C20ORF179     | 0.003146568  | 6.008779038 | 0.907213621 |
| SELP          | -0.005001697 | 6.478739801 | 0.907369545 |
| TMEM167A      | -0.00739935  | 7.11373227  | 0.907429956 |
| LOC651400     | -0.002743863 | 6.009443471 | 0.907594651 |
| KRT18         | 0.002523964  | 6.135411484 | 0.90767025  |
| RCS1          | 0.003924715  | 7.982036312 | 0.907726879 |

## DEG.infomation

|           |              |             |             |
|-----------|--------------|-------------|-------------|
| TMEM185B  | 0.004821808  | 7.828701682 | 0.908018626 |
| LOC646046 | 0.004424844  | 6.102224853 | 0.908052554 |
| LOC645418 | -0.002929593 | 5.943687928 | 0.908276735 |
| FLJ35767  | -0.003086089 | 6.119829918 | 0.908390099 |
| KIAA0182  | 0.005585447  | 8.73544801  | 0.908540819 |
| TLR9      | -0.002972393 | 6.097997148 | 0.908697033 |
| FLJ22184  | -0.002116294 | 6.106131585 | 0.908741937 |
| MSGN1     | 0.003641096  | 6.011705905 | 0.908776937 |
| OR8D4     | -0.003131744 | 6.041385822 | 0.908792012 |
| MAGEE2    | -0.002934919 | 5.985954556 | 0.908847773 |
| LOC644824 | 0.002537228  | 6.066387252 | 0.908941125 |
| KCNJ1     | 0.001811978  | 6.052612133 | 0.909027262 |
| LOC728670 | -0.003088968 | 6.183041892 | 0.909074915 |
| UCHL5     | -0.005269446 | 8.175685792 | 0.90915167  |
| LOC643493 | 0.002821611  | 6.207454378 | 0.909237349 |
| XIAP      | 0.0043461    | 6.531237967 | 0.909306358 |
| HS3ST1    | 0.004910362  | 6.37269806  | 0.909350062 |
| MORC1     | -0.002669406 | 5.995744722 | 0.90940444  |
| LOC642243 | 0.003759379  | 6.236075315 | 0.909499536 |
| SEC63     | 0.003514248  | 6.436701295 | 0.909505753 |
| CA10      | 0.002866081  | 6.06567203  | 0.90954867  |
| DAGLA     | 0.0038649    | 6.637891977 | 0.909618276 |
| LOC652811 | 0.002989043  | 5.986230953 | 0.909645765 |
| HAND1     | 0.007609379  | 10.83307111 | 0.909850633 |
| COG5      | 0.006586074  | 7.753013076 | 0.910012333 |
| LOC645733 | 0.002969642  | 6.013739523 | 0.910031816 |
| P2RY13    | 0.002234523  | 6.272789417 | 0.910254352 |
| LOC643807 | -0.002766667 | 6.104942967 | 0.910289331 |
| FXYD3     | -0.001697204 | 6.015420735 | 0.910329626 |
| LOC649415 | -0.002797405 | 6.009460462 | 0.91033051  |
| FBXO7     | -0.00283086  | 5.912128512 | 0.910417517 |
| GTF3C5    | -0.006351652 | 8.172215836 | 0.910446613 |
| LOC651900 | 0.002571631  | 6.035173268 | 0.910527789 |
| LOC644093 | 0.002385571  | 6.287049844 | 0.910551939 |
| SNORD15B  | -0.002986884 | 6.184493636 | 0.910625416 |
| LOC727737 | 0.002750218  | 6.243387099 | 0.910691486 |
| LOC388931 | 0.00201053   | 6.043974689 | 0.910715401 |
| LOC644386 | -0.002466186 | 6.043237401 | 0.910814903 |
| FLJ32011  | -0.003655915 | 6.350710795 | 0.910887984 |
| CCDC116   | -0.002936838 | 6.193546015 | 0.910923094 |
| C14ORF148 | 0.002967819  | 5.994449463 | 0.911134212 |
| LOC645557 | -0.003332874 | 5.876815491 | 0.911163225 |
| PJCG6     | -0.003054848 | 6.205550461 | 0.911347049 |
| LOC646703 | 0.002877585  | 6.181495128 | 0.911379972 |
| OR5H14    | 0.003034089  | 5.853108305 | 0.911492622 |
| LOC652252 | -0.002952413 | 5.998207522 | 0.911511688 |
| LOC651568 | -0.003046685 | 6.010013954 | 0.911523659 |
| RNASE7    | -0.002949741 | 5.953867721 | 0.911603728 |
| LOC649979 | -0.002542249 | 6.021126558 | 0.911652378 |
| TTC15     | -0.006377326 | 9.685957258 | 0.911722669 |
| LOC647102 | 0.003574912  | 6.15118078  | 0.911867588 |

## DEG.infomation

|           |              |             |             |
|-----------|--------------|-------------|-------------|
| C6ORF167  | 0.003120209  | 6.185835799 | 0.91195092  |
| RIBC1     | 0.003126341  | 6.13511733  | 0.911964351 |
| LOC653113 | 0.002825987  | 6.339597448 | 0.911965052 |
| EPHB1     | 0.00304604   | 6.215981759 | 0.9120027   |
| LOC642276 | 0.003408426  | 5.997634786 | 0.912005533 |
| NPCDR1    | 0.002496447  | 6.277332957 | 0.912093228 |
| PCDH11Y   | 0.001754085  | 5.924344884 | 0.912169689 |
| LOC642571 | -0.002777488 | 6.036657027 | 0.912187327 |
| PNPLA3    | -0.002455747 | 5.998177264 | 0.912229999 |
| KIAA1841  | -0.002743732 | 5.799107304 | 0.912368942 |
| OR52L1    | -0.002713852 | 6.051797053 | 0.912531338 |
| C11ORF59  | -0.006022284 | 10.26475681 | 0.912542729 |
| LOC649652 | 0.002950969  | 6.078370759 | 0.912554549 |
| LOC645942 | 0.003094362  | 6.286481348 | 0.912675014 |
| LOC652646 | -0.002588338 | 6.11282915  | 0.912698943 |
| PHF20     | -0.004695296 | 7.357805642 | 0.91271841  |
| LOC647654 | -0.003119768 | 6.185122672 | 0.91273208  |
| FAM175B   | 0.003902495  | 8.947495134 | 0.912798618 |
| GALP      | -0.002790617 | 5.955876481 | 0.912831865 |
| LOC653486 | 0.002915673  | 6.031920964 | 0.91289588  |
| FGG       | 0.001876908  | 5.987410901 | 0.913074139 |
| REXO1L1   | -0.003221228 | 5.968018699 | 0.913093285 |
| LOC402643 | 0.002745365  | 5.940046734 | 0.913204667 |
| DNHD2     | 0.002977432  | 6.025492305 | 0.913289803 |
| GOLT1A    | -0.003135947 | 5.920039886 | 0.913338558 |
| GPX6      | -0.003290686 | 6.258001158 | 0.913342775 |
| IL1F10    | 0.002087066  | 6.010090953 | 0.913428258 |
| LOC649371 | -0.00200571  | 6.062997098 | 0.913444637 |
| LOC729444 | -0.001639527 | 6.020924187 | 0.913519065 |
| BCYRN1    | -0.008357632 | 9.864324915 | 0.913585385 |
| SERF2     | 0.005663988  | 12.17112907 | 0.913596248 |
| DDX6      | 0.003469019  | 6.186536695 | 0.913909027 |
| SLC28A3   | 0.002636833  | 6.048551748 | 0.91396209  |
| ABLIM2    | -0.008511248 | 8.104624139 | 0.913989963 |
| LOC647558 | 0.002196349  | 6.043093621 | 0.91399176  |
| LAX1      | -0.002930011 | 6.337953866 | 0.914011267 |
| DDT       | -0.006854305 | 11.34380136 | 0.914018556 |
| LOC654222 | -0.003072136 | 5.980062462 | 0.914053959 |
| C8ORF79   | 0.002372336  | 6.203211651 | 0.914106186 |
| LOC442517 | -0.002834885 | 6.180009911 | 0.914212991 |
| LOC120364 | 0.00300807   | 6.16691613  | 0.91428679  |
| NKX2-1    | -0.001826422 | 5.962503513 | 0.914488545 |
| OR4M1     | -0.001762367 | 6.101514254 | 0.914559998 |
| LOC441436 | 0.002937237  | 6.012314024 | 0.914600865 |
| FBXO42    | 0.005671324  | 6.150234005 | 0.914624758 |
| POMT2     | -0.004398835 | 6.972816036 | 0.914697303 |
| TMEM132D  | -0.002551599 | 5.984083315 | 0.914729087 |
| RERG      | 0.004344024  | 6.888131401 | 0.91476683  |
| FLJ40194  | 0.002993254  | 6.076628995 | 0.914897797 |
| GABRR2    | -0.00271476  | 5.930823317 | 0.914963531 |
| UBE2D4    | 0.005341236  | 9.255752487 | 0.914972189 |

## DEG.infomation

|           |              |             |             |
|-----------|--------------|-------------|-------------|
| KLK10     | 0.002147327  | 6.140292697 | 0.915087616 |
| LOC392713 | 0.002478684  | 6.239789905 | 0.915122874 |
| GPHA2     | 0.003653206  | 6.073746338 | 0.915307912 |
| SURF2     | -0.003319195 | 6.606127523 | 0.91543444  |
| C4BPA     | -0.002823948 | 5.961717617 | 0.915457268 |
| OVCA2     | -0.004942436 | 6.193978943 | 0.915477273 |
| LOC644303 | -0.003014686 | 5.908616479 | 0.915592832 |
| HSPH1     | -0.008833186 | 9.849213435 | 0.915688462 |
| PRMT6     | 0.004079864  | 6.968820413 | 0.915750595 |
| LOC648358 | 0.002573375  | 6.077184333 | 0.915784557 |
| CDK4      | 0.004645374  | 9.266630675 | 0.915785647 |
| LOC652588 | -0.00291144  | 5.9574182   | 0.915863545 |
| LOC644951 | -0.002441731 | 6.062149793 | 0.915915425 |
| LOC728032 | -0.002644152 | 6.042719293 | 0.916084733 |
| LOC731085 | 0.003300609  | 5.923276654 | 0.916124215 |
| HIST1H2AK | 0.002800963  | 6.113170669 | 0.916268818 |
| LOC643752 | 0.002633766  | 5.963140184 | 0.916306253 |
| DNPEP     | -0.007679102 | 7.22014324  | 0.916333049 |
| LOC649075 | -0.002495725 | 6.136133588 | 0.916396063 |
| HNRPDL    | -0.003560427 | 8.798032778 | 0.916498999 |
| PPY2      | -0.003479577 | 5.916259652 | 0.916548631 |
| HRASLS2   | -0.004326872 | 6.053372677 | 0.916627722 |
| LOC728119 | -0.002512577 | 6.137115582 | 0.916784221 |
| FBXW4     | 0.00606507   | 9.318333475 | 0.916819152 |
| FKBP7     | -0.001882082 | 6.103834502 | 0.916832408 |
| SLC22A12  | 0.001872237  | 6.034101566 | 0.916904734 |
| H1FOO     | 0.002458432  | 5.996272115 | 0.91692506  |
| CHP2      | 0.002954468  | 6.099817016 | 0.917047094 |
| LOC402665 | 0.003047015  | 6.013573796 | 0.917174281 |
| CCDC4     | 0.001892337  | 6.234093332 | 0.917223066 |
| LOC644573 | 0.002624826  | 5.95769677  | 0.917319391 |
| WNT8B     | -0.003104906 | 5.972401693 | 0.917325814 |
| TTY4      | 0.003207699  | 5.892912844 | 0.917340291 |
| NOXA1     | 0.004484624  | 6.706134654 | 0.917542438 |
| LOC644968 | 0.002234769  | 6.078282834 | 0.917616568 |
| PIP5K1A   | 0.004140827  | 6.794756279 | 0.917676353 |
| LOC652349 | 0.002591138  | 6.124731108 | 0.917706803 |
| OR10G9    | 0.002654114  | 5.994399333 | 0.917736364 |
| CACNG5    | 0.001887575  | 6.058230484 | 0.917793487 |
| LOC648000 | 0.005245789  | 12.2042365  | 0.917868765 |
| LOC644021 | -0.00252108  | 6.101112394 | 0.917936957 |
| EDC4      | -0.00364734  | 8.998404117 | 0.918060533 |
| EIF2C1    | 0.003255058  | 7.583590538 | 0.918095392 |
| GPC5      | -0.004408754 | 6.347932716 | 0.918141041 |
| NRN1      | 0.00504912   | 6.264764776 | 0.918153575 |
| RPS26L    | -0.007210862 | 11.80426529 | 0.918260952 |
| LOC161527 | -0.002996205 | 6.809259769 | 0.918344995 |
| LOC653427 | 0.002743302  | 6.099913443 | 0.918425926 |
| LOC642902 | 0.002349117  | 5.984187156 | 0.918439143 |
| LOC642628 | -0.002628715 | 5.935687358 | 0.918501236 |
| MPN2      | -0.002776723 | 5.966261885 | 0.918598632 |

## DEG.infomation

|           |              |             |             |
|-----------|--------------|-------------|-------------|
| C12ORF50  | 0.00185585   | 6.045577585 | 0.918645529 |
| STRADA    | -0.003358117 | 7.295351145 | 0.918712047 |
| OR4M2     | -0.001722692 | 6.003200062 | 0.918721991 |
| TRPC4     | -0.003312082 | 6.287681912 | 0.918728358 |
| CCDC27    | 0.002839521  | 6.292211186 | 0.919021114 |
| MCAT      | 0.003035505  | 6.886333438 | 0.919059679 |
| GPR78     | 0.002510918  | 6.186238516 | 0.919074221 |
| LOC389333 | -0.002754271 | 5.998441864 | 0.919078348 |
| LOC641518 | -0.002665879 | 6.007118358 | 0.919081494 |
| OR1J4     | 0.002399066  | 6.139500232 | 0.91910689  |
| CALCR     | 0.002385076  | 6.047056481 | 0.919136121 |
| TOR1A     | 0.005458546  | 7.311463348 | 0.919221729 |
| LOC391033 | -0.002510785 | 6.17890667  | 0.919253838 |
| SRY       | -0.002140434 | 6.123818177 | 0.919296488 |
| TENC1     | 0.002448289  | 6.549110041 | 0.919307691 |
| CTSL3     | 0.003046562  | 6.162937524 | 0.91938195  |
| OR8J1     | -0.001779199 | 6.032501883 | 0.919393117 |
| GPR18     | -0.002543907 | 5.998616927 | 0.919394199 |
| LOC653652 | 0.003503641  | 5.953434181 | 0.919443841 |
| CST4      | 0.001867209  | 6.048044766 | 0.919495086 |
| GBP6      | -0.002206262 | 6.096427502 | 0.919526338 |
| LOC649030 | 0.002442808  | 6.200047788 | 0.919610134 |
| LOC286478 | -0.002759996 | 6.072049845 | 0.91965564  |
| LOC728241 | 0.002519113  | 6.125902932 | 0.919885581 |
| LOC284009 | 0.002878032  | 5.910023765 | 0.920091974 |
| DDX10     | 0.003891819  | 7.946706427 | 0.920131923 |
| LOC388910 | 0.002722177  | 5.91018462  | 0.92025249  |
| KIAA1026  | -0.001391738 | 6.20543287  | 0.920289683 |
| LOC137107 | 0.004320357  | 6.520695715 | 0.920300502 |
| ARID3C    | -0.002639982 | 6.105372382 | 0.920305517 |
| LOC644917 | -0.002772516 | 6.068067084 | 0.920395804 |
| LOC645581 | 0.001888078  | 6.026976101 | 0.920526462 |
| PSG9      | -0.002571883 | 5.979310185 | 0.920593343 |
| POLH      | -0.002015051 | 6.209717116 | 0.920623112 |
| EXOSC2    | 0.003702519  | 7.746880393 | 0.920631643 |
| LOC649613 | -0.002341536 | 6.096593451 | 0.920689795 |
| FLJ36701  | 0.002455863  | 6.012683877 | 0.92083199  |
| HBD       | -0.002512436 | 5.99845908  | 0.920856562 |
| LOC649542 | -0.002594364 | 6.144487454 | 0.920877367 |
| LOC645722 | 0.003728328  | 6.445804128 | 0.920894629 |
| LOC649593 | -0.002365393 | 6.038217043 | 0.92089937  |
| FUT9      | 0.001678234  | 5.902651146 | 0.920910653 |
| HIST1H2AG | 0.00194118   | 6.015744514 | 0.920966625 |
| ATAD5     | -0.002265072 | 5.9933307   | 0.921068367 |
| LOC644229 | -0.002421896 | 6.042752638 | 0.921074661 |
| ATP8A2    | 0.002539194  | 6.366175069 | 0.921131202 |
| PORCN     | -0.002997838 | 6.540084583 | 0.921196786 |
| LOC653193 | -0.002443132 | 6.003784917 | 0.921417253 |
| MYADML    | 0.002762386  | 6.11069279  | 0.92159947  |
| MTNR1B    | -0.002803827 | 6.085914002 | 0.921633467 |
| TRIM59    | -0.002675359 | 5.876595634 | 0.921664627 |



## DEG.infomation

|           |              |             |             |
|-----------|--------------|-------------|-------------|
| CYP26A1   | 0.001406341  | 6.101920633 | 0.921670103 |
| FLJ23356  | -0.002773287 | 6.017221199 | 0.921699501 |
| C11ORF35  | -0.002461398 | 6.027869394 | 0.921700702 |
| ACSM2B    | 0.001373112  | 6.083011517 | 0.92175126  |
| LOC645335 | -0.002606305 | 5.952373111 | 0.921794164 |
| DHCR24    | -0.007410415 | 6.937013169 | 0.92184923  |
| FSHR      | -0.001956133 | 6.015869923 | 0.921906444 |
| LOC646713 | 0.002239942  | 6.180862664 | 0.921932784 |
| STX1B     | -0.002501703 | 5.984403541 | 0.921988172 |
| FLJ44006  | 0.002437681  | 5.992876729 | 0.92201178  |
| LOC645723 | 0.002650465  | 6.269437058 | 0.922127646 |
| TUBA4     | 0.002630065  | 5.917085763 | 0.922183635 |
| LOC284912 | 0.002638053  | 6.165480248 | 0.922188293 |
| LOC652864 | -0.006625312 | 8.655678538 | 0.922211163 |
| CFHR3     | 0.001983579  | 6.021572784 | 0.922234198 |
| LOC389362 | 0.002333774  | 5.898684671 | 0.922296373 |
| FOXL2     | -0.001375648 | 5.990842314 | 0.922409415 |
| BBS7      | 0.001903144  | 6.390311465 | 0.922500953 |
| AIFM3     | -0.003762686 | 6.052761144 | 0.922511526 |
| KCNK7     | 0.001947511  | 6.144569214 | 0.922521822 |
| LOC440585 | -0.002568399 | 6.030088811 | 0.922607642 |
| LOC440280 | -0.003413744 | 6.749001282 | 0.922701676 |
| LOC643836 | 0.001920794  | 6.115809851 | 0.922849187 |
| FLJ36031  | 0.00257547   | 5.992027642 | 0.92290094  |
| DNAJC6    | -0.002040838 | 6.07382938  | 0.922968159 |
| OR10A4    | -0.002721604 | 5.930996677 | 0.922997267 |
| LOC652585 | 0.002473734  | 6.036104795 | 0.923078666 |
| LOC649181 | -0.002461215 | 6.046240531 | 0.923101801 |
| LOC648230 | -0.002210121 | 6.065845263 | 0.923184444 |
| LOC402382 | -0.002208361 | 6.117284017 | 0.923346552 |
| ZNF765    | -0.002321211 | 5.902780383 | 0.923445393 |
| FAM19A2   | 0.001594782  | 6.089072555 | 0.923451547 |
| LOC652000 | -0.002685189 | 5.894767899 | 0.923492637 |
| LOC643191 | -0.002388463 | 5.906925531 | 0.923511508 |
| LOC391761 | -0.002533573 | 5.987352911 | 0.923543126 |
| LOC644922 | -0.002769625 | 6.077259093 | 0.923545424 |
| CFDP1     | -0.007583298 | 7.326408699 | 0.923654646 |
| ZBTB2     | -0.00277261  | 6.312665936 | 0.923711634 |
| MITD1     | 0.003969578  | 7.855479118 | 0.923715865 |
| CDH3      | -0.002278102 | 6.015511399 | 0.924161665 |
| LOC57399  | -0.00244788  | 6.091951419 | 0.92432513  |
| GOLT1B    | 0.006195093  | 7.206004308 | 0.924408701 |
| TCL1B     | 0.002030369  | 6.102460252 | 0.924467129 |
| C9ORF75   | 0.00436838   | 6.583386842 | 0.924478069 |
| ARID3B    | -0.003775328 | 7.042500035 | 0.924553987 |
| DMRT2     | 0.001886783  | 6.097719553 | 0.924621237 |
| PRSS16    | 0.002621225  | 5.898377526 | 0.924629496 |
| LRP5L     | 0.004141509  | 7.229486545 | 0.924887677 |
| C1ORF167  | 0.003044633  | 6.100916538 | 0.924898247 |
| TMPRSS2   | 0.002585592  | 5.970890719 | 0.925122853 |
| OR6C75    | 0.002299242  | 6.030339207 | 0.925250353 |

## DEG.infomation

|           |              |             |             |
|-----------|--------------|-------------|-------------|
| LOC644341 | 0.002152203  | 6.025715157 | 0.925311462 |
| C6ORF126  | 0.002421166  | 6.029659956 | 0.925324889 |
| LOC731658 | 0.002489225  | 6.03850735  | 0.925383237 |
| CALR3     | 0.002109411  | 6.032348828 | 0.925554088 |
| LOC402573 | 0.002668079  | 5.930912586 | 0.925722126 |
| SFXN1     | -0.004216823 | 7.303051562 | 0.925725631 |
| SORL1     | -0.003390909 | 6.571095653 | 0.925799059 |
| AGAP7     | -0.003348503 | 6.180672766 | 0.925883335 |
| PRR18     | -0.0022632   | 6.253755709 | 0.925890335 |
| LOC644391 | 0.002533647  | 6.330130416 | 0.925941276 |
| LOC645812 | 0.002390383  | 6.098610511 | 0.925965802 |
| LOC652383 | -0.002494299 | 5.963882819 | 0.926062386 |
| LOC128102 | -0.002096229 | 5.927947854 | 0.926204781 |
| LOC154872 | -0.002048623 | 5.94331382  | 0.926256136 |
| C1ORF127  | 0.004177176  | 6.024412205 | 0.926262595 |
| PAGE2     | -0.002380615 | 5.966388733 | 0.92628211  |
| MED29     | 0.005983283  | 7.808926809 | 0.926481701 |
| LOC650933 | -0.002274975 | 6.243714132 | 0.926697647 |
| CLDN7     | -0.002249776 | 6.159412383 | 0.926868202 |
| LOC647479 | 0.002002558  | 6.001245758 | 0.926972639 |
| SCGB2A1   | -0.002254927 | 6.012342977 | 0.926987806 |
| LOC645843 | -0.002348742 | 6.028999444 | 0.927065412 |
| LOC642548 | -0.002832025 | 6.180627219 | 0.92723729  |
| LOC642220 | 0.002365903  | 6.106823482 | 0.92729815  |
| LOC647942 | -0.002419465 | 6.172279705 | 0.927323041 |
| PSKH2     | 0.002285995  | 5.86828617  | 0.927323155 |
| C11ORF55  | 0.002117313  | 6.122834963 | 0.927355564 |
| LOC642101 | 0.002529273  | 5.996492534 | 0.927376876 |
| RPS4Y2    | 0.01363653   | 7.506693755 | 0.92744305  |
| MAPBPIP   | 0.004972629  | 9.572090839 | 0.927565903 |
| ZNF398    | 0.002161638  | 6.703292826 | 0.927644526 |
| C1ORF95   | 0.00302191   | 5.945125089 | 0.927691978 |
| KRT40     | 0.002790495  | 5.826037298 | 0.927845112 |
| HIST1H4B  | 0.002248465  | 6.112705731 | 0.927868452 |
| GPR31     | -0.00246577  | 5.954927045 | 0.927909251 |
| LOC441097 | -0.002214279 | 6.027557253 | 0.927941834 |
| HOXD8     | 0.002381291  | 6.090141335 | 0.928025714 |
| LOC645660 | 0.002131679  | 6.082506901 | 0.928193201 |
| TRIM17    | 0.001881691  | 6.176314638 | 0.928349848 |
| FADS6     | 0.003549705  | 6.021936589 | 0.928391572 |
| MC4R      | 0.002079419  | 5.995217668 | 0.928428685 |
| FLJ00312  | 0.001136084  | 6.05382505  | 0.92852272  |
| LOC646424 | -0.002402062 | 5.891401092 | 0.92856073  |
| LOC131055 | 0.002464122  | 6.007389988 | 0.928652711 |
| CTNNA1    | 0.002587173  | 11.73090963 | 0.928821906 |
| AP3B2     | 0.002611776  | 5.953935586 | 0.928868814 |
| LOC644152 | 0.00209157   | 6.075547056 | 0.929033263 |
| LOC646915 | -0.002133618 | 6.262405154 | 0.929147581 |
| LOC649167 | 0.00219696   | 6.023641545 | 0.929203255 |
| SLC37A2   | 0.002461557  | 5.87444961  | 0.929345443 |
| LOC643755 | -0.002000284 | 6.105327209 | 0.929354865 |

## DEG.infomation

|           |              |             |             |
|-----------|--------------|-------------|-------------|
| LOC146053 | -0.002325127 | 6.163274402 | 0.929379065 |
| LRRC16    | 0.003841034  | 6.536996734 | 0.929436698 |
| CCDC73    | -0.002104684 | 5.977749302 | 0.92950487  |
| BNC1      | -0.001083361 | 6.06109481  | 0.929523885 |
| LOC650195 | 0.002551125  | 5.990809818 | 0.929541377 |
| LOC644064 | -0.002358382 | 6.079008383 | 0.929556976 |
| ZC3HC1    | 0.003724415  | 9.806750985 | 0.929582443 |
| LOC643879 | -0.002219503 | 6.023305255 | 0.929728274 |
| LOC645359 | 0.002916084  | 5.966297942 | 0.929882862 |
| LOC652427 | 0.002232912  | 6.312305543 | 0.929929624 |
| LOC646951 | -0.001538527 | 6.027591046 | 0.929989889 |
| CBLL1     | 0.00398806   | 7.466144405 | 0.930034116 |
| OLFM2     | -0.003033229 | 5.965782979 | 0.930079499 |
| LOC643081 | 0.00223981   | 5.938349245 | 0.930155977 |
| ATP12A    | 0.002413167  | 6.159384977 | 0.930163726 |
| CCDC52    | 0.002229742  | 6.002838164 | 0.93024355  |
| LOC649071 | 0.002052285  | 6.163845582 | 0.930245629 |
| LOC644379 | -0.002360897 | 6.002463451 | 0.930334227 |
| LOC644201 | -0.002254635 | 6.078361329 | 0.930352979 |
| PHOSPHO1  | -0.002417238 | 6.095889884 | 0.930388528 |
| LOC649722 | 0.002106422  | 6.070907205 | 0.930411008 |
| MGC44328  | 0.002582953  | 5.994994415 | 0.930411474 |
| LOC646716 | -0.002100575 | 6.037377712 | 0.930495394 |
| KRTAP3-1  | 0.001866333  | 6.136368458 | 0.930511772 |
| LOC642833 | 0.002482373  | 6.287947206 | 0.930535182 |
| TGFBR1    | -0.002413846 | 6.156227102 | 0.930603977 |
| BLMH      | -0.00548709  | 7.447024175 | 0.930606011 |
| LOC550631 | 0.002537154  | 6.069902265 | 0.930619967 |
| LY6K      | -0.002229954 | 6.018212085 | 0.930711503 |
| SORCS3    | 0.001579753  | 6.134038395 | 0.930738688 |
| VTI1A     | 0.002795243  | 6.033611748 | 0.93076382  |
| OR52D1    | -0.002824902 | 6.203028467 | 0.93081532  |
| VENTXP7   | 0.00148663   | 6.032302637 | 0.930880991 |
| MMP10     | -0.002061861 | 5.994427542 | 0.93091984  |
| OASL      | 0.003218361  | 6.071941851 | 0.930947275 |
| LOC641753 | 0.00263804   | 5.998081652 | 0.930949594 |
| LOC648795 | -0.002378815 | 6.001815494 | 0.93098589  |
| LOC646888 | 0.002270356  | 6.013444788 | 0.931131835 |
| PINX1     | 0.00197649   | 6.813083814 | 0.931149306 |
| C21ORF77  | -0.002219571 | 6.146754338 | 0.931212514 |
| CACNB4    | -0.001527697 | 5.967968138 | 0.931273576 |
| CLEC1B    | -0.002279588 | 5.977048924 | 0.931366752 |
| GDF11     | 0.003810644  | 6.072031738 | 0.931503606 |
| NPAL2     | -0.001704624 | 6.208294251 | 0.931640971 |
| UNC13C    | -0.001343971 | 5.999371741 | 0.931694652 |
| LOC389072 | -0.001986554 | 6.078892848 | 0.931755845 |
| SOCS7     | -0.001904755 | 6.091256282 | 0.931878112 |
| LOC648816 | 0.002030473  | 6.102142523 | 0.931917433 |
| RCC1      | 0.002454731  | 6.058070982 | 0.93191765  |
| TSC2      | -0.002672126 | 6.939278609 | 0.932011522 |
| PCDHGA1   | 0.001340303  | 6.045587594 | 0.932251278 |

## DEG.infomation

|           |              |             |             |
|-----------|--------------|-------------|-------------|
| LOC652015 | -0.002009329 | 6.0631548   | 0.932320605 |
| LOC641977 | 0.001537816  | 6.023733994 | 0.932337061 |
| OR5T3     | 0.002312772  | 6.118016463 | 0.932386514 |
| LOC653528 | 0.002863289  | 5.79980331  | 0.932429743 |
| LOC646207 | 0.002188173  | 6.186193878 | 0.932465899 |
| ATRN      | 0.001727046  | 6.885988622 | 0.932495845 |
| UNQ9391   | -0.002805582 | 6.11975363  | 0.932498691 |
| LOC651495 | 0.002347191  | 6.102888338 | 0.932528132 |
| SHC3      | -0.002984012 | 6.016246104 | 0.932689007 |
| NBPF7     | 0.00168628   | 6.027417128 | 0.932889434 |
| SNORD18B  | 0.002041758  | 5.95922487  | 0.932922705 |
| HRES1     | -0.002829557 | 6.144357269 | 0.932934089 |
| LOC152118 | -0.001933771 | 6.127436036 | 0.932937863 |
| LOC653806 | 0.002080396  | 6.112586284 | 0.932998787 |
| IL9       | 0.001614523  | 6.07319774  | 0.933184645 |
| SLC25A31  | -0.002655427 | 6.139992482 | 0.933279155 |
| KIAA1906  | 0.001940066  | 6.166671703 | 0.933287784 |
| OIT3      | 0.002960479  | 6.084168707 | 0.933310266 |
| LOC646932 | -0.001867095 | 6.180442665 | 0.933342527 |
| CXORF48   | 0.00125521   | 6.088584945 | 0.933398287 |
| LOC391727 | -0.00222935  | 6.044660494 | 0.933445916 |
| CCDC146   | 0.004975272  | 6.693757924 | 0.933513761 |
| SLC35D2   | -0.003547905 | 7.329909435 | 0.933700347 |
| LOC731837 | -0.00215129  | 6.077207811 | 0.933719661 |
| LOC644231 | -0.002100349 | 5.927122564 | 0.933915636 |
| C6ORF122  | 0.002089792  | 6.10820531  | 0.933931752 |
| PIP       | -0.002297392 | 6.038577276 | 0.93396616  |
| LCE2B     | -0.002331867 | 6.054362235 | 0.933981148 |
| LOC650678 | 0.002374917  | 5.97652458  | 0.934004575 |
| CELP      | -0.002246599 | 5.980266792 | 0.934025966 |
| TRPS1     | -0.002932232 | 6.285250054 | 0.934065632 |
| GDF3      | -0.002185947 | 6.096239754 | 0.93409906  |
| RPS14     | -0.003056175 | 12.92045118 | 0.934108156 |
| LOC654209 | -0.002230092 | 6.128651516 | 0.934110793 |
| LOC653554 | 0.001980481  | 5.88646053  | 0.934285322 |
| CYP2C8    | 0.00298915   | 6.053727448 | 0.934404341 |
| DEFB105A  | 0.002226273  | 6.082750191 | 0.934404441 |
| CNTNAP2   | 0.003960544  | 6.200699432 | 0.934441515 |
| LOC650040 | 0.001945945  | 6.061138618 | 0.93445853  |
| DNTT      | 0.001725354  | 6.091911644 | 0.934468955 |
| OR8K1     | 0.00191008   | 5.956386946 | 0.934491277 |
| LOC653088 | -0.002148574 | 6.048383895 | 0.934635209 |
| PPP2R5C   | 0.002809027  | 8.241131511 | 0.934660424 |
| TAPBPL    | -0.004129359 | 7.072234481 | 0.934691827 |
| LOC442049 | -0.00224452  | 6.270746675 | 0.934692844 |
| C1ORF146  | -0.001621464 | 6.007905641 | 0.934749508 |
| SNORD33   | 0.002418062  | 6.541221645 | 0.934794764 |
| LOC650034 | -0.002370694 | 6.670398364 | 0.934873849 |
| FAM9A     | 0.002350749  | 5.868253558 | 0.934948347 |
| LOC654121 | -0.006240684 | 9.270287089 | 0.93495036  |
| FAM75A1   | 0.002068041  | 6.081108679 | 0.935188504 |

## DEG.infomation

|           |              |             |             |
|-----------|--------------|-------------|-------------|
| LOC442570 | 0.001689783  | 6.064004612 | 0.93549611  |
| RGS9BP    | -0.002766678 | 6.405026202 | 0.935500502 |
| GPR97     | 0.001062515  | 6.084041087 | 0.935554549 |
| LOC643033 | 0.001770238  | 6.030566473 | 0.935573547 |
| LOC648240 | 0.002243286  | 5.918346525 | 0.935788782 |
| C16ORF78  | -0.001747495 | 5.962197757 | 0.935808086 |
| SSTR1     | 0.001563754  | 6.05581408  | 0.935820292 |
| GPR98     | -0.001656012 | 6.027087841 | 0.93587037  |
| RAB36     | 0.002340978  | 5.890286837 | 0.935907235 |
| DCHS2     | -0.00140794  | 5.980551508 | 0.935969994 |
| LOC651101 | -0.002144433 | 6.240738361 | 0.936089509 |
| TSHZ3     | -0.003841327 | 7.443925326 | 0.936125969 |
| LOC642381 | 0.002079585  | 6.090199932 | 0.936135026 |
| HOXB6     | -0.004048625 | 7.077197959 | 0.936146241 |
| OR1J2     | -0.002232582 | 6.231878081 | 0.936172924 |
| LOC647582 | -0.002039105 | 5.958508587 | 0.936268272 |
| KIR2DS2   | 0.002183067  | 6.058026832 | 0.936270328 |
| LOC647199 | 0.002412593  | 6.13256495  | 0.936328092 |
| S100A7A   | 0.002165283  | 5.967417018 | 0.936422895 |
| LOC729985 | 0.007164199  | 6.752372184 | 0.936520004 |
| LOC646004 | -0.00215717  | 5.968092845 | 0.936760151 |
| HSPD1     | 0.003917522  | 10.24357609 | 0.936855971 |
| NEK2      | -0.001419189 | 6.073239375 | 0.936871892 |
| RBP5      | -0.002436117 | 6.438458756 | 0.93697279  |
| HIST1H2AB | -0.002890513 | 6.08737973  | 0.937050263 |
| LOC643502 | -0.001882919 | 6.197558055 | 0.937160968 |
| LOC653667 | -0.001784862 | 6.108154152 | 0.937163121 |
| PF4       | -0.001870749 | 5.918498262 | 0.937232045 |
| PODNL1    | 0.002322438  | 6.211766744 | 0.937239077 |
| CBX6      | -0.004019423 | 9.098162617 | 0.937309094 |
| CYP2F1    | 0.001493257  | 6.00617457  | 0.937322717 |
| LOC643850 | 0.002054984  | 6.104350153 | 0.937454953 |
| LOC650751 | -0.002183771 | 5.940153424 | 0.937468032 |
| ICAM1     | -0.003635242 | 6.039228924 | 0.937502942 |
| FTSJ3     | -0.003571656 | 6.685232898 | 0.937542743 |
| LGALS14   | -0.002154846 | 6.163724042 | 0.937592806 |
| RASSF8    | 0.002142427  | 6.25278513  | 0.937664647 |
| OIP5      | 0.001773658  | 6.189636665 | 0.937666652 |
| HOXB3     | -0.002182959 | 5.966157654 | 0.937743062 |
| LOC647417 | 0.001922925  | 6.112707679 | 0.937825949 |
| LOC285544 | 0.001830516  | 6.071938724 | 0.937860093 |
| C3ORF63   | 0.002828455  | 7.046359066 | 0.937901446 |
| DAPL1     | -0.001943535 | 6.003893896 | 0.93790272  |
| C20ORF4   | 0.00343853   | 8.23112841  | 0.937980073 |
| OR2T6     | 0.002171978  | 6.10971969  | 0.937984946 |
| BTBD17    | 0.002248     | 5.840813093 | 0.938072338 |
| SLC24A2   | -0.001982914 | 6.103835825 | 0.938084144 |
| LOC647894 | -0.002746926 | 6.010493313 | 0.938099779 |
| SLC3A1    | -0.001963757 | 6.095761078 | 0.938158451 |
| ZNF114    | 0.001650816  | 6.097640393 | 0.938166935 |
| C10ORF79  | 0.002017958  | 5.961227798 | 0.938225467 |

## DEG.infomation

|           |              |             |             |
|-----------|--------------|-------------|-------------|
| LOC401164 | 0.001864695  | 6.08853511  | 0.938251911 |
| VKORC1L1  | 0.004804651  | 8.421482284 | 0.938289264 |
| LRRC4     | -0.002619117 | 5.93529259  | 0.938443908 |
| LOC651175 | 0.00210139   | 6.000702713 | 0.938446381 |
| DIAPH1    | 0.006024384  | 8.514243499 | 0.938505337 |
| MOV10     | -0.002672232 | 6.981867186 | 0.938738735 |
| KLK6      | -0.001379939 | 6.083731828 | 0.938875859 |
| CCNH      | -0.003006086 | 7.80825316  | 0.938925384 |
| LOC643286 | 0.002062457  | 6.033075483 | 0.938959617 |
| COX411    | 0.00343786   | 14.59557879 | 0.938981978 |
| LOC644447 | -0.001912798 | 6.107763479 | 0.938994582 |
| LOC729238 | 0.001798861  | 6.083386678 | 0.939034663 |
| SLC22A3   | -0.0014461   | 6.089644398 | 0.939076016 |
| MARK4     | -0.002916182 | 5.981524278 | 0.93921029  |
| RPS26P10  | 0.004971452  | 7.054092672 | 0.939266784 |
| KCTD19    | 0.001969921  | 6.031533075 | 0.939469742 |
| TDH       | 0.001858101  | 5.952116348 | 0.939749575 |
| ENPP3     | -0.002110188 | 6.088367942 | 0.939757748 |
| LOC649841 | -0.005415714 | 6.906718016 | 0.939767572 |
| PTCHD3    | -0.001212501 | 6.107490823 | 0.939825799 |
| CYP3A7    | 0.002342144  | 5.98130192  | 0.939886689 |
| TMEM184B  | 0.003748794  | 8.13206331  | 0.940004682 |
| LPIN1     | -0.005449269 | 10.36867887 | 0.940021423 |
| TMEM120A  | -0.005234345 | 9.41641285  | 0.940219645 |
| JMJD2C    | -0.001982506 | 6.328778505 | 0.940269258 |
| STON2     | -0.001894764 | 5.964913057 | 0.940308749 |
| LOC651772 | 0.001984017  | 6.127559075 | 0.940339637 |
| MYEOV     | -0.001855173 | 6.063052249 | 0.940892584 |
| NRTN      | 0.004925291  | 7.258279528 | 0.940971239 |
| HIST2H2BF | 0.001818861  | 6.258585681 | 0.941017692 |
| SPTA1     | 0.002227296  | 6.169037524 | 0.941031791 |
| ERO1LB    | 0.002196674  | 6.53587264  | 0.941097826 |
| KRT28     | -0.001711792 | 5.953396802 | 0.941234447 |
| CCDC22    | 0.003904661  | 6.597873129 | 0.941287666 |
| EIF3F     | -0.003417995 | 10.48324182 | 0.941296906 |
| DEFB123   | 0.00225902   | 6.206143117 | 0.941382131 |
| LOC650330 | -0.001703373 | 5.937964915 | 0.941437951 |
| LOC643699 | 0.00219374   | 6.115622759 | 0.941491857 |
| LOC647257 | 0.001800529  | 6.061630258 | 0.941590451 |
| LOC441964 | 0.001692524  | 6.039127885 | 0.941610348 |
| SELPLG    | 0.001805756  | 6.053422213 | 0.941618899 |
| C3ORF20   | 0.002058055  | 6.007499397 | 0.941702566 |
| LOC642293 | 0.001900648  | 5.853760131 | 0.941754915 |
| FLJ31568  | -0.001208756 | 6.038105179 | 0.942039442 |
| GPX2      | 0.00190376   | 6.174094444 | 0.942222856 |
| CYP1A2    | -0.001909649 | 6.017173006 | 0.942296326 |
| PSD2      | 0.001777224  | 6.146034141 | 0.94251412  |
| LOC645413 | -0.001755863 | 6.108181331 | 0.942523626 |
| PRO0132   | -0.001495141 | 5.992333928 | 0.942607506 |
| APOL4     | -0.001535801 | 6.101083566 | 0.942746364 |
| LOC730419 | -0.001408299 | 5.989874777 | 0.942849993 |

## DEG.infomation

|           |              |             |             |
|-----------|--------------|-------------|-------------|
| LOC644963 | 0.00169699   | 6.062639381 | 0.942904606 |
| LOC643677 | -0.001793342 | 6.003406418 | 0.942994294 |
| LOC650620 | 0.002217299  | 6.372991322 | 0.942999056 |
| MUC15     | -0.001976243 | 6.028165207 | 0.943234079 |
| LOC647995 | -0.001820918 | 6.241797923 | 0.943234158 |
| LOC650256 | 0.001735869  | 5.951352974 | 0.943283491 |
| FLJ34306  | 0.001545092  | 5.961053142 | 0.943318973 |
| LOC643468 | 0.001701017  | 5.961707142 | 0.943323588 |
| SNORD27   | 0.001820475  | 5.941320692 | 0.943349759 |
| LOC653616 | 0.002010392  | 6.147202112 | 0.943362314 |
| MESP2     | -0.001891461 | 6.020500113 | 0.943379306 |
| LOC644880 | 0.002166977  | 6.076928256 | 0.943383239 |
| UBE2E3    | 0.002359907  | 7.360804325 | 0.94348093  |
| GSTM4     | 0.00274048   | 6.666018674 | 0.943501498 |
| TMEM171   | 0.001722902  | 5.944942296 | 0.943505675 |
| CCT4      | -0.002910667 | 6.976651511 | 0.943558283 |
| ZNF833    | -0.001837668 | 6.192216566 | 0.943602283 |
| LOC649276 | -0.001820635 | 6.187177625 | 0.9437067   |
| HRAS      | -0.002579367 | 7.965258334 | 0.943711436 |
| RXFP1     | -0.001599178 | 5.910128814 | 0.943795641 |
| MRPL32    | 0.003886302  | 10.24664185 | 0.943831623 |
| NOTCH2NL  | -0.001597849 | 6.209375259 | 0.943865749 |
| LOC389936 | -0.001499764 | 5.93552661  | 0.94400971  |
| LOC642359 | 0.001719826  | 6.032823483 | 0.94415126  |
| C20ORF77  | 0.00165926   | 6.035928072 | 0.944216371 |
| CCDC36    | -0.002019515 | 6.164056302 | 0.944223563 |
| C21ORF94  | -0.001556251 | 6.039115384 | 0.944252325 |
| HIST1H4K  | 0.003757903  | 6.785104154 | 0.9443365   |
| UGT1A4    | 0.001846944  | 5.983665868 | 0.944357627 |
| CPN2      | -0.00360604  | 6.581637922 | 0.94438159  |
| LOC654249 | 0.001629182  | 6.180071077 | 0.94443923  |
| LOC647436 | -0.006403763 | 7.836935636 | 0.944829222 |
| A1CF      | 0.001153687  | 6.108813451 | 0.944867727 |
| PCSK2     | -0.002272853 | 5.986257256 | 0.944936862 |
| LOC651820 | 0.001753705  | 6.082133868 | 0.944954339 |
| LOC647979 | 0.002471383  | 5.943057161 | 0.945406371 |
| PGAM4     | -0.002749387 | 9.556409845 | 0.94551572  |
| LOC401296 | 0.001957136  | 6.264786446 | 0.945524707 |
| SMG7      | -0.003166132 | 7.813375209 | 0.945528153 |
| ST7OT2    | -0.001762726 | 6.043531745 | 0.945535477 |
| ISX       | -0.001726612 | 6.049977895 | 0.945568636 |
| LOC652076 | -0.001468602 | 6.20824146  | 0.945695661 |
| LOC388117 | 0.001728227  | 5.990734023 | 0.945813117 |
| CFHR2     | 0.00203554   | 6.312376819 | 0.945846416 |
| LOC652505 | -0.002066992 | 5.950250177 | 0.945853865 |
| HIST1H1E  | -0.00162466  | 5.90658434  | 0.946020608 |
| SLC6A10P  | -0.003749191 | 8.886529861 | 0.946135609 |
| COX10     | 0.003530406  | 10.5866177  | 0.946141104 |
| ZNF749    | 0.002694013  | 6.041885739 | 0.946183442 |
| UBXN10    | -0.00219017  | 6.567697828 | 0.946190468 |
| LOC653362 | -0.001771835 | 6.113195443 | 0.946201301 |

## DEG.infomation

|           |              |             |             |
|-----------|--------------|-------------|-------------|
| ANO9      | 0.00113908   | 6.155144246 | 0.946214795 |
| LOC642360 | 0.001557987  | 6.044194258 | 0.946371799 |
| ACCN1     | -0.001257237 | 6.078033112 | 0.946480594 |
| LOC648623 | 0.00173691   | 6.133788913 | 0.946500647 |
| LOC642490 | -0.001728748 | 6.075017167 | 0.946562943 |
| LOC404266 | -0.001757187 | 6.087228454 | 0.946648442 |
| C17ORF64  | 0.001997735  | 6.259724905 | 0.946982959 |
| DLX4      | 0.001178161  | 6.12116362  | 0.946992425 |
| ZNF8      | -0.002444758 | 6.188646954 | 0.947262373 |
| GALNT6    | -0.002120967 | 6.479863062 | 0.947332828 |
| SPTY2D1   | -0.00224626  | 7.067163284 | 0.947551777 |
| AKR1CL1   | -0.001997901 | 6.193584604 | 0.94765316  |
| BNIP1     | -0.001938039 | 7.009511615 | 0.948021472 |
| OR4A47    | -0.001676643 | 5.929226226 | 0.948071311 |
| LOC651713 | -0.001277471 | 6.060884824 | 0.94807402  |
| RNF166    | -0.002124311 | 6.550753586 | 0.94813665  |
| HLA-DPB2  | -0.001277354 | 5.949411067 | 0.94820353  |
| PCDHGA10  | 0.001570485  | 6.351304041 | 0.948243047 |
| LOC126767 | -0.001498079 | 6.176548885 | 0.948276301 |
| CCDC153   | -0.001151187 | 6.002706285 | 0.948303619 |
| C10ORF62  | -0.0018106   | 6.083923834 | 0.948379408 |
| MYLC2PL   | -0.001514835 | 6.014182439 | 0.94838505  |
| LOC652094 | -0.001732377 | 5.85734327  | 0.948385297 |
| ATP6V1C1  | 0.001759377  | 6.666661672 | 0.948404578 |
| FLJ44861  | -0.001642147 | 6.007572244 | 0.948419379 |
| SP7       | 0.001592485  | 5.978154232 | 0.948585176 |
| LOC727773 | 0.001049577  | 6.244951452 | 0.949045616 |
| PLA2G3    | -0.001635626 | 6.015234445 | 0.949081674 |
| UNG2      | 0.001610179  | 6.29755885  | 0.94912282  |
| LOC731985 | -0.003611953 | 11.68220322 | 0.949169518 |
| FOXR2     | 0.001476709  | 5.973417481 | 0.949170673 |
| RIBC2     | 0.001558974  | 6.00823226  | 0.949280476 |
| NPR1      | 0.002901472  | 6.115094261 | 0.94928336  |
| LOC730746 | -0.005467939 | 6.775660301 | 0.949309478 |
| FLJ20297  | -0.001724334 | 6.015069704 | 0.94939264  |
| SMYD5     | 0.001686118  | 6.52256349  | 0.949452629 |
| CPA5      | 0.001742783  | 6.08630116  | 0.94947108  |
| LOC643792 | 0.001695295  | 6.265292659 | 0.949883776 |
| RASSF3    | -0.002123705 | 6.140579112 | 0.94988914  |
| SLC25A2   | -0.00159099  | 6.010646783 | 0.949950555 |
| HIST1H2AA | 0.001295613  | 6.059850026 | 0.949957286 |
| SMARCA1   | -0.003046635 | 8.142514621 | 0.949986051 |
| LOC651758 | 0.001602143  | 6.062914356 | 0.95011824  |
| KRTAP19-5 | -0.002297917 | 5.91464398  | 0.950170498 |
| CAPN9     | 0.001196936  | 6.058011904 | 0.950241712 |
| MRPS18C   | 0.003362383  | 9.496792016 | 0.950298854 |
| LOC646879 | 0.001542938  | 6.116745118 | 0.950318377 |
| LOC730684 | 0.001256906  | 6.04462873  | 0.950541235 |
| LOC646106 | -0.001531808 | 6.304856317 | 0.950615549 |
| DSG1      | 0.002035264  | 6.054217457 | 0.950660441 |
| GFRA4     | -0.00142275  | 6.304453815 | 0.950686831 |



## DEG.infomation

|           |              |             |             |
|-----------|--------------|-------------|-------------|
| RB1       | 0.002712542  | 7.162203234 | 0.950724122 |
| ASCL4     | -0.00185228  | 5.91530101  | 0.950725564 |
| KRT5      | -0.001444081 | 5.956024692 | 0.950822576 |
| ZNF92     | 0.001034561  | 6.089801388 | 0.95090291  |
| LOC651659 | 0.001598596  | 6.101743273 | 0.950984813 |
| LOC389174 | 0.001680911  | 6.114038576 | 0.950994659 |
| GUCY2C    | -0.001662726 | 5.947514671 | 0.951037062 |
| FGA       | 0.001473698  | 6.741440507 | 0.951050592 |
| ZBTB39    | 0.001433937  | 6.403129121 | 0.951333933 |
| SAMD3     | 0.000861673  | 6.053681479 | 0.951347249 |
| UMODL1    | 0.000980058  | 6.01464602  | 0.95144706  |
| SMPD2     | -0.001957059 | 6.44573865  | 0.951578923 |
| LOC390880 | -0.001473611 | 5.982087615 | 0.951591151 |
| LOC731823 | -0.001253309 | 5.9898119   | 0.951613567 |
| LOC649970 | -0.001528952 | 6.082613651 | 0.951689403 |
| LOC647760 | 0.001455902  | 6.022684144 | 0.951738823 |
| FLJ34690  | 0.001638496  | 6.077307684 | 0.951830572 |
| LOC441377 | -0.007023705 | 10.2633253  | 0.951845187 |
| SRMS      | -0.001341447 | 6.114498507 | 0.952010756 |
| SPRR2F    | -0.001766182 | 6.076631995 | 0.952036126 |
| LOC647527 | -0.002189153 | 6.043436782 | 0.952130011 |
| SFRS11    | 0.0054861    | 7.474884523 | 0.952144648 |
| FMO5      | -0.001554254 | 6.159385995 | 0.952239667 |
| HRASLS5   | -0.001340975 | 5.984111064 | 0.952411909 |
| LOC651410 | 0.001543528  | 6.029995238 | 0.952518963 |
| ALOX15    | -0.000857128 | 6.111386912 | 0.952527696 |
| KIF18A    | 0.0011943    | 5.908340302 | 0.952618305 |
| LOC643369 | 0.001291972  | 5.968811819 | 0.952634618 |
| LOC392447 | -0.001271772 | 6.007428506 | 0.95265109  |
| NKX6-1    | 0.002189156  | 5.848918263 | 0.952661756 |
| LOC642646 | 0.001605145  | 5.988142599 | 0.952669334 |
| MGC33948  | 0.001803321  | 6.481813229 | 0.952700755 |
| FBS1      | -0.00177548  | 6.49989467  | 0.952724975 |
| C17ORF46  | 0.001488924  | 6.241823872 | 0.952743689 |
| MS4A15    | -0.001788129 | 6.080512383 | 0.952782743 |
| LOC652769 | -0.001649158 | 5.93780524  | 0.952862442 |
| SACS      | -0.004788898 | 7.212349259 | 0.952900855 |
| SH3RF3    | 0.002813583  | 7.079335288 | 0.952993105 |
| LOC646444 | 0.002091377  | 5.950574628 | 0.953220538 |
| LOC727811 | 0.001345983  | 6.019601052 | 0.953236842 |
| TOP1      | 0.001411126  | 6.124665411 | 0.953271588 |
| TPD52L3   | -0.000981585 | 6.164076683 | 0.953289841 |
| TMEM160   | 0.002792434  | 9.533906493 | 0.953295744 |
| LOC285307 | -0.001479579 | 6.046211485 | 0.953377416 |
| ADRB3     | 0.00154118   | 6.083485388 | 0.953508801 |
| SNHG4     | -0.00149563  | 6.102495721 | 0.953536957 |
| SARDH     | -0.001419815 | 6.011703412 | 0.95354157  |
| ZNF773    | -0.002175972 | 7.415345984 | 0.953571115 |
| LOC652175 | -0.002241605 | 5.980291765 | 0.953597871 |
| CRK       | -0.00291205  | 8.533552826 | 0.953603421 |
| ZNF101    | 0.001483755  | 6.225477986 | 0.953653554 |

## DEG.infomation

|           |              |             |             |
|-----------|--------------|-------------|-------------|
| TMEM222   | 0.002127213  | 7.226106333 | 0.953660278 |
| MATN3     | -0.001708062 | 6.140805944 | 0.953677798 |
| LOC643454 | 0.001668553  | 6.118336851 | 0.953725007 |
| YPEL4     | -0.001638204 | 6.077044035 | 0.953845659 |
| WFDC6     | 0.001535541  | 5.987018678 | 0.953901707 |
| LOC646361 | -0.001481801 | 5.992406312 | 0.953915995 |
| TTL       | 0.003280346  | 8.929947637 | 0.953963481 |
| LOC645679 | -0.001332388 | 6.04825579  | 0.954002611 |
| FUT5      | -0.001549449 | 6.138355901 | 0.954155572 |
| STAP2     | -0.000915654 | 6.265156808 | 0.95417802  |
| C12ORF11  | -0.001783061 | 7.093908278 | 0.95420042  |
| RPL23AP13 | 0.00321026   | 8.25104506  | 0.954315664 |
| SEC22B    | -0.002304536 | 8.238130038 | 0.954371645 |
| LOC648955 | -0.001461026 | 6.060941494 | 0.954479284 |
| LOC729754 | 0.001568489  | 5.983665411 | 0.954613989 |
| LOC642213 | -0.001380764 | 6.03171604  | 0.954713947 |
| LOC136157 | 0.000880571  | 6.082011409 | 0.954808777 |
| CHERP     | 0.001701193  | 7.066303242 | 0.954811426 |
| COX7B2    | 0.001589388  | 5.98079314  | 0.954925571 |
| LOC646630 | 0.003588689  | 12.29780512 | 0.954941524 |
| PRO1768   | -0.00147697  | 6.012636487 | 0.955039283 |
| FOXB1     | -0.001054667 | 6.054177732 | 0.955193224 |
| TBC1D10B  | 0.00194828   | 6.724199825 | 0.95523703  |
| LOC644719 | -0.001544406 | 6.117408949 | 0.955266193 |
| CKAP2L    | -0.001480999 | 6.050784312 | 0.955308208 |
| CCDC42    | 0.00173274   | 5.826488872 | 0.955338372 |
| LOC441488 | 0.001312699  | 6.06351682  | 0.955352643 |
| LOC648680 | 0.001492735  | 5.890093751 | 0.955410562 |
| LOC389634 | 0.001305874  | 6.094660254 | 0.955461917 |
| LOC653935 | -0.001352745 | 6.011567089 | 0.955702636 |
| MYOG      | 0.001931587  | 6.075448147 | 0.955743879 |
| FLJ46156  | -0.001436454 | 6.09504568  | 0.955848994 |
| FLCN      | -0.001116176 | 6.293729775 | 0.955879612 |
| STAC2     | 0.00150782   | 6.278736387 | 0.955904153 |
| SMA3      | -0.001406805 | 5.974250577 | 0.955915459 |
| ZP2       | 0.001484282  | 5.971364    | 0.955961216 |
| LCE2D     | -0.001352118 | 6.059174537 | 0.956029563 |
| FLJ20184  | -0.001945556 | 5.9396222   | 0.95613044  |
| PARP1     | 0.002696676  | 10.86883872 | 0.956134646 |
| MARS      | 0.002569077  | 7.832099355 | 0.956155439 |
| TTY10     | -0.002240858 | 6.123366599 | 0.956191328 |
| REG4      | 0.001770652  | 5.959815563 | 0.956405793 |
| TPSD1     | 0.001401896  | 5.981340657 | 0.956591251 |
| LOC648615 | 0.001359588  | 6.12037745  | 0.956684554 |
| LOC440145 | -0.001722353 | 7.052435147 | 0.956800255 |
| FLJ44450  | 0.001445916  | 6.203001257 | 0.956850096 |
| LOC440261 | 0.000817431  | 6.131038471 | 0.956915242 |
| CASP8     | -0.001069985 | 6.056796107 | 0.956951724 |
| LOC647534 | 0.001508672  | 6.131756762 | 0.957273659 |
| CCAR1     | -0.002698946 | 6.554211186 | 0.957343257 |
| LOC643747 | 0.001202513  | 6.020571372 | 0.957357057 |

## DEG.infomation

|           |              |             |             |
|-----------|--------------|-------------|-------------|
| FERD3L    | -0.001439024 | 6.17062674  | 0.957434965 |
| SLFN12    | 0.001612622  | 6.126979987 | 0.957651202 |
| LOC653060 | -0.00151795  | 5.999916361 | 0.957793615 |
| HARBI1    | 0.001251632  | 6.279488838 | 0.957853222 |
| LOC651694 | -0.001342423 | 6.033416125 | 0.957870947 |
| FLJ12331  | -0.001428669 | 5.929040286 | 0.958044423 |
| OR3A1     | -0.001482183 | 6.05511932  | 0.958122706 |
| TSC22D2   | 0.003790663  | 8.608512558 | 0.958147666 |
| GDF2      | -0.001295132 | 5.964829126 | 0.958154988 |
| CASS4     | -0.001221117 | 5.990726262 | 0.958738126 |
| C12ORF64  | -0.000738621 | 6.080240007 | 0.958791056 |
| UGT8      | 0.00091384   | 6.02443024  | 0.95886773  |
| LOC652740 | 0.001297215  | 6.000215491 | 0.958961168 |
| PRAMEF1   | -0.000821728 | 6.004362106 | 0.958991355 |
| GNAL      | -0.000765328 | 6.063893837 | 0.95901988  |
| LOC339782 | -0.001505497 | 6.383041939 | 0.959114348 |
| LOC645941 | 0.001212063  | 6.178571087 | 0.959418165 |
| LOC651118 | 0.001286918  | 5.957689497 | 0.959439905 |
| TXK       | 0.001257307  | 5.967411629 | 0.959468073 |
| LOC642188 | -0.001226639 | 6.09552044  | 0.959562252 |
| PCDHB16   | -0.001493105 | 6.310391377 | 0.959594888 |
| ECAT8     | 0.002165604  | 6.247927984 | 0.959605727 |
| PNLIPRP2  | 0.00126135   | 5.900018776 | 0.959630252 |
| ELAVL3    | -0.001046982 | 6.295779537 | 0.959653932 |
| OR5T2     | 0.000927064  | 6.007542784 | 0.959686565 |
| RXRB      | 0.003344751  | 7.751320772 | 0.95978451  |
| LOC650767 | -0.001300819 | 6.086752668 | 0.959900159 |
| ITIH1     | 0.001916625  | 6.099045394 | 0.960197759 |
| LOC644087 | -0.001135135 | 5.993262375 | 0.960337751 |
| TUBAL3    | -0.00175854  | 6.221093981 | 0.960501599 |
| CIT       | 0.001548476  | 5.896218869 | 0.960555064 |
| COX8C     | -0.001259868 | 6.132015604 | 0.960668521 |
| CASP10    | 0.00098682   | 6.342415958 | 0.960720449 |
| UBXN6     | 0.002650881  | 9.282782327 | 0.960728242 |
| LOC650243 | 0.001207627  | 6.036259994 | 0.960773226 |
| LOC644331 | 0.001114373  | 6.174212361 | 0.960829217 |
| LOC644187 | -0.001243879 | 6.031479218 | 0.961026901 |
| TCEA3     | -0.003558509 | 11.04964412 | 0.961073335 |
| EIF4E2    | -0.00431111  | 7.696066929 | 0.961142602 |
| PSEN1     | -0.000669361 | 6.138733992 | 0.961323206 |
| ARFRP1    | -0.001352191 | 6.836971614 | 0.961358794 |
| GSTM1L    | 0.001229253  | 5.955651039 | 0.961453553 |
| C6ORF141  | 0.001202996  | 6.115802863 | 0.961464641 |
| LOC644298 | -0.001263854 | 5.964044189 | 0.961567789 |
| ASCL1     | -0.001381419 | 6.118333101 | 0.961679732 |
| KIF12     | 0.001319544  | 6.030565084 | 0.961739479 |
| ARID1B    | -0.000979569 | 6.111470233 | 0.961745541 |
| RAB6C     | 0.00105845   | 5.961688161 | 0.961821416 |
| IGFALS    | -0.001234163 | 6.17921869  | 0.961822112 |
| DSPP      | -0.001267027 | 6.036217141 | 0.961980866 |
| RNF10     | -0.002694819 | 8.157792242 | 0.962011378 |

## DEG.infomation

|           |              |             |             |
|-----------|--------------|-------------|-------------|
| LOC144817 | -0.00157554  | 5.939281919 | 0.962026622 |
| OR4K17    | -0.000874887 | 5.994514327 | 0.962055143 |
| SBDS      | 0.004776729  | 9.881869027 | 0.962058695 |
| TYMS      | 0.002568493  | 6.589709856 | 0.962083895 |
| H2AFB3    | -0.001310428 | 5.869427118 | 0.962134886 |
| LOC652833 | -0.001165215 | 6.156628608 | 0.962171613 |
| APOC2     | -0.001468977 | 6.109978603 | 0.962228395 |
| C11ORF10  | 0.003305236  | 11.39417923 | 0.96225597  |
| LOC651065 | -0.00126029  | 6.045305561 | 0.962340502 |
| IRF2      | -0.000957479 | 6.267266158 | 0.962433738 |
| RUNDC3B   | -0.001981417 | 6.557505374 | 0.962457719 |
| PRSS21    | -0.000937027 | 6.140459137 | 0.962476645 |
| C1ORF150  | -0.001324457 | 5.975643367 | 0.962546455 |
| KIRREL2   | 0.000798136  | 6.029814495 | 0.962627386 |
| KRTAP4-12 | -0.001118442 | 6.134006311 | 0.962650884 |
| LOC644658 | 0.001159568  | 5.925773577 | 0.962717848 |
| SAR1A     | -0.003140243 | 8.971677108 | 0.962753582 |
| POLA      | -0.001248033 | 6.155366413 | 0.962758607 |
| NOBOX     | 0.000840488  | 6.107546626 | 0.962776322 |
| DEFB136   | -0.001155543 | 5.950458784 | 0.962807837 |
| C7ORF52   | -0.001287565 | 6.048681872 | 0.962957753 |
| MCCD1     | 0.001499316  | 6.287536958 | 0.963108653 |
| C16ORF65  | -0.001178001 | 6.010473602 | 0.963114654 |
| LOC729900 | -0.001023763 | 6.005917077 | 0.963118457 |
| LOC643094 | 0.001221563  | 5.920756353 | 0.963192499 |
| LOC643093 | -0.001108398 | 6.041104429 | 0.963246847 |
| LOC644365 | -0.001065622 | 6.003009636 | 0.963275442 |
| ZNF221    | 0.001143525  | 5.914474461 | 0.96330673  |
| LOC646786 | 0.002965469  | 8.291733802 | 0.963481225 |
| LOC646241 | -0.001129899 | 5.948667906 | 0.963547725 |
| CLEC2L    | -0.001505542 | 6.118370737 | 0.963585234 |
| CACNG4    | -0.001296042 | 6.079354301 | 0.963611805 |
| LOC442535 | 0.001202804  | 6.104452647 | 0.963636395 |
| TTY14     | -0.003191039 | 6.299032645 | 0.963643099 |
| LOC645460 | -0.001228301 | 6.145977774 | 0.963723154 |
| LOC653056 | 0.001201358  | 6.028383435 | 0.963782504 |
| LOC442096 | -0.00104392  | 6.027900811 | 0.963789228 |
| ADAM5     | -0.000727911 | 5.998957345 | 0.963852777 |
| LOC647353 | 0.001505662  | 6.190284584 | 0.96391097  |
| CILP2     | -0.001367923 | 5.964979875 | 0.963942224 |
| TMC1      | 0.001121309  | 6.099874473 | 0.963959974 |
| GALK2     | 0.00110107   | 6.660722976 | 0.964155822 |
| ITPRIPL1  | 0.000682632  | 6.092000756 | 0.964156783 |
| LOC651122 | -0.001105878 | 6.10007073  | 0.964182556 |
| LOC651212 | -0.001559331 | 6.053287943 | 0.964273859 |
| KIAA1432  | 0.00124428   | 6.034029989 | 0.964334851 |
| LOC652845 | 0.001241456  | 6.0060521   | 0.964341211 |
| HMX3      | 0.001141277  | 6.03777461  | 0.964473444 |
| LOC441843 | -0.001019449 | 6.115399889 | 0.964477353 |
| ITGB1BP3  | 0.004351058  | 12.25674853 | 0.964597071 |
| LOC388630 | 0.001087992  | 6.342420859 | 0.964650243 |

## DEG.infomation

|           |              |             |             |
|-----------|--------------|-------------|-------------|
| LOC646481 | -0.001620645 | 6.136826278 | 0.964692283 |
| ATXN2L    | -0.000636307 | 6.204178989 | 0.964784629 |
| LOC126661 | -0.001100351 | 6.157241311 | 0.964836892 |
| CYP2A7    | 0.000953433  | 6.060700436 | 0.964868251 |
| AH11      | 0.001878489  | 7.895209152 | 0.964949354 |
| LOC653169 | 0.001128653  | 6.05056326  | 0.965026724 |
| ZBTB7A    | -0.001602056 | 6.087342738 | 0.965045003 |
| LOC645661 | 0.00106173   | 6.103719034 | 0.965196101 |
| AP1S2     | 0.002229373  | 11.37224826 | 0.96523352  |
| MTM       | -0.00131722  | 6.004421704 | 0.965237004 |
| IER3IP1   | 0.002978938  | 8.109346302 | 0.965257693 |
| LOC643901 | 0.001211096  | 6.060609541 | 0.965276949 |
| INTS12    | 0.002038291  | 9.302480476 | 0.96527927  |
| SLC7A3    | 0.00081533   | 6.095695861 | 0.965384152 |
| LOC648552 | -0.001057508 | 6.089420146 | 0.96560488  |
| REEP3     | 0.001410329  | 6.352937554 | 0.965674772 |
| PRAMEF21  | -0.001089083 | 6.029472375 | 0.966152595 |
| NCK2      | -0.002149864 | 8.447004513 | 0.966232356 |
| LOC645459 | 0.000999183  | 5.950947523 | 0.966297751 |
| CASRL1    | -0.000964637 | 6.018361701 | 0.96642026  |
| LOC730926 | -0.001000143 | 5.888845287 | 0.966486828 |
| BTNL3     | -0.000584496 | 6.06788301  | 0.96654192  |
| LOC727832 | 0.000837509  | 6.087938072 | 0.966571178 |
| PHF21B    | 0.001333445  | 6.071047918 | 0.9665866   |
| DLGAP1    | -0.000780073 | 5.984669164 | 0.966588521 |
| ADAM32    | -0.00059766  | 6.047536286 | 0.966589252 |
| LOC652804 | 0.001157973  | 6.029399812 | 0.966713731 |
| PLXNC1    | 0.001018593  | 6.106488326 | 0.966797605 |
| C10ORF136 | 0.001091057  | 6.196630854 | 0.966825191 |
| LOC731106 | 0.001056881  | 5.946227335 | 0.966846628 |
| DUSP14    | -0.002530496 | 8.028361587 | 0.966880574 |
| INSL4     | -0.000992639 | 6.077693751 | 0.96706212  |
| WSCD2     | -0.001165627 | 6.247686488 | 0.967118888 |
| CXORF12   | -0.001790257 | 7.282478616 | 0.967168256 |
| CDY2A     | -0.001113499 | 5.968749153 | 0.967182804 |
| LOC642645 | 0.001121523  | 5.956837301 | 0.96720311  |
| OR4E2     | -0.001100865 | 5.958061742 | 0.967298753 |
| SMR3B     | -0.001089984 | 5.98534026  | 0.967315079 |
| NOXO1     | -0.00082115  | 6.150573086 | 0.967548627 |
| LOC392481 | -0.000932334 | 6.105870302 | 0.967600576 |
| KRTAP5-7  | -0.000912555 | 6.025644008 | 0.967631465 |
| TBC1D28   | -0.00060584  | 6.10703892  | 0.96769356  |
| PRDM7     | -0.000931608 | 5.952354563 | 0.967710647 |
| ATP8B1    | -0.00111583  | 6.273520313 | 0.967756734 |
| LOC644711 | -0.00102929  | 6.100417904 | 0.967815216 |
| SNX29     | -0.001612947 | 7.200955321 | 0.967842029 |
| NSMCE2    | -0.00149027  | 8.393431417 | 0.967904543 |
| C1ORF161  | -0.001085799 | 6.151720433 | 0.967985888 |
| RMI1      | 0.001405614  | 6.958790491 | 0.968002931 |
| SIRT3     | -0.001112501 | 6.033471311 | 0.968016565 |
| LOC651373 | -0.000914803 | 6.125966674 | 0.968111533 |

## DEG.infomation

|           |              |             |             |
|-----------|--------------|-------------|-------------|
| LOC643231 | -0.000961776 | 5.96576125  | 0.968145302 |
| DARS      | -0.001658113 | 11.56723914 | 0.968280799 |
| TTL10     | -0.001108545 | 5.952623911 | 0.968307929 |
| ANKRD36   | 0.000800336  | 6.118174981 | 0.96831576  |
| KCTD17    | 0.001921312  | 6.250823345 | 0.968374641 |
| APRIN     | -0.00107389  | 5.976873758 | 0.968601241 |
| HTR3C     | -0.001033388 | 6.117037567 | 0.96864293  |
| MAGEB6    | -0.000723811 | 6.051185298 | 0.968702381 |
| IPO13     | 0.0021821    | 8.383604363 | 0.968758426 |
| SCFD1     | 0.001512983  | 8.591710577 | 0.968783916 |
| LOC728709 | -0.001087062 | 6.213476798 | 0.968940943 |
| RAB3B     | -0.001086428 | 6.119787047 | 0.969009669 |
| HMOX2     | -0.001700937 | 6.063823664 | 0.969184838 |
| LOC644628 | -0.000987189 | 6.097362293 | 0.969420174 |
| C9ORF45   | -0.001948695 | 7.47222528  | 0.969471153 |
| IL1RAPL2  | -0.001012546 | 6.054449228 | 0.969492005 |
| C1ORF177  | -0.001106152 | 6.26202101  | 0.969512358 |
| TTC7B     | 0.001256774  | 6.471857692 | 0.969577848 |
| CLDN23    | -0.00187215  | 6.731460424 | 0.969702556 |
| LOC647849 | -0.001007303 | 5.933166067 | 0.969752634 |
| C14ORF121 | -0.001080589 | 6.466255466 | 0.969839271 |
| SFTPA1B   | -0.001048707 | 6.000124784 | 0.96991289  |
| ZNF354B   | 0.000966806  | 6.020845283 | 0.969936122 |
| RFX3      | 0.000544668  | 6.071476847 | 0.970029939 |
| LOC650909 | -0.00107074  | 6.468732012 | 0.970065992 |
| ANXA8L2   | -0.000948096 | 6.288688004 | 0.97013148  |
| KIAA1826  | -0.002256951 | 8.940322435 | 0.970174654 |
| FLJ35409  | -0.000875342 | 6.001732509 | 0.97020103  |
| SPP2      | -0.001109935 | 5.930300606 | 0.970328328 |
| CECR5     | 0.00177808   | 9.823878474 | 0.970452169 |
| UGT1A10   | -0.001031411 | 5.88659439  | 0.970521037 |
| LOC653097 | -0.000982029 | 5.990999242 | 0.97055655  |
| SCT       | -0.00132012  | 6.163679425 | 0.970556955 |
| SMCP      | 0.001573269  | 6.142756638 | 0.970563461 |
| ZNF551    | -0.001024007 | 6.356839424 | 0.970565933 |
| PCDHA6    | -0.000726994 | 6.072612103 | 0.970574907 |
| LOC644787 | 0.000894401  | 6.132728615 | 0.970655258 |
| ADRA2A    | -0.001139187 | 6.463194209 | 0.970667586 |
| OR1N1     | 0.001129972  | 6.132394911 | 0.970704405 |
| SLC6A16   | -0.001546514 | 6.340281812 | 0.970987142 |
| HN1L      | -0.001706545 | 6.648391607 | 0.97115333  |
| SEC11B    | 0.00085367   | 6.069692802 | 0.97116565  |
| CXORF20   | 0.000747482  | 5.963728301 | 0.971305845 |
| HIST1H3B  | -0.00098219  | 5.921436556 | 0.971326892 |
| XKR9      | 0.00094658   | 5.984177836 | 0.971421266 |
| CASP14    | -0.001033931 | 6.040307736 | 0.971528739 |
| ARL10     | 0.000875467  | 6.032369657 | 0.971533614 |
| CALCRL    | 0.002430763  | 7.391903755 | 0.971640301 |
| DEFB119   | -0.000741643 | 6.414564577 | 0.971705457 |
| LLGL2     | 0.000419845  | 6.090004316 | 0.971749113 |
| ZFYVE28   | 0.001008998  | 6.001751158 | 0.971855553 |

## DEG.infomation

|           |              |             |             |
|-----------|--------------|-------------|-------------|
| HSD17B2   | -0.001001256 | 5.909079617 | 0.971867833 |
| LOC652536 | 0.000774087  | 6.016668913 | 0.971879202 |
| SAMD5     | 0.000929475  | 6.111593765 | 0.971935241 |
| FAM169A   | -0.000709745 | 6.094567982 | 0.971977063 |
| EPHA1     | 0.000860977  | 6.043523178 | 0.972014882 |
| LGALS13   | -0.001160334 | 6.149072145 | 0.972056391 |
| LOC652676 | -0.000954919 | 6.124741217 | 0.972106855 |
| SUV420H2  | 0.001502119  | 6.006472276 | 0.972175502 |
| PHKA2     | 0.001768527  | 8.06199636  | 0.972176493 |
| LOC652774 | 0.00089414   | 6.016074171 | 0.972182204 |
| ARL4A     | 0.001652805  | 6.991684602 | 0.972231955 |
| LOC648553 | 0.000870991  | 6.003080139 | 0.972239158 |
| LOC646569 | -0.000904483 | 6.009034557 | 0.972259746 |
| TMED6     | -0.000984625 | 5.996109116 | 0.972435824 |
| DNAJB2    | -0.001799251 | 9.522401998 | 0.972593319 |
| LOC652150 | -0.000908553 | 6.075612878 | 0.972596633 |
| LOC653321 | 0.003051068  | 6.018139502 | 0.972634828 |
| KCTD11    | -0.001055676 | 6.611544367 | 0.9727368   |
| C15ORF43  | -0.000720488 | 6.172248357 | 0.972761838 |
| OVCH2     | -0.000937867 | 5.957329154 | 0.972832722 |
| LOC647904 | -0.000873822 | 6.089603642 | 0.972914239 |
| CDH20     | 0.000926237  | 6.327664121 | 0.973069766 |
| MIS12     | 0.001622809  | 8.345613609 | 0.973114925 |
| C2ORF3    | 0.001412003  | 6.063652523 | 0.97317288  |
| CDC2L1    | -0.001313906 | 6.744155201 | 0.973174902 |
| LOC401860 | 0.001144149  | 6.083548337 | 0.973190797 |
| CHRNA2    | 0.000925293  | 6.301568794 | 0.973191664 |
| LOC643388 | 0.000816438  | 6.218276611 | 0.973315228 |
| WISP3     | 0.000516185  | 6.102860926 | 0.973624938 |
| MAGEC3    | -0.000458865 | 5.992661531 | 0.973650969 |
| KRTAP12-3 | 0.000819847  | 6.052308388 | 0.973715284 |
| CXORF15   | -0.000991118 | 6.263683538 | 0.973729239 |
| CCDC87    | 0.000871597  | 5.965795347 | 0.973790054 |
| LOC649425 | 0.000830293  | 6.041816289 | 0.974029751 |
| TBC1D12   | 0.000804515  | 6.188055222 | 0.974042396 |
| PDZK3     | 0.000874421  | 6.179636044 | 0.974081537 |
| CLDN17    | -0.000776807 | 6.113061738 | 0.974189302 |
| GGTL3     | 0.000875047  | 6.475913018 | 0.974210356 |
| LOC401222 | -0.000846393 | 5.951116623 | 0.974304175 |
| TMEM16C   | -0.000832884 | 5.948289819 | 0.974317279 |
| LOC642815 | 0.000850489  | 6.540244105 | 0.974478583 |
| TAS2R40   | 0.000774973  | 5.936260756 | 0.974658505 |
| LOC650422 | 0.000899307  | 6.059737517 | 0.974717027 |
| DOCK7     | -0.000997951 | 6.98512881  | 0.974760496 |
| ITGB3BP   | -0.001194043 | 6.314754264 | 0.974859213 |
| AKAP3     | 0.001009788  | 6.614751245 | 0.974880551 |
| LOC653855 | 0.00083413   | 6.225778204 | 0.97489383  |
| LOC652256 | 0.000677598  | 6.112047272 | 0.97502658  |
| LOC644598 | -0.000753248 | 6.062552608 | 0.975169114 |
| C17ORF56  | 0.000929962  | 6.249450996 | 0.975283801 |
| LOC652735 | 0.000712618  | 6.091829256 | 0.975312568 |

## DEG.infomation

|           |              |             |             |
|-----------|--------------|-------------|-------------|
| LOC645334 | 0.000767366  | 6.183505734 | 0.975447194 |
| PLEKHA8   | -0.001293201 | 6.010645054 | 0.975729601 |
| MAP3K5    | 0.00194638   | 7.896732497 | 0.97595602  |
| C18ORF58  | 0.00078452   | 6.039526644 | 0.975974299 |
| L1CAM     | 0.000744711  | 6.573993908 | 0.976047423 |
| LOC647972 | -0.000784403 | 6.010138477 | 0.9762552   |
| C20ORF197 | -0.00078743  | 6.176272844 | 0.976358383 |
| LOC652753 | 0.000762625  | 6.056514979 | 0.976384486 |
| LOC146177 | -0.000895325 | 6.516288206 | 0.976456168 |
| LOC645438 | 0.0007524    | 6.077822271 | 0.976588506 |
| GSTM3     | -0.002541925 | 8.138034697 | 0.976607029 |
| LOC400955 | -0.000679274 | 6.059816498 | 0.976641334 |
| LOC91431  | -0.000957619 | 6.212767621 | 0.976661068 |
| LOC647206 | -0.000873877 | 6.032581584 | 0.976687576 |
| LOC647400 | 0.000679573  | 6.112691469 | 0.976703957 |
| LOC388381 | 0.000714801  | 6.062399841 | 0.976750738 |
| LOC283152 | 0.000706312  | 6.064643768 | 0.976835138 |
| LOC648979 | -0.000690215 | 6.158815461 | 0.97692236  |
| LOC54103  | 0.000981142  | 6.265198698 | 0.977024277 |
| IGFL2     | 0.000887622  | 6.009550549 | 0.97703018  |
| RFX1      | 0.001766016  | 7.349574019 | 0.97703555  |
| OR111     | 0.000735089  | 5.987707936 | 0.977051931 |
| NKX1-1    | 0.000408517  | 6.087669238 | 0.977063419 |
| KCNK4     | 0.000556319  | 6.153060705 | 0.977116742 |
| EFNA3     | 0.000684735  | 6.024269109 | 0.977195733 |
| LOC643784 | -0.000720427 | 6.058926547 | 0.977251019 |
| C10ORF21  | 0.000752686  | 6.02886     | 0.977376929 |
| LOC152663 | -0.000730197 | 5.955569729 | 0.977627692 |
| MAP7      | -0.000903754 | 6.654922384 | 0.977773159 |
| C10ORF82  | -0.001058173 | 5.961811501 | 0.977839788 |
| LOC649320 | 0.00063448   | 6.045504715 | 0.977865225 |
| LOC650867 | 0.000701251  | 6.07361862  | 0.977867516 |
| ADAD2     | 0.001099945  | 6.183271879 | 0.977986643 |
| LOC343384 | -0.00063767  | 6.055764397 | 0.978000388 |
| RHO       | 0.00066549   | 6.004378687 | 0.978024483 |
| LOC653061 | 0.00063465   | 5.886177563 | 0.978079654 |
| CDR1      | -0.00050705  | 5.978186663 | 0.978244158 |
| ZCCHC16   | 0.000544607  | 6.15607211  | 0.978248331 |
| LOC644241 | -0.000800324 | 6.068103844 | 0.978281251 |
| NOSIP     | -0.001769432 | 9.550596945 | 0.978313343 |
| KRTAP10-5 | 0.001023998  | 5.978063372 | 0.978324977 |
| LOC652641 | -0.000686627 | 5.939033541 | 0.978388696 |
| LOC642130 | -0.000634961 | 6.058301244 | 0.978518015 |
| TRIM62    | 0.001156193  | 6.069260736 | 0.978520007 |
| LOC649620 | -0.000608121 | 6.204726958 | 0.978570204 |
| ZIC3      | -0.001076259 | 5.913070656 | 0.978642983 |
| EME1      | -0.000888924 | 6.130303537 | 0.978649509 |
| LOC338586 | 0.000686864  | 5.939706425 | 0.978663482 |
| LOC647961 | -0.000790153 | 6.094486741 | 0.978788458 |
| H1FNT     | -0.000673466 | 6.112861876 | 0.97884599  |
| LOC649686 | -0.000661954 | 6.082050872 | 0.978884377 |



## DEG.infomation

|           |              |             |             |
|-----------|--------------|-------------|-------------|
| TNFRSF11A | -0.000813013 | 5.959962526 | 0.978906912 |
| LOC654126 | 0.000368508  | 6.192360069 | 0.978927588 |
| SSX4      | -0.000330969 | 6.08475131  | 0.979169189 |
| LOC652593 | -0.000705952 | 5.978452282 | 0.979220083 |
| GINS1     | -0.000980929 | 6.01594541  | 0.979284024 |
| LOC644889 | 0.000705689  | 6.172593597 | 0.979311706 |
| LOC439914 | 0.000760911  | 5.960638058 | 0.979363252 |
| LOC440956 | -0.000619736 | 6.069642959 | 0.97945059  |
| LOC389458 | 0.000727481  | 6.086067513 | 0.979489834 |
| LOC650028 | -0.000659371 | 6.066964801 | 0.979662897 |
| EPS8L2    | -0.000474732 | 6.045815898 | 0.979663916 |
| LOC650210 | 0.000560866  | 5.969908861 | 0.97978151  |
| XCL1      | -0.000420808 | 5.975798661 | 0.979825101 |
| LOC644222 | 0.00063637   | 6.20053963  | 0.979865741 |
| OR10J3    | -0.000657567 | 5.973526773 | 0.979869457 |
| KARS      | -0.000927843 | 8.762450459 | 0.979927929 |
| LOC644782 | 0.000579163  | 5.985537449 | 0.980023947 |
| KLK5      | 0.000430349  | 5.953370735 | 0.980171196 |
| LOC642161 | 0.000536506  | 6.141269511 | 0.98021395  |
| LOC644704 | 0.000617878  | 5.979753914 | 0.98024151  |
| S100A7    | 0.000658092  | 5.896279428 | 0.980254755 |
| MSX2P1    | -0.000463041 | 6.057214992 | 0.980281502 |
| LOC646041 | 0.00059964   | 6.067743704 | 0.980285263 |
| LOC649466 | -0.000617661 | 6.174579375 | 0.980342129 |
| NDUFB2    | -0.001273894 | 12.75045984 | 0.980343265 |
| KRTAP19-1 | 0.00068934   | 5.964320205 | 0.980355114 |
| F3        | 0.00282099   | 8.203962681 | 0.980386344 |
| LOC644802 | -0.000743887 | 5.893023195 | 0.980397704 |
| LOC642229 | -0.000583991 | 6.189016655 | 0.980426868 |
| TBX21     | 0.001146739  | 5.996051117 | 0.980468662 |
| FLJ44674  | 0.000706167  | 6.123457343 | 0.980483004 |
| TRIM42    | 0.000646169  | 6.105307387 | 0.980597288 |
| XPO5      | -0.001066643 | 7.432270852 | 0.980636362 |
| TRAF2     | 0.000869279  | 6.497726083 | 0.98064361  |
| NDUFS5    | -0.001023728 | 13.17157783 | 0.980643631 |
| HABP2     | -0.000608678 | 5.980137425 | 0.980665995 |
| SPINK9    | 0.000481885  | 6.133185797 | 0.980695691 |
| LOC642819 | -0.000627766 | 6.088194943 | 0.980728144 |
| DHRS13    | 0.001075272  | 6.193006802 | 0.980788238 |
| LOC650280 | 0.000614879  | 6.023628454 | 0.98104093  |
| LOC646573 | 0.00051815   | 6.140732069 | 0.981289491 |
| DEPDC5    | 0.000414169  | 6.300541146 | 0.981315035 |
| LOC652839 | 0.000623562  | 6.146522661 | 0.981349172 |
| L1TD1     | 0.000800443  | 6.04132169  | 0.981376531 |
| ABHD14A   | 0.001351774  | 8.313014578 | 0.981441884 |
| GPR113    | -0.000689464 | 6.428978999 | 0.981515496 |
| OXTR      | -0.000924395 | 6.12485495  | 0.98153489  |
| NGDN      | 0.000871155  | 7.951708356 | 0.981694499 |
| PIGY      | 0.001454647  | 10.3705286  | 0.981786575 |
| KIAA0888  | 0.000378171  | 6.115129288 | 0.981808669 |
| CMKLR1    | -0.000679536 | 6.239456721 | 0.981868637 |

## DEG.infomation

|               |              |             |             |
|---------------|--------------|-------------|-------------|
| LACRT         | 0.000545524  | 5.977099516 | 0.981921408 |
| HTR1D         | 0.000741113  | 6.188086431 | 0.982230811 |
| ZNF417        | -0.000643759 | 6.408628403 | 0.982422815 |
| OR11L1        | -0.000873436 | 6.878312399 | 0.982463335 |
| LOC654259     | -0.0006468   | 6.243133864 | 0.982503025 |
| LOC389963     | 0.000565104  | 5.960111715 | 0.982595218 |
| LOC342934     | -0.000536006 | 6.218211993 | 0.982611749 |
| CAPNS2        | 0.000597734  | 6.032039647 | 0.982622841 |
| PAX4          | 0.000597843  | 6.185750409 | 0.982623498 |
| LOC646038     | -0.000702323 | 6.123435417 | 0.982632656 |
| LOC646200     | 0.001065711  | 11.78653733 | 0.98265399  |
| LOC650293     | 0.000465151  | 6.171879631 | 0.982741456 |
| LOC647841     | 0.000768418  | 5.950274207 | 0.982775368 |
| KIAA1614      | -0.000609772 | 6.147111918 | 0.982793676 |
| XDH           | 0.000587707  | 5.887006327 | 0.98282376  |
| GLIS2         | -0.000562147 | 6.022645776 | 0.982913509 |
| NCAPH2        | -0.000627546 | 6.536033468 | 0.982942569 |
| DKFZP686K1684 | -0.00047205  | 6.30914153  | 0.983004703 |
| LOC646806     | -0.000490255 | 6.059345477 | 0.983010694 |
| LOC646040     | 0.000524799  | 6.025518623 | 0.983044278 |
| LOC653428     | 0.000525542  | 6.09758501  | 0.983140693 |
| NEURL         | 0.000625665  | 6.138203706 | 0.983204452 |
| LOC729193     | -0.000329034 | 5.969588872 | 0.983225644 |
| CNBD1         | 0.000508189  | 5.923916889 | 0.983338149 |
| CRHR1         | -0.000623697 | 6.966080136 | 0.983614482 |
| TPM1          | 0.001065935  | 13.83932126 | 0.983718973 |
| RNF151        | -0.000382459 | 5.933099781 | 0.983825573 |
| CSRP2BP       | 0.000548362  | 7.413343057 | 0.983928781 |
| CYP4F8        | 0.000538555  | 5.966624108 | 0.983951736 |
| C1ORF104      | 0.000325986  | 6.317626809 | 0.984001391 |
| LOC653253     | 0.000590622  | 6.355658774 | 0.984052523 |
| KLHL35        | -0.000656534 | 6.75769044  | 0.984067442 |
| PATL1         | -0.000936959 | 8.974682415 | 0.98409531  |
| CA6           | 0.0005681    | 6.32554212  | 0.984146786 |
| BRS3          | 0.000513023  | 6.030900264 | 0.984174499 |
| HSPB8         | -0.001414812 | 12.24499653 | 0.984228731 |
| PCSK9         | -0.000567789 | 6.130177398 | 0.984249274 |
| KCNQ4         | -0.000305613 | 6.041004643 | 0.984274079 |
| LOC644074     | -0.000498726 | 5.991096733 | 0.98427775  |
| LOC388526     | 0.000455224  | 6.186290568 | 0.984327798 |
| LOC127150     | 0.000520956  | 6.102739497 | 0.98438461  |
| LOC284751     | 0.000443658  | 5.983339369 | 0.984386453 |
| LOC646145     | -0.000771058 | 6.218704186 | 0.98440786  |
| MCCC2         | 0.001400413  | 7.383414675 | 0.984479886 |
| GJB1          | 0.000583779  | 6.125946192 | 0.984503673 |
| BFAR          | -0.001224087 | 7.905420019 | 0.984509956 |
| FGD1          | -0.000760173 | 7.080161644 | 0.984713273 |
| ZNF313        | -0.001175269 | 9.825285575 | 0.984726902 |
| LSR           | -0.000410102 | 6.18637425  | 0.98477315  |
| RIPK4         | 0.000527458  | 6.578501897 | 0.984779807 |
| PARP6         | -0.000470714 | 6.749103025 | 0.984932499 |

## DEG.infomation

|              |              |             |             |
|--------------|--------------|-------------|-------------|
| UNC5C        | -0.000434461 | 6.46892932  | 0.984971288 |
| LOC648699    | 0.000499959  | 6.113670889 | 0.985005136 |
| TFAP2B       | 0.000342197  | 6.018597066 | 0.985088635 |
| KLC3         | 0.00026764   | 6.039531003 | 0.985185397 |
| DKFZP434L187 | 0.000578009  | 6.063456064 | 0.985293238 |
| LOC647343    | -0.000435902 | 6.02939884  | 0.985334021 |
| CBR1         | 0.00073495   | 7.348634498 | 0.985339406 |
| TEKT2        | -0.000470775 | 6.276571505 | 0.985407901 |
| LOC642194    | 0.000455966  | 6.056847406 | 0.985412058 |
| LOC644262    | 0.000419117  | 5.958725751 | 0.985480337 |
| SLC22A9      | -0.00032857  | 5.999011517 | 0.985514506 |
| PLEKHH3      | -0.001101489 | 7.525589448 | 0.985557902 |
| LOC441151    | 0.000514565  | 6.468446288 | 0.985719131 |
| TTY15        | 0.00057033   | 6.061911375 | 0.985743067 |
| SLC22A10     | -0.000252016 | 5.960743029 | 0.985744955 |
| FAM156A      | -0.000555443 | 7.265621183 | 0.985799999 |
| LOC643189    | -0.00040454  | 5.952939594 | 0.985820804 |
| LOC100101120 | 0.000387444  | 6.076722127 | 0.98590218  |
| LOC646582    | 0.00043707   | 6.008976868 | 0.986118885 |
| ID2B         | 0.000536803  | 5.978985293 | 0.986223377 |
| C5ORF36      | 0.000331402  | 5.982901675 | 0.986241114 |
| LOC646130    | 0.000412426  | 6.086398182 | 0.98643248  |
| NEO1         | -0.000821265 | 7.559363827 | 0.986478074 |
| MT1L         | -0.000510109 | 6.162307889 | 0.986561935 |
| DNAJC14      | 0.00055797   | 7.219294484 | 0.986635655 |
| FBXL12       | -0.000789112 | 6.574489959 | 0.986861243 |
| ST8SIA6      | -0.000382523 | 6.205444301 | 0.986904467 |
| C14ORF165    | -0.000531728 | 6.053258445 | 0.98703816  |
| SMEK1        | 0.000470149  | 6.003761008 | 0.987048552 |
| PECR         | -0.000717074 | 6.727684207 | 0.987176423 |
| LOC652119    | -0.000410987 | 6.077995651 | 0.987182101 |
| LMOD3        | -0.001091063 | 9.728517649 | 0.987191887 |
| LOC652077    | 0.00049942   | 5.870603806 | 0.987274971 |
| C20ORF91     | -0.000349174 | 6.130699295 | 0.987430055 |
| IFIH1        | 0.001275742  | 7.394975299 | 0.987627114 |
| RRH          | -0.000343305 | 5.925913028 | 0.987669658 |
| EHD2         | 0.000818767  | 7.334258062 | 0.987688332 |
| TRIAP1       | -0.000538745 | 7.982065058 | 0.987699379 |
| LOC648111    | 0.000345865  | 6.024794433 | 0.987731761 |
| LOC646943    | 0.000523134  | 5.942247199 | 0.987867698 |
| CARD10       | -0.000835268 | 8.258450872 | 0.987868656 |
| IL2          | -0.00037294  | 6.025631254 | 0.987977067 |
| LOC645626    | -0.0003409   | 6.112945357 | 0.988007003 |
| PCDHGA6      | -0.00036433  | 6.12374964  | 0.988106823 |
| HEPACAM2     | -0.000231411 | 6.038021761 | 0.988151583 |
| ZNF99        | 0.000433376  | 6.230774878 | 0.9881535   |
| SPANXB2      | -0.000304364 | 6.038115197 | 0.988181263 |
| LOC650390    | -0.000325222 | 6.128084511 | 0.988744119 |
| LOC651849    | 0.000441596  | 6.101555266 | 0.988773679 |
| LOC653410    | 0.000341979  | 6.109782587 | 0.988793259 |
| ZNF645       | 0.000354472  | 5.941401605 | 0.988885108 |

## DEG.infomation

|           |              |             |             |
|-----------|--------------|-------------|-------------|
| LOC651787 | -0.000344205 | 6.171838645 | 0.988906928 |
| TRPV6     | -0.000200337 | 6.052616943 | 0.988929947 |
| ZNF409    | -0.000277084 | 6.008628598 | 0.989010361 |
| LOC652610 | 0.000363287  | 5.986692888 | 0.989043456 |
| LOC650482 | 0.000413375  | 5.971681976 | 0.989071464 |
| CDH8      | 0.000392741  | 5.960622283 | 0.989178746 |
| ONECUT2   | 0.000171116  | 6.050410783 | 0.989207283 |
| FAM153A   | 0.000248307  | 6.127249421 | 0.989221428 |
| LOC651213 | 0.00030981   | 6.234396362 | 0.989233725 |
| FDXR      | 0.000477851  | 5.984984546 | 0.989289872 |
| CSF2      | 0.000364789  | 6.006573136 | 0.989293061 |
| GAGE2C    | -0.000363566 | 6.086683235 | 0.989301397 |
| KREMEN2   | -0.000186548 | 6.133297708 | 0.989356116 |
| HGSNAT    | 0.00031907   | 6.254500021 | 0.989373213 |
| SCAND3    | -0.000301347 | 6.134988944 | 0.989379716 |
| LOC389217 | -0.000282499 | 5.923535308 | 0.989409549 |
| DEFA4     | 0.000367228  | 6.353741898 | 0.989435212 |
| LOC441395 | 0.000374172  | 5.934185449 | 0.98944845  |
| PCDHA11   | 0.000324662  | 6.204697824 | 0.989502817 |
| KRTAP19-7 | 0.000409784  | 6.186309776 | 0.989519251 |
| SLC22A8   | 0.000392597  | 5.943812243 | 0.989557209 |
| XCL2      | 0.000360949  | 5.930224697 | 0.989897708 |
| GFRAL     | -0.000252411 | 5.941890469 | 0.98994447  |
| LOC643426 | 0.000282138  | 6.011236326 | 0.990015723 |
| LOC647335 | 0.000280178  | 6.129663683 | 0.990080536 |
| C11ORF34  | 0.000219196  | 6.053631908 | 0.99010204  |
| LOC729396 | 0.000317367  | 5.999104865 | 0.990179644 |
| LOC651859 | 0.000426908  | 5.944862801 | 0.990336668 |
| PKD2L2    | -0.000288663 | 6.047498014 | 0.990378778 |
| LIMS3     | 0.000307236  | 6.034986235 | 0.990392204 |
| FAM40A    | 0.000569745  | 6.65827677  | 0.990401406 |
| LOC642606 | 0.000334677  | 5.948636935 | 0.990505925 |
| TAS2R13   | -0.000280831 | 5.946951255 | 0.990510309 |
| EPPK1     | -0.00040386  | 6.015967992 | 0.99055174  |
| LOC651137 | 0.000201553  | 6.217677983 | 0.990572444 |
| GPR45     | -0.000342819 | 5.920666487 | 0.990632877 |
| ODAM      | 0.000349015  | 6.08502338  | 0.990883162 |
| MIST      | -0.000262031 | 6.100873781 | 0.99107338  |
| FAM184A   | 0.000333747  | 6.364902816 | 0.99121377  |
| LOC647680 | -0.000281152 | 6.126749093 | 0.991215576 |
| LOC651341 | 0.000283213  | 5.94011266  | 0.99133339  |
| LOC643107 | -0.000318066 | 5.937821237 | 0.991422006 |
| MYEF2     | -0.000425465 | 5.963946173 | 0.991503184 |
| LOC400793 | -0.000286992 | 6.042434694 | 0.991567925 |
| LOC642587 | 0.000223677  | 5.974960702 | 0.991587276 |
| TBC1D1    | 0.000346215  | 6.514906817 | 0.991594681 |
| MRPL42P5  | -0.000283146 | 6.104523508 | 0.991669612 |
| FLJ16686  | 0.000233836  | 6.181002855 | 0.991824244 |
| C9ORF100  | -0.000164494 | 6.059190036 | 0.991928961 |
| LOC642869 | -0.000236783 | 6.037025418 | 0.991993417 |
| SHISA4    | 0.000356362  | 6.482682501 | 0.992044222 |

## DEG.infomation

|           |              |             |             |
|-----------|--------------|-------------|-------------|
| LOC652661 | 0.00023252   | 6.099388017 | 0.992062496 |
| ZNF141    | 0.000262289  | 6.033746471 | 0.992091593 |
| RNF152    | -0.000191589 | 6.154091807 | 0.99214409  |
| SLC26A3   | -0.000252131 | 5.961404059 | 0.992165591 |
| LOC652350 | 0.000243927  | 6.11276418  | 0.992231415 |
| LOC55908  | -0.000251498 | 6.420210062 | 0.992311687 |
| LOC651966 | -0.000235506 | 6.052118335 | 0.992369076 |
| C4BPB     | -0.000205549 | 6.109965821 | 0.992407011 |
| LOC653437 | -0.000247945 | 5.971214362 | 0.992610211 |
| NEUROD1   | 0.000214448  | 6.067660247 | 0.9926233   |
| KIAA0125  | -0.000224467 | 6.005637093 | 0.992658746 |
| KCNMB3    | 0.000158573  | 6.330352156 | 0.992813346 |
| LOC344967 | 0.000215628  | 5.941824259 | 0.992827836 |
| LOC391609 | -0.000225933 | 5.996142453 | 0.992939757 |
| DEFB114   | 0.000152159  | 5.959841599 | 0.992957554 |
| PGM5P2    | 0.000202598  | 6.154849194 | 0.993011587 |
| FLJ14082  | 0.000261906  | 6.289712261 | 0.993067048 |
| LOC344165 | 0.000219528  | 6.074827122 | 0.993071534 |
| LOC653547 | -0.000217259 | 6.054166249 | 0.993092249 |
| C20ORF51  | -0.000229709 | 6.232808228 | 0.993169921 |
| CLPS      | 0.000217818  | 5.93972797  | 0.993180073 |
| LOC442710 | -0.00018389  | 6.020993208 | 0.993201652 |
| FLJ16331  | -0.000194661 | 6.000119982 | 0.993253764 |
| C3ORF47   | 0.000212376  | 6.047489109 | 0.993347971 |
| LOC643824 | 0.000149257  | 6.110801426 | 0.993412294 |
| QRICH2    | -0.000182342 | 6.020740038 | 0.993439825 |
| ZMYND8    | 0.000275846  | 7.120878167 | 0.993508209 |
| MUC20     | 0.000401505  | 6.335476089 | 0.993539684 |
| TMED8     | 0.000229885  | 6.131728052 | 0.993601192 |
| MDC1      | -0.000542085 | 8.078388098 | 0.993714126 |
| OTUD1     | 0.000832362  | 8.151634285 | 0.993877604 |
| ZIK1      | 0.000200746  | 6.630312898 | 0.994013548 |
| LOC642744 | 0.000174199  | 6.014278557 | 0.99405399  |
| TDGF3     | 0.000167442  | 6.002427732 | 0.994103037 |
| MUC5B     | 0.000156565  | 6.101221774 | 0.99416971  |
| FKSG44    | 0.000228811  | 6.05431469  | 0.994179828 |
| FABP9     | -0.000124469 | 6.01032858  | 0.994256894 |
| LMAN1L    | 0.000290889  | 6.31608676  | 0.994328078 |
| ZBTB32    | 0.000165265  | 6.169072571 | 0.994346607 |
| LOC645090 | 0.000179268  | 6.101334034 | 0.994348953 |
| HCRT      | 0.00021323   | 6.238201142 | 0.994372536 |
| AACSL     | -0.000206736 | 6.260631164 | 0.994635557 |
| COPA      | 0.000342122  | 10.82282138 | 0.994646879 |
| LOC391722 | -0.000141912 | 6.03750039  | 0.994685517 |
| KCNJ4     | 0.00054249   | 7.479535715 | 0.994712928 |
| MMP13     | -0.000176494 | 5.9566592   | 0.99476609  |
| CCT8L2    | -0.00018248  | 5.878175484 | 0.994772859 |
| MGC34829  | 0.000157668  | 5.995277465 | 0.994945847 |
| TRIM49    | -0.000205355 | 7.049213823 | 0.994996934 |
| DCPS      | -0.000258295 | 7.040948278 | 0.995025876 |
| PLSCR4    | 0.000397361  | 7.833396537 | 0.995114663 |

## DEG.infomation

|           |              |             |             |
|-----------|--------------|-------------|-------------|
| NOL9      | 0.000188552  | 6.113600618 | 0.995208621 |
| POF1B     | -0.000248901 | 6.026933872 | 0.995404626 |
| LOC646603 | -0.000118404 | 6.11290652  | 0.995466273 |
| VCX2      | 6.12229E-05  | 6.058581595 | 0.99547683  |
| FBXL8     | 0.000193953  | 6.350429601 | 0.995484057 |
| LOC644388 | -0.000141275 | 6.038038457 | 0.995499311 |
| GDPD2     | -0.000138073 | 6.123005274 | 0.995586391 |
| LOC643605 | 0.000137507  | 6.043953894 | 0.995905417 |
| LOC401778 | 0.000117593  | 6.028785898 | 0.995929105 |
| PWWP2     | -0.000139082 | 6.205929377 | 0.995942889 |
| LOC641964 | -0.000105378 | 6.122913465 | 0.995957204 |
| DNAH8     | -0.000128681 | 6.086291211 | 0.996100553 |
| STIM1     | -0.00026541  | 7.218790121 | 0.996134388 |
| C6ORF190  | 0.000144691  | 6.016612971 | 0.996171338 |
| LOC652438 | -8.23748E-05 | 6.099004207 | 0.996203105 |
| C20ORF75  | -0.000112344 | 6.175321627 | 0.996296835 |
| ZBTB12    | -0.000113122 | 5.918672511 | 0.996305357 |
| LOC642348 | 0.000111249  | 6.211633986 | 0.996336639 |
| LOC643799 | -0.000116444 | 5.972033516 | 0.996608547 |
| GLDC      | -9.52367E-05 | 5.957091573 | 0.996809146 |
| SMUG1     | 0.000153887  | 8.555872589 | 0.996811639 |
| LOC391352 | 0.000110918  | 6.300151921 | 0.996822122 |
| MGC35030  | 9.37911E-05  | 6.043008999 | 0.996868956 |
| OR10J1    | -6.96525E-05 | 6.213267087 | 0.996961324 |
| LOC401703 | -9.51329E-05 | 6.109769159 | 0.996966463 |
| LOC646082 | -8.01787E-05 | 6.152520374 | 0.996977155 |
| CCDC83    | -0.000104871 | 5.875446954 | 0.996995364 |
| LOC642233 | 9.27803E-05  | 6.273067104 | 0.997207174 |
| MTL5      | -6.87249E-05 | 5.977786645 | 0.997290776 |
| OR12D2    | -9.63455E-05 | 6.156099326 | 0.997343931 |
| TPSG1     | -7.80097E-05 | 6.058652414 | 0.997660024 |
| DAAM1     | 0.000166992  | 8.884410034 | 0.997745681 |
| LOC643278 | -7.47036E-05 | 5.961548304 | 0.997746042 |
| CDK3      | -6.14412E-05 | 6.238650482 | 0.997823761 |
| RPE65     | -6.94684E-05 | 5.973738701 | 0.997895393 |
| LOC648823 | 6.5994E-05   | 5.986208948 | 0.997899633 |
| MMP3      | 7.95247E-05  | 6.25351666  | 0.997980772 |
| FZD10     | 7.39207E-05  | 6.155209412 | 0.998001425 |
| PLLP      | 8.33915E-05  | 6.655410125 | 0.998171741 |
| KRTAP4-7  | -3.81608E-05 | 6.109131757 | 0.998187794 |
| LOC645645 | 7.50302E-05  | 5.891655868 | 0.998257615 |
| KCNK10    | 3.25477E-05  | 6.19755187  | 0.998385719 |
| LOC651597 | -4.50426E-05 | 5.967428096 | 0.998506145 |
| DLGAP4    | 8.02879E-05  | 7.103904596 | 0.998533215 |
| LOC730760 | -5.59457E-05 | 5.982939457 | 0.998535361 |
| LRRC66    | 6.03586E-05  | 5.858038396 | 0.998615881 |
| LOC653264 | 3.07822E-05  | 6.110198389 | 0.998621785 |
| RHOBTB3   | 7.83211E-05  | 9.92935754  | 0.99869974  |
| LOC653421 | -4.88436E-05 | 6.528790557 | 0.998794937 |
| LOC646135 | -4.83741E-05 | 7.428804797 | 0.999007546 |
| ALOX12P2  | 2.37242E-05  | 6.032141989 | 0.999148512 |

DEG.infomation

|           |              |             |             |
|-----------|--------------|-------------|-------------|
| LOC647928 | 1.95719E-05  | 6.157428676 | 0.999373117 |
| TEC       | -2.06007E-05 | 6.217661694 | 0.99947821  |
| LOC440804 | -1.58945E-05 | 6.193332766 | 0.999547369 |
| UBAP2     | -3.12542E-05 | 6.784012149 | 0.999635396 |
| CASP5     | 7.78138E-06  | 6.026896231 | 0.999734311 |
| ZZEF1     | -1.46667E-05 | 8.355932917 | 0.999764419 |
| NPBWR2    | -3.52425E-06 | 6.204527585 | 0.999891964 |
| KDELC1    | -2.57909E-06 | 6.303420206 | 0.999926415 |

## DEG.infomation

| adj.P.Val   | group | name      |
|-------------|-------|-----------|
| 1.31125E-42 | down  | TUBA3E    |
| 1.05801E-41 | down  | CEBPD     |
| 1.21262E-41 | down  | TUBA3C    |
| 1.93398E-41 | down  | ZFP36     |
| 2.02818E-41 | down  | RASD1     |
| 1.7549E-40  | down  | TUBA3D    |
| 9.03533E-40 | down  | CDC42EP4  |
| 1.84907E-38 | down  | SERPINA3  |
| 1.6462E-37  | down  | AXUD1     |
| 8.52808E-37 | down  | S100A9    |
| 9.12961E-37 | down  | MYH6      |
| 1.6114E-36  | down  | FCN3      |
| 3.14881E-36 | down  | MT1M      |
| 7.19057E-36 | down  | LYVE1     |
| 9.01884E-36 | down  | MAP3K6    |
| 7.63454E-35 | down  | PRKCD     |
| 2.33699E-34 | down  | CD163     |
| 5.58981E-34 | up    | YPEL2     |
| 6.38051E-34 | down  | S1PR3     |
| 7.11333E-34 | down  | C1R       |
| 7.34986E-33 | down  | FPR1      |
| 2.26465E-32 | down  | FCER1G    |
| 5.38251E-32 | down  | FKBP5     |
| 6.83616E-32 | up    | PIK3IP1   |
| 8.95267E-32 | up    | AP3M2     |
| 9.17841E-32 | down  | MYC       |
| 1.65032E-31 | down  | MT1X      |
| 1.98916E-31 | down  | S100A8    |
| 5.98534E-31 | down  | MAFB      |
| 9.09577E-31 | down  | CMTM7     |
| 1.28404E-30 | down  | SLA       |
| 1.28404E-30 | up    | JAK2      |
| 1.70417E-30 | up    | SCN2B     |
| 2.02078E-30 | down  | FES       |
| 2.60585E-30 | up    | DYRK1B    |
| 5.87268E-30 | down  | ZDHHC9    |
| 5.87268E-30 | down  | GALK1     |
| 6.06155E-30 | up    | PROS1     |
| 6.16656E-30 | up    | CHN1      |
| 6.6773E-30  | down  | NFKBIZ    |
| 6.81649E-30 | up    | C7ORF41   |
| 8.43126E-30 | down  | TIPARP    |
| 1.11848E-29 | down  | SLCO4A1   |
| 1.40484E-29 | down  | LOC653888 |
| 1.83588E-29 | down  | CORO1A    |
| 3.26025E-29 | down  | ALOX5     |
| 5.03032E-29 | down  | CTSC      |
| 5.03032E-29 | up    | SORBS2    |
| 6.422E-29   | down  | CD97      |



## DEG.infomation

|             |        |           |
|-------------|--------|-----------|
| 6.67241E-29 | down   | XLKD1     |
| 2.23004E-28 | down   | STAT3     |
| 2.99682E-28 | stable | SEC14L1   |
| 3.48195E-28 | down   | MT1A      |
| 3.69284E-28 | down   | PIM1      |
| 5.99931E-28 | down   | ARPC1B    |
| 8.77874E-28 | down   | IFITM2    |
| 8.96698E-28 | down   | HCK       |
| 9.84662E-28 | down   | EBI2      |
| 1.11032E-27 | down   | WAS       |
| 1.44797E-27 | down   | ITGB2     |
| 1.63945E-27 | up     | SMOC2     |
| 2.10448E-27 | down   | F13A1     |
| 2.18533E-27 | down   | CD248     |
| 2.29467E-27 | down   | RANGAP1   |
| 2.7998E-27  | down   | LCP1      |
| 2.84114E-27 | down   | IFITM3    |
| 3.73716E-27 | up     | SMYD2     |
| 4.16453E-27 | down   | HCLS1     |
| 4.96558E-27 | down   | SLCO2B1   |
| 4.96558E-27 | down   | IL18R1    |
| 5.94841E-27 | down   | BTG2      |
| 7.00224E-27 | down   | CHRD12    |
| 8.14123E-27 | down   | MGST1     |
| 1.19652E-26 | up     | C10ORF71  |
| 1.30934E-26 | up     | IRX6      |
| 1.52383E-26 | down   | INPP1     |
| 1.77044E-26 | down   | IL13RA1   |
| 1.81072E-26 | down   | MGC42367  |
| 1.81072E-26 | up     | SAP18     |
| 1.96609E-26 | down   | CHST7     |
| 2.26216E-26 | down   | MFSD10    |
| 2.74118E-26 | down   | BCL6      |
| 5.79773E-26 | up     | LMOD2     |
| 5.89469E-26 | down   | NFKBIA    |
| 8.64388E-26 | down   | TUBB2C    |
| 9.09781E-26 | down   | LOC653879 |
| 1.20804E-25 | stable | MNS1      |
| 1.21671E-25 | down   | C1QC      |
| 1.2368E-25  | down   | SLC15A3   |
| 1.306E-25   | down   | MT2A      |
| 1.36391E-25 | down   | NNMT      |
| 1.39812E-25 | down   | CYBA      |
| 1.77625E-25 | down   | C1ORF162  |
| 1.77625E-25 | down   | C1QB      |
| 1.78362E-25 | down   | RHBDF2    |
| 1.79123E-25 | down   | DOCK2     |
| 1.79123E-25 | down   | LAPTM5    |
| 1.8074E-25  | up     | ZNF415    |
| 2.22683E-25 | stable | ZGPAT     |
| 2.39252E-25 | up     | HEG1      |

## DEG.infomation

|             |        |           |
|-------------|--------|-----------|
| 2.46458E-25 | down   | LRRRC8A   |
| 2.53019E-25 | down   | CEBPB     |
| 3.22668E-25 | down   | CD14      |
| 3.74624E-25 | stable | C5ORF4    |
| 3.86409E-25 | down   | FGD2      |
| 4.05986E-25 | down   | CD68      |
| 4.95262E-25 | up     | MBP       |
| 5.11258E-25 | stable | ZNF627    |
| 5.33433E-25 | down   | S100A10   |
| 5.37897E-25 | up     | MASP1     |
| 5.67607E-25 | down   | TKT       |
| 5.76091E-25 | down   | VAMP8     |
| 5.9827E-25  | down   | TSPYL2    |
| 6.52119E-25 | down   | TDRD9     |
| 6.78435E-25 | down   | SRGN      |
| 7.13827E-25 | down   | ALOX5AP   |
| 7.13827E-25 | up     | FRZB      |
| 7.67005E-25 | up     | IVNS1ABP  |
| 7.93134E-25 | down   | LILRA5    |
| 9.03606E-25 | up     | C14ORF132 |
| 9.16317E-25 | up     | FAM110B   |
| 9.47685E-25 | down   | SLC12A9   |
| 1.00394E-24 | down   | HAVCR2    |
| 1.02868E-24 | stable | MTCH1     |
| 1.04612E-24 | down   | GPR56     |
| 1.19821E-24 | up     | CCND2     |
| 1.47476E-24 | stable | ARHGAP4   |
| 1.55137E-24 | down   | CAPN1     |
| 1.61349E-24 | down   | MVP       |
| 1.77642E-24 | up     | LYPLAL1   |
| 1.86364E-24 | down   | OSR1      |
| 2.24815E-24 | down   | CD209     |
| 2.35664E-24 | stable | SYF2      |
| 2.55941E-24 | up     | CYP2J2    |
| 2.69815E-24 | down   | IFI30     |
| 3.44184E-24 | up     | ACE2      |
| 3.5406E-24  | up     | SORBS1    |
| 3.5406E-24  | up     | DDIT3     |
| 3.55761E-24 | stable | LILRB5    |
| 3.65469E-24 | up     | ATPIF1    |
| 3.75385E-24 | up     | PRICKLE1  |
| 3.75924E-24 | down   | HES6      |
| 4.24537E-24 | down   | SEMA4B    |
| 4.53638E-24 | stable | RASSF1    |
| 4.56395E-24 | down   | M6PRBP1   |
| 5.0759E-24  | up     | C8ORF47   |
| 5.29108E-24 | down   | NKD2      |
| 5.29108E-24 | down   | GPR172A   |
| 5.30491E-24 | up     | KIAA1853  |
| 5.74285E-24 | down   | OSMR      |
| 6.35782E-24 | stable | PUS1      |

## DEG.infomation

|             |        |           |
|-------------|--------|-----------|
| 1.07062E-23 | stable | ZNF187    |
| 1.08818E-23 | stable | TCEAL8    |
| 1.08818E-23 | down   | TUBB      |
| 1.73407E-23 | stable | INTU      |
| 1.73407E-23 | down   | GNA15     |
| 1.73407E-23 | up     | ANKMY2    |
| 1.87291E-23 | down   | SELS      |
| 1.879E-23   | up     | SDSL      |
| 1.90489E-23 | stable | UCHL5IP   |
| 2.33773E-23 | stable | GATA2     |
| 2.37258E-23 | up     | HMG2      |
| 2.49546E-23 | stable | VPS41     |
| 2.80592E-23 | up     | C5ORF23   |
| 3.15773E-23 | down   | GRASP     |
| 3.17883E-23 | up     | YPEL1     |
| 3.25983E-23 | stable | CNDP2     |
| 3.84129E-23 | up     | LOC148915 |
| 4.12973E-23 | up     | SVIL      |
| 5.03676E-23 | down   | MAP3K8    |
| 6.44551E-23 | down   | MIDN      |
| 7.34439E-23 | down   | SGK       |
| 9.56471E-23 | up     | RASL11B   |
| 9.83475E-23 | up     | IRX2      |
| 1.67243E-22 | up     | PDE5A     |
| 1.77451E-22 | down   | MPP3      |
| 1.91104E-22 | stable | C20ORF27  |
| 1.91378E-22 | down   | TUBA1B    |
| 2.21806E-22 | up     | PLCE1     |
| 2.47828E-22 | stable | CSNK1D    |
| 2.53761E-22 | stable | IMPDH1    |
| 2.78749E-22 | down   | VSIG4     |
| 3.27755E-22 | down   | FCGR2A    |
| 3.2959E-22  | down   | GFPT2     |
| 3.37065E-22 | up     | KIAA0141  |
| 3.39174E-22 | down   | DCUN1D3   |
| 3.42383E-22 | down   | DDIT4     |
| 3.50259E-22 | down   | LOC255783 |
| 3.54076E-22 | up     | LRRC49    |
| 3.72229E-22 | up     | SLC16A9   |
| 3.80146E-22 | stable | EGLN2     |
| 4.28967E-22 | stable | PPARG     |
| 4.64449E-22 | down   | PLEK      |
| 5.0338E-22  | down   | DUSP1     |
| 5.2301E-22  | down   | IRAK3     |
| 5.29089E-22 | down   | ADAP2     |
| 5.29089E-22 | down   | SLC39A1   |
| 5.41312E-22 | down   | FGR       |
| 5.44821E-22 | down   | PLTP      |
| 5.47173E-22 | stable | TERF1     |
| 5.59847E-22 | down   | MARCO     |
| 5.92953E-22 | stable | FERMT3    |

## DEG.infomation

|             |        |           |
|-------------|--------|-----------|
| 7.47541E-22 | stable | SLC25A28  |
| 8.10407E-22 | down   | C1QTNF1   |
| 8.24651E-22 | up     | TRMT5     |
| 8.67825E-22 | stable | ARS2      |
| 1.39244E-21 | down   | SLC7A1    |
| 1.53985E-21 | up     | CCDC28A   |
| 1.57529E-21 | down   | RARRES1   |
| 1.61371E-21 | up     | LOC730534 |
| 1.69758E-21 | down   | SERPINA5  |
| 1.80178E-21 | up     | SFRP1     |
| 1.84784E-21 | up     | C21ORF34  |
| 1.95472E-21 | down   | TOMM40    |
| 2.00829E-21 | up     | SLC47A1   |
| 2.02143E-21 | down   | SMAP2     |
| 2.05277E-21 | down   | BCL3      |
| 2.30284E-21 | down   | LTBR      |
| 2.60378E-21 | down   | DUSP23    |
| 2.7104E-21  | down   | TYROBP    |
| 2.71706E-21 | up     | CRYM      |
| 3.08308E-21 | down   | HOPX      |
| 3.36166E-21 | up     | DUSP26    |
| 3.41162E-21 | stable | BATF3     |
| 3.5443E-21  | stable | PLAUR     |
| 3.61022E-21 | down   | PDIA3P    |
| 3.63899E-21 | up     | RGS4      |
| 3.68763E-21 | down   | MS4A7     |
| 4.42784E-21 | stable | LOC644128 |
| 4.42883E-21 | up     | CCND1     |
| 4.73142E-21 | stable | ICK       |
| 5.29257E-21 | down   | TUBA1C    |
| 5.48604E-21 | stable | ITGAM     |
| 5.80352E-21 | down   | SNRPB     |
| 6.10799E-21 | down   | DDOST     |
| 6.13578E-21 | up     | EDNRA     |
| 6.64624E-21 | stable | TJP1      |
| 7.11517E-21 | up     | COL21A1   |
| 7.12351E-21 | stable | CAPRIN1   |
| 7.28931E-21 | down   | ECGF1     |
| 7.8606E-21  | down   | ERRFI1    |
| 7.93657E-21 | down   | METTL7B   |
| 8.18698E-21 | down   | PLEKHF1   |
| 9.16924E-21 | up     | PHLDB2    |
| 9.55741E-21 | down   | SH3BGRL3  |
| 1.0374E-20  | down   | C19ORF10  |
| 1.07955E-20 | stable | GLA       |
| 1.1193E-20  | down   | MS4A6A    |
| 1.38939E-20 | stable | FLJ20021  |
| 1.48536E-20 | stable | HRASLS    |
| 1.5173E-20  | stable | CDC42EP2  |
| 1.57519E-20 | stable | NCF4      |
| 1.61518E-20 | stable | EIF4G1    |

## DEG.infomation

|             |        |           |
|-------------|--------|-----------|
| 1.75008E-20 | stable | SLC11A1   |
| 1.75008E-20 | up     | FRMD5     |
| 1.76833E-20 | stable | OMA1      |
| 1.81527E-20 | down   | LOC642031 |
| 1.84652E-20 | stable | EPB41L5   |
| 2.05566E-20 | down   | DHX37     |
| 2.33135E-20 | stable | VPS45     |
| 2.69011E-20 | down   | KLF6      |
| 2.701E-20   | down   | SLC2A1    |
| 2.83328E-20 | down   | SEC61A1   |
| 2.87318E-20 | stable | ZNF20     |
| 3.00226E-20 | stable | HLTF      |
| 3.25651E-20 | stable | SLC39A3   |
| 3.35085E-20 | down   | ENO1      |
| 3.37155E-20 | down   | LOC201140 |
| 3.47085E-20 | stable | KYNU      |
| 3.47085E-20 | up     | ATP1A2    |
| 4.83381E-20 | down   | EML3      |
| 5.20707E-20 | stable | LOC158376 |
| 5.56671E-20 | stable | ATP6V1G2  |
| 5.85073E-20 | down   | TEAD4     |
| 5.9201E-20  | up     | KLHDC9    |
| 5.9201E-20  | stable | FBXO38    |
| 5.9201E-20  | down   | TBXAS1    |
| 6.16325E-20 | stable | TMEM189   |
| 6.211E-20   | stable | SLC1A5    |
| 6.35751E-20 | up     | GATM      |
| 6.72894E-20 | down   | TNFRSF1A  |
| 6.79829E-20 | down   | SERPINH1  |
| 6.81308E-20 | down   | ELL2      |
| 7.08117E-20 | down   | ARPC3     |
| 8.00868E-20 | down   | LOC387763 |
| 9.04877E-20 | down   | COL6A2    |
| 9.04877E-20 | down   | HYAL2     |
| 9.30923E-20 | down   | ATP1A1    |
| 1.07E-19    | stable | ORC3L     |
| 1.08072E-19 | down   | GSDMD     |
| 1.12253E-19 | stable | RASSF9    |
| 1.13538E-19 | stable | CRBN      |
| 1.16081E-19 | down   | LCN6      |
| 1.49878E-19 | stable | CD53      |
| 1.50568E-19 | stable | ACVR1B    |
| 1.61202E-19 | down   | ZNF787    |
| 1.92618E-19 | down   | ZYX       |
| 1.97522E-19 | stable | HM13      |
| 2.1522E-19  | stable | RGS19     |
| 2.32511E-19 | stable | C3        |
| 2.34531E-19 | down   | RDH10     |
| 2.35781E-19 | stable | KLHL12    |
| 2.46109E-19 | up     | C5ORF41   |
| 2.59105E-19 | up     | FZD2      |

## DEG.infomation

|             |        |           |
|-------------|--------|-----------|
| 2.61916E-19 | stable | LOC729843 |
| 2.76699E-19 | stable | PARVG     |
| 2.76699E-19 | down   | FKBP2     |
| 2.78313E-19 | down   | CYBB      |
| 2.90846E-19 | down   | ENDOGL1   |
| 3.0122E-19  | stable | SLC37A4   |
| 3.08088E-19 | up     | PTPN11    |
| 3.15386E-19 | up     | DIO2      |
| 3.32474E-19 | stable | ARHGAP24  |
| 3.39749E-19 | down   | NDUFA4L2  |
| 3.4589E-19  | stable | ASPSCR1   |
| 3.57084E-19 | stable | PGD       |
| 3.68736E-19 | stable | ATP6V0C   |
| 3.69756E-19 | stable | BEST1     |
| 3.69756E-19 | stable | C19ORF51  |
| 4.1152E-19  | stable | MERTK     |
| 4.23488E-19 | down   | GPR4      |
| 4.29705E-19 | stable | PAFAH2    |
| 4.3951E-19  | down   | TMBIM1    |
| 4.71481E-19 | up     | GRM1      |
| 4.8031E-19  | stable | CTSB      |
| 5.02259E-19 | up     | SYNPO2L   |
| 5.48097E-19 | stable | TGFBR2    |
| 5.81928E-19 | down   | CHSY1     |
| 5.81928E-19 | stable | NLGN2     |
| 5.91841E-19 | up     | HEPH      |
| 6.06757E-19 | stable | TNKS1BP1  |
| 6.09057E-19 | down   | AGXT2L1   |
| 6.14287E-19 | stable | ALG3      |
| 6.20658E-19 | stable | LRRC1     |
| 6.74341E-19 | up     | NUP62CL   |
| 7.40277E-19 | up     | HTRA1     |
| 7.56796E-19 | stable | RBPMS2    |
| 8.01372E-19 | stable | TRABD     |
| 8.57845E-19 | stable | DCLK1     |
| 8.99282E-19 | stable | MKNK2     |
| 9.27285E-19 | down   | FKBP11    |
| 9.49007E-19 | up     | COL16A1   |
| 9.82234E-19 | up     | NAP1L3    |
| 1.00546E-18 | stable | RAB28     |
| 1.07225E-18 | stable | KIAA1191  |
| 1.12337E-18 | down   | DARC      |
| 1.23184E-18 | stable | MME       |
| 1.25837E-18 | stable | MAPK13    |
| 1.31237E-18 | stable | C21ORF51  |
| 1.31237E-18 | stable | TMBIM6    |
| 1.3871E-18  | down   | NBPF20    |
| 1.47364E-18 | stable | HSPA1L    |
| 1.49814E-18 | stable | HPCAL1    |
| 1.57748E-18 | stable | DNAJC21   |
| 1.72105E-18 | stable | JAG2      |

## DEG.infomation

|             |        |           |
|-------------|--------|-----------|
| 1.75144E-18 | stable | NPL       |
| 1.7674E-18  | stable | TSPYL3    |
| 1.77892E-18 | stable | ALS2CR13  |
| 2.0742E-18  | up     | HMGB2     |
| 2.077E-18   | up     | LUM       |
| 2.13039E-18 | stable | ATL3      |
| 2.15508E-18 | down   | PLA2G2A   |
| 2.23584E-18 | up     | VWC2      |
| 2.46958E-18 | down   | RRBP1     |
| 2.64084E-18 | up     | S100A13   |
| 2.64546E-18 | up     | HFE2      |
| 2.74784E-18 | stable | RPN1      |
| 2.86891E-18 | down   | HGS       |
| 3.04929E-18 | up     | ECM2      |
| 3.04929E-18 | stable | NIPA2     |
| 3.09215E-18 | up     | EXTL1     |
| 3.19374E-18 | stable | FAM125A   |
| 3.23268E-18 | up     | CBX7      |
| 3.42868E-18 | up     | SLC35F1   |
| 3.53256E-18 | up     | C14ORF179 |
| 3.6365E-18  | stable | BATF      |
| 3.8234E-18  | up     | C5ORF46   |
| 4.12982E-18 | up     | KIAA0644  |
| 4.43329E-18 | stable | ENTPD6    |
| 4.48691E-18 | down   | SNAI2     |
| 4.6457E-18  | down   | OKL38     |
| 4.95342E-18 | up     | APCDD1L   |
| 4.99405E-18 | stable | MEIS1     |
| 5.04749E-18 | stable | UNC84B    |
| 5.10861E-18 | stable | RNF149    |
| 5.10861E-18 | stable | ZNF211    |
| 5.60791E-18 | up     | C1ORF142  |
| 5.64779E-18 | down   | HCST      |
| 5.78976E-18 | up     | C2ORF64   |
| 5.97911E-18 | up     | LOC728473 |
| 6.06737E-18 | stable | DYNC2LI1  |
| 6.81823E-18 | stable | LOC731486 |
| 7.0811E-18  | stable | FBP1      |
| 7.32586E-18 | down   | RGMA      |
| 7.33253E-18 | stable | N6AMT1    |
| 7.81183E-18 | down   | C19ORF59  |
| 8.10695E-18 | down   | BTBD14A   |
| 8.16669E-18 | up     | ASAH1     |
| 8.31118E-18 | stable | CSF3R     |
| 8.3742E-18  | stable | CIDEB     |
| 8.57683E-18 | stable | APBB1IP   |
| 8.62695E-18 | down   | LPCAT3    |
| 8.87312E-18 | stable | EPB41L3   |
| 8.87312E-18 | stable | LMNB2     |
| 9.21908E-18 | stable | HBP1      |
| 9.62128E-18 | up     | PLK2      |

DEG.infomation

|             |        |           |
|-------------|--------|-----------|
| 9.68031E-18 | stable | SERPINA1  |
| 9.93081E-18 | stable | IL18BP    |
| 1.03591E-17 | down   | KCNK12    |
| 1.05678E-17 | up     | KLHL34    |
| 1.0725E-17  | down   | CDR2L     |
| 1.07601E-17 | stable | OSGIN2    |
| 1.08531E-17 | up     | STK38L    |
| 1.14827E-17 | stable | LILRB2    |
| 1.22729E-17 | stable | SLC30A1   |
| 1.30999E-17 | stable | C21ORF63  |
| 1.30999E-17 | up     | FBXO32    |
| 1.32436E-17 | down   | SERPINE1  |
| 1.49993E-17 | up     | LIN9      |
| 1.57613E-17 | stable | CTPS      |
| 1.5843E-17  | down   | PLAU      |
| 1.69941E-17 | stable | ZMYND12   |
| 1.76084E-17 | stable | GPRASP2   |
| 1.76084E-17 | stable | HK3       |
| 1.8696E-17  | down   | CD59      |
| 1.87755E-17 | stable | NR2C1     |
| 2.05051E-17 | down   | ADCY3     |
| 2.17274E-17 | down   | LDHA      |
| 2.29499E-17 | down   | FAM107A   |
| 2.33442E-17 | up     | PKD1L2    |
| 2.36673E-17 | stable | C1RL      |
| 2.43368E-17 | stable | MED16     |
| 2.43368E-17 | down   | RNASE2    |
| 2.45476E-17 | stable | PNRC2     |
| 2.45546E-17 | stable | TICAM1    |
| 2.48361E-17 | stable | FXR1      |
| 2.60803E-17 | stable | LNX2      |
| 2.76453E-17 | stable | C4ORF41   |
| 2.799E-17   | down   | FKSG30    |
| 2.799E-17   | up     | PPP1R3C   |
| 2.8123E-17  | up     | TRAK2     |
| 2.98421E-17 | up     | MDFIC     |
| 2.98421E-17 | stable | THRA      |
| 3.11264E-17 | down   | CEL       |
| 3.27729E-17 | down   | OBFC2A    |
| 3.35145E-17 | stable | ZMYND19   |
| 3.38753E-17 | down   | MTHFR     |
| 3.4507E-17  | down   | KTELC1    |
| 3.72882E-17 | down   | LOC285556 |
| 3.76248E-17 | down   | ACTB      |
| 4.0666E-17  | down   | EMILIN1   |
| 4.1497E-17  | up     | HSPA2     |
| 4.15752E-17 | stable | AMZ2      |
| 4.19834E-17 | down   | PRKCQ     |
| 4.58229E-17 | stable | PTBP1     |
| 4.60538E-17 | stable | FAM102A   |
| 5.26191E-17 | stable | LGMN      |



DEG.infomation

|             |        |           |
|-------------|--------|-----------|
| 5.27196E-17 | stable | STXBP2    |
| 5.30793E-17 | down   | AIF1      |
| 5.35586E-17 | up     | FYCO1     |
| 5.45739E-17 | stable | ARF3      |
| 5.57385E-17 | down   | PDK4      |
| 5.58893E-17 | up     | TNNT1     |
| 5.84257E-17 | down   | ISG20     |
| 6.11017E-17 | down   | FCN1      |
| 6.4027E-17  | down   | KLF4      |
| 6.57759E-17 | stable | GRB2      |
| 6.60019E-17 | up     | THBS4     |
| 6.62294E-17 | down   | PHGDH     |
| 6.6337E-17  | down   | MTE       |
| 6.97395E-17 | stable | LILRA2    |
| 7.04465E-17 | stable | TEAD2     |
| 7.23775E-17 | stable | ARPC4     |
| 7.49147E-17 | down   | RAC2      |
| 7.58271E-17 | down   | IFI16     |
| 7.73725E-17 | stable | SLC31A1   |
| 7.94882E-17 | stable | SBNO2     |
| 8.0404E-17  | up     | IGSF5     |
| 8.0404E-17  | stable | UBN1      |
| 8.12402E-17 | stable | FAM46A    |
| 8.14565E-17 | up     | TMEM140   |
| 8.28815E-17 | stable | APOBEC3F  |
| 8.7547E-17  | stable | LMNA      |
| 8.93504E-17 | stable | C17ORF70  |
| 8.94906E-17 | up     | TMEM74    |
| 9.08923E-17 | stable | ZNF385A   |
| 9.15329E-17 | stable | ARRDC2    |
| 9.17635E-17 | up     | SOX4      |
| 9.19621E-17 | stable | LOC654264 |
| 9.22085E-17 | up     | GPNMB     |
| 9.30704E-17 | stable | POLR3H    |
| 9.36184E-17 | stable | C5AR1     |
| 9.36184E-17 | stable | EYA1      |
| 9.66991E-17 | stable | FCGR1B    |
| 9.72768E-17 | up     | GLRB      |
| 1.00005E-16 | stable | MKL1      |
| 1.00937E-16 | up     | C22ORF25  |
| 1.01339E-16 | up     | TPD52L1   |
| 1.01339E-16 | down   | ZNF189    |
| 1.02725E-16 | stable | SLMAP     |
| 1.05732E-16 | stable | GRRP1     |
| 1.10739E-16 | stable | MST150    |
| 1.14776E-16 | stable | ZMPSTE24  |
| 1.14776E-16 | stable | TNFRSF1B  |
| 1.20526E-16 | stable | CD276     |
| 1.20623E-16 | down   | CFD       |
| 1.24808E-16 | up     | OMD       |
| 1.25788E-16 | down   | PPP1R14B  |

## DEG.infomation

|             |        |           |
|-------------|--------|-----------|
| 1.2873E-16  | down   | GFOD1     |
| 1.32967E-16 | up     | CENPA     |
| 1.34399E-16 | stable | ASCC3L1   |
| 1.42453E-16 | up     | C14ORF135 |
| 1.46463E-16 | stable | PCK2      |
| 1.49137E-16 | up     | TSPAN32   |
| 1.49827E-16 | stable | SERPINI1  |
| 1.50763E-16 | up     | TM7SF2    |
| 1.52743E-16 | stable | TMEM14C   |
| 1.58768E-16 | down   | S100A11   |
| 1.60211E-16 | stable | SIRT5     |
| 1.6266E-16  | stable | KIAA1429  |
| 1.67413E-16 | up     | LOC401397 |
| 1.71081E-16 | down   | LOC399942 |
| 1.84873E-16 | stable | TMEM51    |
| 2.06363E-16 | down   | LYN       |
| 2.18352E-16 | up     | SGIP1     |
| 2.27952E-16 | stable | SPI1      |
| 2.29912E-16 | stable | RHOG      |
| 2.34165E-16 | stable | RCOR3     |
| 2.44468E-16 | stable | STEAP3    |
| 2.46708E-16 | stable | MGST3     |
| 2.47055E-16 | down   | APOLD1    |
| 2.56022E-16 | stable | PYGL      |
| 2.6005E-16  | stable | LOC643783 |
| 2.6879E-16  | stable | FZD1      |
| 2.71399E-16 | stable | MUC1      |
| 2.77223E-16 | stable | HSPA4L    |
| 2.8831E-16  | stable | CCNYL1    |
| 2.8831E-16  | stable | TMEM149   |
| 2.98581E-16 | stable | ZNF536    |
| 3.01709E-16 | down   | S100A12   |
| 3.05062E-16 | stable | ZNF616    |
| 3.07559E-16 | down   | ATP2A2    |
| 3.15014E-16 | up     | C10ORF110 |
| 3.22897E-16 | up     | KCNA5     |
| 3.28245E-16 | stable | DNAJC4    |
| 3.32421E-16 | stable | C12ORF47  |
| 3.40572E-16 | down   | RGS1      |
| 3.43443E-16 | stable | ARHGAP9   |
| 3.71373E-16 | down   | ID3       |
| 3.73484E-16 | down   | LOC648024 |
| 3.77401E-16 | up     | FRMD3     |
| 3.96089E-16 | up     | IER3      |
| 3.96089E-16 | down   | C13ORF15  |
| 4.0824E-16  | up     | EDC3      |
| 4.09767E-16 | up     | GARNL3    |
| 4.0999E-16  | stable | FAM129B   |
| 4.18223E-16 | down   | RNASE1    |
| 4.29231E-16 | down   | SMTNL2    |
| 4.4479E-16  | stable | SNX13     |

DEG.infomation

|             |        |           |
|-------------|--------|-----------|
| 4.4874E-16  | stable | FGD3      |
| 4.74087E-16 | stable | C1ORF105  |
| 4.77049E-16 | down   | PDGFRB    |
| 4.87748E-16 | stable | CD33      |
| 4.97034E-16 | down   | SLC7A5    |
| 5.36556E-16 | down   | FAM46B    |
| 5.49952E-16 | stable | PUF60     |
| 5.54737E-16 | down   | CLIC1     |
| 6.03709E-16 | stable | FPR3      |
| 6.10333E-16 | stable | B4GALT5   |
| 6.10333E-16 | stable | GCA       |
| 6.44042E-16 | down   | SOCS1     |
| 6.45162E-16 | stable | SLC31A2   |
| 6.45162E-16 | down   | SNF1LK    |
| 6.55664E-16 | stable | LOC642897 |
| 6.80617E-16 | stable | KLHL13    |
| 6.85245E-16 | stable | YARS      |
| 6.94665E-16 | up     | TMCO3     |
| 6.97906E-16 | stable | BRD8      |
| 7.2249E-16  | stable | CACNA1H   |
| 7.41299E-16 | stable | BDNF      |
| 7.90735E-16 | stable | COMMD1    |
| 8.0305E-16  | stable | FLJ35801  |
| 8.06613E-16 | up     | USP46     |
| 8.34185E-16 | stable | MLKL      |
| 8.51268E-16 | stable | PHF3      |
| 8.75149E-16 | up     | TMEM56    |
| 8.82769E-16 | stable | ATPBD4    |
| 8.86913E-16 | down   | LHFPL2    |
| 8.97437E-16 | stable | TRIM39    |
| 9.20658E-16 | stable | DRAM      |
| 9.20658E-16 | stable | MYADM     |
| 9.32595E-16 | stable | LILRA3    |
| 9.53798E-16 | up     | XPO4      |
| 9.77951E-16 | stable | TTYH3     |
| 9.81417E-16 | down   | CCL2      |
| 9.87934E-16 | stable | PTCD2     |
| 1.08125E-15 | stable | GPBAR1    |
| 1.12475E-15 | stable | RNF20     |
| 1.15038E-15 | stable | UNQ2541   |
| 1.15693E-15 | stable | ZNF30     |
| 1.16333E-15 | down   | ARPC5L    |
| 1.17281E-15 | down   | ADFP      |
| 1.18276E-15 | stable | HRK       |
| 1.19612E-15 | down   | SOX18     |
| 1.20734E-15 | up     | CXCR7     |
| 1.22192E-15 | stable | IL15RA    |
| 1.22996E-15 | down   | ITPR3     |
| 1.23549E-15 | down   | MAGOH     |
| 1.24801E-15 | stable | NEDD9     |
| 1.28708E-15 | stable | FLJ23584  |

## DEG.infomation

|             |        |           |
|-------------|--------|-----------|
| 1.30404E-15 | stable | KIAA1303  |
| 1.31602E-15 | stable | UPF3B     |
| 1.31602E-15 | stable | FLJ27354  |
| 1.34941E-15 | stable | ZNF16     |
| 1.3957E-15  | stable | PYCARD    |
| 1.41643E-15 | down   | GADD45G   |
| 1.41778E-15 | stable | LRP5      |
| 1.46646E-15 | stable | BBS4      |
| 1.50458E-15 | up     | ST8SIA5   |
| 1.50679E-15 | stable | CSK       |
| 1.57478E-15 | stable | ZNF502    |
| 1.57975E-15 | stable | EIF4ENIF1 |
| 1.57975E-15 | down   | PTHR1     |
| 1.5824E-15  | up     | TLL2      |
| 1.61434E-15 | up     | TAF15     |
| 1.61678E-15 | stable | C6ORF111  |
| 1.64605E-15 | stable | FURIN     |
| 1.65417E-15 | stable | POLR1E    |
| 1.66814E-15 | stable | SUSD1     |
| 1.7172E-15  | stable | NT5DC3    |
| 1.73057E-15 | down   | NBPF10    |
| 1.73059E-15 | stable | TUBG1     |
| 1.80597E-15 | stable | PAFAH1B3  |
| 1.80714E-15 | down   | ARHGDI4   |
| 1.91294E-15 | down   | LY96      |
| 1.91449E-15 | down   | LMCD1     |
| 1.95873E-15 | stable | SPTBN1    |
| 1.96719E-15 | up     | PROM1     |
| 2.10698E-15 | stable | FADD      |
| 2.14329E-15 | stable | ZNF671    |
| 2.20651E-15 | stable | LOC374395 |
| 2.22009E-15 | stable | C14ORF28  |
| 2.2264E-15  | stable | ETS2      |
| 2.24718E-15 | stable | LARP7     |
| 2.29731E-15 | down   | NINJ2     |
| 2.31257E-15 | stable | FGF1      |
| 2.31426E-15 | up     | C9ORF24   |
| 2.34416E-15 | down   | ADAMTS9   |
| 2.38978E-15 | down   | LOC647000 |
| 2.39006E-15 | stable | CCR1      |
| 2.39006E-15 | stable | MORN4     |
| 2.47088E-15 | stable | HMOX1     |
| 2.67643E-15 | stable | LRSAM1    |
| 2.88476E-15 | down   | CXCL2     |
| 2.96764E-15 | stable | GLIPR1    |
| 2.98406E-15 | up     | MFN2      |
| 3.16781E-15 | stable | CCND3     |
| 3.18804E-15 | up     | RBM20     |
| 3.21758E-15 | stable | NLRP3     |
| 3.2432E-15  | stable | MOAP1     |
| 3.70756E-15 | stable | SKP1A     |

## DEG.infomation

|             |        |          |
|-------------|--------|----------|
| 3.84109E-15 | stable | UBE2J1   |
| 4.12481E-15 | stable | COL4A5   |
| 4.13363E-15 | stable | BTK      |
| 4.24441E-15 | down   | SLC7A7   |
| 4.26164E-15 | stable | CX3CR1   |
| 4.30483E-15 | down   | WARS     |
| 4.47247E-15 | down   | SPOCK1   |
| 4.54146E-15 | stable | CAPN3    |
| 4.67014E-15 | stable | TSC1     |
| 4.75092E-15 | stable | SLC2A6   |
| 5.1432E-15  | stable | C3AR1    |
| 5.45607E-15 | stable | KIAA1468 |
| 5.89791E-15 | stable | PPM1G    |
| 6.04526E-15 | down   | PDGFRA   |
| 6.26253E-15 | stable | MYD88    |
| 6.29769E-15 | stable | PPCS     |
| 6.37772E-15 | down   | TIMP4    |
| 6.37986E-15 | stable | NOL6     |
| 6.38232E-15 | stable | PMM1     |
| 6.43029E-15 | stable | C5ORF37  |
| 6.43029E-15 | down   | TUBA1A   |
| 6.60762E-15 | stable | NMNAT3   |
| 6.60807E-15 | stable | MYCN     |
| 6.83746E-15 | stable | ZNF277   |
| 6.96469E-15 | up     | SNCA     |
| 6.97548E-15 | up     | SFRP4    |
| 7.25403E-15 | stable | LANCL1   |
| 7.46702E-15 | stable | PRDX6    |
| 7.58685E-15 | down   | AQP9     |
| 7.66471E-15 | stable | UNC45B   |
| 7.71872E-15 | stable | PLSCR3   |
| 8.09209E-15 | stable | NOL1     |
| 8.10253E-15 | down   | FCGBP    |
| 8.12147E-15 | stable | GAB1     |
| 8.1733E-15  | stable | ZFP90    |
| 8.25748E-15 | stable | LRCH4    |
| 8.25974E-15 | stable | P2RY11   |
| 8.25974E-15 | stable | IL4R     |
| 8.42462E-15 | down   | MAP2K1   |
| 8.51841E-15 | up     | CPT1B    |
| 8.67325E-15 | up     | GABRB1   |
| 8.90662E-15 | down   | TGFBR3   |
| 9.03449E-15 | down   | RDH5     |
| 9.12929E-15 | stable | PNPLA4   |
| 9.13763E-15 | up     | MLLT11   |
| 9.4783E-15  | stable | GRK4     |
| 9.70601E-15 | up     | HLF      |
| 9.93388E-15 | stable | TMEM42   |
| 1.00161E-14 | stable | ELL      |
| 1.00738E-14 | down   | EIF4A1   |
| 1.03897E-14 | stable | LFNG     |

## DEG.infomation

|             |        |          |
|-------------|--------|----------|
| 1.05859E-14 | stable | SLC44A3  |
| 1.0951E-14  | stable | MMP9     |
| 1.0951E-14  | up     | DCUN1D2  |
| 1.0951E-14  | stable | KIAA1370 |
| 1.12214E-14 | stable | PLA2G15  |
| 1.14283E-14 | down   | CCDC109B |
| 1.19826E-14 | stable | REXO1    |
| 1.21297E-14 | down   | NPTX2    |
| 1.23709E-14 | stable | PTPRM    |
| 1.25307E-14 | up     | CLIC6    |
| 1.25684E-14 | stable | SAMSN1   |
| 1.2865E-14  | stable | CTF1     |
| 1.30237E-14 | stable | ZNF564   |
| 1.30646E-14 | stable | MDP-1    |
| 1.3083E-14  | up     | FLJ21986 |
| 1.31025E-14 | down   | PVR      |
| 1.31179E-14 | down   | TAP1     |
| 1.3843E-14  | stable | GAK      |
| 1.38539E-14 | stable | C10ORF97 |
| 1.38539E-14 | stable | CD300C   |
| 1.40533E-14 | stable | ASB3     |
| 1.40903E-14 | stable | PSMB8    |
| 1.42877E-14 | down   | SLC16A3  |
| 1.42877E-14 | stable | YTHDC1   |
| 1.43549E-14 | stable | MTHFD2   |
| 1.43706E-14 | stable | VARS     |
| 1.46399E-14 | stable | UCRC     |
| 1.47217E-14 | up     | TMEM71   |
| 1.49447E-14 | stable | FAM89A   |
| 1.55733E-14 | stable | CDKL3    |
| 1.56668E-14 | down   | LRRC32   |
| 1.58549E-14 | stable | CCDC41   |
| 1.60993E-14 | stable | AKAP8    |
| 1.63512E-14 | stable | ZNHIT3   |
| 1.68378E-14 | down   | PDE4D    |
| 1.69484E-14 | stable | CD86     |
| 1.69546E-14 | down   | FASN     |
| 1.70627E-14 | stable | SYK      |
| 1.70627E-14 | stable | DCLK2    |
| 1.79253E-14 | up     | MYH7B    |
| 1.79912E-14 | stable | STEAP4   |
| 1.82137E-14 | stable | MS4A4A   |
| 1.91032E-14 | stable | SH2D3C   |
| 1.94839E-14 | stable | PDZD2    |
| 1.97604E-14 | stable | CRSP2    |
| 2.0292E-14  | stable | C11ORF74 |
| 2.04957E-14 | down   | SPPL2A   |
| 2.10394E-14 | stable | CHMP5    |
| 2.10416E-14 | stable | TPD52    |
| 2.12557E-14 | stable | ABL1     |
| 2.14836E-14 | stable | ANKRA2   |

## DEG.infomation

|             |        |           |
|-------------|--------|-----------|
| 2.17005E-14 | stable | RCN1      |
| 2.19281E-14 | stable | CDKN2D    |
| 2.24813E-14 | stable | DNAJC15   |
| 2.2978E-14  | stable | U2AF2     |
| 2.33825E-14 | up     | DPY19L2   |
| 2.34305E-14 | stable | CLDND2    |
| 2.36688E-14 | down   | NAMPT     |
| 2.42326E-14 | stable | ZNF664    |
| 2.44627E-14 | stable | RRAGB     |
| 2.46978E-14 | stable | CCDC121   |
| 2.52031E-14 | stable | SEC23B    |
| 2.52031E-14 | stable | TMUB1     |
| 2.52267E-14 | down   | PDE7A     |
| 2.52267E-14 | stable | FMO4      |
| 2.53443E-14 | stable | PVRL2     |
| 2.54627E-14 | stable | RNASE6    |
| 2.60168E-14 | stable | C14ORF147 |
| 2.72402E-14 | down   | CAP1      |
| 2.7845E-14  | stable | NXT1      |
| 2.84593E-14 | up     | OXCT1     |
| 2.90573E-14 | stable | FAM164A   |
| 3.0182E-14  | stable | H2AFY     |
| 3.18323E-14 | stable | SLC25A22  |
| 3.22268E-14 | stable | PAAF1     |
| 3.23337E-14 | down   | TMED9     |
| 3.27479E-14 | down   | IGFBP4    |
| 3.31461E-14 | up     | CTSF      |
| 3.40016E-14 | down   | EMP3      |
| 3.44654E-14 | stable | TRIM8     |
| 3.47278E-14 | stable | ATP1B2    |
| 3.52653E-14 | stable | RCC2      |
| 3.5512E-14  | down   | RAMP1     |
| 3.5512E-14  | up     | TYRP1     |
| 3.57221E-14 | up     | DUSP28    |
| 3.5938E-14  | stable | SMARCD2   |
| 3.65764E-14 | stable | RIN2      |
| 3.67593E-14 | stable | ZBTB4     |
| 3.82885E-14 | stable | H2AFZ     |
| 3.88969E-14 | stable | GPSM2     |
| 3.90843E-14 | up     | SLC2A12   |
| 3.94624E-14 | stable | C6ORF130  |
| 3.94767E-14 | stable | C7ORF44   |
| 4.00906E-14 | down   | LOC650832 |
| 4.08705E-14 | stable | TFDP2     |
| 4.09084E-14 | stable | MDK       |
| 4.12213E-14 | stable | LOC606724 |
| 4.15371E-14 | stable | GMPR2     |
| 4.15673E-14 | up     | NPR3      |
| 4.17389E-14 | up     | KIAA1394  |
| 4.24042E-14 | stable | APBB3     |
| 4.30496E-14 | stable | SKAP2     |

## DEG.infomation

|             |        |           |
|-------------|--------|-----------|
| 4.41409E-14 | stable | MAP2K5    |
| 4.45032E-14 | down   | HLA-DRB4  |
| 4.63189E-14 | stable | BAIAP2L1  |
| 4.63189E-14 | stable | FTL       |
| 4.63608E-14 | stable | WDR48     |
| 4.88537E-14 | stable | PTP4A2    |
| 4.88537E-14 | stable | GYS1      |
| 5.03288E-14 | stable | PPRC1     |
| 5.11198E-14 | stable | ESRRB     |
| 5.19743E-14 | up     | MUM1L1    |
| 5.22648E-14 | down   | MTP18     |
| 5.3716E-14  | stable | TMEM16A   |
| 5.37663E-14 | stable | PSTPIP2   |
| 5.71605E-14 | down   | LOC730525 |
| 5.84575E-14 | stable | HNRNPAB   |
| 6.11885E-14 | down   | S100A3    |
| 6.20232E-14 | down   | KLHL3     |
| 6.31706E-14 | stable | RAB3IL1   |
| 6.36663E-14 | stable | FAIM2     |
| 6.36663E-14 | stable | DPH2      |
| 6.41685E-14 | stable | POP5      |
| 6.55107E-14 | stable | PPWD1     |
| 6.75042E-14 | up     | SSPN      |
| 6.80669E-14 | stable | BOP1      |
| 7.23094E-14 | stable | ZDHHC18   |
| 7.34561E-14 | stable | RASSF2    |
| 7.47039E-14 | stable | VPS8      |
| 7.47039E-14 | stable | SLCO3A1   |
| 7.48737E-14 | stable | KIAA1949  |
| 7.52524E-14 | stable | TP53INP1  |
| 7.81695E-14 | up     | FNBP4     |
| 7.93545E-14 | stable | C17ORF58  |
| 8.11977E-14 | stable | POR       |
| 8.19846E-14 | stable | PRMT2     |
| 8.2407E-14  | stable | SLC38A3   |
| 8.31249E-14 | up     | ST8SIA2   |
| 8.58177E-14 | stable | ZEB1      |
| 8.70712E-14 | stable | C12ORF44  |
| 8.89306E-14 | stable | ZBTB25    |
| 9.03639E-14 | stable | ACYP2     |
| 9.21476E-14 | stable | LETMD1    |
| 9.61113E-14 | stable | STAB1     |
| 9.81141E-14 | stable | ZNF17     |
| 9.94613E-14 | stable | SLC36A4   |
| 9.99615E-14 | stable | MPHOSPH8  |
| 1.00507E-13 | up     | LOC723972 |
| 1.0084E-13  | stable | MYOM1     |
| 1.05507E-13 | stable | TESK1     |
| 1.09949E-13 | stable | AGTR1     |
| 1.09987E-13 | stable | CFL1      |
| 1.11223E-13 | up     | LOC647346 |



## DEG.infomation

|             |        |           |
|-------------|--------|-----------|
| 1.12852E-13 | stable | ZMAT1     |
| 1.14234E-13 | stable | RAB7B     |
| 1.17396E-13 | up     | KCNJ2     |
| 1.18655E-13 | stable | NSL1      |
| 1.21723E-13 | stable | ICAM2     |
| 1.22822E-13 | stable | PLAG1     |
| 1.2513E-13  | stable | CAV3      |
| 1.26337E-13 | stable | EIF2B4    |
| 1.2885E-13  | stable | XPC       |
| 1.30911E-13 | stable | DPM1      |
| 1.31819E-13 | stable | DYRK4     |
| 1.32858E-13 | stable | CRLF3     |
| 1.35451E-13 | stable | GALNT17   |
| 1.40562E-13 | stable | OCIAD2    |
| 1.41603E-13 | stable | MFSD1     |
| 1.42105E-13 | stable | OGFR      |
| 1.4708E-13  | stable | LOC441019 |
| 1.47184E-13 | stable | LEFTY2    |
| 1.49873E-13 | down   | TRIB1     |
| 1.49873E-13 | up     | PLA2G4C   |
| 1.57836E-13 | stable | BAX       |
| 1.66368E-13 | stable | GGT5      |
| 1.67123E-13 | stable | FLAD1     |
| 1.67775E-13 | stable | SLC40A1   |
| 1.6833E-13  | stable | BLM       |
| 1.6905E-13  | stable | GATAD2A   |
| 1.74612E-13 | stable | FRMD4A    |
| 1.79791E-13 | stable | CLEC10A   |
| 1.80865E-13 | stable | LOC643888 |
| 1.82771E-13 | stable | EFR3A     |
| 1.82824E-13 | stable | RWDD3     |
| 1.8343E-13  | up     | SCRN1     |
| 1.84427E-13 | stable | ST3GAL1   |
| 1.84696E-13 | stable | KIAA0427  |
| 1.84971E-13 | stable | ZCCHC5    |
| 1.87646E-13 | stable | IK        |
| 2.0014E-13  | stable | RNF145    |
| 2.09893E-13 | stable | SOCS3     |
| 2.10203E-13 | stable | FLJ20273  |
| 2.10203E-13 | stable | PRR16     |
| 2.1099E-13  | stable | LLGL1     |
| 2.13258E-13 | down   | ITGB4BP   |
| 2.30654E-13 | down   | LDLR      |
| 2.36634E-13 | stable | TCTEX1D2  |
| 2.48737E-13 | stable | SDCCAG1   |
| 2.51099E-13 | stable | SHISA2    |
| 2.53299E-13 | stable | ZBED4     |
| 2.53299E-13 | stable | KIAA1217  |
| 2.67259E-13 | up     | FMOD      |
| 2.78102E-13 | stable | M160      |
| 2.84281E-13 | stable | STAMBPL1  |

DEG.infomation

|             |        |            |
|-------------|--------|------------|
| 2.8807E-13  | stable | SCO2       |
| 2.96866E-13 | stable | ZFP82      |
| 3.03115E-13 | stable | C14ORF106  |
| 3.0634E-13  | stable | ZNF404     |
| 3.06903E-13 | stable | TAF1       |
| 3.16327E-13 | stable | MTRF1L     |
| 3.1801E-13  | stable | RCBTB2     |
| 3.18287E-13 | up     | MATN2      |
| 3.29273E-13 | stable | SLC25A27   |
| 3.45811E-13 | stable | ZRANB2     |
| 3.45996E-13 | down   | SAT1       |
| 3.51518E-13 | stable | DOPEY1     |
| 3.59179E-13 | stable | MAP6       |
| 3.61205E-13 | stable | ZNF615     |
| 3.62287E-13 | stable | ISCU       |
| 3.66131E-13 | stable | GMPPB      |
| 3.66131E-13 | stable | SLC24A6    |
| 3.73984E-13 | stable | LMTK2      |
| 3.76216E-13 | stable | CLEC4G     |
| 3.76216E-13 | down   | SERTAD1    |
| 3.76795E-13 | down   | TUBB4Q     |
| 3.94541E-13 | stable | TMEM126B   |
| 3.98385E-13 | stable | C9ORF125   |
| 4.04291E-13 | stable | CCDC25     |
| 4.07024E-13 | stable | MPDU1      |
| 4.07212E-13 | up     | LRRC39     |
| 4.07212E-13 | stable | TBC1D16    |
| 4.15285E-13 | stable | SH3GL1     |
| 4.15622E-13 | stable | ISLR       |
| 4.26418E-13 | up     | SLITRK4    |
| 4.29306E-13 | stable | E2F4       |
| 4.54034E-13 | stable | SCUBE2     |
| 4.63954E-13 | stable | RP9        |
| 4.78016E-13 | stable | LOC730063  |
| 4.89426E-13 | stable | RAB8A      |
| 4.92246E-13 | up     | PRRX1      |
| 4.92246E-13 | stable | BRMS1      |
| 4.92246E-13 | stable | FST        |
| 4.96088E-13 | down   | SPP1       |
| 5.0536E-13  | stable | CDKN2AIP   |
| 5.05542E-13 | stable | SEPSECS    |
| 5.21413E-13 | stable | TMSB10     |
| 5.32734E-13 | up     | GLDN       |
| 5.37745E-13 | stable | ATPAF1     |
| 5.3964E-13  | stable | CATSPER2P1 |
| 5.40447E-13 | stable | TRIM41     |
| 5.51423E-13 | stable | PSPH       |
| 5.67326E-13 | up     | APOA1      |
| 5.84058E-13 | stable | BBS2       |
| 5.86328E-13 | stable | PITPNM1    |
| 5.88397E-13 | down   | LOC402221  |

## DEG.infomation

|             |        |           |
|-------------|--------|-----------|
| 6.06496E-13 | stable | ZNF816A   |
| 6.41521E-13 | stable | C17ORF62  |
| 6.43307E-13 | up     | COL7A1    |
| 6.43307E-13 | stable | SLC11A2   |
| 6.4389E-13  | stable | SLC3A2    |
| 6.489E-13   | stable | FAM65A    |
| 6.50569E-13 | up     | C1ORF24   |
| 6.72508E-13 | down   | CYP4B1    |
| 6.89907E-13 | down   | IHPK3     |
| 7.03932E-13 | stable | FAM98C    |
| 7.05533E-13 | stable | HCFC1     |
| 7.09975E-13 | stable | WDR1      |
| 7.33361E-13 | stable | ZNF433    |
| 7.46205E-13 | stable | PFN1      |
| 7.54557E-13 | stable | NDP       |
| 7.94264E-13 | stable | TMEM2     |
| 8.13199E-13 | stable | LGTN      |
| 8.14736E-13 | stable | TNFRSF14  |
| 8.1854E-13  | up     | MYOZ3     |
| 8.32635E-13 | stable | BIRC3     |
| 8.52713E-13 | up     | ALDH5A1   |
| 8.70308E-13 | stable | LAT2      |
| 8.70881E-13 | stable | BCAT1     |
| 8.93429E-13 | stable | MAP2K3    |
| 9.21418E-13 | stable | KDEL2     |
| 9.39333E-13 | stable | ALDH4A1   |
| 9.4201E-13  | stable | TGIF1     |
| 9.46368E-13 | stable | IFNGR1    |
| 9.63542E-13 | stable | ADD3      |
| 9.65032E-13 | up     | GADD45A   |
| 9.8384E-13  | up     | SGCG      |
| 9.97808E-13 | up     | GJA1      |
| 1.02993E-12 | stable | RAB5A     |
| 1.03233E-12 | stable | DPH5      |
| 1.03484E-12 | stable | PEX1      |
| 1.06107E-12 | stable | SERTAD3   |
| 1.07109E-12 | down   | WWC1      |
| 1.08609E-12 | stable | THAP6     |
| 1.10065E-12 | stable | B3GNT8    |
| 1.13591E-12 | stable | ARHGEF19  |
| 1.14358E-12 | down   | STS-1     |
| 1.15475E-12 | stable | ZNF248    |
| 1.15821E-12 | stable | ARMC4     |
| 1.15833E-12 | down   | TMEM43    |
| 1.18224E-12 | stable | ADAL      |
| 1.19099E-12 | up     | MYOZ2     |
| 1.22946E-12 | down   | MT1G      |
| 1.25776E-12 | up     | IL17D     |
| 1.25776E-12 | down   | RGS2      |
| 1.26511E-12 | stable | LOC492311 |
| 1.2694E-12  | stable | AKR7A3    |

## DEG.infomation

|             |        |           |
|-------------|--------|-----------|
| 1.36621E-12 | stable | LRFN3     |
| 1.38548E-12 | up     | OLFML2A   |
| 1.38642E-12 | stable | CBR4      |
| 1.40604E-12 | up     | C20ORF26  |
| 1.44067E-12 | down   | ID1       |
| 1.45743E-12 | stable | DNAJC19   |
| 1.47696E-12 | stable | COL4A3BP  |
| 1.50612E-12 | stable | KBTBD3    |
| 1.50771E-12 | stable | MFNG      |
| 1.53602E-12 | stable | ZKSCAN4   |
| 1.55651E-12 | down   | TNFAIP8L3 |
| 1.55748E-12 | stable | TCIRG1    |
| 1.5741E-12  | stable | LONRF2    |
| 1.58334E-12 | stable | FBXO8     |
| 1.59068E-12 | down   | ITGA5     |
| 1.6126E-12  | stable | ST3GAL2   |
| 1.61955E-12 | stable | LIX1L     |
| 1.63378E-12 | stable | MN1       |
| 1.63773E-12 | stable | HYI       |
| 1.70907E-12 | stable | PTRH2     |
| 1.70907E-12 | stable | RNF103    |
| 1.71548E-12 | down   | ANKRD13A  |
| 1.80202E-12 | stable | SPATA7    |
| 1.82495E-12 | stable | CTNNA3    |
| 1.83254E-12 | stable | KANK1     |
| 1.88567E-12 | stable | TNPO1     |
| 1.9228E-12  | stable | LOC401431 |
| 1.9228E-12  | stable | U1SNRNPBP |
| 1.92599E-12 | stable | C10ORF11  |
| 2.03297E-12 | stable | CDC37     |
| 2.06187E-12 | stable | ST13      |
| 2.06759E-12 | stable | SLC25A43  |
| 2.10149E-12 | down   | ALPL      |
| 2.10339E-12 | stable | JMJD1C    |
| 2.18179E-12 | stable | BAZ2B     |
| 2.20251E-12 | stable | SNAPC5    |
| 2.23491E-12 | stable | THAP9     |
| 2.2484E-12  | stable | PEMT      |
| 2.31257E-12 | stable | ANPEP     |
| 2.32002E-12 | stable | NCDN      |
| 2.33917E-12 | stable | PMS2L5    |
| 2.35621E-12 | up     | TPM3      |
| 2.38108E-12 | stable | WDSUB1    |
| 2.53617E-12 | stable | SCO1      |
| 2.57068E-12 | stable | DAND5     |
| 2.57383E-12 | up     | DBC1      |
| 2.59352E-12 | stable | WBP1      |
| 2.59886E-12 | stable | RGS11     |
| 2.69788E-12 | stable | PARP2     |
| 2.76063E-12 | stable | BHLHB9    |
| 2.77211E-12 | stable | ECOP      |

DEG.infomation

|             |        |          |
|-------------|--------|----------|
| 2.80045E-12 | stable | AZIN1    |
| 2.80765E-12 | stable | LRWD1    |
| 2.8502E-12  | stable | RABGGTB  |
| 2.86745E-12 | down   | XBP1     |
| 2.93904E-12 | stable | TRIM5    |
| 2.98005E-12 | stable | MRFAP1L1 |
| 2.98914E-12 | stable | AP1B1    |
| 2.99301E-12 | stable | CCPG1    |
| 3.00183E-12 | stable | PGA5     |
| 3.03219E-12 | stable | EDEM2    |
| 3.10973E-12 | down   | PTDSS1   |
| 3.12861E-12 | stable | PQBP1    |
| 3.14977E-12 | stable | ZDHHC5   |
| 3.20143E-12 | stable | CLK4     |
| 3.20143E-12 | stable | RANBP10  |
| 3.22438E-12 | stable | ARHGEF6  |
| 3.22438E-12 | stable | SMARCD3  |
| 3.23434E-12 | stable | FAM131A  |
| 3.23434E-12 | stable | SETMAR   |
| 3.27204E-12 | down   | PICALM   |
| 3.27432E-12 | stable | G6PD     |
| 3.31471E-12 | stable | C9ORF114 |
| 3.33696E-12 | stable | THSD4    |
| 3.37394E-12 | stable | RNF214   |
| 3.4809E-12  | stable | DAGLB    |
| 3.53112E-12 | stable | TMEM150  |
| 3.53124E-12 | up     | SOX15    |
| 3.72468E-12 | stable | RUNX1T1  |
| 3.7572E-12  | stable | CBR3     |
| 3.85085E-12 | stable | KIAA0040 |
| 3.85398E-12 | stable | FLJ10986 |
| 3.91233E-12 | stable | SIGLEC10 |
| 3.91466E-12 | stable | TTC14    |
| 3.98708E-12 | up     | IFIT2    |
| 4.02764E-12 | stable | IL17RB   |
| 4.03239E-12 | stable | RGS6     |
| 4.0773E-12  | stable | ZNF407   |
| 4.12243E-12 | stable | ZSCAN5A  |
| 4.13865E-12 | stable | TBC1D8   |
| 4.20044E-12 | stable | RIPK2    |
| 4.22281E-12 | stable | CRIP1    |
| 4.2572E-12  | stable | KCNE1    |
| 4.38948E-12 | stable | LOC63920 |
| 4.41036E-12 | stable | C9ORF119 |
| 4.44389E-12 | stable | IL7R     |
| 4.44794E-12 | stable | FAM152B  |
| 4.46509E-12 | stable | C19ORF22 |
| 4.52309E-12 | stable | PIK3R1   |
| 4.54879E-12 | stable | NAAA     |
| 4.58016E-12 | stable | STOM     |
| 4.58432E-12 | stable | GTF2F2   |

## DEG.infomation

|             |        |           |
|-------------|--------|-----------|
| 4.67579E-12 | stable | ELA2      |
| 4.7832E-12  | stable | ZNF323    |
| 4.78553E-12 | stable | AGBL5     |
| 5.06972E-12 | stable | UPF2      |
| 5.13441E-12 | stable | C3ORF23   |
| 5.16603E-12 | stable | WDFY2     |
| 5.1949E-12  | stable | KIAA0831  |
| 5.22876E-12 | up     | C20ORF177 |
| 5.25235E-12 | stable | TUFT1     |
| 5.3054E-12  | up     | SH3GL2    |
| 5.37871E-12 | stable | SLC25A18  |
| 5.39725E-12 | down   | HSPA6     |
| 5.40485E-12 | stable | SERPINB8  |
| 5.40529E-12 | down   | ATP1B3    |
| 5.53992E-12 | stable | PCBD1     |
| 5.5486E-12  | stable | PGBD4     |
| 5.73247E-12 | stable | VSTM2L    |
| 5.92533E-12 | stable | TUBB2A    |
| 6.06136E-12 | stable | KIAA1383  |
| 6.06633E-12 | stable | PLP2      |
| 6.09964E-12 | stable | C10ORF26  |
| 6.36105E-12 | down   | SERPINB1  |
| 6.51419E-12 | stable | SNX1      |
| 6.51419E-12 | stable | SFRS9     |
| 6.55293E-12 | stable | IAH1      |
| 6.55845E-12 | stable | WDR4      |
| 6.64448E-12 | stable | TEX12     |
| 6.77261E-12 | down   | FOS       |
| 6.82233E-12 | stable | PILRA     |
| 6.844E-12   | stable | CNKSR3    |
| 6.84949E-12 | stable | ATM       |
| 6.8644E-12  | stable | SPATA2L   |
| 6.89136E-12 | stable | GAS2      |
| 6.98156E-12 | stable | ZNF598    |
| 7.44638E-12 | stable | AK3L1     |
| 7.44793E-12 | stable | NUDT4     |
| 7.44988E-12 | stable | ZFP3      |
| 7.44988E-12 | up     | FAM129A   |
| 7.47077E-12 | up     | TMEM30B   |
| 7.50134E-12 | stable | AKR7A2    |
| 7.57355E-12 | stable | ENAM      |
| 7.59326E-12 | down   | ALDH1A3   |
| 7.60436E-12 | stable | FUNDC1    |
| 7.66315E-12 | stable | ZMYND11   |
| 7.66996E-12 | stable | DHX40     |
| 7.67995E-12 | stable | VGLL4     |
| 7.92693E-12 | up     | RYR2      |
| 7.97982E-12 | stable | HSPB7     |
| 8.70282E-12 | stable | AMPH      |
| 8.90947E-12 | stable | LOC541471 |
| 8.98986E-12 | stable | ITGA3     |

## DEG.infomation

|             |        |           |
|-------------|--------|-----------|
| 9.13429E-12 | stable | C7ORF53   |
| 9.24982E-12 | stable | PAPD4     |
| 9.34935E-12 | stable | LOC88523  |
| 9.56461E-12 | down   | NP        |
| 9.88056E-12 | stable | KIAA1712  |
| 1.00375E-11 | stable | GJA4      |
| 1.00619E-11 | stable | C1ORF175  |
| 1.01739E-11 | up     | FNDC1     |
| 1.02099E-11 | stable | SRPRB     |
| 1.03119E-11 | stable | CNTNAP1   |
| 1.07489E-11 | stable | DOK5      |
| 1.07733E-11 | stable | TXLNA     |
| 1.08695E-11 | stable | TOB2      |
| 1.08828E-11 | stable | PKD2      |
| 1.10377E-11 | stable | LPCAT1    |
| 1.10815E-11 | stable | KLHDC6    |
| 1.10815E-11 | stable | NDEL1     |
| 1.11667E-11 | stable | C11ORF1   |
| 1.14974E-11 | stable | FNIP1     |
| 1.16022E-11 | stable | CAMK2B    |
| 1.19416E-11 | down   | MSX1      |
| 1.19883E-11 | stable | LONRF1    |
| 1.21856E-11 | stable | C4ORF18   |
| 1.22013E-11 | stable | ZZZ3      |
| 1.22065E-11 | stable | LOC390975 |
| 1.22487E-11 | stable | ZNF706    |
| 1.27702E-11 | stable | LCN12     |
| 1.27702E-11 | stable | RARB      |
| 1.28007E-11 | up     | CTSK      |
| 1.28667E-11 | stable | PRKCB1    |
| 1.30689E-11 | down   | KLF2      |
| 1.35109E-11 | stable | ERCC5     |
| 1.36748E-11 | stable | COX15     |
| 1.41348E-11 | stable | MKRN2     |
| 1.42561E-11 | stable | BYSL      |
| 1.46107E-11 | down   | COL6A3    |
| 1.46217E-11 | down   | STXBP6    |
| 1.46481E-11 | up     | GPR22     |
| 1.49545E-11 | stable | GGH       |
| 1.49545E-11 | stable | ZNF544    |
| 1.54731E-11 | stable | ATP2C1    |
| 1.56734E-11 | stable | CHST13    |
| 1.58746E-11 | stable | WDR46     |
| 1.6058E-11  | down   | BST2      |
| 1.65621E-11 | stable | TCF21     |
| 1.6778E-11  | stable | NDFIP1    |
| 1.67797E-11 | stable | RBPJ      |
| 1.73704E-11 | stable | ARHGEF12  |
| 1.75469E-11 | up     | LOC644760 |
| 1.78222E-11 | stable | GPR137C   |
| 1.80398E-11 | stable | PFDN1     |

## DEG.infomation

|             |        |           |
|-------------|--------|-----------|
| 1.81851E-11 | stable | SCAP      |
| 1.81851E-11 | stable | C1ORF63   |
| 1.82378E-11 | up     | CASQ1     |
| 1.90145E-11 | stable | LIN7B     |
| 1.92853E-11 | stable | SLC1A7    |
| 1.93043E-11 | up     | RNF165    |
| 1.93043E-11 | stable | CYFIP1    |
| 1.95054E-11 | stable | RBM24     |
| 1.95188E-11 | stable | MGEA5     |
| 1.96126E-11 | stable | OSCAR     |
| 1.9797E-11  | stable | UBXN2A    |
| 1.99308E-11 | stable | TM9SF1    |
| 2.04889E-11 | stable | FAM59A    |
| 2.05023E-11 | stable | PGBD3     |
| 2.13295E-11 | stable | ELF4      |
| 2.16937E-11 | stable | ZNF540    |
| 2.18555E-11 | stable | MPPE1     |
| 2.18555E-11 | stable | CPNE8     |
| 2.18555E-11 | stable | GTPBP6    |
| 2.18612E-11 | stable | KIAA0922  |
| 2.18612E-11 | stable | TIMM44    |
| 2.22889E-11 | stable | PROK2     |
| 2.25451E-11 | stable | CDK2      |
| 2.26912E-11 | up     | CA3       |
| 2.31396E-11 | stable | CENPB     |
| 2.4068E-11  | stable | TMEM49    |
| 2.41769E-11 | stable | TMEM167B  |
| 2.4244E-11  | stable | FBXL22    |
| 2.50589E-11 | stable | ANKRD46   |
| 2.53027E-11 | stable | MSRB3     |
| 2.61855E-11 | stable | BAZ1A     |
| 2.7867E-11  | stable | GLT25D1   |
| 2.78953E-11 | stable | C12ORF39  |
| 2.81505E-11 | down   | IFITM1    |
| 2.85929E-11 | stable | PDK3      |
| 2.87627E-11 | stable | MYO9B     |
| 2.88878E-11 | stable | NUP62     |
| 2.95438E-11 | stable | KCNAB1    |
| 2.98593E-11 | stable | B4GALT3   |
| 2.99911E-11 | stable | TMEM144   |
| 3.10311E-11 | stable | SLC25A44  |
| 3.25976E-11 | stable | ZBTB47    |
| 3.3215E-11  | stable | GNL1      |
| 3.32339E-11 | stable | SEC15L2   |
| 3.35085E-11 | stable | TNFRSF6B  |
| 3.35504E-11 | stable | PFKFB3    |
| 3.3847E-11  | stable | LOC440589 |
| 3.42324E-11 | down   | ANXA2     |
| 3.42469E-11 | up     | CMBL      |
| 3.44713E-11 | stable | LOC651380 |
| 3.45449E-11 | stable | LOC391692 |



## DEG.infomation

|             |        |           |
|-------------|--------|-----------|
| 3.52141E-11 | stable | CX3CL1    |
| 3.52715E-11 | stable | PSIP1     |
| 3.58812E-11 | down   | IL8       |
| 3.63181E-11 | stable | VPS13A    |
| 3.682E-11   | stable | WDR70     |
| 3.682E-11   | down   | CDKN1A    |
| 3.82102E-11 | stable | GRIA3     |
| 3.82102E-11 | stable | HDAC5     |
| 3.82102E-11 | stable | HSF1      |
| 3.86564E-11 | stable | FBXO3     |
| 3.92164E-11 | stable | ELF1      |
| 3.92753E-11 | up     | LOC196549 |
| 4.00135E-11 | stable | QSOX1     |
| 4.00715E-11 | up     | FLJ10781  |
| 4.10442E-11 | stable | PLEKHH2   |
| 4.11852E-11 | stable | SIPA1     |
| 4.17995E-11 | stable | C1QA      |
| 4.18526E-11 | stable | IRAK1     |
| 4.19582E-11 | stable | CTSS      |
| 4.19582E-11 | stable | C14ORF45  |
| 4.21685E-11 | stable | OSTF1     |
| 4.23559E-11 | stable | DUT       |
| 4.23559E-11 | stable | LOC648500 |
| 4.33561E-11 | stable | MID1IP1   |
| 4.49014E-11 | stable | KAL1      |
| 4.54477E-11 | stable | ZFP106    |
| 4.56227E-11 | stable | TFE3      |
| 4.63368E-11 | stable | FAM20C    |
| 4.68584E-11 | stable | NFKB2     |
| 5.06629E-11 | stable | LEPREL2   |
| 5.14858E-11 | stable | TRAK1     |
| 5.20388E-11 | stable | CCM2      |
| 5.21898E-11 | down   | CRISPLD2  |
| 5.22224E-11 | stable | CYP2U1    |
| 5.3598E-11  | stable | ANTXR2    |
| 5.40758E-11 | stable | ACADM     |
| 5.43769E-11 | up     | PROX1     |
| 5.43807E-11 | down   | SCD       |
| 5.46757E-11 | up     | MFAP4     |
| 5.50742E-11 | stable | KIAA1737  |
| 5.57092E-11 | stable | NCOA7     |
| 5.63917E-11 | stable | MAEL      |
| 5.65404E-11 | stable | PHACTR4   |
| 5.73307E-11 | stable | OSBPL2    |
| 5.76902E-11 | down   | IL1RL1    |
| 5.80464E-11 | stable | SH3D19    |
| 5.86281E-11 | stable | ZC3H12B   |
| 6.05509E-11 | stable | ACAD8     |
| 6.07385E-11 | stable | MTMR10    |
| 6.1108E-11  | stable | DYNC1LI2  |
| 6.13598E-11 | stable | POLA2     |

## DEG.infomation

|             |        |               |
|-------------|--------|---------------|
| 6.1957E-11  | down   | ATF3          |
| 6.26376E-11 | stable | ATF7IP2       |
| 6.35301E-11 | stable | SLC35A2       |
| 6.35301E-11 | stable | PSMD3         |
| 6.37477E-11 | stable | FAM13A1       |
| 6.55023E-11 | up     | SLC30A2       |
| 6.56474E-11 | stable | CDKN1B        |
| 6.57091E-11 | stable | PREPL         |
| 6.72174E-11 | stable | ZNF541        |
| 6.87034E-11 | stable | C20ORF24      |
| 6.90199E-11 | stable | KHDRBS3       |
| 6.90199E-11 | stable | GOLSYN        |
| 7.01366E-11 | up     | DKFZP564O0823 |
| 7.08347E-11 | stable | ZNF763        |
| 7.09557E-11 | stable | NR2C2AP       |
| 7.19418E-11 | stable | RABGAP1       |
| 7.25519E-11 | stable | LIAS          |
| 7.27761E-11 | stable | LOC285908     |
| 7.56016E-11 | stable | DARS2         |
| 7.59692E-11 | down   | NME1          |
| 7.62206E-11 | stable | ACTG1         |
| 7.64374E-11 | stable | TNIK          |
| 7.67654E-11 | down   | CTSG          |
| 7.68542E-11 | stable | PACSIN2       |
| 7.73974E-11 | down   | C17ORF91      |
| 7.80157E-11 | up     | SOCS2         |
| 7.88903E-11 | stable | ABHD11        |
| 7.9275E-11  | stable | ZNF302        |
| 8.00869E-11 | stable | SLC9A3R1      |
| 8.00869E-11 | stable | COPZ2         |
| 8.08411E-11 | stable | OTUD4         |
| 8.21133E-11 | stable | UBB           |
| 8.48803E-11 | stable | IKBKG         |
| 8.50128E-11 | stable | IRF8          |
| 8.54196E-11 | stable | ORC5L         |
| 8.61842E-11 | stable | EPAS1         |
| 8.72713E-11 | stable | ZCCHC7        |
| 8.76911E-11 | stable | GPATCH4       |
| 8.96151E-11 | stable | ALDH6A1       |
| 9.01683E-11 | stable | NOLA1         |
| 9.03282E-11 | stable | ORC2L         |
| 9.10719E-11 | stable | PROCR         |
| 9.15459E-11 | stable | MARK3         |
| 9.21537E-11 | stable | ORAOV1        |
| 9.37897E-11 | stable | RAI2          |
| 9.3845E-11  | stable | NT5C2         |
| 9.56297E-11 | stable | SLC25A39      |
| 9.6909E-11  | stable | TARS2         |
| 1.00485E-10 | up     | ACOX2         |
| 1.0249E-10  | stable | RBMX2         |
| 1.02845E-10 | stable | ETV6          |

## DEG.infomation

|             |        |           |
|-------------|--------|-----------|
| 1.0343E-10  | up     | MAP4      |
| 1.08765E-10 | stable | THNSL1    |
| 1.09337E-10 | stable | NFYC      |
| 1.09597E-10 | stable | RGS17     |
| 1.10518E-10 | stable | RNF144B   |
| 1.13764E-10 | stable | HTR2B     |
| 1.13835E-10 | stable | ZMYM4     |
| 1.13904E-10 | stable | CASP4     |
| 1.16669E-10 | stable | CMTM8     |
| 1.16831E-10 | stable | DIXDC1    |
| 1.17993E-10 | stable | CCDC130   |
| 1.18323E-10 | stable | ADHFE1    |
| 1.18489E-10 | stable | TCEAL7    |
| 1.19062E-10 | stable | SURF4     |
| 1.19062E-10 | stable | CCDC66    |
| 1.19799E-10 | stable | NSDHL     |
| 1.20725E-10 | stable | LOC730024 |
| 1.22179E-10 | stable | CST3      |
| 1.22209E-10 | stable | NRSN2     |
| 1.25421E-10 | stable | KLF12     |
| 1.27451E-10 | stable | ZNF518A   |
| 1.29056E-10 | stable | ATAD3A    |
| 1.31604E-10 | stable | GFM2      |
| 1.32168E-10 | stable | RNF220    |
| 1.32925E-10 | stable | OPN3      |
| 1.361E-10   | stable | GRAP      |
| 1.36869E-10 | stable | LEAP2     |
| 1.43028E-10 | stable | PPP3CC    |
| 1.43301E-10 | stable | CCDC91    |
| 1.45129E-10 | stable | EPHA3     |
| 1.45645E-10 | stable | CAPZB     |
| 1.53816E-10 | stable | SLC6A9    |
| 1.54438E-10 | stable | LOC203547 |
| 1.55634E-10 | stable | DPAGT1    |
| 1.59551E-10 | up     | VAT1L     |
| 1.59575E-10 | stable | TINF2     |
| 1.61175E-10 | stable | FBXO31    |
| 1.62772E-10 | stable | SOX17     |
| 1.654E-10   | stable | SHISA5    |
| 1.66322E-10 | down   | LITAF     |
| 1.66508E-10 | stable | ARHGEF3   |
| 1.66891E-10 | stable | CNNM4     |
| 1.68715E-10 | stable | IGBP1     |
| 1.69189E-10 | stable | PSCD4     |
| 1.75185E-10 | stable | ARAF      |
| 1.75189E-10 | stable | C19ORF54  |
| 1.76106E-10 | stable | SLC6A1    |
| 1.77271E-10 | stable | C9ORF61   |
| 1.78743E-10 | stable | RGS5      |
| 1.81809E-10 | stable | MTHFD2L   |
| 1.8473E-10  | up     | HBEGF     |

## DEG.infomation

|             |        |           |
|-------------|--------|-----------|
| 1.8765E-10  | stable | SLU7      |
| 1.88005E-10 | stable | C17ORF85  |
| 1.89006E-10 | stable | MAFG      |
| 1.9095E-10  | stable | EVC       |
| 1.91397E-10 | stable | AQP10     |
| 1.93595E-10 | stable | NMB       |
| 1.96281E-10 | stable | SMARCE1   |
| 1.96281E-10 | up     | FLJ35258  |
| 1.97448E-10 | stable | TOR1AIP1  |
| 1.99274E-10 | stable | EBI3      |
| 1.99327E-10 | stable | C8ORF40   |
| 2.0103E-10  | stable | CCDC112   |
| 2.02902E-10 | stable | C6ORF91   |
| 2.06527E-10 | stable | TSPAN12   |
| 2.07562E-10 | stable | GLOD4     |
| 2.09429E-10 | stable | SCAMP2    |
| 2.13743E-10 | stable | NIP7      |
| 2.20975E-10 | stable | ACADL     |
| 2.27259E-10 | stable | ZNF135    |
| 2.29215E-10 | down   | IL6       |
| 2.31475E-10 | stable | CORO1B    |
| 2.31936E-10 | stable | PIAS2     |
| 2.37268E-10 | stable | ITPKC     |
| 2.37558E-10 | stable | TCEAL4    |
| 2.38778E-10 | stable | CMIP      |
| 2.38778E-10 | stable | ATPAF2    |
| 2.39911E-10 | stable | LOC121952 |
| 2.42997E-10 | stable | EIF3B     |
| 2.46388E-10 | stable | ARV1      |
| 2.47324E-10 | stable | NHLRC3    |
| 2.4846E-10  | stable | DNAJC13   |
| 2.49564E-10 | stable | CLPTM1    |
| 2.51047E-10 | stable | NAT10     |
| 2.51047E-10 | stable | UNQ1940   |
| 2.56439E-10 | stable | ZSCAN18   |
| 2.59387E-10 | stable | CD300A    |
| 2.59549E-10 | stable | FAM92A1   |
| 2.60497E-10 | stable | VGLL2     |
| 2.60779E-10 | stable | C1ORF165  |
| 2.63305E-10 | stable | SEPT9     |
| 2.63305E-10 | down   | TIMP1     |
| 2.63387E-10 | stable | LOC400963 |
| 2.72397E-10 | stable | INTS9     |
| 2.73843E-10 | stable | ARMCX2    |
| 2.7776E-10  | stable | LCMT1     |
| 2.81007E-10 | stable | ATP6V1F   |
| 2.81552E-10 | stable | PRKCH     |
| 2.83599E-10 | stable | HARS2     |
| 2.83599E-10 | down   | TSC22D1   |
| 2.91156E-10 | stable | C1ORF25   |
| 2.92912E-10 | stable | THUMPD3   |

## DEG.infomation

|             |        |           |
|-------------|--------|-----------|
| 3.03645E-10 | stable | TIMELESS  |
| 3.0609E-10  | stable | RNF126    |
| 3.0609E-10  | stable | YWHAQ     |
| 3.14255E-10 | stable | GLT25D2   |
| 3.19323E-10 | stable | CCL11     |
| 3.21997E-10 | stable | TRUB1     |
| 3.27925E-10 | stable | TP53INP2  |
| 3.28563E-10 | stable | PFDN4     |
| 3.32149E-10 | stable | TNFAIP3   |
| 3.33311E-10 | stable | IL18RAP   |
| 3.33311E-10 | stable | ZNF630    |
| 3.39276E-10 | stable | MT1F      |
| 3.39306E-10 | stable | C10ORF35  |
| 3.43446E-10 | stable | SLC38A10  |
| 3.43591E-10 | stable | C10ORF125 |
| 3.47316E-10 | stable | KCNIP2    |
| 3.57527E-10 | stable | EIF4A2    |
| 3.58804E-10 | stable | CDC42EP1  |
| 3.59115E-10 | stable | TTF1      |
| 3.59158E-10 | stable | TUBB3     |
| 3.63952E-10 | stable | CAMK1D    |
| 3.69706E-10 | stable | FCGR1A    |
| 3.71509E-10 | stable | MAPK7     |
| 3.74947E-10 | stable | RAB23     |
| 3.7642E-10  | stable | UAP1      |
| 3.80512E-10 | stable | ENAH      |
| 3.83176E-10 | stable | NEK1      |
| 3.87245E-10 | stable | LOC652458 |
| 3.87715E-10 | stable | PRIC285   |
| 3.93587E-10 | stable | PDIA4     |
| 3.95675E-10 | stable | CSDC2     |
| 3.99957E-10 | stable | RAB5C     |
| 4.02426E-10 | stable | FBXL2     |
| 4.03237E-10 | down   | ANXA5     |
| 4.06427E-10 | down   | LOC649143 |
| 4.11764E-10 | stable | TNMD      |
| 4.11865E-10 | stable | SPNS1     |
| 4.39052E-10 | stable | CDH19     |
| 4.43434E-10 | stable | UBE2W     |
| 4.45028E-10 | stable | TSSC4     |
| 4.45723E-10 | stable | FAM120B   |
| 4.51453E-10 | stable | MYO1G     |
| 4.52205E-10 | up     | APP       |
| 4.56764E-10 | stable | DNTTIP1   |
| 4.5716E-10  | stable | PPP1R9A   |
| 4.57725E-10 | stable | LOC199800 |
| 4.60625E-10 | stable | SPTAN1    |
| 4.60625E-10 | stable | FBXL6     |
| 4.64367E-10 | stable | AKR1C4    |
| 4.69825E-10 | stable | ARHGAP1   |
| 4.73503E-10 | stable | FYB       |

DEG.infomation

|             |        |           |
|-------------|--------|-----------|
| 4.75152E-10 | stable | CCDC86    |
| 4.77644E-10 | stable | MTMR15    |
| 4.79196E-10 | stable | CD40      |
| 4.83311E-10 | stable | HERC5     |
| 4.89011E-10 | stable | IL1R2     |
| 4.89347E-10 | stable | CLCC1     |
| 5.03173E-10 | stable | IFT88     |
| 5.03294E-10 | stable | CPEB1     |
| 5.03294E-10 | stable | LOC441408 |
| 5.04179E-10 | stable | ACOT1     |
| 5.07769E-10 | stable | BRP44L    |
| 5.25225E-10 | stable | C11ORF60  |
| 5.3772E-10  | stable | RECQL     |
| 5.40624E-10 | up     | C21ORF7   |
| 5.42484E-10 | stable | C2ORF34   |
| 5.47295E-10 | stable | MGC40489  |
| 5.62976E-10 | down   | LIPG      |
| 5.62976E-10 | stable | ARD1A     |
| 5.6827E-10  | stable | VIL2      |
| 5.76462E-10 | stable | BIRC6     |
| 5.7952E-10  | stable | PSCD1     |
| 5.82903E-10 | stable | TTLL7     |
| 5.85758E-10 | stable | PCMTD2    |
| 5.94432E-10 | stable | DCTN6     |
| 6.01698E-10 | stable | ZNF653    |
| 6.03536E-10 | up     | HIST1H2AC |
| 6.03536E-10 | stable | KIAA1598  |
| 6.03829E-10 | stable | TNFRSF10B |
| 6.07642E-10 | stable | NFE2L3    |
| 6.07642E-10 | stable | ZNF235    |
| 6.18768E-10 | stable | ARRDC3    |
| 6.21617E-10 | stable | CLASP1    |
| 6.25949E-10 | stable | C19ORF24  |
| 6.25949E-10 | stable | CD37      |
| 6.32949E-10 | stable | MAEA      |
| 6.36788E-10 | stable | FLJ20444  |
| 6.47001E-10 | stable | C9ORF6    |
| 6.54755E-10 | stable | C10ORF76  |
| 6.59373E-10 | stable | RCOR2     |
| 6.6454E-10  | stable | SPIN3     |
| 6.68409E-10 | stable | KIAA0194  |
| 6.73848E-10 | stable | SSU72     |
| 6.73848E-10 | stable | LRRRC25   |
| 6.74032E-10 | stable | RFTN1     |
| 6.74032E-10 | stable | C7ORF36   |
| 6.76144E-10 | stable | VPS37B    |
| 6.76599E-10 | stable | ZNF177    |
| 6.82297E-10 | stable | LOC285550 |
| 6.82297E-10 | stable | TMEM100   |
| 7.01632E-10 | stable | KCNA4     |
| 7.17752E-10 | stable | LOC649679 |

DEG.infomation

|             |        |           |
|-------------|--------|-----------|
| 7.19791E-10 | stable | BID       |
| 7.25205E-10 | stable | GNB3      |
| 7.25386E-10 | stable | GPR116    |
| 7.28886E-10 | stable | DDR1      |
| 7.32299E-10 | down   | IQCG      |
| 7.36116E-10 | stable | PCDHB17   |
| 7.39565E-10 | stable | TSPAN13   |
| 7.41697E-10 | stable | TRMT11    |
| 7.49024E-10 | down   | JUNB      |
| 7.55113E-10 | stable | LOC91561  |
| 7.55113E-10 | stable | TXNDC1    |
| 7.55113E-10 | stable | LOC730273 |
| 7.60804E-10 | stable | ALS2      |
| 7.62412E-10 | stable | THYN1     |
| 7.672E-10   | stable | PMM2      |
| 7.79829E-10 | stable | C13ORF33  |
| 7.90535E-10 | stable | LOC728014 |
| 7.90723E-10 | stable | IGSF1     |
| 7.96428E-10 | stable | C6ORF153  |
| 8.00083E-10 | stable | C1QTNF7   |
| 8.11867E-10 | down   | MT1E      |
| 8.22224E-10 | stable | ARHGAP12  |
| 8.3327E-10  | stable | BCL9      |
| 8.33933E-10 | stable | AXL       |
| 8.35039E-10 | up     | MXRA5     |
| 8.39112E-10 | stable | ZNF233    |
| 8.42807E-10 | stable | GBGT1     |
| 8.47295E-10 | stable | PAPSS2    |
| 8.54511E-10 | stable | THAP10    |
| 8.6407E-10  | stable | CPEB3     |
| 8.69382E-10 | stable | RAB24     |
| 8.75426E-10 | stable | DPP3      |
| 8.77757E-10 | stable | SLC22A5   |
| 8.86472E-10 | stable | LY86      |
| 8.95999E-10 | down   | CORIN     |
| 8.98761E-10 | stable | C14ORF159 |
| 9.15063E-10 | stable | ADAM15    |
| 9.15063E-10 | stable | MYL1      |
| 9.21526E-10 | stable | DAK       |
| 9.23132E-10 | stable | RSC1A1    |
| 9.23132E-10 | stable | PCCB      |
| 9.3632E-10  | stable | C3ORF54   |
| 9.36722E-10 | stable | ATP13A1   |
| 9.49659E-10 | stable | MBIP      |
| 9.6029E-10  | stable | DHX32     |
| 9.6029E-10  | up     | IRF6      |
| 9.70026E-10 | stable | GABRE     |
| 9.82243E-10 | stable | PTGER2    |
| 9.92481E-10 | stable | HAPLN1    |
| 9.96461E-10 | stable | SPG11     |
| 1.00133E-09 | stable | TRIM33    |

## DEG.infomation

|             |        |              |
|-------------|--------|--------------|
| 1.01071E-09 | stable | TPM4         |
| 1.01288E-09 | stable | SEMA4D       |
| 1.0165E-09  | stable | EPB49        |
| 1.02513E-09 | stable | PPP1R1A      |
| 1.0267E-09  | down   | HAMP         |
| 1.04099E-09 | stable | LOC201175    |
| 1.04331E-09 | stable | SLC5A6       |
| 1.04718E-09 | down   | LYZ          |
| 1.04848E-09 | stable | SMARCA4      |
| 1.07376E-09 | stable | SENP5        |
| 1.09654E-09 | stable | F2RL3        |
| 1.11129E-09 | stable | KIF5B        |
| 1.11901E-09 | stable | PSTPIP1      |
| 1.15035E-09 | stable | RGL1         |
| 1.15557E-09 | stable | TSPYL1       |
| 1.15679E-09 | stable | CCL13        |
| 1.17377E-09 | up     | LOC100008589 |
| 1.18974E-09 | stable | KLHL36       |
| 1.19115E-09 | stable | GNB1         |
| 1.19887E-09 | stable | EDNRB        |
| 1.19887E-09 | stable | NLGN1        |
| 1.19915E-09 | stable | SETD8        |
| 1.22814E-09 | stable | SBK1         |
| 1.23781E-09 | stable | ALG13        |
| 1.25399E-09 | stable | GPX1         |
| 1.25668E-09 | stable | PKD1         |
| 1.25793E-09 | stable | EIF2C2       |
| 1.27473E-09 | stable | LOC441461    |
| 1.28373E-09 | stable | TSKU         |
| 1.29011E-09 | stable | NAPB         |
| 1.29222E-09 | stable | ARHGEF17     |
| 1.30528E-09 | stable | RNF146       |
| 1.30603E-09 | stable | C2ORF33      |
| 1.30603E-09 | stable | C21ORF69     |
| 1.30603E-09 | stable | NOTCH3       |
| 1.3061E-09  | stable | SERTAD4      |
| 1.30675E-09 | stable | ING4         |
| 1.33102E-09 | stable | FERMT2       |
| 1.33625E-09 | stable | MPZL1        |
| 1.3692E-09  | stable | CRYZL1       |
| 1.36936E-09 | stable | SLC26A4      |
| 1.37892E-09 | stable | ZNF23        |
| 1.40515E-09 | stable | STK19        |
| 1.40796E-09 | stable | GFPT1        |
| 1.43449E-09 | stable | ZNF76        |
| 1.45169E-09 | stable | MAN2B1       |
| 1.45368E-09 | stable | FHL3         |
| 1.46068E-09 | stable | ZNF503       |
| 1.46413E-09 | stable | LAMA2        |
| 1.48486E-09 | stable | ERMAP        |
| 1.48815E-09 | stable | KIAA0460     |



## DEG.infomation

|             |        |           |
|-------------|--------|-----------|
| 1.5166E-09  | stable | TMEM79    |
| 1.54948E-09 | stable | TSC22D3   |
| 1.55637E-09 | stable | C14ORF139 |
| 1.59571E-09 | up     | GCOM1     |
| 1.60026E-09 | up     | KLHL24    |
| 1.60214E-09 | stable | LPAR4     |
| 1.61963E-09 | stable | PDCD6IP   |
| 1.6207E-09  | stable | KIDINS220 |
| 1.6283E-09  | stable | SDF4      |
| 1.63073E-09 | stable | C15ORF24  |
| 1.63702E-09 | stable | SSR1      |
| 1.67407E-09 | stable | C20ORF127 |
| 1.67719E-09 | stable | CAP2      |
| 1.67719E-09 | stable | C2ORF28   |
| 1.69806E-09 | stable | GPR3      |
| 1.7009E-09  | stable | TTC8      |
| 1.70386E-09 | stable | FAM133A   |
| 1.70797E-09 | stable | GABARAPL2 |
| 1.71796E-09 | stable | RCCD1     |
| 1.72521E-09 | stable | C16ORF30  |
| 1.73529E-09 | stable | TTC37     |
| 1.73707E-09 | stable | PITPNC1   |
| 1.75027E-09 | stable | BACH2     |
| 1.76922E-09 | stable | FBXO21    |
| 1.78431E-09 | stable | LEF1      |
| 1.78722E-09 | stable | ATXN3     |
| 1.80999E-09 | stable | HEXA      |
| 1.81991E-09 | stable | NIN       |
| 1.82904E-09 | stable | PDE1C     |
| 1.86516E-09 | stable | RAB8B     |
| 1.86564E-09 | stable | PLSCR1    |
| 1.89783E-09 | stable | FBXO18    |
| 1.91033E-09 | stable | GLCE      |
| 1.95655E-09 | stable | RPN2      |
| 1.95691E-09 | stable | ZNF230    |
| 1.98193E-09 | stable | RTKN      |
| 2.00418E-09 | stable | MRPS14    |
| 2.0045E-09  | stable | EPHB4     |
| 2.03213E-09 | stable | JAM3      |
| 2.07913E-09 | stable | SLC25A25  |
| 2.08192E-09 | stable | RPL29     |
| 2.10428E-09 | stable | TRIM45    |
| 2.11114E-09 | down   | PTPN1     |
| 2.13113E-09 | stable | MMP23A    |
| 2.13184E-09 | stable | LIME1     |
| 2.18297E-09 | down   | SDF2L1    |
| 2.18297E-09 | stable | SPRY1     |
| 2.22219E-09 | stable | TOB1      |
| 2.24879E-09 | stable | KIAA2010  |
| 2.27788E-09 | down   | SLC2A3    |
| 2.28135E-09 | stable | ATP7B     |

DEG.infomation

|             |        |           |
|-------------|--------|-----------|
| 2.28135E-09 | stable | PDE4DIP   |
| 2.29299E-09 | stable | TRPC1     |
| 2.30078E-09 | stable | MYO19     |
| 2.32112E-09 | stable | PCMTD1    |
| 2.33875E-09 | stable | PER3      |
| 2.34707E-09 | stable | C1ORF212  |
| 2.34707E-09 | stable | HESX1     |
| 2.37409E-09 | stable | C1ORF183  |
| 2.38873E-09 | stable | GSTA4     |
| 2.40203E-09 | stable | TBC1D4    |
| 2.4035E-09  | stable | ACLY      |
| 2.40487E-09 | stable | GALM      |
| 2.43541E-09 | stable | RECK      |
| 2.44301E-09 | stable | RELB      |
| 2.44665E-09 | stable | APBA3     |
| 2.47112E-09 | down   | IRX3      |
| 2.47112E-09 | stable | ADAM11    |
| 2.47218E-09 | stable | RASSF7    |
| 2.48932E-09 | stable | OLFM1     |
| 2.48932E-09 | stable | POLR3GL   |
| 2.49284E-09 | stable | NOD2      |
| 2.49391E-09 | stable | KRIT1     |
| 2.54576E-09 | stable | PUS7      |
| 2.55357E-09 | stable | ADC       |
| 2.56648E-09 | stable | LEPROTL1  |
| 2.57898E-09 | stable | JOSD1     |
| 2.66004E-09 | stable | C10ORF33  |
| 2.69841E-09 | stable | UBL7      |
| 2.69881E-09 | stable | RWDD2A    |
| 2.85409E-09 | stable | ACADSB    |
| 2.86906E-09 | stable | FAM58A    |
| 2.8806E-09  | stable | SND1      |
| 2.8806E-09  | stable | HERC6     |
| 3.0206E-09  | stable | LOC728037 |
| 3.07675E-09 | stable | ATP1B1    |
| 3.08777E-09 | up     | LOC652097 |
| 3.17598E-09 | stable | LOC644739 |
| 3.18604E-09 | stable | LOH3CR2A  |
| 3.30163E-09 | stable | KCTD18    |
| 3.32739E-09 | stable | LOC653186 |
| 3.3396E-09  | stable | GRAMD1A   |
| 3.33962E-09 | stable | MYO5A     |
| 3.34984E-09 | stable | DPY19L4   |
| 3.38738E-09 | stable | ABCF2     |
| 3.4184E-09  | stable | LMO7      |
| 3.49586E-09 | stable | TCF25     |
| 3.54849E-09 | stable | DNAJB12   |
| 3.54887E-09 | stable | DOCK11    |
| 3.56311E-09 | down   | C3ORF52   |
| 3.61183E-09 | stable | AGAP3     |
| 3.62838E-09 | stable | FDFT1     |

## DEG.infomation

|             |        |          |
|-------------|--------|----------|
| 3.62838E-09 | stable | POLR2G   |
| 3.6407E-09  | stable | C4ORF38  |
| 3.66484E-09 | stable | P2RY2    |
| 3.68378E-09 | stable | WEE1     |
| 3.6993E-09  | up     | BEX1     |
| 3.7037E-09  | stable | MRPL35   |
| 3.71294E-09 | stable | UGCG     |
| 3.73017E-09 | stable | ZNF654   |
| 3.75695E-09 | stable | MPP6     |
| 3.7871E-09  | stable | PTN      |
| 3.7871E-09  | stable | HACL1    |
| 3.79021E-09 | stable | C4ORF29  |
| 3.79021E-09 | stable | GPATCH1  |
| 3.79733E-09 | up     | PXDNL    |
| 3.83803E-09 | stable | ACTN2    |
| 3.91867E-09 | stable | ZNF366   |
| 3.95957E-09 | stable | FAM38A   |
| 3.99976E-09 | stable | BIVM     |
| 4.00882E-09 | stable | EXOC2    |
| 4.06209E-09 | stable | SEMA6B   |
| 4.06766E-09 | stable | MURC     |
| 4.11034E-09 | stable | ANK2     |
| 4.11219E-09 | stable | DET1     |
| 4.12389E-09 | stable | CBX3     |
| 4.14123E-09 | stable | IKIP     |
| 4.1445E-09  | stable | DOCK8    |
| 4.15664E-09 | stable | NUP37    |
| 4.17864E-09 | stable | ZNF626   |
| 4.17887E-09 | stable | GRK5     |
| 4.22045E-09 | stable | AP2S1    |
| 4.28284E-09 | stable | LARP5    |
| 4.30157E-09 | stable | EFHD2    |
| 4.32182E-09 | stable | RASD2    |
| 4.34925E-09 | stable | LYRM2    |
| 4.3544E-09  | stable | RFX5     |
| 4.36912E-09 | stable | CHI3L2   |
| 4.37046E-09 | stable | DDX39    |
| 4.44939E-09 | stable | SLC35A1  |
| 4.58044E-09 | stable | OSGEPL1  |
| 4.59016E-09 | stable | ARHGEF9  |
| 4.59078E-09 | stable | VPS16    |
| 4.6432E-09  | stable | ANKRD6   |
| 4.6432E-09  | stable | DOCK1    |
| 4.6432E-09  | stable | SEC61B   |
| 4.6432E-09  | stable | AFF3     |
| 4.70006E-09 | stable | MRTO4    |
| 4.70031E-09 | up     | RABGAP1L |
| 4.71199E-09 | stable | EIF4EBP3 |
| 4.74977E-09 | stable | ABCG2    |
| 4.79921E-09 | stable | QPCT     |
| 4.79921E-09 | stable | GEMIN8   |

## DEG.infomation

|             |        |           |
|-------------|--------|-----------|
| 4.79921E-09 | stable | POLR1C    |
| 4.80212E-09 | stable | AFMID     |
| 4.80255E-09 | stable | NCAM2     |
| 4.9374E-09  | stable | FANCL     |
| 4.99864E-09 | stable | RARA      |
| 5.01428E-09 | stable | USP54     |
| 5.01428E-09 | up     | C1ORF188  |
| 5.01428E-09 | stable | RAB6IP1   |
| 5.0832E-09  | stable | GLT8D2    |
| 5.0903E-09  | stable | PFAS      |
| 5.10401E-09 | stable | NDUFA8    |
| 5.10953E-09 | stable | C19ORF12  |
| 5.13097E-09 | stable | CAT       |
| 5.21631E-09 | stable | TXNDC5    |
| 5.27782E-09 | stable | AMY2A     |
| 5.31233E-09 | stable | UBAP1     |
| 5.31736E-09 | stable | TAP2      |
| 5.35258E-09 | stable | HCCS      |
| 5.39636E-09 | stable | VDAC3     |
| 5.40871E-09 | stable | STARD7    |
| 5.41241E-09 | stable | IL11RA    |
| 5.44621E-09 | stable | UNG       |
| 5.45623E-09 | stable | AMHR2     |
| 5.53699E-09 | stable | UBTD1     |
| 5.55749E-09 | stable | C10ORF32  |
| 5.59435E-09 | stable | ESM1      |
| 5.67301E-09 | stable | PRR6      |
| 5.67345E-09 | stable | SH3TC1    |
| 5.70279E-09 | stable | LOC648147 |
| 5.82972E-09 | stable | SPAG16    |
| 5.83217E-09 | stable | SNTA1     |
| 5.83833E-09 | stable | NUDT6     |
| 5.84087E-09 | stable | ORAI3     |
| 5.86785E-09 | stable | ZNF337    |
| 6.00012E-09 | stable | MGC27348  |
| 6.04359E-09 | stable | TMLHE     |
| 6.09945E-09 | stable | PELI1     |
| 6.12289E-09 | stable | RAPH1     |
| 6.15623E-09 | stable | CXCL16    |
| 6.22021E-09 | stable | IRF7      |
| 6.37424E-09 | stable | TMEM165   |
| 6.48306E-09 | stable | MLH3      |
| 6.50254E-09 | down   | AZGP1     |
| 6.54343E-09 | stable | PHYH      |
| 6.56637E-09 | stable | SPCS2     |
| 6.59435E-09 | stable | KPNA2     |
| 6.7084E-09  | stable | PLEKHB2   |
| 6.7084E-09  | stable | FOLR2     |
| 6.71318E-09 | stable | SFRS2IP   |
| 6.75423E-09 | stable | AOX1      |
| 6.76157E-09 | stable | ZNF594    |

## DEG.infomation

|             |        |           |
|-------------|--------|-----------|
| 6.78756E-09 | stable | CAND2     |
| 6.79355E-09 | stable | BMP6      |
| 6.82813E-09 | stable | DIDO1     |
| 6.82813E-09 | stable | SREBF1    |
| 6.90541E-09 | stable | FABP5     |
| 7.03592E-09 | stable | RRP9      |
| 7.05411E-09 | stable | CHCHD6    |
| 7.05461E-09 | up     | ENO2      |
| 7.12459E-09 | stable | VPS13D    |
| 7.13262E-09 | stable | PRDX1     |
| 7.13262E-09 | stable | MMP25     |
| 7.15783E-09 | stable | CCRK      |
| 7.22895E-09 | stable | AUP1      |
| 7.24278E-09 | stable | CCRN4L    |
| 7.24278E-09 | stable | SPC24     |
| 7.29409E-09 | up     | SULF1     |
| 7.32227E-09 | stable | SDCCAG3   |
| 7.36051E-09 | stable | B3GNT2    |
| 7.38556E-09 | stable | DNAJB6    |
| 7.42277E-09 | stable | FCGRT     |
| 7.43705E-09 | stable | APITD1    |
| 7.43705E-09 | stable | UBE2Q2    |
| 7.46947E-09 | stable | PPP1R3A   |
| 7.50685E-09 | stable | HOMER1    |
| 7.52455E-09 | stable | ACYP1     |
| 7.5246E-09  | stable | MGST2     |
| 7.5365E-09  | stable | IL6R      |
| 7.64559E-09 | stable | MRPS36    |
| 7.73398E-09 | stable | PMPCB     |
| 7.80374E-09 | stable | SRI       |
| 7.86904E-09 | stable | FLJ46082  |
| 7.89393E-09 | stable | SLAMF8    |
| 8.01196E-09 | stable | ATXN10    |
| 8.11438E-09 | stable | CYP39A1   |
| 8.24397E-09 | stable | APLP2     |
| 8.31772E-09 | stable | CXORF57   |
| 8.32396E-09 | stable | RPP40     |
| 8.40214E-09 | stable | GIT2      |
| 8.40214E-09 | stable | MGC87042  |
| 8.40214E-09 | down   | CD44      |
| 8.54345E-09 | stable | DUSP16    |
| 8.57737E-09 | stable | KCTD5     |
| 8.68997E-09 | stable | LOC344595 |
| 8.88547E-09 | down   | CYR61     |
| 8.93198E-09 | stable | LOC201229 |
| 9.00324E-09 | stable | BASP1     |
| 9.02733E-09 | stable | SLC25A19  |
| 9.03854E-09 | stable | NPC1      |
| 9.09221E-09 | stable | FAR2      |
| 9.16888E-09 | stable | PKP2      |
| 9.24827E-09 | stable | YWHAH     |

## DEG.infomation

|             |        |           |
|-------------|--------|-----------|
| 9.34237E-09 | stable | UBE2Q1    |
| 9.3757E-09  | up     | GEM       |
| 9.43385E-09 | stable | FOXS1     |
| 9.45684E-09 | stable | USP13     |
| 9.47338E-09 | stable | CCDC147   |
| 9.52132E-09 | stable | IGFBP5    |
| 9.66295E-09 | stable | DTX2      |
| 9.66558E-09 | stable | TAF9L     |
| 9.7082E-09  | stable | DMTF1     |
| 9.78841E-09 | stable | GALT      |
| 9.87848E-09 | stable | HIP1R     |
| 9.97858E-09 | up     | LDB3      |
| 1.00754E-08 | stable | SEMA5B    |
| 1.01388E-08 | stable | C9ORF21   |
| 1.02391E-08 | stable | KIAA1143  |
| 1.03942E-08 | stable | TXNDC14   |
| 1.04279E-08 | stable | RASSF4    |
| 1.04354E-08 | stable | TNFRSF21  |
| 1.04438E-08 | stable | CLEC16A   |
| 1.04793E-08 | stable | CASZ1     |
| 1.05553E-08 | stable | CCDC6     |
| 1.05643E-08 | stable | TNRC6A    |
| 1.05712E-08 | stable | SEMA6D    |
| 1.05743E-08 | stable | LOC283953 |
| 1.06005E-08 | stable | IMP4      |
| 1.07493E-08 | stable | ZNF167    |
| 1.08932E-08 | stable | C17ORF60  |
| 1.08983E-08 | stable | RRM1      |
| 1.09216E-08 | stable | CLTA      |
| 1.12811E-08 | stable | ZFP2      |
| 1.13285E-08 | stable | ZNF740    |
| 1.1384E-08  | down   | C10RF117  |
| 1.14725E-08 | stable | LARP6     |
| 1.15078E-08 | stable | MYH9      |
| 1.15905E-08 | stable | PRKAB2    |
| 1.17231E-08 | stable | ATHL1     |
| 1.17875E-08 | stable | TOR3A     |
| 1.18283E-08 | stable | GMFG      |
| 1.19989E-08 | stable | FICD      |
| 1.20411E-08 | stable | CADPS     |
| 1.21351E-08 | stable | APRT      |
| 1.23686E-08 | stable | HIF1AN    |
| 1.24178E-08 | down   | ISG20L1   |
| 1.25015E-08 | stable | ESAM      |
| 1.25097E-08 | stable | GPAM      |
| 1.26935E-08 | stable | SUB1      |
| 1.29482E-08 | stable | TOM1      |
| 1.30691E-08 | stable | SNX12     |
| 1.31627E-08 | stable | NUP205    |
| 1.32143E-08 | stable | DOK6      |
| 1.33146E-08 | stable | CKLF      |

## DEG.infomation

|             |        |           |
|-------------|--------|-----------|
| 1.33359E-08 | stable | SLC25A11  |
| 1.34049E-08 | stable | PSME4     |
| 1.34661E-08 | stable | SRBD1     |
| 1.34871E-08 | stable | OSBPL3    |
| 1.35707E-08 | stable | RHOB      |
| 1.36641E-08 | stable | S100A16   |
| 1.37349E-08 | stable | OGFRL1    |
| 1.37789E-08 | stable | CMAH      |
| 1.3841E-08  | stable | SLC35F2   |
| 1.39651E-08 | stable | ZNF839    |
| 1.40181E-08 | down   | HEY2      |
| 1.40379E-08 | stable | KBTBD7    |
| 1.41476E-08 | stable | MKL2      |
| 1.42216E-08 | stable | TNFRSF10A |
| 1.42252E-08 | stable | RFWD2     |
| 1.42367E-08 | stable | LIMCH1    |
| 1.45675E-08 | down   | MUSTN1    |
| 1.50416E-08 | stable | AACS      |
| 1.51706E-08 | stable | TTC3      |
| 1.51779E-08 | stable | PLEKHB1   |
| 1.51779E-08 | stable | PTPN21    |
| 1.54512E-08 | stable | KCNS3     |
| 1.55963E-08 | stable | NFE2L1    |
| 1.56045E-08 | stable | B4GALT1   |
| 1.56079E-08 | stable | ADRM1     |
| 1.56164E-08 | stable | TEX261    |
| 1.5738E-08  | stable | ZNF641    |
| 1.58353E-08 | stable | TCTA      |
| 1.61094E-08 | stable | C9ORF100S |
| 1.62892E-08 | stable | OPTN      |
| 1.65173E-08 | stable | PFKFB4    |
| 1.65782E-08 | stable | KIAA1128  |
| 1.67618E-08 | stable | ANP32C    |
| 1.69661E-08 | stable | PLCD3     |
| 1.70342E-08 | stable | HMGCL     |
| 1.70372E-08 | stable | DDO       |
| 1.71029E-08 | stable | MGC35361  |
| 1.72231E-08 | stable | SPIRE1    |
| 1.73771E-08 | stable | DDX59     |
| 1.74376E-08 | stable | EFCAB7    |
| 1.75742E-08 | stable | VAMP1     |
| 1.76543E-08 | stable | KCTD12    |
| 1.77045E-08 | stable | CCDC92    |
| 1.78316E-08 | stable | FHOD3     |
| 1.79888E-08 | stable | TXNDC13   |
| 1.80307E-08 | stable | GAS1      |
| 1.80986E-08 | stable | PAICS     |
| 1.81511E-08 | stable | THOC5     |
| 1.81511E-08 | stable | GTF2H5    |
| 1.83403E-08 | stable | HSPA5     |
| 1.84269E-08 | stable | CPT2      |

## DEG.infomation

|             |        |           |
|-------------|--------|-----------|
| 1.84617E-08 | stable | BMP4      |
| 1.85061E-08 | stable | GLIPR2    |
| 1.86195E-08 | stable | PPIL1     |
| 1.86761E-08 | stable | WTIP      |
| 1.86761E-08 | stable | FTSJ1     |
| 1.87258E-08 | stable | MNDA      |
| 1.88415E-08 | stable | CRELD2    |
| 1.89396E-08 | stable | TUB       |
| 1.89797E-08 | stable | FOSL1     |
| 1.93708E-08 | stable | TFPI      |
| 1.957E-08   | stable | ZNF83     |
| 1.96883E-08 | stable | UBA3      |
| 1.96987E-08 | stable | C10ORF78  |
| 2.01018E-08 | stable | PSMB6     |
| 2.02774E-08 | stable | FBXO4     |
| 2.03754E-08 | stable | ZNF471    |
| 2.03839E-08 | stable | MOBKL2A   |
| 2.04339E-08 | stable | PFN4      |
| 2.06571E-08 | stable | DBNL      |
| 2.06571E-08 | stable | IL1R1     |
| 2.06902E-08 | stable | RASL11A   |
| 2.07882E-08 | stable | AGRN      |
| 2.0882E-08  | stable | FAM173B   |
| 2.0882E-08  | stable | MARCH5    |
| 2.08896E-08 | stable | GNB1L     |
| 2.09626E-08 | up     | DPYSL4    |
| 2.1003E-08  | down   | TUBB6     |
| 2.11355E-08 | stable | FAM96B    |
| 2.11355E-08 | stable | HTRA3     |
| 2.11562E-08 | stable | CADM1     |
| 2.14416E-08 | stable | MYH10     |
| 2.14653E-08 | stable | IRX5      |
| 2.16497E-08 | stable | MOBKL2C   |
| 2.16835E-08 | stable | NDST1     |
| 2.2006E-08  | stable | CA14      |
| 2.24492E-08 | stable | CCDC45    |
| 2.25139E-08 | stable | TPSAB1    |
| 2.25935E-08 | stable | ATG4D     |
| 2.25935E-08 | stable | MYL6B     |
| 2.27722E-08 | stable | SEMA5A    |
| 2.28282E-08 | stable | BOLA2     |
| 2.28353E-08 | stable | IPO11     |
| 2.32268E-08 | stable | MGC4172   |
| 2.33866E-08 | stable | EMR2      |
| 2.34361E-08 | stable | LOC149448 |
| 2.36698E-08 | stable | STARD8    |
| 2.36821E-08 | stable | FRMPD4    |
| 2.39267E-08 | stable | TAF6L     |
| 2.43447E-08 | stable | ADAMTSL5  |
| 2.47105E-08 | stable | CSF1R     |
| 2.48029E-08 | stable | ZDHH8     |



DEG.infomation

|             |        |              |
|-------------|--------|--------------|
| 2.48029E-08 | stable | P2RY5        |
| 2.52876E-08 | stable | TRMT1        |
| 2.54727E-08 | stable | DCAKD        |
| 2.55557E-08 | stable | OBSL1        |
| 2.57483E-08 | stable | PTPN12       |
| 2.57483E-08 | stable | STX12        |
| 2.58246E-08 | stable | POLR3F       |
| 2.58246E-08 | stable | DEGS1        |
| 2.62588E-08 | stable | PAOX         |
| 2.62588E-08 | stable | LOC91461     |
| 2.67407E-08 | stable | NNT          |
| 2.68268E-08 | stable | SNORA64      |
| 2.68966E-08 | stable | OGDHL        |
| 2.70672E-08 | stable | RAD51AP1     |
| 2.70737E-08 | stable | CLCN7        |
| 2.76622E-08 | stable | ING3         |
| 2.83025E-08 | stable | C20ORF46     |
| 2.83755E-08 | stable | PRDX4        |
| 2.8439E-08  | stable | CPSF4        |
| 2.87025E-08 | stable | TESSP2       |
| 2.87609E-08 | stable | PPP2CB       |
| 2.8961E-08  | stable | LOC651309    |
| 2.93022E-08 | stable | GAST         |
| 2.93765E-08 | stable | GHITM        |
| 2.93765E-08 | stable | RAB27A       |
| 2.93765E-08 | stable | TRAF6        |
| 2.96932E-08 | stable | MRPS6        |
| 2.97016E-08 | stable | LOC388681    |
| 2.97831E-08 | stable | ZNF204       |
| 3.00078E-08 | stable | ADPGK        |
| 3.05506E-08 | stable | AASS         |
| 3.06801E-08 | stable | SLC9A9       |
| 3.08849E-08 | stable | ATF5         |
| 3.08849E-08 | stable | SYT15        |
| 3.08849E-08 | stable | RCE1         |
| 3.10173E-08 | stable | RP5-1022P6.2 |
| 3.10173E-08 | stable | MLLT10       |
| 3.1021E-08  | stable | LTA4H        |
| 3.16014E-08 | stable | CORO6        |
| 3.16446E-08 | stable | TMEM88       |
| 3.16684E-08 | stable | LOC92270     |
| 3.16884E-08 | stable | LACE1        |
| 3.17221E-08 | stable | UBE2H        |
| 3.1799E-08  | stable | C1ORF50      |
| 3.18715E-08 | stable | PIGP         |
| 3.1979E-08  | stable | PURA         |
| 3.22185E-08 | stable | TMEM154      |
| 3.23564E-08 | stable | FRAS1        |
| 3.26919E-08 | stable | PPP2R5A      |
| 3.29191E-08 | stable | RPUSD1       |
| 3.32275E-08 | stable | FBXW11       |

## DEG.infomation

|             |        |            |
|-------------|--------|------------|
| 3.32275E-08 | stable | SLC39A11   |
| 3.32275E-08 | stable | SCYL1BP1   |
| 3.34614E-08 | down   | GADD45B    |
| 3.35528E-08 | stable | PTEN       |
| 3.40397E-08 | stable | TNFAIP6    |
| 3.45704E-08 | stable | RAP1GAP    |
| 3.49672E-08 | stable | SVEP1      |
| 3.50541E-08 | stable | ANKAR      |
| 3.52151E-08 | stable | COMMD8     |
| 3.53999E-08 | stable | ABCB4      |
| 3.54144E-08 | stable | GRINL1A    |
| 3.55811E-08 | stable | FKBP9L     |
| 3.61001E-08 | stable | VPS26B     |
| 3.61693E-08 | stable | FPR2       |
| 3.651E-08   | stable | ENPEP      |
| 3.654E-08   | stable | VPS52      |
| 3.67964E-08 | stable | TOP1MT     |
| 3.69943E-08 | stable | RNF219     |
| 3.69943E-08 | stable | NCRNA00153 |
| 3.70351E-08 | stable | NEXN       |
| 3.71469E-08 | stable | GCNT2      |
| 3.76063E-08 | down   | TMEM158    |
| 3.77308E-08 | stable | JMJD1A     |
| 3.78297E-08 | stable | ADPRHL1    |
| 3.81595E-08 | stable | PTGES2     |
| 3.82539E-08 | stable | LOC653904  |
| 3.83464E-08 | stable | CHIC2      |
| 3.83464E-08 | stable | TMEM11     |
| 3.84961E-08 | stable | FAM69B     |
| 3.87709E-08 | stable | GPR34      |
| 3.89423E-08 | down   | TNC        |
| 3.93663E-08 | stable | ABTB1      |
| 3.9683E-08  | stable | ITGB3      |
| 3.97003E-08 | stable | KIAA0672   |
| 3.97417E-08 | stable | HTATIP2    |
| 3.99082E-08 | stable | TTPAL      |
| 3.99984E-08 | stable | GOPC       |
| 3.99984E-08 | stable | PKIG       |
| 4.00197E-08 | stable | LOC440733  |
| 4.06043E-08 | stable | FXYD5      |
| 4.09636E-08 | stable | TLN2       |
| 4.11609E-08 | stable | RPL37      |
| 4.11653E-08 | stable | ARID5A     |
| 4.11849E-08 | stable | BRD7       |
| 4.12118E-08 | stable | C11ORF46   |
| 4.12455E-08 | stable | LYSMD4     |
| 4.127E-08   | stable | SPHK1      |
| 4.19962E-08 | stable | KAZALD1    |
| 4.21499E-08 | stable | ASNS       |
| 4.21857E-08 | stable | FLJ40142   |
| 4.25444E-08 | stable | KIAA1160   |

## DEG.infomation

|             |        |           |
|-------------|--------|-----------|
| 4.3269E-08  | stable | MRPL40    |
| 4.33372E-08 | stable | SYVN1     |
| 4.36385E-08 | stable | CTPS2     |
| 4.40201E-08 | stable | MAGEE1    |
| 4.40409E-08 | stable | SBF1      |
| 4.43484E-08 | stable | PKNOX2    |
| 4.45532E-08 | stable | HNRPUL1   |
| 4.46374E-08 | stable | CLCF1     |
| 4.50507E-08 | stable | HLA-B     |
| 4.50827E-08 | stable | FLJ14213  |
| 4.50956E-08 | stable | TGFA      |
| 4.52658E-08 | stable | ZNF684    |
| 4.5698E-08  | stable | PIP5K1C   |
| 4.57866E-08 | stable | ZFPM2     |
| 4.60287E-08 | stable | ALPK1     |
| 4.67551E-08 | stable | ALDH16A1  |
| 4.68843E-08 | down   | RAB15     |
| 4.74707E-08 | stable | SMPDL3A   |
| 4.81271E-08 | stable | NDC80     |
| 4.82397E-08 | stable | INTS2     |
| 4.83392E-08 | up     | UCHL1     |
| 4.84084E-08 | stable | LOC652002 |
| 4.84484E-08 | stable | TMEM147   |
| 4.87843E-08 | stable | THOP1     |
| 4.8814E-08  | stable | C17ORF61  |
| 4.93949E-08 | stable | PSMD8     |
| 4.93949E-08 | stable | THOC4     |
| 4.95552E-08 | stable | PAK1      |
| 4.99221E-08 | stable | PDE6B     |
| 5.0549E-08  | stable | RAG1AP1   |
| 5.07829E-08 | stable | LRIG3     |
| 5.08582E-08 | stable | ACAT1     |
| 5.10233E-08 | stable | LOC643961 |
| 5.22842E-08 | stable | LAMA5     |
| 5.23757E-08 | stable | TNFAIP2   |
| 5.33425E-08 | stable | SF3B1     |
| 5.34511E-08 | stable | STK40     |
| 5.35618E-08 | stable | FLJ10081  |
| 5.38432E-08 | stable | PRKX      |
| 5.40059E-08 | stable | PBX1      |
| 5.41173E-08 | stable | NOV       |
| 5.49249E-08 | stable | RALB      |
| 5.49904E-08 | stable | SRGAP1    |
| 5.50198E-08 | stable | TXNDC12   |
| 5.52937E-08 | stable | RABL4     |
| 5.53E-08    | stable | CARM1     |
| 5.5951E-08  | stable | EHD1      |
| 5.60618E-08 | stable | CLASP2    |
| 5.65465E-08 | stable | TADA1L    |
| 5.68194E-08 | stable | NANS      |
| 5.69189E-08 | stable | LOC652164 |

## DEG.infomation

|             |        |           |
|-------------|--------|-----------|
| 5.73548E-08 | stable | BHLHB3    |
| 5.75863E-08 | up     | IFIT1     |
| 5.75863E-08 | stable | ACAD10    |
| 5.77819E-08 | stable | MTMR4     |
| 5.80215E-08 | stable | FAT       |
| 5.87141E-08 | stable | PPFIA4    |
| 5.88881E-08 | stable | ZMIZ2     |
| 6.08975E-08 | stable | DHRS7     |
| 6.0981E-08  | stable | BSDC1     |
| 6.25889E-08 | stable | JMJD1B    |
| 6.26189E-08 | stable | PTPRR     |
| 6.29287E-08 | stable | PDIK1L    |
| 6.31775E-08 | stable | MTMR2     |
| 6.32902E-08 | stable | POLE4     |
| 6.35337E-08 | stable | STX19     |
| 6.36641E-08 | stable | RAD17     |
| 6.39108E-08 | stable | C14ORF133 |
| 6.44246E-08 | stable | LOC440503 |
| 6.44678E-08 | stable | EMP1      |
| 6.45334E-08 | stable | RAGE      |
| 6.52344E-08 | stable | NPHP4     |
| 6.52893E-08 | stable | ABCG1     |
| 6.52986E-08 | stable | MXI1      |
| 6.52986E-08 | stable | DBP       |
| 6.57511E-08 | stable | ATP1B4    |
| 6.76165E-08 | stable | IFNAR2    |
| 6.76617E-08 | stable | PPP1CA    |
| 6.82753E-08 | stable | NOL8      |
| 6.97345E-08 | stable | NAP5      |
| 6.99788E-08 | stable | COL9A1    |
| 6.99788E-08 | stable | PTPN4     |
| 7.0172E-08  | stable | RFC1      |
| 7.0871E-08  | stable | BMP1      |
| 7.08893E-08 | stable | SDCBP     |
| 7.11529E-08 | stable | KIAA0889  |
| 7.12387E-08 | stable | FCGR2B    |
| 7.14435E-08 | stable | C15ORF17  |
| 7.2016E-08  | stable | SLC36A1   |
| 7.20248E-08 | stable | PSD4      |
| 7.20248E-08 | stable | REPS2     |
| 7.34222E-08 | stable | SH3RF1    |
| 7.34606E-08 | stable | FKBP4     |
| 7.36782E-08 | stable | C10RF213  |
| 7.55685E-08 | stable | CD55      |
| 7.61242E-08 | stable | SLC9A1    |
| 7.63882E-08 | stable | CASD1     |
| 7.71211E-08 | stable | TMEFF2    |
| 7.71934E-08 | stable | C20ORF200 |
| 7.73291E-08 | stable | RAB35     |
| 7.73291E-08 | stable | HEATR1    |
| 7.78733E-08 | stable | AGL       |

## DEG.infomation

|             |        |           |
|-------------|--------|-----------|
| 7.84421E-08 | stable | WDR74     |
| 7.928E-08   | stable | RAB26     |
| 8.02904E-08 | down   | LAD1      |
| 8.15288E-08 | stable | SLC4A2    |
| 8.1554E-08  | stable | GTF2E2    |
| 8.17792E-08 | stable | WDR51A    |
| 8.24139E-08 | stable | ZCCHC9    |
| 8.32187E-08 | stable | SYNM      |
| 8.40594E-08 | stable | MRPL10    |
| 8.40594E-08 | stable | LOC644615 |
| 8.41123E-08 | stable | YWHAZ     |
| 8.50622E-08 | stable | GRWD1     |
| 8.56451E-08 | stable | EXOC7     |
| 8.57842E-08 | stable | RNASET2   |
| 8.60016E-08 | stable | HNRPH3    |
| 8.66801E-08 | stable | ARFGAP3   |
| 8.6832E-08  | stable | DUS3L     |
| 8.69629E-08 | stable | RRS1      |
| 8.7318E-08  | stable | SDCCAG10  |
| 8.7657E-08  | stable | FAM43B    |
| 8.90716E-08 | stable | ICA1L     |
| 8.94817E-08 | stable | NLRX1     |
| 8.95071E-08 | stable | LOC646168 |
| 9.04018E-08 | stable | ZCWPW2    |
| 9.2312E-08  | up     | COMP      |
| 9.40608E-08 | up     | AEBP1     |
| 9.45186E-08 | stable | AARS      |
| 9.51666E-08 | stable | ZCRB1     |
| 9.54724E-08 | stable | SYTL2     |
| 9.5917E-08  | stable | TNNI3     |
| 9.60917E-08 | stable | HSD17B10  |
| 9.62389E-08 | stable | FAM70B    |
| 9.6554E-08  | stable | ARNTL     |
| 9.72623E-08 | stable | LIPT1     |
| 9.74714E-08 | stable | MED12     |
| 9.75912E-08 | stable | GON4L     |
| 9.88298E-08 | stable | CARKD     |
| 9.98187E-08 | down   | AMY1C     |
| 1.00284E-07 | stable | STAG3L4   |
| 1.00358E-07 | stable | ANAPC10   |
| 1.00778E-07 | stable | REST      |
| 1.0145E-07  | stable | ELF3      |
| 1.02242E-07 | stable | ABHD5     |
| 1.02294E-07 | stable | NEK6      |
| 1.02723E-07 | stable | RYR3      |
| 1.02762E-07 | stable | MIER2     |
| 1.03666E-07 | stable | SLC6A6    |
| 1.04403E-07 | stable | PPARGC1B  |
| 1.05349E-07 | stable | PTGER4    |
| 1.06034E-07 | stable | SLC30A9   |
| 1.07875E-07 | stable | UACA      |

DEG.infomation

|             |        |            |
|-------------|--------|------------|
| 1.07875E-07 | stable | TMEM205    |
| 1.07895E-07 | stable | LGALS9     |
| 1.09406E-07 | stable | PEX7       |
| 1.09511E-07 | stable | ERCC6      |
| 1.09697E-07 | stable | CC2D2A     |
| 1.10447E-07 | stable | C3ORF1     |
| 1.11305E-07 | stable | GNL2       |
| 1.11341E-07 | up     | PTPN3      |
| 1.11341E-07 | stable | C10ORF104  |
| 1.11618E-07 | stable | TARBP1     |
| 1.11975E-07 | stable | MTHFD1L    |
| 1.15674E-07 | stable | FAM108C1   |
| 1.16692E-07 | stable | F8         |
| 1.17378E-07 | stable | SASH3      |
| 1.21519E-07 | stable | PRCC       |
| 1.21894E-07 | stable | PDZD4      |
| 1.22636E-07 | stable | OR51E1     |
| 1.22636E-07 | stable | NACA       |
| 1.22726E-07 | stable | RAB32      |
| 1.22894E-07 | stable | ASRGL1     |
| 1.25307E-07 | stable | ST6GALNAC4 |
| 1.25672E-07 | stable | MGAT1      |
| 1.25981E-07 | stable | INADL      |
| 1.27161E-07 | stable | SOX11      |
| 1.27424E-07 | stable | CRNKL1     |
| 1.28377E-07 | stable | CIRH1A     |
| 1.29919E-07 | stable | ARHGEF18   |
| 1.30178E-07 | stable | LPHN3      |
| 1.30549E-07 | stable | FAM73B     |
| 1.31092E-07 | stable | IMPACT     |
| 1.32026E-07 | stable | SCYL3      |
| 1.32055E-07 | stable | C6ORF125   |
| 1.3248E-07  | stable | ATP6V0A1   |
| 1.32493E-07 | stable | C20ORF166  |
| 1.33178E-07 | stable | TBC1D7     |
| 1.33616E-07 | stable | PLCG1      |
| 1.34258E-07 | stable | YPEL3      |
| 1.34491E-07 | stable | LOC285359  |
| 1.34553E-07 | stable | ZC3H14     |
| 1.34976E-07 | stable | PI4KAP1    |
| 1.34976E-07 | stable | PAK2       |
| 1.36382E-07 | stable | KLHDC2     |
| 1.36745E-07 | stable | CMTM6      |
| 1.36933E-07 | stable | STK38      |
| 1.37926E-07 | stable | WFDC1      |
| 1.37966E-07 | stable | CHMP4B     |
| 1.38101E-07 | stable | NRAS       |
| 1.40293E-07 | stable | ALS2CR8    |
| 1.42491E-07 | stable | FAM179B    |
| 1.43281E-07 | stable | AKR1A1     |
| 1.43479E-07 | stable | OPA1       |

DEG.infomation

|             |        |           |
|-------------|--------|-----------|
| 1.46485E-07 | stable | PFKFB2    |
| 1.47269E-07 | stable | LOC643319 |
| 1.47557E-07 | stable | CROP      |
| 1.48793E-07 | stable | DIP2B     |
| 1.48863E-07 | stable | TMEM116   |
| 1.49336E-07 | stable | RHEB      |
| 1.51199E-07 | stable | PRKCSH    |
| 1.51944E-07 | stable | MPHOSPH9  |
| 1.5347E-07  | stable | FAM50A    |
| 1.5347E-07  | stable | MAP4K4    |
| 1.53976E-07 | stable | FLJ45244  |
| 1.54523E-07 | stable | PTTG1IP   |
| 1.56484E-07 | stable | C17ORF44  |
| 1.56829E-07 | stable | GMPPA     |
| 1.5705E-07  | stable | RRAS      |
| 1.5754E-07  | stable | TMTC1     |
| 1.58118E-07 | stable | AMD1      |
| 1.58388E-07 | stable | IGSF21    |
| 1.58586E-07 | stable | IL10RB    |
| 1.58661E-07 | stable | CD93      |
| 1.5909E-07  | stable | PDSS1     |
| 1.59181E-07 | stable | ENG       |
| 1.59464E-07 | stable | PDZRN3    |
| 1.60028E-07 | stable | S100A6    |
| 1.60174E-07 | up     | MYL7      |
| 1.6025E-07  | stable | C11ORF17  |
| 1.61852E-07 | stable | MMP23B    |
| 1.63128E-07 | stable | OSBPL9    |
| 1.63611E-07 | stable | SGPP2     |
| 1.64526E-07 | stable | VRK1      |
| 1.64882E-07 | stable | EIF6      |
| 1.6529E-07  | stable | ATF4      |
| 1.66965E-07 | stable | LOC653377 |
| 1.67012E-07 | stable | NFE2      |
| 1.67012E-07 | stable | FNDC4     |
| 1.6826E-07  | stable | APOM      |
| 1.70721E-07 | stable | PLEKHG3   |
| 1.71336E-07 | down   | SLC38A2   |
| 1.71336E-07 | stable | AP2M1     |
| 1.71629E-07 | stable | HSZFP36   |
| 1.72167E-07 | stable | LZTS1     |
| 1.72962E-07 | stable | WDR62     |
| 1.73579E-07 | stable | CLNS1A    |
| 1.7428E-07  | stable | CCNG2     |
| 1.74808E-07 | stable | AP3S2     |
| 1.75587E-07 | stable | FGF7      |
| 1.75758E-07 | stable | AMT       |
| 1.76538E-07 | stable | ST8SIA4   |
| 1.77531E-07 | stable | PREX1     |
| 1.80029E-07 | stable | FZD9      |
| 1.82367E-07 | stable | LRRN3     |

## DEG.infomation

|             |        |           |
|-------------|--------|-----------|
| 1.84302E-07 | stable | TRIM52    |
| 1.87393E-07 | stable | MGRN1     |
| 1.88206E-07 | down   | THBS1     |
| 1.88221E-07 | stable | TMEM55A   |
| 1.90089E-07 | stable | C12ORF26  |
| 1.91903E-07 | stable | OSGEP     |
| 1.91903E-07 | stable | GCLC      |
| 1.94552E-07 | stable | LOC648470 |
| 1.94592E-07 | stable | PRR13     |
| 1.9717E-07  | stable | CLK1      |
| 1.97891E-07 | stable | PRPF4     |
| 1.98525E-07 | stable | TSPAN9    |
| 1.99949E-07 | stable | EFTUD1    |
| 2.00685E-07 | stable | HINT3     |
| 2.0282E-07  | stable | GOLPH3    |
| 2.02924E-07 | stable | C7ORF23   |
| 2.03617E-07 | stable | ST3GAL3   |
| 2.04901E-07 | stable | LOC338758 |
| 2.05277E-07 | stable | ABCC8     |
| 2.06918E-07 | stable | LOC731895 |
| 2.07931E-07 | stable | LST1      |
| 2.07931E-07 | up     | FSD2      |
| 2.08932E-07 | stable | ABCE1     |
| 2.104E-07   | stable | BCAS4     |
| 2.10454E-07 | stable | ABCB6     |
| 2.11389E-07 | stable | PDPN      |
| 2.13071E-07 | stable | ACOX1     |
| 2.14679E-07 | stable | BP75      |
| 2.15017E-07 | stable | C15ORF58  |
| 2.17723E-07 | stable | GBAS      |
| 2.17782E-07 | stable | CITED2    |
| 2.18079E-07 | stable | LOC647108 |
| 2.18288E-07 | stable | YTHDF1    |
| 2.18406E-07 | stable | ALDH7A1   |
| 2.19577E-07 | stable | TMEM115   |
| 2.23039E-07 | stable | MT3       |
| 2.23192E-07 | stable | UFSP2     |
| 2.23399E-07 | stable | ZNF426    |
| 2.23564E-07 | stable | GPT       |
| 2.243E-07   | stable | PCDH1     |
| 2.2655E-07  | stable | ZNF350    |
| 2.27077E-07 | stable | HAS2      |
| 2.27592E-07 | stable | DDIT4L    |
| 2.27795E-07 | stable | FREM1     |
| 2.30293E-07 | stable | PANK1     |
| 2.3034E-07  | stable | C16ORF35  |
| 2.33272E-07 | stable | CYGB      |
| 2.34718E-07 | stable | ZNF512    |
| 2.36985E-07 | stable | C17ORF53  |
| 2.36985E-07 | stable | CCDC55    |
| 2.46412E-07 | stable | BMPR1A    |



## DEG.infomation

|             |        |           |
|-------------|--------|-----------|
| 2.46918E-07 | stable | MAFF      |
| 2.51335E-07 | down   | DUSP5     |
| 2.52214E-07 | stable | PLOD3     |
| 2.52772E-07 | stable | GLIS3     |
| 2.54935E-07 | stable | EVL       |
| 2.57542E-07 | stable | TNNT3     |
| 2.57664E-07 | stable | VAMP5     |
| 2.5809E-07  | stable | ARPC1A    |
| 2.60061E-07 | stable | MRPL45    |
| 2.60973E-07 | stable | C9ORF9    |
| 2.61705E-07 | stable | VNN2      |
| 2.61705E-07 | stable | FLOT2     |
| 2.62759E-07 | stable | SYT11     |
| 2.65384E-07 | stable | PYCR2     |
| 2.67678E-07 | stable | LOC644310 |
| 2.67989E-07 | stable | NGF       |
| 2.67989E-07 | stable | DHRX      |
| 2.70177E-07 | stable | DDX21     |
| 2.70177E-07 | stable | LOC388588 |
| 2.71555E-07 | stable | VIP       |
| 2.71669E-07 | stable | DNAJB11   |
| 2.71854E-07 | stable | PLEKHA2   |
| 2.71854E-07 | stable | KBTBD4    |
| 2.72552E-07 | stable | ZXDA      |
| 2.72857E-07 | stable | HOXB1     |
| 2.77224E-07 | stable | ABI3      |
| 2.77341E-07 | stable | ROGDI     |
| 2.78913E-07 | stable | HNRPM     |
| 2.82586E-07 | stable | IQWD1     |
| 2.83118E-07 | stable | GPR44     |
| 2.83961E-07 | stable | TNFSF10   |
| 2.84184E-07 | stable | STX2      |
| 2.84309E-07 | stable | HDAC3     |
| 2.84384E-07 | stable | NTN4      |
| 2.84463E-07 | stable | DUS4L     |
| 2.85552E-07 | stable | LOC93622  |
| 2.86137E-07 | stable | ZNF550    |
| 2.87258E-07 | stable | ARMCX6    |
| 2.88272E-07 | stable | UPP1      |
| 2.90517E-07 | stable | HAGH      |
| 2.90632E-07 | stable | DYRK2     |
| 2.92906E-07 | stable | ALS2CR4   |
| 2.92906E-07 | stable | GPRIN3    |
| 2.94442E-07 | stable | FLJ10213  |
| 2.96347E-07 | stable | EFEMP1    |
| 2.96844E-07 | stable | CDKN2C    |
| 2.98197E-07 | stable | ZNF605    |
| 2.99581E-07 | stable | ZNF493    |
| 3.02796E-07 | stable | PTPN6     |
| 3.03511E-07 | stable | ALG9      |
| 3.0399E-07  | stable | SEPW1     |

## DEG.infomation

|             |        |           |
|-------------|--------|-----------|
| 3.18127E-07 | stable | DNAJC24   |
| 3.20663E-07 | stable | C1ORF190  |
| 3.21157E-07 | stable | CTRC      |
| 3.24149E-07 | stable | CHRD      |
| 3.24593E-07 | stable | PEX16     |
| 3.25778E-07 | stable | HMG20B    |
| 3.26622E-07 | stable | SLC25A30  |
| 3.29082E-07 | stable | ZNF133    |
| 3.36114E-07 | stable | PLA2G7    |
| 3.39016E-07 | stable | PERP      |
| 3.39016E-07 | stable | SATB1     |
| 3.41123E-07 | stable | BCL2      |
| 3.45822E-07 | stable | PCDHGB4   |
| 3.47071E-07 | stable | TUBB2B    |
| 3.51541E-07 | stable | RNF150    |
| 3.52819E-07 | down   | KBTBD5    |
| 3.54299E-07 | stable | PHF21A    |
| 3.56478E-07 | stable | CP110     |
| 3.58001E-07 | stable | EDA2R     |
| 3.58623E-07 | stable | CNOT6     |
| 3.59161E-07 | stable | KRTCAP2   |
| 3.59358E-07 | stable | ZNF385D   |
| 3.60561E-07 | up     | LEPREL1   |
| 3.61995E-07 | stable | RBM16     |
| 3.64214E-07 | stable | DGAT1     |
| 3.64682E-07 | stable | KCTD15    |
| 3.65809E-07 | stable | PDE1A     |
| 3.67083E-07 | stable | KLHL21    |
| 3.68194E-07 | stable | PPAN      |
| 3.7074E-07  | stable | CRADD     |
| 3.717E-07   | stable | PDIA6     |
| 3.74887E-07 | stable | RALGDS    |
| 3.75752E-07 | stable | FLVCR2    |
| 3.7604E-07  | stable | ROD1      |
| 3.78587E-07 | stable | DDX56     |
| 3.78893E-07 | stable | LOC400214 |
| 3.78971E-07 | stable | ZNF701    |
| 3.80519E-07 | stable | SLC25A38  |
| 3.81408E-07 | stable | C20ORF54  |
| 3.82749E-07 | stable | KRBA2     |
| 3.84024E-07 | stable | ACSL5     |
| 3.89878E-07 | stable | RBMS1     |
| 3.90281E-07 | stable | NT5C3     |
| 3.92412E-07 | stable | LACTB     |
| 3.96999E-07 | stable | PHKB      |
| 4.0313E-07  | stable | PTPRU     |
| 4.04641E-07 | stable | TBC1D2    |
| 4.05117E-07 | stable | SOBP      |
| 4.05185E-07 | stable | IL20RA    |
| 4.05267E-07 | stable | NOS3      |
| 4.06815E-07 | stable | SEMA3F    |

## DEG.infomation

|             |        |           |
|-------------|--------|-----------|
| 4.12084E-07 | stable | RGS16     |
| 4.12969E-07 | stable | SH3PXD2B  |
| 4.13453E-07 | stable | IFT122    |
| 4.14611E-07 | stable | HIF1A     |
| 4.15519E-07 | stable | ARID4A    |
| 4.15932E-07 | stable | RNF14     |
| 4.16795E-07 | stable | UBE2L6    |
| 4.17228E-07 | stable | MYOCD     |
| 4.20184E-07 | stable | CBY1      |
| 4.21927E-07 | stable | KBTBD10   |
| 4.23398E-07 | stable | LOC651302 |
| 4.28713E-07 | stable | NCAPD3    |
| 4.29051E-07 | stable | NIPSNAP1  |
| 4.32448E-07 | stable | SLCO5A1   |
| 4.34382E-07 | stable | RPS6KA1   |
| 4.41856E-07 | stable | ECE2      |
| 4.42585E-07 | stable | TPR       |
| 4.44092E-07 | stable | DNAJC18   |
| 4.48122E-07 | stable | SRP14P1   |
| 4.49651E-07 | stable | B3GALTL   |
| 4.5189E-07  | stable | MED22     |
| 4.58552E-07 | stable | CIP29     |
| 4.6014E-07  | stable | PTGES     |
| 4.73848E-07 | stable | SLC22A4   |
| 4.76965E-07 | stable | LOC150763 |
| 4.79356E-07 | stable | SMAD9     |
| 4.80661E-07 | stable | JAZF1     |
| 4.82948E-07 | stable | TXLNB     |
| 4.95929E-07 | stable | TATDN3    |
| 4.95929E-07 | stable | NECAB1    |
| 4.97193E-07 | stable | DENND2D   |
| 5.0313E-07  | stable | POLR3D    |
| 5.07825E-07 | stable | YIF1B     |
| 5.12666E-07 | stable | GUCY1A2   |
| 5.12893E-07 | stable | TM4SF18   |
| 5.13989E-07 | stable | COL23A1   |
| 5.14216E-07 | stable | NOSTRIN   |
| 5.14216E-07 | up     | TNNI3K    |
| 5.14216E-07 | stable | GPHN      |
| 5.15412E-07 | stable | PRKCZ     |
| 5.1793E-07  | stable | MPL       |
| 5.20598E-07 | stable | UBE2Z     |
| 5.20911E-07 | stable | TDRD6     |
| 5.27646E-07 | stable | CYP11A1   |
| 5.27646E-07 | stable | SRRM1L    |
| 5.28366E-07 | stable | HERC1     |
| 5.36235E-07 | stable | SLC7A8    |
| 5.39045E-07 | stable | LOC650737 |
| 5.42005E-07 | stable | TNIP1     |
| 5.42905E-07 | stable | GPA33     |
| 5.43425E-07 | stable | CACNB3    |

DEG.infomation

|             |        |           |
|-------------|--------|-----------|
| 5.43425E-07 | stable | DSC1      |
| 5.54219E-07 | stable | SRR       |
| 5.57548E-07 | stable | KATNB1    |
| 5.57641E-07 | stable | GYLTL1B   |
| 5.62461E-07 | stable | ACOT7     |
| 5.66179E-07 | stable | FIS1      |
| 5.68622E-07 | stable | VPS29     |
| 5.69284E-07 | stable | TLR8      |
| 5.72731E-07 | stable | SPATA18   |
| 5.7438E-07  | stable | KIAA1009  |
| 5.7438E-07  | stable | RORC      |
| 5.77783E-07 | stable | CABC1     |
| 5.78226E-07 | stable | PDE4B     |
| 5.79798E-07 | stable | SCRIB     |
| 5.80762E-07 | stable | MARK1     |
| 5.87306E-07 | stable | JTV1      |
| 5.90097E-07 | stable | CSPG4     |
| 5.95014E-07 | stable | M6PR      |
| 5.95027E-07 | stable | BEX5      |
| 5.98781E-07 | stable | FLJ20125  |
| 5.98955E-07 | stable | LOC285074 |
| 6.04343E-07 | stable | P704P     |
| 6.06835E-07 | stable | C10ORF57  |
| 6.08603E-07 | stable | ARHGDIB   |
| 6.0912E-07  | stable | FECH      |
| 6.12057E-07 | stable | METTL1    |
| 6.19213E-07 | stable | RNH1      |
| 6.28327E-07 | stable | GRM8      |
| 6.28865E-07 | stable | DNMT1     |
| 6.36775E-07 | stable | SFRS5     |
| 6.43855E-07 | stable | SH2B1     |
| 6.43855E-07 | stable | SLC4A7    |
| 6.44335E-07 | stable | PRICKLE2  |
| 6.47417E-07 | stable | ADA       |
| 6.51431E-07 | stable | BRF2      |
| 6.58099E-07 | stable | HLA-C     |
| 6.58807E-07 | stable | CCL21     |
| 6.59615E-07 | stable | IDS       |
| 6.6218E-07  | stable | SUV39H1   |
| 6.63594E-07 | stable | TAGLN2    |
| 6.65092E-07 | stable | FLJ10246  |
| 6.67233E-07 | stable | UQCR      |
| 6.67834E-07 | stable | WDR66     |
| 6.7196E-07  | stable | MCOLN1    |
| 6.72924E-07 | stable | DHX15     |
| 6.72952E-07 | stable | LOC643452 |
| 6.75057E-07 | stable | PIP4K2B   |
| 6.75266E-07 | stable | ASB5      |
| 6.75735E-07 | stable | GPR146    |
| 6.77656E-07 | stable | CCDC90A   |
| 6.88639E-07 | stable | CAMK2A    |

## DEG.infomation

|             |        |           |
|-------------|--------|-----------|
| 6.98561E-07 | stable | MRPL46    |
| 7.01241E-07 | stable | GCLM      |
| 7.05016E-07 | stable | SLAMF1    |
| 7.08738E-07 | stable | CEBPG     |
| 7.09235E-07 | stable | SHPK      |
| 7.17525E-07 | stable | SNORD68   |
| 7.18077E-07 | stable | COPE      |
| 7.18682E-07 | stable | OAF       |
| 7.20082E-07 | stable | AP4B1     |
| 7.2355E-07  | stable | TSPAN17   |
| 7.2401E-07  | stable | XPR1      |
| 7.24037E-07 | stable | ABCF1     |
| 7.33344E-07 | stable | MAPK9     |
| 7.35608E-07 | stable | MRPS27    |
| 7.35608E-07 | stable | ZFR       |
| 7.41715E-07 | stable | ZNF442    |
| 7.44267E-07 | stable | PPP1R3D   |
| 7.46096E-07 | stable | CCDC115   |
| 7.46096E-07 | stable | SEC24D    |
| 7.47518E-07 | stable | HDGF      |
| 7.52055E-07 | stable | ZNF197    |
| 7.56079E-07 | stable | SUGT1     |
| 7.59984E-07 | stable | FOSL2     |
| 7.61997E-07 | stable | CKAP2     |
| 7.62945E-07 | stable | STARD13   |
| 7.7282E-07  | stable | PECI      |
| 7.76274E-07 | stable | ZNF717    |
| 7.76951E-07 | stable | RALGPS1   |
| 7.77796E-07 | stable | COMMD10   |
| 7.81208E-07 | stable | FAM122B   |
| 7.84862E-07 | stable | NUDT5     |
| 7.8703E-07  | stable | GRINA     |
| 7.88872E-07 | stable | ASCC2     |
| 7.89466E-07 | stable | S100P     |
| 7.90617E-07 | stable | CFH       |
| 7.91205E-07 | stable | MAOB      |
| 7.95533E-07 | stable | TRIM23    |
| 7.99258E-07 | stable | MSN       |
| 8.01442E-07 | stable | TTC23     |
| 8.01992E-07 | stable | LOC731950 |
| 8.04054E-07 | stable | C5ORF30   |
| 8.07969E-07 | stable | NPTXR     |
| 8.09905E-07 | stable | RPL34     |
| 8.10241E-07 | stable | ZFP36L2   |
| 8.12517E-07 | stable | COMMD6    |
| 8.14152E-07 | stable | SLC16A5   |
| 8.23945E-07 | stable | CCDC141   |
| 8.2807E-07  | stable | PYGB      |
| 8.29012E-07 | stable | SRPX      |
| 8.38174E-07 | stable | LOC400027 |
| 8.40035E-07 | stable | COPS4     |

## DEG.infomation

|             |        |           |
|-------------|--------|-----------|
| 8.41373E-07 | stable | RRP12     |
| 8.42536E-07 | stable | ABHD10    |
| 8.50176E-07 | stable | PPP1R1C   |
| 8.52993E-07 | stable | VASN      |
| 8.55818E-07 | stable | POGK      |
| 8.62726E-07 | stable | LOC728452 |
| 8.69118E-07 | stable | SMARCA2   |
| 8.76039E-07 | stable | ENOX2     |
| 8.78746E-07 | stable | ZNF10     |
| 8.82793E-07 | stable | PRO0628   |
| 8.84778E-07 | stable | LOC649049 |
| 8.90033E-07 | stable | STK3      |
| 8.90859E-07 | stable | SLC8A1    |
| 8.93016E-07 | stable | LTBP3     |
| 8.9679E-07  | stable | LOC728519 |
| 9.01719E-07 | stable | CXCL6     |
| 9.14152E-07 | stable | RPS6KB2   |
| 9.14481E-07 | stable | TOMM40L   |
| 9.20774E-07 | stable | C1ORF83   |
| 9.20902E-07 | stable | LOC400890 |
| 9.21058E-07 | stable | KIAA0240  |
| 9.2666E-07  | stable | EFHD1     |
| 9.27636E-07 | stable | C20ORF116 |
| 9.30723E-07 | stable | HDC       |
| 9.39152E-07 | stable | PEX19     |
| 9.39934E-07 | stable | ZFP37     |
| 9.40069E-07 | stable | JUND      |
| 9.45129E-07 | stable | LOC145814 |
| 9.5545E-07  | stable | WFDC3     |
| 9.60954E-07 | stable | MYNN      |
| 9.66511E-07 | stable | ADAMTS5   |
| 9.70368E-07 | stable | LONP2     |
| 9.71381E-07 | stable | ZNF610    |
| 9.771E-07   | stable | CEP68     |
| 9.79499E-07 | stable | C6ORF162  |
| 9.95612E-07 | stable | ZNF175    |
| 9.97534E-07 | stable | DAZAP1    |
| 9.98183E-07 | stable | LILRB4    |
| 1.00693E-06 | stable | ZNF271    |
| 1.00772E-06 | stable | CTNND2    |
| 1.00931E-06 | stable | C7ORF54   |
| 1.01097E-06 | stable | TIMP2     |
| 1.01525E-06 | stable | LOC645378 |
| 1.01525E-06 | stable | LIPA      |
| 1.01525E-06 | stable | NRM       |
| 1.01967E-06 | stable | RAB4B     |
| 1.02812E-06 | stable | AGPAT1    |
| 1.03213E-06 | stable | TPST2     |
| 1.04146E-06 | stable | C22ORF40  |
| 1.04521E-06 | stable | LOC653171 |
| 1.05871E-06 | stable | RALBP1    |

## DEG.infomation

|             |        |           |
|-------------|--------|-----------|
| 1.06629E-06 | stable | SEH1L     |
| 1.07091E-06 | stable | RPS2      |
| 1.07569E-06 | stable | NVL       |
| 1.0769E-06  | stable | POLR2C    |
| 1.07798E-06 | stable | HSPC111   |
| 1.07991E-06 | stable | RBM39     |
| 1.08059E-06 | stable | ATP6V1D   |
| 1.08071E-06 | stable | DYNC1H1   |
| 1.08377E-06 | stable | DBT       |
| 1.09908E-06 | stable | LOC646849 |
| 1.10147E-06 | stable | MRPS16    |
| 1.10942E-06 | stable | TK2       |
| 1.12491E-06 | stable | VPS37C    |
| 1.12648E-06 | stable | HDAC9     |
| 1.13096E-06 | stable | CDC2L6    |
| 1.13442E-06 | stable | SCRN3     |
| 1.13576E-06 | stable | PPP2R3A   |
| 1.13576E-06 | stable | LASP1     |
| 1.13706E-06 | stable | LRG1      |
| 1.14261E-06 | stable | MYST4     |
| 1.14728E-06 | stable | GABARAPL1 |
| 1.15498E-06 | stable | PIN4      |
| 1.15643E-06 | stable | RIC3      |
| 1.15643E-06 | stable | NPM3      |
| 1.15878E-06 | stable | RHPN2     |
| 1.15984E-06 | stable | CRIP3     |
| 1.17029E-06 | stable | HADH      |
| 1.17066E-06 | stable | MYOM2     |
| 1.17395E-06 | stable | CREB5     |
| 1.18322E-06 | stable | EDN3      |
| 1.18449E-06 | stable | GRAMD4    |
| 1.19389E-06 | stable | C6ORF203  |
| 1.19519E-06 | stable | CDC25B    |
| 1.197E-06   | stable | CYB5D2    |
| 1.2072E-06  | stable | NCBP2     |
| 1.21078E-06 | stable | CMYA5     |
| 1.21588E-06 | stable | KIAA0232  |
| 1.24331E-06 | stable | SIRT4     |
| 1.26391E-06 | stable | MTA2      |
| 1.28126E-06 | stable | BAG3      |
| 1.28398E-06 | stable | CPA3      |
| 1.29179E-06 | stable | ZNF680    |
| 1.29983E-06 | stable | C3ORF60   |
| 1.30803E-06 | stable | DACT3     |
| 1.30863E-06 | stable | FBXW5     |
| 1.31155E-06 | stable | C1ORF2    |
| 1.31881E-06 | stable | TTC12     |
| 1.32874E-06 | stable | ZNF285A   |
| 1.32989E-06 | stable | PIK3C2B   |
| 1.33046E-06 | stable | F5        |
| 1.33523E-06 | stable | OLFML3    |

## DEG.infomation

|             |        |           |
|-------------|--------|-----------|
| 1.35407E-06 | stable | MAD2L2    |
| 1.37064E-06 | up     | GUCA1C    |
| 1.37593E-06 | stable | ZNF224    |
| 1.38067E-06 | stable | ADORA3    |
| 1.38412E-06 | stable | FKRP      |
| 1.39947E-06 | stable | DLD       |
| 1.40137E-06 | stable | GFOD2     |
| 1.40693E-06 | stable | MBOAT7    |
| 1.41515E-06 | stable | DC2       |
| 1.42109E-06 | stable | LYPD1     |
| 1.42356E-06 | stable | OXA1L     |
| 1.42857E-06 | stable | CECR6     |
| 1.44342E-06 | stable | CCDC8     |
| 1.472E-06   | stable | TRPV2     |
| 1.47483E-06 | stable | GPIHBP1   |
| 1.47518E-06 | stable | TMEM135   |
| 1.47767E-06 | stable | GAL       |
| 1.47908E-06 | stable | PHF5A     |
| 1.49058E-06 | stable | IRF2BP1   |
| 1.49101E-06 | stable | KLF15     |
| 1.50643E-06 | stable | LGALS8    |
| 1.50995E-06 | stable | CSNK2A2   |
| 1.51058E-06 | stable | CD69      |
| 1.51637E-06 | stable | C11ORF31  |
| 1.53074E-06 | stable | PLGLB1    |
| 1.53291E-06 | stable | ANTXR1    |
| 1.53362E-06 | stable | ABHD2     |
| 1.56071E-06 | stable | GNA11     |
| 1.57967E-06 | stable | NIPBL     |
| 1.58153E-06 | stable | ARIH2     |
| 1.64882E-06 | stable | CETN2     |
| 1.6542E-06  | stable | FASTKD1   |
| 1.66156E-06 | stable | FGD6      |
| 1.66277E-06 | stable | HLA-DRA   |
| 1.66485E-06 | stable | MSC       |
| 1.67597E-06 | stable | AP2B1     |
| 1.67972E-06 | stable | APOL3     |
| 1.68162E-06 | stable | ANGPTL4   |
| 1.69003E-06 | stable | C12ORF62  |
| 1.69436E-06 | stable | SCOC      |
| 1.736E-06   | stable | FEM1C     |
| 1.73809E-06 | stable | TRK1      |
| 1.74432E-06 | stable | MAP4K3    |
| 1.7722E-06  | stable | GGNBP2    |
| 1.77613E-06 | stable | DOLPP1    |
| 1.77879E-06 | stable | CYBRD1    |
| 1.78584E-06 | stable | WBSCR18   |
| 1.8467E-06  | stable | TBC1D15   |
| 1.86788E-06 | up     | LOC147804 |
| 1.88419E-06 | stable | TTC30A    |
| 1.90163E-06 | stable | POPDC2    |



## DEG.infomation

|             |        |           |
|-------------|--------|-----------|
| 1.90236E-06 | stable | SRGAP3    |
| 1.9042E-06  | stable | STRA13    |
| 1.92411E-06 | stable | LOC641705 |
| 1.95463E-06 | stable | MANBA     |
| 1.95505E-06 | stable | HSPC171   |
| 1.96114E-06 | stable | CARHSP1   |
| 1.96866E-06 | stable | SSR2      |
| 1.98647E-06 | down   | HIPK2     |
| 1.99526E-06 | stable | MRGPRF    |
| 2.02156E-06 | stable | NCKAP1L   |
| 2.02956E-06 | stable | MRPS33    |
| 2.03379E-06 | stable | PODN      |
| 2.04945E-06 | stable | IER5      |
| 2.05881E-06 | stable | GAB3      |
| 2.06232E-06 | stable | ASB15     |
| 2.07297E-06 | stable | SPAG11A   |
| 2.07975E-06 | stable | EP400     |
| 2.09043E-06 | stable | HIST1H4C  |
| 2.09498E-06 | stable | C17ORF90  |
| 2.0969E-06  | stable | DDX24     |
| 2.09758E-06 | stable | EEF2K     |
| 2.09796E-06 | stable | APLP1     |
| 2.09959E-06 | stable | ARMCX3    |
| 2.11917E-06 | stable | IFT172    |
| 2.13242E-06 | stable | TCFL5     |
| 2.151E-06   | stable | MAD2L1    |
| 2.15604E-06 | stable | DCUN1D5   |
| 2.15705E-06 | stable | NXNL1     |
| 2.15962E-06 | stable | P2RX5     |
| 2.16466E-06 | stable | CLPTM1L   |
| 2.17214E-06 | stable | ZNF827    |
| 2.20088E-06 | stable | LZIC      |
| 2.20292E-06 | stable | NBN       |
| 2.22289E-06 | stable | C1ORF35   |
| 2.2277E-06  | stable | SNORA33   |
| 2.23584E-06 | stable | SHMT1     |
| 2.23584E-06 | stable | POMT1     |
| 2.24133E-06 | stable | AFAP1L1   |
| 2.2513E-06  | stable | SMCR7L    |
| 2.26143E-06 | stable | WDR45     |
| 2.27176E-06 | stable | MPHOSPH10 |
| 2.28296E-06 | stable | DTX3      |
| 2.28751E-06 | stable | ENPP5     |
| 2.29166E-06 | stable | IL32      |
| 2.29854E-06 | stable | FAM134B   |
| 2.31543E-06 | stable | FAM100A   |
| 2.33376E-06 | stable | FUT4      |
| 2.34006E-06 | stable | PGA3      |
| 2.35022E-06 | stable | C9ORF102  |
| 2.41865E-06 | stable | ZNF704    |
| 2.42178E-06 | stable | ACTR6     |

DEG.infomation

|             |        |           |
|-------------|--------|-----------|
| 2.42762E-06 | stable | CCDC53    |
| 2.45878E-06 | stable | CD38      |
| 2.45975E-06 | stable | ARHGAP19  |
| 2.45989E-06 | stable | C17ORF87  |
| 2.47576E-06 | stable | CFB       |
| 2.47691E-06 | stable | C2ORF76   |
| 2.4772E-06  | stable | MAP2      |
| 2.4819E-06  | stable | ZFP30     |
| 2.48844E-06 | stable | PDIA5     |
| 2.50997E-06 | stable | RAMP3     |
| 2.5201E-06  | stable | PHC1      |
| 2.5201E-06  | stable | MRPL49    |
| 2.52028E-06 | stable | USP48     |
| 2.52375E-06 | stable | SGSM1     |
| 2.53288E-06 | stable | LOC441268 |
| 2.54101E-06 | stable | PCBD2     |
| 2.54442E-06 | stable | WDR5      |
| 2.59912E-06 | stable | NSF       |
| 2.59985E-06 | stable | C18ORF10  |
| 2.60161E-06 | stable | PDHB      |
| 2.62941E-06 | stable | TCTEX1D1  |
| 2.65555E-06 | stable | SEC31A    |
| 2.65629E-06 | stable | QTRT1     |
| 2.67945E-06 | stable | USP28     |
| 2.68407E-06 | stable | PTPN14    |
| 2.68937E-06 | stable | ADAT3     |
| 2.69851E-06 | stable | PARVA     |
| 2.69986E-06 | down   | TFRC      |
| 2.71004E-06 | stable | FBXL14    |
| 2.72247E-06 | stable | ATF6      |
| 2.7361E-06  | stable | NOPE      |
| 2.74356E-06 | stable | ADCK2     |
| 2.75741E-06 | stable | PRMT1     |
| 2.75741E-06 | stable | WWC2      |
| 2.77879E-06 | stable | GPS2      |
| 2.77879E-06 | stable | PER1      |
| 2.785E-06   | stable | ADD1      |
| 2.7871E-06  | stable | MGA       |
| 2.7871E-06  | stable | BZRAP1    |
| 2.79077E-06 | stable | C17ORF80  |
| 2.79077E-06 | stable | PPP1R10   |
| 2.79077E-06 | stable | CRY2      |
| 2.79649E-06 | stable | ADRA1B    |
| 2.79783E-06 | stable | CMTM3     |
| 2.81596E-06 | stable | NEBL      |
| 2.81636E-06 | stable | GNG11     |
| 2.82624E-06 | stable | PARP11    |
| 2.82675E-06 | stable | NUB1      |
| 2.83398E-06 | stable | TNFSF13B  |
| 2.84129E-06 | stable | CHRAC1    |
| 2.84234E-06 | stable | ADH5      |

## DEG.infomation

|             |        |           |
|-------------|--------|-----------|
| 2.84805E-06 | stable | DBI       |
| 2.85905E-06 | stable | ACAD11    |
| 2.87475E-06 | stable | GOLPH4    |
| 2.87954E-06 | stable | FAM48A    |
| 2.88648E-06 | stable | LOC57228  |
| 2.8889E-06  | stable | APEX1     |
| 2.89893E-06 | stable | ELK1      |
| 2.90274E-06 | stable | LOC653566 |
| 2.93994E-06 | stable | GIMAP5    |
| 2.94663E-06 | stable | GAP43     |
| 2.96974E-06 | stable | NENF      |
| 2.98206E-06 | stable | RBP1      |
| 2.98244E-06 | stable | LOC731878 |
| 2.99879E-06 | stable | SH3PXD2A  |
| 2.99879E-06 | stable | ANO5      |
| 3.00142E-06 | stable | SLC4A4    |
| 3.00432E-06 | stable | CHN2      |
| 3.0221E-06  | stable | TIGD7     |
| 3.05544E-06 | stable | SEPT5     |
| 3.05544E-06 | stable | RBM4B     |
| 3.05544E-06 | stable | CHST14    |
| 3.0982E-06  | stable | C9ORF103  |
| 3.11752E-06 | stable | TPRG1L    |
| 3.13745E-06 | stable | RABL3     |
| 3.14052E-06 | stable | BTD       |
| 3.17104E-06 | stable | PLAC9     |
| 3.17519E-06 | stable | LOC644590 |
| 3.1765E-06  | stable | RAI1      |
| 3.19497E-06 | stable | SLC25A1   |
| 3.19721E-06 | stable | WDR34     |
| 3.20068E-06 | stable | STK10     |
| 3.21469E-06 | stable | FOXO3     |
| 3.21469E-06 | stable | CCNL1     |
| 3.23969E-06 | stable | FNBP1     |
| 3.26454E-06 | stable | C18ORF22  |
| 3.27463E-06 | stable | GNAI2     |
| 3.29384E-06 | stable | CDC7      |
| 3.2947E-06  | stable | FXYD1     |
| 3.29537E-06 | stable | C6ORF48   |
| 3.30218E-06 | stable | ZNF667    |
| 3.325E-06   | stable | MAD1L1    |
| 3.33082E-06 | stable | TRQ1      |
| 3.47885E-06 | stable | DDX42     |
| 3.49762E-06 | stable | EIF3I     |
| 3.51151E-06 | stable | HSD17B14  |
| 3.53436E-06 | stable | PPP1CB    |
| 3.55685E-06 | stable | HDCC2     |
| 3.55685E-06 | stable | NSMCE4A   |
| 3.58181E-06 | stable | CTSL1     |
| 3.59538E-06 | stable | TAX1BP1   |
| 3.61046E-06 | stable | SRD5A2L2  |

## DEG.infomation

|             |        |           |
|-------------|--------|-----------|
| 3.61934E-06 | stable | PIGW      |
| 3.6285E-06  | stable | SEPT8     |
| 3.6384E-06  | stable | IFI35     |
| 3.6611E-06  | stable | TACC1     |
| 3.67202E-06 | stable | CXORF23   |
| 3.68139E-06 | stable | DOCK9     |
| 3.70191E-06 | stable | TWSG1     |
| 3.70262E-06 | stable | CHAC2     |
| 3.7212E-06  | stable | CORO7     |
| 3.75391E-06 | stable | CALB2     |
| 3.76241E-06 | stable | ZNF439    |
| 3.77364E-06 | stable | C1ORF149  |
| 3.77601E-06 | stable | ZBTB43    |
| 3.77947E-06 | stable | SYT17     |
| 3.80021E-06 | stable | EGLN1     |
| 3.81544E-06 | stable | SNRK      |
| 3.81839E-06 | stable | MESP1     |
| 3.86929E-06 | stable | CCL19     |
| 3.87613E-06 | stable | WBSCR22   |
| 3.87716E-06 | stable | TMEM9     |
| 3.87716E-06 | stable | PSAP      |
| 3.87827E-06 | stable | CAMP      |
| 3.88864E-06 | stable | HIRIP3    |
| 3.93608E-06 | stable | VASH2     |
| 3.95448E-06 | stable | EPN2      |
| 4.0032E-06  | stable | LSM12     |
| 4.0262E-06  | stable | KIAA1754  |
| 4.03432E-06 | stable | C1ORF74   |
| 4.04564E-06 | stable | SHISA3    |
| 4.04639E-06 | stable | RAD21     |
| 4.05753E-06 | stable | LAMC2     |
| 4.06122E-06 | stable | IRF2BP2   |
| 4.08564E-06 | stable | LOC151579 |
| 4.11768E-06 | stable | ZDHHC16   |
| 4.13221E-06 | stable | C16ORF79  |
| 4.14008E-06 | stable | CLDN15    |
| 4.18022E-06 | stable | MEOX2     |
| 4.20004E-06 | stable | PAQR4     |
| 4.21107E-06 | stable | PHF1      |
| 4.23535E-06 | stable | RTN1      |
| 4.24268E-06 | stable | MUTED     |
| 4.24556E-06 | stable | YAF2      |
| 4.26454E-06 | stable | ZNF226    |
| 4.29519E-06 | stable | C11ORF75  |
| 4.29776E-06 | stable | PRPF19    |
| 4.30708E-06 | stable | HEXB      |
| 4.32471E-06 | stable | TMEM18    |
| 4.33613E-06 | stable | JUB       |
| 4.34632E-06 | stable | ARG2      |
| 4.35563E-06 | stable | LOC728411 |
| 4.38165E-06 | stable | CYP46A1   |

## DEG.infomation

|             |        |           |
|-------------|--------|-----------|
| 4.38175E-06 | stable | ITGAE     |
| 4.40832E-06 | stable | LOC652624 |
| 4.41247E-06 | stable | SIAH2     |
| 4.42969E-06 | stable | SECISBP2  |
| 4.44813E-06 | stable | PTGFRN    |
| 4.46325E-06 | stable | TMEM120B  |
| 4.47956E-06 | stable | EIF3A     |
| 4.4929E-06  | stable | C22ORF13  |
| 4.51446E-06 | stable | C11ORF52  |
| 4.52155E-06 | stable | C2ORF30   |
| 4.53863E-06 | stable | CEP63     |
| 4.54563E-06 | stable | NID1      |
| 4.54766E-06 | stable | ECE1      |
| 4.60598E-06 | stable | HSPA12A   |
| 4.61078E-06 | stable | IL12A     |
| 4.61601E-06 | stable | CDC42SE1  |
| 4.62164E-06 | stable | TRA2A     |
| 4.62829E-06 | stable | DUSP2     |
| 4.64614E-06 | stable | E2F3      |
| 4.66207E-06 | stable | FLJ39827  |
| 4.67238E-06 | stable | OXR1      |
| 4.67276E-06 | stable | RPSA      |
| 4.67435E-06 | stable | UNC93B1   |
| 4.68377E-06 | stable | EVI5L     |
| 4.68377E-06 | stable | C6ORF108  |
| 4.70952E-06 | stable | SRPK3     |
| 4.71635E-06 | stable | PLCXD1    |
| 4.71813E-06 | stable | IRAK1BP1  |
| 4.71972E-06 | stable | ADIPOR2   |
| 4.72723E-06 | stable | PPAT      |
| 4.73258E-06 | stable | ZNF408    |
| 4.74579E-06 | stable | KLHL7     |
| 4.75791E-06 | stable | CAMLG     |
| 4.78208E-06 | stable | SNRPC     |
| 4.81043E-06 | stable | UBIAD1    |
| 4.81515E-06 | stable | SNAPC2    |
| 4.81738E-06 | stable | ANKRD39   |
| 4.82475E-06 | stable | APEG1     |
| 4.83931E-06 | stable | ZNF484    |
| 4.86131E-06 | stable | ANGPTL1   |
| 4.87536E-06 | stable | EZH1      |
| 4.89221E-06 | stable | RBBP6     |
| 4.90036E-06 | stable | MNAT1     |
| 4.91595E-06 | stable | SLIT2     |
| 4.93206E-06 | stable | NRIP1     |
| 4.93753E-06 | stable | CKAP5     |
| 4.95113E-06 | stable | HSD3B7    |
| 4.95113E-06 | stable | SCARB2    |
| 4.95113E-06 | stable | EPHX2     |
| 4.96285E-06 | stable | C7ORF49   |
| 4.96875E-06 | stable | GNA13     |

## DEG.infomation

|             |        |                |
|-------------|--------|----------------|
| 5.00079E-06 | stable | C21ORF70       |
| 5.04698E-06 | stable | VPS33B         |
| 5.07872E-06 | stable | ZNF254         |
| 5.08783E-06 | stable | TDG            |
| 5.10115E-06 | stable | SLC39A8        |
| 5.10245E-06 | stable | AGFG2          |
| 5.10245E-06 | stable | NELF           |
| 5.10245E-06 | stable | TRAPPC3        |
| 5.12205E-06 | stable | ADCK5          |
| 5.17107E-06 | stable | CHGB           |
| 5.19629E-06 | stable | PCF11          |
| 5.19629E-06 | stable | TRPC4AP        |
| 5.19629E-06 | stable | POLR3B         |
| 5.26407E-06 | stable | ADSS           |
| 5.26645E-06 | stable | NAB1           |
| 5.27488E-06 | stable | KIAA0649       |
| 5.31714E-06 | stable | LSAMP          |
| 5.39551E-06 | stable | CHFR           |
| 5.41217E-06 | stable | SLC46A3        |
| 5.45043E-06 | stable | STAG2          |
| 5.48605E-06 | stable | FLJ12684       |
| 5.55518E-06 | stable | SCGN           |
| 5.58449E-06 | stable | DHX9           |
| 5.59E-06    | stable | RBM41          |
| 5.63699E-06 | stable | PDLIM1         |
| 5.66223E-06 | stable | E2F5           |
| 5.66223E-06 | stable | CAPRIN2        |
| 5.66223E-06 | stable | NOTCH1         |
| 5.66223E-06 | stable | IKBKAP         |
| 5.66427E-06 | stable | ATP5L          |
| 5.69537E-06 | stable | EBNA1BP2       |
| 5.69537E-06 | stable | ERF            |
| 5.70136E-06 | stable | MYBPHL         |
| 5.74054E-06 | stable | C19ORF42       |
| 5.74991E-06 | stable | GPN2           |
| 5.77451E-06 | stable | TMEM189-UBE2V1 |
| 5.79375E-06 | stable | CBLB           |
| 5.81226E-06 | stable | C21ORF2        |
| 5.81726E-06 | stable | TXNDC4         |
| 5.82655E-06 | stable | C20ORF149      |
| 5.88652E-06 | stable | MCCC1          |
| 5.93183E-06 | stable | FGFR1OP        |
| 5.94888E-06 | stable | RUNX3          |
| 5.98209E-06 | stable | ZNF256         |
| 5.99179E-06 | stable | PDGFD          |
| 5.99386E-06 | stable | METTL5         |
| 6.03407E-06 | stable | SH3RF2         |
| 6.05745E-06 | stable | EDF1           |
| 6.0816E-06  | stable | C10ORF137      |
| 6.10773E-06 | stable | FRY            |
| 6.11764E-06 | stable | BRP44          |

## DEG.infomation

|             |        |           |
|-------------|--------|-----------|
| 6.14083E-06 | stable | TNFAIP1   |
| 6.18147E-06 | stable | ATP5S     |
| 6.22969E-06 | stable | TMCC1     |
| 6.25784E-06 | stable | FLJ41603  |
| 6.25784E-06 | up     | FGF18     |
| 6.25784E-06 | stable | VCP       |
| 6.27118E-06 | stable | GABBR2    |
| 6.27118E-06 | stable | METAP2    |
| 6.27278E-06 | stable | CPD       |
| 6.29154E-06 | stable | ZFHX3     |
| 6.35298E-06 | stable | LOC653972 |
| 6.36559E-06 | down   | XIRP1     |
| 6.39564E-06 | stable | C21ORF59  |
| 6.43544E-06 | stable | GLUL      |
| 6.47919E-06 | stable | PRELID1   |
| 6.48297E-06 | stable | UHRF1     |
| 6.5282E-06  | stable | RASSF5    |
| 6.62112E-06 | stable | PDLIM5    |
| 6.65679E-06 | stable | HVCN1     |
| 6.66646E-06 | stable | SLC9A4    |
| 6.7227E-06  | stable | NAT9      |
| 6.76332E-06 | stable | HDHD3     |
| 6.76932E-06 | stable | ZNF287    |
| 6.78083E-06 | stable | PRRG2     |
| 6.78747E-06 | stable | UNC84A    |
| 6.79635E-06 | stable | SNRPF     |
| 6.82146E-06 | stable | SRA1      |
| 6.82146E-06 | stable | RNF170    |
| 6.86418E-06 | stable | HLA-E     |
| 6.87166E-06 | stable | C20ORF103 |
| 6.89288E-06 | stable | KCNK3     |
| 6.89924E-06 | stable | C12ORF57  |
| 7.00976E-06 | stable | LOC653994 |
| 7.0149E-06  | stable | SH3GLB1   |
| 7.0454E-06  | stable | FLJ22167  |
| 7.04803E-06 | stable | RPL39L    |
| 7.04983E-06 | stable | GBA       |
| 7.11155E-06 | stable | GADL1     |
| 7.11832E-06 | stable | VPS24     |
| 7.15535E-06 | stable | NPHP3     |
| 7.20633E-06 | stable | ZNF613    |
| 7.23385E-06 | stable | FKBP3     |
| 7.25518E-06 | stable | LOC646463 |
| 7.27557E-06 | stable | PARVB     |
| 7.35468E-06 | stable | SGCA      |
| 7.39004E-06 | stable | CD47      |
| 7.52284E-06 | stable | MAF       |
| 7.52371E-06 | stable | DMKN      |
| 7.52848E-06 | stable | SUMO3     |
| 7.54599E-06 | stable | SAMD4A    |
| 7.59958E-06 | stable | SNX21     |

## DEG.infomation

|             |        |            |
|-------------|--------|------------|
| 7.59958E-06 | stable | TOMM34     |
| 7.61114E-06 | stable | RNF125     |
| 7.64527E-06 | stable | PPP6C      |
| 7.67238E-06 | stable | NME1-NME2  |
| 7.68774E-06 | stable | ASGR2      |
| 7.70908E-06 | stable | SNORA10    |
| 7.72808E-06 | stable | C6ORF57    |
| 7.75177E-06 | stable | CXXC5      |
| 7.75177E-06 | stable | ANAPC13    |
| 7.75177E-06 | stable | RWDD4A     |
| 7.75177E-06 | stable | TFB1M      |
| 7.84694E-06 | stable | E2F2       |
| 7.86599E-06 | stable | DHFRL1     |
| 7.86815E-06 | stable | IL27RA     |
| 7.91938E-06 | stable | NR2F6      |
| 7.92682E-06 | stable | ZFAND6     |
| 7.96068E-06 | stable | ZCCHC3     |
| 7.96952E-06 | stable | LETM1      |
| 7.98427E-06 | stable | MGC12965   |
| 7.98427E-06 | stable | C18ORF51   |
| 8.01539E-06 | stable | TUSC4      |
| 8.04513E-06 | stable | AURKA      |
| 8.07174E-06 | stable | RAB11FIP3  |
| 8.11619E-06 | stable | ZMYM2      |
| 8.15302E-06 | stable | U2AF1      |
| 8.155E-06   | stable | CCNB1IP1   |
| 8.19822E-06 | stable | GSN        |
| 8.28229E-06 | stable | NSMCE1     |
| 8.29802E-06 | stable | LOC647970  |
| 8.30856E-06 | stable | ACVRL1     |
| 8.32139E-06 | stable | THOC6      |
| 8.43116E-06 | stable | ZFYVE21    |
| 8.44848E-06 | stable | RCN3       |
| 8.59684E-06 | stable | SLC25A13   |
| 8.6084E-06  | stable | MMP28      |
| 8.64594E-06 | stable | MLSTD1     |
| 8.6857E-06  | stable | SNORA70    |
| 8.6857E-06  | stable | CCNI       |
| 8.69299E-06 | stable | MAP2K1IP1  |
| 8.69402E-06 | up     | PENK       |
| 8.72397E-06 | stable | SRRM1      |
| 8.7283E-06  | stable | GABPA      |
| 8.74367E-06 | stable | STEAP1     |
| 8.75417E-06 | stable | FLJ39653   |
| 8.75671E-06 | stable | HRIHFB2122 |
| 8.7651E-06  | stable | RPL3L      |
| 8.77816E-06 | stable | LOC729101  |
| 8.85969E-06 | stable | ZNF365     |
| 8.91784E-06 | stable | SNRP70     |
| 8.93357E-06 | down   | SLCO2A1    |
| 8.94752E-06 | stable | TMEM67     |



DEG.infomation

|             |        |           |
|-------------|--------|-----------|
| 8.97062E-06 | stable | LAT1-3TM  |
| 8.97986E-06 | stable | RNF130    |
| 8.98683E-06 | stable | LOC644743 |
| 9.02033E-06 | stable | AP1M1     |
| 9.12554E-06 | stable | KHSRP     |
| 9.12554E-06 | stable | EI24      |
| 9.1618E-06  | stable | RBM12B    |
| 9.22309E-06 | stable | C19ORF18  |
| 9.26677E-06 | stable | PDE2A     |
| 9.27134E-06 | stable | KIAA0564  |
| 9.36542E-06 | stable | LOC339344 |
| 9.39746E-06 | stable | TMEM47    |
| 9.4276E-06  | stable | LRRC10    |
| 9.44002E-06 | stable | NECAB3    |
| 9.45618E-06 | stable | FOXC1     |
| 9.46578E-06 | stable | LOC285929 |
| 9.50039E-06 | stable | UBE2J2    |
| 9.5088E-06  | stable | CETN3     |
| 9.57403E-06 | stable | SLC22A18  |
| 9.63019E-06 | stable | ZNF181    |
| 9.65104E-06 | stable | TMEM183A  |
| 9.65695E-06 | stable | FAM167B   |
| 9.69604E-06 | stable | DNAJA4    |
| 9.79157E-06 | stable | ARMCX1    |
| 9.82353E-06 | stable | LOC643446 |
| 9.82394E-06 | stable | NGLY1     |
| 9.83559E-06 | stable | C18ORF1   |
| 9.94942E-06 | stable | STAG3L2   |
| 1.00398E-05 | stable | FOLR3     |
| 1.00487E-05 | stable | FAM104B   |
| 1.00522E-05 | stable | CLEC1A    |
| 1.01079E-05 | stable | RBBP7     |
| 1.01192E-05 | stable | C1ORF225  |
| 1.01542E-05 | stable | LOC401019 |
| 1.02106E-05 | stable | OPA3      |
| 1.02214E-05 | stable | ALDH1A2   |
| 1.02582E-05 | stable | PLAGL1    |
| 1.0286E-05  | stable | IVD       |
| 1.03357E-05 | stable | FIS       |
| 1.03932E-05 | stable | PLCB2     |
| 1.03935E-05 | stable | KIAA0196  |
| 1.0431E-05  | stable | EGFL7     |
| 1.0431E-05  | stable | HIST1H4H  |
| 1.05485E-05 | stable | SUOX      |
| 1.05608E-05 | stable | TIAM2     |
| 1.07053E-05 | stable | ZNF703    |
| 1.07053E-05 | stable | CDC123    |
| 1.07053E-05 | stable | RRAGD     |
| 1.07232E-05 | stable | FBXO9     |
| 1.07355E-05 | stable | FAP       |
| 1.07627E-05 | stable | DERL2     |

## DEG.infomation

|             |        |           |
|-------------|--------|-----------|
| 1.07683E-05 | stable | DECR2     |
| 1.07683E-05 | stable | ZNF18     |
| 1.07886E-05 | stable | KIAA0528  |
| 1.08221E-05 | stable | BMP2      |
| 1.08816E-05 | stable | CAV1      |
| 1.08889E-05 | stable | TMEM80    |
| 1.09718E-05 | stable | NUPR1     |
| 1.09718E-05 | stable | C9ORF123  |
| 1.09846E-05 | stable | LOC389203 |
| 1.10176E-05 | stable | ORMDL3    |
| 1.10215E-05 | stable | EIF4E3    |
| 1.10517E-05 | stable | RAB9A     |
| 1.10887E-05 | stable | IPO4      |
| 1.10887E-05 | stable | CBFA2T2   |
| 1.10887E-05 | stable | BBS12     |
| 1.11059E-05 | stable | PLXNB1    |
| 1.11498E-05 | stable | HIG2      |
| 1.11552E-05 | stable | PCDH18    |
| 1.12191E-05 | stable | ANXA2P3   |
| 1.125E-05   | stable | FAM45A    |
| 1.12865E-05 | stable | SMC4      |
| 1.12996E-05 | stable | HPS1      |
| 1.1359E-05  | stable | PIGZ      |
| 1.14088E-05 | stable | MGAT4A    |
| 1.14226E-05 | stable | PELP1     |
| 1.15559E-05 | stable | GARS      |
| 1.16405E-05 | stable | OSM       |
| 1.1667E-05  | stable | C11ORF45  |
| 1.1667E-05  | stable | TTC33     |
| 1.17315E-05 | stable | C11ORF38  |
| 1.17811E-05 | stable | RAB40B    |
| 1.18033E-05 | stable | CDH23     |
| 1.18802E-05 | stable | COQ3      |
| 1.19463E-05 | stable | CCR2      |
| 1.19616E-05 | stable | TMEM183B  |
| 1.19896E-05 | stable | COG6      |
| 1.20218E-05 | stable | LEMD2     |
| 1.20899E-05 | stable | SKP2      |
| 1.21833E-05 | stable | PACSIN3   |
| 1.23551E-05 | stable | PDS5A     |
| 1.2465E-05  | stable | AGTPBP1   |
| 1.248E-05   | stable | UQCRQ     |
| 1.25026E-05 | stable | CCDC32    |
| 1.25135E-05 | stable | FBXO30    |
| 1.25135E-05 | stable | HEATR2    |
| 1.25256E-05 | stable | PIGO      |
| 1.25384E-05 | stable | KIAA1244  |
| 1.26136E-05 | stable | KIAA1267  |
| 1.26957E-05 | stable | PIAS4     |
| 1.28322E-05 | stable | BMF       |
| 1.28844E-05 | stable | WDR13     |

## DEG.infomation

|             |        |           |
|-------------|--------|-----------|
| 1.28975E-05 | stable | SRPR      |
| 1.30092E-05 | stable | SUPT3H    |
| 1.30119E-05 | stable | PLD3      |
| 1.30919E-05 | stable | ELK4      |
| 1.30993E-05 | stable | POLR2D    |
| 1.31688E-05 | stable | ZNF561    |
| 1.31798E-05 | stable | CFI       |
| 1.32129E-05 | stable | UBAC1     |
| 1.32341E-05 | stable | PMVK      |
| 1.33267E-05 | stable | TCEB3     |
| 1.3375E-05  | stable | LTB4R     |
| 1.34403E-05 | stable | PTGDS     |
| 1.34584E-05 | stable | TPMT      |
| 1.35161E-05 | stable | SNX10     |
| 1.35616E-05 | stable | F2RL2     |
| 1.36144E-05 | stable | CD300LG   |
| 1.36969E-05 | stable | UBE2O     |
| 1.36969E-05 | stable | CCBL1     |
| 1.37419E-05 | stable | RPLP0     |
| 1.38578E-05 | stable | ZSWIM6    |
| 1.39144E-05 | stable | AXIN1     |
| 1.39431E-05 | stable | KIAA1107  |
| 1.40297E-05 | stable | TJAP1     |
| 1.4044E-05  | stable | DHTKD1    |
| 1.40962E-05 | stable | AMY2B     |
| 1.42258E-05 | stable | POLB      |
| 1.42311E-05 | stable | ZFP161    |
| 1.42575E-05 | stable | BOLA1     |
| 1.43535E-05 | stable | C20ORF43  |
| 1.43971E-05 | stable | SHE       |
| 1.44283E-05 | stable | TRAPPC2L  |
| 1.46086E-05 | stable | C2        |
| 1.46691E-05 | stable | LRRC51    |
| 1.46691E-05 | stable | RAB38     |
| 1.47635E-05 | stable | RIC8A     |
| 1.47691E-05 | stable | CNBP      |
| 1.47969E-05 | stable | TMEM159   |
| 1.48164E-05 | stable | CKAP4     |
| 1.48583E-05 | stable | SETBP1    |
| 1.49998E-05 | stable | C10ORF67  |
| 1.5003E-05  | stable | KIAA1271  |
| 1.5003E-05  | stable | ILF3      |
| 1.50657E-05 | stable | TLR4      |
| 1.50757E-05 | stable | WDR45L    |
| 1.50937E-05 | stable | EHD3      |
| 1.50937E-05 | stable | C16ORF72  |
| 1.51398E-05 | stable | CRYBG3    |
| 1.52045E-05 | stable | C15ORF40  |
| 1.52681E-05 | stable | ARNT2     |
| 1.52947E-05 | stable | LOC641825 |
| 1.53084E-05 | stable | KCNIP3    |

DEG.infomation

|             |        |           |
|-------------|--------|-----------|
| 1.53718E-05 | stable | PH-4      |
| 1.5455E-05  | stable | ZNF507    |
| 1.54727E-05 | stable | HSF4      |
| 1.54926E-05 | stable | ANK1      |
| 1.56168E-05 | stable | DAB2      |
| 1.5676E-05  | stable | ABCB7     |
| 1.56987E-05 | stable | AQP4      |
| 1.59235E-05 | stable | AKAP8L    |
| 1.59694E-05 | stable | OSAP      |
| 1.60523E-05 | stable | PSMB9     |
| 1.61338E-05 | stable | SLC16A14  |
| 1.62529E-05 | stable | EFTUD2    |
| 1.62696E-05 | stable | MSRB2     |
| 1.6299E-05  | stable | SLC41A3   |
| 1.63438E-05 | stable | FARP1     |
| 1.63476E-05 | stable | C15ORF59  |
| 1.64042E-05 | stable | FAM81A    |
| 1.64323E-05 | stable | ESD       |
| 1.64323E-05 | stable | CEP290    |
| 1.65088E-05 | stable | CPE       |
| 1.6528E-05  | stable | KLRG1     |
| 1.65737E-05 | stable | TUBE1     |
| 1.67322E-05 | stable | HIC2      |
| 1.67551E-05 | stable | ELOVL5    |
| 1.67785E-05 | stable | GPR124    |
| 1.67802E-05 | stable | COQ6      |
| 1.69011E-05 | stable | LOC283174 |
| 1.69175E-05 | stable | CETP      |
| 1.69861E-05 | stable | LOC643293 |
| 1.70798E-05 | stable | CCDC51    |
| 1.70963E-05 | stable | FHIT      |
| 1.71317E-05 | stable | ITFG2     |
| 1.73294E-05 | stable | FAM155B   |
| 1.73735E-05 | stable | SMAP1     |
| 1.74147E-05 | stable | VGLL3     |
| 1.74147E-05 | stable | C16ORF87  |
| 1.74733E-05 | stable | RARRES3   |
| 1.76886E-05 | stable | WDR59     |
| 1.76886E-05 | stable | FBL       |
| 1.78026E-05 | stable | C2ORF18   |
| 1.79191E-05 | stable | HS3ST2    |
| 1.7952E-05  | stable | ESRRAP2   |
| 1.80711E-05 | stable | SETD3     |
| 1.81269E-05 | stable | ZNF234    |
| 1.81308E-05 | stable | SNRPA1    |
| 1.83474E-05 | stable | SNCAIP    |
| 1.83559E-05 | stable | ZDHHC15   |
| 1.83642E-05 | stable | ZNF491    |
| 1.83642E-05 | stable | ZER1      |
| 1.85031E-05 | stable | ZNF12     |
| 1.85271E-05 | stable | ZNF25     |

## DEG.infomation

|             |        |           |
|-------------|--------|-----------|
| 1.85628E-05 | stable | C11ORF71  |
| 1.86044E-05 | stable | EDN1      |
| 1.86679E-05 | stable | SLAIN1    |
| 1.87555E-05 | stable | C3ORF33   |
| 1.88094E-05 | stable | PTRH1     |
| 1.88094E-05 | stable | GNMT      |
| 1.88496E-05 | stable | MED23     |
| 1.89256E-05 | stable | LRRCC1    |
| 1.90167E-05 | stable | CD52      |
| 1.90167E-05 | stable | TSNAX     |
| 1.90179E-05 | stable | KCMF1     |
| 1.90499E-05 | stable | MYO9A     |
| 1.90675E-05 | stable | LOC645863 |
| 1.90732E-05 | stable | LOC440349 |
| 1.90985E-05 | stable | AGPAT9    |
| 1.91127E-05 | stable | KRCC1     |
| 1.91174E-05 | stable | CHKB      |
| 1.91876E-05 | stable | S100A4    |
| 1.92795E-05 | stable | PNPLA7    |
| 1.928E-05   | stable | HKR1      |
| 1.93627E-05 | stable | FAM57A    |
| 1.93867E-05 | stable | CEP57     |
| 1.94274E-05 | stable | CPNE3     |
| 1.9574E-05  | stable | A4GALT    |
| 1.96369E-05 | stable | RTN4R     |
| 1.97184E-05 | stable | BHMT2     |
| 1.9893E-05  | stable | DOCK10    |
| 1.99948E-05 | stable | LINGO4    |
| 2.00669E-05 | stable | GDF10     |
| 2.01874E-05 | stable | CHMP2A    |
| 2.02348E-05 | stable | KPNA4     |
| 2.02867E-05 | stable | KIAA1688  |
| 2.03428E-05 | stable | CCDC136   |
| 2.03661E-05 | stable | PEBP4     |
| 2.04878E-05 | stable | BBS1      |
| 2.06363E-05 | stable | DYRK3     |
| 2.08895E-05 | stable | TMEM177   |
| 2.10387E-05 | stable | STIL      |
| 2.10545E-05 | stable | MRPL1     |
| 2.11099E-05 | stable | LAMA4     |
| 2.11431E-05 | stable | ACBD5     |
| 2.12135E-05 | stable | CDCA2     |
| 2.12782E-05 | stable | LOC648057 |
| 2.13497E-05 | stable | GNRH1     |
| 2.13896E-05 | stable | SLC38A7   |
| 2.16189E-05 | stable | CIR       |
| 2.1679E-05  | stable | SH3BGR    |
| 2.174E-05   | stable | HIBCH     |
| 2.18431E-05 | stable | C18ORF8   |
| 2.19385E-05 | stable | MAT2B     |
| 2.22533E-05 | stable | TMUB2     |

## DEG.infomation

|             |        |           |
|-------------|--------|-----------|
| 2.23511E-05 | stable | RBBP9     |
| 2.2378E-05  | stable | SDC2      |
| 2.24868E-05 | stable | NPHP1     |
| 2.25021E-05 | stable | RNF24     |
| 2.25021E-05 | stable | GNPNAT1   |
| 2.25021E-05 | stable | SAMD13    |
| 2.25154E-05 | stable | YIPF1     |
| 2.25605E-05 | stable | TMEM198   |
| 2.25605E-05 | stable | UBTD2     |
| 2.26913E-05 | stable | FKBP14    |
| 2.27311E-05 | stable | DPF3      |
| 2.27363E-05 | stable | ZNF71     |
| 2.27744E-05 | stable | MRPL52    |
| 2.28487E-05 | stable | PLEKHA5   |
| 2.28497E-05 | stable | AKAP11    |
| 2.28599E-05 | stable | KIAA0152  |
| 2.3001E-05  | stable | SRPK1     |
| 2.30171E-05 | stable | EDIL3     |
| 2.30342E-05 | stable | LOC652545 |
| 2.30526E-05 | stable | LRRC8D    |
| 2.31126E-05 | stable | YIPF3     |
| 2.35161E-05 | stable | DBN1      |
| 2.39711E-05 | stable | HECW2     |
| 2.39728E-05 | stable | RIOK2     |
| 2.39862E-05 | stable | C14ORF2   |
| 2.41784E-05 | stable | LOC642299 |
| 2.43199E-05 | stable | FAM50B    |
| 2.44265E-05 | stable | LEPR      |
| 2.44896E-05 | stable | CRISPLD1  |
| 2.4562E-05  | stable | ZFYVE16   |
| 2.47207E-05 | stable | MAGED2    |
| 2.47947E-05 | stable | U2AF1L4   |
| 2.48333E-05 | stable | CHODL     |
| 2.50913E-05 | stable | MARCKSL1  |
| 2.51192E-05 | stable | SGPL1     |
| 2.51755E-05 | stable | C1S       |
| 2.53265E-05 | stable | FAM33A    |
| 2.53669E-05 | stable | SNAP23    |
| 2.54416E-05 | stable | EIF4A3    |
| 2.54987E-05 | stable | GNL3      |
| 2.56169E-05 | stable | KCNT2     |
| 2.56435E-05 | stable | MMP15     |
| 2.5754E-05  | stable | GOLGA4    |
| 2.58158E-05 | stable | NDRG2     |
| 2.58158E-05 | stable | GCNT3     |
| 2.58195E-05 | stable | RPAIN     |
| 2.65338E-05 | stable | LOC650695 |
| 2.65767E-05 | up     | THY1      |
| 2.66311E-05 | stable | LMNB1     |
| 2.6676E-05  | stable | CADPS2    |
| 2.67615E-05 | stable | BTRC      |

## DEG.infomation

|             |        |           |
|-------------|--------|-----------|
| 2.69848E-05 | stable | ANKRD23   |
| 2.7015E-05  | stable | PAWR      |
| 2.70783E-05 | stable | CRKL      |
| 2.71858E-05 | stable | CDC5L     |
| 2.71858E-05 | stable | C20ORF194 |
| 2.72066E-05 | stable | GTF3C3    |
| 2.72315E-05 | stable | C4ORF27   |
| 2.73599E-05 | stable | TGFB111   |
| 2.73599E-05 | stable | GPR162    |
| 2.75705E-05 | stable | ACVR2A    |
| 2.79033E-05 | stable | PPP2R3C   |
| 2.81635E-05 | stable | FOXK2     |
| 2.82521E-05 | stable | ELP4      |
| 2.82521E-05 | stable | PGLS      |
| 2.82521E-05 | stable | EP300     |
| 2.83217E-05 | stable | PLXNA3    |
| 2.83994E-05 | stable | WIP1      |
| 2.84392E-05 | stable | C11ORF54  |
| 2.87159E-05 | stable | GRB10     |
| 2.87159E-05 | stable | SNORD108  |
| 2.87499E-05 | stable | BCAM      |
| 2.87547E-05 | stable | PANK2     |
| 2.87783E-05 | stable | CLEC5A    |
| 2.88586E-05 | stable | ANXA1     |
| 2.89994E-05 | stable | ZNF462    |
| 2.90139E-05 | stable | LSM7      |
| 2.93278E-05 | stable | NMD3      |
| 2.94321E-05 | stable | MGC71993  |
| 2.95463E-05 | stable | PNMT      |
| 2.95848E-05 | stable | PLEKHG1   |
| 2.97056E-05 | stable | FABP3     |
| 2.97986E-05 | stable | TP53I13   |
| 2.99076E-05 | stable | TRIM32    |
| 2.99335E-05 | stable | TES       |
| 2.99637E-05 | stable | SLC25A16  |
| 3.00554E-05 | stable | RB1CC1    |
| 3.01125E-05 | stable | PDXP      |
| 3.01371E-05 | stable | MLH1      |
| 3.02145E-05 | stable | KIT       |
| 3.02588E-05 | stable | DVL3      |
| 3.026E-05   | stable | ZBTB7B    |
| 3.02696E-05 | stable | HINT2     |
| 3.03038E-05 | stable | FLJ39632  |
| 3.03251E-05 | stable | HNRNPU    |
| 3.03287E-05 | stable | CRSP9     |
| 3.03756E-05 | stable | HSP90B1   |
| 3.04478E-05 | stable | ZC3H6     |
| 3.08364E-05 | stable | LOC402176 |
| 3.08933E-05 | stable | MFSD7     |
| 3.10135E-05 | stable | LMAN2L    |
| 3.11741E-05 | stable | CAMK2G    |

DEG.infomation

|             |        |           |
|-------------|--------|-----------|
| 3.14072E-05 | stable | FDX1L     |
| 3.14807E-05 | stable | EIF5A     |
| 3.15837E-05 | stable | HAS3      |
| 3.15987E-05 | stable | TCEA1     |
| 3.17957E-05 | stable | ITSN1     |
| 3.20452E-05 | stable | PRKAA2    |
| 3.20835E-05 | stable | MTERF     |
| 3.20928E-05 | stable | SLC43A3   |
| 3.22051E-05 | stable | PKIA      |
| 3.22504E-05 | stable | DHX33     |
| 3.24112E-05 | stable | B3GAT3    |
| 3.24559E-05 | stable | SHROOM4   |
| 3.25126E-05 | stable | ATP11C    |
| 3.25199E-05 | stable | LOC144481 |
| 3.25991E-05 | stable | SHPRH     |
| 3.26042E-05 | stable | YOD1      |
| 3.28571E-05 | stable | RAPGEF3   |
| 3.28571E-05 | stable | PPP1R8    |
| 3.29754E-05 | stable | CYB561D2  |
| 3.29887E-05 | stable | DDX23     |
| 3.31156E-05 | stable | VTN       |
| 3.34313E-05 | stable | HDAC2     |
| 3.34532E-05 | stable | CORO1C    |
| 3.35265E-05 | stable | THAP1     |
| 3.3563E-05  | stable | FBXL20    |
| 3.36265E-05 | stable | NAP1L1    |
| 3.36584E-05 | stable | CHMP1B    |
| 3.37876E-05 | stable | HEXIM2    |
| 3.37876E-05 | stable | SELE      |
| 3.40023E-05 | stable | STBD1     |
| 3.43637E-05 | stable | ABCA5     |
| 3.4469E-05  | stable | IARS2     |
| 3.45365E-05 | stable | PCDHB15   |
| 3.48007E-05 | stable | C1ORF216  |
| 3.50255E-05 | stable | MTCP1     |
| 3.51726E-05 | stable | CCDC43    |
| 3.51968E-05 | stable | GNPTAB    |
| 3.52113E-05 | stable | C1QL1     |
| 3.53868E-05 | stable | BNIP3     |
| 3.55099E-05 | stable | LZTR1     |
| 3.5754E-05  | stable | PLEKHO1   |
| 3.59208E-05 | stable | BMP7      |
| 3.59756E-05 | stable | SPAG7     |
| 3.6137E-05  | down   | CYP1B1    |
| 3.61978E-05 | stable | NPEPL1    |
| 3.62684E-05 | stable | BMPR2     |
| 3.63011E-05 | stable | SPATA5L1  |
| 3.63175E-05 | stable | PSMB3     |
| 3.63519E-05 | stable | LOC642333 |
| 3.64004E-05 | stable | PSME2     |
| 3.64389E-05 | stable | OSR2      |



DEG.infomation

|             |        |           |
|-------------|--------|-----------|
| 3.64795E-05 | stable | RUNDC2A   |
| 3.65374E-05 | stable | AIG1      |
| 3.65374E-05 | stable | ADSSL1    |
| 3.67202E-05 | stable | PPP1R14A  |
| 3.68404E-05 | stable | REPS1     |
| 3.68404E-05 | stable | TMEM27    |
| 3.6897E-05  | stable | AHCY      |
| 3.69004E-05 | stable | C14ORF131 |
| 3.6982E-05  | stable | SRRP35    |
| 3.70493E-05 | stable | EVI2B     |
| 3.71453E-05 | stable | RPS6KA2   |
| 3.72049E-05 | stable | MYL5      |
| 3.72492E-05 | stable | SH2D5     |
| 3.72936E-05 | stable | SEPP1     |
| 3.72936E-05 | stable | CHUK      |
| 3.73939E-05 | stable | GPSM3     |
| 3.75348E-05 | stable | WDR67     |
| 3.7734E-05  | stable | SCG2      |
| 3.7844E-05  | stable | SEC14L2   |
| 3.80606E-05 | stable | APCDD1    |
| 3.81856E-05 | stable | SCRN2     |
| 3.83182E-05 | stable | TOR1AIP2  |
| 3.87115E-05 | stable | CNOT4     |
| 3.87559E-05 | stable | ATG5      |
| 3.87885E-05 | stable | PDGFC     |
| 3.87889E-05 | stable | C20ORF132 |
| 3.88061E-05 | stable | UBE1C     |
| 3.89187E-05 | stable | PPIL3     |
| 3.89432E-05 | stable | CXXC1     |
| 3.90714E-05 | stable | SCAPER    |
| 3.93744E-05 | stable | LOC645566 |
| 3.93801E-05 | stable | DVL2      |
| 3.94493E-05 | stable | GABRB3    |
| 3.96195E-05 | stable | U2AF1L2   |
| 3.9631E-05  | stable | ASS1      |
| 3.98724E-05 | stable | CEACAM3   |
| 3.98724E-05 | up     | POSTN     |
| 4.01137E-05 | stable | LPCAT4    |
| 4.02042E-05 | stable | HAND2     |
| 4.02572E-05 | stable | LOC644436 |
| 4.04492E-05 | stable | WDR55     |
| 4.04739E-05 | stable | STK33     |
| 4.08837E-05 | stable | STX4      |
| 4.10091E-05 | up     | APOE      |
| 4.10091E-05 | stable | SMARCB1   |
| 4.11802E-05 | stable | TTC13     |
| 4.13708E-05 | stable | PNPLA6    |
| 4.14931E-05 | stable | PTTG1     |
| 4.15521E-05 | stable | PTHLH     |
| 4.15628E-05 | down   | CNN1      |
| 4.161E-05   | stable | SIVA      |

DEG.infomation

|             |        |           |
|-------------|--------|-----------|
| 4.16439E-05 | stable | ACOT8     |
| 4.16465E-05 | stable | ANKRD26   |
| 4.16628E-05 | stable | RN7SK     |
| 4.16628E-05 | stable | BET1      |
| 4.16628E-05 | stable | EIF2A     |
| 4.17686E-05 | stable | TAX1BP3   |
| 4.20094E-05 | stable | USP10     |
| 4.23296E-05 | stable | KIAA0247  |
| 4.23296E-05 | stable | C18ORF21  |
| 4.2752E-05  | stable | GFM1      |
| 4.28154E-05 | stable | CASC4     |
| 4.28154E-05 | stable | HEYL      |
| 4.28154E-05 | stable | SNX11     |
| 4.28732E-05 | stable | BEX2      |
| 4.29588E-05 | stable | P4HA2     |
| 4.29988E-05 | stable | KCNMA1    |
| 4.30323E-05 | stable | PPP1R3E   |
| 4.30829E-05 | stable | LRRC47    |
| 4.31188E-05 | stable | LUZP1     |
| 4.31701E-05 | stable | C20ORF107 |
| 4.31847E-05 | stable | LOC642780 |
| 4.32778E-05 | stable | USP38     |
| 4.32778E-05 | stable | ZNF148    |
| 4.33333E-05 | stable | FLJ43663  |
| 4.37833E-05 | stable | ARPP-19   |
| 4.39817E-05 | stable | PFAAP5    |
| 4.41836E-05 | stable | MPDZ      |
| 4.46018E-05 | stable | SNUPN     |
| 4.46054E-05 | stable | FLJ21438  |
| 4.47324E-05 | stable | LOC642921 |
| 4.47679E-05 | stable | SDHAP3    |
| 4.50167E-05 | stable | ME2       |
| 4.50604E-05 | stable | LONP1     |
| 4.51686E-05 | stable | SDHD      |
| 4.52942E-05 | stable | C9ORF16   |
| 4.53347E-05 | stable | TPP2      |
| 4.53386E-05 | stable | HRH2      |
| 4.53651E-05 | stable | SLC25A20  |
| 4.57223E-05 | stable | CUX2      |
| 4.59103E-05 | stable | RING1     |
| 4.61268E-05 | stable | DHX35     |
| 4.62125E-05 | stable | PI4KB     |
| 4.62401E-05 | stable | PPP2R1B   |
| 4.64431E-05 | stable | GOT2      |
| 4.64431E-05 | stable | LOC647054 |
| 4.64431E-05 | stable | RASL12    |
| 4.68067E-05 | stable | ZNF425    |
| 4.68991E-05 | stable | LOC649604 |
| 4.6903E-05  | stable | CHCHD5    |
| 4.69588E-05 | stable | USP22     |
| 4.69738E-05 | stable | VWF       |

DEG.infomation

|             |        |               |
|-------------|--------|---------------|
| 4.6981E-05  | stable | HEBP2         |
| 4.70878E-05 | stable | C1ORF128      |
| 4.74087E-05 | stable | TAF1C         |
| 4.74984E-05 | stable | LOC339804     |
| 4.75254E-05 | stable | ANP32A        |
| 4.75279E-05 | stable | DHRS4L2       |
| 4.79985E-05 | stable | CDK5          |
| 4.82348E-05 | stable | PARP9         |
| 4.84418E-05 | stable | RBM5          |
| 4.84816E-05 | stable | YIPF4         |
| 4.85882E-05 | stable | GMDS          |
| 4.86885E-05 | stable | GATA6         |
| 4.86925E-05 | stable | RPGR          |
| 4.87063E-05 | stable | PPP1R11       |
| 4.88131E-05 | stable | TPPP3         |
| 4.88208E-05 | stable | UBTF          |
| 4.88621E-05 | stable | C3ORF15       |
| 4.90822E-05 | stable | PLEKHA6       |
| 4.91696E-05 | stable | NME5          |
| 4.92891E-05 | stable | ZFAND1        |
| 4.969E-05   | stable | GSPT1         |
| 5.01539E-05 | stable | DKFZP564O0523 |
| 5.02442E-05 | stable | ZSCAN4        |
| 5.02547E-05 | stable | SYNE2         |
| 5.0588E-05  | stable | ENSA          |
| 5.06757E-05 | stable | ATE1          |
| 5.12253E-05 | stable | WNT2B         |
| 5.12395E-05 | stable | GTF2B         |
| 5.13425E-05 | stable | TMEM182       |
| 5.13954E-05 | stable | LOC728635     |
| 5.15066E-05 | stable | ZNF517        |
| 5.15601E-05 | stable | TPPP          |
| 5.15601E-05 | stable | RBM26         |
| 5.17647E-05 | stable | ENPP2         |
| 5.17709E-05 | stable | ZFYVE26       |
| 5.17709E-05 | stable | MGC18216      |
| 5.18986E-05 | stable | LOC648249     |
| 5.18986E-05 | stable | CISD1         |
| 5.21191E-05 | stable | LOC651029     |
| 5.21977E-05 | stable | DKK3          |
| 5.21977E-05 | stable | MCM2          |
| 5.21977E-05 | stable | JPH1          |
| 5.25816E-05 | stable | CCDC131       |
| 5.26951E-05 | stable | AOAH          |
| 5.31068E-05 | stable | CNIH4         |
| 5.32613E-05 | stable | RIPK1         |
| 5.35644E-05 | stable | NUDC          |
| 5.38364E-05 | stable | FGL2          |
| 5.39028E-05 | stable | LZTFL1        |
| 5.39535E-05 | stable | KIAA0261      |
| 5.41481E-05 | stable | DYNC1LI1      |

DEG.infomation

|             |        |           |
|-------------|--------|-----------|
| 5.41971E-05 | stable | ACTR5     |
| 5.42234E-05 | stable | TPM2      |
| 5.45297E-05 | stable | LOC401238 |
| 5.46674E-05 | stable | ARMET     |
| 5.47517E-05 | stable | TRADD     |
| 5.47726E-05 | stable | RENBP     |
| 5.52769E-05 | stable | NPR2      |
| 5.53468E-05 | stable | TMEM62    |
| 5.56022E-05 | stable | GLRX2     |
| 5.5625E-05  | stable | AK3       |
| 5.5671E-05  | stable | ARGLU1    |
| 5.57018E-05 | stable | LOC653308 |
| 5.57904E-05 | stable | TEF       |
| 5.68065E-05 | stable | BBS9      |
| 5.69816E-05 | stable | SLC19A3   |
| 5.76488E-05 | stable | ENDOG     |
| 5.78018E-05 | stable | ANKRD32   |
| 5.78018E-05 | stable | C9ORF23   |
| 5.78283E-05 | stable | TSPAN4    |
| 5.80404E-05 | stable | LOC440093 |
| 5.82743E-05 | stable | MFHAS1    |
| 5.84495E-05 | stable | STMN1     |
| 5.84495E-05 | stable | CTBP2     |
| 5.84891E-05 | stable | ZBTB48    |
| 5.85214E-05 | stable | LOC643911 |
| 5.92365E-05 | stable | ARHGAP11A |
| 5.92365E-05 | stable | DIABLO    |
| 5.94169E-05 | stable | LEPRE1    |
| 5.96523E-05 | stable | NSUN3     |
| 5.97432E-05 | stable | PDXK      |
| 6.00128E-05 | stable | ASL       |
| 6.00458E-05 | stable | SNAPC3    |
| 6.00906E-05 | stable | AXIN2     |
| 6.06581E-05 | stable | PNN       |
| 6.11294E-05 | stable | SCARA5    |
| 6.16717E-05 | stable | ELOVL4    |
| 6.16821E-05 | stable | ZNF644    |
| 6.24173E-05 | stable | EPDR1     |
| 6.28154E-05 | stable | ERN1      |
| 6.3364E-05  | stable | CDC42BPB  |
| 6.36933E-05 | stable | PNO1      |
| 6.39018E-05 | stable | TNNC2     |
| 6.40622E-05 | stable | GLTSCR1   |
| 6.50315E-05 | stable | C11ORF48  |
| 6.50999E-05 | stable | LOC648605 |
| 6.50999E-05 | stable | SRM       |
| 6.53715E-05 | stable | HMG20A    |
| 6.55025E-05 | stable | DERL1     |
| 6.62617E-05 | stable | SIRT1     |
| 6.68386E-05 | stable | LOC644096 |
| 6.69125E-05 | stable | C4ORF14   |

## DEG.infomation

|             |        |           |
|-------------|--------|-----------|
| 6.69125E-05 | stable | ISCA1L    |
| 6.7757E-05  | stable | HOXD12    |
| 6.77813E-05 | stable | UBR1      |
| 6.81825E-05 | stable | RHOT2     |
| 6.83813E-05 | stable | CARD8     |
| 6.9213E-05  | stable | ELOVL6    |
| 6.95094E-05 | stable | CSF1      |
| 6.96062E-05 | stable | SCAMP3    |
| 6.96427E-05 | stable | NBEAL2    |
| 6.99609E-05 | stable | IL24      |
| 7.01765E-05 | stable | GPR64     |
| 7.04309E-05 | stable | C17ORF75  |
| 7.04563E-05 | stable | TRIOBP    |
| 7.06766E-05 | stable | TMEM70    |
| 7.07015E-05 | stable | MAP1LC3B  |
| 7.07015E-05 | stable | CDK2AP2   |
| 7.07348E-05 | stable | SLC39A14  |
| 7.08173E-05 | stable | ACADVL    |
| 7.17686E-05 | stable | LOC399888 |
| 7.19629E-05 | stable | UROD      |
| 7.26659E-05 | stable | ACSM3     |
| 7.32829E-05 | stable | ATP5G3    |
| 7.37849E-05 | stable | MAN2C1    |
| 7.39971E-05 | stable | COMMD3    |
| 7.41069E-05 | stable | DDX17     |
| 7.44346E-05 | stable | DHRS7B    |
| 7.46446E-05 | stable | C17ORF63  |
| 7.50944E-05 | stable | CXORF56   |
| 7.54045E-05 | stable | LOC642489 |
| 7.54715E-05 | stable | CCT2      |
| 7.58566E-05 | stable | OR8H3     |
| 7.60498E-05 | stable | ZBTB8OS   |
| 7.61399E-05 | stable | ATP6V0A2  |
| 7.61827E-05 | stable | HNRPC     |
| 7.6305E-05  | stable | YRDC      |
| 7.63524E-05 | down   | MYOT      |
| 7.65145E-05 | stable | CLEC4GP1  |
| 7.6581E-05  | stable | ZNF444    |
| 7.68324E-05 | stable | AKR1C2    |
| 7.6875E-05  | stable | HECTD3    |
| 7.71429E-05 | stable | ZNF529    |
| 7.73116E-05 | stable | HSPBAP1   |
| 7.73171E-05 | stable | CD74      |
| 7.73738E-05 | stable | SCARNA9   |
| 7.74901E-05 | stable | TTC17     |
| 7.79304E-05 | stable | TPO       |
| 7.82071E-05 | stable | PADI4     |
| 7.86818E-05 | stable | MST1      |
| 7.90897E-05 | stable | PIK3R4    |
| 7.91638E-05 | stable | PTTG2     |
| 7.92923E-05 | stable | ZNF451    |

DEG.infomation

|             |        |           |
|-------------|--------|-----------|
| 7.9973E-05  | stable | G6PC3     |
| 7.99993E-05 | stable | AP3D1     |
| 8.01238E-05 | stable | IDH2      |
| 8.01945E-05 | stable | AGT       |
| 8.03331E-05 | stable | MACF1     |
| 8.04765E-05 | stable | NEDD1     |
| 8.12579E-05 | stable | SLC27A1   |
| 8.15936E-05 | stable | BCL2L12   |
| 8.17468E-05 | stable | TPCN1     |
| 8.21063E-05 | stable | IRS2      |
| 8.21063E-05 | stable | PAQR6     |
| 8.21146E-05 | stable | MLXIPL    |
| 8.24219E-05 | stable | LOC440160 |
| 8.27742E-05 | stable | LOC387867 |
| 8.27742E-05 | stable | LOC650152 |
| 8.34361E-05 | stable | CDS2      |
| 8.36705E-05 | stable | CNPY3     |
| 8.38695E-05 | stable | IL3RA     |
| 8.41455E-05 | stable | TP53      |
| 8.44708E-05 | stable | SNORD36A  |
| 8.45426E-05 | stable | LRRFIP2   |
| 8.48872E-05 | stable | PTTG3     |
| 8.50473E-05 | stable | GHR       |
| 8.52216E-05 | stable | RASIP1    |
| 8.52944E-05 | stable | CCDC111   |
| 8.52944E-05 | stable | LOC729905 |
| 8.54913E-05 | stable | EPN1      |
| 8.55534E-05 | stable | C9ORF164  |
| 8.55534E-05 | stable | AGK       |
| 8.56301E-05 | stable | STK32B    |
| 8.57369E-05 | stable | TMEM57    |
| 8.6115E-05  | stable | NHP2L1    |
| 8.63259E-05 | stable | TAGLN     |
| 8.67473E-05 | stable | DOK7      |
| 8.70041E-05 | stable | SALL2     |
| 8.72267E-05 | stable | MRPL53    |
| 8.73639E-05 | stable | GRHPR     |
| 8.76637E-05 | stable | CEP120    |
| 8.77396E-05 | stable | PPM1F     |
| 8.80124E-05 | stable | LOC643720 |
| 8.8425E-05  | stable | HERC4     |
| 8.8609E-05  | stable | IIP45     |
| 8.86275E-05 | stable | IKBKE     |
| 8.90051E-05 | stable | SF3B4     |
| 8.95689E-05 | stable | SGCE      |
| 8.96583E-05 | stable | NME3      |
| 8.96583E-05 | stable | LOC727751 |
| 8.98198E-05 | stable | SLC27A6   |
| 8.99156E-05 | stable | AP1G1     |
| 8.99814E-05 | stable | MRCL3     |
| 9.00309E-05 | stable | TACC2     |

## DEG.infomation

|             |        |            |
|-------------|--------|------------|
| 9.06045E-05 | stable | CDKN2AIPNL |
| 9.06141E-05 | stable | PCDHB4     |
| 9.06991E-05 | stable | NTNG2      |
| 9.10111E-05 | stable | ABCA2      |
| 9.10111E-05 | stable | VAV1       |
| 9.11642E-05 | stable | DHRS12     |
| 9.17201E-05 | stable | SERINC2    |
| 9.22202E-05 | stable | PMS2       |
| 9.22202E-05 | stable | C16ORF63   |
| 9.22557E-05 | stable | GBP2       |
| 9.22941E-05 | stable | LOC645550  |
| 9.35956E-05 | stable | SPRY2      |
| 9.36625E-05 | stable | RANBP1     |
| 9.43548E-05 | stable | ABHD1      |
| 9.58204E-05 | stable | GALNT11    |
| 9.58999E-05 | stable | LOC652455  |
| 9.59339E-05 | stable | FAM171A1   |
| 9.70443E-05 | stable | CENPM      |
| 9.79452E-05 | stable | B9D2       |
| 9.81869E-05 | stable | C6ORF115   |
| 9.86004E-05 | stable | LOC389137  |
| 9.861E-05   | stable | SPHKAP     |
| 9.87736E-05 | stable | MEF2C      |
| 9.88911E-05 | stable | MEPCE      |
| 9.91151E-05 | stable | LOC647856  |
| 9.9146E-05  | stable | IFI27      |
| 9.94811E-05 | stable | LOC642267  |
| 9.99192E-05 | stable | ANKZF1     |
| 0.000100707 | stable | SLC20A1    |
| 0.000100999 | stable | GLYCTK     |
| 0.000102773 | stable | FJX1       |
| 0.00010397  | stable | UST        |
| 0.000104334 | stable | BAK1       |
| 0.000104383 | stable | FLJ20718   |
| 0.000104472 | stable | SMARCA5    |
| 0.000104527 | stable | ZKSCAN3    |
| 0.000105208 | stable | RNPC3      |
| 0.000105208 | stable | HRSP12     |
| 0.000105226 | stable | KLF9       |
| 0.000105692 | stable | COLEC11    |
| 0.000105736 | stable | FGF9       |
| 0.000105736 | stable | VHL        |
| 0.000105763 | stable | MICB       |
| 0.000105782 | stable | EVI1       |
| 0.000105869 | stable | DLAT       |
| 0.000105926 | stable | LOC651881  |
| 0.000106439 | stable | EIF2S3     |
| 0.000107435 | stable | UCHL3      |
| 0.00010764  | stable | GPBP1L1    |
| 0.00010764  | stable | DRD4       |
| 0.00010793  | stable | TRAPPC2    |

## DEG.infomation

|             |        |           |
|-------------|--------|-----------|
| 0.000108227 | stable | PLA1A     |
| 0.000108471 | stable | LOC654069 |
| 0.000108989 | stable | TLCD1     |
| 0.000109193 | stable | SLAMF6    |
| 0.000109259 | stable | PMS2L2    |
| 0.000109865 | stable | TIA1      |
| 0.000110402 | stable | SPRYD3    |
| 0.000110498 | stable | SHMT2     |
| 0.000110529 | stable | CSGLCA-T  |
| 0.000110537 | stable | LOC654346 |
| 0.000110649 | stable | FXR2      |
| 0.000110663 | stable | THOC2     |
| 0.000110885 | stable | TTC5      |
| 0.00011113  | stable | POLE3     |
| 0.000112244 | stable | ZNF510    |
| 0.000112704 | stable | LOC400406 |
| 0.000112871 | stable | KIAA0133  |
| 0.000113389 | stable | CNN2      |
| 0.000113389 | stable | C1ORF168  |
| 0.000113492 | stable | TERF2IP   |
| 0.000113492 | stable | LOC731314 |
| 0.000113983 | stable | CD63      |
| 0.000114738 | stable | COBRA1    |
| 0.000115201 | stable | C6ORF145  |
| 0.000115754 | stable | POLE2     |
| 0.000115845 | stable | KCNJ8     |
| 0.000115851 | stable | CALCOCO2  |
| 0.000115882 | stable | LOC648749 |
| 0.000116445 | stable | YEATS4    |
| 0.000116665 | stable | AGA       |
| 0.000116729 | stable | NUPL2     |
| 0.000117523 | stable | C9ORF142  |
| 0.000117814 | stable | SLC38A8   |
| 0.000117816 | stable | ZFAND5    |
| 0.000117907 | stable | KIF7      |
| 0.000118268 | stable | ANKRD29   |
| 0.000118536 | stable | CCDC104   |
| 0.000118547 | stable | KIAA1324L |
| 0.000118554 | stable | ATG4B     |
| 0.000118593 | stable | SP100     |
| 0.000118826 | stable | MAP4K2    |
| 0.000118963 | stable | LOC650215 |
| 0.00011924  | stable | INPP4B    |
| 0.000119401 | stable | LRRC2     |
| 0.000119414 | stable | GATA4     |
| 0.000119432 | stable | CYBASC3   |
| 0.000119432 | stable | KIAA0319L |
| 0.000119474 | stable | GRIPAP1   |
| 0.000119894 | stable | LRRC3B    |
| 0.000121029 | stable | SLC2A11   |
| 0.000121152 | down   | EGR1      |



## DEG.infomation

|             |        |           |
|-------------|--------|-----------|
| 0.000121487 | stable | EMD       |
| 0.0001215   | stable | RHBDL1    |
| 0.000121649 | stable | HIST1H4E  |
| 0.00012243  | stable | MGC16169  |
| 0.00012282  | stable | GUCA1B    |
| 0.000122847 | stable | LOC728689 |
| 0.000122915 | stable | DDAH1     |
| 0.000123264 | stable | C14ORF153 |
| 0.000123537 | stable | TRIM56    |
| 0.000123597 | stable | DYSFIP1   |
| 0.000123793 | stable | MLL       |
| 0.000123846 | stable | NMRAL1    |
| 0.00012469  | stable | LOC653226 |
| 0.00012476  | stable | FTO       |
| 0.00012635  | stable | UTP18     |
| 0.000126386 | stable | CHD6      |
| 0.00012647  | stable | PRUNE     |
| 0.000127048 | stable | HLA-DRB6  |
| 0.000127549 | stable | ATP6V1A   |
| 0.000128097 | stable | C5ORF13   |
| 0.000128244 | stable | RASGRP2   |
| 0.000128605 | stable | PLEKHA4   |
| 0.000128737 | stable | C18ORF55  |
| 0.000129026 | stable | TRAM1     |
| 0.000129135 | stable | GOLGA6B   |
| 0.000129365 | stable | C3ORF18   |
| 0.000129561 | stable | TMC6      |
| 0.000129561 | stable | C14ORF180 |
| 0.000129696 | stable | SLFN11    |
| 0.000129895 | stable | HLA-DMA   |
| 0.00013032  | stable | IGSF6     |
| 0.000130472 | stable | ECD       |
| 0.00013056  | stable | LOC221442 |
| 0.000130817 | stable | OXSRI     |
| 0.000131304 | stable | LOC645937 |
| 0.000131634 | stable | MKRN1     |
| 0.000131748 | stable | ZKSCAN2   |
| 0.000131748 | stable | TFF3      |
| 0.000132335 | stable | PDE6A     |
| 0.000132584 | stable | LOC653082 |
| 0.000133521 | stable | S1PR4     |
| 0.000133595 | stable | WDR27     |
| 0.000133979 | stable | S100PBP   |
| 0.000134404 | stable | RBMS3     |
| 0.000134424 | stable | LOC201725 |
| 0.000134424 | stable | MAMDC2    |
| 0.000134424 | down   | PCDH20    |
| 0.000134464 | stable | SNORD4A   |
| 0.000134694 | stable | JMJD6     |
| 0.000135668 | stable | CDK6      |
| 0.000135727 | stable | EXOC6     |

## DEG.infomation

|             |        |           |
|-------------|--------|-----------|
| 0.000135882 | stable | BCDIN3D   |
| 0.000137431 | stable | MYO5B     |
| 0.000137432 | stable | CXCL1     |
| 0.000137436 | down   | CPNE4     |
| 0.000137755 | stable | EBPL      |
| 0.000138304 | stable | CCNDBP1   |
| 0.00013868  | stable | VDAC1     |
| 0.000139109 | stable | LOC643031 |
| 0.000139386 | stable | IL1RN     |
| 0.000139543 | stable | MICALL2   |
| 0.000139543 | stable | RPS5      |
| 0.000139668 | stable | LRRC20    |
| 0.000139853 | stable | TUBG2     |
| 0.000140135 | stable | SERHL     |
| 0.000141275 | stable | RBMS2     |
| 0.000141633 | stable | TRIM24    |
| 0.000142183 | stable | ERCC1     |
| 0.000142643 | stable | REXO2     |
| 0.000142812 | stable | ZNF200    |
| 0.000142855 | stable | HCG4      |
| 0.000142855 | stable | SERTAD2   |
| 0.000143875 | stable | FKBP1A    |
| 0.000144059 | stable | NME4      |
| 0.00014473  | stable | NFKBIB    |
| 0.000145087 | stable | IMMT      |
| 0.000145817 | stable | HELLS     |
| 0.00014612  | stable | B4GALT7   |
| 0.000146648 | stable | LOC650826 |
| 0.000146649 | stable | PPHLN1    |
| 0.000146848 | stable | MRPS26    |
| 0.000147066 | stable | CSNK1E    |
| 0.000147091 | stable | LOC153561 |
| 0.000148206 | stable | PDE3B     |
| 0.000148271 | stable | CABP1     |
| 0.000148697 | stable | ITGAX     |
| 0.000149712 | stable | WIBG      |
| 0.000149712 | stable | TPD52L2   |
| 0.000149712 | stable | TCAP      |
| 0.000149875 | stable | ARL1      |
| 0.000150193 | stable | PLCB4     |
| 0.000150805 | stable | C2CD2     |
| 0.000150818 | stable | CHMP4A    |
| 0.000151405 | stable | RAPSN     |
| 0.000151775 | stable | COQ5      |
| 0.000151973 | stable | POMZP3    |
| 0.000151973 | stable | ZBED5     |
| 0.000152314 | stable | EMILIN3   |
| 0.000152347 | stable | TXN       |
| 0.000152787 | stable | TCEA2     |
| 0.000154988 | stable | NR4A3     |
| 0.000155058 | stable | KCNN3     |

## DEG.infomation

|             |        |           |
|-------------|--------|-----------|
| 0.000155515 | stable | SLC35E3   |
| 0.000155515 | stable | C10ORF54  |
| 0.000155766 | stable | NRBP2     |
| 0.000155766 | stable | BCKDHA    |
| 0.000156009 | stable | TUSC3     |
| 0.000156253 | stable | DNLZ      |
| 0.000156967 | stable | FCER1A    |
| 0.000157293 | stable | UCK2      |
| 0.000157994 | stable | MTHFS     |
| 0.000158413 | stable | MBD5      |
| 0.000158433 | stable | TMEM139   |
| 0.000159043 | stable | WBP2      |
| 0.000160656 | stable | TBRG4     |
| 0.000161378 | stable | MRPL36    |
| 0.000162286 | stable | TGFBI     |
| 0.000162497 | stable | SLC29A1   |
| 0.000162667 | stable | LOC647834 |
| 0.000162736 | stable | SNORD36C  |
| 0.000163044 | stable | KIAA0195  |
| 0.000163459 | stable | GALNTL4   |
| 0.000163494 | stable | UBE2D3    |
| 0.000163836 | stable | CATSPER2  |
| 0.00016391  | stable | JUP       |
| 0.000164539 | stable | CGNL1     |
| 0.000165034 | stable | SOX6      |
| 0.000165729 | stable | XRN2      |
| 0.000166569 | stable | HDGFRP3   |
| 0.000166796 | stable | FYN       |
| 0.000166968 | stable | QKI       |
| 0.000167094 | stable | LCN2      |
| 0.000167375 | stable | C11ORF65  |
| 0.000167399 | stable | GPAA1     |
| 0.000167461 | stable | ZNF259    |
| 0.00016751  | stable | KLHL4     |
| 0.000167693 | stable | SNX16     |
| 0.000167693 | stable | MRPL11    |
| 0.000167716 | stable | RP2       |
| 0.000168095 | stable | USP12     |
| 0.000168095 | stable | PRDX3     |
| 0.000168095 | stable | PLN       |
| 0.000168934 | stable | CACNA1B   |
| 0.000169102 | stable | PACS1     |
| 0.000170457 | stable | TLE4      |
| 0.000170854 | stable | LACTB2    |
| 0.000171024 | stable | DCTN1     |
| 0.000171107 | stable | MRPL3     |
| 0.000171327 | stable | CAPN2     |
| 0.000171436 | stable | C10ORF119 |
| 0.000171615 | stable | LIMS1     |
| 0.000171615 | stable | LOC390705 |
| 0.000171633 | stable | PAIP2     |

## DEG.infomation

|             |        |           |
|-------------|--------|-----------|
| 0.000172903 | stable | LOC650111 |
| 0.000173003 | stable | COQ10A    |
| 0.000173082 | stable | COASY     |
| 0.000173106 | stable | ASB13     |
| 0.000173128 | stable | WBP4      |
| 0.000173136 | stable | RHBDL3    |
| 0.000174945 | stable | ITGA2     |
| 0.000175048 | stable | ANXA7     |
| 0.00017545  | stable | BAT1      |
| 0.000175594 | stable | TNFRSF25  |
| 0.000175924 | stable | MYL3      |
| 0.000176011 | stable | NUAK2     |
| 0.000176495 | stable | KLHL11    |
| 0.000176495 | stable | DDX3X     |
| 0.000176693 | stable | USP15     |
| 0.000176694 | stable | SMARCC1   |
| 0.000177315 | stable | THAP4     |
| 0.000177316 | stable | PEBP1     |
| 0.000177629 | stable | FGFR3     |
| 0.00017856  | stable | LOC51057  |
| 0.000178995 | stable | PTPRD     |
| 0.0001791   | stable | SH3GLB2   |
| 0.000179329 | stable | LOC388524 |
| 0.000180083 | stable | LOC729776 |
| 0.000180088 | stable | TXNL2     |
| 0.000180747 | stable | LOC643665 |
| 0.000181062 | stable | TTL12     |
| 0.000181062 | stable | ATG7      |
| 0.000182    | stable | C3ORF34   |
| 0.000182478 | stable | BCL9L     |
| 0.000182758 | stable | PAK1IP1   |
| 0.000182869 | stable | ZBTB17    |
| 0.000182978 | stable | COL20A1   |
| 0.000184491 | stable | KIAA0430  |
| 0.000184557 | stable | ZNF441    |
| 0.000185083 | stable | FNTB      |
| 0.000185314 | stable | TLR2      |
| 0.000185837 | stable | C7ORF50   |
| 0.000186548 | stable | IQGAP1    |
| 0.000186702 | stable | DMAP1     |
| 0.000187213 | stable | HIGD2A    |
| 0.000187292 | stable | KLHL28    |
| 0.000187449 | stable | EXOC1     |
| 0.000188562 | stable | CIDEC     |
| 0.000189487 | stable | THTPA     |
| 0.0001895   | stable | ERLIN2    |
| 0.000189704 | stable | CCNJ      |
| 0.000189776 | stable | AQP7P2    |
| 0.00019007  | stable | BBX       |
| 0.000190236 | stable | GSTP1     |
| 0.000190293 | stable | TCF20     |

## DEG.infomation

|             |        |           |
|-------------|--------|-----------|
| 0.000190707 | stable | OXCT2     |
| 0.000190707 | stable | KIAA1618  |
| 0.000191423 | stable | FAM14A    |
| 0.000191593 | stable | CALD1     |
| 0.000191642 | stable | BCL2L1    |
| 0.000192171 | stable | UBR5      |
| 0.000192177 | stable | CEP350    |
| 0.000192736 | stable | NET1      |
| 0.000193718 | stable | RETSAT    |
| 0.000193766 | stable | TK1       |
| 0.000193861 | stable | NMT2      |
| 0.000194008 | stable | DEF6      |
| 0.000195181 | stable | MTX1      |
| 0.000197861 | stable | RPIA      |
| 0.00019916  | stable | APEX2     |
| 0.00019916  | stable | MTX2      |
| 0.000199836 | stable | LOC648304 |
| 0.000199865 | stable | LRBA      |
| 0.000200138 | stable | STK17B    |
| 0.000200607 | stable | TUBB4     |
| 0.000200918 | stable | LOC285053 |
| 0.000201314 | stable | FAM40B    |
| 0.000201663 | stable | DKK1      |
| 0.000201757 | stable | PGR       |
| 0.000201793 | stable | MED27     |
| 0.00020181  | stable | TEK       |
| 0.000202068 | stable | SGMS2     |
| 0.000202251 | stable | SP4       |
| 0.000202251 | stable | BMS1      |
| 0.000202405 | stable | C14ORF93  |
| 0.000203744 | stable | C16ORF80  |
| 0.000204063 | stable | HMBS      |
| 0.000204794 | stable | ZFP91     |
| 0.000205387 | stable | PSMC3IP   |
| 0.000205647 | stable | ZNF428    |
| 0.000206128 | stable | ALG8      |
| 0.000206287 | stable | PPP1R12C  |
| 0.000208686 | stable | SOD2      |
| 0.000209043 | stable | IGFBP3    |
| 0.000209909 | stable | ARC       |
| 0.000210323 | stable | ERMP1     |
| 0.000211548 | stable | LOC652815 |
| 0.000211616 | stable | COX17     |
| 0.000212486 | stable | CXORF45   |
| 0.000212496 | stable | BRPF3     |
| 0.000212496 | stable | AP1G2     |
| 0.000213411 | stable | SCYL1     |
| 0.000213886 | stable | DUSP19    |
| 0.00021438  | stable | KCNC4     |
| 0.00021438  | stable | LOC647210 |
| 0.000215204 | stable | LOC149134 |

DEG.infomation

|             |        |           |
|-------------|--------|-----------|
| 0.000215323 | stable | MUT       |
| 0.00021541  | stable | SAFB      |
| 0.000215418 | stable | TOP2B     |
| 0.00021638  | stable | KIAA0556  |
| 0.000217057 | stable | ASIP      |
| 0.000217488 | stable | DSEL      |
| 0.000219049 | stable | PGS1      |
| 0.000219049 | stable | PIGK      |
| 0.000219169 | stable | DHX34     |
| 0.000219589 | stable | AKNA      |
| 0.000219652 | stable | TBX15     |
| 0.000219706 | stable | SNORD14B  |
| 0.000220946 | stable | PALLD     |
| 0.000220946 | stable | RNF11     |
| 0.000221763 | stable | TNFSF4    |
| 0.000222163 | stable | PCNA      |
| 0.000222515 | stable | RPL7L1    |
| 0.000222515 | stable | P4HB      |
| 0.000223955 | stable | RUVBL2    |
| 0.000226038 | stable | SRP14     |
| 0.000226082 | stable | MAPRE2    |
| 0.000226082 | stable | CTHRC1    |
| 0.000226846 | stable | CYP2R1    |
| 0.000227181 | stable | XPO6      |
| 0.000227181 | stable | P8        |
| 0.000227585 | stable | TRIB3     |
| 0.000229239 | stable | ASXL1     |
| 0.000231122 | stable | ALKBH2    |
| 0.00023175  | stable | WDR69     |
| 0.000232018 | stable | ARL15     |
| 0.000232302 | stable | C16ORF58  |
| 0.000233874 | stable | TLL1      |
| 0.000234331 | stable | MOSPD2    |
| 0.000238346 | stable | AVEN      |
| 0.000238428 | stable | FLJ36070  |
| 0.000239615 | stable | RNASEL    |
| 0.000241641 | stable | SIRT7     |
| 0.000242883 | stable | MESDC1    |
| 0.000242883 | stable | LAMB2     |
| 0.000242883 | stable | GAS7      |
| 0.000242883 | stable | SP110     |
| 0.000242892 | stable | ODF2      |
| 0.000243484 | stable | KRT10     |
| 0.000243484 | stable | ZFP1      |
| 0.000243484 | stable | TBL2      |
| 0.000243752 | stable | MTERFD1   |
| 0.000246548 | stable | LOC646567 |
| 0.000248803 | stable | C12ORF45  |
| 0.00024967  | stable | FLJ46230  |
| 0.00025003  | stable | MICAL1    |
| 0.000250071 | stable | C6ORF173  |

## DEG.infomation

|             |        |           |
|-------------|--------|-----------|
| 0.000250438 | stable | NUP85     |
| 0.000250826 | stable | DCUN1D1   |
| 0.000252974 | stable | RPL18A    |
| 0.000253227 | stable | XRCC2     |
| 0.000253387 | stable | GMEB2     |
| 0.000253603 | stable | UBR2      |
| 0.000254111 | stable | TUBA8     |
| 0.000255097 | stable | ABCA10    |
| 0.00025522  | stable | DCTN4     |
| 0.000256104 | stable | GNPAT     |
| 0.000258483 | stable | C6ORF47   |
| 0.000259118 | stable | FABP6     |
| 0.000260818 | stable | P2RY6     |
| 0.000261166 | stable | INPPL1    |
| 0.000261727 | stable | TMEM14B   |
| 0.000263326 | stable | PTGS1     |
| 0.000263664 | stable | EFHC1     |
| 0.000263678 | stable | PTPRE     |
| 0.000263875 | stable | C12ORF49  |
| 0.000265534 | stable | DNAH1     |
| 0.000265653 | stable | TMED5     |
| 0.000265939 | stable | ANKRD40   |
| 0.000266213 | stable | FANCG     |
| 0.000266386 | stable | HOOK1     |
| 0.00026642  | stable | CHCHD7    |
| 0.000267008 | stable | DENND1B   |
| 0.000269188 | stable | C9ORF86   |
| 0.000269771 | stable | YARS2     |
| 0.000272217 | stable | PPAPDC2   |
| 0.000272728 | stable | IRAK2     |
| 0.000273235 | stable | C6ORF1    |
| 0.00027341  | stable | SUPT16H   |
| 0.000275146 | stable | PUS10     |
| 0.00027595  | stable | SMCR7     |
| 0.000279019 | stable | ANGPTL7   |
| 0.00027925  | stable | TBX3      |
| 0.000279323 | stable | EPPB9     |
| 0.000279492 | stable | ITFG1     |
| 0.000280005 | stable | CASQ2     |
| 0.000280066 | stable | OAT       |
| 0.000280488 | stable | TRIM29    |
| 0.000280576 | stable | PCNP      |
| 0.000280852 | stable | RLN2      |
| 0.000283116 | stable | LOC644254 |
| 0.000283116 | stable | SMC3      |
| 0.000283937 | stable | WDR35     |
| 0.000284531 | stable | ANO10     |
| 0.000285176 | stable | ZNF137    |
| 0.000286232 | stable | CSNK1G2   |
| 0.000287471 | stable | PAN2      |
| 0.000288575 | stable | EIF3C     |

## DEG.infomation

|             |        |           |
|-------------|--------|-----------|
| 0.000288611 | stable | TIGA1     |
| 0.000288611 | stable | ARCN1     |
| 0.000288847 | stable | C15ORF15  |
| 0.000289085 | stable | MAP3K7    |
| 0.000289682 | stable | CBARA1    |
| 0.000290112 | stable | ANO7      |
| 0.000291953 | stable | SPR       |
| 0.000291953 | stable | LOC441108 |
| 0.000291997 | stable | KLHL30    |
| 0.000292393 | stable | GAS8      |
| 0.000293678 | stable | C1ORF181  |
| 0.000293907 | stable | CLEC7A    |
| 0.000294118 | stable | C1ORF163  |
| 0.000294827 | stable | PTX3      |
| 0.000296227 | stable | TMEM86A   |
| 0.000298503 | stable | SOX13     |
| 0.00030145  | stable | OAZ1      |
| 0.000301691 | stable | LOC653505 |
| 0.000302056 | stable | C3ORF45   |
| 0.000302232 | stable | ZCWPW1    |
| 0.000302865 | stable | ANXA2P1   |
| 0.000302876 | stable | NCOA2     |
| 0.000303299 | stable | R3HDM2    |
| 0.000304491 | stable | ZSWIM5    |
| 0.000306432 | stable | PPP1R16B  |
| 0.000307545 | stable | BEXL1     |
| 0.000310131 | stable | CPXM1     |
| 0.000310426 | stable | CDGAP     |
| 0.000312531 | stable | LCMT2     |
| 0.000313421 | stable | RAB7A     |
| 0.000314162 | stable | KIF1A     |
| 0.000314231 | stable | IFT81     |
| 0.000314233 | stable | COL5A3    |
| 0.00031486  | stable | PSMD2     |
| 0.000314879 | stable | TCEAL2    |
| 0.000315105 | stable | LOC728153 |
| 0.00031555  | stable | UTX       |
| 0.000316798 | stable | NXN       |
| 0.000319451 | stable | PMP22     |
| 0.000319751 | stable | SNORD46   |
| 0.000319879 | stable | NOL14     |
| 0.000320106 | stable | LOC648984 |
| 0.00032214  | stable | MEGF9     |
| 0.000322695 | stable | C15ORF57  |
| 0.000323309 | stable | CWF19L2   |
| 0.000323691 | stable | C1ORF122  |
| 0.000323691 | stable | ESRRA     |
| 0.000323867 | stable | N4BP2L1   |
| 0.00032447  | stable | POLR2L    |
| 0.000324868 | stable | NAPEPLD   |
| 0.000327671 | stable | ALDH3B1   |



## DEG.infomation

|             |        |           |
|-------------|--------|-----------|
| 0.000327905 | stable | SLC6A18   |
| 0.000329635 | stable | BXDC1     |
| 0.000330081 | stable | KIAA0391  |
| 0.000330523 | stable | ZMYM1     |
| 0.000331347 | stable | PCNX      |
| 0.000333361 | down   | FOSB      |
| 0.000333361 | stable | SYNJ2     |
| 0.000334342 | stable | PI4K2B    |
| 0.000335949 | stable | C7ORF20   |
| 0.000336633 | stable | TBCC      |
| 0.000337382 | stable | TRIM68    |
| 0.000337572 | stable | CSTF3     |
| 0.000338942 | stable | TCEB1     |
| 0.000340209 | stable | BRPF1     |
| 0.00034335  | stable | CENTA1    |
| 0.000344221 | stable | LOC401115 |
| 0.000344923 | stable | IRX4      |
| 0.000345788 | stable | SRXN1     |
| 0.000346601 | stable | KIAA0892  |
| 0.000347089 | stable | WDR91     |
| 0.000347676 | stable | CASP1     |
| 0.000348026 | stable | NDUFB4    |
| 0.000348762 | stable | MCM4      |
| 0.000348885 | stable | HPSE      |
| 0.000351086 | stable | SLC25A5   |
| 0.000355111 | stable | DUSP3     |
| 0.000355892 | stable | RTN4IP1   |
| 0.000356383 | stable | FLJ39639  |
| 0.000356758 | stable | KIFAP3    |
| 0.000356883 | stable | UBD       |
| 0.000358181 | stable | B4GALT4   |
| 0.000358827 | stable | NKX2-5    |
| 0.000358873 | stable | MAPK3     |
| 0.000358932 | stable | LOC641978 |
| 0.000361675 | stable | GMIP      |
| 0.000361786 | stable | GCNT1     |
| 0.000362598 | stable | GTPBP8    |
| 0.000362897 | stable | CD4       |
| 0.000363481 | stable | C3ORF38   |
| 0.000365526 | stable | C21ORF122 |
| 0.000366121 | stable | TCN2      |
| 0.000367123 | stable | CENTG2    |
| 0.000367165 | stable | LASS6     |
| 0.000367165 | stable | FLJ23834  |
| 0.00036738  | stable | REEP1     |
| 0.000368182 | stable | CHEK2     |
| 0.000369967 | stable | RAB6A     |
| 0.000369967 | stable | ITGA10    |
| 0.000370046 | stable | HIST3H2A  |
| 0.000373424 | stable | ZNF266    |
| 0.000374294 | stable | PRPF40B   |

## DEG.infomation

|             |        |            |
|-------------|--------|------------|
| 0.000376024 | stable | JTB        |
| 0.000376265 | stable | MXRA7      |
| 0.000378939 | stable | METTL9     |
| 0.000379045 | stable | C3ORF19    |
| 0.000379193 | stable | LOC644869  |
| 0.000379399 | stable | TLR5       |
| 0.000379755 | stable | RXRA       |
| 0.000380512 | stable | RFTN2      |
| 0.000381264 | stable | CTSH       |
| 0.00038298  | stable | CENTD1     |
| 0.000387192 | stable | KIAA0251   |
| 0.000387307 | stable | SAV1       |
| 0.000388471 | stable | RUFY2      |
| 0.00038937  | stable | UBE3C      |
| 0.000390254 | stable | GANAB      |
| 0.000390763 | stable | LYPLA2     |
| 0.000391518 | stable | SFRS2      |
| 0.000392427 | stable | ADO        |
| 0.000392704 | stable | FMO3       |
| 0.000392704 | stable | RNASEN     |
| 0.000392895 | stable | C8ORF55    |
| 0.000393377 | stable | DBNDD2     |
| 0.000394611 | stable | LOC85389   |
| 0.000394611 | stable | MON1B      |
| 0.000398183 | stable | C14ORF149  |
| 0.00039947  | stable | RGS18      |
| 0.000401113 | stable | FLJ35429   |
| 0.000403379 | stable | SEMA4A     |
| 0.000403746 | stable | REV1       |
| 0.000403867 | stable | NDUFV1     |
| 0.000404172 | stable | STAM       |
| 0.000404246 | stable | TOP3A      |
| 0.000404372 | stable | C21ORF91   |
| 0.000406017 | stable | TRIP13     |
| 0.000407035 | stable | LOC26010   |
| 0.000407385 | stable | NQO1       |
| 0.000409827 | stable | TLL4       |
| 0.000411349 | stable | LYRM5      |
| 0.000411608 | stable | SCAND1     |
| 0.000412246 | stable | TCTN1      |
| 0.000413055 | stable | LOC730083  |
| 0.000417324 | stable | SHANK3     |
| 0.000418238 | stable | ADCY1      |
| 0.000418554 | stable | ATP5G1     |
| 0.000418698 | stable | COL9A2     |
| 0.000419509 | stable | WDR92      |
| 0.000421777 | stable | JARID1B    |
| 0.000422345 | stable | EXOC4      |
| 0.00042299  | stable | DNAL1      |
| 0.000423173 | stable | SNHG3-RCC1 |
| 0.000423794 | stable | SMCHD1     |

## DEG.infomation

|             |        |           |
|-------------|--------|-----------|
| 0.000423982 | stable | LOC401284 |
| 0.000425401 | stable | LDLRAP1   |
| 0.000425929 | stable | SSBP2     |
| 0.000428042 | stable | AKR1C3    |
| 0.000428088 | stable | ZBTB16    |
| 0.000428128 | stable | PPARGC1A  |
| 0.000429143 | stable | SLC16A12  |
| 0.000429427 | stable | LOC645018 |
| 0.00042971  | stable | CCDC77    |
| 0.00042971  | stable | MTX3      |
| 0.000431158 | stable | ASMTL     |
| 0.000433816 | stable | GALE      |
| 0.000433928 | stable | VEZT      |
| 0.000434445 | stable | SCN3B     |
| 0.000437341 | stable | MLYCD     |
| 0.000437341 | stable | MMD       |
| 0.000438163 | stable | UGDH      |
| 0.000438567 | stable | NUFIP2    |
| 0.000438905 | stable | EDARADD   |
| 0.000438968 | stable | ELP2      |
| 0.000439456 | stable | C22ORF30  |
| 0.000440497 | stable | PPAPDC3   |
| 0.000440943 | stable | HADH2     |
| 0.000442054 | stable | DNALI1    |
| 0.000442163 | stable | ARIH1     |
| 0.000442163 | stable | BTG3      |
| 0.000444674 | stable | KIAA0802  |
| 0.000445417 | stable | STAMPB    |
| 0.00044604  | stable | RIOK3     |
| 0.000446199 | stable | AMY1A     |
| 0.000446928 | stable | RPS15     |
| 0.000449708 | stable | PSD3      |
| 0.000449768 | stable | TMEM63A   |
| 0.000452027 | stable | EBF3      |
| 0.000453318 | stable | TFCP2     |
| 0.000453703 | stable | LOC440928 |
| 0.000453708 | stable | DGCR6     |
| 0.000454815 | stable | GMEB1     |
| 0.000456108 | stable | MRPL55    |
| 0.000456461 | stable | NDST2     |
| 0.000456566 | stable | EPC1      |
| 0.000456724 | stable | MOCS2     |
| 0.000457338 | stable | MRPS35    |
| 0.000457338 | stable | LOC653479 |
| 0.000458765 | stable | NMNAT1    |
| 0.0004602   | stable | STAT6     |
| 0.000460748 | stable | SLC2A14   |
| 0.000460748 | stable | SPRYD4    |
| 0.000461406 | stable | PITX3     |
| 0.000463185 | stable | PIK4CA    |
| 0.00046424  | stable | VCAN      |

DEG.infomation

|             |        |           |
|-------------|--------|-----------|
| 0.000467425 | stable | ZNF416    |
| 0.00046842  | stable | JUN       |
| 0.000468642 | stable | SRRD      |
| 0.000469178 | stable | HIVEP1    |
| 0.000470153 | stable | AUH       |
| 0.000470788 | stable | AZI2      |
| 0.000474337 | stable | ALKBH3    |
| 0.000476146 | stable | RAB43     |
| 0.000477055 | stable | SENP6     |
| 0.000477055 | stable | LMBR1     |
| 0.000479268 | stable | KIAA0776  |
| 0.000480429 | stable | LY6E      |
| 0.000480976 | stable | PARK7     |
| 0.000480979 | stable | TMEM37    |
| 0.000482025 | stable | LOC727935 |
| 0.00048431  | stable | PCYOX1    |
| 0.000484822 | stable | LOC644390 |
| 0.000488982 | stable | DCK       |
| 0.000489061 | stable | AKAP6     |
| 0.000489163 | stable | PFTK1     |
| 0.000489163 | stable | LRAP      |
| 0.000489741 | stable | C1ORF218  |
| 0.000490254 | stable | NUCB1     |
| 0.000493019 | stable | LOC644863 |
| 0.000494108 | stable | MYO1F     |
| 0.000498021 | stable | NT5DC2    |
| 0.00050027  | stable | ADNP      |
| 0.000500799 | stable | PIK3CD    |
| 0.000503649 | stable | PKN2      |
| 0.000503969 | stable | OGT       |
| 0.000503969 | stable | C8ORF4    |
| 0.000517679 | stable | PCNT      |
| 0.000517758 | stable | ATP5SL    |
| 0.000518599 | stable | FOXC2     |
| 0.000518815 | stable | HCG9      |
| 0.000520175 | stable | C7ORF63   |
| 0.000521683 | stable | TMEM216   |
| 0.000531414 | stable | MCTP1     |
| 0.00053511  | stable | MGC20983  |
| 0.000536762 | stable | ECM1      |
| 0.000537077 | stable | DST       |
| 0.00053843  | stable | AATF      |
| 0.000543144 | stable | SOCS4     |
| 0.000543144 | stable | GOLGA8A   |
| 0.000545119 | stable | CYB5R1    |
| 0.000545864 | stable | SETD2     |
| 0.000546149 | down   | ADH1A     |
| 0.000548464 | stable | NOL5A     |
| 0.000548575 | stable | RBM28     |
| 0.000549474 | stable | AMMECR1   |
| 0.000549871 | stable | LRP3      |

## DEG.infomation

|             |        |           |
|-------------|--------|-----------|
| 0.000549871 | stable | RASAL2    |
| 0.000550099 | stable | ZNF658B   |
| 0.000550662 | stable | KCTD14    |
| 0.000551122 | stable | SPAG9     |
| 0.000551169 | stable | ANKRD37   |
| 0.000551169 | stable | COL14A1   |
| 0.000552082 | stable | LOC202051 |
| 0.000552939 | stable | MGC72104  |
| 0.000556904 | stable | TRIM22    |
| 0.000556904 | stable | PVRL3     |
| 0.000556983 | stable | C20ORF39  |
| 0.00055841  | stable | RPL8      |
| 0.000560236 | stable | ZMIZ1     |
| 0.000560801 | stable | STX5      |
| 0.000562565 | stable | AS3MT     |
| 0.000564336 | stable | RYBP      |
| 0.000565652 | stable | NFU1      |
| 0.000568588 | stable | RNF41     |
| 0.000571885 | stable | ZNF136    |
| 0.000572099 | stable | C21ORF124 |
| 0.000572653 | stable | ADAMTS1   |
| 0.000579001 | stable | UTP14C    |
| 0.000580308 | stable | C2ORF49   |
| 0.000581218 | stable | CSNK1G3   |
| 0.000582133 | stable | CXORF38   |
| 0.000583669 | stable | LOC651575 |
| 0.000583677 | stable | GTF3C1    |
| 0.000583924 | stable | PACS2     |
| 0.00058456  | stable | HSPA1B    |
| 0.000586539 | stable | HOXC11    |
| 0.000587977 | stable | DMPK      |
| 0.00058864  | stable | MOCOS     |
| 0.00058864  | stable | NDUFB5    |
| 0.000589067 | stable | ZNF691    |
| 0.000589103 | stable | MED20     |
| 0.000589386 | stable | MYOZ1     |
| 0.000590855 | stable | ZNF14     |
| 0.00059218  | stable | HMGA1     |
| 0.00059218  | stable | LOC644284 |
| 0.000594427 | stable | E4F1      |
| 0.000594496 | stable | MAP3K1    |
| 0.000594623 | stable | AK2       |
| 0.000596655 | stable | IMPDH2    |
| 0.00059808  | stable | MARVELD2  |
| 0.000598164 | stable | PDHX      |
| 0.000598621 | stable | VPS11     |
| 0.000600285 | stable | FAM23B    |
| 0.000600285 | stable | C14ORF102 |
| 0.000601379 | stable | TGDS      |
| 0.000603764 | stable | FLNC      |
| 0.000605393 | stable | LOC642732 |

## DEG.infomation

|             |        |           |
|-------------|--------|-----------|
| 0.000605393 | stable | IFNGR2    |
| 0.000606469 | stable | CHRM2     |
| 0.000609537 | stable | CBFB      |
| 0.000610091 | stable | ZNF438    |
| 0.000610862 | stable | HIST1H1A  |
| 0.000612598 | stable | MS4A6E    |
| 0.000613649 | stable | CYHR1     |
| 0.000614822 | stable | GTF3C2    |
| 0.000621558 | stable | NOLC1     |
| 0.000624916 | stable | LOC653066 |
| 0.000625521 | stable | BEX4      |
| 0.000626545 | stable | DCP1A     |
| 0.000626708 | stable | UBL4A     |
| 0.000627843 | stable | C10ORF6   |
| 0.000628251 | stable | MOG       |
| 0.000628251 | stable | GRAMD3    |
| 0.000629347 | stable | MICAL2    |
| 0.000630307 | stable | GIMAP8    |
| 0.000632273 | stable | C9ORF127  |
| 0.000633476 | stable | THRAP5    |
| 0.000634279 | stable | GTDC1     |
| 0.000634316 | stable | PPP1CC    |
| 0.000635617 | stable | LAP3      |
| 0.000638736 | stable | C3ORF58   |
| 0.00063922  | stable | PRKRIP1   |
| 0.000639786 | stable | NRIP3     |
| 0.000640392 | stable | PECAM1    |
| 0.000640398 | stable | ZNF543    |
| 0.000641442 | stable | PPA1      |
| 0.000642075 | stable | LOC729148 |
| 0.000642582 | stable | ZC3H3     |
| 0.000643595 | stable | ADORA2B   |
| 0.000644118 | stable | FIGNL1    |
| 0.00064734  | stable | SHKBP1    |
| 0.000648418 | stable | CXCL10    |
| 0.000648998 | stable | FLJ22222  |
| 0.000651595 | stable | LOC645100 |
| 0.000651624 | stable | EFHA2     |
| 0.00065298  | stable | HLA-DRB3  |
| 0.000653028 | stable | GSDMB     |
| 0.000653033 | stable | C4ORF30   |
| 0.000653081 | stable | CPLX3     |
| 0.000653391 | stable | OXSM      |
| 0.000654021 | stable | LOC440704 |
| 0.000654525 | stable | SFRS4     |
| 0.000656393 | stable | ZNF2      |
| 0.000657348 | stable | RPL3      |
| 0.000660961 | stable | FZD7      |
| 0.000660961 | stable | NDUFB7    |
| 0.000661731 | stable | DNER      |
| 0.000665722 | stable | LOC653394 |

## DEG.infomation

|             |        |                |
|-------------|--------|----------------|
| 0.000666432 | stable | DKFZP686I15217 |
| 0.000667622 | stable | SERPING1       |
| 0.000667748 | stable | LOC651149      |
| 0.000668154 | stable | RAB13          |
| 0.000670443 | stable | STRBP          |
| 0.000671417 | stable | SHC1           |
| 0.000673235 | stable | LOC653342      |
| 0.000677371 | stable | COPZ1          |
| 0.000677626 | stable | GTF2E1         |
| 0.000678997 | stable | GSTK1          |
| 0.000679931 | stable | ALDOA          |
| 0.000685198 | stable | LOC652826      |
| 0.00068747  | stable | CAPN5          |
| 0.000687819 | stable | LOC653354      |
| 0.000691518 | stable | BIN3           |
| 0.000694178 | stable | PUM1           |
| 0.000696675 | stable | ARPC5          |
| 0.000697191 | stable | TOR1B          |
| 0.000698234 | stable | PPM1A          |
| 0.000699079 | stable | LOC196993      |
| 0.000700266 | stable | VPS35          |
| 0.000702139 | stable | RGR            |
| 0.000708543 | stable | NAGA           |
| 0.000711198 | stable | MAGT1          |
| 0.000712166 | stable | ZNF688         |
| 0.000712367 | stable | PMEPA1         |
| 0.000713095 | stable | PLCZ1          |
| 0.000715983 | stable | PCDH9          |
| 0.00071669  | stable | C14ORF43       |
| 0.000717239 | stable | OSBP2          |
| 0.000719428 | stable | EPM2A          |
| 0.000720329 | stable | AURKAIP1       |
| 0.000723947 | stable | CACNA2D2       |
| 0.000724526 | stable | ZNF687         |
| 0.000724685 | stable | LOC653158      |
| 0.000727303 | stable | CCNG1          |
| 0.000727303 | stable | YTHDF3         |
| 0.00073076  | stable | C12ORF34       |
| 0.000732974 | stable | FAM83D         |
| 0.000733837 | stable | PMS2CL         |
| 0.000735925 | stable | NUDT2          |
| 0.000739576 | stable | CDK5RAP2       |
| 0.000742408 | stable | RILPL2         |
| 0.000744112 | stable | LOC124512      |
| 0.000744349 | stable | SSFA2          |
| 0.000747702 | stable | FADS3          |
| 0.000748443 | stable | RHBDD1         |
| 0.000752345 | stable | LSM4           |
| 0.000752345 | stable | CUL4B          |
| 0.000753688 | stable | CBS            |
| 0.000753688 | stable | SUSD2          |

## DEG.infomation

|             |        |           |
|-------------|--------|-----------|
| 0.000754076 | stable | LEO1      |
| 0.000754171 | stable | RFXANK    |
| 0.000754984 | stable | POLR2I    |
| 0.000756849 | stable | ZNF418    |
| 0.000756849 | stable | FAM114A1  |
| 0.000757109 | stable | MED25     |
| 0.0007577   | stable | CLN8      |
| 0.0007577   | stable | LOC401357 |
| 0.000759672 | stable | GRB14     |
| 0.000765506 | stable | HEATR3    |
| 0.000765721 | stable | SUPT5H    |
| 0.000766173 | stable | PPIL4     |
| 0.000769514 | stable | SEL1L2    |
| 0.000770889 | stable | HK1       |
| 0.000773419 | stable | C12ORF52  |
| 0.000780546 | stable | NELL1     |
| 0.000780597 | stable | FAM10A7   |
| 0.000780676 | stable | ATP6V1H   |
| 0.000784189 | stable | PFDN6     |
| 0.000785666 | stable | NEK7      |
| 0.000785883 | stable | TBCCD1    |
| 0.000786983 | stable | ATP6V1E1  |
| 0.000790271 | stable | COPS8     |
| 0.000790453 | stable | IGF2R     |
| 0.000792313 | stable | COL4A6    |
| 0.000794835 | stable | SSH1      |
| 0.000796885 | stable | CUL4A     |
| 0.000801376 | stable | NRP1      |
| 0.000802596 | stable | DNM1L     |
| 0.000805465 | stable | CCDC132   |
| 0.000805543 | stable | PEG3      |
| 0.000809465 | stable | KRR1      |
| 0.000810176 | stable | PPP2R2B   |
| 0.000813634 | stable | PARP16    |
| 0.000813695 | stable | SELT      |
| 0.000815329 | stable | NKIRAS1   |
| 0.000816185 | stable | TSEN2     |
| 0.000816185 | stable | GRN       |
| 0.000820476 | stable | RAB40C    |
| 0.000821937 | stable | GPC1      |
| 0.000822424 | stable | PHF12     |
| 0.000823375 | stable | THRSP     |
| 0.000823541 | stable | NETO2     |
| 0.000824581 | stable | CPNE1     |
| 0.000825604 | stable | HSPB6     |
| 0.000825604 | stable | PPP1R14C  |
| 0.000826539 | stable | C20ORF196 |
| 0.000827519 | stable | CENTG3    |
| 0.000831897 | stable | SLC41A1   |
| 0.000832771 | stable | STGC3     |
| 0.000833434 | stable | CCDC90B   |



DEG.infomation

|             |        |           |
|-------------|--------|-----------|
| 0.000836067 | stable | HSGT1     |
| 0.000837626 | stable | STAU1     |
| 0.000839802 | stable | C21ORF119 |
| 0.000839837 | stable | FIP1L1    |
| 0.000839837 | stable | C9ORF169  |
| 0.000841354 | stable | ALS2CR16  |
| 0.000841354 | stable | CD274     |
| 0.000842035 | stable | STAT5A    |
| 0.000842326 | stable | SH3BP2    |
| 0.000843225 | stable | KCTD20    |
| 0.000843225 | stable | FOXRED2   |
| 0.000843225 | stable | RBP7      |
| 0.000843225 | stable | TM7SF3    |
| 0.000844797 | stable | CPAMD8    |
| 0.000845864 | stable | SMARCD1   |
| 0.000845864 | stable | MCFD2     |
| 0.000845864 | stable | CLIP3     |
| 0.000846072 | stable | HHEX      |
| 0.000849138 | stable | CYB5A     |
| 0.000851787 | stable | TJP2      |
| 0.000851844 | stable | C1ORF198  |
| 0.000854411 | stable | APPL1     |
| 0.000858836 | stable | MED8      |
| 0.000859036 | stable | DEXI      |
| 0.000859794 | stable | MAPK6     |
| 0.000863972 | stable | MKS1      |
| 0.000864442 | stable | CCDC7     |
| 0.000868435 | stable | NCAM1     |
| 0.000874345 | stable | LOC728417 |
| 0.000879062 | stable | IDI2      |
| 0.000880427 | stable | PSMD10    |
| 0.000881523 | stable | TRIM2     |
| 0.000885808 | stable | SLC44A2   |
| 0.000887547 | stable | MECR      |
| 0.000888036 | stable | GDF15     |
| 0.000888908 | stable | C20ORF30  |
| 0.000893691 | stable | KRAS      |
| 0.000894301 | stable | YPEL5     |
| 0.000894723 | stable | KIAA0020  |
| 0.000895647 | stable | DLK2      |
| 0.000898182 | stable | PLEKHH1   |
| 0.00090098  | stable | C14ORF85  |
| 0.00090492  | stable | AEBP2     |
| 0.000905458 | stable | ABCC3     |
| 0.000906659 | stable | EIF4EBP1  |
| 0.000907327 | stable | LBR       |
| 0.000907506 | stable | DSG4      |
| 0.000908174 | stable | HDGF2     |
| 0.000911376 | stable | FN1       |
| 0.000912248 | stable | AKR1D1    |
| 0.000913742 | stable | ZNF673    |

## DEG.infomation

|             |        |           |
|-------------|--------|-----------|
| 0.000915129 | stable | CSF2RA    |
| 0.000915726 | stable | NPY6R     |
| 0.000922626 | stable | LOC90826  |
| 0.000922626 | stable | CCBL2     |
| 0.000927604 | stable | SCARB1    |
| 0.000929441 | stable | LOC648581 |
| 0.000931648 | stable | BECN1     |
| 0.000931931 | stable | LOC644322 |
| 0.000935341 | stable | ARHGAP28  |
| 0.000935983 | stable | MSTN      |
| 0.000940921 | stable | MYL9      |
| 0.000940921 | stable | C1ORF186  |
| 0.000940921 | stable | CPSF1     |
| 0.000941674 | stable | LOC652541 |
| 0.000943374 | stable | C5ORF29   |
| 0.000943374 | stable | KCNK1     |
| 0.000944951 | stable | PQLC1     |
| 0.000944953 | stable | ATAD1     |
| 0.00094764  | stable | TOMM20    |
| 0.000963682 | stable | TIGD2     |
| 0.000964926 | stable | GCS1      |
| 0.000972383 | stable | MGC70857  |
| 0.000972871 | stable | AQP7      |
| 0.000973378 | stable | HLA-DMB   |
| 0.000974369 | stable | RICTOR    |
| 0.000975718 | stable | L2HGDH    |
| 0.000983208 | stable | GLO1      |
| 0.000987976 | stable | PPOX      |
| 0.000989464 | stable | CENPN     |
| 0.000989906 | stable | SUCLA2    |
| 0.000994254 | stable | FBXO40    |
| 0.000994785 | stable | NDUFS1    |
| 0.001000077 | stable | C13ORF34  |
| 0.001002059 | stable | CCL8      |
| 0.00100533  | stable | MAP1A     |
| 0.001009182 | stable | CCT7      |
| 0.001011039 | stable | PNKD      |
| 0.001011252 | stable | BTBD1     |
| 0.001018031 | stable | DNAJC3    |
| 0.001018031 | stable | C6ORF35   |
| 0.001019087 | stable | LAS1L     |
| 0.001019852 | stable | EEF1E1    |
| 0.001021242 | stable | CDO1      |
| 0.001023077 | stable | ZNF341    |
| 0.001029907 | stable | SLC36A2   |
| 0.001030719 | stable | RHOJ      |
| 0.001035658 | stable | NLRC4     |
| 0.001037542 | stable | PRPF31    |
| 0.001037929 | stable | AASDH     |
| 0.001040229 | stable | PCDHGA12  |
| 0.001042333 | stable | USP31     |

DEG.infomation

|             |        |           |
|-------------|--------|-----------|
| 0.001046197 | stable | WDR40A    |
| 0.00104653  | stable | ZNF546    |
| 0.001049248 | stable | HLA-DQB1  |
| 0.001052199 | stable | LCN10     |
| 0.001053715 | stable | CHST3     |
| 0.001054095 | stable | SLK       |
| 0.001055789 | stable | NUP133    |
| 0.001058019 | stable | WDR8      |
| 0.001058068 | stable | MPZL2     |
| 0.001059173 | stable | ZNF140    |
| 0.00106904  | stable | GYG2      |
| 0.001069701 | stable | CTBS      |
| 0.001069701 | stable | SH3KBP1   |
| 0.00107097  | stable | HSPA14    |
| 0.00107097  | stable | ERCC2     |
| 0.001074428 | stable | TP53I11   |
| 0.001074707 | stable | CTDSPL    |
| 0.001077543 | stable | TLR6      |
| 0.001077543 | stable | TBL1XR1   |
| 0.001081827 | stable | MRPL54    |
| 0.001081879 | stable | LOC390354 |
| 0.001083046 | stable | EIF1B     |
| 0.00108479  | stable | LOC134997 |
| 0.001091031 | stable | IQGAP2    |
| 0.001093666 | stable | C5ORF35   |
| 0.0010955   | stable | DIRAS1    |
| 0.001097431 | stable | CREB1     |
| 0.001100263 | stable | HLA-H     |
| 0.001100263 | stable | PCBP2     |
| 0.001101926 | stable | LOC651316 |
| 0.001103151 | stable | SLC4A1AP  |
| 0.001108569 | stable | DHRS3     |
| 0.001111611 | stable | GCC2      |
| 0.001111611 | stable | NOTCH4    |
| 0.001114262 | stable | C12ORF65  |
| 0.001114319 | stable | FGFRL1    |
| 0.001127692 | stable | NR3C2     |
| 0.001133207 | stable | ZNF160    |
| 0.001133612 | stable | C12ORF4   |
| 0.001133612 | stable | ISOC1     |
| 0.001135195 | stable | LOC727848 |
| 0.001138313 | stable | LOC647389 |
| 0.00113875  | stable | GOLGA1    |
| 0.001140751 | stable | HSCB      |
| 0.001141525 | stable | P2RY1     |
| 0.001142894 | stable | DPY30     |
| 0.001144894 | stable | SYDE2     |
| 0.001144894 | stable | ZBTB33    |
| 0.001146246 | stable | PHB       |
| 0.001147331 | stable | ESR1      |
| 0.001147421 | stable | YY1AP1    |

## DEG.infomation

|             |        |           |
|-------------|--------|-----------|
| 0.001147421 | stable | C3ORF37   |
| 0.001149594 | stable | C10ORF59  |
| 0.001149933 | stable | MAPRE1    |
| 0.001150191 | stable | POLDIP2   |
| 0.00115059  | stable | TMEM44    |
| 0.001151208 | stable | ISCA1     |
| 0.001158046 | stable | FLJ42875  |
| 0.0011635   | stable | GMCL1     |
| 0.0011698   | stable | GAB2      |
| 0.001175445 | stable | PPP2CA    |
| 0.001177194 | stable | ICA1      |
| 0.001179151 | stable | TUSC1     |
| 0.001180931 | stable | JPH3      |
| 0.001185253 | stable | C15ORF52  |
| 0.001185253 | stable | ROCK1     |
| 0.00118946  | stable | PSCDBP    |
| 0.001191103 | stable | MGC13057  |
| 0.001193354 | stable | TUBA4A    |
| 0.001194057 | stable | HSPG2     |
| 0.001194625 | stable | VEGFA     |
| 0.001198904 | stable | COL6A1    |
| 0.001198904 | stable | ACO1      |
| 0.001198904 | stable | BCL7B     |
| 0.001199527 | stable | ATG4C     |
| 0.001200118 | stable | KIF15     |
| 0.001200118 | stable | LOC653157 |
| 0.001200965 | stable | OSGIN1    |
| 0.001211483 | stable | MAFK      |
| 0.001211483 | stable | FZD8      |
| 0.00121283  | stable | PLOD2     |
| 0.001212898 | stable | D4S234E   |
| 0.00121683  | stable | STIP1     |
| 0.001217852 | stable | STX16     |
| 0.001218992 | stable | C19ORF61  |
| 0.001221573 | stable | RAPGEFL1  |
| 0.001224627 | stable | SPOCK2    |
| 0.001224627 | stable | C18ORF34  |
| 0.001230307 | stable | UPF3A     |
| 0.001235032 | stable | WISP1     |
| 0.001239666 | stable | C13ORF1   |
| 0.001240827 | stable | NEURL2    |
| 0.001243715 | stable | PIBF1     |
| 0.001244076 | stable | SEPN1     |
| 0.001248832 | stable | GALNTL2   |
| 0.001250195 | stable | EMCN      |
| 0.001252818 | stable | PML       |
| 0.001254609 | stable | LOC651398 |
| 0.001255539 | stable | RPS3      |
| 0.001257358 | stable | VPS39     |
| 0.001259035 | stable | KIAA1219  |
| 0.001260242 | stable | USP49     |

## DEG.infomation

|             |        |           |
|-------------|--------|-----------|
| 0.001260242 | stable | ABHD4     |
| 0.00126192  | stable | DNASE2    |
| 0.001262503 | stable | LOC650683 |
| 0.001271366 | stable | PARP3     |
| 0.001271537 | stable | NDUFS2    |
| 0.001272943 | stable | C7ORF10   |
| 0.001272943 | stable | LOC728744 |
| 0.001284209 | stable | INPP5D    |
| 0.001287507 | stable | ZDHHC7    |
| 0.001289442 | stable | BCO2      |
| 0.001289558 | stable | KCNK6     |
| 0.001294613 | stable | ZNF334    |
| 0.001295724 | up     | XIRP2     |
| 0.001298473 | stable | SYPL2     |
| 0.001298473 | stable | ZMYND17   |
| 0.001303412 | stable | LOC643722 |
| 0.001304579 | stable | LOC727762 |
| 0.001304802 | stable | NUP93     |
| 0.001304802 | stable | C16ORF57  |
| 0.001305175 | stable | LASS2     |
| 0.001309513 | stable | HNRNPUL2  |
| 0.001315683 | stable | MPST      |
| 0.00131698  | stable | ANKDD1A   |
| 0.001327903 | stable | SNRPN     |
| 0.00132911  | stable | IRF5      |
| 0.001332266 | stable | TTC35     |
| 0.001333267 | stable | ZNF383    |
| 0.001333582 | stable | ZNF275    |
| 0.001337729 | stable | LTF       |
| 0.001338071 | stable | LOC730316 |
| 0.001344192 | stable | ARMCX5    |
| 0.001344898 | stable | EHHADH    |
| 0.001344934 | stable | REV3L     |
| 0.001346393 | stable | DLG4      |
| 0.001347375 | stable | LOC646144 |
| 0.001351131 | stable | OBFC2B    |
| 0.001358707 | stable | CCR4      |
| 0.001360764 | stable | ZNF606    |
| 0.001368281 | stable | KCNS1     |
| 0.001370812 | stable | ZFP112    |
| 0.001374167 | stable | PSTK      |
| 0.00137557  | stable | TMEM93    |
| 0.00137557  | stable | ARSG      |
| 0.001377307 | stable | FLJ35220  |
| 0.001377456 | stable | SRPK2     |
| 0.001378114 | stable | VSIG8     |
| 0.001378114 | stable | NUDT1     |
| 0.001381644 | stable | MED11     |
| 0.001391716 | stable | LOC645743 |
| 0.001395449 | stable | YEATS2    |
| 0.001403919 | stable | LRCH1     |

## DEG.infomation

|             |        |           |
|-------------|--------|-----------|
| 0.001414039 | stable | NCAPG2    |
| 0.001424307 | stable | NANP      |
| 0.001427286 | stable | TUBGCP5   |
| 0.001430745 | stable | HPS4      |
| 0.001431677 | stable | PCDH12    |
| 0.001434465 | stable | NXPH4     |
| 0.001435368 | stable | RBM38     |
| 0.001436669 | stable | SAAL1     |
| 0.001437737 | stable | RAPGEF1   |
| 0.001438631 | stable | ARHGAP10  |
| 0.001439046 | stable | LOC388474 |
| 0.001440827 | stable | CD109     |
| 0.00144241  | stable | LYPD2     |
| 0.001443517 | stable | GMFB      |
| 0.001445    | stable | TLL1      |
| 0.001445213 | stable | FAF2      |
| 0.001445213 | stable | COX7A2    |
| 0.001446603 | stable | LOC646531 |
| 0.001454289 | stable | TBCE      |
| 0.001456948 | stable | LOC652968 |
| 0.001456948 | stable | SETDB2    |
| 0.001461384 | stable | GNPDA1    |
| 0.001464091 | stable | GSTM5     |
| 0.001468155 | stable | ZNF549    |
| 0.001468155 | stable | KATNAL2   |
| 0.001473479 | stable | NUCKS1    |
| 0.00147355  | stable | ZNF7      |
| 0.001478106 | stable | ACOT4     |
| 0.001478106 | stable | YBX1      |
| 0.001486928 | stable | KIAA1328  |
| 0.001487815 | stable | LOC550112 |
| 0.001494192 | stable | HABP4     |
| 0.001495299 | stable | EPHA2     |
| 0.001495299 | stable | ILF2      |
| 0.00149683  | stable | TRO       |
| 0.001498664 | stable | NMI       |
| 0.001500043 | stable | ARF1      |
| 0.00150191  | stable | NPAT      |
| 0.001502427 | stable | NR2C2     |
| 0.001503386 | stable | LOC341457 |
| 0.001503386 | stable | FLJ22374  |
| 0.001506061 | stable | HK2       |
| 0.001506921 | stable | CPXM2     |
| 0.001512271 | stable | BCL11A    |
| 0.001513012 | stable | FAM80A    |
| 0.001513185 | stable | TMEM106C  |
| 0.001513226 | stable | POLR2J3   |
| 0.001514241 | stable | C7        |
| 0.001514748 | stable | BAI3      |
| 0.001519329 | stable | ZNF577    |
| 0.001519329 | stable | OCRL      |

DEG.infomation

|             |        |           |
|-------------|--------|-----------|
| 0.001519611 | stable | MFAP1     |
| 0.001521291 | stable | C6ORF199  |
| 0.001526201 | stable | PLEC1     |
| 0.0015299   | stable | TMEM17    |
| 0.001533089 | stable | PHF10     |
| 0.001538385 | stable | DDX50     |
| 0.001543588 | stable | TSR1      |
| 0.001547693 | stable | SCMH1     |
| 0.001547693 | stable | PFKM      |
| 0.00154776  | stable | LOC348262 |
| 0.001548729 | stable | ARPC2     |
| 0.001552845 | stable | FAM186B   |
| 0.001552912 | stable | AMOT      |
| 0.001554654 | stable | CHST10    |
| 0.001554892 | stable | TMEM104   |
| 0.001554968 | stable | C14ORF19  |
| 0.001560507 | stable | APAF1     |
| 0.001563317 | stable | LOC442501 |
| 0.001565303 | stable | BCOR      |
| 0.001568107 | stable | FLJ46309  |
| 0.001571118 | stable | KIF21A    |
| 0.001575608 | stable | NCALD     |
| 0.001588592 | stable | TNRC15    |
| 0.001589643 | stable | LOC644039 |
| 0.001590797 | stable | FLJ37464  |
| 0.001603975 | stable | GSPT2     |
| 0.001606102 | stable | NDFIP2    |
| 0.001608093 | stable | NEDD8     |
| 0.001608093 | stable | CSDE1     |
| 0.001608249 | stable | LOC402560 |
| 0.001610655 | stable | PLXDC2    |
| 0.001613034 | stable | ALDH1L2   |
| 0.001613558 | stable | SBF2      |
| 0.001619093 | stable | LOX       |
| 0.001620353 | stable | LTA       |
| 0.001625056 | stable | C16ORF56  |
| 0.00163251  | stable | TIGD1     |
| 0.001632657 | stable | IL2RA     |
| 0.001633526 | stable | GLRX      |
| 0.001633954 | stable | HSPC268   |
| 0.001645285 | stable | ORC4L     |
| 0.001646133 | stable | MTG1      |
| 0.001646719 | stable | NDUFC1    |
| 0.001655847 | stable | GPR161    |
| 0.001668768 | stable | FUCA2     |
| 0.001670645 | stable | SERPINE2  |
| 0.001670645 | stable | PLDN      |
| 0.001675712 | stable | PGBD5     |
| 0.001677774 | stable | C2ORF63   |
| 0.001681647 | stable | ARL6IP5   |
| 0.001683547 | stable | TNFSF13   |

## DEG.infomation

|             |        |                |
|-------------|--------|----------------|
| 0.001685621 | stable | UBE3B          |
| 0.001691604 | stable | TMED3          |
| 0.001692628 | stable | VPS37D         |
| 0.001693579 | stable | VGf            |
| 0.001695789 | stable | LOC347544      |
| 0.001695789 | stable | LYPD5          |
| 0.001699109 | stable | DPP7           |
| 0.001699732 | stable | PTPN18         |
| 0.001701527 | stable | C6ORF85        |
| 0.001704047 | stable | TSPAN8         |
| 0.001709021 | stable | NUDT9P1        |
| 0.001712399 | stable | CYB561         |
| 0.001712399 | stable | NAP1L2         |
| 0.001713887 | stable | EBF2           |
| 0.001715009 | stable | RNMT           |
| 0.001715726 | stable | MOCS1          |
| 0.001717774 | stable | C6ORF117       |
| 0.001734126 | stable | INSC           |
| 0.001735695 | stable | ZNF669         |
| 0.001740796 | stable | NIT2           |
| 0.001752554 | stable | PLEKHN1        |
| 0.001754599 | stable | TLN1           |
| 0.00175911  | stable | MCAM           |
| 0.00175911  | stable | ST6GAL1        |
| 0.00175911  | stable | ZNF668         |
| 0.001759131 | stable | NAT14          |
| 0.001759131 | stable | ALG5           |
| 0.001759131 | stable | ZNF34          |
| 0.001775009 | stable | NIF3L1         |
| 0.001776363 | stable | C7ORF26        |
| 0.001776596 | stable | SRP72          |
| 0.001781077 | stable | SRP9           |
| 0.001782997 | stable | LOC399744      |
| 0.001786259 | stable | SCCPDH         |
| 0.001786259 | stable | TMEM129        |
| 0.001790305 | stable | SPG3A          |
| 0.00179263  | stable | APIP           |
| 0.001792654 | stable | RAB17          |
| 0.001793724 | stable | NEU1           |
| 0.001793724 | stable | FAM174A        |
| 0.00179379  | stable | NECAP2         |
| 0.001794161 | stable | DKFZP686O24166 |
| 0.001794518 | stable | AHSA2          |
| 0.001798505 | stable | PMPCA          |
| 0.001815454 | stable | RORA           |
| 0.001819226 | stable | DNAJC5         |
| 0.00182435  | stable | BRD3           |
| 0.001826303 | stable | C8ORF58        |
| 0.001832655 | stable | CLPP           |
| 0.001833655 | stable | C11ORF67       |
| 0.001837713 | stable | LOC729466      |



## DEG.infomation

|             |        |           |
|-------------|--------|-----------|
| 0.001838232 | stable | TMEM106B  |
| 0.001838306 | stable | ASPM      |
| 0.001839608 | stable | CCR6      |
| 0.001842012 | stable | IDH3G     |
| 0.001847805 | stable | TMEM161A  |
| 0.001847805 | stable | LOC643466 |
| 0.001847805 | stable | IL1B      |
| 0.001847805 | stable | TRAPPC4   |
| 0.001857532 | stable | TTC32     |
| 0.001858232 | stable | PAK6      |
| 0.001859686 | stable | GNAO1     |
| 0.001861325 | stable | ARL2BP    |
| 0.001861325 | stable | ZNF662    |
| 0.001862749 | stable | TM6SF1    |
| 0.001862749 | stable | UBC       |
| 0.001862892 | stable | WDR24     |
| 0.001864372 | stable | LOC123688 |
| 0.001864401 | stable | TCF4      |
| 0.001869954 | stable | FUBP3     |
| 0.001870651 | stable | ABAT      |
| 0.001870651 | stable | B3GALNT1  |
| 0.001880153 | stable | C12ORF30  |
| 0.001880948 | stable | C5ORF39   |
| 0.00188189  | stable | SSR3      |
| 0.001885681 | stable | HEATR6    |
| 0.001890464 | stable | LOC642755 |
| 0.001895382 | stable | GLUD1     |
| 0.001895771 | stable | C6ORF151  |
| 0.001895771 | stable | C10ORF84  |
| 0.001897631 | stable | FCER2     |
| 0.001898876 | stable | TMEM178   |
| 0.001898913 | stable | REP15     |
| 0.001898967 | stable | AKTIP     |
| 0.00189931  | stable | BNIP1     |
| 0.00189931  | stable | NIPSNAP3A |
| 0.001901087 | stable | DAP3      |
| 0.001901265 | stable | SNORD13   |
| 0.001906514 | stable | FAM158A   |
| 0.001908997 | stable | NAGK      |
| 0.001923693 | stable | TMEM192   |
| 0.001923693 | stable | STK4      |
| 0.001927682 | stable | CANT1     |
| 0.001927851 | stable | MTMR14    |
| 0.001934215 | stable | SLC25A36  |
| 0.001936771 | stable | CPNE5     |
| 0.001945678 | stable | SNRPA     |
| 0.001949858 | stable | LOC400879 |
| 0.001951322 | stable | TMEM54    |
| 0.001952745 | stable | PGRMC1    |
| 0.001957273 | stable | MYL6      |
| 0.001957273 | stable | TRUB2     |

## DEG.infomation

|             |        |           |
|-------------|--------|-----------|
| 0.001964437 | stable | FAM107B   |
| 0.001966501 | stable | ULK1      |
| 0.001966951 | stable | SH3BP4    |
| 0.00196934  | stable | SIL1      |
| 0.001970589 | stable | RNF34     |
| 0.001971163 | stable | IL10RA    |
| 0.001971534 | stable | FBXL10    |
| 0.001975019 | stable | COG7      |
| 0.001977284 | stable | LAMP1     |
| 0.001986029 | stable | C1ORF123  |
| 0.001990541 | stable | NCF1      |
| 0.001997597 | stable | MAST4     |
| 0.001997651 | stable | P2RX4     |
| 0.002005671 | stable | LOC728772 |
| 0.002009468 | stable | LOC653610 |
| 0.002013118 | stable | NLRP7     |
| 0.00201337  | stable | ASF1A     |
| 0.002015596 | stable | MATR3     |
| 0.002035392 | stable | LOC653506 |
| 0.002035392 | stable | FAM13C1   |
| 0.002040048 | stable | ATXN7L3   |
| 0.002046336 | stable | EDN2      |
| 0.002074929 | stable | MMP2      |
| 0.002075003 | stable | VPS36     |
| 0.002080781 | stable | UBE2A     |
| 0.002091409 | stable | SIGLEC16  |
| 0.002091409 | stable | CDK10     |
| 0.002096067 | stable | TC2N      |
| 0.002100724 | stable | NUDT3     |
| 0.002101564 | stable | ZSCAN12   |
| 0.00210477  | stable | ZNF679    |
| 0.002118888 | stable | TMEM218   |
| 0.002135964 | stable | LOC642852 |
| 0.002140886 | stable | SLC7A6    |
| 0.002143733 | stable | AASDHPPT  |
| 0.002148255 | stable | MSH2      |
| 0.00215401  | stable | C19ORF4   |
| 0.002158805 | stable | CRYZ      |
| 0.002162317 | stable | HSF2      |
| 0.002162869 | stable | KIF13B    |
| 0.002163086 | stable | AKAP12    |
| 0.002175774 | stable | LOC654201 |
| 0.002185265 | stable | NAP1L5    |
| 0.002194521 | stable | FAM78B    |
| 0.00219628  | stable | DIS3      |
| 0.002202214 | stable | PRMT5     |
| 0.002205312 | stable | LOC441034 |
| 0.002213849 | stable | SLFN1     |
| 0.002220665 | stable | LOC644162 |
| 0.00222223  | stable | TATDN2    |
| 0.002222612 | stable | CYP2S1    |

## DEG.infomation

|             |        |           |
|-------------|--------|-----------|
| 0.002222612 | stable | ANKRD57   |
| 0.002229757 | stable | STT3A     |
| 0.002230011 | stable | LPPR4     |
| 0.002230476 | stable | MGC61598  |
| 0.002234294 | stable | ASH2L     |
| 0.002242266 | stable | RALA      |
| 0.002244816 | stable | FLJ44076  |
| 0.002250155 | stable | C9ORF72   |
| 0.002258    | stable | WDR21B    |
| 0.002261746 | stable | HRASLS3   |
| 0.002269198 | stable | HP        |
| 0.002270301 | stable | LOC642412 |
| 0.002286829 | stable | PTPRA     |
| 0.002290843 | stable | UBE4B     |
| 0.002295431 | stable | FAM108A3  |
| 0.002300231 | stable | BCAR3     |
| 0.002300511 | stable | C11ORF68  |
| 0.002303786 | stable | ADI1      |
| 0.002304844 | stable | CCDC128   |
| 0.002309747 | stable | COL10A1   |
| 0.002310997 | stable | CXCL12    |
| 0.002312396 | stable | VIPR2     |
| 0.00231768  | stable | FLJ20254  |
| 0.002331006 | stable | SLC7A2    |
| 0.002331642 | stable | LSM3      |
| 0.002350914 | stable | AHNAK     |
| 0.002351783 | stable | ANAPC4    |
| 0.002353177 | stable | CCDC101   |
| 0.002358335 | stable | RAB30     |
| 0.00235888  | stable | ALS2CL    |
| 0.002360816 | stable | ASB16     |
| 0.002360816 | stable | CLIC3     |
| 0.002361517 | stable | ADCY4     |
| 0.002366907 | stable | SPIN1     |
| 0.002371398 | stable | LOC729603 |
| 0.002376056 | stable | RCBTB1    |
| 0.002377378 | stable | WHSC1     |
| 0.002378075 | stable | SLC1A3    |
| 0.002379585 | stable | CLEC2D    |
| 0.002383551 | stable | MFAP3     |
| 0.002385436 | stable | LOC645196 |
| 0.002394968 | stable | TTC1      |
| 0.002394968 | stable | MYBBP1A   |
| 0.002400771 | stable | NMNAT2    |
| 0.002404459 | stable | E2F8      |
| 0.002417195 | stable | SF4       |
| 0.002425655 | stable | ST7       |
| 0.002426212 | stable | CDCP1     |
| 0.002426326 | stable | C5ORF44   |
| 0.002431936 | stable | PXMP3     |
| 0.002432381 | stable | RPS19     |

## DEG.infomation

|             |        |           |
|-------------|--------|-----------|
| 0.002433409 | stable | LMBRD2    |
| 0.002437716 | stable | ADAMTS7   |
| 0.002438207 | stable | C2ORF29   |
| 0.00245661  | stable | CA1       |
| 0.002463425 | stable | MDH2      |
| 0.002464847 | stable | GPSM1     |
| 0.002465215 | stable | KLHL6     |
| 0.002465928 | stable | HCFC1R1   |
| 0.002468352 | stable | LOC649422 |
| 0.002468654 | stable | C6ORF205  |
| 0.002470825 | stable | GRK6      |
| 0.002471591 | stable | LYNX1     |
| 0.002477337 | stable | RPS18     |
| 0.002486343 | stable | NSMAF     |
| 0.002493652 | stable | SIGLEC5   |
| 0.002495306 | stable | DDX5      |
| 0.00250093  | stable | C11ORF51  |
| 0.002505244 | stable | MYBPH     |
| 0.002514514 | stable | C10ORF141 |
| 0.002514514 | stable | SERP1     |
| 0.002524146 | stable | NFRKB     |
| 0.002524601 | stable | KALRN     |
| 0.002527052 | stable | CEACAM1   |
| 0.002531257 | stable | AKAP1     |
| 0.002541102 | stable | GRPEL1    |
| 0.002542532 | stable | HSPBP1    |
| 0.00254417  | stable | LRRC42    |
| 0.002546718 | stable | WDR73     |
| 0.002556803 | stable | C16ORF59  |
| 0.002567723 | stable | SENP7     |
| 0.002577599 | stable | STK36     |
| 0.002584014 | stable | TUBD1     |
| 0.002586771 | stable | CLYBL     |
| 0.002588966 | stable | LMOD1     |
| 0.002592562 | stable | IGSF22    |
| 0.002596556 | stable | MAGED4B   |
| 0.002601867 | stable | DEFB103B  |
| 0.002625063 | stable | TANC1     |
| 0.00263331  | stable | PMS1      |
| 0.002638191 | stable | DPY19L1   |
| 0.002647594 | stable | TBL3      |
| 0.002649712 | stable | MIB2      |
| 0.002651035 | stable | PEX6      |
| 0.002652194 | stable | LRP8      |
| 0.002661522 | stable | ALG1      |
| 0.00266724  | stable | PIK3R2    |
| 0.00266724  | stable | UBE2T     |
| 0.00266724  | stable | LOC284023 |
| 0.002676893 | stable | SC5DL     |
| 0.002678699 | stable | BCAR1     |
| 0.002693136 | stable | ADARB1    |

## DEG.infomation

|             |        |           |
|-------------|--------|-----------|
| 0.0026982   | stable | DKK2      |
| 0.002701714 | stable | CALCB     |
| 0.002710718 | stable | KIAA1012  |
| 0.002711732 | stable | IL17RA    |
| 0.002714086 | stable | RIPK3     |
| 0.002714086 | stable | CARD11    |
| 0.002724657 | stable | LOC339123 |
| 0.002735739 | stable | MAP4K1    |
| 0.002739741 | stable | NDUFC2    |
| 0.002761066 | stable | ZNF580    |
| 0.002761066 | stable | NAT1      |
| 0.002761066 | stable | STC1      |
| 0.002762234 | stable | KIAA1202  |
| 0.002763741 | stable | SDCCAG8   |
| 0.002767408 | stable | PIGU      |
| 0.002774803 | stable | SUSD3     |
| 0.002775323 | stable | RHOBTB1   |
| 0.002779239 | stable | SPCS3     |
| 0.0027818   | stable | POLA1     |
| 0.002783355 | stable | ADAR      |
| 0.002786538 | stable | SAMD8     |
| 0.002787318 | stable | FKBP9     |
| 0.002791212 | stable | SMAD5     |
| 0.002803494 | stable | ZSWIM3    |
| 0.002807005 | stable | EIF2S2    |
| 0.002807005 | stable | PHLPPL    |
| 0.002815119 | stable | EID1      |
| 0.002817045 | stable | LOC442421 |
| 0.002817045 | stable | C19ORF53  |
| 0.002823511 | stable | RPL26L1   |
| 0.002825336 | stable | HELZ      |
| 0.002825506 | stable | CD36      |
| 0.002845064 | stable | RAB33B    |
| 0.002861055 | stable | LOC285016 |
| 0.002864475 | stable | C3ORF21   |
| 0.002873342 | stable | ABHD14B   |
| 0.002875251 | stable | ENPP4     |
| 0.002881847 | stable | SFXN2     |
| 0.002892268 | stable | TIMM8A    |
| 0.002892885 | stable | ABLIM1    |
| 0.002895219 | stable | GPR83     |
| 0.002896511 | stable | PIF1      |
| 0.002897008 | stable | BCAT2     |
| 0.00290149  | stable | COL27A1   |
| 0.002903623 | stable | LOC647326 |
| 0.002908065 | stable | PEX11B    |
| 0.002912065 | stable | C10ORF58  |
| 0.002916244 | stable | MALL      |
| 0.002933679 | stable | PIPSL     |
| 0.002934854 | stable | SMO       |
| 0.00293777  | stable | KBTBD11   |

DEG.infomation

|             |        |           |
|-------------|--------|-----------|
| 0.002962125 | stable | MGC33846  |
| 0.002967656 | stable | CRIM1     |
| 0.002968788 | stable | JMJD5     |
| 0.002978909 | stable | LARGE     |
| 0.00298245  | stable | PEX13     |
| 0.002982595 | stable | MAP6D1    |
| 0.003000713 | stable | UNC50     |
| 0.003009552 | stable | RABL2B    |
| 0.003014046 | stable | KIAA0363  |
| 0.00301637  | stable | HOXB7     |
| 0.003019752 | stable | COIL      |
| 0.003028373 | stable | ZBBX      |
| 0.003028373 | stable | RPA3      |
| 0.003028958 | stable | CDS1      |
| 0.00303044  | stable | LOC643011 |
| 0.003030968 | stable | GOLGA2    |
| 0.003057167 | stable | SMC6      |
| 0.003068607 | stable | PCOLCE2   |
| 0.003068752 | stable | METT10D   |
| 0.003069594 | stable | PSME3     |
| 0.003073504 | stable | TTC18     |
| 0.003078531 | stable | AFF4      |
| 0.00308092  | stable | SR140     |
| 0.003083579 | stable | ZNF573    |
| 0.00308502  | stable | C12ORF10  |
| 0.003085397 | stable | FEZ2      |
| 0.003091222 | stable | ANKRD50   |
| 0.003097054 | stable | SYNJ2BP   |
| 0.003097412 | stable | BTBD12    |
| 0.003108812 | stable | SS18      |
| 0.003114605 | stable | RHOA      |
| 0.00311847  | stable | LOC643509 |
| 0.003127956 | stable | PAN3      |
| 0.00313065  | stable | GTF2H1    |
| 0.003139121 | stable | DHPS      |
| 0.003150407 | stable | ODF3L2    |
| 0.003150407 | stable | LOC731777 |
| 0.003153696 | stable | EEA1      |
| 0.003155649 | stable | CFL2      |
| 0.003162012 | stable | HSPB1     |
| 0.00316272  | stable | TTF2      |
| 0.00316272  | stable | FAM127B   |
| 0.003164646 | stable | LOC136143 |
| 0.003166983 | stable | OGN       |
| 0.003168866 | stable | BACE2     |
| 0.003174357 | down   | FGF12     |
| 0.003178801 | stable | FGFR1     |
| 0.003180952 | stable | LOC649169 |
| 0.003183845 | stable | SLC22A16  |
| 0.003192851 | stable | MGAT2     |
| 0.003199748 | stable | LOC730092 |

DEG.infomation

|             |        |           |
|-------------|--------|-----------|
| 0.00321783  | stable | ST14      |
| 0.00321783  | stable | PLD1      |
| 0.003247963 | stable | POU5F1P1  |
| 0.003249342 | stable | TNIP2     |
| 0.003255212 | stable | UCP2      |
| 0.003269702 | stable | SLC35A5   |
| 0.003276628 | stable | MGC12966  |
| 0.003279668 | stable | HLA-DOB   |
| 0.003279668 | stable | ZNF432    |
| 0.003282084 | stable | CTR9      |
| 0.003289959 | stable | ZNF513    |
| 0.003294247 | stable | SLC16A4   |
| 0.003296074 | stable | ITPKB     |
| 0.003296306 | stable | CHST1     |
| 0.003300474 | stable | SPARCL1   |
| 0.003304168 | stable | HSDL2     |
| 0.003305568 | stable | LIG3      |
| 0.003313251 | stable | PLOD1     |
| 0.003315595 | stable | ZNF260    |
| 0.003315595 | stable | PHLDA2    |
| 0.003315595 | stable | QDPR      |
| 0.003324566 | stable | C3ORF64   |
| 0.003344626 | stable | GHDC      |
| 0.003371723 | stable | NOL12     |
| 0.003377401 | stable | PCBP3     |
| 0.003393277 | stable | ATRNL1    |
| 0.003396755 | stable | RSBN1L    |
| 0.003400119 | stable | ARHGEF4   |
| 0.003406198 | stable | RGN       |
| 0.003407922 | stable | ZNF585A   |
| 0.003414544 | stable | PHF2      |
| 0.00341483  | stable | LGI1      |
| 0.003420951 | stable | CASP7     |
| 0.003422669 | stable | COPG2     |
| 0.003425727 | stable | CSHL1     |
| 0.00343246  | stable | ALG2      |
| 0.003448779 | stable | TSPAN18   |
| 0.003452491 | stable | FTSJD1    |
| 0.003457814 | stable | LOC654174 |
| 0.003468809 | stable | PSAT1     |
| 0.003470245 | stable | RAB12     |
| 0.003476973 | stable | DEPDC1B   |
| 0.003479672 | stable | KIAA0513  |
| 0.003490001 | stable | SOX8      |
| 0.003491193 | stable | ARHGAP30  |
| 0.003492778 | stable | FAM39E    |
| 0.003498111 | stable | VIT       |
| 0.003503662 | stable | HIST2H4A  |
| 0.00351505  | stable | PCIF1     |
| 0.00351505  | stable | C1ORF170  |
| 0.00352457  | stable | EBF1      |

## DEG.infomation

|             |        |           |
|-------------|--------|-----------|
| 0.00352457  | stable | MARCH1    |
| 0.003545969 | stable | ANXA6     |
| 0.003552302 | stable | ECT2      |
| 0.003554597 | stable | SETD1B    |
| 0.003559644 | stable | PSMA4     |
| 0.003568477 | stable | LYG1      |
| 0.003572375 | stable | C1GALT1   |
| 0.003581623 | stable | MSR1      |
| 0.003587249 | stable | SLC26A9   |
| 0.003609007 | stable | CCDC21    |
| 0.003611205 | stable | SF3A3     |
| 0.003611381 | stable | TRIM47    |
| 0.003612174 | stable | LOC346887 |
| 0.003612174 | stable | NXF1      |
| 0.003618277 | stable | PIP3-E    |
| 0.003619581 | stable | LOC653884 |
| 0.003649585 | stable | CR1       |
| 0.003654675 | stable | MGP       |
| 0.003654675 | stable | PLAC8     |
| 0.0036557   | stable | DIS3L     |
| 0.0036557   | stable | UBL3      |
| 0.003657373 | stable | CCDC56    |
| 0.003670808 | stable | NTN1      |
| 0.003672634 | stable | C1ORF97   |
| 0.003681975 | stable | CCL23     |
| 0.003681975 | stable | KIAA0859  |
| 0.003701152 | stable | EAF2      |
| 0.003702708 | stable | PJA1      |
| 0.003703042 | stable | CRELD1    |
| 0.003703042 | stable | LOC652671 |
| 0.003704272 | stable | GART      |
| 0.003713468 | stable | LOC339879 |
| 0.003725935 | stable | LOC644584 |
| 0.003726996 | stable | RIN3      |
| 0.003728307 | stable | LOC283547 |
| 0.003731807 | stable | IMPA2     |
| 0.003733122 | stable | LRRRC33   |
| 0.003737905 | stable | EID2B     |
| 0.003738157 | stable | CLN3      |
| 0.003742    | stable | RBM22     |
| 0.003749582 | stable | RNF217    |
| 0.003752399 | stable | LRRRC28   |
| 0.003755754 | stable | TERC      |
| 0.003757912 | stable | LPPR2     |
| 0.003763014 | stable | HLA-DQA1  |
| 0.003763312 | stable | ZNF32     |
| 0.003764702 | stable | CNOT7     |
| 0.003778338 | stable | MED28     |
| 0.003785863 | stable | LOC554203 |
| 0.003791785 | stable | TGM2      |
| 0.003796613 | stable | TCP11L2   |



## DEG.infomation

|             |        |           |
|-------------|--------|-----------|
| 0.003800484 | stable | DTNA      |
| 0.003802914 | stable | PIGA      |
| 0.003806043 | stable | YIPF5     |
| 0.003815053 | stable | SLC29A2   |
| 0.003815738 | stable | SFRS7     |
| 0.003826821 | stable | LOC642197 |
| 0.003829183 | stable | LOC648366 |
| 0.003841367 | stable | ITGA9     |
| 0.003854906 | stable | RNF40     |
| 0.003854906 | stable | PELO      |
| 0.003855805 | stable | LOC440345 |
| 0.003856361 | stable | COG3      |
| 0.003860502 | stable | PROSAPIP1 |
| 0.00386133  | stable | KPNA1     |
| 0.003869153 | stable | TTC26     |
| 0.0038728   | stable | PALB2     |
| 0.0038728   | stable | TRPV1     |
| 0.003877561 | stable | KIAA1407  |
| 0.003886731 | stable | SOLH      |
| 0.003898394 | stable | RPL22     |
| 0.003898836 | stable | CRSP6     |
| 0.003906303 | stable | CDT1      |
| 0.003930916 | stable | HRB       |
| 0.0039533   | stable | EPST11    |
| 0.003962184 | stable | SNTB1     |
| 0.003965043 | stable | LRP10     |
| 0.003970043 | stable | LOC131873 |
| 0.003971053 | stable | CCDC127   |
| 0.003985936 | stable | IGFBP6    |
| 0.003992852 | stable | PNMA1     |
| 0.004008166 | stable | C9ORF40   |
| 0.004008556 | stable | ETV4      |
| 0.004014822 | stable | PSME1     |
| 0.004025551 | stable | NPSR1     |
| 0.004026549 | stable | PARP10    |
| 0.004033139 | stable | ZBED1     |
| 0.004037869 | stable | FLJ38482  |
| 0.004038587 | stable | IRF9      |
| 0.004065869 | stable | LOC400657 |
| 0.004066912 | stable | RPAP3     |
| 0.004071169 | stable | PCSK6     |
| 0.004078273 | stable | BRD4      |
| 0.004079419 | stable | FEZ1      |
| 0.004086066 | stable | SMARCC2   |
| 0.004094129 | stable | C1ORF85   |
| 0.004099235 | stable | LOC647958 |
| 0.004100695 | stable | DPP9      |
| 0.004120216 | stable | C16ORF75  |
| 0.004120216 | stable | PABPN1    |
| 0.004120216 | stable | ALKBH5    |
| 0.004128461 | stable | MYO1C     |

## DEG.infomation

|             |        |           |
|-------------|--------|-----------|
| 0.004129478 | stable | HLA-F     |
| 0.004133778 | stable | RAD51     |
| 0.004137245 | stable | LOC644852 |
| 0.004138789 | stable | C21ORF33  |
| 0.004139848 | stable | SP3       |
| 0.004158281 | stable | MRPS21    |
| 0.004187322 | stable | KIF13A    |
| 0.004210633 | stable | CALCOCO1  |
| 0.004213404 | stable | MPI       |
| 0.004215027 | stable | KLHL20    |
| 0.004217117 | stable | GUCY1A3   |
| 0.004234418 | stable | RPAP1     |
| 0.004238531 | stable | IRAK4     |
| 0.004239393 | stable | POLR3A    |
| 0.004250885 | stable | C3ORF70   |
| 0.00425101  | stable | GPR160    |
| 0.004258994 | stable | CCNE2     |
| 0.004291148 | stable | BMP2K     |
| 0.00430008  | stable | LDHB      |
| 0.004305869 | stable | NDUFAF2   |
| 0.004305869 | stable | PSMC4     |
| 0.004312216 | stable | AQR       |
| 0.004321024 | stable | EIF3EIP   |
| 0.004321357 | stable | SCG5      |
| 0.004344456 | stable | PMS2L1    |
| 0.004351439 | stable | MAN1A2    |
| 0.004355771 | stable | CUGBP1    |
| 0.004381154 | stable | NUSAP1    |
| 0.004381942 | stable | LOC389033 |
| 0.004384031 | stable | VIM       |
| 0.004386125 | stable | PRNP      |
| 0.004389582 | stable | PXT1      |
| 0.004389582 | stable | KIAA0367  |
| 0.004389582 | stable | NBEA      |
| 0.004389582 | stable | C21ORF128 |
| 0.004393191 | stable | PPP1R3B   |
| 0.00440628  | stable | ICAM3     |
| 0.004410292 | stable | RAN       |
| 0.004416853 | stable | HYOU1     |
| 0.004431117 | stable | PPP3CB    |
| 0.004439663 | stable | GGA1      |
| 0.004440775 | stable | KIAA1211  |
| 0.004443318 | stable | HFM1      |
| 0.00444524  | stable | RTN3      |
| 0.00447258  | stable | PCDH17    |
| 0.004473626 | stable | MGC3207   |
| 0.004487426 | stable | DCTN2     |
| 0.004493326 | stable | KLK11     |
| 0.004494771 | stable | LOC653602 |
| 0.004497866 | stable | TNK2      |
| 0.004499271 | stable | NUAK1     |

## DEG.infomation

|             |        |           |
|-------------|--------|-----------|
| 0.004499271 | stable | SEZ6L     |
| 0.004503729 | stable | ANKRD12   |
| 0.0045042   | stable | SNHG11    |
| 0.004512464 | stable | MRPL16    |
| 0.004515788 | stable | C14ORF172 |
| 0.004525106 | stable | FLJ44124  |
| 0.004535035 | stable | TMEM38A   |
| 0.004541323 | stable | SFRS12    |
| 0.004545183 | stable | PDGFB     |
| 0.00454799  | stable | SHCBP1    |
| 0.00454799  | stable | PALM      |
| 0.004551937 | stable | TROVE2    |
| 0.004558174 | stable | TP73L     |
| 0.004558174 | stable | PRDM11    |
| 0.004559064 | stable | CACHD1    |
| 0.004563398 | stable | USP9X     |
| 0.004582298 | stable | ZNF649    |
| 0.004582602 | stable | LOC283683 |
| 0.004589342 | stable | EDA       |
| 0.004592054 | stable | C9ORF30   |
| 0.004600401 | stable | FAIM      |
| 0.004607543 | stable | TP53RK    |
| 0.004612452 | stable | ETFA      |
| 0.00461601  | stable | FLNA      |
| 0.004618168 | stable | ZNF85     |
| 0.00461982  | stable | ITGAV     |
| 0.004620155 | stable | FTHL7     |
| 0.004620155 | stable | SEMA6C    |
| 0.004622057 | stable | PTPRN2    |
| 0.00463491  | stable | ZNF518B   |
| 0.004636118 | stable | ZSWIM4    |
| 0.004637705 | stable | TMF1      |
| 0.004637705 | stable | RN7SL1    |
| 0.004644864 | stable | OSBPL7    |
| 0.004644864 | stable | CD34      |
| 0.004656393 | stable | TRAPPC6B  |
| 0.004660912 | stable | RALY      |
| 0.004668464 | stable | TBC1D19   |
| 0.004674605 | stable | CHRNA5    |
| 0.004675419 | stable | MPPED2    |
| 0.004697879 | stable | RPL12     |
| 0.004698145 | stable | SEMA4C    |
| 0.004712096 | stable | RABGGTA   |
| 0.004716613 | stable | VASP      |
| 0.00471851  | stable | PTGS2     |
| 0.004724695 | stable | SNORD100  |
| 0.004724695 | stable | MBD6      |
| 0.004736483 | stable | KIAA1553  |
| 0.00474977  | stable | ZNF165    |
| 0.004754382 | stable | GGPS1     |
| 0.004780843 | stable | MGC33556  |

DEG.infomation

|             |        |           |
|-------------|--------|-----------|
| 0.004782278 | stable | NRCAM     |
| 0.004782278 | stable | XTP3TPA   |
| 0.004795041 | stable | MTIF2     |
| 0.004797158 | stable | IL1RAP    |
| 0.004798513 | stable | ARHGEF11  |
| 0.004799391 | stable | MAP1S     |
| 0.004828172 | stable | PACSIN1   |
| 0.004841097 | stable | CSE1L     |
| 0.004868084 | stable | EVI2A     |
| 0.004885826 | stable | ZNF772    |
| 0.00488961  | stable | C12ORF5   |
| 0.004900574 | stable | HOOK2     |
| 0.004923066 | stable | RGS10     |
| 0.004923066 | stable | LRRN4CL   |
| 0.004933784 | stable | PLA2G5    |
| 0.004937396 | stable | IQCC      |
| 0.004937396 | stable | LOC134466 |
| 0.004937396 | stable | PRPF18    |
| 0.004941385 | stable | SPECC1L   |
| 0.004963988 | stable | HEBP1     |
| 0.004965136 | stable | OPLAH     |
| 0.004970644 | stable | HIST1H1C  |
| 0.004983973 | stable | BZW1      |
| 0.005000824 | stable | ZNF91     |
| 0.005006932 | stable | A2BP1     |
| 0.00501119  | stable | BCAP31    |
| 0.005030466 | stable | TRIP4     |
| 0.005030466 | stable | LOC653717 |
| 0.005037934 | stable | ABRA      |
| 0.00505404  | stable | LOC731366 |
| 0.00505404  | stable | SERINC1   |
| 0.005054205 | stable | LOC648570 |
| 0.005064911 | stable | CASK      |
| 0.005088592 | stable | CHCHD4    |
| 0.005089359 | stable | CUEDC1    |
| 0.005102159 | stable | CAPNS1    |
| 0.005102159 | stable | DYNLT1    |
| 0.005104243 | stable | LOC653583 |
| 0.005120717 | stable | SLC16A7   |
| 0.005123424 | stable | C1ORF54   |
| 0.005124922 | stable | TINP1     |
| 0.005132111 | stable | SNTB2     |
| 0.00513457  | stable | TSPAN3    |
| 0.00513457  | stable | FKTN      |
| 0.005160793 | stable | SUPT4H1   |
| 0.005161138 | stable | UBQLN4    |
| 0.005165864 | stable | FAT3      |
| 0.005175731 | stable | SLC30A5   |
| 0.005181839 | stable | GJC1      |
| 0.00518407  | stable | WDR43     |
| 0.005191415 | stable | ASPH      |

## DEG.infomation

|             |        |           |
|-------------|--------|-----------|
| 0.005197844 | stable | PTH2      |
| 0.005197844 | stable | APOL1     |
| 0.00522182  | stable | LAG3      |
| 0.005260269 | stable | C17ORF39  |
| 0.005261229 | stable | CTDSPL2   |
| 0.005265299 | stable | PHYHD1    |
| 0.005269726 | stable | C1ORF53   |
| 0.005274105 | stable | C4ORF42   |
| 0.005274105 | stable | GPR180    |
| 0.005275455 | stable | MYO1D     |
| 0.005275455 | stable | CCDC14    |
| 0.005279425 | stable | C20ORF7   |
| 0.005281917 | stable | TAOK1     |
| 0.005303676 | stable | LOC646574 |
| 0.005311048 | stable | CDV3      |
| 0.005311587 | stable | DACT2     |
| 0.005311587 | stable | TSG101    |
| 0.005320241 | stable | FAM83B    |
| 0.005346227 | stable | TM2D1     |
| 0.005350793 | stable | TM4SF1    |
| 0.005364926 | stable | LOC652837 |
| 0.005365469 | stable | PPM1J     |
| 0.00536554  | stable | VSIG2     |
| 0.005366714 | stable | LOC651143 |
| 0.00539305  | stable | RNF5      |
| 0.005412887 | stable | ETFB      |
| 0.005420062 | stable | C14ORF108 |
| 0.005424543 | stable | ACACB     |
| 0.005429056 | stable | STOML1    |
| 0.005434794 | stable | ASCC3     |
| 0.005441281 | stable | CD320     |
| 0.005458529 | stable | SLC19A2   |
| 0.005458529 | stable | SNORD56   |
| 0.005461849 | stable | NCOA3     |
| 0.00546196  | stable | VEGFB     |
| 0.00546539  | stable | ADH1B     |
| 0.005481013 | stable | RARS2     |
| 0.005501809 | stable | GLTPD1    |
| 0.00550637  | stable | ZNF767    |
| 0.005506793 | stable | HIST1H2BK |
| 0.005518295 | stable | EGF       |
| 0.00552262  | stable | PARD3     |
| 0.005537999 | stable | C9ORF80   |
| 0.005540556 | stable | FOXD2     |
| 0.005546264 | stable | PRRG1     |
| 0.005546973 | stable | SIGLECP3  |
| 0.005555961 | stable | ITLN1     |
| 0.00557193  | stable | PDE1B     |
| 0.005576271 | stable | FAM109B   |
| 0.005589849 | stable | FCHO2     |
| 0.005612124 | stable | LOC727849 |

## DEG.infomation

|             |        |               |
|-------------|--------|---------------|
| 0.005627464 | stable | ZNF658        |
| 0.005636586 | stable | LOC644544     |
| 0.00563696  | stable | DKFZP586H2123 |
| 0.005662705 | stable | BEAN          |
| 0.005663094 | stable | ACTR8         |
| 0.005667752 | stable | MRPL44        |
| 0.005668221 | stable | C8ORF33       |
| 0.005672302 | stable | DNAJB9        |
| 0.005693365 | stable | ISG20L2       |
| 0.00570686  | stable | MT1H          |
| 0.00570686  | stable | SH2B2         |
| 0.005711666 | stable | TAF4          |
| 0.005712665 | stable | LOC130773     |
| 0.00571648  | stable | MED10         |
| 0.005717154 | stable | TRAFD1        |
| 0.005732462 | stable | SNORD35B      |
| 0.005737589 | stable | OLFM4         |
| 0.005745508 | stable | RABEP1        |
| 0.005746148 | stable | APOO          |
| 0.005746148 | stable | FXYD2         |
| 0.005746733 | stable | C1ORF19       |
| 0.005764991 | stable | KIAA1542      |
| 0.005774471 | stable | ANGPTL2       |
| 0.005778287 | stable | EFNB2         |
| 0.005797308 | stable | MS4A2         |
| 0.005816864 | stable | HLA-DPA1      |
| 0.005821867 | stable | ZNF362        |
| 0.00582365  | stable | DLL1          |
| 0.00582667  | stable | MCM5          |
| 0.005829682 | stable | LOC653489     |
| 0.005830215 | stable | LOC401317     |
| 0.005837139 | stable | CYB5D1        |
| 0.005845833 | stable | GAS2L1        |
| 0.00585387  | stable | LOC651064     |
| 0.005864521 | stable | ZNF397        |
| 0.005888621 | stable | COPS6         |
| 0.00589668  | stable | CDRT1         |
| 0.00589996  | stable | LOC642947     |
| 0.005902988 | stable | GLT8D3        |
| 0.005920872 | stable | C3ORF59       |
| 0.00592393  | stable | INDO          |
| 0.00592393  | stable | C19ORF43      |
| 0.00593221  | stable | PCGF5         |
| 0.005935295 | stable | FIG4          |
| 0.005943601 | stable | QTRTD1        |
| 0.005946301 | stable | CTDP1         |
| 0.005957268 | stable | COL13A1       |
| 0.00596517  | stable | DYNLRB1       |
| 0.005965716 | stable | LOC648059     |
| 0.005974675 | stable | ZNF431        |
| 0.005981312 | stable | JRKL          |

DEG.infomation

|             |        |            |
|-------------|--------|------------|
| 0.005981312 | stable | ZNF747     |
| 0.00601011  | stable | CHRNA3     |
| 0.006019874 | stable | LOC286297  |
| 0.006020798 | stable | ZFYVE1     |
| 0.006022785 | stable | C17ORF71   |
| 0.00603942  | stable | MTRF1      |
| 0.006041527 | stable | LOC645888  |
| 0.006050858 | stable | SMAD7      |
| 0.006056208 | stable | ST6GALNAC6 |
| 0.006061349 | stable | HIST1H3D   |
| 0.006072547 | stable | REC8       |
| 0.006078196 | stable | CCDC117    |
| 0.006091257 | stable | LOC651790  |
| 0.006094405 | stable | GSTT2      |
| 0.006097495 | stable | FBXW7      |
| 0.006099027 | stable | AYP1P1     |
| 0.006101667 | stable | PTGDR      |
| 0.00611114  | stable | LCN1       |
| 0.006117975 | stable | ARHGEF1    |
| 0.006119138 | stable | IDH1       |
| 0.006125622 | stable | WHSC2      |
| 0.006151102 | stable | MXD4       |
| 0.00615771  | stable | LOC441196  |
| 0.006164856 | stable | KIAA0355   |
| 0.00618373  | stable | YIPF6      |
| 0.00618373  | stable | CLTB       |
| 0.006213175 | stable | MRPL4      |
| 0.006218696 | stable | SOD1       |
| 0.006226037 | stable | DEFA1      |
| 0.006228047 | stable | MAX        |
| 0.006229841 | stable | BRWD1      |
| 0.006231385 | stable | MYRIP      |
| 0.006238344 | stable | SH2B3      |
| 0.006240182 | stable | PODXL2     |
| 0.006252754 | stable | RNF135     |
| 0.006252754 | stable | C11ORF42   |
| 0.006254954 | stable | IFRD2      |
| 0.006254954 | stable | COQ7       |
| 0.006259228 | stable | SLC25A15   |
| 0.006279771 | stable | HYPK       |
| 0.006279771 | stable | WDR68      |
| 0.006292247 | stable | MCL1       |
| 0.006309396 | stable | FLYWCH1    |
| 0.00631551  | stable | LHFP       |
| 0.006325367 | stable | LTC4S      |
| 0.006325367 | stable | GLTP       |
| 0.006337777 | stable | ARMC10     |
| 0.006339886 | stable | SIGLEC9    |
| 0.00634064  | stable | SEC23IP    |
| 0.006351336 | stable | TMEM87A    |
| 0.006385824 | stable | C4ORF36    |

## DEG.infomation

|             |        |           |
|-------------|--------|-----------|
| 0.006392099 | stable | SCARF2    |
| 0.006402817 | stable | CREB3L2   |
| 0.006413843 | stable | LOC441775 |
| 0.006427636 | stable | DCBLD1    |
| 0.006430219 | stable | SOHLH2    |
| 0.006439305 | stable | RAMP2     |
| 0.006442001 | stable | MGAT4B    |
| 0.006452112 | stable | SEMA3E    |
| 0.006467894 | stable | PBLD      |
| 0.006491598 | stable | SLC25A14  |
| 0.006495728 | stable | CYP26B1   |
| 0.00650879  | stable | PPP1R3F   |
| 0.006509458 | stable | SAA1      |
| 0.006517848 | stable | LOC652672 |
| 0.006527809 | stable | PRKD1     |
| 0.006534063 | stable | C8ORFK36  |
| 0.006547404 | stable | UQCC      |
| 0.006552174 | stable | SIGLEC1   |
| 0.006583053 | stable | C19ORF28  |
| 0.006585883 | stable | RAB34     |
| 0.006587444 | stable | SCARA3    |
| 0.006633311 | stable | CKM       |
| 0.006633311 | stable | RNF215    |
| 0.006633311 | stable | ZNF823    |
| 0.006640577 | stable | FAM101B   |
| 0.006647467 | stable | HIST1H3H  |
| 0.006648197 | stable | LOC645098 |
| 0.006648197 | stable | SUPT6H    |
| 0.006648197 | stable | ZNF283    |
| 0.006648197 | stable | ERH       |
| 0.006650136 | stable | IFT57     |
| 0.0066563   | stable | RBM3      |
| 0.006656656 | stable | RPP21     |
| 0.006658625 | stable | EEF1G     |
| 0.006676064 | stable | FEM1B     |
| 0.006680078 | stable | NLRC5     |
| 0.006681968 | stable | COG4      |
| 0.006702437 | stable | LOC653650 |
| 0.006704975 | stable | VIPR1     |
| 0.006714888 | stable | KIAA0999  |
| 0.00672393  | stable | SLC19A1   |
| 0.006742919 | stable | CREBZF    |
| 0.006758604 | stable | FLJ45248  |
| 0.006767189 | stable | STARD3    |
| 0.006778634 | stable | ZNF443    |
| 0.006802708 | stable | NY-SAR-48 |
| 0.006835728 | stable | C15ORF38  |
| 0.006837367 | stable | ZBTB3     |
| 0.006844057 | stable | CCDC74A   |
| 0.006845878 | stable | TM9SF2    |
| 0.006864276 | stable | C21ORF24  |



## DEG.infomation

|             |        |           |
|-------------|--------|-----------|
| 0.006872127 | stable | PILRB     |
| 0.006874438 | stable | CNTNAP3B  |
| 0.006883336 | stable | VENTX     |
| 0.006899882 | stable | CAD       |
| 0.006911776 | stable | SIX5      |
| 0.006911776 | stable | PLAT      |
| 0.006917633 | stable | C12ORF60  |
| 0.006921707 | stable | ZNF134    |
| 0.006933788 | stable | FMNL2     |
| 0.006960849 | stable | SEPT2     |
| 0.006997602 | stable | PURB      |
| 0.007002367 | stable | BCR       |
| 0.007028284 | stable | NFIA      |
| 0.007052142 | stable | TBC1D5    |
| 0.007068482 | stable | SFRP5     |
| 0.007068482 | stable | BRCA1     |
| 0.007068482 | stable | LRRC48    |
| 0.007069294 | stable | C9ORF66   |
| 0.007077863 | stable | ACP6      |
| 0.007082404 | stable | LOC148137 |
| 0.007088271 | stable | LOC730994 |
| 0.007090871 | stable | NUDT13    |
| 0.007113481 | stable | TCP11L1   |
| 0.007122207 | stable | OR4D1     |
| 0.007122207 | stable | POP7      |
| 0.007140686 | stable | NOD1      |
| 0.007143752 | stable | LOC197350 |
| 0.007159301 | stable | PKN3      |
| 0.007164386 | stable | FREQ      |
| 0.007197811 | stable | BAT3      |
| 0.007217347 | stable | PEPD      |
| 0.007219154 | stable | NEIL2     |
| 0.007232593 | stable | TMEM132A  |
| 0.007235682 | stable | PAFAH1B2  |
| 0.007242316 | stable | OGG1      |
| 0.007242799 | stable | TNFAIP8   |
| 0.007267207 | stable | ATP13A5   |
| 0.007282506 | stable | C17ORF69  |
| 0.007297561 | stable | GPR65     |
| 0.007305444 | stable | GPR84     |
| 0.007308378 | stable | LOC643287 |
| 0.007314906 | stable | LHX2      |
| 0.007325582 | stable | FAM26F    |
| 0.007325582 | stable | KL        |
| 0.007327772 | stable | TPRKB     |
| 0.007333063 | stable | LOC729196 |
| 0.007333063 | stable | TBCB      |
| 0.007333063 | stable | MGC3032   |
| 0.00733889  | stable | HHAT      |
| 0.007363204 | stable | AIFM1     |
| 0.00736897  | stable | HGD       |

## DEG.infomation

|             |        |            |
|-------------|--------|------------|
| 0.007385062 | stable | MR1        |
| 0.007397855 | stable | PSMG2      |
| 0.007401576 | stable | SLC38A1    |
| 0.007418845 | stable | RAB9B      |
| 0.007423775 | stable | WNT5B      |
| 0.007428208 | stable | LOC205251  |
| 0.007429466 | stable | LOC375190  |
| 0.007437561 | stable | LOC401623  |
| 0.007438694 | stable | TM9SF3     |
| 0.007438694 | stable | PDK2       |
| 0.007446122 | stable | FAM8A1     |
| 0.007449033 | stable | RETN       |
| 0.007450259 | stable | ZNF628     |
| 0.007450259 | stable | FAM113A    |
| 0.007463115 | stable | IQCA1      |
| 0.007474184 | stable | LPXN       |
| 0.007486579 | stable | CXXC6      |
| 0.007486579 | stable | GAL3ST3    |
| 0.007490437 | stable | CIB1       |
| 0.007493868 | stable | C14ORF142  |
| 0.007499857 | stable | SIRPA      |
| 0.007499857 | stable | EARS2      |
| 0.007505691 | stable | CCL26      |
| 0.00753947  | stable | KLHDC5     |
| 0.0075618   | stable | ZNF652     |
| 0.007581401 | stable | MGC16703   |
| 0.007583825 | stable | ZNF367     |
| 0.007606798 | stable | GSK3A      |
| 0.007623833 | stable | CCS        |
| 0.007630888 | stable | VWA1       |
| 0.007650305 | stable | PRPF4B     |
| 0.007683986 | stable | C2ORF24    |
| 0.007684543 | stable | RAB1A      |
| 0.007712315 | stable | C12ORF43   |
| 0.007730607 | stable | ZDHHC17    |
| 0.007734211 | stable | TP53BP2    |
| 0.007734767 | stable | LOC727726  |
| 0.007743347 | stable | P2RXL1     |
| 0.007743347 | stable | MRS2       |
| 0.007759214 | stable | RPL27      |
| 0.007771397 | stable | GCHFR      |
| 0.007772485 | stable | THBD       |
| 0.007773111 | stable | DJ222E13.2 |
| 0.007781868 | stable | NGFR       |
| 0.007798627 | stable | HSD17B8    |
| 0.007799586 | stable | CHD5       |
| 0.007804602 | stable | HOXA4      |
| 0.007822699 | stable | C20ORF29   |
| 0.007839691 | stable | SLC23A2    |
| 0.007844337 | stable | LHCGR      |
| 0.007848378 | stable | PID1       |

## DEG.infomation

|             |        |           |
|-------------|--------|-----------|
| 0.007848741 | stable | MALT1     |
| 0.007851893 | stable | KLHDC1    |
| 0.007852859 | stable | KRTAP20-2 |
| 0.007856968 | stable | MIER1     |
| 0.007866361 | stable | FAM71E1   |
| 0.007866361 | stable | CHMP2B    |
| 0.007880951 | stable | AMACR     |
| 0.007905072 | stable | DUS1L     |
| 0.007908025 | stable | PHTF1     |
| 0.007937234 | stable | ADAM23    |
| 0.00795034  | stable | USF2      |
| 0.007978545 | stable | ARL5A     |
| 0.007978545 | stable | LOC441246 |
| 0.007979602 | stable | IL1RL2    |
| 0.007986146 | stable | PLXNA1    |
| 0.008031193 | stable | PLD2      |
| 0.008031193 | stable | LOC653453 |
| 0.00806675  | stable | CENPO     |
| 0.008068844 | stable | LOC652844 |
| 0.008073141 | stable | KCNS2     |
| 0.008076108 | stable | ZNF436    |
| 0.008090963 | stable | ITPA      |
| 0.008101324 | stable | GABBR1    |
| 0.008102641 | stable | ODZ3      |
| 0.008105682 | stable | CA13      |
| 0.008131557 | stable | LOC653513 |
| 0.008161461 | stable | POL3S     |
| 0.008170963 | stable | CCDC49    |
| 0.008175547 | stable | C1ORF77   |
| 0.008197032 | stable | PRAF2     |
| 0.008216071 | stable | MND1      |
| 0.008242845 | stable | C5ORF25   |
| 0.008248641 | stable | LOC643224 |
| 0.008273293 | stable | DFNB59    |
| 0.008280882 | stable | WWP2      |
| 0.008280882 | stable | NLRP8     |
| 0.008284092 | stable | LANCL2    |
| 0.008300343 | stable | SYNGAP1   |
| 0.008300343 | stable | HSN2      |
| 0.008305883 | stable | FLJ90757  |
| 0.008309041 | stable | PPP2R3B   |
| 0.008323438 | stable | CCDC81    |
| 0.008334925 | stable | CASP9     |
| 0.008344342 | stable | MBD3      |
| 0.008346861 | stable | ATP10D    |
| 0.008356629 | stable | PLAA      |
| 0.008358866 | stable | NDN       |
| 0.008366409 | stable | C3ORF17   |
| 0.008372936 | stable | TXNDC16   |
| 0.00837841  | stable | MOSC1     |
| 0.008397501 | stable | KCNA7     |

## DEG.infomation

|             |        |           |
|-------------|--------|-----------|
| 0.008409241 | stable | GLB1      |
| 0.008419559 | stable | DIP2A     |
| 0.008455394 | stable | MAK10     |
| 0.008460971 | stable | IHPK1     |
| 0.008468584 | stable | TTC19     |
| 0.008470443 | stable | GPX3      |
| 0.008474927 | stable | NDUFA9    |
| 0.008486865 | stable | XK        |
| 0.008486865 | stable | SEPHS1    |
| 0.008486865 | stable | LOC401093 |
| 0.008486865 | stable | STRN      |
| 0.008494378 | stable | ZNF599    |
| 0.00850588  | stable | CDC42     |
| 0.008509326 | stable | C9ORF78   |
| 0.00851111  | stable | PPP1R15A  |
| 0.008517535 | stable | FZD6      |
| 0.008570341 | stable | MARCH2    |
| 0.00860117  | stable | WDR47     |
| 0.00860117  | stable | GUSBL2    |
| 0.008601189 | stable | RPS19BP1  |
| 0.008622196 | stable | DNAJC25   |
| 0.008625811 | stable | AKIRIN1   |
| 0.008646436 | stable | C9ORF150  |
| 0.008646436 | stable | LOC344405 |
| 0.008649966 | stable | PRMT7     |
| 0.008675979 | stable | CIAO1     |
| 0.008689028 | stable | GARNL4    |
| 0.008706984 | stable | C2ORF42   |
| 0.008707739 | stable | PCBP1     |
| 0.008728852 | stable | XRN1      |
| 0.008733248 | stable | SARM1     |
| 0.008771833 | stable | TTC27     |
| 0.008776156 | stable | MAL       |
| 0.008828002 | stable | KIAA1324  |
| 0.008835935 | stable | PTPRO     |
| 0.008838585 | stable | NARF      |
| 0.008852023 | stable | SF3B14    |
| 0.008863581 | stable | CHD1      |
| 0.008867467 | stable | PRKAG1    |
| 0.008873676 | stable | RIMS3     |
| 0.008891682 | stable | C8ORF37   |
| 0.008891682 | stable | LOC554206 |
| 0.008896594 | stable | SLC39A10  |
| 0.008901827 | stable | C8ORF45   |
| 0.008906873 | stable | SPIN4     |
| 0.008908562 | stable | UROS      |
| 0.008915429 | stable | FHDC1     |
| 0.008926406 | stable | ARHGAP23  |
| 0.008951943 | stable | C19ORF23  |
| 0.009002157 | stable | PCDHB2    |
| 0.009035155 | stable | PHF17     |

## DEG.infomation

|             |        |            |
|-------------|--------|------------|
| 0.009048083 | stable | GALIG      |
| 0.009083474 | stable | RNF141     |
| 0.009109064 | stable | NICN1      |
| 0.009111323 | stable | MYH4       |
| 0.009140912 | stable | TMEM209    |
| 0.009156309 | stable | ACTN4      |
| 0.00918602  | stable | FVT1       |
| 0.009195314 | stable | IL4I1      |
| 0.009198506 | stable | LOC646195  |
| 0.009198506 | stable | CAMK1      |
| 0.009216645 | stable | PON2       |
| 0.009223283 | stable | KRTAP10-12 |
| 0.009243065 | stable | APOL6      |
| 0.009249709 | stable | KCNIP1     |
| 0.009249709 | stable | DHX36      |
| 0.009265729 | stable | LOC652388  |
| 0.009268537 | stable | MOSC2      |
| 0.009292232 | stable | MRPS25     |
| 0.009292232 | stable | ITIH4      |
| 0.009301977 | stable | CLDN9      |
| 0.009310753 | stable | PGBD2      |
| 0.009326358 | stable | MYO3B      |
| 0.009328592 | stable | DPM2       |
| 0.009333859 | stable | XRCC4      |
| 0.009357895 | stable | C14ORF80   |
| 0.009359557 | stable | GNAI3      |
| 0.009374031 | stable | SPTLC1     |
| 0.009378623 | stable | MGC72080   |
| 0.009398857 | stable | LOC728358  |
| 0.009439007 | stable | RNF122     |
| 0.009439007 | stable | SP140      |
| 0.009450158 | stable | SPATA20    |
| 0.009452629 | stable | SELI       |
| 0.009458285 | stable | GNAT1      |
| 0.009478571 | stable | SPHK2      |
| 0.0094811   | stable | DJ341D10.1 |
| 0.009483014 | stable | JMY        |
| 0.009490161 | stable | MAL2       |
| 0.009503516 | stable | GPI        |
| 0.009503516 | stable | ZDHHC12    |
| 0.009503516 | stable | ANGPT2     |
| 0.009511642 | stable | MTMR3      |
| 0.009563711 | stable | VBP1       |
| 0.009601764 | stable | SIAH1      |
| 0.009654814 | stable | RPL18      |
| 0.009665505 | stable | AADAACL1   |
| 0.009697993 | stable | IKBKB      |
| 0.009714664 | stable | ZW10       |
| 0.009726322 | stable | C14ORF32   |
| 0.009739433 | stable | TTC25      |
| 0.009763635 | stable | XRCC6BP1   |

## DEG.infomation

|             |        |           |
|-------------|--------|-----------|
| 0.009765626 | stable | RNASE3    |
| 0.009769057 | stable | ISYNA1    |
| 0.009792065 | stable | GLT8D1    |
| 0.009797322 | stable | RAB11A    |
| 0.009798186 | stable | HIPK1     |
| 0.009829045 | stable | ZNF720    |
| 0.009836382 | stable | UNC5B     |
| 0.009836382 | stable | RUSC1     |
| 0.009861108 | stable | BRSK1     |
| 0.009862663 | stable | TGFB2     |
| 0.009866469 | stable | TBC1D20   |
| 0.009872116 | stable | LOC730820 |
| 0.009879058 | stable | CHM       |
| 0.009879413 | stable | TYRO3     |
| 0.009879413 | stable | LGI2      |
| 0.009884022 | stable | ORAI1     |
| 0.009954421 | stable | NQO2      |
| 0.009965258 | stable | CDH15     |
| 0.01002941  | stable | ZNF276    |
| 0.010056752 | stable | KIAA1641  |
| 0.010060993 | stable | APOBEC3C  |
| 0.010088076 | stable | GBP1      |
| 0.010111446 | stable | DPH3      |
| 0.010122586 | stable | LOC441061 |
| 0.010127412 | stable | MRPL21    |
| 0.010162817 | stable | FLJ36644  |
| 0.010238764 | stable | NFKB1     |
| 0.010238864 | stable | RMND5B    |
| 0.010282471 | stable | TCEB2     |
| 0.01029308  | stable | AP3B1     |
| 0.010365058 | stable | DOK3      |
| 0.010370984 | stable | TRIM3     |
| 0.010374352 | stable | TRIM61    |
| 0.010401945 | stable | SMC2      |
| 0.010403906 | stable | ZNF394    |
| 0.010403906 | stable | PAPOLA    |
| 0.010462937 | stable | LOC731007 |
| 0.010479397 | stable | BAG4      |
| 0.010495285 | stable | LOC643396 |
| 0.010509928 | stable | LOC643872 |
| 0.010540367 | stable | LOC645688 |
| 0.010540937 | stable | LRP4      |
| 0.010546765 | stable | H2AFY2    |
| 0.010565415 | stable | FRK       |
| 0.010578187 | stable | PRICKLE4  |
| 0.010605163 | stable | LOC647195 |
| 0.010609832 | stable | LOC146517 |
| 0.010616635 | stable | LOC158301 |
| 0.010616635 | stable | PBXIP1    |
| 0.010616635 | stable | SLC25A45  |
| 0.010616635 | stable | SEC11A    |

## DEG.infomation

|             |        |           |
|-------------|--------|-----------|
| 0.010655717 | stable | TMEM33    |
| 0.010674393 | stable | TDRD1     |
| 0.01067715  | stable | ACTR10    |
| 0.010678783 | stable | EXOSC4    |
| 0.010695865 | stable | RTCD1     |
| 0.010696898 | stable | TTC30B    |
| 0.010696898 | stable | FZD3      |
| 0.010700782 | stable | LOC731002 |
| 0.010706797 | stable | ZNF589    |
| 0.010709269 | stable | ELOVL1    |
| 0.010750478 | stable | MRPL19    |
| 0.010764085 | stable | GARNL1    |
| 0.01077428  | stable | C20ORF52  |
| 0.010817127 | stable | LOC646276 |
| 0.010818768 | stable | GNG7      |
| 0.010833683 | stable | ITK       |
| 0.010846252 | stable | USP14     |
| 0.010904793 | stable | C1ORF144  |
| 0.010937857 | stable | POLR2B    |
| 0.010986024 | stable | TSFM      |
| 0.010991725 | stable | CYFIP2    |
| 0.010991725 | stable | FLJ14107  |
| 0.010997031 | stable | FAM119B   |
| 0.010997031 | stable | FADS2     |
| 0.011008583 | stable | LOC731835 |
| 0.011036463 | stable | FAM49B    |
| 0.011037639 | stable | LOC650831 |
| 0.011063287 | stable | PLS1      |
| 0.011078114 | stable | ZNF558    |
| 0.011078114 | stable | DPY19L3   |
| 0.011082045 | stable | NONO      |
| 0.011083749 | stable | CYC1      |
| 0.01109382  | stable | LOC649801 |
| 0.011098669 | stable | FRS3      |
| 0.011098669 | stable | LOC652881 |
| 0.011101087 | stable | DKC1      |
| 0.011112135 | stable | LOC732371 |
| 0.011112135 | stable | GNA12     |
| 0.01112755  | stable | CORO2A    |
| 0.011163808 | stable | OCIAD1    |
| 0.011178934 | stable | DENR      |
| 0.011214656 | stable | ZNF217    |
| 0.011236552 | stable | SPRED1    |
| 0.011249575 | stable | KIAA0753  |
| 0.011256766 | stable | SBDSP     |
| 0.011260654 | stable | MGC39584  |
| 0.011309447 | stable | SPAG1     |
| 0.011346944 | stable | LPAR1     |
| 0.011349153 | stable | KIAA1671  |
| 0.011353182 | stable | CSAD      |
| 0.011372329 | stable | ZEB2      |

## DEG.infomation

|             |        |           |
|-------------|--------|-----------|
| 0.011383915 | stable | SCNN1D    |
| 0.011392812 | stable | LARS2     |
| 0.011397425 | stable | CD84      |
| 0.011412019 | stable | LOC387762 |
| 0.011417005 | stable | UQCRC2    |
| 0.011425331 | stable | HOXB5     |
| 0.011429712 | stable | TMED4     |
| 0.011439376 | stable | FAM98A    |
| 0.011445837 | stable | DDX11     |
| 0.01144899  | stable | APM-1     |
| 0.011453816 | stable | ELOVL2    |
| 0.011453816 | stable | TEX264    |
| 0.011486464 | stable | PREP      |
| 0.011494234 | stable | GPD1      |
| 0.01149689  | stable | PABPC1    |
| 0.01150703  | stable | DAPK1     |
| 0.01151186  | stable | PMS2L3    |
| 0.011552552 | stable | GK        |
| 0.011564209 | stable | ATAD3B    |
| 0.01157522  | stable | PIGH      |
| 0.011644752 | stable | CHL1      |
| 0.011645101 | stable | MDH1      |
| 0.011645101 | stable | SSH2      |
| 0.011645101 | stable | LOC729759 |
| 0.011649001 | stable | SIGLEC7   |
| 0.011718296 | stable | ZFAND2A   |
| 0.011718296 | stable | SDHA      |
| 0.011727649 | stable | ZNF596    |
| 0.011728658 | stable | RHOD      |
| 0.011730348 | stable | SCGB1D2   |
| 0.011799687 | stable | LOC642859 |
| 0.011821126 | stable | RNF144    |
| 0.011826117 | stable | PEX11G    |
| 0.011833235 | stable | IKZF5     |
| 0.011843113 | stable | DYM       |
| 0.011852556 | stable | PPM1B     |
| 0.011899223 | stable | LOC730051 |
| 0.011939726 | stable | CREB3L4   |
| 0.011953606 | stable | HDHD2     |
| 0.011980368 | stable | TUG1      |
| 0.011980756 | stable | TNFSF8    |
| 0.011985703 | stable | FAM10A4   |
| 0.012000275 | stable | CNTN4     |
| 0.012014264 | stable | FAM168A   |
| 0.012060231 | stable | HPS5      |
| 0.012060231 | stable | INMT      |
| 0.012087394 | stable | TCF7L2    |
| 0.012099771 | stable | C18ORF26  |
| 0.012134893 | stable | LOC728888 |
| 0.012150995 | stable | ABCG5     |
| 0.012150995 | stable | GLI3      |



## DEG.infomation

|             |        |           |
|-------------|--------|-----------|
| 0.012152117 | stable | LOC152195 |
| 0.012184853 | stable | KCNQ3     |
| 0.012189893 | stable | CCDC47    |
| 0.012203733 | stable | HIVEP2    |
| 0.012203733 | stable | CALN1     |
| 0.012204555 | stable | BTNL2     |
| 0.012214622 | stable | ZNFX1     |
| 0.012262705 | stable | NAV1      |
| 0.012267657 | stable | C10ORF41  |
| 0.012272286 | stable | SENP2     |
| 0.012282137 | stable | XYLT1     |
| 0.01229321  | stable | COL4A3    |
| 0.012297838 | stable | SLC1A4    |
| 0.012338228 | stable | CACNA2D1  |
| 0.012345641 | stable | HDHD1A    |
| 0.012368006 | stable | SPIN2B    |
| 0.012375389 | stable | C1ORF58   |
| 0.012433377 | stable | MIB1      |
| 0.012437855 | stable | GIYD1     |
| 0.012469756 | stable | PUM2      |
| 0.01247908  | stable | COMMD9    |
| 0.012483024 | stable | ALS2CR12  |
| 0.012558384 | stable | LOC440731 |
| 0.012558384 | stable | LOC493754 |
| 0.012567059 | stable | PHF11     |
| 0.012570987 | stable | WTAP      |
| 0.012589217 | stable | ECHS1     |
| 0.012617786 | stable | ECHDC1    |
| 0.012617786 | stable | ABCA1     |
| 0.012620641 | stable | SLC26A6   |
| 0.012621095 | stable | RHAG      |
| 0.012644346 | stable | UGP2      |
| 0.012648342 | stable | MGC4677   |
| 0.012648359 | stable | TIE1      |
| 0.012656728 | stable | MAP1LC3A  |
| 0.012674888 | stable | ELP3      |
| 0.012693285 | stable | LOC644137 |
| 0.012765916 | stable | ARID1A    |
| 0.012782154 | stable | KIAA1715  |
| 0.012789077 | stable | RABGEF1   |
| 0.012831542 | stable | LOC441191 |
| 0.012831542 | stable | AIFM2     |
| 0.012852622 | stable | TNNC1     |
| 0.01285704  | stable | CCDC23    |
| 0.012857641 | stable | DISC1     |
| 0.012865494 | stable | ZNF593    |
| 0.012869251 | stable | NRK       |
| 0.012874684 | stable | ACTG2     |
| 0.012908366 | stable | MEOX1     |
| 0.012915947 | stable | WRNIP1    |
| 0.012947747 | stable | POT1      |

## DEG.infomation

|             |        |           |
|-------------|--------|-----------|
| 0.012957346 | stable | COL22A1   |
| 0.012959565 | stable | CDCA7L    |
| 0.012976656 | stable | RNPS1     |
| 0.01299891  | stable | LOC732075 |
| 0.013076269 | stable | FAM21C    |
| 0.013101888 | stable | TNS1      |
| 0.013113585 | stable | CCDC48    |
| 0.013134133 | stable | CXORF34   |
| 0.013154124 | stable | LOC728723 |
| 0.013188995 | stable | GPR68     |
| 0.013204665 | stable | CDKN1C    |
| 0.013216671 | stable | RABAC1    |
| 0.013321187 | stable | VAMP3     |
| 0.013330087 | stable | BUD31     |
| 0.013355831 | stable | RSAD1     |
| 0.013368892 | stable | GPKOW     |
| 0.013368892 | stable | MT1JP     |
| 0.013384381 | stable | FLJ30092  |
| 0.01343735  | stable | LRRC6     |
| 0.01343735  | stable | ZNF57     |
| 0.01343735  | stable | LOC645241 |
| 0.013526582 | stable | DNAJC9    |
| 0.013567985 | stable | HCN2      |
| 0.013579967 | stable | ERBB2IP   |
| 0.013579967 | stable | KIAA1333  |
| 0.013582117 | stable | ANGPTL5   |
| 0.013583684 | stable | RPL36A    |
| 0.013583684 | stable | AFG3L1    |
| 0.013591385 | stable | SEPT7     |
| 0.013632613 | stable | NHLRC2    |
| 0.01365742  | stable | C3ORF26   |
| 0.013659438 | stable | CABLES2   |
| 0.013668052 | stable | RNF19A    |
| 0.013687499 | stable | PHKG2     |
| 0.01369167  | stable | CRYAB     |
| 0.013695209 | stable | KIF17     |
| 0.01370149  | stable | RAVER1    |
| 0.013702973 | stable | LOC652242 |
| 0.01370447  | stable | CCR7      |
| 0.013738118 | stable | SCAMP5    |
| 0.013742912 | stable | C13ORF7   |
| 0.01374651  | stable | SYN2      |
| 0.013760814 | stable | LOC646588 |
| 0.013796553 | stable | TMEM14A   |
| 0.013800508 | stable | SEC16A    |
| 0.013800508 | stable | IQCK      |
| 0.013800508 | stable | MYST1     |
| 0.013808883 | stable | MFSD2     |
| 0.013831006 | stable | ITGA7     |
| 0.013861161 | stable | ZC3H4     |
| 0.013878511 | stable | ZBTB38    |

## DEG.infomation

|             |        |            |
|-------------|--------|------------|
| 0.013889055 | stable | SPAG8      |
| 0.013965871 | stable | PKD1L1     |
| 0.013990903 | stable | TOX4       |
| 0.014029146 | stable | DTNBP1     |
| 0.014031282 | stable | RUNX2      |
| 0.014031282 | stable | CDC42SE2   |
| 0.014031282 | stable | CYTL1      |
| 0.014043655 | stable | CTH        |
| 0.014064149 | stable | STK39      |
| 0.014100404 | stable | CD58       |
| 0.014104697 | stable | SLC16A6    |
| 0.014159078 | stable | MICALL1    |
| 0.014159078 | stable | NARG1      |
| 0.014170988 | stable | TSLP       |
| 0.014215409 | stable | FMO2       |
| 0.014272406 | stable | ATL2       |
| 0.014284784 | stable | SLC9A5     |
| 0.014370525 | stable | PTGIS      |
| 0.014382099 | stable | B3GALT4    |
| 0.0143859   | stable | LOC642443  |
| 0.014422043 | stable | TST        |
| 0.014430719 | stable | DGUOK      |
| 0.014439351 | stable | C6ORF142   |
| 0.014457949 | stable | KIAA1881   |
| 0.014466905 | stable | PTP4A1     |
| 0.014472028 | stable | FARSA      |
| 0.014478185 | stable | CSGALNACT2 |
| 0.01450441  | stable | MGC2752    |
| 0.014518109 | stable | SMOX       |
| 0.014559461 | stable | FGFR4      |
| 0.014559461 | stable | SCRG1      |
| 0.014581708 | stable | LOC647450  |
| 0.014588887 | stable | PLEKHO2    |
| 0.014658819 | stable | LOC642393  |
| 0.014676005 | stable | NEUROG2    |
| 0.014712379 | stable | EXTL2      |
| 0.014718949 | stable | PCTK3      |
| 0.014768919 | stable | LOC644511  |
| 0.014770787 | stable | LOC651285  |
| 0.014800274 | stable | PPTC7      |
| 0.014847424 | stable | KPNB1      |
| 0.014852802 | stable | LOC401218  |
| 0.014874055 | stable | LOC647677  |
| 0.014933896 | stable | KIAA0652   |
| 0.014949524 | stable | LCP2       |
| 0.014954587 | stable | XG         |
| 0.014971562 | stable | RMND5A     |
| 0.014986471 | stable | ATXN2      |
| 0.015129111 | stable | DPP4       |
| 0.015161787 | stable | NR3C1      |
| 0.015235704 | stable | LOC642423  |

## DEG.infomation

|             |        |           |
|-------------|--------|-----------|
| 0.015239869 | stable | C16ORF13  |
| 0.015251086 | stable | DNAJC2    |
| 0.01525779  | stable | LOC641700 |
| 0.015281885 | stable | CDAN1     |
| 0.015312672 | stable | BLZF1     |
| 0.015346169 | stable | TBX1      |
| 0.015391632 | stable | MAPKAP1   |
| 0.015415832 | stable | NR4A1     |
| 0.015437443 | stable | ANKRD44   |
| 0.015447353 | stable | C21ORF81  |
| 0.015458448 | stable | SYTL4     |
| 0.015462334 | stable | GNS       |
| 0.015462379 | stable | RBKS      |
| 0.015477844 | stable | CRMP1     |
| 0.015513267 | stable | STARD5    |
| 0.01552852  | stable | FLT1      |
| 0.015601175 | stable | FLJ20699  |
| 0.015601175 | stable | USP25     |
| 0.015601175 | stable | LAMC3     |
| 0.015603166 | stable | HSPB3     |
| 0.015660174 | stable | ZNF614    |
| 0.015680899 | stable | SELK      |
| 0.015715666 | stable | CYP4V2    |
| 0.015715807 | stable | NRGN      |
| 0.0157574   | stable | ACBD3     |
| 0.015785509 | stable | LOC644670 |
| 0.01581432  | stable | PRKAR1A   |
| 0.015867459 | stable | DEDD      |
| 0.015931277 | stable | TBP       |
| 0.015931277 | stable | RG9MTD3   |
| 0.015946681 | stable | ZC3H7A    |
| 0.015950598 | stable | LOC650128 |
| 0.015950598 | stable | LOC646609 |
| 0.015954422 | stable | ADPRHL2   |
| 0.016015492 | stable | C9        |
| 0.01601673  | stable | ZWILCH    |
| 0.016033411 | stable | C20ORF72  |
| 0.016033411 | stable | TSPAN5    |
| 0.016033514 | stable | RUNDC1    |
| 0.016104879 | stable | RAB37     |
| 0.016110573 | stable | JMJD2A    |
| 0.016110573 | stable | CNTROB    |
| 0.016110573 | stable | HPDL      |
| 0.016150842 | stable | MGC3731   |
| 0.016155214 | stable | FLJ44112  |
| 0.016193531 | stable | KIAA0746  |
| 0.01622028  | stable | RFWD3     |
| 0.016241763 | stable | PPARA     |
| 0.016251694 | stable | TRIM25    |
| 0.016252423 | stable | SLC22A15  |
| 0.016253589 | stable | FAM110A   |

## DEG.infomation

|             |        |           |
|-------------|--------|-----------|
| 0.016256735 | stable | WRN       |
| 0.01626041  | stable | DPYSL3    |
| 0.016261466 | stable | LOC651337 |
| 0.016294857 | stable | NADSYN1   |
| 0.016295478 | stable | GPATCH2   |
| 0.016298442 | stable | CENPQ     |
| 0.016336918 | stable | CST6      |
| 0.016343635 | stable | PLEKHM2   |
| 0.016343635 | stable | HNRPK     |
| 0.016343635 | stable | NUDT4P1   |
| 0.016361561 | stable | GORASP1   |
| 0.016363176 | stable | TMED2     |
| 0.016374223 | stable | RNF111    |
| 0.016384322 | stable | NCOA5     |
| 0.016384322 | stable | USP16     |
| 0.016420742 | stable | FGF13     |
| 0.016434457 | stable | STX7      |
| 0.016434457 | stable | NUDT12    |
| 0.016434816 | stable | MAP7D3    |
| 0.0164405   | stable | SUMO1P3   |
| 0.0164405   | stable | BAPX1     |
| 0.0164405   | stable | C1ORF156  |
| 0.016441211 | stable | CTAGE5    |
| 0.016441547 | stable | PSMA5     |
| 0.016444278 | stable | NAGLU     |
| 0.01645837  | stable | CRYGS     |
| 0.016464191 | stable | C6ORF89   |
| 0.016477187 | stable | TMPRSS13  |
| 0.016520368 | stable | SERPINF2  |
| 0.016520368 | stable | ACAT2     |
| 0.016521684 | stable | NEU4      |
| 0.016590467 | stable | CROCC     |
| 0.016634326 | stable | C5ORF28   |
| 0.016642472 | stable | DNASE1L3  |
| 0.016673461 | stable | LOC651872 |
| 0.016675026 | stable | TFEB      |
| 0.016676115 | stable | ALDOC     |
| 0.016700155 | stable | C13ORF25  |
| 0.016711585 | stable | NOC4L     |
| 0.016734975 | stable | FOXO1     |
| 0.016762935 | stable | CSDA      |
| 0.016766334 | stable | LOC653438 |
| 0.016768915 | stable | LOC643310 |
| 0.016779776 | stable | LOC730272 |
| 0.016790542 | stable | ARRDC4    |
| 0.016858906 | stable | TRAPPC6A  |
| 0.016877515 | stable | DEFB122   |
| 0.016970492 | stable | ARFGEF1   |
| 0.016970492 | stable | FAM104A   |
| 0.017000614 | stable | OSBPL1A   |
| 0.017016181 | stable | MFSD8     |

DEG.infomation

|             |        |           |
|-------------|--------|-----------|
| 0.017016181 | stable | TNRC6B    |
| 0.017037205 | stable | CAPG      |
| 0.017055867 | stable | LOC283050 |
| 0.017064255 | stable | DGKI      |
| 0.017075388 | stable | C20ORF59  |
| 0.017075388 | stable | HDAC8     |
| 0.017084949 | stable | LOC648852 |
| 0.017121643 | stable | LOC153364 |
| 0.017134921 | stable | RFX2      |
| 0.017146234 | stable | PLIN      |
| 0.017146234 | stable | CYB5R2    |
| 0.017147067 | stable | OSBP      |
| 0.017154746 | stable | LOC388654 |
| 0.017164736 | stable | KCNG1     |
| 0.017164736 | stable | LRRC40    |
| 0.017169311 | stable | CCL7      |
| 0.017170396 | stable | OPHN1     |
| 0.017171911 | stable | PRPS1     |
| 0.017203    | stable | LMO4      |
| 0.017209889 | stable | LOXL3     |
| 0.017230242 | stable | ROCK2     |
| 0.017254128 | stable | ZNF250    |
| 0.017257612 | stable | NGFRAP1   |
| 0.017287259 | stable | LOC645013 |
| 0.017300091 | stable | ERP29     |
| 0.017313589 | stable | EEF1D     |
| 0.017320872 | stable | ING2      |
| 0.017361623 | stable | HEMK1     |
| 0.017370076 | stable | DMD       |
| 0.017391072 | stable | EPB41L1   |
| 0.017395884 | stable | CSNK1A1   |
| 0.017410529 | stable | UFD1L     |
| 0.017418305 | stable | NFX1      |
| 0.017420802 | stable | LOC441763 |
| 0.01749621  | stable | LOC642477 |
| 0.01749621  | stable | TOP3B     |
| 0.017508218 | stable | RPS21     |
| 0.017508218 | stable | LOC652489 |
| 0.017630029 | stable | GRIK2     |
| 0.017630029 | stable | PPP1R12A  |
| 0.017644054 | stable | C4ORF34   |
| 0.017650014 | stable | C22ORF28  |
| 0.017653024 | stable | FLJ10996  |
| 0.017664447 | stable | ASB10     |
| 0.017664447 | stable | SAP130    |
| 0.017670039 | stable | AFAP1L2   |
| 0.017699888 | stable | RRP7A     |
| 0.017703569 | stable | PRRT1     |
| 0.017709163 | stable | DNAJC28   |
| 0.0177248   | stable | TM2D2     |
| 0.017763383 | stable | PPP1R15B  |

DEG.infomation

|             |        |           |
|-------------|--------|-----------|
| 0.017763719 | stable | PDCD2     |
| 0.017763719 | stable | LOC649509 |
| 0.017773519 | stable | ARMC1     |
| 0.017799148 | stable | RMND1     |
| 0.017841344 | stable | OLFML1    |
| 0.017854403 | stable | TMTC4     |
| 0.017877195 | stable | CSN1S2A   |
| 0.017883606 | stable | SMPX      |
| 0.017898904 | stable | C6ORF72   |
| 0.017914897 | stable | CDC34     |
| 0.017921211 | stable | ZNF768    |
| 0.017935648 | stable | ACTR2     |
| 0.017938841 | stable | MRPL34    |
| 0.01796992  | stable | CXORF26   |
| 0.017987424 | stable | IPPK      |
| 0.017991739 | stable | RELL2     |
| 0.018003209 | stable | UBE4A     |
| 0.018004382 | stable | APTX      |
| 0.018004382 | stable | FAM116A   |
| 0.018021124 | stable | AKR1B10   |
| 0.018043427 | stable | LMTK3     |
| 0.018050724 | stable | LOC646109 |
| 0.018109035 | stable | MON2      |
| 0.018123425 | stable | VTI1B     |
| 0.018123425 | stable | DPYD      |
| 0.018130253 | stable | TAPT1     |
| 0.018161916 | stable | WDR77     |
| 0.018169553 | stable | SNORD38A  |
| 0.018223704 | stable | RNASEH2A  |
| 0.018250079 | stable | FIGN      |
| 0.018260321 | stable | RPS27     |
| 0.018260321 | stable | KCNMB1    |
| 0.018286716 | stable | KIF3C     |
| 0.018295108 | stable | FBXO6     |
| 0.018372689 | stable | EPM2AIP1  |
| 0.018442006 | stable | AOF2      |
| 0.018513807 | stable | CLEC12A   |
| 0.018564885 | stable | ADAM22    |
| 0.018625468 | stable | EIF4B     |
| 0.01863518  | stable | HNRNPD    |
| 0.018683732 | stable | TRAF3IP1  |
| 0.018699901 | stable | CD82      |
| 0.01870432  | stable | CLCNKB    |
| 0.018748255 | stable | LOC652264 |
| 0.018748255 | stable | NSFL1C    |
| 0.018751213 | stable | ATP13A2   |
| 0.018783093 | stable | ZNF501    |
| 0.018826983 | stable | SSX4B     |
| 0.018878517 | stable | ITM2C     |
| 0.01890285  | stable | LOC730358 |
| 0.019006796 | stable | UBQLN2    |

## DEG.infomation

|             |        |           |
|-------------|--------|-----------|
| 0.019017347 | stable | IFT74     |
| 0.019037373 | stable | HNRNPH2   |
| 0.019072928 | stable | C7ORF47   |
| 0.01907456  | stable | LOC642816 |
| 0.019082343 | stable | LOC650037 |
| 0.019111765 | stable | KLHL2     |
| 0.019140451 | stable | RBM14     |
| 0.019140451 | stable | C8ORF32   |
| 0.019144707 | stable | TAF1B     |
| 0.019160719 | stable | KATNAL1   |
| 0.019162197 | stable | TF        |
| 0.019185996 | stable | NES       |
| 0.019217168 | stable | HBZ       |
| 0.019223379 | stable | BOC       |
| 0.019232449 | stable | SLC25A17  |
| 0.019289972 | stable | CSPG4LYP1 |
| 0.019324783 | stable | OBFC1     |
| 0.019347043 | stable | CLIC4     |
| 0.01938478  | stable | RAD54B    |
| 0.019421945 | stable | ELMOD2    |
| 0.019432336 | stable | RNF5P1    |
| 0.019437815 | stable | COL5A1    |
| 0.019530252 | stable | RNF19B    |
| 0.019607109 | stable | PSMC3     |
| 0.019615815 | stable | GOLGB1    |
| 0.019621288 | stable | C11ORF63  |
| 0.019640755 | stable | TMEM194   |
| 0.019710184 | stable | C1ORF96   |
| 0.019807944 | stable | AKR1B1    |
| 0.019829696 | stable | ANKRD24   |
| 0.019917982 | stable | PDE4C     |
| 0.019963904 | stable | P4HA1     |
| 0.019992697 | stable | WBSCR17   |
| 0.020012146 | stable | SEC22A    |
| 0.020023498 | stable | CHX10     |
| 0.020043023 | stable | LOC644029 |
| 0.020061467 | stable | PGAM5     |
| 0.020061467 | stable | SNORD43   |
| 0.020078545 | stable | IMMP2L    |
| 0.020089497 | stable | MCF2L2    |
| 0.020093303 | stable | GAMT      |
| 0.0201873   | stable | MYH3      |
| 0.0201873   | stable | PGM3      |
| 0.0201873   | stable | WDR18     |
| 0.02022615  | stable | C3ORF55   |
| 0.020230834 | stable | LOC388002 |
| 0.020248094 | stable | TXNRD1    |
| 0.020252779 | stable | C9ORF3    |
| 0.020258215 | stable | N-PAC     |
| 0.020264893 | stable | FLJ45337  |
| 0.0203291   | stable | DAB2IP    |



## DEG.infomation

|             |        |             |
|-------------|--------|-------------|
| 0.020337754 | stable | ZNF479      |
| 0.020350485 | stable | LDHD        |
| 0.02035737  | stable | POMP        |
| 0.020382329 | stable | TMEM143     |
| 0.020409996 | stable | LRRC58      |
| 0.020421696 | stable | OR1M1       |
| 0.02042588  | stable | HOXA5       |
| 0.020444625 | stable | YIPF7       |
| 0.020449642 | stable | RELA        |
| 0.020460269 | stable | PTPN2       |
| 0.020542516 | stable | RASA1       |
| 0.020545154 | stable | ARHGAP21    |
| 0.020546074 | stable | FAM116B     |
| 0.020632082 | stable | LOC407835   |
| 0.020632082 | stable | LOC653119   |
| 0.020680827 | down   | C6          |
| 0.020741704 | stable | ENTPD4      |
| 0.0207797   | stable | RFESD       |
| 0.0207797   | stable | CHIC1       |
| 0.020789271 | stable | TAS2R9      |
| 0.020803814 | stable | PLEKHA1     |
| 0.020807613 | stable | DZIP3       |
| 0.020830003 | stable | SNRPE       |
| 0.02083385  | stable | PITRM1      |
| 0.02083385  | stable | PALM2-AKAP2 |
| 0.020836949 | stable | USP7        |
| 0.020844709 | stable | CCDC109A    |
| 0.020855671 | stable | HSBP1       |
| 0.020857555 | stable | TNCRNA      |
| 0.020932886 | stable | CLOCK       |
| 0.0209365   | stable | C17ORF81    |
| 0.0209365   | stable | ALDH3A2     |
| 0.0209365   | stable | SLC2A9      |
| 0.0209365   | stable | UNC13B      |
| 0.020943319 | stable | SLC35B1     |
| 0.020947331 | stable | LOC387841   |
| 0.021021844 | stable | NOC2L       |
| 0.021023329 | stable | SNF1LK2     |
| 0.021047486 | stable | CD48        |
| 0.021081131 | stable | IGF2BP3     |
| 0.021081131 | stable | TTC38       |
| 0.021084436 | stable | DUSP18      |
| 0.021086473 | stable | NFATC1      |
| 0.021092941 | stable | FANCI       |
| 0.021122712 | stable | HOXB4       |
| 0.021122712 | stable | PXDN        |
| 0.021139494 | stable | ZNF213      |
| 0.021151752 | stable | FBXW2       |
| 0.02115309  | stable | GPR126      |
| 0.021158185 | stable | SP2         |
| 0.021158185 | stable | NF2         |

## DEG.infomation

|             |        |           |
|-------------|--------|-----------|
| 0.021193985 | stable | HLA-A     |
| 0.021207886 | stable | LOC285033 |
| 0.021294736 | stable | C21ORF123 |
| 0.021316481 | stable | C16ORF68  |
| 0.021379068 | stable | GIMAP6    |
| 0.021400502 | stable | TOM1L2    |
| 0.021424999 | stable | GATA5     |
| 0.021435056 | stable | KCNT1     |
| 0.021439454 | stable | LOC653291 |
| 0.021488321 | stable | LOC729446 |
| 0.021506799 | stable | LOC650251 |
| 0.021516425 | stable | LOC285216 |
| 0.021523878 | stable | LYL1      |
| 0.021568008 | stable | MRPS12    |
| 0.021568008 | stable | TIAM1     |
| 0.021578143 | stable | KCNF1     |
| 0.021594161 | stable | EXT2      |
| 0.021642137 | stable | SEC61A2   |
| 0.021692091 | stable | RTF1      |
| 0.021714421 | stable | NME2      |
| 0.021722925 | stable | RNF7      |
| 0.021777139 | stable | SPIRE2    |
| 0.021782017 | stable | LOC653907 |
| 0.021825196 | stable | DEFB107A  |
| 0.021848665 | stable | ZNF26     |
| 0.021926849 | stable | ARRDC5    |
| 0.02193495  | stable | LOC647570 |
| 0.021943668 | stable | TRIM28    |
| 0.021990462 | stable | KLF10     |
| 0.022029386 | stable | RCN2      |
| 0.022039776 | stable | ZFP36L1   |
| 0.022078074 | stable | ZDHHC14   |
| 0.022083779 | stable | KRT8      |
| 0.022083779 | stable | PRKRIR    |
| 0.022090096 | stable | PRND      |
| 0.022121798 | stable | NEK3      |
| 0.022130618 | stable | SPINK1    |
| 0.02213332  | stable | FAM73A    |
| 0.02213332  | stable | SLC25A46  |
| 0.022133435 | stable | BUB1      |
| 0.022166048 | stable | CDR2      |
| 0.022258925 | stable | LOC653147 |
| 0.022284385 | stable | DDX51     |
| 0.022372239 | stable | SESTD1    |
| 0.022374346 | stable | ZCCHC14   |
| 0.022389646 | stable | ODC1      |
| 0.022441373 | stable | TTMA      |
| 0.022498852 | stable | GPR89C    |
| 0.022500725 | stable | PHLPP     |
| 0.022501774 | stable | HSD17B4   |
| 0.022511692 | stable | RPUSD4    |

## DEG.infomation

|             |        |           |
|-------------|--------|-----------|
| 0.022530951 | stable | C21ORF55  |
| 0.022571826 | stable | LOC643356 |
| 0.022610194 | stable | FLJ11292  |
| 0.022717019 | stable | COMMD4    |
| 0.022740446 | stable | STXBP1    |
| 0.022854503 | stable | TMIE      |
| 0.022894484 | stable | TRPC6     |
| 0.022913698 | stable | XKR8      |
| 0.022952644 | stable | GDF9      |
| 0.022957501 | stable | PPM1E     |
| 0.022957501 | stable | MYO7A     |
| 0.022973377 | stable | NPPC      |
| 0.023008847 | stable | LOC728006 |
| 0.02303058  | stable | PPARD     |
| 0.023133287 | stable | NUP35     |
| 0.023138698 | up     | NPPA      |
| 0.023150856 | stable | C1ORF159  |
| 0.023208157 | stable | KRTCAP3   |
| 0.023208157 | stable | LTV1      |
| 0.02327331  | stable | FGF11     |
| 0.023278124 | stable | BAD       |
| 0.023278124 | stable | SNURF     |
| 0.023309467 | stable | ELMO3     |
| 0.023312249 | stable | PRLH      |
| 0.023326978 | stable | CREB3L3   |
| 0.023355072 | stable | ZNF225    |
| 0.023376394 | stable | CALHM2    |
| 0.023409492 | stable | UBXN4     |
| 0.023410559 | stable | SETD4     |
| 0.023423536 | stable | ZNF775    |
| 0.023429281 | stable | NANOS3    |
| 0.023438562 | stable | FUT6      |
| 0.023447929 | stable | MGC27345  |
| 0.023448215 | stable | CAMTA1    |
| 0.02353447  | stable | NUDCD1    |
| 0.02355206  | stable | EBAG9     |
| 0.02355206  | stable | C3ORF39   |
| 0.023555832 | stable | RILP      |
| 0.02357301  | stable | C18ORF56  |
| 0.023575461 | stable | ZNF384    |
| 0.023575461 | stable | CD200R2   |
| 0.023575461 | stable | ZNF69     |
| 0.023588856 | stable | CDC14B    |
| 0.023629753 | stable | STRN4     |
| 0.023671097 | stable | WWC3      |
| 0.023689875 | stable | CORO2B    |
| 0.023726352 | stable | S100A2    |
| 0.023779169 | stable | FHOD1     |
| 0.023791972 | stable | CLSTN1    |
| 0.023811119 | stable | PDCL3     |
| 0.023814687 | stable | RHBDL2    |

## DEG.infomation

|             |        |               |
|-------------|--------|---------------|
| 0.023861847 | stable | LOC642277     |
| 0.023942916 | stable | LOC646667     |
| 0.024034226 | stable | MTMR11        |
| 0.024085088 | stable | LOC388282     |
| 0.02409508  | stable | TMEM128       |
| 0.024106786 | stable | OR2A9P        |
| 0.024106786 | stable | FEM1A         |
| 0.024135996 | stable | PLGLA         |
| 0.024136456 | stable | NISCH         |
| 0.024163604 | stable | FLJ40473      |
| 0.024203996 | stable | DGKA          |
| 0.024214222 | stable | RUNDC2C       |
| 0.024277122 | stable | TNFSF15       |
| 0.02438802  | stable | TSPO          |
| 0.024413071 | stable | GRIP2         |
| 0.024428821 | stable | C21ORF62      |
| 0.024435911 | stable | FKSG24        |
| 0.024509613 | stable | CXORF36       |
| 0.024523741 | stable | MGC15763      |
| 0.024548461 | stable | ACSS1         |
| 0.02458316  | stable | MTMR12        |
| 0.024620641 | stable | ZNF184        |
| 0.024651185 | stable | NDUFS3        |
| 0.02467809  | stable | SCPEP1        |
| 0.02470698  | stable | CD302         |
| 0.02473997  | stable | KCNJ12        |
| 0.024786986 | stable | GPR89B        |
| 0.024817341 | stable | IGSF3         |
| 0.024831812 | stable | CHCHD3        |
| 0.024932901 | stable | RBM45         |
| 0.024932901 | stable | MTR           |
| 0.02494729  | stable | STXBP5        |
| 0.02494729  | stable | ANGEL2        |
| 0.0249545   | stable | C3ORF36       |
| 0.024967178 | stable | LOC727909     |
| 0.025049979 | stable | TXNDC9        |
| 0.025091218 | stable | KCNMB2        |
| 0.025096367 | stable | C1ORF71       |
| 0.025131378 | stable | TM2D3         |
| 0.025142845 | stable | LOC644961     |
| 0.02521494  | stable | C8ORF44       |
| 0.02523293  | stable | DSCR5         |
| 0.025244076 | stable | MARCH3        |
| 0.025244076 | stable | NAB2          |
| 0.025250417 | stable | C15ORF23      |
| 0.025256164 | stable | PPEF1         |
| 0.025340397 | stable | ISL1          |
| 0.025352009 | stable | LOC646019     |
| 0.025369378 | stable | MCEE          |
| 0.02539281  | stable | DKFZP451M2119 |
| 0.025428188 | stable | LOC728492     |

## DEG.infomation

|             |        |            |
|-------------|--------|------------|
| 0.025437658 | stable | TRAF3IP2   |
| 0.025482218 | stable | FIBCD1     |
| 0.025483464 | stable | LOC641693  |
| 0.02550409  | stable | LOC652773  |
| 0.025540967 | stable | FANCC      |
| 0.025558216 | stable | LOC644935  |
| 0.025605767 | stable | AADAT      |
| 0.025605937 | stable | ORC6L      |
| 0.025625704 | stable | C4ORF39    |
| 0.025635446 | stable | C17ORF49   |
| 0.02564641  | stable | ZC3H8      |
| 0.025656008 | stable | WRB        |
| 0.025668369 | stable | TAF8       |
| 0.025668369 | stable | NCAN       |
| 0.025696027 | stable | TRIM27     |
| 0.025699965 | stable | PDCD10     |
| 0.025714627 | stable | LOC644537  |
| 0.025714627 | stable | TIMP3      |
| 0.025718804 | stable | MAGMAS     |
| 0.025718804 | stable | B2M        |
| 0.025726024 | stable | RAD51C     |
| 0.025763845 | stable | RQCD1      |
| 0.025763845 | stable | FGFR1OP2   |
| 0.025848417 | stable | CTSA       |
| 0.025852221 | stable | ZNF264     |
| 0.025863913 | stable | LOC391771  |
| 0.02600496  | stable | ST6GALNAC1 |
| 0.026050871 | stable | RRN3       |
| 0.026056529 | stable | SYP        |
| 0.02615082  | stable | C22ORF32   |
| 0.026176851 | stable | APOB       |
| 0.026210722 | stable | LOC646119  |
| 0.026224785 | stable | FBXO34     |
| 0.026224785 | stable | NIP30      |
| 0.026244173 | stable | EZH2       |
| 0.026244173 | stable | ARL6       |
| 0.026325935 | stable | LOC399900  |
| 0.026394761 | stable | SH3YL1     |
| 0.026429256 | stable | PMCH       |
| 0.026433676 | stable | MPEG1      |
| 0.026469067 | stable | KLF13      |
| 0.026488028 | stable | GRPEL2     |
| 0.026562484 | stable | C3ORF30    |
| 0.026582776 | stable | C5ORF42    |
| 0.026585283 | stable | ATAD2      |
| 0.026696854 | stable | RBM4       |
| 0.026696854 | stable | ARL3       |
| 0.026700581 | stable | C14ORF94   |
| 0.026722596 | stable | MRPL14     |
| 0.026730422 | stable | LOC648706  |
| 0.026736539 | stable | ZNF322A    |

DEG.infomation

|             |        |           |
|-------------|--------|-----------|
| 0.026798979 | stable | UBL5      |
| 0.026834282 | stable | SERPINF1  |
| 0.026851338 | stable | C1QTNF6   |
| 0.02685869  | stable | USP3      |
| 0.026864883 | stable | TMEM66    |
| 0.026874459 | stable | LOC641896 |
| 0.026907984 | stable | MYLIP     |
| 0.026907984 | stable | DOT1L     |
| 0.026912888 | stable | PHF14     |
| 0.026976828 | stable | SEL1L     |
| 0.027038922 | stable | ARHGAP26  |
| 0.027114368 | stable | RPUSD2    |
| 0.027114368 | stable | LOC439957 |
| 0.027114368 | stable | TMEM136   |
| 0.027128261 | stable | TIMM17B   |
| 0.027128759 | stable | CNOT10    |
| 0.027158013 | stable | C16ORF86  |
| 0.027204003 | stable | SSX5      |
| 0.027233646 | stable | LOC646317 |
| 0.027233646 | stable | PRPS2     |
| 0.027262387 | stable | CENPJ     |
| 0.027278277 | stable | ACTR1A    |
| 0.027329975 | stable | VAPB      |
| 0.027480121 | stable | TMTC2     |
| 0.027543578 | stable | XPOT      |
| 0.027587987 | stable | LPCAT2    |
| 0.027599418 | stable | ACOX3     |
| 0.027615284 | stable | CRTAC1    |
| 0.027615284 | stable | KCNH2     |
| 0.027652674 | stable | ORMDL2    |
| 0.02765528  | stable | KIF9      |
| 0.027686013 | stable | UTP11L    |
| 0.027705728 | stable | IWS1      |
| 0.027720549 | stable | C6ORF120  |
| 0.027731843 | stable | LOC388181 |
| 0.027741363 | stable | ADH1C     |
| 0.027741909 | stable | FLRT3     |
| 0.027749143 | stable | TRIM21    |
| 0.02778958  | stable | MRPS34    |
| 0.02778958  | stable | C9ORF116  |
| 0.027798294 | stable | WDR61     |
| 0.027819721 | stable | CCR5      |
| 0.027848794 | stable | C6ORF222  |
| 0.027848794 | stable | ZNF227    |
| 0.027866404 | stable | C19ORF25  |
| 0.027976813 | stable | PIK3AP1   |
| 0.028072932 | stable | HIST1H2BC |
| 0.028092649 | stable | MAPK8IP1  |
| 0.028107903 | stable | TRNAU1AP  |
| 0.028108205 | stable | BCAS3     |
| 0.028108205 | stable | REEP5     |

## DEG.infomation

|             |        |           |
|-------------|--------|-----------|
| 0.028114391 | stable | APBA2BP   |
| 0.028139013 | stable | KLRB1     |
| 0.028142749 | stable | ERCC3     |
| 0.028156117 | stable | LOC652634 |
| 0.028202248 | stable | SFXN5     |
| 0.028269589 | stable | BRMS1L    |
| 0.028291088 | stable | PITPNM2   |
| 0.028354443 | stable | LOC654260 |
| 0.028443068 | stable | GPR137B   |
| 0.028451935 | stable | IFIT5     |
| 0.028451935 | stable | ZNF154    |
| 0.028451935 | stable | RIF1      |
| 0.028451935 | stable | LOC728844 |
| 0.028451935 | stable | LOC648695 |
| 0.028451935 | stable | HDAC4     |
| 0.028486501 | stable | DYNLT3    |
| 0.028543777 | stable | MDM4      |
| 0.028543777 | stable | DHX30     |
| 0.028543777 | stable | P2RY8     |
| 0.028551019 | stable | BAIAP2    |
| 0.028624217 | stable | P2RY14    |
| 0.028629656 | stable | AP2A2     |
| 0.028813895 | stable | LOC144983 |
| 0.028826014 | stable | ZNF608    |
| 0.028853097 | stable | STARD3NL  |
| 0.028884434 | stable | ZNF555    |
| 0.028908616 | stable | TFPT      |
| 0.028908616 | stable | NDUFV3    |
| 0.028976238 | stable | PIP5K2A   |
| 0.02900434  | stable | TTL5      |
| 0.029019353 | stable | SKIV2L2   |
| 0.029072048 | stable | PHF20L1   |
| 0.029072048 | stable | NT5C1A    |
| 0.029110184 | stable | CKB       |
| 0.029150718 | stable | SAA2      |
| 0.029164205 | stable | LCAT      |
| 0.02917364  | stable | PRAM1     |
| 0.029206704 | stable | NCOA1     |
| 0.029226261 | stable | HISPPD2A  |
| 0.02923091  | stable | JAM2      |
| 0.02932282  | stable | AGPAT2    |
| 0.029362274 | stable | F12       |
| 0.029369363 | stable | ACIN1     |
| 0.029382056 | stable | NOL11     |
| 0.029391743 | stable | MMS19L    |
| 0.029392416 | stable | INPP5B    |
| 0.029435397 | stable | DAG1      |
| 0.029473096 | stable | ANKRD9    |
| 0.029511808 | stable | LOC642678 |
| 0.029523106 | stable | FAHD2A    |
| 0.029524074 | stable | MAPKAPK5  |

DEG.infomation

|             |        |           |
|-------------|--------|-----------|
| 0.029600387 | stable | ZNF519    |
| 0.029610181 | stable | OPN1MW    |
| 0.029654474 | stable | SUMO2     |
| 0.02967784  | stable | C21ORF56  |
| 0.029687261 | stable | PCMT1     |
| 0.029695958 | stable | C19ORF47  |
| 0.029705793 | stable | CKS1B     |
| 0.029781976 | stable | LOC649555 |
| 0.029809005 | stable | TXNL4A    |
| 0.029817314 | stable | EWSR1     |
| 0.029828556 | stable | KIAA1704  |
| 0.029851191 | stable | LEP       |
| 0.029985024 | stable | DEF8      |
| 0.030034167 | stable | PPFIBP1   |
| 0.030081087 | stable | ZDHHC24   |
| 0.030113329 | stable | CEP170    |
| 0.030171139 | stable | RAE1      |
| 0.030225868 | stable | ATOH8     |
| 0.030263078 | stable | SNAPIN    |
| 0.030301555 | stable | MKX       |
| 0.030321022 | stable | SLC7A6OS  |
| 0.030355017 | stable | CNNM3     |
| 0.030425112 | stable | OR4P4     |
| 0.030468789 | stable | PDE6C     |
| 0.030471152 | stable | CDK5RAP3  |
| 0.030483721 | stable | ABCC4     |
| 0.030497609 | stable | PIGM      |
| 0.030506153 | stable | PPM2C     |
| 0.030537605 | stable | DYNLL1    |
| 0.03053879  | stable | LOC654042 |
| 0.030540413 | stable | FBXO28    |
| 0.030651785 | stable | PHF8      |
| 0.030678452 | stable | GGA2      |
| 0.030678452 | stable | MMP16     |
| 0.030695185 | stable | TASP1     |
| 0.030751568 | stable | LOC647543 |
| 0.030751568 | stable | ARRB2     |
| 0.030768752 | stable | LOC643242 |
| 0.030768752 | stable | ELFN2     |
| 0.030786128 | stable | KIAA0241  |
| 0.030795054 | stable | SUCLG1    |
| 0.030871429 | stable | OR2Y1     |
| 0.03088838  | stable | ELN       |
| 0.030894063 | stable | NARS2     |
| 0.030908402 | stable | AGPAT3    |
| 0.030908402 | stable | LBH       |
| 0.03091025  | stable | C6ORF204  |
| 0.030979767 | stable | TRIM55    |
| 0.030979767 | stable | RAB3GAP1  |
| 0.030988108 | stable | CPSF2     |
| 0.031001892 | stable | PHC3      |



## DEG.infomation

|             |        |           |
|-------------|--------|-----------|
| 0.031009517 | stable | LOC643668 |
| 0.031016389 | stable | LRMP      |
| 0.031081211 | stable | SELL      |
| 0.031097205 | stable | ANKRD28   |
| 0.031097778 | stable | C10ORF4   |
| 0.031124745 | stable | NIPA1     |
| 0.031173528 | stable | SIP1      |
| 0.031213377 | stable | C20ORF45  |
| 0.031243278 | stable | USP33     |
| 0.03134852  | stable | OR56B4    |
| 0.031356948 | stable | EIF3G     |
| 0.031452484 | stable | SELENBP1  |
| 0.031480065 | stable | TMEM60    |
| 0.03148061  | stable | LOC442060 |
| 0.031511618 | stable | BCL7C     |
| 0.031512176 | stable | LOC647766 |
| 0.031514955 | stable | TP53AP1   |
| 0.031551106 | stable | SCGB1D1   |
| 0.031551106 | stable | VWA5A     |
| 0.031613258 | stable | MRAS      |
| 0.031620601 | stable | SP5       |
| 0.031622843 | stable | RNASEH2B  |
| 0.03165068  | stable | FLJ23152  |
| 0.03170493  | stable | C10ORF47  |
| 0.031758239 | stable | GIPC1     |
| 0.031766041 | stable | THUMPD1   |
| 0.031766041 | stable | PDIA2     |
| 0.031826841 | stable | ABCD3     |
| 0.031850443 | stable | RBAK      |
| 0.031858398 | stable | DDX1      |
| 0.031933113 | stable | LOC651546 |
| 0.03197979  | stable | PARN      |
| 0.032055363 | stable | TSPAN31   |
| 0.032070302 | stable | LOC728944 |
| 0.032102567 | stable | KCND2     |
| 0.032102567 | stable | LOC389257 |
| 0.03212473  | stable | EBP       |
| 0.03212473  | stable | LOC96597  |
| 0.032154266 | stable | ACTR1B    |
| 0.03216791  | stable | EIF3J     |
| 0.032171878 | stable | PTGIR     |
| 0.032244517 | stable | KY        |
| 0.03224503  | stable | ALDH2     |
| 0.032247467 | stable | TTY5      |
| 0.032285146 | stable | LOC145837 |
| 0.032334783 | stable | GKAP1     |
| 0.032398582 | stable | BTBD15    |
| 0.032418566 | stable | RBBP8     |
| 0.032540394 | stable | AES       |
| 0.032549657 | stable | LOC644336 |
| 0.032550228 | stable | UTP15     |

## DEG.infomation

|             |        |           |
|-------------|--------|-----------|
| 0.032551653 | stable | KLHL22    |
| 0.032552568 | stable | CCDC3     |
| 0.032624559 | stable | FLJ46358  |
| 0.032658315 | stable | SLC20A2   |
| 0.032725692 | stable | PNPT1     |
| 0.032742863 | stable | ST3GAL4   |
| 0.032742863 | stable | RANBP6    |
| 0.032750762 | stable | SLC25A40  |
| 0.032750762 | stable | C1QTNF9   |
| 0.032790164 | stable | LOC642372 |
| 0.032835136 | stable | HDAC1     |
| 0.032853659 | stable | CPEB2     |
| 0.032873763 | stable | FLOT1     |
| 0.032875059 | stable | XKR6      |
| 0.032929267 | stable | ZNF364    |
| 0.032998258 | stable | DERPC     |
| 0.033019311 | stable | TRA1P2    |
| 0.03302107  | stable | DDX54     |
| 0.033026533 | stable | SCN4B     |
| 0.033062472 | stable | LRRC59    |
| 0.033071187 | stable | TMOD4     |
| 0.033087677 | stable | ICOS      |
| 0.033155072 | stable | YWHAB     |
| 0.033191885 | stable | PCDH19    |
| 0.033191885 | stable | DNAJC5G   |
| 0.033191885 | stable | C22ORF36  |
| 0.033191885 | stable | LOC648399 |
| 0.033238279 | stable | NR0B2     |
| 0.033239219 | stable | MID1      |
| 0.033247758 | stable | AFF1      |
| 0.033294032 | stable | LOC650369 |
| 0.033318869 | stable | PSMA2     |
| 0.033372077 | stable | FBN3      |
| 0.033379242 | stable | KLRG2     |
| 0.033386411 | stable | TLE3      |
| 0.033411697 | stable | SSRP1     |
| 0.033438759 | stable | C6ORF150  |
| 0.033463329 | stable | PIWIL4    |
| 0.033486413 | stable | GTF2IRD2P |
| 0.033487971 | stable | WNK1      |
| 0.033496669 | stable | SPHAR     |
| 0.033530432 | stable | SHOX2     |
| 0.033561007 | stable | LOC643431 |
| 0.033599998 | stable | MPP4      |
| 0.033608117 | stable | HS3ST3A1  |
| 0.03362821  | stable | LOC402057 |
| 0.033648015 | stable | ADAM8     |
| 0.033665096 | stable | WWP1      |
| 0.033665096 | stable | LOC653182 |
| 0.033744684 | stable | LOC90586  |
| 0.033764023 | stable | DEFA3     |

## DEG.infomation

|             |        |           |
|-------------|--------|-----------|
| 0.033890502 | stable | HRCT1     |
| 0.034014715 | stable | MFSD3     |
| 0.034017217 | stable | SLC28A2   |
| 0.034029667 | stable | RPL13L    |
| 0.034077123 | stable | GPBP1     |
| 0.034117252 | stable | NAV2      |
| 0.034134245 | stable | TRIM74    |
| 0.034152804 | stable | EIF4H     |
| 0.034184895 | stable | EXOC3     |
| 0.034220262 | stable | DDX31     |
| 0.034230207 | stable | CLCN2     |
| 0.034243752 | stable | SFRS15    |
| 0.034278495 | stable | ACP5      |
| 0.034282239 | stable | LYSMD2    |
| 0.034282239 | stable | NXF2B     |
| 0.034300648 | stable | PPIG      |
| 0.034436972 | stable | PGA4      |
| 0.034534735 | stable | C19ORF50  |
| 0.034558449 | stable | BZW2      |
| 0.034653465 | stable | MOXD1     |
| 0.034677748 | stable | PARP4     |
| 0.034717776 | stable | PDZRN4    |
| 0.03472257  | stable | ANKRD11   |
| 0.034747308 | stable | ADAMTS13  |
| 0.034769678 | stable | DNAI2     |
| 0.034787987 | stable | REL       |
| 0.034797241 | stable | C22ORF39  |
| 0.034805505 | stable | CADM3     |
| 0.034879764 | stable | MAP2K2    |
| 0.034904644 | stable | PA2G4     |
| 0.035035605 | stable | CHD1L     |
| 0.035035605 | stable | ATP5F1    |
| 0.03509444  | stable | FAM49A    |
| 0.035151803 | stable | NARS      |
| 0.035171735 | stable | FBXO5     |
| 0.035176402 | stable | ZHX2      |
| 0.035188459 | stable | LOC644538 |
| 0.035274579 | stable | APPL2     |
| 0.035324922 | stable | HIGD1B    |
| 0.035327444 | stable | AFTPH     |
| 0.035440761 | stable | RIPK5     |
| 0.03546982  | stable | NOVA1     |
| 0.035470253 | stable | DACT1     |
| 0.035540468 | stable | CLCNKA    |
| 0.035554672 | stable | KIAA1571  |
| 0.035724936 | stable | PABPC5    |
| 0.035737958 | stable | FTH1      |
| 0.035742489 | stable | SPOP      |
| 0.035745632 | stable | LGALS3BP  |
| 0.035755402 | stable | PARK2     |
| 0.035755823 | stable | CDC14A    |

DEG.infomation

|             |        |           |
|-------------|--------|-----------|
| 0.035765531 | stable | LOC23117  |
| 0.035778135 | stable | PPP2R1A   |
| 0.035839739 | stable | GNB2L1    |
| 0.035852588 | stable | ARSD      |
| 0.035852588 | stable | LOC644251 |
| 0.035865673 | stable | EXOSC1    |
| 0.035865673 | stable | FLII      |
| 0.03586647  | stable | PRKCI     |
| 0.035912694 | stable | LMO2      |
| 0.035933047 | stable | NF1       |
| 0.035955468 | stable | LOC652493 |
| 0.036030662 | stable | SLC44A4   |
| 0.036054873 | stable | C16ORF53  |
| 0.036054873 | stable | YES1      |
| 0.036085311 | stable | GNAI1     |
| 0.036085311 | stable | FLRT2     |
| 0.036156406 | stable | NKIRAS2   |
| 0.036156406 | stable | TMEM110   |
| 0.036214472 | stable | PRKAB1    |
| 0.036214554 | stable | PRTFDC1   |
| 0.036245438 | stable | RBCK1     |
| 0.036396601 | stable | CREB3     |
| 0.036399788 | stable | TAZ       |
| 0.036402549 | stable | ULK2      |
| 0.036402549 | stable | LOC648710 |
| 0.036503887 | stable | BRE       |
| 0.036505167 | stable | PPP1R13B  |
| 0.036507266 | stable | PLA2G4F   |
| 0.036521725 | stable | RND3      |
| 0.036571258 | stable | PSMA3     |
| 0.036699412 | stable | ANKRD10   |
| 0.036703266 | stable | PAIP1     |
| 0.036810944 | stable | LCOR      |
| 0.036826176 | stable | LRP1B     |
| 0.036826176 | stable | RHOXF1    |
| 0.036853797 | stable | FAM100B   |
| 0.036869173 | stable | GANC      |
| 0.036869173 | stable | LOC652479 |
| 0.036869173 | stable | DNMT3B    |
| 0.036930602 | stable | SLC5A7    |
| 0.036950718 | stable | FN3K      |
| 0.03695852  | stable | GCC1      |
| 0.036965163 | stable | C11ORF82  |
| 0.036969408 | stable | SOX9      |
| 0.037032758 | stable | LOC441179 |
| 0.037041784 | stable | PRPSAP2   |
| 0.037075736 | stable | PI3       |
| 0.037077664 | stable | ZNF251    |
| 0.037104108 | stable | WSB1      |
| 0.037154788 | stable | FRAP1     |
| 0.037171027 | stable | MEN1      |

DEG.infomation

|             |        |           |
|-------------|--------|-----------|
| 0.037185436 | stable | ATRIP     |
| 0.037225833 | stable | TGFB3     |
| 0.037242674 | stable | PAPOLG    |
| 0.037471005 | stable | JAG1      |
| 0.037476186 | stable | LOC644530 |
| 0.037476186 | stable | KIF1B     |
| 0.037497173 | stable | SORBS3    |
| 0.037498683 | stable | EHMT1     |
| 0.037522696 | stable | ASPA      |
| 0.037537167 | stable | NOMO2     |
| 0.037541813 | stable | CAST      |
| 0.037567768 | stable | TMEM22    |
| 0.037577632 | stable | LOC642578 |
| 0.037606381 | stable | SERBP1    |
| 0.037753601 | stable | SAR1B     |
| 0.037753601 | stable | RPS17     |
| 0.037856751 | stable | C16ORF62  |
| 0.037972282 | stable | PRRT3     |
| 0.037972282 | stable | COX6C     |
| 0.038008702 | stable | UBE2I     |
| 0.038091036 | stable | BPHL      |
| 0.038143752 | stable | FLJ32154  |
| 0.038175001 | stable | SH3BP1    |
| 0.038216287 | stable | B3GNT6    |
| 0.038250787 | stable | LOC150223 |
| 0.038333099 | stable | RPRD1A    |
| 0.038333099 | stable | LOC493869 |
| 0.038340592 | stable | ID2       |
| 0.038357484 | stable | LSM8      |
| 0.03841656  | stable | PRDM16    |
| 0.038518456 | stable | ZNF533    |
| 0.038581435 | stable | PHKA1     |
| 0.038656406 | stable | PSMA7     |
| 0.03867079  | stable | AMDHD1    |
| 0.038671985 | stable | TMSB4X    |
| 0.038738246 | stable | PHIP      |
| 0.038855644 | stable | ITPKA     |
| 0.038917852 | stable | TWF1      |
| 0.038942146 | stable | SFRS1     |
| 0.038988053 | stable | TMED10    |
| 0.038988053 | stable | RANBP3    |
| 0.039005017 | stable | TMCO6     |
| 0.039041322 | stable | RPLP2     |
| 0.039068452 | stable | LOC642398 |
| 0.03916218  | stable | NPFFR2    |
| 0.039279687 | stable | SMAD3     |
| 0.039322499 | stable | RNPEP     |
| 0.039349361 | stable | NPTX1     |
| 0.039360071 | stable | ZNF155    |
| 0.039401318 | stable | LOC649711 |
| 0.039472121 | stable | LOC649209 |

## DEG.infomation

|             |        |               |
|-------------|--------|---------------|
| 0.039516142 | stable | PDCD2L        |
| 0.039551888 | stable | KCNG2         |
| 0.039673644 | stable | POLE          |
| 0.039692683 | stable | LOC644466     |
| 0.039693661 | stable | GCK           |
| 0.039704687 | stable | LOC645683     |
| 0.039712181 | stable | GAPVD1        |
| 0.039839497 | stable | LOC730360     |
| 0.039878948 | stable | BUD13         |
| 0.039878948 | stable | PPA2          |
| 0.039884648 | stable | CA5B          |
| 0.039951316 | stable | FBLN5         |
| 0.039970376 | stable | LOC641710     |
| 0.039971108 | stable | DNAJB1        |
| 0.039976961 | stable | ETNK2         |
| 0.039996891 | stable | C7ORF28A      |
| 0.040031577 | stable | LOC646342     |
| 0.040039205 | stable | SLC35C1       |
| 0.040057622 | stable | FLJ20160      |
| 0.040057622 | stable | ABO           |
| 0.040164712 | stable | MTA3          |
| 0.040238071 | stable | FCRL1         |
| 0.040277793 | stable | WASF2         |
| 0.040351073 | stable | GYG1          |
| 0.040378201 | stable | ADRA2C        |
| 0.040387426 | stable | RASGRP1       |
| 0.040442043 | stable | SIM2          |
| 0.040560568 | stable | GPR132        |
| 0.040644669 | stable | CCNC          |
| 0.040770388 | stable | C1ORF210      |
| 0.040791447 | stable | TICAM2        |
| 0.040791447 | stable | GP1BA         |
| 0.040870753 | stable | ATP8B4        |
| 0.040896425 | stable | MSTP9         |
| 0.040980832 | stable | CCDC59        |
| 0.040999678 | stable | GTF2A2        |
| 0.041015035 | stable | AAA1          |
| 0.041054668 | stable | POLM          |
| 0.041056998 | stable | ZC3HAV1       |
| 0.041065236 | stable | ASGR1         |
| 0.041090257 | stable | DCTN5         |
| 0.041101116 | stable | FANCD2        |
| 0.041101116 | stable | KIAA1797      |
| 0.041178916 | stable | ZCCHC8        |
| 0.041178916 | stable | LOC645600     |
| 0.041183565 | stable | DKFZP761P0423 |
| 0.041185741 | stable | SAP30L        |
| 0.041192465 | stable | ZBTB20        |
| 0.041272079 | stable | MUSK          |
| 0.04129246  | stable | BAT5          |
| 0.041316967 | stable | LOC648099     |

DEG.infomation

|             |        |           |
|-------------|--------|-----------|
| 0.041317321 | stable | ANKRD43   |
| 0.041330811 | stable | C1ORF26   |
| 0.041332355 | stable | BBS5      |
| 0.041364277 | stable | C9ORF58   |
| 0.041417547 | stable | PTPN13    |
| 0.04143668  | stable | LOC401052 |
| 0.041451199 | stable | ZNF193    |
| 0.041464233 | stable | CTCF      |
| 0.041472312 | stable | FARSB     |
| 0.041522421 | stable | AMDHD2    |
| 0.04153401  | stable | OR51B2    |
| 0.04156248  | stable | MLX       |
| 0.041566939 | stable | S100A1    |
| 0.041567602 | stable | MAGEA6    |
| 0.041657564 | stable | MELK      |
| 0.041788078 | stable | DOC2B     |
| 0.041823762 | stable | FAM44B    |
| 0.041850105 | stable | TMEM59    |
| 0.041850207 | stable | PTGFR     |
| 0.041877581 | stable | ERO1L     |
| 0.041877581 | stable | LOC149837 |
| 0.042032645 | stable | LOC400721 |
| 0.042213554 | stable | N4BP1     |
| 0.042233788 | stable | TCF12     |
| 0.042296814 | stable | TGFBRAP1  |
| 0.042302107 | stable | LOC652699 |
| 0.042302107 | stable | LOC646900 |
| 0.042341506 | stable | PRKCE     |
| 0.042362068 | stable | LILRB1    |
| 0.042368233 | stable | NEK8      |
| 0.042415591 | stable | CBWD6     |
| 0.042436456 | stable | EIF5      |
| 0.042436456 | stable | GATC      |
| 0.042440238 | stable | LOC347376 |
| 0.042465027 | stable | LOXL4     |
| 0.042465027 | stable | PCTP      |
| 0.042477284 | stable | LOC730077 |
| 0.042533952 | stable | CES4      |
| 0.042565336 | stable | LOC642660 |
| 0.042571201 | stable | METTL3    |
| 0.042631978 | stable | FLJ32252  |
| 0.042654799 | stable | C17ORF48  |
| 0.042733945 | stable | SLC35E1   |
| 0.042796304 | stable | SHC4      |
| 0.042806014 | stable | EMX1      |
| 0.042997351 | stable | C10ORF39  |
| 0.043001836 | stable | CAPN7     |
| 0.043001836 | stable | HSD17B11  |
| 0.043017494 | stable | MDM2      |
| 0.043021142 | stable | EPS15     |
| 0.043030586 | stable | RPL27A    |

## DEG.infomation

|             |        |             |
|-------------|--------|-------------|
| 0.043041904 | stable | ZNF429      |
| 0.043057558 | stable | ZNF607      |
| 0.04307193  | stable | ABHD3       |
| 0.043162643 | stable | LOC648494   |
| 0.043179488 | stable | SYT4        |
| 0.043193108 | stable | CSTB        |
| 0.043193108 | stable | CENPE       |
| 0.043228119 | stable | LIMK2       |
| 0.043281018 | stable | SULT1A2     |
| 0.043424475 | stable | APOOL       |
| 0.043463508 | stable | RGS7BP      |
| 0.043480388 | stable | DAD1        |
| 0.043499962 | stable | RAB33A      |
| 0.043499962 | stable | HNT         |
| 0.043616665 | stable | SEC11C      |
| 0.043622345 | stable | C8ORF31     |
| 0.043684995 | stable | C16ORF90    |
| 0.043684995 | stable | LOC653895   |
| 0.043694624 | stable | C1ORF103    |
| 0.043845295 | stable | CMAS        |
| 0.043862807 | stable | FER         |
| 0.043881709 | stable | DENND5B     |
| 0.043881709 | stable | PSMD14      |
| 0.04401032  | stable | ATP5A1      |
| 0.044012773 | stable | FASTKD3     |
| 0.044021086 | stable | LOC650706   |
| 0.04416546  | stable | AHCTF1      |
| 0.044275667 | stable | ASB1        |
| 0.044294425 | stable | ZNF695      |
| 0.044350362 | stable | RNF25       |
| 0.044485876 | stable | LOC653214   |
| 0.044513669 | stable | ASF1B       |
| 0.044579564 | stable | FCHO1       |
| 0.044663056 | stable | ARG1        |
| 0.044690755 | stable | PCYT2       |
| 0.044696446 | stable | C1ORF176    |
| 0.044720639 | stable | CDC27       |
| 0.044720639 | stable | CRAT        |
| 0.044720639 | stable | CFLAR       |
| 0.044727566 | stable | MYCBPAP     |
| 0.044941106 | stable | PIGV        |
| 0.044997942 | stable | DCDC5       |
| 0.045040158 | stable | LSM1        |
| 0.04507341  | stable | BNIP3L      |
| 0.04513037  | stable | LOC389672   |
| 0.045279262 | stable | LOC387934   |
| 0.045378533 | stable | PSCA        |
| 0.045546935 | stable | METTL10     |
| 0.045566667 | stable | CLK2        |
| 0.045566667 | stable | PPAN-P2RY11 |
| 0.045581846 | stable | PNPLA2      |



## DEG.infomation

|             |        |               |
|-------------|--------|---------------|
| 0.045677297 | stable | FRMD6         |
| 0.045689682 | stable | C1ORF152      |
| 0.045706333 | stable | L3MBTL        |
| 0.045706333 | stable | RAC1          |
| 0.045706333 | stable | THSD1         |
| 0.045757368 | stable | SDK1          |
| 0.045785328 | stable | GALNTL1       |
| 0.04579003  | stable | LOC642771     |
| 0.045840095 | stable | ITGA11        |
| 0.045969698 | stable | C4ORF32       |
| 0.045988596 | stable | UBE2F         |
| 0.046176969 | stable | LOC642787     |
| 0.046176969 | stable | C7ORF55       |
| 0.046227727 | stable | KIF1C         |
| 0.046227727 | stable | ZNF713        |
| 0.046227727 | stable | C19ORF48      |
| 0.046227727 | stable | KIAA0323      |
| 0.046250407 | stable | CACNA2D3      |
| 0.046315678 | stable | FAHD1         |
| 0.046358169 | stable | SLC35A4       |
| 0.046359898 | stable | ANKRD54       |
| 0.046457402 | stable | TOR2A         |
| 0.046482188 | stable | TLR1          |
| 0.046503573 | stable | RNF208        |
| 0.04655421  | stable | ZNF347        |
| 0.046599099 | stable | BSG           |
| 0.046599099 | stable | PRSS27        |
| 0.046620958 | stable | ORAI2         |
| 0.046660779 | stable | GCAT          |
| 0.046688974 | stable | RHOBTB2       |
| 0.046692929 | stable | LOC440132     |
| 0.046727304 | stable | MDN1          |
| 0.046741787 | stable | LRRC55        |
| 0.046777103 | stable | LOC645466     |
| 0.046791478 | stable | ANKH          |
| 0.046831249 | stable | ZNF294        |
| 0.046876977 | stable | IL2RG         |
| 0.046917125 | stable | GUF1          |
| 0.046927758 | stable | ZNF202        |
| 0.046970464 | stable | DLEU1         |
| 0.046999181 | stable | RANBP2L1      |
| 0.047060034 | stable | LEAP-2        |
| 0.047060034 | stable | RP11-529I10.4 |
| 0.04707906  | stable | LOC644012     |
| 0.047104847 | stable | RPESP         |
| 0.047136976 | stable | POFUT1        |
| 0.047161925 | stable | BSN           |
| 0.047164173 | stable | TMEM219       |
| 0.0472055   | stable | COX7B         |
| 0.047213216 | stable | TMSB4Y        |
| 0.047264433 | stable | TNFAIP8L2     |

## DEG.infomation

|             |        |           |
|-------------|--------|-----------|
| 0.047264433 | stable | LOC644380 |
| 0.047277203 | stable | LOC441087 |
| 0.047282884 | stable | LOC652404 |
| 0.047369152 | stable | PGM5      |
| 0.047396106 | stable | FOXP1     |
| 0.047396106 | stable | DCTN3     |
| 0.047419721 | stable | RASGEF1C  |
| 0.047438791 | stable | RGS3      |
| 0.047526286 | stable | MEF2D     |
| 0.047655779 | stable | LOC646304 |
| 0.047691852 | stable | SOD3      |
| 0.047722889 | stable | CHPT1     |
| 0.047726501 | stable | TPK1      |
| 0.047726501 | stable | ACPP      |
| 0.047773811 | stable | XPA       |
| 0.047774305 | stable | LOC554208 |
| 0.047801765 | stable | KIF2A     |
| 0.047872498 | stable | LOC651723 |
| 0.047872498 | stable | KIAA0664  |
| 0.047934218 | stable | GOLPH3L   |
| 0.048050755 | stable | C9ORF5    |
| 0.048086858 | stable | HIST1H2BL |
| 0.048116224 | stable | ZC3H12A   |
| 0.048127442 | stable | NTRK2     |
| 0.048223181 | stable | KIAA1199  |
| 0.04823948  | stable | PRRG4     |
| 0.04823948  | stable | DEFB118   |
| 0.04823948  | stable | GPR177    |
| 0.048265734 | stable | DUSP11    |
| 0.048298731 | stable | LOC653227 |
| 0.048334884 | stable | KCNH3     |
| 0.048385572 | stable | SLC6A19   |
| 0.048438332 | stable | KREMEN1   |
| 0.048441255 | stable | FAM160A2  |
| 0.048441255 | stable | LOC440396 |
| 0.048441255 | stable | SQRDL     |
| 0.048507426 | stable | HAX1      |
| 0.048511103 | stable | HIBADH    |
| 0.048535502 | stable | RTP4      |
| 0.048560056 | stable | VCPIP1    |
| 0.048560091 | stable | C17ORF74  |
| 0.048660718 | stable | LASS1     |
| 0.048660718 | stable | LOC642113 |
| 0.048684048 | stable | CLTCL1    |
| 0.04870022  | stable | MAP3K12   |
| 0.048724013 | stable | RBM25     |
| 0.048744733 | stable | LOC653748 |
| 0.048792083 | stable | LOC220729 |
| 0.048792083 | stable | CBX2      |
| 0.048803973 | stable | PANX1     |
| 0.048831531 | stable | MCART1    |

DEG.infomation

|             |        |           |
|-------------|--------|-----------|
| 0.048841034 | stable | ALDH18A1  |
| 0.049010633 | stable | SUDS3     |
| 0.049090664 | stable | C1QTNF2   |
| 0.049128351 | stable | UQCRH     |
| 0.049189201 | stable | KNTC1     |
| 0.049195218 | stable | ZFX       |
| 0.049201097 | stable | LOC728069 |
| 0.04927505  | stable | KIRREL    |
| 0.049297454 | stable | ATP7A     |
| 0.049298721 | stable | ATF7IP    |
| 0.049306643 | stable | PDCD1     |
| 0.049309037 | stable | MYH14     |
| 0.049319503 | stable | EPS15L1   |
| 0.049329185 | stable | ITGAL     |
| 0.049420811 | stable | RFC3      |
| 0.049469926 | stable | LOC81691  |
| 0.04947163  | stable | LOC651407 |
| 0.049550076 | stable | FAM36A    |
| 0.049647613 | stable | FAM80B    |
| 0.049826374 | stable | THEM4     |
| 0.04986304  | stable | GMPR      |
| 0.049915078 | stable | SLC44A5   |
| 0.049915078 | stable | DDR2      |
| 0.05006541  | stable | ATP6V1G1  |
| 0.050081178 | stable | SH2D1A    |
| 0.050086731 | stable | RPS6KA5   |
| 0.050090628 | stable | ZFAND2B   |
| 0.050211675 | stable | TWIST2    |
| 0.050211675 | stable | LAT       |
| 0.050216256 | stable | MRPL39    |
| 0.05025563  | stable | SLC12A8   |
| 0.050257316 | stable | CCDC102B  |
| 0.050271054 | stable | FBXO16    |
| 0.050271461 | stable | HSD11B1L  |
| 0.050271461 | stable | FAM76B    |
| 0.0502898   | stable | RDH16     |
| 0.050316913 | stable | OTUD7A    |
| 0.050316913 | stable | CCL24     |
| 0.050326917 | stable | AKAP7     |
| 0.050331464 | stable | KIAA0101  |
| 0.050331464 | stable | WDR5B     |
| 0.050455628 | stable | LOC644268 |
| 0.050471839 | stable | LOC652623 |
| 0.050562855 | stable | ANAPC7    |
| 0.050596942 | stable | RAP1A     |
| 0.050667123 | stable | RBM9      |
| 0.050749501 | stable | PCBP4     |
| 0.050763271 | stable | DKK4      |
| 0.050824333 | stable | CNN3      |
| 0.050897478 | stable | LOC645070 |
| 0.051036445 | stable | FALZ      |

## DEG.infomation

|             |        |           |
|-------------|--------|-----------|
| 0.051046781 | stable | HIAT1     |
| 0.051075979 | stable | GABARAP   |
| 0.051159725 | stable | HNRNPF    |
| 0.05116885  | stable | TMED10P   |
| 0.051171085 | stable | IL6ST     |
| 0.051228079 | stable | MMAB      |
| 0.051228079 | stable | SNRPG     |
| 0.051291747 | stable | SNPH      |
| 0.051291747 | stable | CCDC97    |
| 0.051389916 | stable | PROM2     |
| 0.051412775 | stable | GDPD3     |
| 0.051438119 | stable | NT5C3L    |
| 0.051438119 | stable | CLDND1    |
| 0.051473132 | stable | ZBTB46    |
| 0.051608931 | stable | LAIR2     |
| 0.051616592 | stable | FTHL12    |
| 0.05164015  | stable | LOC653803 |
| 0.051647005 | stable | DSC2      |
| 0.051647005 | stable | LILRB3    |
| 0.051724392 | stable | RAD51L3   |
| 0.051724392 | stable | SVOP      |
| 0.051785711 | stable | LOC649775 |
| 0.05180542  | stable | LOC220686 |
| 0.051838521 | stable | DDX28     |
| 0.05191112  | stable | TMEM134   |
| 0.051912636 | stable | C19ORF56  |
| 0.051939536 | stable | SYNPR     |
| 0.051994954 | stable | USP9Y     |
| 0.052074337 | stable | SLC13A1   |
| 0.052085683 | stable | HBXIP     |
| 0.052085683 | stable | BTG1      |
| 0.052173665 | stable | MRPS17    |
| 0.052343284 | stable | GPC4      |
| 0.052359952 | stable | PUS7L     |
| 0.052359952 | stable | OR3A4     |
| 0.052482921 | stable | SELM      |
| 0.052593431 | stable | TAF7L     |
| 0.052593431 | stable | KRT19     |
| 0.052593431 | stable | METTL2A   |
| 0.052593431 | stable | SHROOM2   |
| 0.052627716 | stable | GBP5      |
| 0.052627716 | stable | CECR1     |
| 0.0527146   | stable | NDUFA11   |
| 0.0527146   | stable | COMMD5    |
| 0.05274359  | stable | LOC727825 |
| 0.052779847 | stable | PLA2G2D   |
| 0.052898887 | stable | MED24     |
| 0.052902098 | stable | C17ORF28  |
| 0.052922984 | stable | LOC646483 |
| 0.052922984 | stable | CDRT4     |
| 0.052953944 | stable | PSG6      |

## DEG.infomation

|             |        |              |
|-------------|--------|--------------|
| 0.052982421 | stable | SLC24A1      |
| 0.0530533   | stable | CD8A         |
| 0.053116858 | stable | ACTR3        |
| 0.053146951 | stable | LOC650885    |
| 0.053202552 | stable | FSD1CL       |
| 0.053219358 | stable | ABI3BP       |
| 0.053232894 | stable | GBE1         |
| 0.053237093 | stable | MRPS24       |
| 0.053239316 | stable | NCOR1        |
| 0.053344884 | stable | NLRP12       |
| 0.053394821 | stable | CPVL         |
| 0.053431112 | stable | MAP2K4       |
| 0.053481861 | stable | OSBPL11      |
| 0.05348465  | stable | HDDC3        |
| 0.05349621  | stable | CCDC137      |
| 0.05349621  | stable | LOC653071    |
| 0.05360208  | stable | MGC48637     |
| 0.05360208  | stable | ZBTB5        |
| 0.05360208  | stable | TRIM16L      |
| 0.053626594 | stable | PEX5         |
| 0.05363198  | stable | C19ORF41     |
| 0.053686104 | stable | MYPN         |
| 0.053696956 | stable | LOC651816    |
| 0.053765883 | stable | FAM130A2     |
| 0.053765883 | stable | SFRS10       |
| 0.053807791 | stable | C19ORF39     |
| 0.053818353 | stable | SLC6A12      |
| 0.053923    | stable | ZBTB45       |
| 0.053937776 | stable | PRPS1L1      |
| 0.053967318 | stable | THOC1        |
| 0.054039857 | stable | KLHL23       |
| 0.054071776 | stable | SSBP4        |
| 0.054103659 | stable | DENND1A      |
| 0.054164405 | stable | CCBE1        |
| 0.054193194 | stable | PCDHB8       |
| 0.054222537 | stable | LOC645004    |
| 0.054231686 | stable | TMED1        |
| 0.054371592 | stable | NKX1-2       |
| 0.054538716 | stable | SLC38A4      |
| 0.054538716 | stable | PGM2         |
| 0.054562078 | stable | MCART2       |
| 0.054592807 | stable | C5ORF33      |
| 0.054606873 | stable | LOC387882    |
| 0.054627558 | stable | SPEF2        |
| 0.054724678 | stable | LOC653338    |
| 0.054752461 | stable | WFIKKN1      |
| 0.054752461 | stable | PDLIM3       |
| 0.054775595 | stable | LOC730031    |
| 0.054775595 | stable | TTC39C       |
| 0.0547933   | stable | IGFBP2       |
| 0.054798085 | stable | DKFZP564J102 |

## DEG.infomation

|             |        |           |
|-------------|--------|-----------|
| 0.054858479 | stable | LOC643821 |
| 0.054895277 | stable | CENTD2    |
| 0.054895277 | stable | TBC1D3B   |
| 0.054898288 | stable | MIA3      |
| 0.05493166  | stable | LOC202181 |
| 0.055005391 | stable | CCDC74B   |
| 0.055015095 | stable | TNFRSF9   |
| 0.055198623 | stable | TFPI2     |
| 0.055212744 | stable | STK35     |
| 0.055322996 | stable | TDP1      |
| 0.055327345 | stable | BBS10     |
| 0.055342197 | stable | SLC6A15   |
| 0.055420686 | stable | USP5      |
| 0.055434795 | stable | FRMD7     |
| 0.055440931 | stable | CISD2     |
| 0.055526471 | stable | C11ORF87  |
| 0.055529561 | stable | THAP2     |
| 0.05553957  | stable | PSMC1     |
| 0.055585769 | stable | LOC613037 |
| 0.055588083 | stable | OR2L13    |
| 0.055664988 | stable | MS4A14    |
| 0.055678924 | stable | HUS1B     |
| 0.055710115 | stable | MRPS11    |
| 0.055747937 | stable | HLCS      |
| 0.055765786 | stable | KCTD3     |
| 0.055980555 | stable | CCDC106   |
| 0.056035881 | stable | MORN2     |
| 0.05625669  | stable | GTPBP2    |
| 0.056272194 | stable | LRRC14    |
| 0.056284986 | stable | ADRB1     |
| 0.056330319 | stable | TDRD3     |
| 0.056427613 | stable | LOC650263 |
| 0.056429397 | stable | LOC728715 |
| 0.056476662 | stable | LOC645058 |
| 0.0564945   | stable | NDUFA7    |
| 0.056649717 | stable | TBC1D17   |
| 0.056662437 | stable | TLK1      |
| 0.056705616 | stable | MORC3     |
| 0.056832309 | stable | C7ORF57   |
| 0.056940498 | stable | COX11P    |
| 0.056952492 | stable | IL15      |
| 0.057039743 | stable | SUCLG2    |
| 0.057139812 | stable | ARMETL1   |
| 0.057151368 | stable | FBXO22    |
| 0.057165597 | stable | BMP5      |
| 0.057165597 | stable | RRP1B     |
| 0.057195137 | stable | FLJ39061  |
| 0.05721547  | stable | LOC606495 |
| 0.057327163 | stable | CCL18     |
| 0.057392016 | stable | OR2B2     |
| 0.057392016 | stable | FAM131C   |

## DEG.infomation

|             |        |           |
|-------------|--------|-----------|
| 0.057421564 | stable | UBAP2L    |
| 0.057424894 | stable | NOLA3     |
| 0.057484229 | stable | IRS1      |
| 0.05759497  | stable | EHD4      |
| 0.05759497  | stable | PRSS35    |
| 0.057713242 | stable | LRFN5     |
| 0.057768766 | stable | LOC646766 |
| 0.057778915 | stable | LOC652607 |
| 0.057834939 | stable | LY6G5B    |
| 0.058038183 | stable | SRRM2     |
| 0.05807294  | stable | SAMD14    |
| 0.05807294  | stable | USP2      |
| 0.058220802 | stable | WBSCR16   |
| 0.058254697 | stable | IPP       |
| 0.058296691 | stable | KIF20A    |
| 0.058305376 | stable | LOC653344 |
| 0.058339899 | stable | SNORD55   |
| 0.058341978 | stable | SOX7      |
| 0.058375393 | stable | OSBPL8    |
| 0.058375393 | stable | GGCT      |
| 0.058375393 | stable | LOC644075 |
| 0.058449109 | stable | POLG2     |
| 0.058457058 | stable | RCP9      |
| 0.058531761 | stable | ZNF185    |
| 0.058531761 | stable | GLT6D1    |
| 0.058587712 | stable | RASSF6    |
| 0.058615022 | stable | LOC653108 |
| 0.058617935 | stable | LOC645983 |
| 0.058728886 | stable | CLMN      |
| 0.058775355 | stable | HHLA3     |
| 0.058831261 | stable | KCNK17    |
| 0.058873769 | stable | PRPF6     |
| 0.058891205 | stable | PISD      |
| 0.058949262 | stable | CGI-96    |
| 0.058949262 | stable | CRHBP     |
| 0.058969761 | stable | APC       |
| 0.058986576 | stable | SAFB2     |
| 0.059044479 | stable | GNB2      |
| 0.059076246 | stable | LOC647596 |
| 0.059126178 | stable | MTA1      |
| 0.05915548  | stable | GEN1      |
| 0.059172695 | stable | TBL1X     |
| 0.059172695 | stable | NFYA      |
| 0.059250553 | stable | CITED4    |
| 0.059250553 | stable | PAP2D     |
| 0.059296145 | stable | MGC62100  |
| 0.059346107 | stable | NAPRT1    |
| 0.059414032 | stable | VPS13C    |
| 0.059430339 | stable | INHBE     |
| 0.059544735 | stable | LOC134145 |
| 0.059576363 | stable | ACCN2     |

## DEG.infomation

|             |        |           |
|-------------|--------|-----------|
| 0.05959519  | stable | IL10      |
| 0.059616381 | stable | HCN3      |
| 0.059734961 | stable | PDCD7     |
| 0.059735985 | stable | C14ORF11  |
| 0.059822806 | stable | LOC642559 |
| 0.059829665 | stable | DNCL1     |
| 0.059890939 | stable | SSH3      |
| 0.059914346 | stable | EIF2AK2   |
| 0.059914346 | stable | UGCGL2    |
| 0.059914346 | stable | RPS6KA6   |
| 0.05994144  | stable | POPDC3    |
| 0.060044097 | stable | RNF6      |
| 0.060054871 | stable | GATS      |
| 0.060135896 | stable | ZNF770    |
| 0.060193626 | stable | PVT1      |
| 0.060265557 | stable | NACAP1    |
| 0.060274623 | stable | C1ORF41   |
| 0.060287731 | stable | B3GNT5    |
| 0.060317657 | stable | TMEM170A  |
| 0.060355554 | stable | SHB       |
| 0.060356653 | stable | ZNF420    |
| 0.060416138 | stable | C9ORF95   |
| 0.060417708 | stable | DTWD2     |
| 0.060423489 | stable | SEC14L5   |
| 0.060424416 | stable | MTCH2     |
| 0.060819018 | stable | ARSB      |
| 0.060950241 | stable | SLC10A7   |
| 0.061011394 | stable | C2ORF47   |
| 0.061060763 | stable | GZMK      |
| 0.061070257 | stable | SRGAP2    |
| 0.061108427 | stable | HNRPH1    |
| 0.061145604 | stable | TMEM69    |
| 0.061145604 | stable | IFRD1     |
| 0.061206686 | stable | ILVBL     |
| 0.061475906 | stable | LAMB3     |
| 0.061523358 | stable | LOC643652 |
| 0.061552768 | stable | LRRRC8C   |
| 0.061561476 | stable | WDR79     |
| 0.06156617  | stable | FFAR2     |
| 0.061616492 | stable | ABI2      |
| 0.061652661 | stable | C19ORF33  |
| 0.061747404 | stable | LOC641926 |
| 0.061796593 | stable | MRPL47    |
| 0.061815653 | stable | CDC14C    |
| 0.061883035 | stable | LOC646434 |
| 0.061917228 | stable | PIM3      |
| 0.061946591 | stable | C22ORF26  |
| 0.061946591 | stable | ENO3      |
| 0.061998178 | stable | LOC653269 |
| 0.062043261 | stable | MAGEF1    |
| 0.062107223 | stable | UCP3      |



## DEG.infomation

|             |        |           |
|-------------|--------|-----------|
| 0.06211066  | stable | MCM10     |
| 0.062140015 | stable | MCM8      |
| 0.062177684 | stable | CLDN5     |
| 0.062199414 | stable | HECTD2    |
| 0.062304289 | stable | BAG5      |
| 0.062307231 | stable | LOC729559 |
| 0.062378127 | stable | HIST1H2BG |
| 0.062399149 | stable | C20ORF108 |
| 0.062400997 | stable | LOC652816 |
| 0.062463587 | stable | ZP3       |
| 0.062515287 | stable | UBXN1     |
| 0.062515287 | stable | HSPA12B   |
| 0.062530494 | stable | LOC375295 |
| 0.062585481 | stable | MLPH      |
| 0.062596284 | stable | FAM62B    |
| 0.062627603 | stable | PHOSPHO2  |
| 0.062683474 | stable | IKZF2     |
| 0.062683474 | stable | LOC645508 |
| 0.062683474 | stable | ZHX1      |
| 0.062684877 | stable | ANKRD27   |
| 0.062684877 | stable | KATNA1    |
| 0.062727675 | stable | MPND      |
| 0.062727675 | stable | PXMP4     |
| 0.062773678 | stable | CA8       |
| 0.062789435 | stable | C9ORF46   |
| 0.062876663 | stable | LOC649095 |
| 0.062931491 | stable | EIF3H     |
| 0.062939099 | stable | SLC46A2   |
| 0.063020064 | stable | TMEM8     |
| 0.063033958 | stable | MORG1     |
| 0.063307895 | stable | GPR175    |
| 0.063334344 | stable | GGCX      |
| 0.063378567 | stable | ALOX15B   |
| 0.063378567 | stable | EPR1      |
| 0.063694661 | stable | PER2      |
| 0.06374169  | stable | CLP1      |
| 0.06377532  | stable | SRL       |
| 0.063825179 | stable | SLC5A8    |
| 0.063872666 | stable | SNN       |
| 0.06390668  | stable | MAD2L1BP  |
| 0.063918943 | stable | LOC441528 |
| 0.063953106 | stable | TYRO3P    |
| 0.063961987 | stable | KLHL25    |
| 0.064011197 | stable | YIF1A     |
| 0.064011197 | stable | SCN5A     |
| 0.064053552 | stable | ATF2      |
| 0.064065385 | stable | PITX1     |
| 0.064124016 | stable | LOC652595 |
| 0.064130888 | stable | LOC654161 |
| 0.064137224 | stable | MCM3APAS  |
| 0.064148982 | stable | RAI16     |

DEG.infomation

|             |        |           |
|-------------|--------|-----------|
| 0.064148982 | stable | RLN1      |
| 0.064310742 | stable | PSMC6     |
| 0.064387917 | stable | PPFIA2    |
| 0.064678885 | stable | C9ORF106  |
| 0.064678885 | stable | PTPRZ1    |
| 0.064730311 | stable | JAK1      |
| 0.064736028 | stable | NKX3-1    |
| 0.064749704 | stable | FAM139A   |
| 0.064782699 | stable | TSR2      |
| 0.064876962 | stable | TOPORS    |
| 0.064985832 | stable | MBD4      |
| 0.064992713 | stable | LOC654074 |
| 0.065213434 | stable | COQ9      |
| 0.065227464 | stable | H2AFJ     |
| 0.065308611 | stable | SLC13A4   |
| 0.065329726 | stable | CNKSR1    |
| 0.065329726 | stable | NBEAL1    |
| 0.0653396   | stable | C6ORF62   |
| 0.065370254 | stable | ERAP1     |
| 0.065428871 | stable | UBE2M     |
| 0.065540162 | stable | ZNHIT1    |
| 0.06558195  | stable | PCSK1N    |
| 0.065600521 | stable | TRIM26    |
| 0.065664179 | stable | GM2A      |
| 0.065717768 | stable | PMF1      |
| 0.065732706 | stable | BIRC5     |
| 0.065758508 | stable | NKAIN3    |
| 0.065758508 | stable | HBA2      |
| 0.065770466 | stable | TIRAP     |
| 0.065854301 | stable | LOC648149 |
| 0.065877132 | stable | PPIB      |
| 0.065878828 | stable | CCDC149   |
| 0.065883361 | stable | LOC197135 |
| 0.066039733 | stable | TIMM23    |
| 0.066047021 | stable | DEFB109   |
| 0.066064407 | stable | CD200     |
| 0.066129868 | stable | MC1R      |
| 0.066129868 | stable | ITIH5     |
| 0.06614109  | stable | SDCBP2    |
| 0.066163636 | stable | AHSG      |
| 0.066172437 | stable | HPS6      |
| 0.066214961 | stable | FBXL3     |
| 0.066254976 | stable | DLL3      |
| 0.066312937 | stable | ZNF576    |
| 0.06638577  | stable | TBCD      |
| 0.066475545 | stable | ACCN5     |
| 0.066491542 | stable | LOC642287 |
| 0.066690125 | stable | DNAJA2    |
| 0.066764815 | stable | MFSD5     |
| 0.066764815 | stable | C7ORF25   |
| 0.066946407 | stable | LOC652577 |

## DEG.infomation

|             |        |           |
|-------------|--------|-----------|
| 0.067153781 | stable | CDC40     |
| 0.067153781 | stable | CAMK2D    |
| 0.067305746 | stable | CHAC1     |
| 0.067317378 | stable | ICOSLG    |
| 0.067368708 | stable | RNF38     |
| 0.06739553  | stable | BICD2     |
| 0.06739553  | stable | OR5J2     |
| 0.067443971 | stable | TECTA     |
| 0.067480411 | stable | DHCR7     |
| 0.067696924 | stable | GPR89A    |
| 0.067764347 | stable | MSH3      |
| 0.067807605 | stable | LOC116236 |
| 0.067840588 | stable | CDH5      |
| 0.067840588 | stable | LOC653801 |
| 0.067842213 | stable | CENPK     |
| 0.067902954 | stable | HSD17B7   |
| 0.067945319 | stable | PRR14     |
| 0.067955041 | stable | HNRPR     |
| 0.067959762 | stable | DTX3L     |
| 0.067991233 | stable | FLJ45717  |
| 0.068018421 | stable | LOC646447 |
| 0.068072737 | stable | GLI1      |
| 0.06815373  | stable | BCL2L2    |
| 0.06815373  | stable | KIR2DS1   |
| 0.068175498 | stable | COL1A1    |
| 0.068175498 | stable | TSGA14    |
| 0.068175498 | stable | GLG1      |
| 0.0681767   | stable | IL17RC    |
| 0.068198448 | stable | ARF4      |
| 0.068238282 | stable | FMNL3     |
| 0.068301589 | stable | CD79A     |
| 0.068317998 | stable | GYPC      |
| 0.06835387  | stable | LOC653326 |
| 0.068433418 | stable | NANOS1    |
| 0.068474616 | stable | KIAA1751  |
| 0.068476363 | stable | ANKRD22   |
| 0.06847901  | stable | TMEM39A   |
| 0.06847901  | stable | TLL6      |
| 0.06847901  | stable | LOC650968 |
| 0.068705043 | stable | ARG99     |
| 0.068705043 | stable | MNT       |
| 0.06872034  | stable | RAB18     |
| 0.068735654 | stable | LOC654113 |
| 0.068761019 | stable | DDX26B    |
| 0.068837577 | stable | CNR2      |
| 0.068837577 | stable | TEX10     |
| 0.068851249 | stable | GAL3ST2   |
| 0.068851249 | stable | CDKL2     |
| 0.06909659  | stable | C6ORF163  |
| 0.069169222 | stable | LOC391322 |
| 0.069383254 | stable | C8ORF76   |

## DEG.infomation

|             |        |           |
|-------------|--------|-----------|
| 0.069468028 | stable | LOC645447 |
| 0.069482776 | stable | EGR2      |
| 0.069488881 | stable | ZNF430    |
| 0.069546214 | stable | TBC1D3    |
| 0.069546214 | stable | BFSP1     |
| 0.06960996  | stable | MBTPS2    |
| 0.06962367  | stable | FAM122A   |
| 0.069629837 | stable | RARG      |
| 0.069679783 | stable | HOXB2     |
| 0.069793994 | stable | NEDD4L    |
| 0.069831709 | stable | HS2ST1    |
| 0.0698714   | stable | ITGA2B    |
| 0.069953274 | stable | RDBP      |
| 0.069988567 | stable | CYP2C9    |
| 0.070015074 | stable | MAPKAPK2  |
| 0.070067457 | stable | JMJD4     |
| 0.070084086 | stable | OR6B1     |
| 0.070096033 | stable | MORC2     |
| 0.070121531 | stable | STX8      |
| 0.070129115 | stable | ARHGAP29  |
| 0.070129115 | stable | DOK2      |
| 0.070158241 | stable | RPL17     |
| 0.070158241 | stable | UNQ9370   |
| 0.070258314 | stable | LOC650566 |
| 0.07029038  | stable | GAS6      |
| 0.07029038  | stable | ZHX3      |
| 0.070300015 | stable | F8A1      |
| 0.070320716 | stable | PIGT      |
| 0.070331551 | stable | SCN9A     |
| 0.070418882 | stable | FAM65B    |
| 0.070442709 | stable | ZNF174    |
| 0.070446807 | stable | SCHIP1    |
| 0.070589417 | stable | TMEM20    |
| 0.070639688 | stable | C10ORF111 |
| 0.070639688 | stable | GPLD1     |
| 0.070733612 | stable | SGMS1     |
| 0.070750541 | stable | EML4      |
| 0.070920371 | stable | PMAIP1    |
| 0.071139733 | stable | C5ORF5    |
| 0.071255186 | stable | C10ORF108 |
| 0.071290798 | stable | C8ORF38   |
| 0.071295832 | stable | MRPL20    |
| 0.071443946 | stable | PCGF2     |
| 0.071443946 | stable | IFFO1     |
| 0.07162094  | stable | ZSCAN21   |
| 0.071785099 | stable | ZPLD1     |
| 0.072125013 | stable | KDEL2     |
| 0.07215402  | stable | CAPS2     |
| 0.072209718 | stable | LOC352909 |
| 0.072269068 | stable | RNF113A   |
| 0.072287663 | stable | LOC643831 |

## DEG.infomation

|             |        |           |
|-------------|--------|-----------|
| 0.072287663 | stable | LOC643774 |
| 0.072363738 | stable | ACE       |
| 0.072387097 | stable | C22ORF29  |
| 0.072387097 | stable | LOC646676 |
| 0.072616701 | stable | SYNJ1     |
| 0.072706767 | stable | ADIPOQ    |
| 0.072728541 | stable | LOC647135 |
| 0.072728541 | stable | C17ORF95  |
| 0.072733781 | stable | FSIP1     |
| 0.072733781 | stable | FBXO48    |
| 0.072774542 | stable | OR14I1    |
| 0.072774542 | stable | ELF2      |
| 0.072830289 | stable | CNTNAP3   |
| 0.07290369  | stable | FSCN1     |
| 0.073003848 | stable | TMEM191B  |
| 0.07303293  | stable | SLC39A13  |
| 0.073034765 | stable | EXOSC3    |
| 0.073120056 | stable | RAB27B    |
| 0.073172102 | stable | EIF2AK4   |
| 0.073260685 | stable | RPL13A    |
| 0.073329026 | stable | ZNF317    |
| 0.073501181 | stable | RBX1      |
| 0.073601212 | stable | DDB2      |
| 0.073640258 | stable | LOC650577 |
| 0.073683764 | stable | COL4A4    |
| 0.073785558 | stable | C2ORF7    |
| 0.073911653 | stable | NARFL     |
| 0.073944447 | stable | YIPF2     |
| 0.07394734  | stable | DFFB      |
| 0.073975238 | stable | GLE1      |
| 0.074037903 | stable | SCML2     |
| 0.074046292 | stable | APBB2     |
| 0.074053251 | stable | HCG2P7    |
| 0.074058314 | stable | PIK3R3    |
| 0.074058314 | stable | KLRF1     |
| 0.074058314 | stable | LRRC24    |
| 0.074158495 | stable | FAR1      |
| 0.074232666 | stable | LRRC34    |
| 0.074232666 | stable | GHRL      |
| 0.074248864 | stable | LOC650003 |
| 0.074302699 | stable | CCR9      |
| 0.074315751 | stable | LSDP5     |
| 0.074403324 | stable | VAR52     |
| 0.074403324 | stable | HMGB4     |
| 0.074413443 | stable | TAS2R10   |
| 0.07448054  | stable | GCH1      |
| 0.07448054  | stable | C14ORF124 |
| 0.074509622 | stable | MYO1B     |
| 0.074515529 | stable | CREM      |
| 0.074656351 | stable | CP        |
| 0.074689037 | stable | LOC643959 |

## DEG.infomation

|             |        |           |
|-------------|--------|-----------|
| 0.074713321 | stable | LOC650193 |
| 0.074721381 | stable | LPIN2     |
| 0.074864586 | stable | LIN54     |
| 0.074879037 | stable | TSSK6     |
| 0.074922795 | stable | NR1H2     |
| 0.074931241 | stable | RFC5      |
| 0.074956881 | stable | LOC643790 |
| 0.075080679 | stable | LOC730479 |
| 0.075080679 | stable | IL12RB1   |
| 0.075113211 | stable | NMT1      |
| 0.07512878  | stable | MATK      |
| 0.075145872 | stable | CREG1     |
| 0.075236024 | stable | LOC646437 |
| 0.075237824 | stable | LOC651326 |
| 0.075316081 | stable | CCT5      |
| 0.075335541 | stable | TP53I3    |
| 0.075405837 | stable | LOC729882 |
| 0.075435679 | stable | METT5D1   |
| 0.075524983 | stable | LOC162073 |
| 0.075542188 | stable | C5ORF45   |
| 0.075573014 | stable | LOC729137 |
| 0.075609886 | stable | PSMD12    |
| 0.075701184 | stable | SLC25A23  |
| 0.075744606 | stable | LOC729675 |
| 0.075802593 | stable | IARS      |
| 0.075857343 | stable | LOC642156 |
| 0.075916161 | stable | MBOAT2    |
| 0.075916161 | stable | RHOT1     |
| 0.075936085 | stable | HES4      |
| 0.075987499 | stable | C15ORF37  |
| 0.076103322 | stable | BDH2      |
| 0.076140653 | stable | C1ORF59   |
| 0.076146507 | stable | UHMK1     |
| 0.076146507 | stable | ZNF625    |
| 0.076153018 | stable | SLC25A42  |
| 0.076284712 | stable | LOC645015 |
| 0.076302461 | stable | SV2A      |
| 0.076346383 | stable | ATP6AP1   |
| 0.076381756 | stable | LOC653450 |
| 0.076405172 | stable | HR        |
| 0.076417517 | stable | LOC387790 |
| 0.076438546 | stable | CCDC71    |
| 0.076536099 | stable | RASA2     |
| 0.076557884 | stable | SEC24B    |
| 0.076574695 | stable | UBE2L3    |
| 0.076649834 | stable | SETDB1    |
| 0.07666206  | stable | MITF      |
| 0.076739947 | stable | LOC643995 |
| 0.076744597 | stable | LOC646858 |
| 0.076746025 | stable | ALKBH7    |
| 0.076746025 | stable | HERC3     |

## DEG.infomation

|             |        |           |
|-------------|--------|-----------|
| 0.076746025 | stable | APH1B     |
| 0.076746025 | stable | LOC653383 |
| 0.076746025 | stable | SLC27A3   |
| 0.076746025 | stable | KCNRG     |
| 0.076808663 | stable | LOC644150 |
| 0.07688721  | stable | CPT1C     |
| 0.076889044 | stable | WNK3      |
| 0.076889044 | stable | SPATA13   |
| 0.077000067 | stable | MRPS10    |
| 0.077140244 | stable | DCP2      |
| 0.077210806 | stable | C6ORF201  |
| 0.077210806 | stable | PLEKHJ1   |
| 0.077241686 | stable | LOC391767 |
| 0.07734361  | stable | PTGER3    |
| 0.077417763 | stable | LOC127406 |
| 0.077422725 | stable | ACAP3     |
| 0.077652258 | stable | ZNF236    |
| 0.077722672 | stable | DYSF      |
| 0.077860572 | stable | LOC400464 |
| 0.077864808 | stable | MRPS9     |
| 0.077864808 | stable | ADAMTS17  |
| 0.078000947 | stable | UBQLN1    |
| 0.078002494 | stable | ZMYM3     |
| 0.078162541 | stable | ARFIP1    |
| 0.078314075 | stable | LOC652140 |
| 0.078404098 | stable | DOLK      |
| 0.078423138 | stable | ZNF835    |
| 0.078423742 | stable | C22ORF31  |
| 0.078445857 | stable | CLEC2B    |
| 0.07846416  | stable | CD72      |
| 0.07846416  | stable | ZNF566    |
| 0.078537784 | stable | POM121    |
| 0.078660974 | stable | LOC652889 |
| 0.078664358 | stable | LOC654032 |
| 0.078770782 | stable | PLS3      |
| 0.078770782 | stable | TESSP5    |
| 0.078911918 | stable | PTPN22    |
| 0.078912718 | stable | TNFRSF4   |
| 0.07900312  | stable | C15ORF5   |
| 0.079366181 | stable | GINS3     |
| 0.079376582 | stable | DAPP1     |
| 0.079381135 | stable | PIM2      |
| 0.079494006 | stable | GRIN3A    |
| 0.079494006 | stable | DAXX      |
| 0.079532231 | stable | TSN       |
| 0.079599549 | stable | ENC1      |
| 0.07968935  | stable | DNAL4     |
| 0.07968935  | stable | SSR4      |
| 0.079754318 | stable | WWTR1     |
| 0.079758205 | stable | FUT8      |
| 0.079780816 | stable | B3GNT9    |

## DEG.infomation

|             |        |           |
|-------------|--------|-----------|
| 0.079873866 | stable | RPUSD3    |
| 0.079926766 | stable | AHDC1     |
| 0.079943331 | stable | FAM118A   |
| 0.080045113 | stable | RICS      |
| 0.080126795 | stable | PICK1     |
| 0.080170511 | stable | NOC3L     |
| 0.080174586 | stable | EIF3K     |
| 0.080203369 | stable | TCF15     |
| 0.080212497 | stable | MSL2L1    |
| 0.080212497 | stable | PCYT1B    |
| 0.080259601 | stable | LOC646938 |
| 0.080265438 | stable | SFXN4     |
| 0.080312486 | stable | USP1      |
| 0.080354104 | stable | NCOR2     |
| 0.080354104 | stable | SERF1B    |
| 0.080354104 | stable | CLIP4     |
| 0.080354104 | stable | LYG2      |
| 0.080357006 | stable | SCP2      |
| 0.080413601 | stable | NDUFB1    |
| 0.080413601 | stable | NNAT      |
| 0.080469106 | stable | CMC1      |
| 0.080484228 | stable | LOC255326 |
| 0.080552862 | stable | KLHDC8B   |
| 0.080568862 | stable | C6ORF159  |
| 0.080576633 | stable | YY1       |
| 0.080628026 | stable | CENPC1    |
| 0.080684869 | stable | VASH1     |
| 0.080738293 | stable | SNORD34   |
| 0.080760782 | stable | RPS6KA4   |
| 0.080830109 | stable | LOC642418 |
| 0.080832787 | stable | C2ORF27   |
| 0.08099835  | stable | CST2      |
| 0.081008581 | stable | ABCA11    |
| 0.081119448 | stable | TMPRSS12  |
| 0.081155122 | stable | POLG      |
| 0.081189984 | stable | PRELP     |
| 0.081274364 | stable | GSTTP2    |
| 0.081371533 | stable | ZNF532    |
| 0.081385007 | stable | NTSR2     |
| 0.081402493 | stable | LOC648639 |
| 0.081457133 | stable | ALMS1     |
| 0.081495296 | stable | FARSLB    |
| 0.08156995  | stable | LOC643870 |
| 0.081854911 | stable | LSG1      |
| 0.081867281 | stable | UAP1L1    |
| 0.081917572 | stable | TMEM91    |
| 0.082011311 | stable | ALAS2     |
| 0.082168319 | stable | ANXA11    |
| 0.082288287 | stable | C7ORF59   |
| 0.082541874 | stable | SRD5A1    |
| 0.082623963 | stable | TRIM37    |



## DEG.infomation

|             |        |           |
|-------------|--------|-----------|
| 0.082652022 | stable | LOC646134 |
| 0.082715286 | stable | RDM1      |
| 0.082715596 | stable | C1ORF107  |
| 0.082872121 | stable | IGLL1     |
| 0.082886534 | stable | LOC389517 |
| 0.082892236 | stable | ABR       |
| 0.082906311 | stable | CALR      |
| 0.083182124 | stable | SPG7      |
| 0.083187143 | stable | FMNL1     |
| 0.083252946 | stable | ZNF319    |
| 0.083319673 | stable | LOC730015 |
| 0.083319673 | stable | NCL       |
| 0.083439577 | stable | PCGF6     |
| 0.083445508 | stable | JARID2    |
| 0.083462129 | stable | LOC648814 |
| 0.0836904   | stable | LOC644243 |
| 0.083708304 | stable | SCGB2A2   |
| 0.08374091  | stable | NEK9      |
| 0.083751526 | stable | RECQL4    |
| 0.083799738 | stable | FAM22A    |
| 0.083875716 | stable | GABPB2    |
| 0.083906501 | stable | VPS4B     |
| 0.083964439 | stable | HERC2P2   |
| 0.083964439 | stable | SDS       |
| 0.084066031 | stable | CNTN6     |
| 0.084106358 | stable | ERV3      |
| 0.084152384 | stable | TRIM71    |
| 0.08420118  | stable | LOC646890 |
| 0.084383656 | stable | BET1L     |
| 0.084389054 | stable | CRABP2    |
| 0.084403363 | stable | GALR2     |
| 0.084467563 | stable | LRRC50    |
| 0.084640998 | stable | SHRM      |
| 0.084658794 | stable | CTGF      |
| 0.084658794 | stable | FAM5C     |
| 0.084685195 | stable | NT5DC1    |
| 0.084732579 | stable | TAC3      |
| 0.084850632 | stable | OAS1      |
| 0.084850632 | stable | STELLAR   |
| 0.084853593 | stable | NHEDC2    |
| 0.084853593 | stable | BAGE3     |
| 0.084897617 | stable | DGAT2     |
| 0.084958614 | stable | PRPH2     |
| 0.085133933 | stable | LOC388789 |
| 0.085151279 | stable | CTSZ      |
| 0.085320031 | stable | NOMO1     |
| 0.085320031 | stable | COX4NB    |
| 0.085428876 | stable | FARS2     |
| 0.085460202 | stable | ALG14     |
| 0.085523904 | stable | FRAT2     |
| 0.085565083 | stable | ASTN1     |

DEG.infomation

|             |        |           |
|-------------|--------|-----------|
| 0.085603701 | stable | ZNF750    |
| 0.085630142 | stable | CTNND1    |
| 0.085641309 | stable | C14ORF151 |
| 0.085662162 | stable | C14ORF173 |
| 0.085759128 | stable | CUL5      |
| 0.085800864 | stable | KRT126P   |
| 0.085844297 | stable | OR11H6    |
| 0.085855444 | stable | LOC643121 |
| 0.085916314 | stable | DOCK5     |
| 0.086016496 | stable | SUMF1     |
| 0.086078722 | stable | HMHA1     |
| 0.086176875 | stable | PGM2L1    |
| 0.08635706  | stable | TMEM39B   |
| 0.086466922 | stable | TRIP11    |
| 0.086486681 | stable | TCF3      |
| 0.086581311 | stable | PDS5B     |
| 0.086673896 | stable | FXD4      |
| 0.086774559 | stable | NKPD1     |
| 0.086774559 | stable | ACSL3     |
| 0.086806766 | stable | ATMIN     |
| 0.086922343 | stable | SCNM1     |
| 0.08696133  | stable | HCFC2     |
| 0.087009602 | stable | LOC389435 |
| 0.087048554 | stable | SYTL3     |
| 0.087291735 | stable | KIAA1683  |
| 0.087372126 | stable | STXBP3    |
| 0.087461284 | stable | C5ORF38   |
| 0.08748192  | stable | CDH22     |
| 0.087556552 | stable | LOC653764 |
| 0.087561776 | stable | IDI1      |
| 0.087585721 | stable | RWDD1     |
| 0.087642664 | stable | LOC646254 |
| 0.087712097 | stable | NSUN5C    |
| 0.087792755 | stable | C14ORF145 |
| 0.087812933 | stable | SHBG      |
| 0.087812933 | stable | RSPH3     |
| 0.087897748 | stable | F11R      |
| 0.087950021 | stable | NAT6      |
| 0.087962105 | stable | LOC643265 |
| 0.087962105 | stable | CHST9     |
| 0.088247577 | stable | LOC642486 |
| 0.088262451 | stable | RSF1      |
| 0.088266502 | stable | C6ORF105  |
| 0.088309418 | stable | FBXL17    |
| 0.088346903 | stable | FLJ20323  |
| 0.088489944 | stable | NRG2      |
| 0.088510629 | stable | RPS10     |
| 0.088607465 | stable | TSP50     |
| 0.088623876 | stable | LOC643842 |
| 0.088702055 | stable | C1QL4     |
| 0.088728584 | stable | LRRK2     |

## DEG.infomation

|             |        |            |
|-------------|--------|------------|
| 0.088770142 | stable | SEPT11     |
| 0.088837944 | stable | SATL1      |
| 0.088995199 | stable | TPST1      |
| 0.089073955 | stable | MDGA1      |
| 0.089089901 | stable | NID2       |
| 0.089149163 | stable | LOC653275  |
| 0.089177486 | stable | FAT4       |
| 0.08928699  | stable | LOC646268  |
| 0.08928699  | stable | HIP2       |
| 0.089328609 | stable | LOC728468  |
| 0.089332342 | stable | IFNAR1     |
| 0.089606981 | stable | LOC440900  |
| 0.089614757 | stable | PCDHB19P   |
| 0.089675163 | stable | FH         |
| 0.08993378  | stable | DSN1       |
| 0.089940781 | stable | IGJ        |
| 0.089962297 | stable | TM7SF4     |
| 0.089971753 | stable | PHCA       |
| 0.090047817 | stable | DIP2C      |
| 0.090083976 | stable | RAB3A      |
| 0.090089629 | stable | NUPL1      |
| 0.09021432  | stable | SGK269     |
| 0.090254715 | stable | SLC22A18AS |
| 0.090340029 | stable | PCDHB13    |
| 0.090388642 | stable | LOC388276  |
| 0.090513348 | stable | MUC2       |
| 0.09051558  | stable | ZNF75A     |
| 0.09051558  | stable | PPP1R13L   |
| 0.09051558  | stable | TOX        |
| 0.090706549 | stable | POLL       |
| 0.090909222 | stable | TRAPPC9    |
| 0.090912653 | stable | DLG2       |
| 0.090982876 | stable | GDPD5      |
| 0.090982876 | stable | ZNF621     |
| 0.091015283 | stable | LOC653471  |
| 0.091032217 | stable | PIK3CA     |
| 0.091032217 | stable | RYR1       |
| 0.091032217 | stable | LOC145853  |
| 0.091041146 | stable | ZNF146     |
| 0.091082749 | stable | PRDM2      |
| 0.091132964 | stable | ANKRD30B   |
| 0.091137259 | stable | PLAC4      |
| 0.091213336 | stable | LOC646562  |
| 0.091248378 | stable | ARHGEF7    |
| 0.091254244 | stable | KCTD13     |
| 0.091254244 | stable | XPNPEP3    |
| 0.091282543 | stable | FLJ45445   |
| 0.091303164 | stable | MTERFD3    |
| 0.091327841 | stable | PDRG1      |
| 0.091412598 | stable | SLC39A9    |
| 0.091476516 | stable | UGCGL1     |

## DEG.infomation

|             |        |           |
|-------------|--------|-----------|
| 0.091542881 | stable | ANKRD2    |
| 0.091588295 | stable | CDCA4     |
| 0.091591586 | stable | SLC34A3   |
| 0.091613036 | stable | FOXI2     |
| 0.091618389 | stable | FEZF2     |
| 0.091647249 | stable | RNUXA     |
| 0.091715628 | stable | FLJ36492  |
| 0.091784872 | stable | DUSP27    |
| 0.09191252  | stable | CATSPERB  |
| 0.091916131 | stable | METT4     |
| 0.092011332 | stable | UBOX5     |
| 0.092031657 | stable | LOC643345 |
| 0.092099736 | stable | CYLN2     |
| 0.092099736 | stable | MAPK12    |
| 0.092234308 | stable | C7ORF28B  |
| 0.092260115 | stable | SPRR2B    |
| 0.092335832 | stable | RASGRP3   |
| 0.092337373 | stable | ZNF548    |
| 0.092368445 | stable | RNF43     |
| 0.092400409 | stable | C6ORF224  |
| 0.092484718 | stable | LMO1      |
| 0.092484718 | stable | ALDH8A1   |
| 0.092648033 | stable | COL25A1   |
| 0.092666377 | stable | C20ORF142 |
| 0.09283938  | stable | CXORF39   |
| 0.09283938  | stable | LGALS7    |
| 0.092965373 | stable | UBQLNL    |
| 0.093035454 | stable | RPL14     |
| 0.093185729 | stable | CLCA4     |
| 0.093185729 | stable | LOC731186 |
| 0.093211013 | stable | CASP3     |
| 0.093285039 | stable | ZNF629    |
| 0.093285039 | stable | TEX13A    |
| 0.093348546 | stable | CLTC      |
| 0.093354637 | stable | GDAP2     |
| 0.093354637 | stable | DCLRE1A   |
| 0.093573247 | stable | LOC643997 |
| 0.093573247 | stable | LOC643913 |
| 0.093585334 | stable | PARP14    |
| 0.093585334 | stable | FLJ46210  |
| 0.093625547 | stable | LOC158160 |
| 0.093625547 | stable | BPNT1     |
| 0.093725743 | stable | LYSMD1    |
| 0.093726594 | stable | S1PR5     |
| 0.093791702 | stable | APEH      |
| 0.093828294 | stable | PKM2      |
| 0.094082267 | stable | KIAA0082  |
| 0.094133657 | stable | C6ORF211  |
| 0.094158873 | stable | LOC731096 |
| 0.094180897 | stable | SNAPC4    |
| 0.094330483 | stable | SENP8     |

## DEG.infomation

|             |        |           |
|-------------|--------|-----------|
| 0.094330483 | stable | LOC642502 |
| 0.094356985 | stable | LOC646871 |
| 0.094372432 | stable | PYCR1     |
| 0.094372432 | stable | FEN1      |
| 0.094386858 | stable | LOC652326 |
| 0.094404571 | stable | ZNF132    |
| 0.094448718 | stable | LOC646825 |
| 0.094454276 | stable | NFIB      |
| 0.094507409 | stable | FRAT1     |
| 0.094507409 | stable | PPP1R7    |
| 0.094624212 | stable | ACSM2A    |
| 0.094695397 | stable | HHATL     |
| 0.094720139 | stable | LOC400120 |
| 0.094773819 | stable | ZNF764    |
| 0.094775569 | stable | ANKRD20A1 |
| 0.094848842 | stable | LOC651655 |
| 0.094891247 | stable | NOTUM     |
| 0.094934323 | stable | LDLRAD3   |
| 0.094956706 | stable | SERPINB4  |
| 0.094961837 | stable | LOC152084 |
| 0.095136755 | stable | RNF123    |
| 0.095151535 | stable | ZNF521    |
| 0.09528172  | stable | GVIN1     |
| 0.095347544 | stable | SSTR5     |
| 0.095363325 | stable | FLJ32065  |
| 0.095363325 | stable | TUBGCP4   |
| 0.095371987 | stable | PTPLAD1   |
| 0.095400814 | stable | RAET1G    |
| 0.095461668 | stable | LOC732450 |
| 0.095461668 | stable | NOL3      |
| 0.095461668 | stable | MED6      |
| 0.095610531 | stable | LOC388578 |
| 0.095712094 | stable | SP140L    |
| 0.095712094 | stable | ABLIM3    |
| 0.095715667 | stable | CD99L2    |
| 0.095727464 | stable | TBC1D24   |
| 0.095727464 | stable | CGRRF1    |
| 0.095751959 | stable | LOC652265 |
| 0.095838109 | stable | CTTN      |
| 0.095969434 | stable | LOC650006 |
| 0.096036002 | stable | EGFLAM    |
| 0.096167578 | stable | IL17RD    |
| 0.096256167 | stable | SYPL1     |
| 0.096280999 | stable | CITED1    |
| 0.096283493 | stable | QPRT      |
| 0.09643084  | stable | FLJ20489  |
| 0.096487643 | stable | RGAG1     |
| 0.096509915 | stable | KRTAP6-2  |
| 0.096551799 | stable | PKP4      |
| 0.09665748  | stable | MKI67IP   |
| 0.096784447 | stable | FLJ40125  |

## DEG.infomation

|             |        |           |
|-------------|--------|-----------|
| 0.096787013 | stable | ZNF454    |
| 0.096787013 | stable | LOC645362 |
| 0.096821265 | stable | LOC440970 |
| 0.096826921 | stable | LOC642775 |
| 0.096844975 | stable | SEC24A    |
| 0.096905141 | stable | ANAPC5    |
| 0.097086243 | stable | TRIM58    |
| 0.097183375 | stable | KCNB1     |
| 0.097268245 | stable | C4B       |
| 0.097322545 | stable | HNRPA1L-2 |
| 0.097345693 | stable | LOC648900 |
| 0.097355882 | stable | KRTAP10-2 |
| 0.097370847 | stable | OR10H3    |
| 0.097384324 | stable | ZNF570    |
| 0.097386465 | stable | TCEAL3    |
| 0.097402019 | stable | LOC647656 |
| 0.097435968 | stable | HIST1H2AE |
| 0.097439331 | stable | CHST6     |
| 0.09745977  | stable | LOC646089 |
| 0.097485564 | stable | LOC113230 |
| 0.097534488 | stable | TSC22D4   |
| 0.097643547 | stable | TRIO      |
| 0.097643547 | stable | BOLA3     |
| 0.097669211 | stable | NPAS3     |
| 0.097800471 | stable | RECQL5    |
| 0.097844034 | stable | BSCL2     |
| 0.098079435 | stable | SLC13A5   |
| 0.098079435 | stable | TRPC7     |
| 0.098094498 | stable | TRIM43    |
| 0.098112689 | stable | SCLT1     |
| 0.098170602 | stable | SOX12     |
| 0.098239377 | stable | EPS8      |
| 0.098239377 | stable | SOX14     |
| 0.098239377 | stable | LOC642889 |
| 0.09826978  | stable | SH3TC2    |
| 0.09828667  | stable | OS9       |
| 0.098354113 | stable | LOC728308 |
| 0.098368196 | stable | LOC339742 |
| 0.098377981 | stable | MEA1      |
| 0.098377981 | stable | IFT140    |
| 0.098377981 | stable | SLC9A6    |
| 0.098384113 | stable | MAN1B1    |
| 0.098581881 | stable | ANAPC2    |
| 0.098655765 | stable | GPR107    |
| 0.098696422 | stable | TMEM107   |
| 0.098735543 | stable | CTGLF1    |
| 0.098744205 | stable | CCDC37    |
| 0.098744205 | stable | TMEM87B   |
| 0.098744205 | stable | SLC25A12  |
| 0.098861498 | stable | LOC644112 |
| 0.09888492  | stable | SAPS1     |

DEG.infomation

|             |        |           |
|-------------|--------|-----------|
| 0.098898187 | stable | LOC643150 |
| 0.098960895 | stable | ZNF846    |
| 0.099006733 | stable | NUDT15    |
| 0.099079572 | stable | LOC728895 |
| 0.099220624 | stable | C16ORF45  |
| 0.099287294 | stable | HN1       |
| 0.099295743 | stable | LOC652246 |
| 0.099295743 | stable | SLC29A3   |
| 0.099340539 | stable | CHCHD8    |
| 0.099382968 | stable | ST5       |
| 0.099451188 | stable | KRT16     |
| 0.099468712 | stable | APOB48R   |
| 0.099471882 | stable | FAM91A1   |
| 0.099471882 | stable | KIF20B    |
| 0.099514505 | stable | NAGPA     |
| 0.099562326 | stable | LRIG1     |
| 0.099607089 | stable | ISY1      |
| 0.099760606 | stable | LOC732425 |
| 0.099762076 | stable | EMILIN2   |
| 0.099775027 | stable | FERMT1    |
| 0.099775027 | stable | DNAJB5    |
| 0.099791978 | stable | LOC646743 |
| 0.099792292 | stable | LOC401280 |
| 0.099792292 | stable | DHX8      |
| 0.099792292 | stable | CT47.7    |
| 0.099792292 | stable | MLL5      |
| 0.099835847 | stable | MOSPD3    |
| 0.099887797 | stable | UNC13A    |
| 0.099898217 | stable | GSR       |
| 0.100090241 | stable | MSL3L1    |
| 0.100111973 | stable | SORT1     |
| 0.100273601 | stable | COL15A1   |
| 0.100273601 | stable | RFXAP     |
| 0.100283908 | stable | GLMN      |
| 0.100392686 | stable | LOC388969 |
| 0.100441596 | stable | CCK       |
| 0.100637399 | stable | HCG18     |
| 0.100646481 | stable | ZNF295    |
| 0.100748095 | stable | TTLL3     |
| 0.100748095 | stable | MTUS1     |
| 0.100826346 | stable | FIBIN     |
| 0.100826346 | stable | SEC24C    |
| 0.100826346 | stable | PRPH      |
| 0.100842649 | stable | PRKAR1B   |
| 0.100868331 | stable | ECAT1     |
| 0.100924487 | stable | PPP4R1    |
| 0.100983231 | stable | RBPMS     |
| 0.101020612 | stable | FKBP8     |
| 0.101020612 | stable | LOC645895 |
| 0.101030101 | stable | LOC646324 |
| 0.101037912 | stable | AGPAT4    |

## DEG.infomation

|             |        |           |
|-------------|--------|-----------|
| 0.101096874 | stable | BAIAP2L2  |
| 0.101124598 | stable | TRIM38    |
| 0.101170949 | stable | KCNH6     |
| 0.101207068 | stable | CPLX2     |
| 0.101313492 | stable | LOC646519 |
| 0.101313492 | stable | LRRC37B   |
| 0.101329314 | stable | C1QTNF5   |
| 0.101332886 | stable | MYCT1     |
| 0.101352998 | stable | RFPL4B    |
| 0.101429112 | stable | LOC441124 |
| 0.101473683 | stable | PANX2     |
| 0.101473683 | stable | LOC653741 |
| 0.101473683 | stable | LOC441584 |
| 0.101524228 | stable | PTPLB     |
| 0.101524228 | stable | NEIL1     |
| 0.101548824 | stable | LOC646210 |
| 0.101581276 | stable | PRDM6     |
| 0.101614866 | stable | VEGFC     |
| 0.101825606 | stable | CGA       |
| 0.10192394  | stable | LOC646561 |
| 0.102392714 | stable | CRTC2     |
| 0.102540875 | stable | CHMP7     |
| 0.102601941 | stable | PLCG2     |
| 0.102602768 | stable | LOC647536 |
| 0.102719744 | stable | C11ORF73  |
| 0.102778942 | stable | PSORS1C1  |
| 0.102819507 | stable | FIT1      |
| 0.102819507 | stable | IL18      |
| 0.102849297 | stable | KIAA1543  |
| 0.1028852   | stable | C1ORF112  |
| 0.102917713 | stable | SIRPG     |
| 0.10317081  | stable | LOC642342 |
| 0.10317081  | stable | PGAP1     |
| 0.10319964  | stable | FLJ21075  |
| 0.103349861 | stable | ZNF665    |
| 0.103363466 | stable | ARHGEF2   |
| 0.103463168 | stable | ZNF511    |
| 0.10364301  | stable | LOC642302 |
| 0.103746526 | stable | CASC2     |
| 0.103775786 | stable | LOC284948 |
| 0.103778383 | stable | SLC17A7   |
| 0.103873474 | stable | RFC4      |
| 0.10408213  | stable | C11ORF39  |
| 0.10408213  | stable | RBL2      |
| 0.10408213  | stable | ANKRD36B  |
| 0.10408213  | stable | LOC653232 |
| 0.10408213  | stable | CIAPIN1   |
| 0.10408213  | stable | CHD7      |
| 0.104095049 | stable | KDELR3    |
| 0.104220646 | stable | ASAP3     |
| 0.104299737 | stable | EPC2      |



## DEG.infomation

|             |        |           |
|-------------|--------|-----------|
| 0.104299737 | stable | AMIGO2    |
| 0.104342264 | stable | C7ORF27   |
| 0.104487222 | stable | MT1B      |
| 0.104487222 | stable | SULF2     |
| 0.10452858  | stable | MED21     |
| 0.104606828 | stable | C9ORF163  |
| 0.104631328 | stable | NCKIPSD   |
| 0.104631328 | stable | CCDC15    |
| 0.104645477 | stable | LOC650898 |
| 0.104645477 | stable | FLJ44606  |
| 0.10477632  | stable | TRAPPC5   |
| 0.104813291 | down   | HLA-A29.1 |
| 0.104898766 | stable | FAM177B   |
| 0.105046725 | stable | ZBTB44    |
| 0.105054744 | stable | EIF1AX    |
| 0.105134098 | stable | LOC654202 |
| 0.105317342 | stable | MLLT6     |
| 0.105353592 | stable | GOLGA7    |
| 0.105508193 | stable | VCX-C     |
| 0.105508193 | stable | BAZ1B     |
| 0.105612487 | stable | LOC646781 |
| 0.105803578 | stable | ZACN      |
| 0.105856181 | stable | TYSND1    |
| 0.105864331 | stable | HGFAC     |
| 0.105953153 | stable | NIPSNAP3B |
| 0.105953153 | stable | OR51T1    |
| 0.105980217 | stable | HBB       |
| 0.106128116 | stable | SF3B3     |
| 0.10612819  | stable | C20ORF111 |
| 0.106175536 | stable | LOC154907 |
| 0.106175536 | stable | BANF1     |
| 0.106238539 | stable | SIN3A     |
| 0.106241717 | stable | NR4A2     |
| 0.106263459 | stable | CCDC78    |
| 0.106415691 | stable | TNFRSF10D |
| 0.106417341 | stable | ELMO2     |
| 0.106492801 | stable | LOC643714 |
| 0.106916195 | stable | PTPRQ     |
| 0.106916195 | stable | NDST4     |
| 0.107122725 | stable | NFAT5     |
| 0.107254635 | stable | LOC645893 |
| 0.107397472 | stable | ETF1      |
| 0.107448163 | stable | LOC646123 |
| 0.107607788 | stable | LOC401895 |
| 0.107621126 | stable | RDH8      |
| 0.107624769 | stable | LOC653629 |
| 0.107751409 | stable | ADAM10    |
| 0.107810101 | stable | CAV2      |
| 0.107977148 | stable | LUZP4     |
| 0.108080569 | stable | SEMA3C    |
| 0.108236008 | stable | PDE10A    |

## DEG.infomation

|             |        |           |
|-------------|--------|-----------|
| 0.108320302 | stable | ZNF781    |
| 0.108359946 | stable | DNM2      |
| 0.10848328  | stable | CD46      |
| 0.108496849 | stable | LOC652287 |
| 0.108867688 | stable | C14ORF129 |
| 0.108905777 | stable | TTL11     |
| 0.108905777 | stable | SEDLP     |
| 0.109119026 | stable | LOC643145 |
| 0.109125414 | stable | LOC392364 |
| 0.109237297 | stable | LOC643596 |
| 0.109254341 | stable | CLDN1     |
| 0.109262012 | stable | TFAM      |
| 0.109262012 | stable | RNMTL1    |
| 0.109262012 | stable | VAMP7     |
| 0.10957773  | stable | SLC44A1   |
| 0.109625826 | stable | ZNF524    |
| 0.109707127 | stable | OR1A1     |
| 0.109831906 | stable | CCL17     |
| 0.109846358 | stable | PAF1      |
| 0.109849011 | stable | IPO5      |
| 0.110017059 | stable | LOC653204 |
| 0.110017059 | stable | MGC70863  |
| 0.110060394 | stable | LOC729264 |
| 0.110060394 | stable | ZNF434    |
| 0.110145003 | stable | NPB       |
| 0.110145891 | stable | LOC653333 |
| 0.110193543 | stable | CCDC134   |
| 0.110249993 | stable | ATP6V1B2  |
| 0.110397309 | stable | LOC653498 |
| 0.110447854 | stable | GNA14     |
| 0.110506449 | stable | ZCCHC6    |
| 0.110566714 | stable | BAI2      |
| 0.110642776 | stable | ZNF675    |
| 0.110650567 | stable | ETV7      |
| 0.110650567 | stable | DNASE1    |
| 0.110670923 | stable | NIT1      |
| 0.110707213 | stable | LOC641699 |
| 0.110731645 | stable | SNORD35A  |
| 0.111007657 | stable | GPX4      |
| 0.111007657 | stable | SPA17     |
| 0.111023791 | stable | ABCC10    |
| 0.111106187 | stable | NUDT14    |
| 0.111106187 | stable | SAT2      |
| 0.111148025 | stable | PARL      |
| 0.111148025 | stable | EPHA8     |
| 0.111239501 | stable | KRT72     |
| 0.111295287 | stable | LOC643262 |
| 0.111295287 | stable | SYTL1     |
| 0.111305188 | stable | FAM53B    |
| 0.11140591  | stable | AMY1B     |
| 0.111460933 | stable | TTYH1     |

## DEG.infomation

|             |        |           |
|-------------|--------|-----------|
| 0.111595994 | stable | DNAH9     |
| 0.111663303 | stable | SMURF2    |
| 0.111683111 | stable | SLCO1A2   |
| 0.111786568 | stable | PDCL      |
| 0.111980443 | stable | HIST1H2BI |
| 0.112013299 | stable | CEP152    |
| 0.11206917  | stable | LOC647839 |
| 0.11206917  | stable | SFRS17A   |
| 0.11206917  | stable | THOC7     |
| 0.112216557 | stable | SNORA32   |
| 0.112227039 | stable | FZD4      |
| 0.11237118  | stable | LOC654163 |
| 0.112445314 | stable | ASXL3     |
| 0.112612032 | stable | LOC647816 |
| 0.112743509 | stable | LOC645875 |
| 0.11280446  | stable | LOC652694 |
| 0.112834271 | stable | LOC647129 |
| 0.112884752 | stable | TBC1D14   |
| 0.112985734 | stable | KIAA1602  |
| 0.113056256 | stable | LOC441177 |
| 0.113072888 | stable | SYCE1     |
| 0.113198009 | stable | GPR114    |
| 0.113198009 | stable | PAPLN     |
| 0.113216956 | stable | EFEMP2    |
| 0.113244466 | stable | LOC90624  |
| 0.113428621 | stable | LOC643000 |
| 0.113448715 | stable | LOC650914 |
| 0.113453507 | stable | LOC651730 |
| 0.113563366 | stable | ZNF320    |
| 0.113610285 | stable | LOC642698 |
| 0.113626495 | stable | ABCA13    |
| 0.11365866  | stable | PATE      |
| 0.113688568 | stable | TOMM7     |
| 0.113692638 | stable | ITPRIPL2  |
| 0.113706372 | stable | LOC646723 |
| 0.114216549 | stable | UBE1DC1   |
| 0.114249623 | stable | SFMBT1    |
| 0.114308123 | stable | RBED1     |
| 0.114360646 | stable | LOC145820 |
| 0.114474685 | stable | CHGA      |
| 0.114562646 | stable | LOC285047 |
| 0.114588254 | stable | NRG3      |
| 0.114786994 | stable | ATP5H     |
| 0.114828673 | stable | LOC643334 |
| 0.114828673 | stable | CXCL9     |
| 0.114896443 | stable | LOC389293 |
| 0.114906943 | stable | ADIG      |
| 0.115032913 | stable | SCN3A     |
| 0.115032913 | stable | LOC650526 |
| 0.115032913 | stable | CCNF      |
| 0.115151728 | stable | RPL10A    |

## DEG.infomation

|             |        |           |
|-------------|--------|-----------|
| 0.115180072 | stable | SPPL2B    |
| 0.115190877 | stable | LOC650548 |
| 0.115316426 | stable | TAF5L     |
| 0.115316426 | stable | PCGF1     |
| 0.115395745 | stable | ATP13A3   |
| 0.115395745 | stable | LOC653086 |
| 0.115505862 | stable | ODF2L     |
| 0.11564563  | stable | CBWD5     |
| 0.11573219  | stable | SDR-O     |
| 0.115735551 | stable | ETV1      |
| 0.115758042 | stable | C16ORF33  |
| 0.115820442 | stable | ZNF207    |
| 0.115821525 | stable | GNGT2     |
| 0.11584653  | stable | LOC643740 |
| 0.115913277 | stable | GFRA2     |
| 0.115945528 | stable | LOC647954 |
| 0.116042108 | stable | TIPRL     |
| 0.116077424 | stable | KIAA1279  |
| 0.116123715 | stable | PARS2     |
| 0.116136506 | stable | KLHL26    |
| 0.116136506 | stable | C2ORF32   |
| 0.116234525 | stable | C20ORF100 |
| 0.116290277 | stable | SIDT1     |
| 0.116431281 | stable | PEX3      |
| 0.116517521 | stable | LOC389983 |
| 0.116532435 | stable | TSPAN11   |
| 0.116534189 | stable | SNORD64   |
| 0.116610135 | stable | CMTM5     |
| 0.116662123 | stable | LOC728825 |
| 0.116662123 | stable | LOC646111 |
| 0.116767113 | stable | RORB      |
| 0.116767113 | stable | DQX1      |
| 0.116767113 | stable | C14ORF79  |
| 0.116767113 | stable | NAE1      |
| 0.116799582 | stable | FPGT      |
| 0.116862607 | stable | ADSL      |
| 0.116958247 | stable | ERBB3     |
| 0.117044464 | stable | TOX3      |
| 0.117081391 | stable | C2ORF40   |
| 0.117116379 | stable | MPFL      |
| 0.117216438 | stable | PRKG1     |
| 0.117406434 | stable | ZNF419    |
| 0.11746553  | stable | LOC441440 |
| 0.117481571 | stable | SYT5      |
| 0.117517332 | stable | JARID1C   |
| 0.117922654 | stable | TCHP      |
| 0.118006647 | stable | RGP1      |
| 0.118033113 | stable | MMEL1     |
| 0.118060711 | stable | PSMD4     |
| 0.118060711 | stable | MAP1B     |
| 0.118060711 | stable | LOC649456 |

DEG.infomation

|             |        |               |
|-------------|--------|---------------|
| 0.1181155   | stable | SDPR          |
| 0.1181155   | stable | NAG18         |
| 0.1181155   | stable | LOC730012     |
| 0.118117429 | stable | DRAP1         |
| 0.118176612 | stable | TMEM84        |
| 0.118228236 | stable | ARL4D         |
| 0.118260062 | stable | DKFZP58611420 |
| 0.118519898 | stable | FLJ43752      |
| 0.11860204  | stable | LOC729310     |
| 0.118671628 | stable | RBP4          |
| 0.118931114 | stable | LRRC31        |
| 0.119018212 | stable | CNPY4         |
| 0.119113821 | stable | FLJ45831      |
| 0.119155551 | stable | LOC644457     |
| 0.119179807 | stable | ZNF460        |
| 0.119197919 | stable | LOC643453     |
| 0.119305849 | stable | LOC554175     |
| 0.119305849 | stable | DOPEY2        |
| 0.119369906 | stable | ATP5J         |
| 0.11941043  | stable | RSBN1         |
| 0.119424707 | stable | G6PC          |
| 0.119428898 | stable | METTL8        |
| 0.119430662 | stable | LOC652204     |
| 0.119619829 | stable | N4BP2         |
| 0.119655713 | stable | LOC651986     |
| 0.119768857 | stable | LOC442382     |
| 0.119778308 | stable | SIGLEC12      |
| 0.119785924 | stable | FZD5          |
| 0.119785924 | stable | NCAPD2        |
| 0.119785924 | stable | LOC643382     |
| 0.119919949 | stable | SIX3          |
| 0.119976555 | stable | LOC441046     |
| 0.120000693 | stable | UBE2V2        |
| 0.120043918 | stable | MOSPD1        |
| 0.120067204 | stable | NUDT18        |
| 0.120426036 | stable | LOC651850     |
| 0.12043648  | stable | MX2           |
| 0.120449536 | stable | RHOC          |
| 0.120557332 | stable | FCRLB         |
| 0.120557332 | stable | TSSC1         |
| 0.120569894 | stable | MSH5          |
| 0.120690712 | stable | HIST1H2BH     |
| 0.120750998 | stable | C6ORF54       |
| 0.120852999 | stable | AGXT2L2       |
| 0.12095414  | stable | LOC728352     |
| 0.121007937 | stable | PES1          |
| 0.121054514 | stable | KRT6B         |
| 0.121193878 | stable | KIAA0256      |
| 0.121352545 | stable | MCMDC1        |
| 0.121390462 | stable | SNORD56B      |
| 0.121396686 | stable | AKT2          |

## DEG.infomation

|             |        |           |
|-------------|--------|-----------|
| 0.121622534 | stable | LOC652857 |
| 0.121624788 | stable | FLYWCH2   |
| 0.121658231 | stable | P15RS     |
| 0.121705016 | stable | OR10G7    |
| 0.121705016 | stable | LOC390259 |
| 0.121721508 | stable | ZNF35     |
| 0.121856082 | stable | C18ORF32  |
| 0.121963076 | stable | LOC441996 |
| 0.121991461 | stable | FLJ20628  |
| 0.12201037  | stable | EIF2C4    |
| 0.122072764 | stable | LOC652046 |
| 0.122117499 | stable | KRT3      |
| 0.122150805 | stable | ICT1      |
| 0.122166075 | stable | HMGB1     |
| 0.12232491  | stable | CACNA2D4  |
| 0.122453672 | stable | CTNNB1    |
| 0.122546003 | stable | SPATA2    |
| 0.122546003 | stable | ATP6V0D1  |
| 0.122596622 | stable | MCF2      |
| 0.122638447 | stable | GOLGA8B   |
| 0.122638447 | stable | PPIA      |
| 0.122660503 | stable | C4ORF19   |
| 0.122786675 | stable | GPT2      |
| 0.122927391 | stable | GOLGA3    |
| 0.122927391 | stable | BCS1L     |
| 0.123014115 | stable | DENND3    |
| 0.123091128 | stable | PCYOX1L   |
| 0.123221565 | stable | CMYA3     |
| 0.123271641 | stable | HP1BP3    |
| 0.123583743 | stable | ARSK      |
| 0.123671104 | stable | LOC651745 |
| 0.123671104 | stable | LOC645364 |
| 0.123679974 | stable | FAM153B   |
| 0.1237766   | stable | CAMKK2    |
| 0.1237766   | stable | PLEKHA3   |
| 0.124010029 | stable | RPL28     |
| 0.124063672 | stable | CUTA      |
| 0.124096738 | stable | F8A3      |
| 0.124173857 | stable | DCDC2     |
| 0.124267355 | stable | LOC153684 |
| 0.124419428 | stable | CSRP1     |
| 0.124824414 | stable | LOC653197 |
| 0.124824414 | stable | MX1       |
| 0.125006034 | stable | TLX2      |
| 0.125327092 | stable | OR2M7     |
| 0.12543442  | stable | SAMHD1    |
| 0.125523489 | stable | D2HGDH    |
| 0.125538389 | stable | TSHZ1     |
| 0.125702206 | stable | CACNA1E   |
| 0.125702206 | stable | RPS9      |
| 0.125721133 | stable | ZNF572    |

## DEG.infomation

|             |        |           |
|-------------|--------|-----------|
| 0.125721133 | stable | CLEC9A    |
| 0.125725215 | stable | VPS25     |
| 0.125727956 | stable | PFDN5     |
| 0.125964278 | stable | OR10Z1    |
| 0.12603363  | stable | ZNF142    |
| 0.12614063  | stable | LOC643686 |
| 0.126170266 | stable | LOC645752 |
| 0.126197985 | stable | CXXC4     |
| 0.126233655 | stable | BRI3BP    |
| 0.126233655 | stable | LOC642666 |
| 0.126314847 | stable | CNFN      |
| 0.126491847 | stable | LOC645535 |
| 0.126526113 | stable | COX6BP1   |
| 0.126582858 | stable | ZNF791    |
| 0.126626152 | stable | PIGB      |
| 0.126671229 | stable | TMEM48    |
| 0.126671229 | stable | BAT2      |
| 0.12678834  | stable | AMZ1      |
| 0.126827023 | stable | NKRF      |
| 0.126981976 | stable | CC2D2B    |
| 0.127053443 | stable | C11ORF80  |
| 0.127178363 | stable | RPL39     |
| 0.127178363 | stable | TSPAN7    |
| 0.127178694 | stable | LOC643430 |
| 0.127264172 | stable | MARCH8    |
| 0.127264172 | stable | RAB42     |
| 0.127264172 | stable | KIAA1033  |
| 0.12727106  | stable | AP2A1     |
| 0.127275927 | stable | NPAS2     |
| 0.127351197 | stable | MADCAM1   |
| 0.127380758 | stable | EIF3IP1   |
| 0.127443078 | stable | SLC2A13   |
| 0.127463561 | stable | FAM114A2  |
| 0.127467624 | stable | FASTKD2   |
| 0.127591067 | stable | LOC646585 |
| 0.127592389 | stable | SASH1     |
| 0.127686768 | stable | SLC4A8    |
| 0.127835322 | stable | PRPSAP1   |
| 0.127835322 | stable | SFRS8     |
| 0.127835322 | stable | TMEM77    |
| 0.127878075 | stable | LOC388237 |
| 0.127878075 | stable | ATP6V0B   |
| 0.127878075 | stable | LOC286208 |
| 0.127933183 | stable | PPIH      |
| 0.128015791 | stable | TMEM176B  |
| 0.128035904 | stable | APOA4     |
| 0.128097648 | stable | LOC440055 |
| 0.128224352 | stable | ARSJ      |
| 0.128224352 | stable | CD99      |
| 0.128224352 | stable | EXOD1     |
| 0.128325785 | stable | TMEM117   |

## DEG.infomation

|             |        |           |
|-------------|--------|-----------|
| 0.128420279 | stable | C20ORF86  |
| 0.128471113 | stable | LOC731102 |
| 0.128568731 | stable | C6ORF114  |
| 0.128580159 | stable | LOC649639 |
| 0.128899567 | stable | TOLLIP    |
| 0.129026587 | stable | FAM103A1  |
| 0.129242842 | stable | SLC12A6   |
| 0.129242842 | stable | CCDC124   |
| 0.129329485 | stable | FLJ10490  |
| 0.129464214 | stable | PHF6      |
| 0.129504778 | stable | TRAM1L1   |
| 0.129659731 | stable | TFIP11    |
| 0.129693374 | stable | LOC654103 |
| 0.129693374 | stable | PRY       |
| 0.129693374 | stable | ARMCX4    |
| 0.129841521 | stable | NSUN2     |
| 0.129841933 | stable | SNX17     |
| 0.129899122 | stable | HMG3      |
| 0.130027316 | stable | OR10A5    |
| 0.130468512 | stable | CPNE6     |
| 0.130555296 | stable | LOC642953 |
| 0.130591392 | stable | THAP3     |
| 0.130977037 | stable | C16ORF14  |
| 0.130978308 | stable | LOC643138 |
| 0.13102998  | stable | TAS2R38   |
| 0.131054517 | stable | CD207     |
| 0.131066436 | stable | RNF4      |
| 0.131349089 | stable | MAN2A1    |
| 0.131399149 | stable | CCDC24    |
| 0.131470073 | stable | LOC645602 |
| 0.131562992 | stable | FAM39DP   |
| 0.131562992 | stable | HLA-DPB1  |
| 0.131578102 | stable | CRYL1     |
| 0.131630665 | stable | FAM131B   |
| 0.131630665 | stable | KHK       |
| 0.13168308  | stable | GAS2L2    |
| 0.131796721 | stable | OR5M10    |
| 0.131820345 | stable | FSTL1     |
| 0.131820345 | stable | C21ORF42  |
| 0.131835383 | stable | GALNT10   |
| 0.132360022 | stable | LOC126536 |
| 0.13238925  | stable | C20ORF20  |
| 0.13238925  | stable | FLJ41170  |
| 0.132390836 | stable | NPC2      |
| 0.132466134 | stable | LOC647006 |
| 0.132472744 | stable | PXMP2     |
| 0.132580177 | stable | PPIL6     |
| 0.132630692 | stable | ESPNL     |
| 0.132667521 | stable | KRT17     |
| 0.132667521 | stable | LOC440737 |
| 0.132781195 | stable | LOC643951 |



## DEG.infomation

|             |        |           |
|-------------|--------|-----------|
| 0.133036292 | stable | STH       |
| 0.133036292 | stable | LOC650321 |
| 0.133369306 | stable | COX5A     |
| 0.133445769 | stable | ZNF574    |
| 0.133445769 | stable | LMF2      |
| 0.133499347 | stable | C19ORF2   |
| 0.133574366 | stable | ZNF771    |
| 0.133594083 | stable | LOC652586 |
| 0.133594083 | stable | LOC644094 |
| 0.133745437 | stable | MTERFD2   |
| 0.133745437 | stable | MS4A8B    |
| 0.133890624 | stable | LOC653689 |
| 0.133894541 | stable | SAMD9     |
| 0.134144302 | stable | NELL2     |
| 0.134147497 | stable | CDC20     |
| 0.134556888 | stable | LBX1      |
| 0.134606642 | stable | LOC653643 |
| 0.134606642 | stable | LIMS2     |
| 0.134713315 | stable | CLCN5     |
| 0.134755585 | stable | CCDC40    |
| 0.134976403 | stable | ITGA8     |
| 0.135017761 | stable | LOC645914 |
| 0.135052019 | stable | C17ORF59  |
| 0.135115216 | stable | ZFPL1     |
| 0.135251935 | stable | LOC641804 |
| 0.135251935 | stable | LOC647691 |
| 0.135288836 | stable | LOC375010 |
| 0.135429726 | stable | VPS37A    |
| 0.135429726 | stable | ART4      |
| 0.135429726 | stable | LOC641741 |
| 0.135429726 | stable | ARL14     |
| 0.135429726 | stable | SEZ6L2    |
| 0.135429726 | stable | WDR85     |
| 0.135578214 | stable | RABL5     |
| 0.13560078  | stable | LOC728248 |
| 0.135669045 | stable | LOC644744 |
| 0.136023216 | stable | LOC644624 |
| 0.136037507 | stable | SFPQ      |
| 0.136084894 | stable | YME1L1    |
| 0.136208034 | stable | MAGED1    |
| 0.136290376 | stable | NUDT21    |
| 0.136452385 | stable | LOC652814 |
| 0.136551332 | stable | OPN1SW    |
| 0.136560315 | stable | KPNA3     |
| 0.136571331 | stable | MRPS28    |
| 0.136589647 | stable | GAA       |
| 0.136589647 | stable | C9ORF130  |
| 0.136590657 | stable | LMO3      |
| 0.136590657 | stable | ARFGEF2   |
| 0.136653921 | stable | SSBP3     |
| 0.136740075 | stable | CCDC72    |

## DEG.infomation

|             |        |           |
|-------------|--------|-----------|
| 0.136819742 | stable | ADCY7     |
| 0.136846653 | stable | TTC24     |
| 0.137055705 | stable | CD164     |
| 0.137212235 | stable | ETS1      |
| 0.137422633 | stable | PDE9A     |
| 0.13751862  | stable | C19ORF31  |
| 0.137642256 | stable | LRIG2     |
| 0.137659508 | stable | RHOF      |
| 0.137669561 | stable | TMEM68    |
| 0.137855953 | stable | TRIM36    |
| 0.137900365 | stable | MRPL24    |
| 0.137997265 | stable | SEPX1     |
| 0.138110101 | stable | ADCYAP1R1 |
| 0.138165642 | stable | POU5F1    |
| 0.138289087 | stable | LOC643817 |
| 0.138292157 | stable | CAPN14    |
| 0.138352519 | stable | INO80B    |
| 0.13836888  | stable | LOC641815 |
| 0.13836888  | stable | NEB       |
| 0.138407622 | stable | PTMA      |
| 0.138467014 | stable | METRNL    |
| 0.138625473 | stable | DNAH10    |
| 0.138655366 | stable | FLJ32679  |
| 0.138655366 | stable | LOC402160 |
| 0.138855388 | stable | LOC642432 |
| 0.138874607 | stable | FLJ22662  |
| 0.13889635  | stable | NSBP1     |
| 0.138939914 | stable | CD247     |
| 0.138985286 | stable | CTSO      |
| 0.138985286 | stable | HAGHL     |
| 0.139100287 | stable | LOC441873 |
| 0.139116498 | stable | CIDEA     |
| 0.139173688 | stable | SLC30A7   |
| 0.139181851 | stable | SAE1      |
| 0.139584165 | stable | SCGB1D4   |
| 0.139627201 | stable | DAPK2     |
| 0.139781523 | stable | SNX27     |
| 0.139915201 | stable | ACVR1     |
| 0.139915201 | stable | BRIP1     |
| 0.13992732  | stable | C9ORF64   |
| 0.140042743 | stable | SYMPK     |
| 0.140074149 | stable | CSNK2A1   |
| 0.140121816 | stable | FBXW9     |
| 0.140267273 | stable | NDUFA5    |
| 0.140267273 | stable | EPGN      |
| 0.140295471 | stable | NHS       |
| 0.140295471 | stable | RBM18     |
| 0.140295471 | stable | SNORA66   |
| 0.140362023 | stable | ZMAT3     |
| 0.140800958 | stable | CNTN5     |
| 0.140959893 | stable | VPS28     |

## DEG.infomation

|             |        |           |
|-------------|--------|-----------|
| 0.141058044 | stable | EYA3      |
| 0.141058044 | stable | LOC646358 |
| 0.141192611 | stable | NUP54     |
| 0.141249828 | stable | LOC285941 |
| 0.141258094 | stable | LOC643687 |
| 0.141276394 | stable | IL9R      |
| 0.141331239 | stable | LOC653145 |
| 0.141384348 | stable | HIPK3     |
| 0.141422545 | stable | C21ORF45  |
| 0.141632131 | stable | NR1H3     |
| 0.141705572 | stable | C14ORF4   |
| 0.141708248 | stable | IL25      |
| 0.141754746 | stable | LOC389895 |
| 0.141792648 | stable | GEMIN6    |
| 0.141869017 | stable | LOC730740 |
| 0.141869017 | stable | BTN3A2    |
| 0.141869017 | stable | OR2L3     |
| 0.141976777 | stable | SCN10A    |
| 0.142009397 | stable | WISP2     |
| 0.142097482 | stable | LOC644276 |
| 0.142097482 | stable | KEAP1     |
| 0.142097482 | stable | ADAMTS8   |
| 0.142207518 | stable | LOC652152 |
| 0.142351388 | stable | SMN1      |
| 0.142499685 | stable | LOC400304 |
| 0.142499685 | stable | CGGBP1    |
| 0.142499685 | stable | FBXO10    |
| 0.142586156 | stable | CGB7      |
| 0.142624994 | stable | KIR2DL1   |
| 0.142678477 | stable | ZNF721    |
| 0.142678477 | stable | LOC643329 |
| 0.142843781 | stable | VAV3      |
| 0.142948931 | stable | SEPT4     |
| 0.143058889 | stable | SMARCAL1  |
| 0.143065254 | stable | LOC653886 |
| 0.143087108 | stable | AHSA1     |
| 0.14311042  | stable | ATOH1     |
| 0.143188712 | stable | ENTPD3    |
| 0.14327241  | stable | ST7L      |
| 0.14363913  | stable | LOC654000 |
| 0.143645962 | stable | LRRC67    |
| 0.143733307 | stable | MSLN      |
| 0.143771749 | stable | SUMO1     |
| 0.143776305 | stable | C1ORF102  |
| 0.143874222 | stable | PSMB5     |
| 0.143874222 | stable | AUTS2     |
| 0.143905095 | stable | WDSOF1    |
| 0.144104034 | stable | COL4A2    |
| 0.144116835 | stable | STAM2     |
| 0.144131741 | stable | ZNF280D   |
| 0.14415209  | stable | ATP2B4    |

## DEG.infomation

|             |        |           |
|-------------|--------|-----------|
| 0.144188459 | stable | FLJ43763  |
| 0.144303063 | stable | CARD9     |
| 0.144450592 | stable | LOC646129 |
| 0.144526347 | stable | LGALS9B   |
| 0.144630121 | stable | LOC727927 |
| 0.144630121 | stable | RBMV2EP   |
| 0.144639155 | stable | MGC52000  |
| 0.144777447 | stable | FLJ21865  |
| 0.144871421 | stable | ALDH9A1   |
| 0.144880231 | stable | LOC653107 |
| 0.145101252 | stable | MED13     |
| 0.145337536 | stable | C6ORF192  |
| 0.145364966 | stable | TSPYL5    |
| 0.14549473  | stable | GRIN2D    |
| 0.145632142 | stable | NCF1B     |
| 0.145926935 | stable | FOXN1     |
| 0.146002095 | stable | CLN6      |
| 0.14600616  | stable | OR2A2     |
| 0.146106269 | stable | LOC650325 |
| 0.146391883 | stable | RPLP0P2   |
| 0.146431693 | stable | TMEM31    |
| 0.146431693 | stable | LOC642821 |
| 0.146433657 | stable | PFKP      |
| 0.146485973 | stable | ARID3A    |
| 0.146485973 | stable | ZNF818    |
| 0.146580283 | stable | DCHS1     |
| 0.146580283 | stable | RBMX      |
| 0.146818785 | stable | ZDHHC13   |
| 0.146914509 | stable | GLB1L     |
| 0.146966982 | stable | RSU1      |
| 0.147139337 | stable | USP41     |
| 0.147261824 | stable | LOC645927 |
| 0.147261824 | stable | THSD1P    |
| 0.147261824 | stable | LOC642757 |
| 0.147261824 | stable | GPR50     |
| 0.147261824 | stable | TSPY1     |
| 0.147284651 | stable | C9ORF96   |
| 0.147349841 | stable | MGC57346  |
| 0.147351096 | stable | LRR44     |
| 0.147504677 | stable | TRIM63    |
| 0.147685425 | stable | LOC728005 |
| 0.147708317 | stable | CDK9      |
| 0.147874993 | stable | SEC14L4   |
| 0.147913896 | stable | CYYR1     |
| 0.147977777 | stable | CHRFAM7A  |
| 0.148112193 | stable | PNPLA8    |
| 0.148260436 | stable | TOM1L1    |
| 0.148344202 | stable | TCP10L    |
| 0.148495215 | stable | AAK1      |
| 0.148558754 | stable | PRODH2    |
| 0.148615559 | stable | GABRP     |

DEG.infomation

|             |        |           |
|-------------|--------|-----------|
| 0.148719532 | stable | MINPP1    |
| 0.148722929 | stable | PDCD5     |
| 0.148760622 | stable | CNOT3     |
| 0.148778323 | stable | NOL7      |
| 0.148831734 | stable | SUSD4     |
| 0.148883252 | stable | LOC643109 |
| 0.149025425 | stable | SERINC3   |
| 0.149025425 | stable | SALL1     |
| 0.149025425 | stable | HES5      |
| 0.149252861 | stable | ALKBH8    |
| 0.149291268 | stable | TBX4      |
| 0.149291268 | stable | C19ORF6   |
| 0.149347889 | stable | RCAN2     |
| 0.149356057 | stable | EXOSC7    |
| 0.149382394 | stable | POP1      |
| 0.14962464  | stable | LOC390712 |
| 0.149702886 | stable | HYDIN     |
| 0.149702886 | stable | LOC645351 |
| 0.149710317 | stable | ACSL1     |
| 0.149849015 | stable | LOC644403 |
| 0.150068349 | stable | KIN       |
| 0.150150077 | stable | ZNF28     |
| 0.150156817 | stable | KIAA1377  |
| 0.150214016 | stable | LOC652565 |
| 0.150308543 | stable | LASS4     |
| 0.150344595 | stable | NRXN2     |
| 0.150344595 | stable | DENND2A   |
| 0.150344595 | stable | BRUNOL6   |
| 0.150349697 | stable | DGCR2     |
| 0.150349697 | stable | LOC643222 |
| 0.150349697 | stable | OR6W1P    |
| 0.150469208 | stable | DMRT3     |
| 0.150471477 | stable | MESDC2    |
| 0.150474603 | stable | ATF1      |
| 0.150474603 | stable | APBB1     |
| 0.150474603 | stable | EPHB3     |
| 0.150474603 | stable | KRTAP10-4 |
| 0.150474603 | stable | CEP70     |
| 0.150534887 | stable | NKAPL     |
| 0.150534887 | stable | C1ORF89   |
| 0.150552566 | stable | HTR6      |
| 0.150604102 | stable | PELI3     |
| 0.150699128 | stable | MS4A13    |
| 0.150809095 | stable | SLCO1C1   |
| 0.150936996 | stable | ZNF559    |
| 0.151034686 | stable | DGKQ      |
| 0.151054407 | stable | CDC73     |
| 0.151190962 | stable | ITIH2     |
| 0.151213978 | stable | FLJ33544  |
| 0.151274912 | stable | SGSM3     |
| 0.151357131 | stable | LOC645848 |

DEG.infomation

|             |        |           |
|-------------|--------|-----------|
| 0.151363201 | stable | PDP2      |
| 0.151572957 | stable | LOC647571 |
| 0.151648753 | stable | C10ORF73  |
| 0.151697309 | stable | LOC256374 |
| 0.151751921 | stable | LOC730456 |
| 0.151751921 | stable | NTRK1     |
| 0.151841182 | stable | SERPINB6  |
| 0.151841182 | stable | CCDC18    |
| 0.151841182 | stable | GK2       |
| 0.151841182 | stable | LOC729047 |
| 0.15185354  | stable | SLC6A5    |
| 0.151885144 | stable | GORASP2   |
| 0.151885144 | stable | ALKBH6    |
| 0.151996584 | stable | EFCBP1    |
| 0.152025336 | stable | KIR2DS3   |
| 0.152025336 | stable | EIF2B5    |
| 0.1520721   | stable | LOC647340 |
| 0.152074602 | stable | GTF2H4    |
| 0.152097687 | stable | FAM29A    |
| 0.152243505 | stable | LOC646817 |
| 0.15227071  | stable | MAN2B2    |
| 0.152329647 | stable | RSPRY1    |
| 0.152510486 | stable | ZNF212    |
| 0.152632809 | stable | LOC647974 |
| 0.152797119 | stable | C10ORF53  |
| 0.15282562  | stable | CXORF40B  |
| 0.15289188  | stable | C15ORF29  |
| 0.152997299 | stable | DHRS9     |
| 0.153104633 | stable | NLRP14    |
| 0.153104633 | stable | FAM86C    |
| 0.153277449 | stable | CPXCR1    |
| 0.153372793 | stable | HIST2H2AB |
| 0.153388262 | stable | CCDC44    |
| 0.153427384 | stable | SLC9A7    |
| 0.153487648 | stable | ZUFSP     |
| 0.153508583 | stable | C1ORF86   |
| 0.153544441 | stable | BCAS2     |
| 0.153737664 | stable | ERAL1     |
| 0.15376248  | stable | PIAS3     |
| 0.153874251 | stable | KIRREL3   |
| 0.153947625 | stable | LOC285733 |
| 0.153947625 | stable | ZNF483    |
| 0.153947625 | stable | LOC729715 |
| 0.153947625 | stable | ATG16L2   |
| 0.154115815 | stable | LOC645218 |
| 0.154115815 | stable | LOC442251 |
| 0.154243696 | stable | ABCC13    |
| 0.154354998 | stable | FLJ34503  |
| 0.154401107 | stable | PPAPDC1B  |
| 0.154428632 | stable | LOC649923 |
| 0.154531545 | stable | ZNF222    |

## DEG.infomation

|             |        |           |
|-------------|--------|-----------|
| 0.154556686 | stable | ABCC5     |
| 0.154674587 | stable | ZFP64     |
| 0.154696518 | stable | DNAJA3    |
| 0.154737859 | stable | LOC645048 |
| 0.154766425 | stable | LOC730262 |
| 0.154777268 | stable | RNF128    |
| 0.154881384 | stable | FLJ10916  |
| 0.154947598 | stable | GNE       |
| 0.155008733 | stable | RBMY1E    |
| 0.1550279   | stable | KIAA1539  |
| 0.155143596 | stable | C16ORF84  |
| 0.155143596 | stable | PPFIA1    |
| 0.15524969  | stable | LOC652637 |
| 0.155263458 | stable | EYA2      |
| 0.155351723 | stable | LOC142937 |
| 0.155495882 | stable | CELSR2    |
| 0.155682631 | stable | LOC642602 |
| 0.155683226 | stable | SLITRK6   |
| 0.155797451 | stable | SKIV2L    |
| 0.155931284 | stable | CEP27     |
| 0.155985884 | stable | WDR51B    |
| 0.15599969  | stable | C10ORF116 |
| 0.156179647 | stable | P76       |
| 0.156182541 | stable | AMBN      |
| 0.156295194 | stable | KRI1      |
| 0.156295194 | stable | LOC283932 |
| 0.156295194 | stable | LOC646009 |
| 0.156381296 | stable | CCR3      |
| 0.15652216  | stable | PRR19     |
| 0.156833501 | stable | SERPINB2  |
| 0.156955562 | stable | LOC644026 |
| 0.156955562 | stable | C11ORF57  |
| 0.15713117  | stable | LOC387820 |
| 0.157150666 | stable | GALNT1    |
| 0.157217283 | stable | CD300LF   |
| 0.157246369 | stable | GPR108    |
| 0.157271562 | stable | ARL16     |
| 0.157282915 | stable | H1FX      |
| 0.157545046 | stable | OR51V1    |
| 0.157569778 | stable | KIAA2018  |
| 0.157821889 | stable | ANKS1B    |
| 0.15789393  | stable | FTSJ2     |
| 0.15789393  | stable | ALPP      |
| 0.157949293 | stable | MPPED1    |
| 0.157985346 | stable | PRKAR2A   |
| 0.157985346 | stable | RAD50     |
| 0.157985346 | stable | CROT      |
| 0.158023646 | stable | RBL1      |
| 0.158023646 | stable | RFC2      |
| 0.158191277 | stable | LOC642809 |
| 0.15826408  | stable | PRKD2     |

## DEG.infomation

|             |        |           |
|-------------|--------|-----------|
| 0.158323339 | stable | LOC401068 |
| 0.158375511 | stable | TMEM30A   |
| 0.158381308 | stable | OR4F5     |
| 0.158384578 | stable | LOC644413 |
| 0.158472615 | stable | MRPS30    |
| 0.158506885 | stable | RPL21     |
| 0.158556953 | stable | MET       |
| 0.158556953 | stable | ERC1      |
| 0.158607141 | stable | RC3H2     |
| 0.158764399 | stable | HYAL4     |
| 0.158805237 | stable | RPL31     |
| 0.159004451 | stable | PQLC3     |
| 0.159052341 | stable | TYW1      |
| 0.159132596 | stable | RSHL3     |
| 0.159173411 | stable | SMEK3P    |
| 0.159222944 | stable | PEX10     |
| 0.159228852 | stable | HRG       |
| 0.159270042 | stable | SUZ12P    |
| 0.159362687 | stable | LOC649260 |
| 0.159367134 | stable | DPT       |
| 0.159428334 | stable | FAM177A1  |
| 0.159428334 | stable | DMRTA1    |
| 0.159428334 | stable | LOC642104 |
| 0.159484169 | stable | NECAB2    |
| 0.159509966 | stable | LOC732172 |
| 0.159509966 | stable | FAM169B   |
| 0.159593595 | stable | LUZP5     |
| 0.159737185 | stable | LOC391092 |
| 0.159740539 | stable | LOC652616 |
| 0.159785147 | stable | HACE1     |
| 0.159785147 | stable | LOC652344 |
| 0.159885674 | stable | LOC647200 |
| 0.159891402 | stable | IER5L     |
| 0.159891402 | stable | LOC132706 |
| 0.160197389 | stable | LOC651017 |
| 0.160226572 | stable | MRAP      |
| 0.16028269  | stable | LOC645336 |
| 0.160463908 | stable | FLJ11151  |
| 0.160474761 | stable | FKBP1B    |
| 0.160508438 | stable | LOC651686 |
| 0.160590496 | stable | CCDC84    |
| 0.160683347 | stable | POLR2K    |
| 0.160704693 | stable | LOC388564 |
| 0.160807357 | stable | LOC641992 |
| 0.160942689 | stable | ZNF3      |
| 0.160942689 | stable | GRIK4     |
| 0.161004186 | stable | H19       |
| 0.161033189 | stable | SLIT3     |
| 0.16105001  | stable | BOAT      |
| 0.161065286 | stable | RTP1      |
| 0.161126486 | stable | STRN3     |



DEG.infomation

|             |        |            |
|-------------|--------|------------|
| 0.161126486 | stable | SS18L1     |
| 0.161460012 | stable | WFDC11     |
| 0.161466107 | stable | PLXNA4B    |
| 0.161468147 | stable | PPP1R16A   |
| 0.161468147 | stable | KANK2      |
| 0.161588952 | stable | MRGPRX1    |
| 0.16167371  | stable | TREM1      |
| 0.161697684 | stable | FLJ45256   |
| 0.161700042 | stable | IZUMO1     |
| 0.161703914 | stable | LOC643550  |
| 0.161751599 | stable | LOC653238  |
| 0.161797193 | stable | FTHL8      |
| 0.161838893 | stable | UBXN11     |
| 0.162075974 | stable | FLJ10324   |
| 0.162175196 | stable | SULT1C3    |
| 0.162193978 | stable | TNKS       |
| 0.162201842 | stable | LOC642212  |
| 0.162251529 | stable | DEFB131    |
| 0.162296819 | stable | CPLX1      |
| 0.162296819 | stable | LOC731432  |
| 0.162380113 | stable | C1ORF132   |
| 0.162478198 | stable | ANXA4      |
| 0.162667906 | stable | LOC645968  |
| 0.16281075  | stable | ATP2B1     |
| 0.162860116 | stable | ALDH1A1    |
| 0.162959564 | stable | DUXAP3     |
| 0.162960929 | stable | LOC645197  |
| 0.162980129 | stable | KIAA1622   |
| 0.163060301 | stable | KITLG      |
| 0.163060301 | stable | CCDC144A   |
| 0.163133877 | stable | VPS18      |
| 0.163155272 | stable | GLRA1      |
| 0.163155272 | stable | BAT4       |
| 0.163182012 | stable | FAM149A    |
| 0.163185634 | stable | LOC645436  |
| 0.163185634 | stable | LOC642424  |
| 0.163222121 | stable | SNORD116-2 |
| 0.163434812 | stable | VLDLR      |
| 0.163477978 | stable | HES1       |
| 0.163799224 | stable | CAPZA1     |
| 0.163799224 | stable | USP6NL     |
| 0.163799224 | stable | LOC344382  |
| 0.16388575  | stable | COQ10B     |
| 0.16395923  | stable | C15ORF33   |
| 0.164014008 | stable | SLC10A3    |
| 0.164092773 | stable | LOC652783  |
| 0.16431044  | stable | LCT        |
| 0.164390909 | stable | MAGEB4     |
| 0.164390909 | stable | LOC653564  |
| 0.164390909 | stable | PRIM1      |
| 0.164419032 | stable | LOC645367  |

## DEG.infomation

|             |        |           |
|-------------|--------|-----------|
| 0.164427229 | stable | AHR       |
| 0.164427229 | stable | LOC653034 |
| 0.16450525  | stable | LOC649987 |
| 0.164587707 | stable | LOC644577 |
| 0.164748124 | stable | LOC644343 |
| 0.164790066 | stable | PRDM5     |
| 0.164964632 | stable | VCX       |
| 0.165037707 | stable | LOC388494 |
| 0.165123154 | stable | MTM1      |
| 0.165139619 | stable | S1PR2     |
| 0.165172943 | stable | LOC641806 |
| 0.165187045 | stable | HEY1      |
| 0.165201638 | stable | GIN52     |
| 0.165586275 | stable | TSSK1B    |
| 0.165586275 | stable | GIYD2     |
| 0.165586275 | stable | LAMA3     |
| 0.165586275 | stable | HOXC4     |
| 0.165586275 | stable | LOC650137 |
| 0.165586275 | stable | WDR25     |
| 0.165586275 | stable | GCDH      |
| 0.165594351 | stable | FOX11     |
| 0.165622345 | stable | SYNPO     |
| 0.165909247 | stable | EPHA7     |
| 0.165965959 | stable | SPPL3     |
| 0.166155076 | stable | ATP6V0E1  |
| 0.166162464 | stable | LOC255809 |
| 0.166298828 | stable | LONRF3    |
| 0.166299669 | stable | ARF5      |
| 0.16630365  | stable | C10ORF115 |
| 0.166536621 | stable | LOC649632 |
| 0.166633535 | stable | KCNMB4    |
| 0.166797782 | stable | GNLY      |
| 0.167130026 | stable | LOC645582 |
| 0.167130026 | stable | OR2J3     |
| 0.167200748 | stable | LOC646783 |
| 0.167200748 | stable | AFG3L2    |
| 0.167551409 | stable | LOC652373 |
| 0.167961288 | stable | RIT1      |
| 0.168051643 | stable | CRB3      |
| 0.168066648 | stable | ZC3H18    |
| 0.168149243 | stable | LOC441655 |
| 0.168180884 | stable | TBC1D8B   |
| 0.168218259 | stable | NKX6-3    |
| 0.168219109 | stable | MATN1     |
| 0.168219109 | stable | SAMD1     |
| 0.168267786 | stable | LOC441511 |
| 0.168288935 | stable | DHRS4     |
| 0.168298768 | stable | PIAS1     |
| 0.168483836 | stable | ATP11B    |
| 0.168522058 | stable | FLJ46380  |
| 0.168523923 | stable | HRH4      |

## DEG.infomation

|             |        |              |
|-------------|--------|--------------|
| 0.168579775 | stable | RRAD         |
| 0.168621406 | stable | LOC643002    |
| 0.168830067 | stable | DKFZP761E198 |
| 0.168854059 | stable | SLC25A26     |
| 0.168978279 | stable | MAPKAPK3     |
| 0.169039295 | stable | COPS2        |
| 0.169125926 | stable | LASS5        |
| 0.169125926 | stable | LOC643043    |
| 0.169202358 | stable | DSCR6        |
| 0.169230048 | stable | CD1B         |
| 0.169245987 | stable | OR9G4        |
| 0.16930678  | stable | MOBP         |
| 0.169474699 | stable | LOC647384    |
| 0.169490758 | stable | LOC650363    |
| 0.169683972 | stable | LOC645669    |
| 0.169683972 | stable | LOC646746    |
| 0.169845699 | stable | FLJ26850     |
| 0.169868663 | stable | TRIM50       |
| 0.169868663 | stable | SPRR4        |
| 0.169934496 | stable | ILK          |
| 0.169947028 | stable | PPID         |
| 0.169995658 | stable | GALNS        |
| 0.170081324 | stable | CCDC65       |
| 0.170260967 | stable | ZC3H10       |
| 0.170374247 | stable | PELI2        |
| 0.170381702 | stable | FLJ45224     |
| 0.170440714 | stable | WDR20        |
| 0.170631164 | stable | LOC554223    |
| 0.170772039 | stable | FLJ42291     |
| 0.170820953 | stable | LOC284064    |
| 0.170894883 | stable | ZXDC         |
| 0.170947813 | stable | LOC402508    |
| 0.171096511 | stable | C21ORF67     |
| 0.171096511 | stable | NKAP         |
| 0.171120715 | stable | WHDC1L1      |
| 0.171186809 | stable | SNX5         |
| 0.171305606 | stable | C4ORF44      |
| 0.171309546 | stable | CPZ          |
| 0.171365572 | stable | LOC387941    |
| 0.171439231 | stable | LOC645711    |
| 0.171439231 | stable | DGCR5        |
| 0.171657942 | stable | CNOT6L       |
| 0.171710447 | stable | CA12         |
| 0.171890812 | stable | LOC338797    |
| 0.171890812 | stable | CAMSAP1      |
| 0.171890812 | stable | LOC148766    |
| 0.171890812 | stable | FABP7        |
| 0.171890812 | stable | LOC646309    |
| 0.171890812 | stable | SLC34A2      |
| 0.171890812 | stable | PDDC1        |
| 0.171927242 | stable | GRIA2        |

## DEG.infomation

|             |        |           |
|-------------|--------|-----------|
| 0.172039663 | stable | CEP250    |
| 0.172064066 | stable | RNF175    |
| 0.172101492 | stable | TMC7      |
| 0.172158068 | stable | INO80C    |
| 0.172171437 | stable | GOSR2     |
| 0.17217705  | stable | INTS4     |
| 0.172268172 | stable | NRIP2     |
| 0.172299017 | stable | CXORF1    |
| 0.172299017 | stable | TLE6      |
| 0.172385608 | stable | ANKRD55   |
| 0.172489183 | stable | HMG2L1    |
| 0.172505906 | stable | TBC1D3G   |
| 0.172545321 | stable | DSCR3     |
| 0.172545321 | stable | DMC1      |
| 0.172755148 | stable | C18ORF2   |
| 0.172822528 | stable | RNF26     |
| 0.172936503 | stable | LOC284821 |
| 0.173186799 | stable | ZDHHC21   |
| 0.173186799 | stable | PRAMEF16  |
| 0.173186799 | stable | PHLDB1    |
| 0.173241327 | stable | RCL1      |
| 0.173501162 | stable | CASC1     |
| 0.173517013 | stable | C6ORF160  |
| 0.173517013 | stable | CBLN2     |
| 0.173517013 | stable | SMC5      |
| 0.173555155 | stable | SDHALP1   |
| 0.173604319 | stable | KIF21B    |
| 0.173627693 | stable | IGSF2     |
| 0.173748624 | stable | BXDC5     |
| 0.173816524 | stable | WDR22     |
| 0.173816524 | stable | LOC120376 |
| 0.173829277 | stable | SPRN      |
| 0.173851021 | stable | C15ORF56  |
| 0.173855043 | stable | LOC402694 |
| 0.174124395 | stable | FAM21A    |
| 0.174124395 | stable | CDA       |
| 0.174164158 | stable | PCDHGC4   |
| 0.174267511 | stable | C20ORF135 |
| 0.174267511 | stable | TMEM188   |
| 0.174267511 | stable | RPS6KC1   |
| 0.174417027 | stable | INTS1     |
| 0.1746061   | stable | CAPN11    |
| 0.174608823 | stable | GTPBP4    |
| 0.17461805  | stable | LOC400968 |
| 0.17461805  | stable | QRICH1    |
| 0.174679889 | stable | FAM19A4   |
| 0.174679889 | stable | RBM7      |
| 0.174679889 | stable | ANXA9     |
| 0.174711986 | stable | CSNK1G1   |
| 0.174775389 | stable | MRPL12    |
| 0.174855127 | stable | CLRN1     |

## DEG.infomation

|             |        |           |
|-------------|--------|-----------|
| 0.174855127 | stable | PTCD3     |
| 0.175149899 | stable | HNRNPC    |
| 0.175164788 | stable | SRF       |
| 0.175164788 | stable | PITPNA    |
| 0.175164788 | stable | B4GALT6   |
| 0.175226947 | stable | INTS10    |
| 0.175226947 | stable | BAALC     |
| 0.175271621 | stable | LOC652392 |
| 0.175311583 | stable | SHANK1    |
| 0.175407812 | stable | LOC648638 |
| 0.175518574 | stable | MTHFD1    |
| 0.17559695  | stable | LOC641772 |
| 0.175620534 | stable | KRTAP10-7 |
| 0.175649516 | stable | CWC15     |
| 0.175649516 | stable | RPA1      |
| 0.175837352 | stable | CUGBP2    |
| 0.175890088 | stable | RPPH1     |
| 0.175890088 | stable | LOC255374 |
| 0.175930708 | stable | DBR1      |
| 0.175930708 | stable | LOC649404 |
| 0.175960977 | stable | LOC552891 |
| 0.176009236 | stable | COG2      |
| 0.176009236 | stable | ZNF324B   |
| 0.176065481 | stable | AAAS      |
| 0.176182517 | stable | ITGA1     |
| 0.176222213 | stable | C7ORF11   |
| 0.176308711 | stable | NRAP      |
| 0.176425131 | stable | PPIL5     |
| 0.176521299 | stable | LOC647103 |
| 0.176738644 | stable | PRSS8     |
| 0.176738644 | stable | RNF44     |
| 0.176738644 | stable | LOC200420 |
| 0.176738644 | stable | CDH1      |
| 0.176852995 | stable | LOC647919 |
| 0.176895076 | stable | GRIK3     |
| 0.176908806 | stable | LOC653127 |
| 0.17701107  | stable | LRRC15    |
| 0.177078959 | stable | VPS72     |
| 0.177228709 | stable | SNX14     |
| 0.177234276 | stable | CACNA1D   |
| 0.177454485 | stable | LOC647121 |
| 0.177704075 | stable | CLEC3B    |
| 0.177704075 | stable | LOC652251 |
| 0.177704075 | stable | DUX4C     |
| 0.177863189 | stable | NUP107    |
| 0.177876312 | stable | TESC      |
| 0.177913599 | stable | EXOC3L    |
| 0.177936388 | stable | HYMAI     |
| 0.177950973 | stable | LOC401915 |
| 0.177962412 | stable | CXORF24   |
| 0.177962412 | stable | LOC650008 |

## DEG.infomation

|             |        |           |
|-------------|--------|-----------|
| 0.177962412 | stable | SULT1A1   |
| 0.178126664 | stable | SCNN1B    |
| 0.178225645 | stable | VAPA      |
| 0.178225645 | stable | FLJ40722  |
| 0.178451809 | stable | LOC390378 |
| 0.178451809 | stable | SIGLEC11  |
| 0.178754253 | stable | TUFM      |
| 0.1787553   | stable | POLR2J    |
| 0.178856147 | stable | H2BFWT    |
| 0.178877424 | stable | DNASE1L1  |
| 0.178938036 | stable | NBPF3     |
| 0.179006273 | stable | ZNF568    |
| 0.179068607 | stable | FGF2      |
| 0.179068607 | stable | HSPE1     |
| 0.179124154 | stable | CSMD1     |
| 0.179154522 | stable | CHES1     |
| 0.179392076 | stable | RGNEF     |
| 0.17963131  | stable | SNX33     |
| 0.179634141 | stable | TBC1D22B  |
| 0.179686549 | stable | LOC642154 |
| 0.179893529 | stable | GAL3ST4   |
| 0.179937542 | stable | ZNF414    |
| 0.179947038 | stable | ATG9A     |
| 0.179963464 | stable | WWOX      |
| 0.179963464 | stable | FAM43A    |
| 0.179977182 | stable | LOC730426 |
| 0.179977182 | stable | LOC644655 |
| 0.180158512 | stable | LOC91661  |
| 0.180260989 | stable | HSH2D     |
| 0.180301393 | stable | SEPT10    |
| 0.18030785  | stable | C14ORF126 |
| 0.18030785  | stable | LOC143666 |
| 0.18030785  | stable | LOC645032 |
| 0.180314196 | stable | NFIX      |
| 0.180353921 | stable | FTHL3P    |
| 0.180353921 | stable | WNT5A     |
| 0.180357202 | stable | OR6N2     |
| 0.180408169 | stable | ATXN1     |
| 0.18042582  | stable | SFT2D3    |
| 0.180573357 | stable | LOC648851 |
| 0.180573357 | stable | FAM7A1    |
| 0.180682162 | stable | LOC642387 |
| 0.180760208 | stable | C3ORF62   |
| 0.180760208 | stable | SPON1     |
| 0.180777258 | stable | PLAC8L1   |
| 0.180828269 | stable | CAMK2N1   |
| 0.180959007 | stable | GBA3      |
| 0.180968956 | stable | SNORD25   |
| 0.180968956 | stable | SNORA25   |
| 0.180970927 | stable | RPL35     |
| 0.180985947 | stable | DYNLL2    |

## DEG.infomation

|             |        |           |
|-------------|--------|-----------|
| 0.181022054 | stable | PLA2R1    |
| 0.181022054 | stable | APH1A     |
| 0.18105029  | stable | PLSCR2    |
| 0.18105029  | stable | ADAMTSL4  |
| 0.181130266 | stable | UBE2N     |
| 0.181177101 | stable | HCG27     |
| 0.181200816 | stable | STAT5B    |
| 0.181560177 | stable | LOC390367 |
| 0.181725482 | stable | NHEJ1     |
| 0.181747115 | stable | DSE       |
| 0.181835117 | stable | FAM5B     |
| 0.181846388 | stable | LOC647166 |
| 0.181872016 | stable | LOC646507 |
| 0.18195791  | stable | CLCN3     |
| 0.18195791  | stable | CNTN2     |
| 0.18198699  | stable | PADI3     |
| 0.18198699  | stable | LOC642855 |
| 0.182280856 | stable | WDR89     |
| 0.182280856 | stable | MTIF3     |
| 0.182286134 | stable | ZFP28     |
| 0.182713439 | stable | GPHB5     |
| 0.182713439 | stable | GALNT3    |
| 0.182744697 | stable | C10ORF12  |
| 0.182819978 | stable | LOC653766 |
| 0.182926452 | stable | PIWIL2    |
| 0.18311247  | stable | UBR4      |
| 0.183302724 | stable | FLJ10357  |
| 0.183302724 | stable | FASTKD5   |
| 0.183321695 | stable | GTF2IRD2B |
| 0.183403575 | stable | LOC390466 |
| 0.183524908 | stable | FLJ43980  |
| 0.183568815 | stable | LEREPO4   |
| 0.183692896 | stable | LOC652126 |
| 0.183713262 | stable | DUOXA2    |
| 0.183716122 | stable | C8ORF22   |
| 0.183794715 | stable | PDE8A     |
| 0.183794715 | stable | TRPM4     |
| 0.183960314 | stable | COQ2      |
| 0.184003961 | stable | TDRD7     |
| 0.184126219 | stable | C13ORF18  |
| 0.184176564 | stable | LDHC      |
| 0.184176564 | stable | CDH17     |
| 0.184176564 | stable | TUSC5     |
| 0.184254538 | stable | ACSL6     |
| 0.184414292 | stable | LIN37     |
| 0.184453121 | stable | USP53     |
| 0.184453121 | stable | RPS15A    |
| 0.184453121 | stable | C6ORF103  |
| 0.184453121 | stable | GRIA1     |
| 0.184617782 | stable | TELO2     |
| 0.184751634 | stable | SLC17A4   |

## DEG.infomation

|             |        |           |
|-------------|--------|-----------|
| 0.184803438 | stable | SLC7A10   |
| 0.184882721 | stable | KRTAP13-3 |
| 0.184891117 | stable | QSER1     |
| 0.184981868 | stable | SLC17A2   |
| 0.184981868 | stable | BHLHB5    |
| 0.185042849 | stable | RFXDC1    |
| 0.185159536 | stable | LOC651556 |
| 0.185164558 | stable | VSIG1     |
| 0.185170935 | stable | EPN3      |
| 0.185342478 | stable | ARHGEF10  |
| 0.185612117 | stable | CAPN12    |
| 0.185809294 | stable | FBXO27    |
| 0.185863812 | stable | PLCL2     |
| 0.186111779 | stable | HMG1L1    |
| 0.186199412 | stable | LOC644227 |
| 0.186269447 | stable | LOC642669 |
| 0.186426453 | stable | DEPDC4    |
| 0.186432707 | stable | GNG5      |
| 0.186505596 | stable | C10ORF132 |
| 0.186549144 | stable | CBLN1     |
| 0.186549144 | stable | LOC400506 |
| 0.186706173 | stable | LOC642282 |
| 0.186725964 | stable | PNKP      |
| 0.186747382 | stable | CSTF2T    |
| 0.186757697 | stable | RNF121    |
| 0.186757697 | stable | LOC649957 |
| 0.186814669 | stable | HSP90AA1  |
| 0.186842767 | stable | CST9      |
| 0.186904788 | stable | LOC652517 |
| 0.186923554 | stable | LOC648415 |
| 0.186923554 | stable | TMEM148   |
| 0.187003469 | stable | NRSN1     |
| 0.187214108 | stable | TNXA      |
| 0.18728528  | stable | LOC645312 |
| 0.187449635 | stable | LOC648997 |
| 0.187479757 | stable | USMG5     |
| 0.187479757 | stable | SLC35B4   |
| 0.187615772 | stable | LOC647104 |
| 0.187615772 | stable | LOC652534 |
| 0.18766756  | stable | LOC652704 |
| 0.18766756  | stable | PIGF      |
| 0.187715206 | stable | RAB3IP    |
| 0.187768913 | stable | LOC729021 |
| 0.187825697 | stable | SUPV3L1   |
| 0.187838897 | stable | RBM44     |
| 0.187862685 | stable | CORT      |
| 0.187862685 | stable | LOC391811 |
| 0.187911822 | stable | C14ORF143 |
| 0.187953804 | stable | LOC389748 |
| 0.188001582 | stable | RAD52     |
| 0.188033804 | stable | SYT7      |



## DEG.infomation

|             |        |           |
|-------------|--------|-----------|
| 0.188102196 | stable | GTSF1     |
| 0.18819818  | stable | LTB       |
| 0.188244704 | stable | HOXA2     |
| 0.188276932 | stable | IL3       |
| 0.188551152 | stable | STT3B     |
| 0.188551152 | stable | ETV5      |
| 0.188551152 | stable | LOC647592 |
| 0.188669832 | stable | C6ORF106  |
| 0.188753936 | stable | OR2D2     |
| 0.18882171  | stable | TEKT4     |
| 0.188872646 | stable | LDOC1     |
| 0.188877821 | stable | CDC42EP3  |
| 0.188877821 | stable | PGM1      |
| 0.189134877 | stable | VN1R1     |
| 0.189257444 | stable | MARS2     |
| 0.189257444 | stable | RPL24     |
| 0.189336852 | stable | ZNF682    |
| 0.189336852 | stable | TRMT6     |
| 0.189336852 | stable | TNFSF9    |
| 0.189355222 | stable | RDH13     |
| 0.189355222 | stable | LOC646266 |
| 0.189355222 | stable | RFP       |
| 0.189355222 | stable | LOC653778 |
| 0.189362325 | stable | DNAJB14   |
| 0.189362325 | stable | LOC285382 |
| 0.189362325 | stable | LOC441582 |
| 0.18951272  | stable | TEKT3     |
| 0.18951272  | stable | MFSD11    |
| 0.189643239 | stable | LOC642321 |
| 0.189733845 | stable | UBA6      |
| 0.189733845 | stable | ZSWIM2    |
| 0.189838246 | stable | PI4K2A    |
| 0.189860934 | stable | LOC643201 |
| 0.189929156 | stable | LOC402251 |
| 0.190013823 | stable | CABP7     |
| 0.190038048 | stable | DEK       |
| 0.190091237 | stable | APOC3     |
| 0.190396588 | stable | ASMT      |
| 0.190439139 | stable | LIF       |
| 0.190693688 | stable | LOC644979 |
| 0.190849532 | stable | OR13C8    |
| 0.190884098 | stable | NXF5      |
| 0.190970252 | stable | ADCYAP1   |
| 0.19098404  | stable | LOC647778 |
| 0.191074993 | stable | LOC652898 |
| 0.191077564 | stable | ANP32B    |
| 0.191153121 | stable | LOC643176 |
| 0.191282431 | stable | DENND2C   |
| 0.191399361 | stable | TTK       |
| 0.191446401 | stable | GPR42     |
| 0.191446401 | stable | NOTCH2    |

## DEG.infomation

|             |        |           |
|-------------|--------|-----------|
| 0.191491537 | stable | PON1      |
| 0.19153569  | stable | C15ORF44  |
| 0.191673159 | stable | RPH3A     |
| 0.191711555 | stable | SLC22A17  |
| 0.191766952 | stable | FAM24A    |
| 0.191766952 | stable | TMEM16B   |
| 0.191766952 | stable | OR6C76    |
| 0.19183959  | stable | DCT       |
| 0.192000317 | stable | SNORD83A  |
| 0.192182698 | stable | ME3       |
| 0.192525786 | stable | TSTA3     |
| 0.192525786 | stable | ELF5      |
| 0.192525798 | stable | FAM109A   |
| 0.192525798 | stable | ZNF681    |
| 0.192834755 | stable | OSTBETA   |
| 0.193004101 | stable | LOC388755 |
| 0.193044017 | stable | LOC651073 |
| 0.193044017 | stable | FAM162A   |
| 0.193081243 | stable | NPPB      |
| 0.193084094 | stable | GPN1      |
| 0.193093103 | stable | SNORD109B |
| 0.19315834  | stable | RUSC2     |
| 0.193255381 | stable | LTBP4     |
| 0.193410679 | stable | USP11     |
| 0.193629457 | stable | LOC730510 |
| 0.193629457 | stable | LOC644412 |
| 0.19365611  | stable | POLR3C    |
| 0.193894618 | stable | PRM1      |
| 0.193894618 | stable | LCE5A     |
| 0.193983915 | stable | RSHL1     |
| 0.194001917 | stable | C22ORF9   |
| 0.194119446 | stable | TMEM98    |
| 0.194158752 | stable | NKX2-8    |
| 0.194158752 | stable | CACNA1I   |
| 0.194158752 | stable | OR7E37P   |
| 0.194200283 | stable | AAMP      |
| 0.194236951 | stable | LOC440978 |
| 0.194254408 | stable | CDKN2B    |
| 0.194254408 | stable | PTPRC     |
| 0.194409803 | stable | RALGPS2   |
| 0.194745372 | stable | AP4S1     |
| 0.194786685 | stable | DNAJC8    |
| 0.194786685 | stable | LOC728653 |
| 0.194787587 | stable | SLC4A5    |
| 0.194883825 | stable | MEGF8     |
| 0.194892545 | stable | PSMD13    |
| 0.194912568 | stable | CHMP6     |
| 0.194969929 | stable | FAM115A   |
| 0.195117552 | stable | TMEM151A  |
| 0.195277814 | stable | VEPH1     |
| 0.19529315  | stable | ASB14     |

DEG.infomation

|             |        |              |
|-------------|--------|--------------|
| 0.195326837 | stable | LOC651333    |
| 0.195384684 | stable | C15ORF27     |
| 0.195477069 | stable | ELL3         |
| 0.195477069 | stable | BPY2         |
| 0.1955549   | stable | ADAMTSL1     |
| 0.195608736 | stable | UTP14A       |
| 0.195697655 | stable | CCL4         |
| 0.195707957 | stable | BRSK2        |
| 0.195775561 | stable | LOC643669    |
| 0.195779059 | stable | LOC653050    |
| 0.195846306 | stable | C9ORF117     |
| 0.19586323  | stable | FBLN7        |
| 0.19586323  | stable | LOC96610     |
| 0.195911617 | stable | SFT2D1       |
| 0.195911617 | stable | LOC642573    |
| 0.195911617 | stable | LOC646302    |
| 0.196201152 | stable | CLCN6        |
| 0.196269525 | stable | FNDC5        |
| 0.196269525 | stable | RNF216       |
| 0.196335339 | stable | HSPC047      |
| 0.196413385 | stable | EEF2         |
| 0.196413385 | stable | NOMO3        |
| 0.196413385 | stable | SREBF2       |
| 0.196548076 | stable | LOC442448    |
| 0.196548076 | stable | GDE1         |
| 0.196635207 | stable | PIGN         |
| 0.196877499 | stable | SEP15        |
| 0.196895556 | stable | LOC283392    |
| 0.197258101 | stable | ZNF800       |
| 0.197258101 | stable | DKFZP451A211 |
| 0.197258101 | stable | MFAP3L       |
| 0.197317435 | stable | APOA2        |
| 0.197343211 | stable | GPM6B        |
| 0.197493749 | stable | AGGF1        |
| 0.197503473 | stable | IFNA21       |
| 0.197531177 | stable | C7ORF43      |
| 0.197680702 | stable | FAM58B       |
| 0.197728324 | stable | PRKACB       |
| 0.197853037 | stable | TCF23        |
| 0.198068015 | stable | MYO18A       |
| 0.198068015 | stable | LOC643311    |
| 0.198080486 | stable | LOC642236    |
| 0.198091609 | stable | FCF1         |
| 0.198138232 | stable | LOC652278    |
| 0.198247635 | stable | CUEDC2       |
| 0.198310078 | stable | LOC644642    |
| 0.198472186 | stable | PHF23        |
| 0.198514827 | stable | LOC644764    |
| 0.198552711 | stable | LOC647415    |
| 0.198638142 | stable | ZNF813       |
| 0.198723557 | stable | TMCO4        |

## DEG.infomation

|             |        |           |
|-------------|--------|-----------|
| 0.198802088 | stable | ZNF778    |
| 0.198882805 | stable | LOC254559 |
| 0.199022425 | stable | RAP1B     |
| 0.199072314 | stable | LOC653807 |
| 0.199078677 | stable | C21ORF57  |
| 0.199100438 | stable | LOC653480 |
| 0.199328575 | stable | LOC646533 |
| 0.19941806  | stable | CYP20A1   |
| 0.199451581 | stable | OR8D2     |
| 0.199568718 | stable | LOC644264 |
| 0.199568718 | stable | LOC645151 |
| 0.199751226 | stable | TTYH2     |
| 0.199795297 | stable | MBD2      |
| 0.199795297 | stable | CCDC107   |
| 0.199795297 | stable | LOC646348 |
| 0.199795297 | stable | LOH12CR1  |
| 0.2002194   | stable | LOC388780 |
| 0.200261359 | stable | ZNF423    |
| 0.200353185 | stable | ATP2B3    |
| 0.200390129 | stable | C5ORF22   |
| 0.200668298 | stable | FLJ36208  |
| 0.20069544  | stable | LOC643032 |
| 0.200732932 | stable | NAP1L4    |
| 0.200732932 | stable | ADAM21    |
| 0.201156871 | stable | HEPACAM   |
| 0.201461464 | stable | LOC388153 |
| 0.20159018  | stable | C3ORF42   |
| 0.201648019 | stable | CEP135    |
| 0.201752214 | stable | LOC645478 |
| 0.201893453 | stable | RPL6      |
| 0.201893453 | stable | CNNM2     |
| 0.20207789  | stable | APOBEC3G  |
| 0.202131646 | stable | DDX18     |
| 0.202131922 | stable | ZNF623    |
| 0.202153294 | stable | LOC389833 |
| 0.20224069  | stable | DTD1      |
| 0.202370448 | stable | LOC642178 |
| 0.202417863 | stable | RPP25     |
| 0.202520151 | stable | XRCC1     |
| 0.202520151 | stable | LOC642653 |
| 0.202560612 | stable | LOC654002 |
| 0.202560612 | stable | ZNF514    |
| 0.202625357 | stable | SYT13     |
| 0.202625357 | stable | MKRN3     |
| 0.202759095 | stable | ZNF702P   |
| 0.202759095 | stable | LOC647308 |
| 0.202759095 | stable | DC36      |
| 0.202854842 | stable | LOC652570 |
| 0.202991545 | stable | FILIP1L   |
| 0.203198491 | stable | GSC2      |
| 0.203202522 | stable | PHOX2A    |

## DEG.infomation

|             |        |           |
|-------------|--------|-----------|
| 0.203265077 | stable | KIAA1600  |
| 0.203265077 | stable | KLK1      |
| 0.203357582 | stable | SEMA7A    |
| 0.20369848  | stable | PCOLCE    |
| 0.203742431 | stable | SATB2     |
| 0.203742431 | stable | LOC731365 |
| 0.203830138 | stable | CDK8      |
| 0.204363708 | stable | LOC389607 |
| 0.204363708 | stable | STX17     |
| 0.204373877 | stable | LOC642558 |
| 0.204659628 | stable | LCK       |
| 0.204704173 | stable | C8ORF77   |
| 0.204704173 | stable | WDR72     |
| 0.204704173 | stable | APOBEC3D  |
| 0.204778166 | stable | LOC647910 |
| 0.204778166 | stable | LOC440359 |
| 0.204778166 | stable | FAM62C    |
| 0.204778166 | stable | HSPA1A    |
| 0.20498067  | stable | LOC643018 |
| 0.205011282 | stable | ZNF445    |
| 0.205011282 | stable | C8ORF59   |
| 0.205082772 | stable | SEMA4G    |
| 0.205100694 | stable | LOC440067 |
| 0.205158401 | stable | LOC648278 |
| 0.205303545 | stable | C4ORF12   |
| 0.205569697 | stable | HYLS1     |
| 0.205572621 | stable | LCE1A     |
| 0.20560265  | stable | COL8A2    |
| 0.20575051  | stable | LOC651429 |
| 0.205751781 | stable | LOC654230 |
| 0.205755237 | stable | LOC643085 |
| 0.205864755 | stable | LOC645210 |
| 0.206284034 | stable | NUP88     |
| 0.206379032 | stable | VSNL1     |
| 0.206456905 | stable | RAC3      |
| 0.206464299 | stable | LOC652357 |
| 0.206472395 | stable | LOC400796 |
| 0.206576672 | stable | LOC644066 |
| 0.206807535 | stable | FLJ37201  |
| 0.206814867 | stable | FRMPD2L2  |
| 0.206857356 | stable | CNIH      |
| 0.206862253 | stable | PDE6G     |
| 0.206862253 | stable | LOC644294 |
| 0.207325609 | stable | DNAJC11   |
| 0.207325609 | stable | OR5W2     |
| 0.207325609 | stable | FBN1      |
| 0.207325609 | stable | FLJ40292  |
| 0.207325609 | stable | AURKAPS1  |
| 0.207325609 | stable | GTSCR1    |
| 0.20761332  | stable | CCDC102A  |
| 0.207764798 | stable | NEU2      |

## DEG.infomation

|             |        |           |
|-------------|--------|-----------|
| 0.207764798 | stable | LOC646114 |
| 0.207764798 | stable | LOC643837 |
| 0.20784406  | stable | GNG12     |
| 0.20784406  | stable | SAPS2     |
| 0.207846802 | stable | LOC652578 |
| 0.207954688 | stable | CCDC103   |
| 0.207954688 | stable | ALDOB     |
| 0.208061224 | stable | LCA5      |
| 0.208253726 | stable | WBSCR27   |
| 0.208273326 | stable | PLEKHF2   |
| 0.208489811 | stable | LOC442028 |
| 0.20864872  | stable | LOC650840 |
| 0.20875296  | stable | HSD17B13  |
| 0.208776857 | stable | ITGB4     |
| 0.208857232 | stable | ARL13A    |
| 0.208890025 | stable | LOC652614 |
| 0.208921262 | stable | TLK2      |
| 0.209084286 | stable | FLJ16369  |
| 0.209247372 | stable | AIRE      |
| 0.209247372 | stable | C10ORF10  |
| 0.209599576 | stable | LOC652568 |
| 0.209648398 | stable | APOBEC2   |
| 0.209680049 | stable | TNRC6C    |
| 0.209725627 | stable | IDH3B     |
| 0.20994751  | stable | AKT1S1    |
| 0.210078581 | stable | WNK2      |
| 0.210114421 | stable | SCGB3A1   |
| 0.210114421 | stable | LOC441737 |
| 0.210135477 | stable | IL16      |
| 0.210152054 | stable | TBCA      |
| 0.210157555 | stable | LOC644705 |
| 0.210282953 | stable | VPS53     |
| 0.210282953 | stable | OR4C16    |
| 0.210315585 | stable | LOC646128 |
| 0.210369412 | stable | LTB4R2    |
| 0.210446071 | stable | MBTD1     |
| 0.210626345 | stable | IL17B     |
| 0.210672428 | stable | FBXO44    |
| 0.210961081 | stable | C2ORF77   |
| 0.210972254 | stable | ZNF41     |
| 0.210972254 | stable | ERP27     |
| 0.211001576 | stable | LOC158381 |
| 0.211006991 | stable | CLIP1     |
| 0.211006991 | stable | MRPS23    |
| 0.211006991 | stable | HINT1     |
| 0.211166767 | stable | ARID5B    |
| 0.211314393 | stable | LOC401622 |
| 0.211314393 | stable | OR4K15    |
| 0.2113574   | stable | STK11     |
| 0.211388962 | stable | INPP5F    |
| 0.211518537 | stable | C1ORF56   |

## DEG.infomation

|             |        |           |
|-------------|--------|-----------|
| 0.21167386  | stable | LOC646422 |
| 0.211677428 | stable | LYPLA2P1  |
| 0.211677428 | stable | C1ORF189  |
| 0.211755958 | stable | FAHD2B    |
| 0.211755958 | stable | INTS8     |
| 0.211755958 | stable | LIG1      |
| 0.211827762 | stable | CCDC85A   |
| 0.211993329 | stable | NPLOC4    |
| 0.211993329 | stable | SNX4      |
| 0.212298156 | stable | ASCL2     |
| 0.212396943 | stable | LOC283970 |
| 0.212494221 | stable | PLEKHM1   |
| 0.212672037 | stable | PLEKHM3   |
| 0.212720295 | stable | OR6C4     |
| 0.212818703 | stable | SUMO1P1   |
| 0.212818703 | stable | LOC391045 |
| 0.212903496 | stable | RBP3      |
| 0.212903496 | stable | TRIP12    |
| 0.213025192 | stable | LOC402644 |
| 0.213025192 | stable | LOC653276 |
| 0.213038517 | stable | NUP153    |
| 0.213072818 | stable | LOC653125 |
| 0.21308422  | stable | LIN52     |
| 0.21311039  | stable | GPR25     |
| 0.213207443 | stable | LOC652342 |
| 0.213268296 | stable | LOC650905 |
| 0.213348338 | stable | LOC652796 |
| 0.213415103 | stable | ABT1      |
| 0.213465872 | stable | ANKRD47   |
| 0.213525578 | stable | LOC442454 |
| 0.213526118 | stable | PCGF3     |
| 0.21374849  | stable | LOC652453 |
| 0.213797288 | stable | SULT1C4   |
| 0.213938064 | stable | LOC645322 |
| 0.213938064 | stable | GALC      |
| 0.213952879 | stable | BGLAP     |
| 0.214102875 | stable | CBX4      |
| 0.214165584 | stable | FCAR      |
| 0.214274087 | stable | PMCHL1    |
| 0.21448623  | stable | LGALS1    |
| 0.214705432 | stable | KAT2A     |
| 0.214705432 | stable | TMEM162   |
| 0.214746523 | stable | STAG3     |
| 0.214779954 | stable | GIP       |
| 0.214837058 | stable | LOC643977 |
| 0.214906493 | stable | STOML2    |
| 0.214988873 | stable | NAGS      |
| 0.215085482 | stable | MPP2      |
| 0.215314405 | stable | MSRA      |
| 0.215314405 | stable | SDHB      |
| 0.215501086 | stable | SCML1     |

## DEG.infomation

|             |        |           |
|-------------|--------|-----------|
| 0.215568827 | stable | SLC1A1    |
| 0.215568827 | stable | SPACA5B   |
| 0.215616096 | stable | C16ORF82  |
| 0.215713088 | stable | OR5AR1    |
| 0.215727234 | stable | LOC654253 |
| 0.215727234 | stable | COL8A1    |
| 0.215734271 | stable | KIAA1660  |
| 0.215734271 | stable | LRRC37A   |
| 0.21609402  | stable | NME7      |
| 0.21609402  | stable | DCAMKL3   |
| 0.216169829 | stable | COL19A1   |
| 0.21624836  | stable | CYP7B1    |
| 0.216252847 | stable | C4ORF16   |
| 0.216298527 | stable | MYL4      |
| 0.216315813 | stable | C1ORF115  |
| 0.216329095 | stable | SLITRK3   |
| 0.216560271 | stable | HNMT      |
| 0.216634769 | stable | OR13C3    |
| 0.216678228 | stable | ZBTB6     |
| 0.216697545 | stable | C1ORF100  |
| 0.21673724  | stable | SLC2A4    |
| 0.21673724  | stable | C1ORF125  |
| 0.216801664 | stable | MPRIP     |
| 0.216880694 | stable | MMP14     |
| 0.2170335   | stable | DSCAML1   |
| 0.217222994 | stable | TNFSF12   |
| 0.217222994 | stable | LOC286239 |
| 0.217565716 | stable | NOX4      |
| 0.217668718 | stable | F2RL1     |
| 0.217694834 | stable | MGC57359  |
| 0.217694834 | stable | PSMC5     |
| 0.217889435 | stable | RPS27L    |
| 0.217958832 | stable | LOC442572 |
| 0.218142332 | stable | LOC647107 |
| 0.218142332 | stable | OR2AG1    |
| 0.218149045 | stable | PCDHGA8   |
| 0.218149045 | stable | FAM63A    |
| 0.218169422 | stable | LOC643422 |
| 0.218353352 | stable | LOC644634 |
| 0.218353352 | stable | OR7A10    |
| 0.218353352 | stable | ASTE1     |
| 0.218574263 | stable | JAKMIP2   |
| 0.218598615 | stable | LOC645435 |
| 0.218618832 | stable | ASPHD1    |
| 0.218742542 | stable | SUGT1P    |
| 0.218917026 | stable | BCAN      |
| 0.218917026 | stable | LOC652068 |
| 0.219016134 | stable | MGC3020   |
| 0.219024895 | stable | LOC647333 |
| 0.219024895 | stable | ECHDC2    |
| 0.219024895 | stable | FUSIP1    |



## DEG.infomation

|             |        |           |
|-------------|--------|-----------|
| 0.219038425 | stable | MGC40168  |
| 0.219068124 | stable | PBOV1     |
| 0.219112565 | stable | LOC644242 |
| 0.219243602 | stable | DZIP1     |
| 0.219243602 | stable | LOC440456 |
| 0.219243602 | stable | LRCH3     |
| 0.219243602 | stable | HOMER3    |
| 0.2192575   | stable | ASB4      |
| 0.219319016 | stable | LOC644886 |
| 0.219395155 | stable | MRPL50    |
| 0.219395155 | stable | ATRX      |
| 0.219407874 | stable | ZNF324    |
| 0.219458984 | stable | RUNX1     |
| 0.219499725 | stable | MYSM1     |
| 0.219659813 | stable | CCDC113   |
| 0.219659813 | stable | RAB22A    |
| 0.219659813 | stable | AGPAT6    |
| 0.219659813 | stable | PLD5      |
| 0.219659813 | stable | LOC143188 |
| 0.219852102 | stable | ATG10     |
| 0.219866805 | stable | IFNA10    |
| 0.220178086 | stable | CYP24A1   |
| 0.220251606 | stable | STS       |
| 0.220369753 | stable | GSX2      |
| 0.220369753 | stable | SLC13A2   |
| 0.22041269  | stable | PPP3CA    |
| 0.220591341 | stable | CD5L      |
| 0.220591341 | stable | ZNF280B   |
| 0.220591341 | stable | LGR8      |
| 0.220730704 | stable | SMAD2     |
| 0.220737625 | stable | ANGPT1    |
| 0.220889288 | stable | SPRR1B    |
| 0.220923423 | stable | LOC646374 |
| 0.22093559  | stable | PTK9      |
| 0.221015995 | stable | BRAP      |
| 0.221021858 | stable | ETAA1     |
| 0.221021858 | stable | MUCDHL    |
| 0.221324548 | stable | HOXD9     |
| 0.221324548 | stable | PIN1      |
| 0.221324548 | stable | SNX25     |
| 0.221324548 | stable | APOH      |
| 0.221574236 | stable | SPESP1    |
| 0.221631567 | stable | SLMO1     |
| 0.221631567 | stable | ABCC11    |
| 0.221631567 | stable | TMBIM4    |
| 0.221631567 | stable | GPR82     |
| 0.221794049 | stable | PCSK1     |
| 0.221845585 | stable | LOC285479 |
| 0.221856877 | stable | NPHS2     |
| 0.221888408 | stable | ZNF821    |
| 0.222058886 | stable | KIFC1     |

DEG.infomation

|             |        |           |
|-------------|--------|-----------|
| 0.222145824 | stable | PHACTR1   |
| 0.222355342 | stable | LRRC37A4  |
| 0.222632816 | stable | SGTA      |
| 0.222773374 | stable | GUSB      |
| 0.223138068 | stable | HBBP1     |
| 0.223138068 | stable | LOC441601 |
| 0.223139095 | stable | LOC728863 |
| 0.223139095 | stable | LOC644424 |
| 0.223276664 | stable | GJD3      |
| 0.223276664 | stable | TMPRSS6   |
| 0.223391733 | stable | XPNPEP1   |
| 0.223585962 | stable | CD3EAP    |
| 0.223850917 | stable | TMEM45A   |
| 0.223850917 | stable | LOC653497 |
| 0.223899119 | stable | MBOAT1    |
| 0.223980244 | stable | LOC442366 |
| 0.224021124 | stable | ARMC9     |
| 0.224021124 | stable | LOC440053 |
| 0.224081707 | stable | LOC653876 |
| 0.224188212 | stable | MRPL41    |
| 0.224209657 | stable | ZNF219    |
| 0.224297031 | stable | H2AFX     |
| 0.224297709 | stable | BEGAIN    |
| 0.224326622 | stable | LOC732111 |
| 0.224418473 | stable | LOC648841 |
| 0.224455541 | stable | LOC374920 |
| 0.224481495 | stable | FLJ41200  |
| 0.224723805 | stable | NOL4      |
| 0.224836382 | stable | PRSS7     |
| 0.224836382 | stable | LOC650803 |
| 0.224836382 | stable | FAM22B    |
| 0.224836382 | stable | FLJ11235  |
| 0.224910718 | stable | USP21     |
| 0.225340612 | stable | EFCAB2    |
| 0.225349055 | stable | NADK      |
| 0.225364219 | stable | C17ORF42  |
| 0.225488379 | stable | LYST      |
| 0.225564981 | stable | LOC651483 |
| 0.225564981 | stable | LOC728789 |
| 0.225564981 | stable | WDR37     |
| 0.225678802 | stable | LOC728936 |
| 0.225951544 | stable | RPL36AL   |
| 0.2260733   | stable | LOC646064 |
| 0.22609898  | stable | SULT2B1   |
| 0.226115903 | stable | NEFM      |
| 0.226284744 | stable | CHRNE     |
| 0.226392964 | stable | LOC643346 |
| 0.226392964 | stable | LOC644266 |
| 0.226464256 | stable | CD40LG    |
| 0.226475829 | stable | FLJ44005  |
| 0.226475829 | stable | PCSK5     |

## DEG.infomation

|             |        |           |
|-------------|--------|-----------|
| 0.226591201 | stable | TRIM4     |
| 0.226591201 | stable | OR7A5     |
| 0.226650418 | stable | XAB2      |
| 0.226803925 | stable | LOC653874 |
| 0.226803925 | stable | TRPM6     |
| 0.226886467 | stable | THEG      |
| 0.226964713 | stable | ZNF826    |
| 0.226977982 | stable | ADAMTSL3  |
| 0.226977982 | stable | RTL1      |
| 0.227199155 | stable | UTP6      |
| 0.227359113 | stable | RPS7      |
| 0.2274705   | stable | WDR19     |
| 0.227513941 | stable | KIAA1609  |
| 0.227572425 | stable | RACGAP1   |
| 0.227572425 | stable | C16ORF54  |
| 0.227572425 | stable | LOC642397 |
| 0.227721066 | stable | LCN9      |
| 0.227759122 | stable | DEFB121   |
| 0.227766159 | stable | CYSLTR1   |
| 0.227790764 | stable | PCDHA3    |
| 0.227798587 | stable | SLC41A2   |
| 0.227852265 | stable | OR4F21    |
| 0.227895686 | stable | GJA10     |
| 0.227899984 | stable | EEF1B2    |
| 0.227901686 | stable | GALNT13   |
| 0.227901686 | stable | PHPT1     |
| 0.228031167 | stable | LBA1      |
| 0.228031167 | stable | THBS3     |
| 0.228276013 | stable | MON1A     |
| 0.228276013 | stable | ASH1L     |
| 0.228419939 | stable | LOC729744 |
| 0.228419939 | stable | LOC648827 |
| 0.22846868  | stable | LOC642373 |
| 0.228495091 | stable | ZNF280A   |
| 0.2284976   | stable | LOC642968 |
| 0.228525996 | stable | HSFX1     |
| 0.228525996 | stable | LOC127295 |
| 0.228746991 | stable | LOC146439 |
| 0.228763464 | stable | OR4X2     |
| 0.228797781 | stable | AKAP13    |
| 0.228797781 | stable | LOC654010 |
| 0.228921877 | stable | CATSPER3  |
| 0.228966061 | stable | ATP5I     |
| 0.229000895 | stable | GLP2R     |
| 0.229115065 | stable | IMP3      |
| 0.229151178 | stable | LOC391378 |
| 0.22917938  | stable | CDC42BPA  |
| 0.229284927 | stable | ASB11     |
| 0.229340914 | stable | LOC388210 |
| 0.22944372  | stable | MUC16     |
| 0.22944372  | stable | VANGL2    |

## DEG.infomation

|             |        |           |
|-------------|--------|-----------|
| 0.229565761 | stable | LOC652553 |
| 0.229565761 | stable | SLC5A10   |
| 0.229565761 | stable | IRS4      |
| 0.2298908   | stable | KPNA5     |
| 0.229894536 | stable | LOC652674 |
| 0.230023597 | stable | CAPS      |
| 0.230097425 | stable | CRYGB     |
| 0.230158888 | stable | SPTB      |
| 0.230158888 | stable | LOC647855 |
| 0.230158888 | stable | AMOTL2    |
| 0.230294273 | stable | LOC652620 |
| 0.230394652 | stable | RPRC1     |
| 0.230466211 | stable | NCF2      |
| 0.230500862 | stable | ART1      |
| 0.230520708 | stable | PODXL     |
| 0.230520708 | stable | SMURF1    |
| 0.230520708 | stable | LOC647122 |
| 0.230556356 | stable | OR5K4     |
| 0.230649281 | stable | RBM34     |
| 0.230655693 | stable | LOC340113 |
| 0.230655693 | stable | INHA      |
| 0.230794243 | stable | CT47.1    |
| 0.230957253 | stable | MOGAT2    |
| 0.23099604  | stable | LOC642183 |
| 0.2309989   | stable | ALPI      |
| 0.231076457 | stable | CES1      |
| 0.231095545 | stable | PPT1      |
| 0.231095545 | stable | LOC643258 |
| 0.231095545 | stable | EDEM3     |
| 0.231095545 | stable | COX6B1    |
| 0.231135584 | stable | RY1       |
| 0.231135584 | stable | NSD1      |
| 0.231135584 | stable | RAB41     |
| 0.231189726 | stable | ZBTB10    |
| 0.23143971  | stable | SLC14A1   |
| 0.231473439 | stable | LOC642933 |
| 0.231483756 | stable | CCDC60    |
| 0.231483756 | stable | HOXC6     |
| 0.231744746 | stable | FGD4      |
| 0.231977048 | stable | LOC642834 |
| 0.232244545 | stable | C17ORF79  |
| 0.232306194 | stable | SNTG1     |
| 0.232306818 | stable | FRMD4B    |
| 0.232318419 | stable | MRRF      |
| 0.232318419 | stable | SKIP      |
| 0.232318419 | stable | DGKD      |
| 0.232342112 | stable | PROSC     |
| 0.232419151 | stable | TRERF1    |
| 0.23244742  | stable | LIPI      |
| 0.232555888 | stable | TTRAP     |
| 0.232561284 | stable | PRKACG    |

DEG.infomation

|             |        |           |
|-------------|--------|-----------|
| 0.232624839 | stable | LOC644297 |
| 0.232624839 | stable | LCE3D     |
| 0.232688634 | stable | C16ORF47  |
| 0.232697849 | stable | LOC646699 |
| 0.232796965 | stable | FBXO39    |
| 0.232819037 | stable | CRP       |
| 0.232883297 | stable | LOC645931 |
| 0.232988991 | stable | SMAD4     |
| 0.233362177 | stable | ALCAM     |
| 0.233561069 | stable | LOC653889 |
| 0.233685222 | stable | PPM1H     |
| 0.233742129 | stable | KRTAP3-2  |
| 0.233800537 | stable | TMCO1     |
| 0.233817157 | stable | KLHL8     |
| 0.233848206 | stable | SDC4      |
| 0.233848206 | stable | LOC399939 |
| 0.234082585 | stable | TMEM125   |
| 0.234109317 | stable | LOC390594 |
| 0.234125025 | stable | LOC642795 |
| 0.234149494 | stable | CSPG5     |
| 0.234172735 | stable | SNORA7B   |
| 0.234172735 | stable | QSOX2     |
| 0.23427401  | stable | ATPBD3    |
| 0.234319546 | stable | LPL       |
| 0.234362309 | stable | HOXC5     |
| 0.234362309 | stable | NAALADL1  |
| 0.234362309 | stable | MRC2      |
| 0.23436825  | stable | TMEM109   |
| 0.234403089 | stable | NOLA2     |
| 0.234405764 | stable | IQCF1     |
| 0.234452288 | stable | CASC3     |
| 0.234508752 | stable | TRRAP     |
| 0.234651226 | stable | HRC       |
| 0.234713924 | stable | LOC650361 |
| 0.234881768 | stable | LOC654194 |
| 0.235081322 | stable | INVS      |
| 0.235268354 | stable | CLDN14    |
| 0.235291773 | stable | CXORF27   |
| 0.235298276 | stable | EEF1A2    |
| 0.235444784 | stable | IKZF1     |
| 0.235444784 | stable | IGFL3     |
| 0.235550936 | stable | LOC645904 |
| 0.235555964 | stable | LOC653217 |
| 0.235611987 | stable | FBXO2     |
| 0.235625798 | stable | ATXN7L1   |
| 0.235789677 | stable | MUTYH     |
| 0.235789677 | stable | CD2BP2    |
| 0.235829089 | stable | EXOSC9    |
| 0.236040595 | stable | ZNF624    |
| 0.236247667 | stable | SAPS3     |
| 0.236258155 | stable | OR51L1    |

## DEG.infomation

|             |        |            |
|-------------|--------|------------|
| 0.23625825  | stable | LCE2C      |
| 0.236408534 | stable | LOC647009  |
| 0.236419411 | stable | LOC653265  |
| 0.236538214 | stable | OR1Q1      |
| 0.236538214 | stable | C1ORF185   |
| 0.236538214 | stable | MCOLN3     |
| 0.236538214 | stable | OR5D16     |
| 0.236741876 | stable | ZNF655     |
| 0.236741876 | stable | CAB39L     |
| 0.236909788 | stable | DIRAS2     |
| 0.236909788 | stable | RBM33      |
| 0.236930629 | stable | CYLC2      |
| 0.236930629 | stable | CCNA1      |
| 0.237022653 | stable | LOC643401  |
| 0.237165435 | stable | TCP1       |
| 0.237165435 | stable | CLDN18     |
| 0.237180418 | stable | PDGFRL     |
| 0.237180418 | stable | FAM71D     |
| 0.237180418 | stable | SMAD1      |
| 0.237180418 | stable | LOC283584  |
| 0.23729748  | stable | SMPD3      |
| 0.237328985 | stable | FLJ40113   |
| 0.237437962 | stable | CS         |
| 0.237449409 | stable | ZNF195     |
| 0.237449409 | stable | KLRD1      |
| 0.237561556 | stable | MAPK4      |
| 0.237849329 | stable | TBC1D9     |
| 0.237860941 | stable | BLVRA      |
| 0.237860941 | stable | MFF        |
| 0.237860941 | stable | MMD2       |
| 0.237860941 | stable | LOC652667  |
| 0.238366096 | stable | DLST       |
| 0.238388832 | stable | GML        |
| 0.238417792 | stable | DES        |
| 0.238417792 | stable | LOC649583  |
| 0.238443749 | stable | LOC441081  |
| 0.238545153 | stable | FLJ11783   |
| 0.23858022  | stable | C9ORF126   |
| 0.238623846 | stable | SNHG10     |
| 0.238701313 | stable | LOC649975  |
| 0.238701313 | stable | MGC16075   |
| 0.238712711 | stable | LOC646982  |
| 0.238842921 | stable | GPR133     |
| 0.23890847  | stable | ITM2A      |
| 0.239121923 | stable | LOC654187  |
| 0.23913807  | stable | C5ORF48    |
| 0.23913807  | stable | MED15      |
| 0.23917436  | stable | KRTAP10-11 |
| 0.23923346  | stable | TFAP2A     |
| 0.23923346  | stable | CCNT1      |
| 0.239316349 | stable | OR5AP2     |

DEG.infomation

|             |        |           |
|-------------|--------|-----------|
| 0.239344451 | stable | PFKFB1    |
| 0.239344451 | stable | C2ORF52   |
| 0.239344451 | stable | LOC646036 |
| 0.239375606 | stable | LOC439992 |
| 0.239608561 | stable | GRAMD1C   |
| 0.23964634  | stable | LOC651894 |
| 0.239684037 | stable | KCNE4     |
| 0.23979454  | stable | LOC286411 |
| 0.239896731 | stable | GPR115    |
| 0.239896731 | stable | GPR20     |
| 0.239988698 | stable | HERC2     |
| 0.239988698 | stable | SLC27A5   |
| 0.240274106 | stable | C9ORF144  |
| 0.240275598 | stable | SRP19     |
| 0.240280018 | stable | LOC401321 |
| 0.240542891 | stable | TSEN34    |
| 0.240587044 | stable | RBM15     |
| 0.240615273 | stable | C1QTNF4   |
| 0.240615273 | stable | CHRNA6    |
| 0.240620946 | stable | TCN1      |
| 0.2407092   | stable | ZNF562    |
| 0.240751849 | stable | BCL2L11   |
| 0.240770421 | stable | ANKS3     |
| 0.240776068 | stable | LOC90835  |
| 0.24079159  | stable | LOC643690 |
| 0.240985636 | stable | LOC650546 |
| 0.241237451 | stable | SARS      |
| 0.241237451 | stable | LOC729764 |
| 0.241635458 | stable | BIRC7     |
| 0.241684405 | stable | LOC441178 |
| 0.242033943 | stable | CRAMP1L   |
| 0.242177494 | stable | LIPC      |
| 0.242263162 | stable | HECTD1    |
| 0.242303648 | stable | ANKRD58   |
| 0.242612047 | stable | PTPN23    |
| 0.242705553 | stable | PLUNC     |
| 0.242762578 | stable | LOC648293 |
| 0.242906603 | stable | HTR1B     |
| 0.242979576 | stable | ZNF45     |
| 0.243077664 | stable | C14ORF177 |
| 0.243116669 | stable | TMEM55B   |
| 0.243121876 | stable | OR5T1     |
| 0.243295587 | stable | FAM53C    |
| 0.243297087 | stable | ADAMTS3   |
| 0.243297087 | stable | ACSS3     |
| 0.243407705 | stable | TAAR2     |
| 0.24349069  | stable | ART3      |
| 0.24354868  | stable | LOC388177 |
| 0.243707307 | stable | GIPR      |
| 0.244070869 | stable | LOC652543 |
| 0.244177203 | stable | STRAP     |

## DEG.infomation

|             |        |           |
|-------------|--------|-----------|
| 0.24420359  | stable | LOC650140 |
| 0.244262356 | stable | TREX2     |
| 0.244418154 | stable | MSH6      |
| 0.244449906 | stable | IQCD      |
| 0.244449906 | stable | FLJ45300  |
| 0.244480988 | stable | LOC653451 |
| 0.244480988 | stable | PCCA      |
| 0.244480988 | stable | SFN       |
| 0.244550992 | stable | C4ORF35   |
| 0.244634219 | stable | CCL3L3    |
| 0.244667059 | stable | ATP9A     |
| 0.245016592 | stable | CA2       |
| 0.245175    | stable | SDHC      |
| 0.245268622 | stable | APLN      |
| 0.245567718 | stable | TRY6      |
| 0.245707399 | stable | C1ORF109  |
| 0.245725302 | stable | LOC645609 |
| 0.245786775 | stable | LOC641849 |
| 0.245821422 | stable | DEGS2     |
| 0.24583756  | stable | MST4      |
| 0.24587818  | stable | ZNF90     |
| 0.246138651 | stable | LOC729185 |
| 0.246273669 | stable | HIST3H2BB |
| 0.246630148 | stable | FSD1L     |
| 0.24672864  | stable | EXO1      |
| 0.246947549 | stable | LOC339692 |
| 0.247029725 | stable | LOC645590 |
| 0.247029725 | stable | LOC644423 |
| 0.247029725 | stable | KDELRL1   |
| 0.247058658 | stable | MRC1L1    |
| 0.247058658 | stable | ZAP70     |
| 0.247058658 | stable | STAT2     |
| 0.247229491 | stable | LOC727761 |
| 0.247229491 | stable | SNORA65   |
| 0.247229491 | stable | CT47.6    |
| 0.247234312 | stable | CNGB1     |
| 0.247460073 | stable | DDX19B    |
| 0.247493565 | stable | LOC647038 |
| 0.24762801  | stable | LOC643922 |
| 0.247641548 | stable | DEDD2     |
| 0.24765818  | stable | DDX60     |
| 0.248092615 | stable | MCTS1     |
| 0.248446682 | stable | WDR93     |
| 0.24850539  | stable | MTF1      |
| 0.248515723 | stable | PKMYT1    |
| 0.248515723 | stable | LOC91664  |
| 0.24858054  | stable | ACVR1C    |
| 0.24858054  | stable | C16ORF7   |
| 0.248633127 | stable | FBXO25    |
| 0.248708858 | stable | KRTAP13-4 |
| 0.24881394  | stable | LOC440361 |



## DEG.infomation

|             |        |           |
|-------------|--------|-----------|
| 0.248831786 | stable | LOC642820 |
| 0.248970429 | stable | GJA3      |
| 0.248970429 | stable | LOC388161 |
| 0.248970429 | stable | NAG       |
| 0.24904463  | stable | POLR2J4   |
| 0.249128965 | stable | LOC644519 |
| 0.249197348 | stable | COPS3     |
| 0.249269268 | stable | RFXDC2    |
| 0.249293695 | stable | ZNF642    |
| 0.249363859 | stable | LOC645342 |
| 0.249497472 | stable | LOC492303 |
| 0.2495851   | stable | LOC390688 |
| 0.249617291 | stable | CSF3      |
| 0.249618245 | stable | LOC652051 |
| 0.249655472 | stable | MIZF      |
| 0.249934933 | stable | TAS2R45   |
| 0.250056459 | stable | CCDC88A   |
| 0.25008434  | stable | MBL1P1    |
| 0.25008434  | stable | AICDA     |
| 0.250085253 | stable | RREB1     |
| 0.250085253 | stable | LOC646482 |
| 0.250124505 | stable | ARTN      |
| 0.250124505 | stable | CDC45L    |
| 0.25015814  | stable | ZNF330    |
| 0.250252305 | stable | FLJ14166  |
| 0.250300589 | stable | ZNF121    |
| 0.250323551 | stable | LOC653057 |
| 0.250414979 | stable | SLC45A4   |
| 0.250414979 | stable | VPS33A    |
| 0.250440011 | stable | ASB6      |
| 0.25051508  | stable | SLC26A11  |
| 0.250579634 | stable | CYP4Z1    |
| 0.25082538  | stable | LOC652767 |
| 0.251077708 | stable | CDH24     |
| 0.25120067  | stable | USP29     |
| 0.251466289 | stable | ZNF268    |
| 0.251466289 | stable | LOC643008 |
| 0.251587232 | stable | GATA3     |
| 0.251780777 | stable | LOC652726 |
| 0.251818301 | stable | MPV17     |
| 0.251900647 | stable | MAT2A     |
| 0.251943661 | stable | TNRC4     |
| 0.251943661 | stable | KHDRBS1   |
| 0.251957629 | stable | PPM1K     |
| 0.251989657 | stable | PDGFA     |
| 0.252058345 | stable | UBE2D2    |
| 0.25207561  | stable | GPR21     |
| 0.25223036  | stable | FLJ42133  |
| 0.252468961 | stable | PRKCA     |
| 0.2525035   | stable | STX10     |
| 0.252523965 | stable | LOC440297 |

## DEG.infomation

|             |        |           |
|-------------|--------|-----------|
| 0.252527835 | stable | FCRL5     |
| 0.252535945 | stable | LOC649057 |
| 0.252664403 | stable | CLSPN     |
| 0.252718839 | stable | HIST2H2AC |
| 0.252718839 | stable | LCE3A     |
| 0.252718839 | stable | LRP12     |
| 0.252718839 | stable | LOC143543 |
| 0.252763276 | stable | ABCF3     |
| 0.252828582 | stable | REEP6     |
| 0.252828582 | stable | LOC374491 |
| 0.252845639 | stable | DDEF2     |
| 0.25287629  | stable | LOC400958 |
| 0.252992644 | stable | LOC652606 |
| 0.253089579 | stable | LOC729751 |
| 0.253148826 | stable | TMC8      |
| 0.25333662  | stable | RAB1C     |
| 0.25333662  | stable | LOC285141 |
| 0.25335333  | stable | ZNF263    |
| 0.253446126 | stable | ICMT      |
| 0.253533586 | stable | RASGRF2   |
| 0.253573449 | stable | ZMYND10   |
| 0.253607855 | stable | LOC728876 |
| 0.253611494 | stable | LOC651357 |
| 0.253611494 | stable | EDEM1     |
| 0.25425314  | stable | BTN3A1    |
| 0.254301806 | stable | IL5RA     |
| 0.254556517 | stable | SLC6A17   |
| 0.254556517 | stable | C20ORF82  |
| 0.254556517 | stable | RRM2B     |
| 0.254635421 | stable | DENND4A   |
| 0.254740397 | stable | GPR52     |
| 0.254964758 | stable | PIK3R5    |
| 0.255355103 | stable | SPSB3     |
| 0.255464867 | stable | XPO7      |
| 0.255464867 | stable | CALM3     |
| 0.255464867 | stable | YBX2      |
| 0.255501842 | stable | LOC115648 |
| 0.255533718 | stable | CLSTN2    |
| 0.255576759 | stable | SLC4A10   |
| 0.255759465 | stable | NECAP1    |
| 0.256000198 | stable | DAZL      |
| 0.256105531 | stable | LOC652197 |
| 0.256184011 | stable | DCD       |
| 0.256250818 | stable | LOC144776 |
| 0.256250818 | stable | FAM106A   |
| 0.256423907 | stable | POLR2H    |
| 0.256432446 | stable | MAMLD1    |
| 0.256432446 | stable | DCST2     |
| 0.256432446 | stable | EN1       |
| 0.256432446 | stable | LOC653262 |
| 0.256432446 | stable | CDCA8     |

## DEG.infomation

|             |        |           |
|-------------|--------|-----------|
| 0.256432446 | stable | LPHN1     |
| 0.25659277  | stable | PASD1     |
| 0.25660789  | stable | TWF2      |
| 0.256630633 | stable | SURF1     |
| 0.256631542 | stable | NLF2      |
| 0.256659376 | stable | C14ORF112 |
| 0.256701186 | stable | TBXA2R    |
| 0.256773396 | stable | BCL8      |
| 0.256955203 | stable | LOC390192 |
| 0.257136523 | stable | TAS2R49   |
| 0.257215702 | stable | ANKHD1    |
| 0.257215702 | stable | ZCCHC17   |
| 0.257303653 | stable | PSMA1     |
| 0.257303653 | stable | GOLGA5    |
| 0.257307799 | stable | LOC728518 |
| 0.257367064 | stable | CCDC82    |
| 0.257367064 | stable | ADCY2     |
| 0.257375453 | stable | COX19     |
| 0.257406416 | stable | LOC387804 |
| 0.257564151 | stable | ATG12     |
| 0.257627676 | stable | NUDT17    |
| 0.257978254 | stable | CT45-1    |
| 0.258074765 | stable | LOC653604 |
| 0.258074765 | stable | REEP4     |
| 0.258112565 | stable | DOK4      |
| 0.258134687 | stable | PIR       |
| 0.25814267  | stable | BAMBI     |
| 0.258560532 | stable | LOC652722 |
| 0.25865203  | stable | LOC654135 |
| 0.25872709  | stable | FBXL15    |
| 0.258871367 | stable | LOC389669 |
| 0.259282087 | stable | FKBPL     |
| 0.259325113 | stable | SLC30A3   |
| 0.259341862 | stable | HIST1H3J  |
| 0.259475873 | stable | TYW3      |
| 0.259531245 | stable | ADRA1A    |
| 0.259531245 | stable | LOC644556 |
| 0.259591581 | stable | GTPBP10   |
| 0.259591581 | stable | TTC31     |
| 0.259787792 | stable | LOC643980 |
| 0.259814629 | stable | LOC647065 |
| 0.25989675  | stable | ZBTB26    |
| 0.259919194 | stable | XRRA1     |
| 0.259940773 | stable | LOC643403 |
| 0.260011035 | stable | NPAL1     |
| 0.260014962 | stable | TPH2      |
| 0.26002776  | stable | PDE11A    |
| 0.260150519 | stable | LOC651059 |
| 0.260167232 | stable | LOC647339 |
| 0.260167232 | stable | LGALS12   |
| 0.260187809 | stable | C6ORF78   |

## DEG.infomation

|             |        |           |
|-------------|--------|-----------|
| 0.260307122 | stable | MLF2      |
| 0.260554673 | stable | HIST1H2AI |
| 0.260648489 | stable | LOC648526 |
| 0.260706537 | stable | GFRA1     |
| 0.260706992 | stable | LOC653059 |
| 0.260756737 | stable | FLJ25778  |
| 0.260756737 | stable | PRC1      |
| 0.260993406 | stable | PM20D2    |
| 0.260993406 | stable | RAP2C     |
| 0.261058907 | stable | MGC39900  |
| 0.261118714 | stable | SV2C      |
| 0.261137347 | stable | INSRR     |
| 0.261253704 | stable | LOC653733 |
| 0.261298769 | stable | KHDC1     |
| 0.261675072 | stable | MTHFSD    |
| 0.261676027 | stable | XAGE1E    |
| 0.261731115 | stable | BTLA      |
| 0.261869609 | stable | PC        |
| 0.261907254 | stable | LOC653420 |
| 0.262538581 | stable | ZIM3      |
| 0.26301442  | stable | LOC642778 |
| 0.263117422 | stable | USP4      |
| 0.263120248 | stable | LOC645851 |
| 0.263238419 | stable | LOC730919 |
| 0.263238419 | stable | GOT1L1    |
| 0.263429453 | stable | CDKN3     |
| 0.263437306 | stable | LOC388122 |
| 0.26351318  | stable | CASP2     |
| 0.26353655  | stable | HSPC152   |
| 0.263674266 | stable | ANKFN1    |
| 0.263682575 | stable | LOC647269 |
| 0.263732657 | stable | LOC440313 |
| 0.26388045  | stable | PPP2R5D   |
| 0.26388045  | stable | STX3      |
| 0.26388045  | stable | RDX       |
| 0.264198529 | stable | LGALS9C   |
| 0.264203603 | stable | PDLIM7    |
| 0.264203603 | stable | RCAN1     |
| 0.2642232   | stable | LOC643226 |
| 0.264246658 | stable | CAPN13    |
| 0.264325107 | stable | IL7       |
| 0.264369634 | stable | SMU1      |
| 0.264441765 | stable | ACAP1     |
| 0.264454814 | stable | TSGA10IP  |
| 0.264545349 | stable | ADIPOR1   |
| 0.264767044 | stable | CYCS      |
| 0.264825772 | stable | FLJ12949  |
| 0.264829798 | stable | BCL6B     |
| 0.264902796 | stable | LOC93463  |
| 0.264902796 | stable | BTBD9     |
| 0.264984407 | stable | TSEN54    |

## DEG.infomation

|             |        |           |
|-------------|--------|-----------|
| 0.265040225 | stable | SLC9A3    |
| 0.265210469 | stable | LOC642468 |
| 0.26521951  | stable | LOC441956 |
| 0.2652226   | stable | RAI14     |
| 0.265617725 | stable | TTTY21    |
| 0.265640277 | stable | RASGEF1B  |
| 0.265707158 | stable | LOC646508 |
| 0.265736092 | stable | LOC643962 |
| 0.265872564 | stable | LOC641989 |
| 0.266040172 | stable | C12ORF59  |
| 0.266151092 | stable | GP5       |
| 0.266183276 | stable | LOC645981 |
| 0.266184931 | stable | KLF3      |
| 0.266338793 | stable | NTF3      |
| 0.266401432 | stable | UCKL1     |
| 0.266401432 | stable | LOC730686 |
| 0.266401432 | stable | CD83      |
| 0.266474415 | stable | BTG4      |
| 0.266763846 | stable | MGC29506  |
| 0.266772834 | stable | ARRDC1    |
| 0.266772834 | stable | LOC645732 |
| 0.267094445 | stable | EVI5      |
| 0.267111924 | stable | LOC440926 |
| 0.267111924 | stable | FAM155A   |
| 0.2672413   | stable | OR51S1    |
| 0.26729658  | stable | ZNF699    |
| 0.26732169  | stable | SNORD15A  |
| 0.26732169  | stable | EHMT2     |
| 0.267428376 | stable | HMGN1     |
| 0.267428549 | stable | UTS2D     |
| 0.267480856 | stable | RSPO2     |
| 0.267606364 | stable | RPL41     |
| 0.267810218 | stable | PDZD7     |
| 0.26781321  | stable | MUC12     |
| 0.268031985 | stable | LOC400831 |
| 0.26813145  | stable | OTOR      |
| 0.268243105 | stable | DEAF1     |
| 0.268293922 | stable | SEC16B    |
| 0.268299938 | stable | KCNA10    |
| 0.268318404 | stable | LOC644919 |
| 0.268318404 | stable | USP19     |
| 0.268379667 | stable | BPTF      |
| 0.268379667 | stable | NXPH1     |
| 0.268379667 | stable | LOC647022 |
| 0.268420811 | stable | C12ORF53  |
| 0.268486402 | stable | TTC21A    |
| 0.26849371  | stable | MPO       |
| 0.268551807 | stable | LOC653419 |
| 0.268556871 | stable | LOC728351 |
| 0.26869248  | stable | MSI1      |
| 0.26869248  | stable | WDR57     |

## DEG.infomation

|             |        |           |
|-------------|--------|-----------|
| 0.268694971 | stable | GZMA      |
| 0.268715357 | stable | TRIM67    |
| 0.268891788 | stable | UIMC1     |
| 0.268891876 | stable | TMEM26    |
| 0.269017067 | stable | LOC648196 |
| 0.269356592 | stable | SETX      |
| 0.269364956 | stable | SPRY4     |
| 0.269408057 | stable | TRIM34    |
| 0.269444976 | stable | C1ORF120  |
| 0.269444976 | stable | LOC644250 |
| 0.269570327 | stable | ADAM17    |
| 0.270041184 | stable | LOC648622 |
| 0.270234623 | stable | METTTL2B  |
| 0.270267372 | stable | LOC653734 |
| 0.270291909 | stable | LNPEP     |
| 0.270480934 | stable | ABCA4     |
| 0.270480934 | stable | LOC646428 |
| 0.270718039 | stable | GJB3      |
| 0.270739931 | stable | LOC643626 |
| 0.270739931 | stable | DOM3Z     |
| 0.270820669 | stable | TESK2     |
| 0.270820669 | stable | CEACAM21  |
| 0.271492821 | stable | C7ORF45   |
| 0.271596154 | stable | LOC727759 |
| 0.271678148 | stable | GABPAP    |
| 0.272080043 | stable | MGC10701  |
| 0.272293394 | stable | HEL308    |
| 0.272293394 | stable | PPP4R1L   |
| 0.272347668 | stable | A2M       |
| 0.272579719 | stable | LOC641955 |
| 0.272590227 | stable | LHX1      |
| 0.272590227 | stable | LOC732316 |
| 0.272590227 | stable | CIZ1      |
| 0.272592543 | stable | RNF39     |
| 0.272618828 | stable | KRT6A     |
| 0.273026465 | stable | LOC645168 |
| 0.273094018 | stable | EXPH5     |
| 0.273137009 | stable | LOC653495 |
| 0.273329189 | stable | BLCAP     |
| 0.273460082 | stable | PPAP2C    |
| 0.273460082 | stable | LOC401233 |
| 0.273481866 | stable | RAB11FIP5 |
| 0.273500492 | stable | ATP5C1    |
| 0.273507962 | stable | PPP1R14D  |
| 0.273616308 | stable | ACP1      |
| 0.273616308 | stable | LOC391157 |
| 0.273629678 | stable | PLA2G4A   |
| 0.273629678 | stable | LOC645302 |
| 0.273742768 | stable | DIRAS3    |
| 0.273755518 | stable | TCF7      |
| 0.273800567 | stable | PRLHR     |

## DEG.infomation

|             |        |             |
|-------------|--------|-------------|
| 0.273905968 | stable | LOC253724   |
| 0.27395682  | stable | LOC338799   |
| 0.273960851 | stable | RPL29P2     |
| 0.274019621 | stable | SON         |
| 0.274042237 | stable | FUK         |
| 0.274061715 | stable | KRTAP12-1   |
| 0.274072554 | stable | LOC284757   |
| 0.274072554 | stable | RPL13       |
| 0.274467176 | stable | PRG2        |
| 0.274467176 | stable | ZNF486      |
| 0.274467176 | stable | LOC644120   |
| 0.27448505  | stable | LMLN        |
| 0.27448505  | stable | LOC202459   |
| 0.274540323 | stable | SLC12A1     |
| 0.27468699  | stable | BARHL1      |
| 0.274709943 | stable | LOC649365   |
| 0.274890766 | stable | ZCCHC13     |
| 0.275000411 | stable | LOC644334   |
| 0.275099145 | stable | CNGA1       |
| 0.275138695 | stable | STK25       |
| 0.275214013 | stable | CHR415SYT   |
| 0.275269774 | stable | SLC6A2      |
| 0.275276579 | stable | C7ORF42     |
| 0.27531055  | stable | NT5C        |
| 0.275327221 | stable | MYL2        |
| 0.275395028 | stable | LOC283202   |
| 0.275395028 | stable | TSPAN16     |
| 0.275483374 | stable | LOC643847   |
| 0.275491382 | stable | LOC650122   |
| 0.275625473 | stable | PEX26       |
| 0.275631556 | stable | POLD4       |
| 0.275655342 | stable | KRTAP10-1   |
| 0.275655342 | stable | FLJ34931    |
| 0.275655342 | stable | LOC646366   |
| 0.275655342 | stable | CTXN3       |
| 0.275655342 | stable | LOC283788   |
| 0.275746909 | stable | CRYGA       |
| 0.275755539 | stable | LOC648509   |
| 0.275855344 | stable | PCDHA12     |
| 0.275872641 | stable | SPACA1      |
| 0.276097114 | stable | LOC643253   |
| 0.276097114 | stable | PIWIL3      |
| 0.27613966  | stable | LOC643235   |
| 0.276263241 | stable | HOM-TES-103 |
| 0.276272427 | stable | SNAP29      |
| 0.276300767 | stable | UBE2G1      |
| 0.276300767 | stable | LOC644362   |
| 0.276313014 | stable | RCVRN       |
| 0.276321635 | stable | OR2Z1       |
| 0.276321635 | stable | AK5         |
| 0.276403146 | stable | ABCD4       |

## DEG.infomation

|             |        |               |
|-------------|--------|---------------|
| 0.276562123 | stable | CLEC17A       |
| 0.276660031 | stable | MYST3         |
| 0.276774041 | stable | RBBP5         |
| 0.276775861 | stable | PAPPA         |
| 0.276775861 | stable | FLJ40852      |
| 0.276775861 | stable | OR3A3         |
| 0.276783117 | stable | LOC643581     |
| 0.276859776 | stable | GSTO2         |
| 0.276932028 | stable | LOC440080     |
| 0.276985308 | stable | LOC652571     |
| 0.277102216 | stable | SGSH          |
| 0.277154564 | stable | WNT11         |
| 0.277246011 | stable | RPL11         |
| 0.277436949 | stable | LOC652011     |
| 0.277436949 | stable | EIF2AK1       |
| 0.277472332 | stable | FLJ46838      |
| 0.277484544 | stable | FLJ20309      |
| 0.277562528 | stable | GPR109B       |
| 0.27769883  | stable | KLHL32        |
| 0.277707869 | stable | KCNAB2        |
| 0.27773086  | stable | GFRA3         |
| 0.27773223  | stable | UNQ9433       |
| 0.277829722 | stable | LOC645705     |
| 0.278051141 | stable | LOC647286     |
| 0.278102128 | stable | LOC644973     |
| 0.278161177 | stable | CXCR6         |
| 0.278168759 | stable | GSS           |
| 0.278174183 | stable | LOC641694     |
| 0.278174183 | stable | LOC642891     |
| 0.278174183 | stable | CRIP2         |
| 0.278174183 | stable | KIAA0090      |
| 0.278545006 | stable | KRT24         |
| 0.278553985 | stable | DKFZP686C2281 |
| 0.278570268 | stable | CHST4         |
| 0.278570268 | stable | RNF185        |
| 0.278570268 | stable | TADA3L        |
| 0.27865026  | stable | OR14J1        |
| 0.27865026  | stable | ZNHIT2        |
| 0.27865026  | stable | LOC728564     |
| 0.278660514 | stable | NKG7          |
| 0.27873501  | stable | HMGB3         |
| 0.27876263  | stable | TP53TG3       |
| 0.278969918 | stable | LGALS2        |
| 0.279157965 | stable | LOC728729     |
| 0.27965542  | stable | LOC730432     |
| 0.27965542  | stable | PRR12         |
| 0.27965542  | stable | RAF1          |
| 0.279663195 | stable | SPATA19       |
| 0.279663195 | stable | SYN3          |
| 0.279799866 | stable | CXORF50       |
| 0.279823546 | stable | CLEC4F        |



## DEG.infomation

|             |        |           |
|-------------|--------|-----------|
| 0.279969423 | stable | PCDH24    |
| 0.279993781 | stable | LOC642644 |
| 0.280034029 | stable | ABCC6     |
| 0.280397448 | stable | LOC644008 |
| 0.280397448 | stable | LOC440820 |
| 0.280397448 | stable | ZIC2      |
| 0.280397448 | stable | SPATS1    |
| 0.280397448 | stable | COX7A1    |
| 0.280397448 | stable | NLRP9     |
| 0.280475639 | stable | LOC646243 |
| 0.280593408 | stable | LOC653609 |
| 0.280642959 | stable | TBKBP1    |
| 0.280646347 | stable | MED30     |
| 0.280885475 | stable | C1ORF106  |
| 0.280969157 | stable | TMEM132C  |
| 0.281009469 | stable | ZIC5      |
| 0.281064297 | stable | MRVI1     |
| 0.281419441 | stable | ZWINT     |
| 0.281439538 | stable | SBNO1     |
| 0.281502786 | stable | SSX1      |
| 0.281672032 | stable | ELK3      |
| 0.281706161 | stable | SAC3D1    |
| 0.281851467 | stable | RSRC2     |
| 0.281947595 | stable | LOC642290 |
| 0.282195682 | stable | ADAM2     |
| 0.282241883 | stable | RCHY1     |
| 0.282272313 | stable | REXO4     |
| 0.282376808 | stable | C19ORF36  |
| 0.283137117 | stable | GPR35     |
| 0.283164752 | stable | KIFC2     |
| 0.283241763 | stable | PKD1L3    |
| 0.283351762 | stable | FAM24B    |
| 0.283383789 | stable | SCGB1A1   |
| 0.283551411 | stable | HPGD      |
| 0.283551411 | stable | OSBPL6    |
| 0.283610815 | stable | MGC39372  |
| 0.283610815 | stable | GABRA4    |
| 0.283774478 | stable | RIMS4     |
| 0.283912808 | stable | LOC643558 |
| 0.284044763 | stable | EIF2C3    |
| 0.284347453 | stable | LOC647947 |
| 0.284561077 | stable | RGS14     |
| 0.284925866 | stable | C6ORF206  |
| 0.284925866 | stable | LEMD3     |
| 0.284975756 | stable | H3F3A     |
| 0.285067314 | stable | FLJ43950  |
| 0.285122049 | stable | FAM166A   |
| 0.285122049 | stable | PRR11     |
| 0.285122049 | stable | KLKB1     |
| 0.285122049 | stable | WDR63     |
| 0.285189626 | stable | LOC642716 |

## DEG.infomation

|             |        |           |
|-------------|--------|-----------|
| 0.285191232 | stable | LOC642954 |
| 0.285216306 | stable | SCRT1     |
| 0.285243734 | stable | RPL36     |
| 0.28529494  | stable | FLJ38969  |
| 0.285325716 | stable | MMP19     |
| 0.285325716 | stable | GABRA1    |
| 0.285345141 | stable | ENTPD2    |
| 0.285365108 | stable | TSSK2     |
| 0.285598984 | stable | HOXD3     |
| 0.285722445 | stable | LOC644725 |
| 0.285755018 | stable | EFNA4     |
| 0.285833532 | stable | C12ORF35  |
| 0.285997248 | stable | CHEK1     |
| 0.286222473 | stable | C20ORF152 |
| 0.286372042 | stable | ZFY       |
| 0.286372042 | stable | LOC647274 |
| 0.28658611  | stable | SAMD10    |
| 0.286753648 | stable | LOC652209 |
| 0.286808601 | stable | FAM83E    |
| 0.286905599 | stable | LOC389102 |
| 0.286905599 | stable | NDUFA12   |
| 0.286906017 | stable | C20ORF94  |
| 0.286926971 | stable | C14ORF100 |
| 0.286926971 | stable | LOC646717 |
| 0.286928358 | stable | SEC62     |
| 0.287128533 | stable | BRCC3     |
| 0.287403945 | stable | CICE      |
| 0.287470402 | stable | LMX1A     |
| 0.287580572 | stable | LOC649199 |
| 0.287639571 | stable | OR5K2     |
| 0.287657481 | stable | LOC441326 |
| 0.287678468 | stable | LOC642250 |
| 0.287842053 | stable | NLP       |
| 0.287922937 | stable | CCL3      |
| 0.287996311 | stable | LOC647466 |
| 0.288142473 | stable | LOC641716 |
| 0.288142473 | stable | NFATC4    |
| 0.288219041 | stable | SNORD14A  |
| 0.288412623 | stable | FOXP2     |
| 0.288846403 | stable | LOC643389 |
| 0.288951631 | stable | PCM1      |
| 0.289034454 | stable | TXNDC2    |
| 0.289034454 | stable | ATP5O     |
| 0.28908379  | stable | KRT75     |
| 0.28908379  | stable | LOC653463 |
| 0.289147302 | stable | GDAP1     |
| 0.289360524 | stable | CARD14    |
| 0.289429863 | stable | FAIM3     |
| 0.289521035 | stable | TNRC9     |
| 0.289578577 | stable | LOC643482 |
| 0.289589165 | stable | SLC4A9    |

## DEG.infomation

|             |        |           |
|-------------|--------|-----------|
| 0.289650228 | stable | LOC644188 |
| 0.28970569  | stable | LOC646431 |
| 0.289747654 | stable | LOC284067 |
| 0.289747654 | stable | C6ORF184  |
| 0.289747654 | stable | NDUFB6    |
| 0.289747654 | stable | UBLCP1    |
| 0.289954129 | stable | CRKRS     |
| 0.290143297 | stable | LOC729393 |
| 0.290272568 | stable | LOC653651 |
| 0.290401071 | stable | LOC650721 |
| 0.290490863 | stable | INSM1     |
| 0.290519695 | stable | MGC15705  |
| 0.290745765 | stable | MRLC2     |
| 0.290919302 | stable | OR10AG1   |
| 0.29098161  | stable | NSUN6     |
| 0.29098161  | stable | KCNN4     |
| 0.291045797 | stable | KIF26B    |
| 0.291069791 | stable | IPO8      |
| 0.29125713  | stable | LOC653781 |
| 0.291263812 | stable | LOC654109 |
| 0.291360179 | stable | CYCSL1    |
| 0.291360179 | stable | LOC196913 |
| 0.291659004 | stable | LOC388923 |
| 0.291691083 | stable | POU2F2    |
| 0.291853316 | stable | LOC145783 |
| 0.291863963 | stable | LOC652481 |
| 0.291931561 | stable | GALNT12   |
| 0.291961299 | stable | SEMA3D    |
| 0.292097254 | stable | PTPRK     |
| 0.292097254 | stable | BSND      |
| 0.292211897 | stable | HIATL1    |
| 0.292211897 | stable | LOC647566 |
| 0.292211897 | stable | LOC442590 |
| 0.292253465 | stable | LOC648377 |
| 0.292428575 | stable | UNKL      |
| 0.292428575 | stable | FBXW8     |
| 0.292520862 | stable | ZNF215    |
| 0.292745294 | stable | HAO2      |
| 0.292831171 | stable | LOC642969 |
| 0.292859942 | stable | SNX3      |
| 0.292922361 | stable | CDC42BPG  |
| 0.292922361 | stable | NTRK3     |
| 0.29347688  | stable | FAM27L    |
| 0.29371099  | stable | FLJ37078  |
| 0.293861618 | stable | KLKP1     |
| 0.293897526 | stable | KLC1      |
| 0.294023198 | stable | SH2D4A    |
| 0.294035038 | stable | C5        |
| 0.294035038 | stable | ANAPC11   |
| 0.294102568 | stable | LOC651060 |
| 0.294102568 | stable | LOC285176 |

## DEG.infomation

|             |        |           |
|-------------|--------|-----------|
| 0.294182273 | stable | HPRT1     |
| 0.294182273 | stable | OR5B21    |
| 0.294182273 | stable | PSMB1     |
| 0.294186687 | stable | SLC17A8   |
| 0.294328786 | stable | SULT1B1   |
| 0.294344616 | stable | VDR       |
| 0.29465235  | stable | ZC3H15    |
| 0.294687235 | stable | PTBP2     |
| 0.294687235 | stable | TNS3      |
| 0.294704463 | stable | LOC650132 |
| 0.294723179 | stable | GBA2      |
| 0.294918074 | stable | SKI       |
| 0.295030793 | stable | RNF148    |
| 0.295089305 | stable | MRPL48    |
| 0.295103995 | stable | STOX2     |
| 0.295180046 | stable | NLRP1     |
| 0.295226915 | stable | CLEC4C    |
| 0.295273486 | stable | LOC728990 |
| 0.295500968 | stable | STRA6     |
| 0.295514528 | stable | RNASE8    |
| 0.295531186 | stable | LOC644065 |
| 0.295531186 | stable | NCOA6IP   |
| 0.295580381 | stable | FCRL2     |
| 0.295580381 | stable | LOC643923 |
| 0.295596492 | stable | AARSD1    |
| 0.295596492 | stable | C20ORF11  |
| 0.295784402 | stable | RIC8B     |
| 0.295841617 | stable | AKAP9     |
| 0.295873399 | stable | LOC647169 |
| 0.295873399 | stable | ANO4      |
| 0.296660704 | stable | SEC31B    |
| 0.29675899  | stable | SNORD4B   |
| 0.296809062 | stable | LOC649712 |
| 0.296809062 | stable | C1ORF76   |
| 0.297161951 | stable | SPINT4    |
| 0.297171414 | stable | HCRTR2    |
| 0.29728744  | stable | RABL2A    |
| 0.297321354 | stable | FGFBP2    |
| 0.297321354 | stable | LOC642903 |
| 0.297321798 | stable | RPS16     |
| 0.297321798 | stable | PHLDA1    |
| 0.297329107 | stable | SHFM1     |
| 0.297329107 | stable | EED       |
| 0.297430431 | stable | CD3E      |
| 0.297484328 | stable | TAAR8     |
| 0.297505571 | stable | SCGB1C1   |
| 0.297505571 | stable | FAM123A   |
| 0.297505571 | stable | GNG4      |
| 0.297548015 | stable | STOX1     |
| 0.297548015 | stable | CDH2      |
| 0.297613436 | stable | LOC653092 |

## DEG.infomation

|             |        |           |
|-------------|--------|-----------|
| 0.297613436 | stable | NT5C1B    |
| 0.297613436 | stable | DUSP12    |
| 0.297661476 | stable | KIAA1875  |
| 0.297874824 | stable | OR11H4    |
| 0.297903582 | stable | UMOD      |
| 0.297992724 | stable | SNORD54   |
| 0.298159933 | stable | ZNF321    |
| 0.298466877 | stable | CD79B     |
| 0.298923565 | stable | LOC644799 |
| 0.298923565 | stable | SCIN      |
| 0.298923565 | stable | LOC133185 |
| 0.299086641 | stable | CLEC6A    |
| 0.299094916 | stable | NUP160    |
| 0.299499744 | stable | EIF2B1    |
| 0.299503923 | stable | GLI4      |
| 0.299667604 | stable | KLRK1     |
| 0.29976269  | stable | RFPL3S    |
| 0.300002093 | stable | LRRC41    |
| 0.300015229 | stable | LOC130678 |
| 0.300137468 | stable | LOC442316 |
| 0.300248471 | stable | MCHR1     |
| 0.300301032 | stable | ARX       |
| 0.300397352 | stable | LOC387856 |
| 0.300527049 | stable | SCYL2     |
| 0.300613246 | stable | USP24     |
| 0.300614331 | stable | TMEM53    |
| 0.300667774 | stable | LOC653663 |
| 0.300776121 | stable | UQCRB     |
| 0.300776121 | stable | NPAS4     |
| 0.300780778 | stable | LOC653103 |
| 0.300780778 | stable | LOC646663 |
| 0.300873743 | stable | BEST3     |
| 0.301085228 | stable | LOC652745 |
| 0.301468363 | stable | TUBGCP2   |
| 0.301685834 | stable | LOC645126 |
| 0.301725057 | stable | C15ORF48  |
| 0.301779261 | stable | APOD      |
| 0.301801005 | stable | MARCH7    |
| 0.301819064 | stable | GPR61     |
| 0.301905338 | stable | PI15      |
| 0.301925738 | stable | LOC376693 |
| 0.302065535 | stable | LOC400752 |
| 0.30209842  | stable | LOC652439 |
| 0.30212046  | stable | LOC440092 |
| 0.302242194 | stable | LOC647080 |
| 0.302275291 | stable | MRPL13    |
| 0.30228311  | stable | C20ORF38  |
| 0.302716357 | stable | LOC648133 |
| 0.302716357 | stable | LOC651829 |
| 0.302894694 | stable | POU4F2    |
| 0.302911773 | stable | OLFML2B   |

## DEG.infomation

|             |        |           |
|-------------|--------|-----------|
| 0.303030368 | stable | LOC644167 |
| 0.303053165 | stable | PKP3      |
| 0.303196131 | stable | DGAT2L6   |
| 0.303210852 | stable | TMEM45B   |
| 0.303213114 | stable | CCDC70    |
| 0.303273789 | stable | TMEM4     |
| 0.303273789 | stable | LOC646449 |
| 0.303296883 | stable | ENOSF1    |
| 0.30335891  | stable | SLC39A7   |
| 0.303375322 | stable | LOC643695 |
| 0.303481676 | stable | LOC650162 |
| 0.303481676 | stable | LOC644500 |
| 0.303495439 | stable | JMJD2B    |
| 0.303687159 | stable | ZDHHC19   |
| 0.303729849 | stable | LOC645644 |
| 0.303733555 | stable | LOC649351 |
| 0.303749171 | stable | LILRA6    |
| 0.303779352 | stable | LOC650528 |
| 0.303779352 | stable | TRIMP1    |
| 0.303928711 | stable | OSTM1     |
| 0.303931067 | stable | MYO1E     |
| 0.304116481 | stable | PTCRA     |
| 0.304466558 | stable | FAM9C     |
| 0.304510586 | stable | NAT5      |
| 0.304703249 | stable | C16ORF48  |
| 0.305375242 | stable | LOC401097 |
| 0.305509727 | stable | ANKRD30A  |
| 0.305509727 | stable | GRK1      |
| 0.305509727 | stable | PRKRA     |
| 0.305732008 | stable | BATF2     |
| 0.305883416 | stable | EPB41     |
| 0.305883416 | stable | LOC643304 |
| 0.305892994 | stable | KGFLP1    |
| 0.305971935 | stable | LOC651721 |
| 0.305988581 | stable | KIAA0226  |
| 0.306034605 | stable | ZNF650    |
| 0.306034605 | stable | NOD3      |
| 0.30604     | stable | THEM5     |
| 0.306089774 | stable | CNGA3     |
| 0.306214339 | stable | PLAGL2    |
| 0.306574339 | stable | PAQR8     |
| 0.306683097 | stable | LOC647041 |
| 0.306915055 | stable | LOC440356 |
| 0.306956689 | stable | ROBO1     |
| 0.306983098 | stable | TRIM6     |
| 0.307155315 | stable | F10       |
| 0.307197095 | stable | ZNF571    |
| 0.307553982 | stable | LOC654118 |
| 0.307612053 | stable | PTPLAD2   |
| 0.307731195 | stable | TPRX1     |
| 0.307755369 | stable | TH        |

## DEG.infomation

|             |        |              |
|-------------|--------|--------------|
| 0.307877191 | stable | LOC731158    |
| 0.307891439 | stable | EVX1         |
| 0.308001668 | stable | LOC642447    |
| 0.308011332 | stable | LOC440233    |
| 0.308138249 | stable | LOC388946    |
| 0.308378358 | stable | PEX11A       |
| 0.308423957 | stable | LOC440509    |
| 0.308423957 | stable | DPEP2        |
| 0.308496957 | stable | CHRNA4       |
| 0.308496957 | stable | LOC643854    |
| 0.308598027 | stable | OR5K3        |
| 0.308598027 | stable | CHRM5        |
| 0.308668699 | stable | LOC651905    |
| 0.308672153 | stable | LOC643154    |
| 0.30871457  | stable | USP39        |
| 0.308782631 | stable | HJURP        |
| 0.308819923 | stable | PWP1         |
| 0.308985368 | stable | FRMPD1       |
| 0.309423256 | stable | MYLK2        |
| 0.309423256 | stable | FLJ38379     |
| 0.309494551 | stable | STAG1        |
| 0.309494551 | stable | SNX6         |
| 0.309795464 | stable | IL28B        |
| 0.309795464 | stable | ETV2         |
| 0.309795464 | stable | C14ORF37     |
| 0.309873842 | stable | BHLHB8       |
| 0.309873842 | stable | PTPRF        |
| 0.309957823 | stable | NLK          |
| 0.309978938 | stable | CILP         |
| 0.310330713 | stable | LOC650148    |
| 0.310330713 | stable | BIRC2        |
| 0.310391851 | stable | CHMP4C       |
| 0.310518722 | stable | LOC641801    |
| 0.310541854 | stable | C18ORF19     |
| 0.310563181 | stable | LOC730818    |
| 0.310599705 | stable | CAMK4        |
| 0.310785892 | stable | DKFZP434N035 |
| 0.310785927 | stable | TEX11        |
| 0.310800299 | stable | CEACAM16     |
| 0.310843737 | stable | LOC643869    |
| 0.310901169 | stable | FAM173A      |
| 0.310921958 | stable | LOC643256    |
| 0.310983926 | stable | LOC644992    |
| 0.310983926 | stable | ARL17P1      |
| 0.310983926 | stable | SMPDL3B      |
| 0.31110818  | stable | TXNDC17      |
| 0.31138929  | stable | TRIM69       |
| 0.311392887 | stable | ZNF98        |
| 0.311503438 | stable | TNFAIP8L1    |
| 0.311525535 | stable | SLC35D3      |
| 0.311550425 | stable | CACNA1C      |

## DEG.infomation

|             |        |           |
|-------------|--------|-----------|
| 0.311581095 | stable | C3ORF57   |
| 0.311581095 | stable | LSM14B    |
| 0.311632112 | stable | C19ORF70  |
| 0.311642656 | stable | HNRNPA0   |
| 0.311878268 | stable | C1ORF114  |
| 0.311911028 | stable | LOC652784 |
| 0.311911028 | stable | OR6V1     |
| 0.312245344 | stable | OBP2B     |
| 0.312415954 | stable | NCF1C     |
| 0.312461969 | stable | LOC644763 |
| 0.312461969 | stable | SERPINA10 |
| 0.312461969 | stable | SOS1      |
| 0.31250678  | stable | NMUR2     |
| 0.31254461  | stable | LOC649037 |
| 0.312619057 | stable | GCSH      |
| 0.312672965 | stable | LOC650812 |
| 0.3128165   | stable | COL2A1    |
| 0.312917038 | stable | RGL4      |
| 0.312974483 | stable | LOC650708 |
| 0.313079807 | stable | PWWP2A    |
| 0.313129953 | stable | LOC642712 |
| 0.313181007 | stable | DLK1      |
| 0.313181007 | stable | LOC201164 |
| 0.313244866 | stable | PDAP1     |
| 0.313308276 | stable | CCBP2     |
| 0.313329241 | stable | PBX4      |
| 0.313518578 | stable | MGC5457   |
| 0.313620594 | stable | GLCC11    |
| 0.314097886 | stable | OR5111    |
| 0.31412047  | stable | C8ORF49   |
| 0.314232523 | stable | NAT13     |
| 0.314250368 | stable | HADHA     |
| 0.314250368 | stable | LOC645262 |
| 0.314250368 | stable | CYS1      |
| 0.314309835 | stable | XKRY      |
| 0.314471316 | stable | SNIP1     |
| 0.314475413 | stable | CFP       |
| 0.314529182 | stable | PCP4      |
| 0.314529182 | stable | LOC651192 |
| 0.31466188  | stable | OR9I1     |
| 0.314796258 | stable | C2ORF25   |
| 0.314863136 | stable | LOC646388 |
| 0.314883485 | stable | C11ORF41  |
| 0.314883485 | stable | ZFHX4     |
| 0.314883485 | stable | EIF3M     |
| 0.314967222 | stable | LOC650428 |
| 0.315055744 | stable | TXNL1     |
| 0.315121097 | stable | LOC652883 |
| 0.315213556 | stable | LOC647520 |
| 0.315253163 | stable | LOC643147 |
| 0.315310755 | stable | PCDHB3    |



## DEG.infomation

|             |        |           |
|-------------|--------|-----------|
| 0.315310755 | stable | LOC285900 |
| 0.315444538 | stable | FAM134C   |
| 0.315484395 | stable | RET       |
| 0.315541621 | stable | LOC644974 |
| 0.315747634 | stable | CEP55     |
| 0.315822766 | stable | TTPA      |
| 0.315868733 | stable | KLB       |
| 0.315868733 | stable | PCDHGC3   |
| 0.316174333 | stable | LOC650274 |
| 0.316174333 | stable | FLJ12993  |
| 0.316229633 | stable | LOC646256 |
| 0.316229633 | stable | FBLIM1    |
| 0.316231208 | stable | ECEL1     |
| 0.316242306 | stable | LOC390349 |
| 0.31628013  | stable | LOC647037 |
| 0.316333499 | stable | NBPF12    |
| 0.31636461  | stable | LOC649385 |
| 0.316428762 | stable | FAM18B    |
| 0.316433182 | stable | CST9L     |
| 0.316528963 | stable | TPX2      |
| 0.3167926   | stable | LOC650985 |
| 0.3167926   | stable | ZNF565    |
| 0.316848141 | stable | GLS       |
| 0.316863795 | stable | LOC730196 |
| 0.316977198 | stable | CNTN3     |
| 0.317016027 | stable | LOC643416 |
| 0.317094592 | stable | LOC646625 |
| 0.317239385 | stable | LOC730243 |
| 0.317239385 | stable | IKZF4     |
| 0.317239385 | stable | CHST2     |
| 0.317414293 | stable | BNIP2     |
| 0.317425273 | stable | LOC642419 |
| 0.317468097 | stable | C9ORF156  |
| 0.317766485 | stable | BAGE2     |
| 0.317940836 | stable | B4GALT2   |
| 0.31797181  | stable | CCL28     |
| 0.317986627 | stable | TARDBP    |
| 0.318357984 | stable | GTF2H3    |
| 0.318424125 | stable | PRRC1     |
| 0.318495529 | stable | OR4D2     |
| 0.318567898 | stable | NFYB      |
| 0.31866935  | stable | KIF5A     |
| 0.318713581 | stable | LOC644450 |
| 0.318713581 | stable | FLJ36157  |
| 0.318846075 | stable | LOC399898 |
| 0.318919078 | stable | FBXO15    |
| 0.319037092 | stable | SNIP      |
| 0.319141268 | stable | LOC146325 |
| 0.31928167  | stable | KRTHB6    |
| 0.31928167  | stable | SESN3     |
| 0.319407434 | stable | FAM168B   |

## DEG.infomation

|             |        |           |
|-------------|--------|-----------|
| 0.319417316 | stable | AVPR1B    |
| 0.319436064 | stable | LOC652435 |
| 0.319626005 | stable | CEP110    |
| 0.319626005 | stable | LOC441031 |
| 0.319647212 | stable | POLD1     |
| 0.319788696 | stable | SLC9A10   |
| 0.319788696 | stable | ABCB9     |
| 0.31998119  | stable | LOC653674 |
| 0.320062067 | stable | LOC727791 |
| 0.320062067 | stable | R3HDM1    |
| 0.320164583 | stable | ZNRF2     |
| 0.320164583 | stable | C9ORF131  |
| 0.320194612 | stable | LOC644204 |
| 0.320254104 | stable | KIAA2022  |
| 0.320457328 | stable | LOC650684 |
| 0.320457328 | stable | IPF1      |
| 0.320528061 | stable | LOC644808 |
| 0.320688816 | stable | LOC641941 |
| 0.320688816 | stable | SH2D6     |
| 0.320720942 | stable | RTN4RL1   |
| 0.320818391 | stable | PAM       |
| 0.320902436 | stable | LOC645454 |
| 0.320961899 | stable | KBTBD8    |
| 0.321009048 | stable | OR6K2     |
| 0.321297839 | stable | NFS1      |
| 0.321302621 | stable | GAD2      |
| 0.321591209 | stable | DNAJC22   |
| 0.32166307  | stable | SSX2IP    |
| 0.321681551 | stable | CCL15     |
| 0.321801508 | stable | NOTO      |
| 0.321801508 | stable | ABCC1     |
| 0.321809603 | stable | OR7A17    |
| 0.321894147 | stable | LOC642788 |
| 0.32190545  | stable | LOC388199 |
| 0.32190545  | stable | SQSTM1    |
| 0.321953606 | stable | CHST12    |
| 0.321953606 | stable | INS       |
| 0.321953606 | stable | HNRPA1P4  |
| 0.321978812 | stable | PCDHGB6   |
| 0.322167485 | stable | TTY20     |
| 0.322352884 | stable | LOC647819 |
| 0.322469632 | stable | KLF11     |
| 0.322520833 | stable | UGT2B4    |
| 0.322521672 | stable | DHH       |
| 0.322609517 | stable | LOC648226 |
| 0.322698867 | stable | NUDT22    |
| 0.322770155 | stable | KIAA0692  |
| 0.32278428  | stable | GNRH2     |
| 0.322813328 | stable | SPACA4    |
| 0.322896042 | stable | RAD23A    |
| 0.322944586 | stable | C6ORF138  |

## DEG.infomation

|             |        |           |
|-------------|--------|-----------|
| 0.323218437 | stable | WIF1      |
| 0.323561944 | stable | LMAN2     |
| 0.323589218 | stable | LOC390231 |
| 0.323592091 | stable | MAOA      |
| 0.323671214 | stable | PAQR7     |
| 0.32380176  | stable | LOC645971 |
| 0.323811023 | stable | GGA3      |
| 0.323905048 | stable | FGF17     |
| 0.323905048 | stable | LOC402538 |
| 0.323905048 | stable | SAP30     |
| 0.323970127 | stable | XRCC6     |
| 0.324034004 | stable | ST6GAL2   |
| 0.32404787  | stable | DNAJC1    |
| 0.324128631 | stable | LOC647785 |
| 0.324211467 | stable | MMP1      |
| 0.324236366 | stable | LGALS3    |
| 0.324316447 | stable | CYP8B1    |
| 0.324316447 | stable | ZSCAN16   |
| 0.324668929 | stable | GZF1      |
| 0.324668929 | stable | LOC442206 |
| 0.324668929 | stable | KIAA0773  |
| 0.324782284 | stable | C9ORF93   |
| 0.324792833 | stable | EIF2AK3   |
| 0.324900772 | stable | PCSK7     |
| 0.324900772 | stable | POLR3K    |
| 0.324900772 | stable | ZBTB37    |
| 0.325162526 | stable | ADAM6     |
| 0.325162526 | stable | DUSP22    |
| 0.325283399 | stable | GTF3C6    |
| 0.325305837 | stable | SEC14L3   |
| 0.32551416  | stable | AFAP1     |
| 0.325554627 | stable | ERGIC1    |
| 0.325588156 | stable | LOC402217 |
| 0.325612777 | stable | ADAMTSL2  |
| 0.32562352  | stable | BRDG1     |
| 0.325810644 | stable | ATP2B2    |
| 0.325898758 | stable | BIRC8     |
| 0.325952026 | stable | LOC647044 |
| 0.326097417 | stable | CDC2L2    |
| 0.326097417 | stable | RERE      |
| 0.326129792 | stable | COMMD2    |
| 0.326155672 | stable | AMFR      |
| 0.326155672 | stable | C20ORF173 |
| 0.326200717 | stable | SLC9A8    |
| 0.326200717 | stable | DRD1IP    |
| 0.326268085 | stable | ADM       |
| 0.326302323 | stable | TRIM64    |
| 0.326325064 | stable | LOC642187 |
| 0.326325064 | stable | LOC654165 |
| 0.326325064 | stable | ST8SIA1   |
| 0.326380088 | stable | TH1L      |

DEG.infomation

|             |        |            |
|-------------|--------|------------|
| 0.326544292 | stable | TAS2R43    |
| 0.326676952 | stable | PRNT       |
| 0.326783315 | stable | C14ORF68   |
| 0.326783315 | stable | LOC132241  |
| 0.326861798 | stable | LOC729008  |
| 0.326861798 | stable | LOC643814  |
| 0.326935553 | stable | SERINC5    |
| 0.327008006 | stable | LOC347487  |
| 0.327117697 | stable | RAB3C      |
| 0.327242073 | stable | LOC283710  |
| 0.3273574   | stable | FBXO7      |
| 0.3273574   | stable | FLJ43276   |
| 0.327409069 | stable | HIST2H2BE  |
| 0.327409069 | stable | KRTAP10-10 |
| 0.327409069 | stable | KLRA1      |
| 0.327456667 | stable | MAML2      |
| 0.327494437 | stable | INCENP     |
| 0.327513103 | stable | ACRBP      |
| 0.327590196 | stable | FLJ40712   |
| 0.327616523 | stable | IRX1       |
| 0.327616523 | stable | LOC648223  |
| 0.327631233 | stable | C16ORF50   |
| 0.327647844 | stable | FTHL2      |
| 0.327722752 | stable | CES3       |
| 0.327746559 | stable | LOC165186  |
| 0.327781702 | stable | CDH16      |
| 0.327867238 | stable | LOC388532  |
| 0.327920808 | stable | MAGEA2B    |
| 0.327964636 | stable | SOS2       |
| 0.327979426 | stable | SPACA5     |
| 0.327979426 | stable | SNORD32A   |
| 0.327979426 | stable | LOC647254  |
| 0.327979426 | stable | LOC646615  |
| 0.328034387 | stable | LOC643621  |
| 0.328095411 | stable | LOC441212  |
| 0.328095411 | stable | LOC652764  |
| 0.328142315 | stable | TMEM213    |
| 0.3281822   | stable | EFNA5      |
| 0.328274886 | stable | ACTL6A     |
| 0.328361823 | stable | SPSB1      |
| 0.328583141 | stable | MGC26718   |
| 0.328583141 | stable | TMEM195    |
| 0.328640361 | stable | LOC644313  |
| 0.328893004 | stable | PRRT2      |
| 0.328893004 | stable | LOC399978  |
| 0.328893004 | stable | LOC648829  |
| 0.328928817 | stable | OR1C1      |
| 0.329019243 | stable | C1ORF124   |
| 0.329031652 | stable | LOC649389  |
| 0.329134249 | stable | HHCM       |
| 0.329134249 | stable | LOC652526  |

## DEG.infomation

|             |        |           |
|-------------|--------|-----------|
| 0.329372272 | stable | KRT74     |
| 0.329743326 | stable | LOC390414 |
| 0.329743326 | stable | PRELID2   |
| 0.329979986 | stable | SDF2      |
| 0.330060726 | stable | LOC728636 |
| 0.330122081 | stable | FLJ41821  |
| 0.330289668 | stable | PLCH2     |
| 0.330500175 | stable | SAMD11    |
| 0.330673394 | stable | CRYBB1    |
| 0.3307387   | stable | MXRA8     |
| 0.330744776 | stable | PET112L   |
| 0.330876952 | stable | C16ORF74  |
| 0.330955282 | stable | SPTLC2    |
| 0.331072338 | stable | IBTK      |
| 0.331072338 | stable | CBWD1     |
| 0.331072338 | stable | LOC642245 |
| 0.33113694  | stable | SOX2      |
| 0.331512782 | stable | NGRN      |
| 0.331596225 | stable | PLK1      |
| 0.331722316 | stable | LOC648987 |
| 0.331921398 | stable | ZDHHC1    |
| 0.332158804 | stable | CDKL4     |
| 0.332158804 | stable | LOC644602 |
| 0.332168996 | stable | PRDM8     |
| 0.332493486 | stable | ABCB10    |
| 0.33250604  | stable | LOC643475 |
| 0.332533033 | stable | LOC652640 |
| 0.332533033 | stable | TCTEX1D4  |
| 0.332533382 | stable | KIR2DL3   |
| 0.332643844 | stable | CIRBP     |
| 0.332707384 | stable | GRM3      |
| 0.33296835  | stable | PROL1     |
| 0.333073213 | stable | OR5H15    |
| 0.333073213 | stable | ARMC6     |
| 0.333352769 | stable | LOC643060 |
| 0.3333712   | stable | TMPRSS3   |
| 0.333421336 | stable | LOC643161 |
| 0.333426763 | stable | TMCC2     |
| 0.333461047 | stable | PAQR3     |
| 0.333568419 | stable | ZNF214    |
| 0.333568419 | stable | LOC339746 |
| 0.333762222 | stable | POLRMT    |
| 0.333762222 | stable | TIMM50    |
| 0.333819949 | stable | LOC641704 |
| 0.333924479 | stable | HADHB     |
| 0.333938205 | stable | LOC442597 |
| 0.333952624 | stable | OTOP3     |
| 0.334128928 | stable | LOC645089 |
| 0.334137934 | stable | RANBP3L   |
| 0.334137934 | stable | RHCG      |
| 0.334301066 | stable | C2ORF67   |

## DEG.infomation

|             |        |           |
|-------------|--------|-----------|
| 0.334390079 | stable | AKT1      |
| 0.334583745 | stable | BICD1     |
| 0.334612686 | stable | ATP6V1E2  |
| 0.334668883 | stable | MCHR2     |
| 0.334668883 | stable | LOC646097 |
| 0.334742105 | stable | RIT2      |
| 0.334742781 | stable | LOC644005 |
| 0.334768474 | stable | IRF1      |
| 0.334888402 | stable | DIMT1L    |
| 0.335051788 | stable | ODZ2      |
| 0.335187558 | stable | CGB8      |
| 0.335234735 | stable | SORCS2    |
| 0.335269536 | stable | LOC647673 |
| 0.335324381 | stable | C1ORF137  |
| 0.335380791 | stable | DNMT3A    |
| 0.335586738 | stable | LOC646100 |
| 0.335688722 | stable | LOC653841 |
| 0.335706299 | stable | KIAA0408  |
| 0.335728396 | stable | TBCEL     |
| 0.335728396 | stable | KIAA0907  |
| 0.33582873  | stable | LOC651603 |
| 0.336115359 | stable | TIGD6     |
| 0.336239693 | stable | OR4K2     |
| 0.336324303 | stable | LOC649667 |
| 0.336402045 | stable | ANKRD16   |
| 0.336402045 | stable | HAS1      |
| 0.336614769 | stable | MEX3C     |
| 0.336614769 | stable | LOC203510 |
| 0.336633565 | stable | LOC647468 |
| 0.336813854 | stable | DOHH      |
| 0.336857666 | stable | DUSP21    |
| 0.336905778 | stable | NR6A1     |
| 0.336905778 | stable | LOC645254 |
| 0.337098976 | stable | RAB11FIP2 |
| 0.337098976 | stable | DNASE2B   |
| 0.337170344 | stable | C8ORF16   |
| 0.337194521 | stable | LOC642003 |
| 0.337194521 | stable | C5ORF24   |
| 0.337194521 | stable | LOC730109 |
| 0.337281717 | stable | ARHGAP18  |
| 0.337351635 | stable | CNP       |
| 0.337402817 | stable | LOC644669 |
| 0.337498211 | stable | WDR7      |
| 0.337500623 | stable | C10ORF2   |
| 0.337633055 | stable | SSX9      |
| 0.337844568 | stable | TMEM86B   |
| 0.337844568 | stable | IFI44L    |
| 0.337844568 | stable | LOC730347 |
| 0.337900065 | stable | DLG5      |
| 0.338020465 | stable | RHBDD3    |
| 0.338165818 | stable | RNF169    |

DEG.infomation

|             |        |           |
|-------------|--------|-----------|
| 0.338277054 | stable | KCNB2     |
| 0.338334615 | stable | SOCS5     |
| 0.338334615 | stable | FAT2      |
| 0.338334615 | stable | EPRS      |
| 0.338439616 | stable | JOSD2     |
| 0.338714925 | stable | LOC652664 |
| 0.33884571  | stable | BPIL3     |
| 0.338870622 | stable | TAL2      |
| 0.338909975 | stable | C15ORF32  |
| 0.338909975 | stable | ASNA1     |
| 0.338920843 | stable | IL1F8     |
| 0.338926535 | stable | STARD4    |
| 0.33893611  | stable | ITGBL1    |
| 0.339022066 | stable | RBM10     |
| 0.339022066 | stable | SPDEF     |
| 0.339022066 | stable | GABRB2    |
| 0.339022066 | stable | H2BFM     |
| 0.339053496 | stable | SERGEF    |
| 0.339061702 | stable | C10RF116  |
| 0.339061702 | stable | SNHG8     |
| 0.339061702 | stable | RESP18    |
| 0.339324357 | stable | CCDC96    |
| 0.339372464 | stable | LOC646155 |
| 0.339402981 | stable | NR2F2     |
| 0.339585557 | stable | C12ORF41  |
| 0.3398798   | stable | PDE12     |
| 0.340044845 | stable | SERPINB3  |
| 0.34011808  | stable | SIPA1L1   |
| 0.3401225   | stable | CCDC50    |
| 0.340357814 | stable | TTC16     |
| 0.34042974  | stable | TMEM41A   |
| 0.34042974  | stable | DHFR      |
| 0.340442555 | stable | PMFBP1    |
| 0.340442555 | stable | MEG3      |
| 0.340442555 | stable | TAS1R1    |
| 0.340459534 | stable | ZIC1      |
| 0.340534542 | stable | HTRA2     |
| 0.340624721 | stable | HAR1A     |
| 0.340624721 | stable | TMEM95    |
| 0.340624721 | stable | LOC652523 |
| 0.340732285 | stable | C17ORF97  |
| 0.340934682 | stable | NPM1      |
| 0.340980341 | stable | COMT      |
| 0.340980341 | stable | ARSI      |
| 0.340999949 | stable | CYP11B2   |
| 0.341028489 | stable | LOC389523 |
| 0.341315403 | stable | LOC648999 |
| 0.341315403 | stable | MC3R      |
| 0.34137375  | stable | PRG3      |
| 0.341490688 | stable | LOC650771 |
| 0.341490688 | stable | OR4K1     |

## DEG.infomation

|             |        |           |
|-------------|--------|-----------|
| 0.341539554 | stable | LOC643844 |
| 0.341575724 | stable | LOC645712 |
| 0.341802258 | stable | FMR1NB    |
| 0.342034662 | stable | LOC124685 |
| 0.342086627 | stable | LOC728554 |
| 0.342285949 | stable | ARRB1     |
| 0.342404671 | stable | AP4M1     |
| 0.342420378 | stable | KTI12     |
| 0.342462602 | stable | MLL4      |
| 0.342462602 | stable | YAP1      |
| 0.342505182 | stable | BRD2      |
| 0.342625764 | stable | LOC645648 |
| 0.342765591 | stable | FAM117A   |
| 0.342842406 | stable | BAP1      |
| 0.343041716 | stable | NHLH2     |
| 0.343054063 | stable | LOC652759 |
| 0.343279896 | stable | NSUN4     |
| 0.343350524 | stable | RANBP2    |
| 0.343459212 | stable | LOC646194 |
| 0.34346211  | stable | FSCB      |
| 0.343463133 | stable | ZNF43     |
| 0.343463133 | stable | HOXC8     |
| 0.343546197 | stable | ARL2      |
| 0.343546197 | stable | LOC645116 |
| 0.343546197 | stable | C9ORF7    |
| 0.343546197 | stable | TKTL1     |
| 0.343546197 | stable | OFD1      |
| 0.343666786 | stable | LOC400145 |
| 0.343666786 | stable | NUP188    |
| 0.343701097 | stable | LOC648667 |
| 0.343701097 | stable | NCAPG     |
| 0.343857709 | stable | LOC644873 |
| 0.343857709 | stable | LOC644098 |
| 0.34399556  | stable | ZSWIM1    |
| 0.344152756 | stable | UCK1      |
| 0.344152756 | stable | C2ORF65   |
| 0.344152756 | stable | MYO10     |
| 0.344274669 | stable | LOC652227 |
| 0.344274669 | stable | PIGC      |
| 0.344283406 | stable | C21ORF90  |
| 0.344334387 | stable | LOC645330 |
| 0.344518769 | stable | MAPK14    |
| 0.344589361 | stable | LOC440927 |
| 0.344589361 | stable | MGC16025  |
| 0.344893517 | stable | SPINK7    |
| 0.344898685 | stable | ZDHHC4    |
| 0.344898685 | stable | PARP12    |
| 0.344901036 | stable | LOC387940 |
| 0.345210909 | stable | LOC652696 |
| 0.345210909 | stable | WFDC2     |
| 0.345210909 | stable | NPM2      |



## DEG.infomation

|             |        |           |
|-------------|--------|-----------|
| 0.345210909 | stable | LOC284672 |
| 0.345210909 | stable | AMN1      |
| 0.345215461 | stable | KRTAP17-1 |
| 0.345245545 | stable | TCEB3C    |
| 0.345245545 | stable | GTPBP3    |
| 0.345245545 | stable | PCDHGA11  |
| 0.345254895 | stable | CAB39     |
| 0.345280877 | stable | LOC647854 |
| 0.345353989 | stable | LOC651126 |
| 0.345368076 | stable | LOC653920 |
| 0.34543754  | stable | LOC401957 |
| 0.345504484 | stable | GNB5      |
| 0.345554764 | stable | TRPM1     |
| 0.345554764 | stable | LOC644710 |
| 0.345568934 | stable | PLAC2     |
| 0.345568934 | stable | PRAMEF10  |
| 0.345568934 | stable | YDJC      |
| 0.345864765 | stable | LOC387723 |
| 0.345899539 | stable | MGC87631  |
| 0.345912266 | stable | C6ORF65   |
| 0.346054323 | stable | LOC648745 |
| 0.3463018   | stable | LOC653188 |
| 0.346440135 | stable | SPATS2    |
| 0.346440135 | stable | OVOL1     |
| 0.346512763 | stable | TREML2P   |
| 0.346556235 | stable | LOC648003 |
| 0.346625024 | stable | SMG5      |
| 0.346736046 | stable | SHROOM1   |
| 0.346736046 | stable | LOC649493 |
| 0.346969403 | stable | LOC643072 |
| 0.346969403 | stable | LOC392563 |
| 0.346969403 | stable | OR2AG2    |
| 0.346969403 | stable | PAPPA2    |
| 0.346969403 | stable | LOC643266 |
| 0.346976558 | stable | TAS2R1    |
| 0.346999344 | stable | GOLGA8F   |
| 0.347170021 | stable | WDR81     |
| 0.347357115 | stable | SPATA22   |
| 0.347357115 | stable | TMEM108   |
| 0.347375066 | stable | LHX3      |
| 0.347375066 | stable | C9ORF167  |
| 0.347451709 | stable | C10ORF99  |
| 0.347451709 | stable | FUBP1     |
| 0.347451709 | stable | RPS26L1   |
| 0.347459931 | stable | FLJ46361  |
| 0.347515197 | stable | LOC388344 |
| 0.347687455 | stable | SF3A1     |
| 0.347739883 | stable | OAS3      |
| 0.347739883 | stable | OR10W1    |
| 0.34788817  | stable | KRTAP24-1 |
| 0.34788817  | stable | POU6F1    |

## DEG.infomation

|             |        |               |
|-------------|--------|---------------|
| 0.34788817  | stable | FLJ35816      |
| 0.34788817  | stable | NTHL1         |
| 0.348330507 | stable | CDK7          |
| 0.348330507 | stable | CEP72         |
| 0.348393287 | stable | C9ORF14       |
| 0.348501531 | stable | IL1F6         |
| 0.348569291 | stable | CXORF40A      |
| 0.34857817  | stable | HTR3A         |
| 0.34869738  | stable | GSK3B         |
| 0.34869738  | stable | PLA2G4D       |
| 0.348781976 | stable | NR2F1         |
| 0.348868204 | stable | RPL26         |
| 0.349079702 | stable | PCDHA4        |
| 0.349220828 | stable | TERF2         |
| 0.349220828 | stable | LOC650203     |
| 0.349409993 | stable | PKD2L1        |
| 0.349417969 | stable | LOC647710     |
| 0.349417969 | stable | RGMB          |
| 0.349537713 | stable | OR10H1        |
| 0.349537713 | stable | OR4F16        |
| 0.349537713 | stable | TMEM81        |
| 0.349649519 | stable | OXGR1         |
| 0.349736517 | stable | FLJ45983      |
| 0.349760309 | stable | ZNF24         |
| 0.349760309 | stable | PAX5          |
| 0.349760309 | stable | GPR174        |
| 0.350084469 | stable | LOC100101121  |
| 0.350084469 | stable | FLJ43860      |
| 0.35029604  | stable | RP13-360B22.2 |
| 0.35029604  | stable | LOC441150     |
| 0.350375191 | stable | LOC644989     |
| 0.350405536 | stable | IQCF3         |
| 0.350492012 | stable | UBA52         |
| 0.350922163 | stable | AMPD3         |
| 0.350922163 | stable | C1ORF110      |
| 0.350949253 | stable | LOC642916     |
| 0.350951307 | stable | LOC402569     |
| 0.351051417 | stable | LSM10         |
| 0.351376098 | stable | LOC730953     |
| 0.351382041 | stable | LOC650061     |
| 0.351588321 | stable | LOC644841     |
| 0.351690924 | stable | KRTAP10-3     |
| 0.351706179 | stable | TBPL1         |
| 0.351730769 | stable | LOC391766     |
| 0.351892213 | stable | CPM           |
| 0.352027938 | stable | LOC730049     |
| 0.352042958 | stable | FAM135A       |
| 0.352108344 | stable | C20ORF55      |
| 0.352115186 | stable | ESCO1         |
| 0.352136773 | stable | BTBD7         |
| 0.352315661 | stable | GPR55         |

## DEG.infomation

|             |        |           |
|-------------|--------|-----------|
| 0.352475265 | stable | FLJ25037  |
| 0.352681933 | stable | LANCL3    |
| 0.352702183 | stable | MRPS7     |
| 0.352702183 | stable | KIAA1486  |
| 0.352770775 | stable | MAGEB5    |
| 0.353391872 | stable | PNRC1     |
| 0.353407231 | stable | MGC4294   |
| 0.353407231 | stable | LOC645045 |
| 0.353407231 | stable | FLJ44048  |
| 0.353407231 | stable | ST3GAL6   |
| 0.353407231 | stable | QARS      |
| 0.353624967 | stable | SGEF      |
| 0.353624967 | stable | HPS3      |
| 0.353624967 | stable | MGC102966 |
| 0.353682126 | stable | OMG       |
| 0.353789626 | stable | STYX      |
| 0.353859218 | stable | LALBA     |
| 0.354163389 | stable | POLDIP3   |
| 0.354169799 | stable | C10ORF51  |
| 0.354226943 | stable | LOC441925 |
| 0.354262528 | stable | UMPS      |
| 0.354262528 | stable | CHAF1B    |
| 0.354296491 | stable | LOC649683 |
| 0.354296491 | stable | BIK       |
| 0.354296491 | stable | AOC3      |
| 0.354482945 | stable | FAM86A    |
| 0.354489364 | stable | ANO6      |
| 0.354575523 | stable | CYP4X1    |
| 0.354606728 | stable | LOC643608 |
| 0.35468633  | stable | LOC442204 |
| 0.35501047  | stable | KIF5C     |
| 0.355239874 | stable | COMTD1    |
| 0.355398053 | stable | KIAA0895  |
| 0.355435884 | stable | SSNA1     |
| 0.355548811 | stable | LOC643169 |
| 0.355571873 | stable | SS18L2    |
| 0.355722951 | stable | LOC651752 |
| 0.355742212 | stable | LOC642355 |
| 0.355742212 | stable | TMEM50A   |
| 0.35582793  | stable | CXCL11    |
| 0.355859869 | stable | UBE2D1    |
| 0.356015016 | stable | LRRC29    |
| 0.356067769 | stable | ILDR1     |
| 0.356145569 | stable | DRGX      |
| 0.356193532 | stable | ATPBD1B   |
| 0.356199209 | stable | LOC653524 |
| 0.356199471 | stable | LOC642863 |
| 0.356199471 | stable | WDR87     |
| 0.356201506 | stable | LOC644291 |
| 0.35651808  | stable | LOC645282 |
| 0.356540268 | stable | OR4A16    |

DEG.infomation

|             |        |              |
|-------------|--------|--------------|
| 0.356645444 | stable | ZNF500       |
| 0.356818857 | stable | DCTD         |
| 0.356935926 | stable | LOC641742    |
| 0.356988566 | stable | LOC440368    |
| 0.357043503 | stable | LOC729732    |
| 0.357065509 | stable | OGDH         |
| 0.357103049 | stable | SPAG4        |
| 0.357383283 | stable | LOC641744    |
| 0.357383283 | stable | GPR137       |
| 0.357405681 | stable | FLT3LG       |
| 0.357463447 | stable | SPINK2       |
| 0.357499964 | stable | NOP5/NOP58   |
| 0.357501231 | stable | KRT32        |
| 0.357501471 | stable | BCL2L10      |
| 0.357581065 | stable | PSMAL        |
| 0.357728798 | stable | MRGPRX2      |
| 0.357783811 | stable | GULP1        |
| 0.357811015 | stable | HSD17B12     |
| 0.357854016 | stable | C1ORF66      |
| 0.357920018 | stable | LOC644656    |
| 0.357920018 | stable | ELAVL4       |
| 0.357960478 | stable | THOC3        |
| 0.357999249 | stable | ZNF619       |
| 0.357999249 | stable | LOC644986    |
| 0.358003817 | stable | PROZ         |
| 0.358045002 | stable | CENPF        |
| 0.358075312 | stable | GLYATL2      |
| 0.358254787 | stable | RP11-49G10.8 |
| 0.358499121 | stable | TNFRSF11B    |
| 0.358537076 | stable | HIST1H2BE    |
| 0.358611932 | stable | LOC650780    |
| 0.358683784 | stable | LOC644286    |
| 0.358862002 | stable | DNMBP        |
| 0.358862002 | stable | UCN3         |
| 0.359170575 | stable | TRY1         |
| 0.359191282 | stable | LOC645141    |
| 0.35927007  | stable | KIAA1549     |
| 0.359324522 | stable | LOC401237    |
| 0.359324522 | stable | LOC645958    |
| 0.359647718 | stable | C10ORF91     |
| 0.359671122 | stable | SPAG11B      |
| 0.359790913 | stable | KRTAP5-3     |
| 0.359998805 | stable | MRPS5        |
| 0.360028542 | stable | KIF19        |
| 0.3600413   | stable | SCARNA15     |
| 0.3600413   | stable | LOC646568    |
| 0.3600413   | stable | C9ORF85      |
| 0.360114795 | stable | LOC390110    |
| 0.360139491 | stable | LOC646008    |
| 0.360573937 | stable | UNC5CL       |
| 0.360578796 | stable | MID2         |

## DEG.infomation

|             |        |              |
|-------------|--------|--------------|
| 0.360729929 | stable | LOC643761    |
| 0.360754172 | stable | HAL          |
| 0.360806755 | stable | LOC392196    |
| 0.360884804 | stable | LOC645718    |
| 0.361099978 | stable | NSUN5B       |
| 0.36114594  | stable | COLEC10      |
| 0.361146333 | stable | LOC647181    |
| 0.361229949 | stable | LOC647513    |
| 0.361321737 | stable | LOC644516    |
| 0.361337475 | stable | FXYD6        |
| 0.361337475 | stable | DDX19-DDX19L |
| 0.36134007  | stable | LOC139735    |
| 0.361499058 | stable | LOC644144    |
| 0.361624626 | stable | FKBP15       |
| 0.361643088 | stable | ACTN1        |
| 0.361643088 | stable | LOC388481    |
| 0.361757158 | stable | PDK1         |
| 0.36185303  | stable | CEACAM7      |
| 0.362008752 | stable | PRED57       |
| 0.362008752 | stable | RBM1A3P      |
| 0.362055719 | stable | LOC642989    |
| 0.362084961 | stable | BPGM         |
| 0.362215088 | stable | ZNF587       |
| 0.362305255 | stable | FLJ13611     |
| 0.362415858 | stable | LOC642934    |
| 0.362611413 | stable | PREI3        |
| 0.362611413 | stable | LOC654258    |
| 0.362629468 | stable | WDR78        |
| 0.362773681 | stable | LOC641823    |
| 0.362850487 | stable | OR2A5        |
| 0.362850487 | stable | RPL7         |
| 0.362863716 | stable | LOC647347    |
| 0.363224905 | stable | FLG2         |
| 0.36327644  | stable | XKR3         |
| 0.363468768 | stable | ALPK3        |
| 0.363468768 | stable | DNAI1        |
| 0.363468768 | stable | SYT2         |
| 0.363468768 | stable | ATP6V0A4     |
| 0.363468768 | stable | DISC2        |
| 0.363835692 | stable | SNORD18C     |
| 0.363882728 | stable | DUSP7        |
| 0.363998848 | stable | LOC646813    |
| 0.364074194 | stable | NUDT8        |
| 0.364089237 | stable | GGT3P        |
| 0.364178044 | stable | MAT1A        |
| 0.364359062 | stable | MIPEP        |
| 0.364569722 | stable | LOC652831    |
| 0.364644232 | stable | SERPINA4     |
| 0.364659872 | stable | LOC646734    |
| 0.364677188 | stable | GIT1         |
| 0.364677188 | stable | MRC1         |

## DEG.infomation

|             |        |           |
|-------------|--------|-----------|
| 0.364700613 | stable | LOC644175 |
| 0.364839057 | stable | STXBP4    |
| 0.364839057 | stable | MYB       |
| 0.364993433 | stable | LOC644621 |
| 0.364993433 | stable | CHMP1A    |
| 0.365054269 | stable | TMOD2     |
| 0.365129892 | stable | LOC644948 |
| 0.365403014 | stable | CALCA     |
| 0.365509187 | stable | CARD6     |
| 0.365602128 | stable | LOC285442 |
| 0.365602128 | stable | KIR2DL5B  |
| 0.365650559 | stable | MGC50722  |
| 0.365731072 | stable | EPX       |
| 0.365854523 | stable | C11ORF72  |
| 0.36587743  | stable | ZNF296    |
| 0.36587743  | stable | PREB      |
| 0.366010726 | stable | SMC1A     |
| 0.366298042 | stable | LOC442180 |
| 0.366313906 | stable | LOC649292 |
| 0.366390426 | stable | LENG1     |
| 0.366475991 | stable | FLJ40411  |
| 0.366503062 | stable | LOC651511 |
| 0.366980261 | stable | OR2A25    |
| 0.367026291 | stable | LOC440918 |
| 0.367052167 | stable | C12ORF61  |
| 0.367174501 | stable | ZNF75     |
| 0.367273587 | stable | MICALCL   |
| 0.367341589 | stable | TAS2R41   |
| 0.367453352 | stable | SRFBP1    |
| 0.367501633 | stable | ATP9B     |
| 0.367501633 | stable | C10ORF55  |
| 0.367616782 | stable | LOC284417 |
| 0.367758415 | stable | ELA2B     |
| 0.36789705  | stable | GLYATL1   |
| 0.367940196 | stable | LOC401180 |
| 0.367956779 | stable | TFCP2L1   |
| 0.367956779 | stable | MYBPC1    |
| 0.367956779 | stable | GGTLC1    |
| 0.367956779 | stable | LOC442124 |
| 0.367956779 | stable | EPHA5     |
| 0.367956779 | stable | CCL16     |
| 0.368122978 | stable | TMEM52    |
| 0.368211245 | stable | LOC650342 |
| 0.368211245 | stable | LOC642148 |
| 0.368211245 | stable | LOC644086 |
| 0.368211245 | stable | PADI1     |
| 0.36822038  | stable | LOC642399 |
| 0.368242785 | stable | ASZ1      |
| 0.368402667 | stable | KRTAP19-3 |
| 0.368510382 | stable | LOC646570 |
| 0.368548546 | stable | LOC647225 |

## DEG.infomation

|             |        |           |
|-------------|--------|-----------|
| 0.368548546 | stable | MMP24     |
| 0.368608319 | stable | AMMECR1L  |
| 0.368703925 | stable | MAML1     |
| 0.368703925 | stable | CGB1      |
| 0.368780927 | stable | FOXJ2     |
| 0.368780927 | stable | THAP8     |
| 0.368780927 | stable | TAF7      |
| 0.368788776 | stable | TMEM166   |
| 0.36879878  | stable | PSMA6     |
| 0.368876253 | stable | NKX6-2    |
| 0.368902771 | stable | TIAF1     |
| 0.369012064 | stable | LOC652501 |
| 0.369055617 | stable | SVOPL     |
| 0.369149642 | stable | TNFRSF10C |
| 0.369149642 | stable | LOC643868 |
| 0.369149642 | stable | AGBL3     |
| 0.369173426 | stable | BTBD3     |
| 0.369202344 | stable | LOC647460 |
| 0.369203596 | stable | GMCL1L    |
| 0.369203596 | stable | C14ORF78  |
| 0.369254216 | stable | LOC643273 |
| 0.36927641  | stable | LOC643248 |
| 0.369364461 | stable | LOC442560 |
| 0.36944233  | stable | LIPJ      |
| 0.36944233  | stable | KRTAP5-4  |
| 0.369674853 | stable | LOC645078 |
| 0.370076928 | stable | PDZD8     |
| 0.370139609 | stable | CASP12    |
| 0.370218571 | stable | DEPDC7    |
| 0.370237673 | stable | LOC651197 |
| 0.370237673 | stable | KIAA1161  |
| 0.370237673 | stable | KRT36     |
| 0.370237673 | stable | GABRA3    |
| 0.370335428 | stable | LOC650804 |
| 0.370391468 | stable | NUDCD2    |
| 0.370391468 | stable | AGR3      |
| 0.370391468 | stable | PRAMEF7   |
| 0.370391468 | stable | SC4MOL    |
| 0.370391468 | stable | FLJ32255  |
| 0.370458134 | stable | SEZ6      |
| 0.37047109  | stable | LOC653570 |
| 0.370665433 | stable | KLF1      |
| 0.370755712 | stable | LOC652869 |
| 0.370845635 | stable | ZDHHC23   |
| 0.370872332 | stable | LOC646190 |
| 0.370994107 | stable | CYP2D6    |
| 0.371117653 | stable | DSTN      |
| 0.371308375 | stable | LOC643344 |
| 0.371360304 | stable | LOC652078 |
| 0.371360304 | stable | ATPBD1C   |
| 0.371439757 | stable | RAD9B     |

## DEG.infomation

|             |        |           |
|-------------|--------|-----------|
| 0.37146575  | stable | SCN1A     |
| 0.371848432 | stable | LOC642210 |
| 0.371876125 | stable | BEST4     |
| 0.372227815 | stable | LOC648645 |
| 0.372227815 | stable | NANOS2    |
| 0.372311702 | stable | LGI3      |
| 0.372313996 | stable | LOC645545 |
| 0.372355686 | stable | LOC650095 |
| 0.372360629 | stable | ESPL1     |
| 0.372675132 | stable | LOC652153 |
| 0.372677335 | stable | ZDHHC11   |
| 0.372709075 | stable | AZU1      |
| 0.372715814 | stable | TMOD1     |
| 0.372741975 | stable | CHRM4     |
| 0.372812466 | stable | GIPC3     |
| 0.372958885 | stable | LOC441876 |
| 0.373140594 | stable | ZNF711    |
| 0.373183751 | stable | PCP2      |
| 0.373212379 | stable | LOC441709 |
| 0.373227701 | stable | C6ORF128  |
| 0.373242182 | stable | LOC652882 |
| 0.373499631 | stable | LOC648148 |
| 0.373537442 | stable | LOC650770 |
| 0.373627426 | stable | LOC643738 |
| 0.373627426 | stable | HMBOX1    |
| 0.373676157 | stable | C10ORF65  |
| 0.373762165 | stable | MSMB      |
| 0.373762165 | stable | UTY       |
| 0.373762165 | stable | LOC649826 |
| 0.373762165 | stable | OR2M4     |
| 0.373830105 | stable | LOC642521 |
| 0.373981329 | stable | C6ORF148  |
| 0.374038956 | stable | IRF3      |
| 0.374047438 | stable | CACNA1S   |
| 0.374047438 | stable | NRN1L     |
| 0.374047438 | stable | LOC650517 |
| 0.374047438 | stable | OR4C15    |
| 0.374047438 | stable | LOC648205 |
| 0.374162336 | stable | SRCAP     |
| 0.374172636 | stable | IGSF10    |
| 0.374199485 | stable | OTUD5     |
| 0.37421999  | stable | LOC644536 |
| 0.374242429 | stable | LOC642620 |
| 0.374242429 | stable | LOC647488 |
| 0.37436384  | stable | FUCA1     |
| 0.37436384  | stable | CCL27     |
| 0.374728746 | stable | FLJ21767  |
| 0.374902465 | stable | COBL      |
| 0.375181144 | stable | MIOX      |
| 0.375181144 | stable | ZNF578    |
| 0.375272968 | stable | LOC652147 |



## DEG.infomation

|             |        |           |
|-------------|--------|-----------|
| 0.375327604 | stable | LOC648982 |
| 0.375327604 | stable | MFAP2     |
| 0.375327604 | stable | CLCA2     |
| 0.375343512 | stable | RBBP4     |
| 0.375441783 | stable | MGC50273  |
| 0.375494874 | stable | LOC647531 |
| 0.375497753 | stable | VWCE      |
| 0.375500064 | stable | MT1P2     |
| 0.375592794 | stable | LOC641743 |
| 0.37573485  | stable | PRDM10    |
| 0.375835722 | stable | RPL32P3   |
| 0.376001887 | stable | LOC646442 |
| 0.376100584 | stable | LOC646149 |
| 0.376253428 | stable | STK32A    |
| 0.376451083 | stable | FBXL5     |
| 0.376451083 | stable | LOC647028 |
| 0.376507437 | stable | FLJ45721  |
| 0.376507437 | stable | MYH15     |
| 0.376691638 | stable | ZNRF1     |
| 0.376933993 | stable | C2CD2L    |
| 0.37698213  | stable | C17ORF92  |
| 0.37698213  | stable | LOC732165 |
| 0.377080869 | stable | LOC644033 |
| 0.37711216  | stable | RAB5B     |
| 0.37718014  | stable | LOC644768 |
| 0.377328393 | stable | SLC8A2    |
| 0.377328393 | stable | LOC653352 |
| 0.377343757 | stable | KCNQ2     |
| 0.37735065  | stable | WDR60     |
| 0.377667596 | stable | LOC653200 |
| 0.377754504 | stable | CNNM1     |
| 0.378049779 | stable | KRTAP5-6  |
| 0.378134393 | stable | OR56A4    |
| 0.378203704 | stable | CDH7      |
| 0.378203704 | stable | C9ORF27   |
| 0.378203704 | stable | LOC653632 |
| 0.378429952 | stable | LOC645289 |
| 0.378641486 | stable | LOC644631 |
| 0.378641486 | stable | RWDD2B    |
| 0.378641486 | stable | KCNJ11    |
| 0.378693629 | stable | LOC653887 |
| 0.378693629 | stable | HDAC10    |
| 0.378693629 | stable | TFAP2D    |
| 0.378813173 | stable | TUT1      |
| 0.378816624 | stable | UHRF1BP1L |
| 0.379048073 | stable | ZNF557    |
| 0.379158309 | stable | VMO1      |
| 0.379288904 | stable | ITGB5     |
| 0.379319204 | stable | TET3      |
| 0.379364719 | stable | FER1L4    |
| 0.379391268 | stable | GCET2     |

## DEG.infomation

|             |        |           |
|-------------|--------|-----------|
| 0.379437358 | stable | LOC645553 |
| 0.379437358 | stable | LOC650584 |
| 0.379437358 | stable | LOC650463 |
| 0.379487661 | stable | ZNRD1     |
| 0.379578214 | stable | CHML      |
| 0.379635672 | stable | KIAA0565  |
| 0.379720165 | stable | LOC728601 |
| 0.379846119 | stable | LOC728910 |
| 0.379926096 | stable | ITGB1     |
| 0.379944462 | stable | CLDN22    |
| 0.380072306 | stable | LOC643570 |
| 0.380099374 | stable | NUP50     |
| 0.380105962 | stable | ZNF646    |
| 0.380105962 | stable | LOC440776 |
| 0.380105962 | stable | MGC45922  |
| 0.380105962 | stable | GUK1      |
| 0.380107095 | stable | TMEM190   |
| 0.380208101 | stable | ADRA1D    |
| 0.380217157 | stable | MAB21L1   |
| 0.380335557 | stable | JMJD2D    |
| 0.380424633 | stable | FLJ23754  |
| 0.380468121 | stable | LOC652708 |
| 0.380468121 | stable | TMIGD1    |
| 0.380468121 | stable | LOC646227 |
| 0.380632624 | stable | CD164L2   |
| 0.380944238 | stable | C12ORF36  |
| 0.381032523 | stable | COG1      |
| 0.381095098 | stable | LRRC8B    |
| 0.381174645 | stable | KIAA1604  |
| 0.381181949 | stable | SNORD16   |
| 0.381221774 | stable | ZNF789    |
| 0.381221774 | stable | LOC644647 |
| 0.381679341 | stable | MOBKL2B   |
| 0.381683121 | stable | LOC283278 |
| 0.381683121 | stable | ZBP1      |
| 0.381683121 | stable | BLNK      |
| 0.381683121 | stable | MYOHD1    |
| 0.381707408 | stable | FLJ42393  |
| 0.381707408 | stable | LOC440525 |
| 0.381731954 | stable | PATZ1     |
| 0.381921189 | stable | SUCNR1    |
| 0.381921189 | stable | MYCBP     |
| 0.382006042 | stable | CACNG7    |
| 0.382133658 | stable | LOC652713 |
| 0.382133658 | stable | LOC642471 |
| 0.382133658 | stable | OR1L6     |
| 0.382225363 | stable | LOC339240 |
| 0.382233411 | stable | LOC653905 |
| 0.382300111 | stable | CAMTA2    |
| 0.382482113 | stable | LOC401087 |
| 0.38250722  | stable | KRTAP5-5  |

## DEG.infomation

|             |        |              |
|-------------|--------|--------------|
| 0.38250722  | stable | FLJ31813     |
| 0.38250722  | stable | LOC650433    |
| 0.38250722  | stable | LOC200493    |
| 0.382614002 | stable | DOCK4        |
| 0.382614002 | stable | AGXT2        |
| 0.382614002 | stable | GTF2IRD2     |
| 0.382614002 | stable | SC65         |
| 0.382614002 | stable | NAT12        |
| 0.382624793 | stable | C2ORF39      |
| 0.382751637 | stable | MFSD9        |
| 0.382789958 | stable | PSG5         |
| 0.382840816 | stable | RAB4A        |
| 0.383022964 | stable | LOC642181    |
| 0.383022964 | stable | LOC155060    |
| 0.383022964 | stable | LOC649021    |
| 0.383037245 | stable | ANKRD41      |
| 0.38330586  | stable | LOC653155    |
| 0.383395963 | stable | PADI2        |
| 0.383400053 | stable | SFRS14       |
| 0.383400053 | stable | CDH6         |
| 0.383400053 | stable | PLXNA2       |
| 0.383598048 | stable | KLHL18       |
| 0.383842171 | stable | PDE4A        |
| 0.383842171 | stable | C20ORF96     |
| 0.383842171 | stable | LOC196752    |
| 0.383903453 | stable | LOC642343    |
| 0.383903453 | stable | LOC647331    |
| 0.384299109 | stable | LOC375748    |
| 0.384299109 | stable | LOC441136    |
| 0.3843933   | stable | LRRC23       |
| 0.3843933   | stable | DKFZP434K191 |
| 0.384682435 | stable | LOC644193    |
| 0.384993363 | stable | FLJ10803     |
| 0.385013761 | stable | RBM17        |
| 0.385029666 | stable | LOC646426    |
| 0.385072988 | stable | F7           |
| 0.385072988 | stable | FLJ43987     |
| 0.385072988 | stable | CCDC12       |
| 0.385156637 | stable | AGBL4        |
| 0.38518576  | stable | TMEM163      |
| 0.38518576  | stable | RSPH10B      |
| 0.38548481  | stable | LOC389676    |
| 0.38548481  | stable | LOC646345    |
| 0.38548481  | stable | LOC653563    |
| 0.385514037 | stable | CT45-4       |
| 0.385517105 | stable | PLEKHG5      |
| 0.385805749 | stable | LOC647079    |
| 0.385805749 | stable | LOC730249    |
| 0.385805749 | stable | LOC158730    |
| 0.38652741  | stable | LOC341604    |
| 0.38660459  | stable | LOC651562    |

DEG.infomation

|             |        |           |
|-------------|--------|-----------|
| 0.38660459  | stable | IQCE      |
| 0.38660459  | stable | OR13G1    |
| 0.386607282 | stable | LOC653355 |
| 0.386611824 | stable | DDHD2     |
| 0.38667008  | stable | LIPL4     |
| 0.386677153 | stable | EMX2      |
| 0.386677153 | stable | RPL15     |
| 0.386710235 | stable | LOC654335 |
| 0.386727662 | stable | LOC644116 |
| 0.386773775 | stable | ROS1      |
| 0.386773775 | stable | LOC340156 |
| 0.386878918 | stable | LOC646589 |
| 0.386915241 | stable | KIR3DL1   |
| 0.386940303 | stable | GRIK1     |
| 0.387168968 | stable | CD5       |
| 0.387210343 | stable | RNF112    |
| 0.387210343 | stable | HERV-FRD  |
| 0.387210343 | stable | STARD10   |
| 0.387227322 | stable | NCKAP1    |
| 0.387253938 | stable | LOC649200 |
| 0.38728237  | stable | TSPYL4    |
| 0.387318174 | stable | LOC641721 |
| 0.387350999 | stable | LOC646970 |
| 0.387553418 | stable | LOC647606 |
| 0.387553418 | stable | FLRT1     |
| 0.387553418 | stable | LOC644001 |
| 0.387681558 | stable | LOC646835 |
| 0.387825977 | stable | LOC651344 |
| 0.387888863 | stable | KCNJ5     |
| 0.387979448 | stable | LOC653392 |
| 0.388173282 | stable | FAM151B   |
| 0.388270899 | stable | ALPK2     |
| 0.388353165 | stable | DRG2      |
| 0.38851653  | stable | NR5A2     |
| 0.388582181 | stable | LOC647406 |
| 0.388625844 | stable | MGAT5B    |
| 0.388699232 | stable | LOC260339 |
| 0.388741487 | stable | LOC653225 |
| 0.388785751 | stable | SLC5A1    |
| 0.388785751 | stable | ART5      |
| 0.388807983 | stable | LY6G5C    |
| 0.389378486 | stable | ZXDB      |
| 0.389393111 | stable | DEFB137   |
| 0.389694867 | stable | RTP2      |
| 0.389888616 | stable | CABLES1   |
| 0.389888616 | stable | LRRK1     |
| 0.390006385 | stable | ASAH3     |
| 0.390006385 | stable | PPP3R1    |
| 0.390006385 | stable | CLK3      |
| 0.390056642 | stable | LRRTM1    |
| 0.390124508 | stable | LOC645967 |

## DEG.infomation

|             |        |           |
|-------------|--------|-----------|
| 0.390243622 | stable | LOC649431 |
| 0.390322101 | stable | SOCS6     |
| 0.390590953 | stable | LOC641726 |
| 0.390647718 | stable | LCE3B     |
| 0.390653003 | stable | MYCBP2    |
| 0.390819331 | stable | HIST1H2BD |
| 0.390857054 | stable | MTMR1     |
| 0.390898623 | stable | LILRA4    |
| 0.390912974 | stable | LOC647060 |
| 0.391054928 | stable | OR4K5     |
| 0.39124957  | stable | GOT1      |
| 0.39137399  | stable | LOC654117 |
| 0.391499771 | stable | LOC643491 |
| 0.391733035 | stable | LOC648145 |
| 0.391733035 | stable | KLRC3     |
| 0.391733035 | stable | TSHB      |
| 0.391733035 | stable | BAGE4     |
| 0.391733035 | stable | LRRC37A3  |
| 0.391733035 | stable | LOC645783 |
| 0.391762451 | stable | TMEM119   |
| 0.391762451 | stable | LOC646939 |
| 0.391946753 | stable | LIPF      |
| 0.391972124 | stable | LYRM4     |
| 0.391991315 | stable | CWF19L1   |
| 0.392054586 | stable | OR10H2    |
| 0.392063271 | stable | MTFR1     |
| 0.392063865 | stable | MIA       |
| 0.392063865 | stable | ARMC8     |
| 0.392096577 | stable | LOC440348 |
| 0.392096577 | stable | LOC644083 |
| 0.392153128 | stable | MORN3     |
| 0.392153128 | stable | CHSY3     |
| 0.392367629 | stable | ARL6IP4   |
| 0.392367629 | stable | LOC390033 |
| 0.392367629 | stable | HES3      |
| 0.392414576 | stable | GNPDA2    |
| 0.392531738 | stable | DNAJA1    |
| 0.392629406 | stable | SYT16     |
| 0.392771988 | stable | FLJ23172  |
| 0.392854561 | stable | ESX1      |
| 0.392952579 | stable | LOC283585 |
| 0.393366836 | stable | LOC728395 |
| 0.393418284 | stable | WDR26     |
| 0.39344438  | stable | AMIGO1    |
| 0.393654608 | stable | MRFAP1    |
| 0.393743295 | stable | C16ORF70  |
| 0.393839619 | stable | AGTRAP    |
| 0.393839619 | stable | LOC390714 |
| 0.393917985 | stable | CLEC14A   |
| 0.393940811 | stable | LOC649821 |
| 0.393940811 | stable | CTBP1     |

## DEG.infomation

|             |        |              |
|-------------|--------|--------------|
| 0.394091405 | stable | C19ORF44     |
| 0.394186924 | stable | IL17F        |
| 0.394253886 | stable | LOC440993    |
| 0.394540596 | stable | LOC652271    |
| 0.39467073  | stable | CA9          |
| 0.39467073  | stable | NMU          |
| 0.394978994 | stable | RP1          |
| 0.395103775 | stable | FGF3         |
| 0.395103775 | stable | LCORL        |
| 0.395103775 | stable | PRR7         |
| 0.395103775 | stable | LMAN1        |
| 0.395103775 | stable | EPHX1        |
| 0.395269659 | stable | MGAT5        |
| 0.395270819 | stable | PAGE1        |
| 0.395288595 | stable | LAMP3        |
| 0.395408458 | stable | FAM126A      |
| 0.395432103 | stable | NAT15        |
| 0.395476485 | stable | TSNAXIP1     |
| 0.395700244 | stable | DKFZP434B061 |
| 0.395700338 | stable | LOC644672    |
| 0.395800737 | stable | PSITPTE22    |
| 0.395807761 | stable | CLIP2        |
| 0.395840599 | stable | KRT23        |
| 0.395850398 | stable | LOC650689    |
| 0.395946691 | stable | AP3S1        |
| 0.396129891 | stable | LENEP        |
| 0.396730773 | stable | MGC52282     |
| 0.396856885 | stable | ZNF579       |
| 0.396856885 | stable | ADAMTS16     |
| 0.396859802 | stable | C20ORF165    |
| 0.396859802 | stable | LOC643904    |
| 0.396868124 | stable | TDGF1        |
| 0.396924919 | stable | SFMBT2       |
| 0.396924919 | stable | PIWIL1       |
| 0.396924919 | stable | LOC644097    |
| 0.396924919 | stable | C13ORF3      |
| 0.396924919 | stable | EFCAB5       |
| 0.396924919 | stable | LDB2         |
| 0.396924919 | stable | TFAP4        |
| 0.396938575 | stable | LOC730417    |
| 0.396986133 | stable | C20ORF185    |
| 0.397014401 | stable | CLN5         |
| 0.397014401 | stable | SCUBE3       |
| 0.397095384 | stable | FER1L3       |
| 0.397274881 | stable | SKIL         |
| 0.397348265 | stable | LOC643895    |
| 0.397348265 | stable | ZNF585B      |
| 0.397348265 | stable | DUSP6        |
| 0.397348265 | stable | CRYBA1       |
| 0.397400983 | stable | SNCG         |
| 0.397636275 | stable | TGM3         |

DEG.infomation

|             |        |           |
|-------------|--------|-----------|
| 0.397662674 | stable | RNF31     |
| 0.397662674 | stable | LOC651141 |
| 0.397662674 | stable | SPOCK3    |
| 0.397662674 | stable | NAPA      |
| 0.397662674 | stable | RAD54L    |
| 0.397739673 | stable | ALK       |
| 0.397888741 | stable | LOC650167 |
| 0.39793032  | stable | FBXL7     |
| 0.398009144 | stable | LOC645212 |
| 0.398022404 | stable | SLC5A2    |
| 0.398022404 | stable | LOC391358 |
| 0.398469179 | stable | GPATCH3   |
| 0.398469179 | stable | IQCH      |
| 0.39868497  | stable | LOC139587 |
| 0.398761613 | stable | LOC653199 |
| 0.398791951 | stable | KRT26     |
| 0.398822723 | stable | EDG1      |
| 0.398822723 | stable | WNK4      |
| 0.398957379 | stable | MANSC1    |
| 0.399011684 | stable | MORC4     |
| 0.399033195 | stable | ZNF527    |
| 0.399113264 | stable | PREX2     |
| 0.399196504 | stable | ROR2      |
| 0.399368746 | stable | LOC440742 |
| 0.399398939 | stable | METTL6    |
| 0.399398939 | stable | FSBP      |
| 0.399520063 | stable | NAPG      |
| 0.399520063 | stable | TSPYL6    |
| 0.399520063 | stable | C14ORF115 |
| 0.399563898 | stable | SEC61G    |
| 0.399563898 | stable | INO80E    |
| 0.399563898 | stable | LOC652789 |
| 0.399575967 | stable | LOC645520 |
| 0.399575967 | stable | ARFGAP1   |
| 0.399758168 | stable | LOC644347 |
| 0.39987878  | stable | LOC652490 |
| 0.39987878  | stable | LOC649859 |
| 0.40005639  | stable | DDN       |
| 0.400010079 | stable | LOC651914 |
| 0.400010079 | stable | LOC730877 |
| 0.400034152 | stable | MAGEB16   |
| 0.400114278 | stable | C1ORF147  |
| 0.400198645 | stable | LOC651115 |
| 0.400280017 | stable | C2ORF15   |
| 0.400363527 | stable | HIST1H2BN |
| 0.400363527 | stable | CDC42EP5  |
| 0.400648301 | stable | LOC440354 |
| 0.400648301 | stable | LOC645073 |
| 0.400730378 | stable | NEFH      |
| 0.40082318  | stable | PTPRB     |
| 0.400836294 | stable | RPL22L1   |

DEG.infomation

|             |        |           |
|-------------|--------|-----------|
| 0.40085199  | stable | ZNF746    |
| 0.400990617 | stable | PYY       |
| 0.400990617 | stable | LIFR      |
| 0.400990617 | stable | LOC643718 |
| 0.401354419 | stable | WASF3     |
| 0.401458977 | stable | DSCAM     |
| 0.401476555 | stable | STYXL1    |
| 0.401496626 | stable | GCG       |
| 0.401496626 | stable | SPARC     |
| 0.401643489 | stable | LOC649680 |
| 0.401643489 | stable | C8ORF78   |
| 0.401757888 | stable | IL23A     |
| 0.401761554 | stable | NASP      |
| 0.401761554 | stable | RAXL1     |
| 0.401761554 | stable | LOC730411 |
| 0.401761554 | stable | CYB5R3    |
| 0.401871117 | stable | HCN4      |
| 0.401922879 | stable | CT45-6    |
| 0.401922879 | stable | G3BP1     |
| 0.401922879 | stable | S100G     |
| 0.401922879 | stable | NUDT11    |
| 0.401943029 | stable | ZNF804A   |
| 0.401982268 | stable | LOC652400 |
| 0.402033576 | stable | WDR54     |
| 0.402039546 | stable | HIST1H3F  |
| 0.402050355 | stable | STAG3L1   |
| 0.402119177 | stable | OR1L1     |
| 0.40223036  | stable | PTP4A3    |
| 0.402283267 | stable | CNIH2     |
| 0.402321639 | stable | LOC402279 |
| 0.402321639 | stable | LOC654256 |
| 0.402438411 | stable | SSB       |
| 0.402438411 | stable | THPO      |
| 0.402645962 | stable | SLC1A2    |
| 0.402761063 | stable | AMTN      |
| 0.403153013 | stable | TNFRSF18  |
| 0.403156926 | stable | PRTG      |
| 0.403174483 | stable | TNFRSF8   |
| 0.403174483 | stable | LOC728505 |
| 0.403174483 | stable | AMH       |
| 0.40327277  | stable | LOC652645 |
| 0.4034722   | stable | WDR40B    |
| 0.4034722   | stable | LOC646774 |
| 0.403563282 | stable | MT4       |
| 0.403598669 | stable | PLK3      |
| 0.40362288  | stable | CD24      |
| 0.403689077 | stable | HIST4H4   |
| 0.403712925 | stable | C4ORF6    |
| 0.40397819  | stable | CLEC4A    |
| 0.404047096 | stable | ZNF581    |
| 0.404099976 | stable | ANKRD13D  |



## DEG.infomation

|             |        |               |
|-------------|--------|---------------|
| 0.404280967 | stable | LOC650494     |
| 0.404336226 | stable | LOC441127     |
| 0.404389991 | stable | LOC652680     |
| 0.404389991 | stable | BCHE          |
| 0.404389991 | stable | NAT8          |
| 0.404389991 | stable | CHDH          |
| 0.404389991 | stable | OR52H1        |
| 0.404420784 | stable | LOC644916     |
| 0.404461259 | stable | CCNE1         |
| 0.404464147 | stable | LOC643318     |
| 0.404608569 | stable | C2ORF37       |
| 0.404608569 | stable | LOC727948     |
| 0.40463342  | stable | ZBTB11        |
| 0.404638945 | stable | LOC442406     |
| 0.404698635 | stable | TRPC3         |
| 0.404699642 | stable | PTPDC1        |
| 0.404699642 | stable | MOCS3         |
| 0.404699642 | stable | TAF9          |
| 0.404782838 | stable | STX1A         |
| 0.404985905 | stable | HYAL1         |
| 0.405051003 | stable | CMTM4         |
| 0.405068483 | stable | LOC653579     |
| 0.405080052 | stable | GDI2          |
| 0.405080052 | stable | ANP32E        |
| 0.405080052 | stable | C15ORF60      |
| 0.405128257 | stable | GPR63         |
| 0.405265415 | stable | LGI4          |
| 0.405265415 | stable | C21ORF66      |
| 0.405316551 | stable | DKFZP434B0335 |
| 0.40532027  | stable | ZNF331        |
| 0.40532027  | stable | FAM71F2       |
| 0.405427984 | stable | SLC12A5       |
| 0.405469892 | stable | LOC732372     |
| 0.405535965 | stable | RTDR1         |
| 0.405760808 | stable | NPY           |
| 0.405760808 | stable | LOC644196     |
| 0.40576211  | stable | LOC641765     |
| 0.405916288 | stable | FAM118B       |
| 0.406033964 | stable | ZFP41         |
| 0.406055543 | stable | LOC650329     |
| 0.406150121 | stable | TRPC2         |
| 0.406150121 | stable | FLJ45832      |
| 0.406151133 | stable | ULBP3         |
| 0.406243865 | stable | AOC2          |
| 0.406364166 | stable | LOC441119     |
| 0.406370597 | stable | PSG7          |
| 0.406527954 | stable | C12ORF24      |
| 0.406527954 | stable | HCG3          |
| 0.406613008 | stable | LOC388813     |
| 0.406679802 | stable | C10ORF93      |
| 0.406703383 | stable | LOC642167     |

## DEG.infomation

|             |        |           |
|-------------|--------|-----------|
| 0.406754923 | stable | TP73      |
| 0.40681894  | stable | LOC647049 |
| 0.406977347 | stable | SPNS3     |
| 0.407031438 | stable | GGN       |
| 0.407031438 | stable | LOC254398 |
| 0.407031438 | stable | FOXP4     |
| 0.407031438 | stable | LOC647843 |
| 0.407072465 | stable | LOC645227 |
| 0.407343584 | stable | LOC644931 |
| 0.40736708  | stable | NEK5      |
| 0.40736708  | stable | ADH7      |
| 0.407399765 | stable | ATP5J2    |
| 0.407417936 | stable | IDH3A     |
| 0.407506258 | stable | NRD1      |
| 0.407506258 | stable | FOXO4     |
| 0.407630356 | stable | LOC650562 |
| 0.407703925 | stable | MAP3K11   |
| 0.407827405 | stable | SFRP2     |
| 0.407933117 | stable | FEV       |
| 0.408075249 | stable | CRTC1     |
| 0.408368682 | stable | LOC730256 |
| 0.408562148 | stable | LOC652612 |
| 0.408684378 | stable | DUX5      |
| 0.408684378 | stable | PPT2      |
| 0.408723829 | stable | LOC648127 |
| 0.408723829 | stable | LOC647519 |
| 0.40885069  | stable | LOC650498 |
| 0.408882455 | stable | CARS      |
| 0.409533057 | stable | LOC283999 |
| 0.409551262 | stable | FAM161B   |
| 0.409733098 | stable | RANBP9    |
| 0.410169529 | stable | SGCB      |
| 0.410183453 | stable | LOC646132 |
| 0.410183453 | stable | PRDM4     |
| 0.410352438 | stable | DPM3      |
| 0.410352438 | stable | ANKRD13B  |
| 0.410401244 | stable | LOC646772 |
| 0.410491485 | stable | LOC728481 |
| 0.410529695 | stable | TMEM156   |
| 0.410907811 | stable | GPR157    |
| 0.41105205  | stable | LOC645551 |
| 0.411414589 | stable | KIAA0586  |
| 0.411857704 | stable | LOC643696 |
| 0.411911679 | stable | TBPL2     |
| 0.411911679 | stable | CEACAM20  |
| 0.411911679 | stable | LOC649817 |
| 0.411911679 | stable | GNL3L     |
| 0.411911679 | stable | LOC642185 |
| 0.411947089 | stable | C10ORF37  |
| 0.41195924  | stable | SLC12A2   |
| 0.412016028 | stable | SLC4A3    |

DEG.infomation

|             |        |           |
|-------------|--------|-----------|
| 0.412016028 | stable | LOC650961 |
| 0.412115646 | stable | SLC24A5   |
| 0.41238732  | stable | SRP68     |
| 0.412544853 | stable | LRRTM3    |
| 0.412590371 | stable | KIFC3     |
| 0.412849241 | stable | NCOA6     |
| 0.412886895 | stable | CENPL     |
| 0.412886895 | stable | PAX6      |
| 0.412886895 | stable | TXNL4B    |
| 0.412893523 | stable | ZNF143    |
| 0.412913123 | stable | IL17REL   |
| 0.413174051 | stable | GLRX5     |
| 0.413476911 | stable | LOC645186 |
| 0.41350504  | stable | LOC644172 |
| 0.413552933 | stable | SCYE1     |
| 0.413649127 | stable | NR5A1     |
| 0.413729867 | stable | PSKH1     |
| 0.413729867 | stable | TM9SF4    |
| 0.413889857 | stable | SOAT1     |
| 0.413981674 | stable | C6ORF27   |
| 0.413993224 | stable | RAB20     |
| 0.413993224 | stable | CDC37L1   |
| 0.414257122 | stable | C10ORF49  |
| 0.414257122 | stable | LOC643225 |
| 0.414401932 | stable | LDB1      |
| 0.414475574 | stable | TMEM164   |
| 0.414475574 | stable | MYT1L     |
| 0.414492877 | stable | KRT1      |
| 0.414627991 | stable | ACOT11    |
| 0.414670935 | stable | LOC402066 |
| 0.414723694 | stable | LOC340228 |
| 0.41483338  | stable | LOC389365 |
| 0.41483338  | stable | ACN9      |
| 0.41483338  | stable | C20ORF160 |
| 0.414986715 | stable | OR5AN1    |
| 0.415194309 | stable | LOC283487 |
| 0.415284337 | stable | IFNA8     |
| 0.415329053 | stable | LCE1B     |
| 0.415329053 | stable | ZNF345    |
| 0.415351582 | stable | LRAT      |
| 0.415351582 | stable | SLC5A12   |
| 0.415351582 | stable | SULT1A4   |
| 0.415351582 | stable | OR2T29    |
| 0.415428516 | stable | LOC399746 |
| 0.4155109   | stable | PSMD9     |
| 0.415542182 | stable | RBM15B    |
| 0.415600705 | stable | EPS8L1    |
| 0.415600705 | stable | SEMA3G    |
| 0.415600705 | stable | XKR7      |
| 0.415600705 | stable | DBNDD1    |
| 0.415620633 | stable | LSM5      |

## DEG.infomation

|             |        |           |
|-------------|--------|-----------|
| 0.415688467 | stable | TBR1      |
| 0.415823171 | stable | ACSF3     |
| 0.415823171 | stable | LOC390876 |
| 0.416038941 | stable | RNF17     |
| 0.416114728 | stable | C1D       |
| 0.416117366 | stable | DAZ2      |
| 0.416140593 | stable | IMPAD1    |
| 0.416211054 | stable | LOC644168 |
| 0.416289048 | stable | TLX1      |
| 0.41647081  | stable | LOC645839 |
| 0.41653447  | stable | ARVP6125  |
| 0.416694051 | stable | LOC643125 |
| 0.416732221 | stable | LOC644769 |
| 0.416732221 | stable | LOC400197 |
| 0.416843708 | stable | ZFAND3    |
| 0.416894486 | stable | LOC644427 |
| 0.417018215 | stable | SLC2A10   |
| 0.417098444 | stable | CCDC138   |
| 0.417098444 | stable | HCP5      |
| 0.417098444 | stable | MEI1      |
| 0.417167989 | stable | RASGEF1A  |
| 0.417324142 | stable | DACH2     |
| 0.417333785 | stable | CDRT15    |
| 0.417708806 | stable | LOC641719 |
| 0.417986764 | stable | C14ORF125 |
| 0.417986764 | stable | IFNK      |
| 0.418017124 | stable | L3MBTL3   |
| 0.418381297 | stable | LOC646359 |
| 0.418381297 | stable | GPC6      |
| 0.418654145 | stable | TNFSF14   |
| 0.4186682   | stable | TMCC3     |
| 0.418965049 | stable | LOC642879 |
| 0.419107905 | stable | LOC401137 |
| 0.419112167 | stable | UBAC2     |
| 0.41911472  | stable | LOC388565 |
| 0.419123263 | stable | MCOLN2    |
| 0.41913039  | stable | LOC650724 |
| 0.419214326 | stable | IFRG15    |
| 0.419325098 | stable | LOC255620 |
| 0.419424809 | stable | AMAC1     |
| 0.419454522 | stable | P2RY4     |
| 0.419585584 | stable | SLC39A5   |
| 0.419585584 | stable | LOC654056 |
| 0.41962     | stable | CAPN10    |
| 0.419677162 | stable | LOC648576 |
| 0.419768288 | stable | C8ORF48   |
| 0.419848662 | stable | LOC643146 |
| 0.420015587 | stable | CNIH3     |
| 0.420015587 | stable | FLJ20433  |
| 0.420024527 | stable | TUBB8     |
| 0.420059782 | stable | LOC643505 |

## DEG.infomation

|             |        |           |
|-------------|--------|-----------|
| 0.420088571 | stable | C14ORF70  |
| 0.420224027 | stable | DPPA3     |
| 0.420314955 | stable | IL22RA2   |
| 0.42039845  | stable | LRP1      |
| 0.420450997 | stable | FLJ35776  |
| 0.420450997 | stable | LOC652183 |
| 0.420450997 | stable | PRDM13    |
| 0.420450997 | stable | POU5F2    |
| 0.420450997 | stable | LOC650919 |
| 0.420468037 | stable | SLC16A8   |
| 0.420468037 | stable | LOC652808 |
| 0.420468037 | stable | GALNT4    |
| 0.420510318 | stable | MIF4GD    |
| 0.420510318 | stable | YTHDF2    |
| 0.42053937  | stable | LOC649318 |
| 0.420589836 | stable | KIAA1522  |
| 0.420589836 | stable | LOC643012 |
| 0.421054866 | stable | LOC402269 |
| 0.421115926 | stable | LOC652886 |
| 0.421117539 | stable | ADARB2    |
| 0.421430389 | stable | LOC649214 |
| 0.421430389 | stable | LOC643805 |
| 0.42150179  | stable | ZKSCAN5   |
| 0.42162867  | stable | C10ORF18  |
| 0.421831473 | stable | LOC649203 |
| 0.421831473 | stable | C3ORF65   |
| 0.422435857 | stable | LOC641810 |
| 0.422435857 | stable | MAPRE3    |
| 0.422435857 | stable | AQP6      |
| 0.422664435 | stable | GATA1     |
| 0.422892851 | stable | LOC653349 |
| 0.423030387 | stable | LOC647147 |
| 0.423361305 | stable | LARP4     |
| 0.423367327 | stable | FLJ32867  |
| 0.423395437 | stable | SMN2      |
| 0.423395437 | stable | LOC645261 |
| 0.423516929 | stable | LOC729378 |
| 0.423595893 | stable | LOC642563 |
| 0.423710831 | stable | YY2       |
| 0.423749887 | stable | AP3M1     |
| 0.423937951 | stable | LOC651004 |
| 0.424227472 | stable | WNT9A     |
| 0.42450443  | stable | MTO1      |
| 0.42450443  | stable | LOC647546 |
| 0.424604109 | stable | PSG4      |
| 0.424666126 | stable | LOC648217 |
| 0.424734104 | stable | LOC222967 |
| 0.424734104 | stable | CYB5R4    |
| 0.424734104 | stable | KLHDC4    |
| 0.424774948 | stable | LOC644876 |
| 0.424819989 | stable | CSTF1     |

## DEG.infomation

|             |        |           |
|-------------|--------|-----------|
| 0.424819989 | stable | BAT2D1    |
| 0.424819989 | stable | LOC650254 |
| 0.424825753 | stable | LOC653829 |
| 0.424825753 | stable | SF1       |
| 0.424832552 | stable | REEP2     |
| 0.424867244 | stable | FLJ42177  |
| 0.424937284 | stable | AMBP      |
| 0.424937284 | stable | NME2P1    |
| 0.425042616 | stable | TRH       |
| 0.425184414 | stable | PLVAP     |
| 0.425299259 | stable | TMEM199   |
| 0.425299259 | stable | LOC648210 |
| 0.425360156 | stable | HEMGN     |
| 0.425432232 | stable | LOC441208 |
| 0.425559933 | stable | L3MBTL4   |
| 0.425651782 | stable | LOC731999 |
| 0.425685299 | stable | UGT2B7    |
| 0.425769555 | stable | GLT1D1    |
| 0.425799671 | stable | TNPO2     |
| 0.426142341 | stable | LOC652838 |
| 0.426403706 | stable | LOC653618 |
| 0.426403706 | stable | LOC654192 |
| 0.426850521 | stable | KIF11     |
| 0.426898224 | stable | LOC647474 |
| 0.426898224 | stable | SMPD1     |
| 0.426904803 | stable | ARHGDIG   |
| 0.427033668 | stable | LOC221710 |
| 0.42707415  | stable | LOC348840 |
| 0.427158747 | stable | BAIAP3    |
| 0.427158747 | stable | LOC646554 |
| 0.42746121  | stable | LOC653641 |
| 0.42746121  | stable | LOC643341 |
| 0.427596351 | stable | OR4C46    |
| 0.427618868 | stable | PROKR2    |
| 0.427668887 | stable | LOC729786 |
| 0.427813922 | stable | LOC401252 |
| 0.427890885 | stable | LOC650235 |
| 0.428095294 | stable | LOC401101 |
| 0.428196546 | stable | PRIM2     |
| 0.428282446 | stable | ACY3      |
| 0.428484176 | stable | NCSTN     |
| 0.428522856 | stable | IDE       |
| 0.428612908 | stable | DCUN1D4   |
| 0.428746513 | stable | LOC388503 |
| 0.428746513 | stable | PRH2      |
| 0.428746513 | stable | CD300E    |
| 0.428746513 | stable | ZCCHC11   |
| 0.428824573 | stable | LOC442388 |
| 0.428963165 | stable | LOC653576 |
| 0.428963165 | stable | C3ORF31   |
| 0.428993219 | stable | LOC651231 |

DEG.infomation

|             |        |           |
|-------------|--------|-----------|
| 0.428993219 | stable | KIR2DL4   |
| 0.428993219 | stable | OCA2      |
| 0.429175851 | stable | CYORF15A  |
| 0.429365636 | stable | OR7D2     |
| 0.429365636 | stable | LOC644452 |
| 0.429365636 | stable | ANKRD35   |
| 0.429375462 | stable | FAM90A1   |
| 0.429486097 | stable | C16ORF46  |
| 0.429503512 | stable | ERCC8     |
| 0.429590627 | stable | LOC651007 |
| 0.429747812 | stable | CD81      |
| 0.429869598 | stable | GATAD1    |
| 0.429954728 | stable | LOC653507 |
| 0.429954728 | stable | TCHH      |
| 0.430057836 | stable | C8ORF46   |
| 0.430057836 | stable | LOC643937 |
| 0.430057836 | stable | XKR4      |
| 0.430057836 | stable | LOC642767 |
| 0.430251055 | stable | LOC649060 |
| 0.430265736 | stable | LOC654254 |
| 0.430423221 | stable | LOC646926 |
| 0.430438347 | stable | FGF5      |
| 0.430472861 | stable | LEKR1     |
| 0.430472861 | stable | FAM44A    |
| 0.430544715 | stable | LOC642592 |
| 0.430585523 | stable | AKAP2     |
| 0.430669752 | stable | LOC651150 |
| 0.430846155 | stable | BTBD11    |
| 0.430846155 | stable | GNG10     |
| 0.431075064 | stable | A26C3     |
| 0.431109921 | stable | LOC643808 |
| 0.431109921 | stable | CDC23     |
| 0.431189978 | stable | SUMF2     |
| 0.431189978 | stable | TFDP1     |
| 0.431217998 | stable | LOC641996 |
| 0.431223469 | stable | LOC646627 |
| 0.431223469 | stable | PARC      |
| 0.431299347 | stable | SPRR2C    |
| 0.431562137 | stable | SLC28A1   |
| 0.431672746 | stable | BCCIP     |
| 0.431672746 | stable | LOC388849 |
| 0.43176959  | stable | TMPRSS11D |
| 0.43176959  | stable | LOC644360 |
| 0.43176959  | stable | C22ORF23  |
| 0.43194165  | stable | LOC644003 |
| 0.432063486 | stable | CERKL     |
| 0.432316199 | stable | RFT1      |
| 0.432316199 | stable | TAF12     |
| 0.43248404  | stable | SLC25A34  |
| 0.43248404  | stable | F9        |
| 0.432575886 | stable | ARID2     |

DEG.infomation

|             |        |           |
|-------------|--------|-----------|
| 0.432626058 | stable | KIAA1530  |
| 0.432626058 | stable | PCAF      |
| 0.432708957 | stable | PYDC1     |
| 0.432708957 | stable | LOC339674 |
| 0.432708957 | stable | LOC641365 |
| 0.432708957 | stable | PPP1R2P3  |
| 0.432768489 | stable | TRAM2     |
| 0.43288283  | stable | LOC644884 |
| 0.43288283  | stable | C4ORF23   |
| 0.432939817 | stable | C1ORF129  |
| 0.433058639 | stable | FAM81B    |
| 0.433100718 | stable | LOC285768 |
| 0.433278422 | stable | LOC654252 |
| 0.433363743 | stable | STX11     |
| 0.433397384 | stable | CHD9      |
| 0.433405416 | stable | LOC388963 |
| 0.433426036 | stable | MRPS31    |
| 0.433630449 | stable | SGTB      |
| 0.433632738 | stable | LOC643949 |
| 0.433658339 | stable | LOC402617 |
| 0.433720363 | stable | ELMOD1    |
| 0.433806326 | stable | COX11     |
| 0.434160079 | stable | C19ORF35  |
| 0.434402184 | stable | FAM83C    |
| 0.434402184 | stable | ZNF446    |
| 0.434402184 | stable | FLJ46300  |
| 0.434630808 | stable | MEGF11    |
| 0.434630808 | stable | LOC284422 |
| 0.434662911 | stable | LOC220433 |
| 0.434740811 | stable | WDR41     |
| 0.434751229 | stable | ITPR1     |
| 0.434868421 | stable | RGPD7     |
| 0.434924192 | stable | LOC645294 |
| 0.434930333 | stable | LOC643131 |
| 0.434939265 | stable | LOC643070 |
| 0.434953758 | stable | LOC728516 |
| 0.435001682 | stable | ZNF582    |
| 0.435027919 | stable | F2R       |
| 0.435227917 | stable | PRAP1     |
| 0.435229931 | stable | LOC728285 |
| 0.435229931 | stable | LOC388915 |
| 0.435237069 | stable | ZNF620    |
| 0.435278017 | stable | ZNF609    |
| 0.435412235 | stable | LOC388312 |
| 0.435552103 | stable | LOC728811 |
| 0.435555949 | stable | LOC647711 |
| 0.435568822 | stable | LOC651892 |
| 0.435568822 | stable | LOC643662 |
| 0.435666082 | stable | CASKIN1   |
| 0.435722367 | stable | DISP1     |
| 0.436229244 | stable | GLT8D4    |



## DEG.infomation

|             |        |           |
|-------------|--------|-----------|
| 0.436232523 | stable | MRPL23    |
| 0.436265631 | stable | RPS6KB1   |
| 0.436269907 | stable | MAPK10    |
| 0.436326314 | stable | DEFB104B  |
| 0.436361476 | stable | UFC1      |
| 0.436494427 | stable | CTSD      |
| 0.436556761 | stable | LOC647208 |
| 0.43675013  | stable | LOC642995 |
| 0.43675013  | stable | LOC651503 |
| 0.437014332 | stable | DDI1      |
| 0.437024373 | stable | LOC649978 |
| 0.437027899 | stable | CCDC35    |
| 0.437118899 | stable | DYNC2H1   |
| 0.43714629  | stable | C1ORF21   |
| 0.43714629  | stable | LOC650853 |
| 0.43714629  | stable | LOC651738 |
| 0.437173364 | stable | LOC441205 |
| 0.437173364 | stable | VIL1      |
| 0.437257469 | stable | LGR5      |
| 0.43732206  | stable | FLJ45684  |
| 0.43732206  | stable | PDCL2     |
| 0.437366962 | stable | DMRTA2    |
| 0.437366962 | stable | VKORC1    |
| 0.43741694  | stable | FMR1      |
| 0.437659906 | stable | OR13A1    |
| 0.437659906 | stable | MCRS1     |
| 0.437784422 | stable | MAP4K5    |
| 0.437784422 | stable | LOC613206 |
| 0.437990192 | stable | OLIG2     |
| 0.438009255 | stable | GPM6A     |
| 0.438014265 | stable | ZNF597    |
| 0.438285526 | stable | LOC651731 |
| 0.438313161 | stable | LOC651202 |
| 0.438315962 | stable | LOC729758 |
| 0.438315962 | stable | ZNF480    |
| 0.438315962 | stable | TCBA1     |
| 0.438315962 | stable | SIRPB1    |
| 0.43836974  | stable | MGC70870  |
| 0.438435956 | stable | LOC651314 |
| 0.438474689 | stable | LTBP1     |
| 0.438774746 | stable | RPS6      |
| 0.438774746 | stable | ODF3L1    |
| 0.438774746 | stable | TMPRSS11A |
| 0.438833499 | stable | OR9A2     |
| 0.438833499 | stable | GPR112    |
| 0.438862208 | stable | EXOC5     |
| 0.438862208 | stable | LOC648041 |
| 0.438862208 | stable | AQP2      |
| 0.438934566 | stable | FAM126B   |
| 0.438934566 | stable | LOC645899 |
| 0.438941884 | stable | TMEM89    |

DEG.infomation

|             |        |           |
|-------------|--------|-----------|
| 0.438983158 | stable | SERPINB5  |
| 0.439027263 | stable | LOC649910 |
| 0.439161737 | stable | CALM2     |
| 0.439227469 | stable | HSD11B1   |
| 0.439299627 | stable | C8ORF41   |
| 0.439299627 | stable | UNC45A    |
| 0.439336946 | stable | LOC389671 |
| 0.439336946 | stable | PSMG3     |
| 0.439425424 | stable | COG8      |
| 0.43945909  | stable | LOC647328 |
| 0.439490568 | stable | EIF3E     |
| 0.439490568 | stable | DNAJC27   |
| 0.439760735 | stable | MAK16     |
| 0.439762871 | stable | SMG1      |
| 0.439955779 | stable | KRTAP10-8 |
| 0.439967035 | stable | HBG1      |
| 0.440183269 | stable | LOC648943 |
| 0.44028995  | stable | C4ORF17   |
| 0.440381874 | stable | PTPRG     |
| 0.44066527  | stable | KIAA0317  |
| 0.440678238 | stable | LOC440706 |
| 0.440678238 | stable | CCL20     |
| 0.441042491 | stable | ANKRD13C  |
| 0.441050947 | stable | PARG      |
| 0.441107351 | stable | LOC642987 |
| 0.441107351 | stable | XAGE1B    |
| 0.441107351 | stable | HS3ST3B1  |
| 0.441127045 | stable | LOC388900 |
| 0.441132999 | stable | SELO      |
| 0.441460313 | stable | TMEM161B  |
| 0.441472256 | stable | PTPN7     |
| 0.441527873 | stable | C1ORF141  |
| 0.441538221 | stable | LOC441870 |
| 0.441538221 | stable | PIGQ      |
| 0.441538221 | stable | LOC646279 |
| 0.441562968 | stable | LOC113386 |
| 0.441562968 | stable | UBXD6     |
| 0.441593718 | stable | C22ORF33  |
| 0.441823539 | stable | RPL38     |
| 0.441823539 | stable | GJA9      |
| 0.441909073 | stable | CDIPT     |
| 0.442264024 | stable | CHAF1A    |
| 0.442264024 | stable | CLDN12    |
| 0.442500652 | stable | DNHL1     |
| 0.442500652 | stable | LOC440577 |
| 0.44251815  | stable | BTN3A3    |
| 0.442730682 | stable | HIT-40    |
| 0.442794287 | stable | ANXA13    |
| 0.442820961 | stable | SOX1      |
| 0.442976704 | stable | MGC33407  |
| 0.443002212 | stable | GPR37L1   |

## DEG.infomation

|             |        |           |
|-------------|--------|-----------|
| 0.443130389 | stable | LOC645686 |
| 0.44313606  | stable | LOC389787 |
| 0.443223161 | stable | ADAM20    |
| 0.443244991 | stable | CSTA      |
| 0.443244991 | stable | LOC400713 |
| 0.443264497 | stable | ZBTB41    |
| 0.443313185 | stable | RAPGEF6   |
| 0.443313185 | stable | LOC643350 |
| 0.443317208 | stable | LOC653146 |
| 0.443487204 | stable | HDAC11    |
| 0.443489236 | stable | LOC389842 |
| 0.443636721 | stable | LOC651848 |
| 0.443665476 | stable | LOC645576 |
| 0.4436716   | stable | HIST1H2BA |
| 0.44399888  | stable | UBL4B     |
| 0.44399888  | stable | LOC390561 |
| 0.44399888  | stable | KCNH1     |
| 0.444014021 | stable | LOC647089 |
| 0.444065462 | stable | NME6      |
| 0.444293095 | stable | KRTAP19-2 |
| 0.444307891 | stable | LOC650599 |
| 0.444465882 | stable | OCEL1     |
| 0.444556527 | stable | LOC402562 |
| 0.444556527 | stable | LOC652111 |
| 0.444812408 | stable | ZMAT5     |
| 0.444849714 | stable | C21ORF86  |
| 0.444919362 | stable | DAZ1      |
| 0.444944179 | stable | GJA8      |
| 0.445198077 | stable | CABYR     |
| 0.445201919 | stable | ZNF556    |
| 0.445201919 | stable | IL5       |
| 0.445201919 | stable | LOC648392 |
| 0.445201919 | stable | RTEL1     |
| 0.445201919 | stable | ZNF223    |
| 0.445201919 | stable | KLHDC3    |
| 0.445201919 | stable | FLJ30058  |
| 0.445201919 | stable | TAF3      |
| 0.445201919 | stable | DYNC111   |
| 0.445201919 | stable | LOC644652 |
| 0.445285781 | stable | IGF2AS    |
| 0.445285781 | stable | LOC646010 |
| 0.445321993 | stable | KIAA1666  |
| 0.445321993 | stable | TMPRSS11B |
| 0.445343187 | stable | IL22      |
| 0.445381031 | stable | LOC653037 |
| 0.445475457 | stable | GPR6      |
| 0.445518554 | stable | LOC648590 |
| 0.445518554 | stable | C12ORF71  |
| 0.445943094 | stable | LOC645012 |
| 0.446141296 | stable | LOC651102 |
| 0.446141296 | stable | LOC440995 |

## DEG.infomation

|             |        |                 |
|-------------|--------|-----------------|
| 0.446185356 | stable | LOC650712       |
| 0.446286246 | stable | LOC646675       |
| 0.446292909 | stable | LOC646198       |
| 0.446338391 | stable | KIAA1922        |
| 0.446338391 | stable | KRT73           |
| 0.446349625 | stable | C1ORF172        |
| 0.446423884 | stable | FLJ43582        |
| 0.446512073 | stable | LOC387873       |
| 0.446592779 | stable | ATXN8OS         |
| 0.446623437 | stable | SLC5A11         |
| 0.446728256 | stable | UGT2A1          |
| 0.44674895  | stable | LOC645363       |
| 0.446822198 | stable | LOC649428       |
| 0.447167554 | stable | DOK1            |
| 0.447343405 | stable | APPBP2          |
| 0.447589668 | stable | LOC389830       |
| 0.447638883 | stable | LOC730130       |
| 0.447724048 | stable | C16ORF5         |
| 0.447724048 | stable | SLIC1           |
| 0.447913849 | stable | METT11D1        |
| 0.447972011 | stable | PHF19           |
| 0.448031786 | stable | LOC642629       |
| 0.448064288 | stable | LOC402483       |
| 0.448153624 | stable | TFAMP1          |
| 0.448196873 | stable | LOC652200       |
| 0.448225139 | stable | PRKCG           |
| 0.448277176 | stable | BDP1            |
| 0.448305278 | stable | TGOLN2          |
| 0.448416104 | stable | LOC653533       |
| 0.448480435 | stable | TNFSF12-TNFSF13 |
| 0.44862163  | stable | SNRPD1          |
| 0.448654417 | stable | LOC389641       |
| 0.448756801 | stable | CPSF3           |
| 0.448889978 | stable | KIR3DX1         |
| 0.448907927 | stable | FBXL21          |
| 0.448907927 | stable | KIAA0514        |
| 0.448907927 | stable | LOC651430       |
| 0.448914522 | stable | IFNA17          |
| 0.448955885 | stable | PRR3            |
| 0.449025851 | stable | AGAP1           |
| 0.449025851 | stable | KRT86           |
| 0.449092026 | stable | PBRM1           |
| 0.449325306 | stable | FLJ90650        |
| 0.449350658 | stable | ACSM5           |
| 0.449849773 | stable | LOC644468       |
| 0.450017228 | stable | FAM174B         |
| 0.450117707 | stable | CHURC1          |
| 0.450314705 | stable | LOC643770       |
| 0.450396102 | stable | CYLC1           |
| 0.450645216 | stable | LOC651728       |
| 0.450731708 | stable | STCH            |

## DEG.infomation

|             |        |           |
|-------------|--------|-----------|
| 0.450775206 | stable | LOC442020 |
| 0.450871818 | stable | PLCXD2    |
| 0.450871818 | stable | FAM128A   |
| 0.450871818 | stable | DMWD      |
| 0.451003244 | stable | ATF7      |
| 0.4510437   | stable | SLC2A4RG  |
| 0.4510437   | stable | APLNR     |
| 0.451046557 | stable | LOC729602 |
| 0.451152956 | stable | MGC33894  |
| 0.451171243 | stable | AADAACL3  |
| 0.451281365 | stable | CPNE7     |
| 0.451300439 | stable | GRIN2C    |
| 0.451326247 | stable | WHDC1L2   |
| 0.451426526 | stable | MGC42105  |
| 0.451452833 | stable | RAP2B     |
| 0.451862666 | stable | SCML4     |
| 0.452245102 | stable | LOC124216 |
| 0.452847166 | stable | LOC728183 |
| 0.452918719 | stable | LOC149224 |
| 0.452918719 | stable | CATSPER1  |
| 0.453061868 | stable | LIX1      |
| 0.453061868 | stable | RNF212    |
| 0.453184528 | stable | GNG3      |
| 0.453185398 | stable | GMNN      |
| 0.453193104 | stable | IL23R     |
| 0.453243792 | stable | NPAL3     |
| 0.453398914 | stable | CD28      |
| 0.453403864 | stable | TOMM22    |
| 0.453473575 | stable | ACAA1     |
| 0.453510865 | stable | CCDC88B   |
| 0.453510865 | stable | SNW1      |
| 0.453570642 | stable | LOC652288 |
| 0.453603087 | stable | LOC401410 |
| 0.453867605 | stable | LOC650314 |
| 0.453909445 | stable | SLC39A4   |
| 0.453909445 | stable | USH1G     |
| 0.453936134 | stable | LOC644558 |
| 0.453936134 | stable | C20ORF133 |
| 0.453980412 | stable | RNF180    |
| 0.454163132 | stable | KCNA1     |
| 0.454163132 | stable | PGAM2     |
| 0.454287778 | stable | MYEOV2    |
| 0.454309575 | stable | MORN5     |
| 0.454309575 | stable | LOC653325 |
| 0.454581935 | stable | LOC642433 |
| 0.454734156 | stable | CLDN2     |
| 0.455102517 | stable | PRDM9     |
| 0.455397443 | stable | MTRR      |
| 0.455626811 | stable | SLC2A5    |
| 0.455641316 | stable | TRIT1     |
| 0.455641316 | stable | PRB4      |

DEG.infomation

|             |        |           |
|-------------|--------|-----------|
| 0.455641316 | stable | LOC653962 |
| 0.455706339 | stable | LOC651272 |
| 0.455815468 | stable | LOC652127 |
| 0.45593415  | stable | RAET1E    |
| 0.455976514 | stable | USH2A     |
| 0.455976514 | stable | VAX1      |
| 0.455976514 | stable | LOC653280 |
| 0.455976514 | stable | SSTR4     |
| 0.456429224 | stable | LOC345630 |
| 0.456519672 | stable | GTPBP1    |
| 0.456755267 | stable | VCX3A     |
| 0.457008749 | stable | DUXA      |
| 0.457008749 | stable | LOC441251 |
| 0.457013291 | stable | LOC646491 |
| 0.457013291 | stable | C19ORF66  |
| 0.457187705 | stable | TFAP2C    |
| 0.457187705 | stable | SNAPC1    |
| 0.457399473 | stable | HPR       |
| 0.45755166  | stable | LOC652850 |
| 0.457715118 | stable | MIA2      |
| 0.457723393 | stable | LOC645992 |
| 0.457892864 | stable | LOC728621 |
| 0.458082146 | stable | XKRX      |
| 0.45817621  | stable | RAD1      |
| 0.45817621  | stable | ADAM30    |
| 0.458287507 | stable | C16ORF3   |
| 0.4583048   | stable | LOC649317 |
| 0.458475858 | stable | COL24A1   |
| 0.458475858 | stable | PTPRS     |
| 0.45851064  | stable | LOC649956 |
| 0.458654602 | stable | TMEM202   |
| 0.458711362 | stable | DHDDS     |
| 0.458860526 | stable | LOC644399 |
| 0.458883013 | stable | LOC645869 |
| 0.458883013 | stable | HOXC13    |
| 0.45893277  | stable | MGC27121  |
| 0.45893277  | stable | ANXA10    |
| 0.45903633  | stable | CD6       |
| 0.45903633  | stable | LOC388720 |
| 0.459165478 | stable | LOC116412 |
| 0.459165478 | stable | LOC642730 |
| 0.459248613 | stable | HPCAL4    |
| 0.459329317 | stable | PCDHB10   |
| 0.459329317 | stable | PFN3      |
| 0.459334717 | stable | CYP3A5    |
| 0.459346949 | stable | NPY2R     |
| 0.45970752  | stable | LOC345643 |
| 0.459733827 | stable | LOC441771 |
| 0.459788897 | stable | RAB3D     |
| 0.459829955 | stable | LOC641805 |
| 0.46001799  | stable | LOC642380 |

## DEG.infomation

|             |        |            |
|-------------|--------|------------|
| 0.460032463 | stable | FAM75A2    |
| 0.460126442 | stable | MSI2       |
| 0.460331568 | stable | C8ORFK32   |
| 0.460436219 | stable | LOC649948  |
| 0.460660854 | stable | HOXD1      |
| 0.460895351 | stable | LOC648705  |
| 0.460895351 | stable | GRIA4      |
| 0.460895351 | stable | LOC652513  |
| 0.461036297 | stable | TMEM132E   |
| 0.461146452 | stable | AK7        |
| 0.461146452 | stable | OCLN       |
| 0.461146452 | stable | POLR1A     |
| 0.461203391 | stable | C9ORF31    |
| 0.461268347 | stable | TIMM8B     |
| 0.461387433 | stable | ZMYM5      |
| 0.461468658 | stable | RBM11      |
| 0.461561242 | stable | XGPY2      |
| 0.461689109 | stable | RNF138     |
| 0.461690987 | stable | LOC642505  |
| 0.461690987 | stable | CUZD1      |
| 0.461762108 | stable | GRAMD2     |
| 0.461975816 | stable | ANKRD33    |
| 0.461975816 | stable | LOC650261  |
| 0.461975816 | stable | RTP3       |
| 0.462100448 | stable | KRTAP4-3   |
| 0.462104172 | stable | LOC389901  |
| 0.462155447 | stable | LOC642961  |
| 0.462155447 | stable | CLU        |
| 0.462155447 | stable | LOC646997  |
| 0.462253737 | stable | ERVK6      |
| 0.462286675 | stable | HMCN1      |
| 0.462349205 | stable | FAM38B     |
| 0.462431347 | stable | LOC283755  |
| 0.462518463 | stable | C8ORF15    |
| 0.462538759 | stable | KDR        |
| 0.462703927 | stable | UGT3A2     |
| 0.462757561 | stable | LOC650311  |
| 0.462861074 | stable | NDUFAB1    |
| 0.462930583 | stable | LOC643953  |
| 0.463058122 | stable | SLC45A1    |
| 0.463123074 | stable | KCNJ10     |
| 0.463123074 | stable | RAD51AP2   |
| 0.46313216  | stable | C9ORF153   |
| 0.46313216  | stable | GADD45GIP1 |
| 0.463222804 | stable | REM1       |
| 0.463222804 | stable | KERA       |
| 0.463227651 | stable | LOC652369  |
| 0.463243243 | stable | LOC644477  |
| 0.463277633 | stable | TTC39B     |
| 0.463277633 | stable | LOC652819  |
| 0.463282286 | stable | LOC646334  |

## DEG.infomation

|             |        |           |
|-------------|--------|-----------|
| 0.463282286 | stable | INE1      |
| 0.463305597 | stable | LOC440352 |
| 0.463305597 | stable | LOC651125 |
| 0.463305597 | stable | LOC728095 |
| 0.463305597 | stable | FUZ       |
| 0.463379681 | stable | LOC642583 |
| 0.463379681 | stable | FLJ35848  |
| 0.463386696 | stable | RARRES2   |
| 0.463578649 | stable | LOC653324 |
| 0.463578649 | stable | LOC392197 |
| 0.463578649 | stable | LOC649091 |
| 0.463578649 | stable | SSTR2     |
| 0.463605461 | stable | C4ORF21   |
| 0.463722688 | stable | RKHD1     |
| 0.463722688 | stable | TARS      |
| 0.463741016 | stable | LOC650543 |
| 0.463770972 | stable | MGC5139   |
| 0.463909565 | stable | TRIM72    |
| 0.463960912 | stable | LOC652594 |
| 0.463994243 | stable | ZNF138    |
| 0.464048127 | stable | LOC441617 |
| 0.464152774 | stable | RNPEPL1   |
| 0.464196214 | stable | COX8A     |
| 0.464196214 | stable | LOC730194 |
| 0.464196214 | stable | TNNI1     |
| 0.464196214 | stable | MAGI1     |
| 0.464329311 | stable | LOC728229 |
| 0.464329311 | stable | UNC119    |
| 0.464360203 | stable | RPL4      |
| 0.464361926 | stable | LOC642453 |
| 0.464361926 | stable | LOC285444 |
| 0.464425954 | stable | LOC728654 |
| 0.464523857 | stable | APOBEC3A  |
| 0.464523857 | stable | RPL35A    |
| 0.464552993 | stable | STATH     |
| 0.464552993 | stable | MPP5      |
| 0.464654619 | stable | LOC642591 |
| 0.46484713  | stable | PPARBP    |
| 0.464872296 | stable | RPS6KL1   |
| 0.464898172 | stable | LOC653135 |
| 0.464899807 | stable | C1QBP     |
| 0.46500511  | stable | ZNF586    |
| 0.46500511  | stable | KENAE     |
| 0.465102054 | stable | FLJ45974  |
| 0.465102054 | stable | LY6G6D    |
| 0.465102054 | stable | COL18A1   |
| 0.46526837  | stable | C3ORF14   |
| 0.465630508 | stable | LOC644767 |
| 0.465630508 | stable | CEMP1     |
| 0.465630508 | stable | LOC648432 |
| 0.465786436 | stable | NFAM1     |



## DEG.infomation

|             |        |           |
|-------------|--------|-----------|
| 0.465807454 | stable | ACHE      |
| 0.465807454 | stable | RAD9A     |
| 0.46599797  | stable | DRD1      |
| 0.466007943 | stable | ARHGEF10L |
| 0.466160412 | stable | LOC342931 |
| 0.46642232  | stable | OR1S2     |
| 0.46642232  | stable | LOC642168 |
| 0.466536975 | stable | SRD5A3    |
| 0.466623287 | stable | MGC46336  |
| 0.466623287 | stable | LOC645836 |
| 0.46672804  | stable | LOC647748 |
| 0.46672804  | stable | LOC649128 |
| 0.466797322 | stable | MFI2      |
| 0.46680766  | stable | LYZL2     |
| 0.467004617 | stable | ZAN       |
| 0.467219735 | stable | LOC440550 |
| 0.467377755 | stable | LOC441773 |
| 0.467391917 | stable | TMOD3     |
| 0.467400039 | stable | SLC10A6   |
| 0.467400039 | stable | GFI1      |
| 0.467400039 | stable | IFNW1     |
| 0.467400039 | stable | IQSEC1    |
| 0.467420862 | stable | SPATA3    |
| 0.467420862 | stable | LOC642278 |
| 0.467582823 | stable | LOC648253 |
| 0.468033596 | stable | ZNF469    |
| 0.468033596 | stable | WDR42B    |
| 0.468069327 | stable | LOC645153 |
| 0.468084463 | stable | RLF       |
| 0.468084463 | stable | ZSCAN1    |
| 0.468084463 | stable | MARVELD3  |
| 0.468084463 | stable | LOC642608 |
| 0.468084463 | stable | MBL2      |
| 0.468193428 | stable | LOC649063 |
| 0.468219085 | stable | RNF190    |
| 0.468373752 | stable | LOC285407 |
| 0.468414878 | stable | LOC649571 |
| 0.468440759 | stable | LOC649800 |
| 0.46845923  | stable | RPL19     |
| 0.46845923  | stable | PSRC1     |
| 0.468610989 | stable | FIGLA     |
| 0.468615211 | stable | FAM7A3    |
| 0.468615211 | stable | LOC644591 |
| 0.468660998 | stable | LOC441476 |
| 0.468719487 | stable | C21ORF29  |
| 0.468719487 | stable | LOC647413 |
| 0.468793497 | stable | ASAM      |
| 0.468959784 | stable | PRMT3     |
| 0.469001647 | stable | XAF1      |
| 0.469001647 | stable | ADORA2A   |
| 0.469001647 | stable | LOC653696 |

## DEG.infomation

|             |        |           |
|-------------|--------|-----------|
| 0.469001647 | stable | LOC647058 |
| 0.469102354 | stable | VCAM1     |
| 0.469102354 | stable | TCERG1    |
| 0.469164193 | stable | LOC642981 |
| 0.469180799 | stable | ZFYVE27   |
| 0.469210833 | stable | LOC646399 |
| 0.469210833 | stable | DEFB134   |
| 0.469318232 | stable | LOC285697 |
| 0.469366538 | stable | LOC648257 |
| 0.469366538 | stable | SFXN3     |
| 0.469477489 | stable | THEM2     |
| 0.469477489 | stable | BTNL8     |
| 0.469477489 | stable | OR13J1    |
| 0.469477489 | stable | LOC440030 |
| 0.469655398 | stable | COL4A1    |
| 0.469672765 | stable | PI16      |
| 0.469863376 | stable | HOOK3     |
| 0.469863376 | stable | MTSS1     |
| 0.469863376 | stable | NRF1      |
| 0.470110776 | stable | FLJ44653  |
| 0.470111159 | stable | ACADS     |
| 0.470111159 | stable | LOC646439 |
| 0.470170344 | stable | LOC730302 |
| 0.470328998 | stable | PLEKHG4   |
| 0.470328998 | stable | MAN2A2    |
| 0.470664532 | stable | OSBPL10   |
| 0.470664532 | stable | DUX4      |
| 0.470713608 | stable | FLJ39739  |
| 0.470884318 | stable | POGZ      |
| 0.470939841 | stable | CYP27B1   |
| 0.471042897 | stable | LOC643700 |
| 0.471229255 | stable | SLC9A3R2  |
| 0.471229255 | stable | SLC1A6    |
| 0.471318191 | stable | LOC642428 |
| 0.47134345  | stable | LOC653852 |
| 0.471386651 | stable | TMEM97    |
| 0.471514206 | stable | LOC643943 |
| 0.47152305  | stable | LOC647374 |
| 0.471527073 | stable | CPSF6     |
| 0.471527073 | stable | LOC647797 |
| 0.471527073 | stable | CIB3      |
| 0.471527073 | stable | MYH7      |
| 0.471649194 | stable | LOC651319 |
| 0.471706987 | stable | LOC643772 |
| 0.471723204 | stable | CDH11     |
| 0.471976746 | stable | B3GN-T6   |
| 0.472053998 | stable | ATN1      |
| 0.472053998 | stable | DYX1C1    |
| 0.472053998 | stable | LOC643132 |
| 0.472053998 | stable | CLDN11    |
| 0.472053998 | stable | LOC650214 |

## DEG.infomation

|             |        |           |
|-------------|--------|-----------|
| 0.472053998 | stable | SLC47A2   |
| 0.472053998 | stable | LOC649009 |
| 0.472053998 | stable | LOC389816 |
| 0.472053998 | stable | CST7      |
| 0.472086619 | stable | LOC652282 |
| 0.472140634 | stable | DKKL1     |
| 0.472140634 | stable | GPR19     |
| 0.472146058 | stable | LOC643930 |
| 0.47215636  | stable | OR4C11    |
| 0.47215636  | stable | LOC283440 |
| 0.47215636  | stable | CTRB1     |
| 0.47215636  | stable | LOC391656 |
| 0.47215636  | stable | MAZ       |
| 0.47215636  | stable | FBXL4     |
| 0.47215636  | stable | KCNJ13    |
| 0.47215636  | stable | C18ORF25  |
| 0.47234795  | stable | LOC649991 |
| 0.472450695 | stable | LOC440848 |
| 0.472450695 | stable | STAU2     |
| 0.472561608 | stable | ZNF322B   |
| 0.472561608 | stable | UGT2B17   |
| 0.472561608 | stable | TNF       |
| 0.472561608 | stable | LOC643853 |
| 0.47259835  | stable | LOC127099 |
| 0.472866536 | stable | LOC441811 |
| 0.472918769 | stable | LOC441098 |
| 0.472994976 | stable | C1ORF194  |
| 0.473108229 | stable | FLJ33996  |
| 0.473348864 | stable | RHOQ      |
| 0.473372163 | stable | PIP5K2B   |
| 0.473585678 | stable | C2ORF60   |
| 0.473585678 | stable | C17ORF76  |
| 0.473624832 | stable | GPER      |
| 0.473905837 | stable | RUNDC3A   |
| 0.473955183 | stable | C16ORF85  |
| 0.474004177 | stable | TMIGD2    |
| 0.474033419 | stable | ASCC1     |
| 0.474223808 | stable | DSG2      |
| 0.474246587 | stable | ARNTL2    |
| 0.474293544 | stable | FAM108B1  |
| 0.474478407 | stable | ROBO3     |
| 0.474538993 | stable | LOC653387 |
| 0.474601489 | stable | DPYS      |
| 0.474601489 | stable | FLJ41423  |
| 0.474601489 | stable | ACPT      |
| 0.474740156 | stable | SAMD12    |
| 0.474827731 | stable | AP1S1     |
| 0.474844059 | stable | CDH13     |
| 0.474844059 | stable | LOC652100 |
| 0.474844059 | stable | LOC647213 |
| 0.474844059 | stable | LOC646067 |

DEG.infomation

|             |        |               |
|-------------|--------|---------------|
| 0.474844059 | stable | LOC648170     |
| 0.474844059 | stable | UGT2A3        |
| 0.474844059 | stable | CBX5          |
| 0.474844059 | stable | NEUROD2       |
| 0.474946067 | stable | PTPN20        |
| 0.474954179 | stable | CLUAP1        |
| 0.474954179 | stable | NT5E          |
| 0.47497094  | stable | LOC646512     |
| 0.47497094  | stable | AMICA1        |
| 0.475133776 | stable | BRCA2         |
| 0.475133776 | stable | LOC646299     |
| 0.475166494 | stable | B3GALT6       |
| 0.475171016 | stable | APOA1BP       |
| 0.475220352 | stable | LOC51149      |
| 0.475280229 | stable | SRPX2         |
| 0.475294231 | stable | DKFZP781N1041 |
| 0.475294231 | stable | LOC651530     |
| 0.475330369 | stable | TTC29         |
| 0.475401493 | stable | DGKK          |
| 0.475751831 | stable | ARVCF         |
| 0.475751831 | stable | SLC38A5       |
| 0.475751831 | stable | LOC653316     |
| 0.475751831 | stable | TTY6B         |
| 0.475751831 | stable | LOC339902     |
| 0.475809183 | stable | INPP5A        |
| 0.475809183 | stable | LOC653577     |
| 0.475809183 | stable | FLJ32569      |
| 0.475893694 | stable | TMEM92        |
| 0.475970168 | stable | TMEM121       |
| 0.476074559 | stable | LOC151234     |
| 0.47611031  | stable | LOC440829     |
| 0.47611031  | stable | AR            |
| 0.476255756 | stable | MAST1         |
| 0.476344009 | stable | C20ORF134     |
| 0.476344009 | stable | LOC653319     |
| 0.476344009 | stable | LOC643599     |
| 0.476344009 | stable | CSAG3A        |
| 0.476415439 | stable | MAPK8IP3      |
| 0.476471922 | stable | LOC651617     |
| 0.476514651 | stable | LOC650568     |
| 0.476536616 | stable | LOC730118     |
| 0.476536616 | stable | LOC729826     |
| 0.476570536 | stable | SLC30A10      |
| 0.476685567 | stable | ANO8          |
| 0.47688764  | stable | SNORD22       |
| 0.477008386 | stable | ABHD13        |
| 0.477008386 | stable | C12ORF40      |
| 0.477008386 | stable | CDYL          |
| 0.477173677 | stable | FLJ45994      |
| 0.477377588 | stable | LOC595101     |
| 0.477377588 | stable | PPP2R2D       |

## DEG.infomation

|             |        |           |
|-------------|--------|-----------|
| 0.477639712 | stable | CTTNBP2NL |
| 0.477683675 | stable | LOC653434 |
| 0.477683675 | stable | LOC200810 |
| 0.477683675 | stable | TMPRSS7   |
| 0.477725733 | stable | IMPA1     |
| 0.477725733 | stable | OR1E1     |
| 0.478015199 | stable | LOC651554 |
| 0.478096902 | stable | PITPNB    |
| 0.478110619 | stable | ENOX1     |
| 0.478110619 | stable | ABL2      |
| 0.478110619 | stable | CDKAL1    |
| 0.478116021 | stable | LOC649192 |
| 0.478116021 | stable | KLC4      |
| 0.478262633 | stable | KIAA1109  |
| 0.478262633 | stable | C8ORF71   |
| 0.478262633 | stable | PGC       |
| 0.478262633 | stable | MEF2A     |
| 0.478315699 | stable | FLJ21839  |
| 0.478315699 | stable | LOC644668 |
| 0.478408718 | stable | LOC650930 |
| 0.47854694  | stable | LHPP      |
| 0.47854694  | stable | ACOT2     |
| 0.47857653  | stable | FLJ30851  |
| 0.478577827 | stable | TBC1D21   |
| 0.47861264  | stable | GSTA2     |
| 0.47861264  | stable | ZNF100    |
| 0.478719356 | stable | LOC653820 |
| 0.478719356 | stable | PAK4      |
| 0.478746336 | stable | CSNK2B    |
| 0.4788045   | stable | MECP2     |
| 0.478833184 | stable | SYNGR4    |
| 0.478833184 | stable | LOC90120  |
| 0.478884065 | stable | TMEM19    |
| 0.478911356 | stable | ADK       |
| 0.47902385  | stable | LOC728556 |
| 0.479041938 | stable | CYP4A11   |
| 0.479041938 | stable | LOC644734 |
| 0.479083109 | stable | LOC731670 |
| 0.479155821 | stable | LOC646903 |
| 0.479417079 | stable | DPP10     |
| 0.479417079 | stable | WNT9B     |
| 0.479417079 | stable | ASAH3L    |
| 0.479431001 | stable | LOC652469 |
| 0.479431001 | stable | LOC645276 |
| 0.479652356 | stable | LOC647309 |
| 0.479654379 | stable | LOC652761 |
| 0.479654379 | stable | UBFD1     |
| 0.479791533 | stable | ODZ1      |
| 0.479890849 | stable | LOC285588 |
| 0.480093247 | stable | LOC645427 |
| 0.480136151 | stable | EHBP1     |

## DEG.infomation

|             |        |           |
|-------------|--------|-----------|
| 0.480171276 | stable | KIAA1843  |
| 0.480219341 | stable | C12ORF29  |
| 0.480222263 | stable | MYOM3     |
| 0.480323329 | stable | LOC727805 |
| 0.480729811 | stable | LOC642978 |
| 0.480730417 | stable | ATP6V1G3  |
| 0.480975368 | stable | LOC644135 |
| 0.481123338 | stable | LOC642503 |
| 0.481123338 | stable | LOC645481 |
| 0.481123338 | stable | C2ORF16   |
| 0.481148357 | stable | LOC643582 |
| 0.481148357 | stable | FHL2      |
| 0.481148357 | stable | ODF1      |
| 0.481148357 | stable | FLJ20972  |
| 0.481148357 | stable | CEBPE     |
| 0.481225711 | stable | LOC653423 |
| 0.481247587 | stable | KRT27     |
| 0.481420792 | stable | ADAMDEC1  |
| 0.481571741 | stable | LOC653094 |
| 0.48180912  | stable | LOC340598 |
| 0.481902709 | stable | HLX       |
| 0.481918193 | stable | OR7D4     |
| 0.482177477 | stable | LOC649848 |
| 0.482392982 | stable | LOC649908 |
| 0.482403529 | stable | ATP5D     |
| 0.482436836 | stable | C2ORF50   |
| 0.482436836 | stable | ILKAP     |
| 0.483002499 | stable | SNORA62   |
| 0.483167242 | stable | GZMH      |
| 0.483268922 | stable | PAGE5     |
| 0.483316603 | stable | LHX9      |
| 0.483316603 | stable | LOC643878 |
| 0.483316603 | stable | TAF1L     |
| 0.483378212 | stable | GSTCD     |
| 0.483378212 | stable | FAM134A   |
| 0.483378212 | stable | LINGO2    |
| 0.483378212 | stable | TRPM5     |
| 0.483378212 | stable | LOC650717 |
| 0.483591529 | stable | DTX1      |
| 0.483595255 | stable | CMA1      |
| 0.483732844 | stable | GALR1     |
| 0.483895436 | stable | LOC440567 |
| 0.483895436 | stable | TBC1D3C   |
| 0.483895436 | stable | TTY3      |
| 0.483895436 | stable | NCBP1     |
| 0.483895436 | stable | LOC649945 |
| 0.483895436 | stable | LOC642411 |
| 0.483895436 | stable | C14ORF128 |
| 0.484332797 | stable | TDRD10    |
| 0.484423866 | stable | LIMA1     |
| 0.484423866 | stable | RINT1     |

DEG.infomation

|             |        |           |
|-------------|--------|-----------|
| 0.484423866 | stable | CSPP1     |
| 0.484423866 | stable | LOC646917 |
| 0.484464797 | stable | LOC646162 |
| 0.484464797 | stable | KIR2DS4   |
| 0.484464797 | stable | LOC643559 |
| 0.484464797 | stable | TMED7     |
| 0.484705057 | stable | LOC652856 |
| 0.484804058 | stable | ZNF467    |
| 0.484804058 | stable | EXOSC6    |
| 0.484804058 | stable | RAD18     |
| 0.485162687 | stable | SLN       |
| 0.485169535 | stable | LOC652647 |
| 0.485175605 | stable | LOC642759 |
| 0.485459923 | stable | RAB6B     |
| 0.485679484 | stable | ACBD4     |
| 0.4857648   | stable | LMBRD1    |
| 0.485767713 | stable | LOC643697 |
| 0.485767713 | stable | IAPP      |
| 0.485803864 | stable | TRIM16    |
| 0.485935198 | stable | LOC440895 |
| 0.485948833 | stable | LOC220429 |
| 0.486029751 | stable | PCDHA5    |
| 0.486065647 | stable | MCM3      |
| 0.48607067  | stable | LOC644157 |
| 0.486149866 | stable | ZYG11B    |
| 0.486149866 | stable | OR4S2     |
| 0.486177199 | stable | PNMA6A    |
| 0.486321687 | stable | DDHD1     |
| 0.486531606 | stable | PAH       |
| 0.486690001 | stable | LOC645966 |
| 0.48685929  | stable | FLJ33708  |
| 0.487077263 | stable | LOC645487 |
| 0.48717509  | stable | LOC645676 |
| 0.487190897 | stable | SLC38A9   |
| 0.487226195 | stable | LOC728081 |
| 0.487227874 | stable | LOC645441 |
| 0.487678743 | stable | ZNF326    |
| 0.487787435 | stable | HERPUD1   |
| 0.487801127 | stable | LOC644953 |
| 0.487853    | stable | KBTBD6    |
| 0.487858652 | stable | FLJ12355  |
| 0.48786248  | stable | EPHB2     |
| 0.487919133 | stable | FOXD4L1   |
| 0.487919133 | stable | LOC644828 |
| 0.488082592 | stable | LOC641994 |
| 0.488083003 | stable | TYK2      |
| 0.488083003 | stable | MEFV      |
| 0.488276063 | stable | FLJ41841  |
| 0.488276063 | stable | PCDHB11   |
| 0.488342716 | stable | LOC729486 |
| 0.488467608 | stable | RAX       |

## DEG.infomation

|             |        |               |
|-------------|--------|---------------|
| 0.488624011 | stable | DEFB1         |
| 0.488631808 | stable | LOC653673     |
| 0.488631808 | stable | HYAL3         |
| 0.488631808 | stable | RAB7L1        |
| 0.488686348 | stable | TTC4          |
| 0.489081356 | stable | LOC649937     |
| 0.489081356 | stable | SPEF1         |
| 0.489291854 | stable | LOC644679     |
| 0.48941927  | stable | GPR149        |
| 0.489585081 | stable | PKP1          |
| 0.489782313 | stable | LOC653899     |
| 0.489794522 | stable | POTE2         |
| 0.489798294 | stable | LOC652828     |
| 0.489807783 | stable | SMPD4         |
| 0.489811471 | stable | LOC652765     |
| 0.489811471 | stable | LOC646103     |
| 0.489811471 | stable | C1ORF180      |
| 0.489811471 | stable | LOC390595     |
| 0.489811471 | stable | FUS           |
| 0.489811471 | stable | LOC643950     |
| 0.489851008 | stable | SPRYD5        |
| 0.489856638 | stable | SYAP1         |
| 0.489856638 | stable | B3GALT5       |
| 0.48987585  | stable | FAM12B        |
| 0.489900978 | stable | SCTR          |
| 0.490091869 | stable | ZNF512B       |
| 0.490091869 | stable | LOC649159     |
| 0.490285371 | stable | LOC644580     |
| 0.490296425 | stable | PLEKHA7       |
| 0.490296425 | stable | SLC30A6       |
| 0.490296425 | stable | PCDHA13       |
| 0.490298146 | stable | SNRPD2        |
| 0.490417706 | stable | P2RY10        |
| 0.490511547 | stable | LOC440748     |
| 0.490511547 | stable | LOC645494     |
| 0.490635307 | stable | LOC283157     |
| 0.49065597  | stable | FBLN2         |
| 0.49076978  | stable | LOC649935     |
| 0.490898511 | stable | LOC652903     |
| 0.490898511 | stable | MAF1          |
| 0.491008133 | stable | SIGIRR        |
| 0.491187277 | stable | HSPA8         |
| 0.491381136 | stable | LOC642350     |
| 0.491381136 | stable | GLUD2         |
| 0.491438446 | stable | ERBB2         |
| 0.4917092   | stable | LOC644316     |
| 0.491797275 | stable | ZNF808        |
| 0.49180998  | stable | C19ORF21      |
| 0.49180998  | stable | DKFZP761O2018 |
| 0.491970299 | stable | LOC648044     |
| 0.491985131 | stable | OR51F2        |



## DEG.infomation

|             |        |           |
|-------------|--------|-----------|
| 0.492239643 | stable | C1ORF64   |
| 0.492239643 | stable | SPTBN5    |
| 0.492239643 | stable | FLJ34969  |
| 0.492406565 | stable | LOC643143 |
| 0.492461153 | stable | KIAA0947  |
| 0.492461153 | stable | TBC1D26   |
| 0.492556356 | stable | RPS12     |
| 0.49257348  | stable | LOC644779 |
| 0.492605551 | stable | LOC649088 |
| 0.492605551 | stable | LOC730357 |
| 0.492605551 | stable | LOC642452 |
| 0.492605551 | stable | TRIM46    |
| 0.492627909 | stable | LOC649133 |
| 0.492627909 | stable | LOC654244 |
| 0.492629309 | stable | KCNC1     |
| 0.492749217 | stable | ZNF473    |
| 0.492749217 | stable | OR6C1     |
| 0.492749217 | stable | OR2T11    |
| 0.49280481  | stable | LOC647873 |
| 0.493011069 | stable | ARMC7     |
| 0.493050083 | stable | GOLGA2L1  |
| 0.493197049 | stable | DNAH2     |
| 0.493488389 | stable | BRWD3     |
| 0.494273809 | stable | WDFY3     |
| 0.494483369 | stable | LOC643197 |
| 0.494521403 | stable | FAM18B2   |
| 0.494606458 | stable | VRK3      |
| 0.49462741  | stable | POLR2F    |
| 0.494648905 | stable | ZNF281    |
| 0.495110419 | stable | THG1L     |
| 0.495185639 | stable | BOK       |
| 0.495236747 | stable | LOC647888 |
| 0.495418631 | stable | SIT1      |
| 0.495444355 | stable | CER1      |
| 0.495444355 | stable | NEK11     |
| 0.495444355 | stable | CDH9      |
| 0.495444355 | stable | LOC440925 |
| 0.495531223 | stable | LRRC38    |
| 0.495574731 | stable | AVP       |
| 0.495582474 | stable | MORF4L2   |
| 0.495598781 | stable | FAM164C   |
| 0.495598781 | stable | LOC653242 |
| 0.495623147 | stable | ARL5B     |
| 0.495765131 | stable | LOC652663 |
| 0.49579186  | stable | WDR16     |
| 0.495800775 | stable | LOC158830 |
| 0.496012759 | stable | LOC388275 |
| 0.496196877 | stable | C20ORF71  |
| 0.496402674 | stable | FOXA2     |
| 0.496685934 | stable | LOC646628 |
| 0.496685934 | stable | NRG1      |

## DEG.infomation

|             |        |           |
|-------------|--------|-----------|
| 0.496689242 | stable | POLR2A    |
| 0.496689242 | stable | LOC390933 |
| 0.496964724 | stable | LOC646494 |
| 0.496996274 | stable | WDR21C    |
| 0.497005058 | stable | LOC643834 |
| 0.497011343 | stable | ASB9      |
| 0.497089963 | stable | LOC650410 |
| 0.497349055 | stable | ZNF284    |
| 0.497656309 | stable | SEC22C    |
| 0.497661868 | stable | LOC440334 |
| 0.497966359 | stable | SDK2      |
| 0.498011544 | stable | ZNF232    |
| 0.498036414 | stable | CYP4Z2P   |
| 0.498075424 | stable | LSP1      |
| 0.49812956  | stable | PCDH7     |
| 0.498408512 | stable | FLJ16734  |
| 0.498408512 | stable | SLC7A4    |
| 0.498870041 | stable | LOC441682 |
| 0.498997562 | stable | LOC389904 |
| 0.499024846 | stable | ALAS1     |
| 0.499024846 | stable | PPP1R2    |
| 0.499161274 | stable | LOC647176 |
| 0.499223441 | stable | LOC643912 |
| 0.499223572 | stable | LOC653481 |
| 0.499223572 | stable | RAB11FIP1 |
| 0.499223572 | stable | LOC649455 |
| 0.499359363 | stable | SLFN12L   |
| 0.499423338 | stable | CCRL1     |
| 0.499423338 | stable | LOC644646 |
| 0.499423338 | stable | ZNF93     |
| 0.499586517 | stable | LOC644539 |
| 0.49960355  | stable | LOC652468 |
| 0.499672565 | stable | DFNA5     |
| 0.499704133 | stable | FBXO11    |
| 0.499704133 | stable | LOC402670 |
| 0.499747116 | stable | LOC648907 |
| 0.500146867 | stable | KCNQ5     |
| 0.500146867 | stable | MAS1L     |
| 0.500182301 | stable | PPCDC     |
| 0.500399681 | stable | LOC642671 |
| 0.500532707 | stable | APOL2     |
| 0.500641552 | stable | LOC402693 |
| 0.500641552 | stable | LOC650553 |
| 0.500641552 | stable | LOC647461 |
| 0.500641552 | stable | ZNF592    |
| 0.500641552 | stable | LOC650098 |
| 0.500641552 | stable | CLEC2A    |
| 0.500711854 | stable | THSD7B    |
| 0.500913937 | stable | CHRNA10   |
| 0.500913937 | stable | BCL2A1    |
| 0.501100587 | stable | GBP7      |

## DEG.infomation

|             |        |           |
|-------------|--------|-----------|
| 0.501100587 | stable | SH3BP5L   |
| 0.501419496 | stable | IGFBP7    |
| 0.501419496 | stable | LOC646845 |
| 0.501473785 | stable | ANG       |
| 0.501636028 | stable | MRPL43    |
| 0.501821971 | stable | MAGEC2    |
| 0.501983307 | stable | C13ORF28  |
| 0.502037333 | stable | LOC439949 |
| 0.502037333 | stable | SLC35F3   |
| 0.502365981 | stable | C15ORF21  |
| 0.502365981 | stable | FAM53A    |
| 0.502416676 | stable | ACBD6     |
| 0.502525201 | stable | MRPL51    |
| 0.502525201 | stable | GJC2      |
| 0.502615965 | stable | C1ORF88   |
| 0.502615965 | stable | LOC727851 |
| 0.502691567 | stable | LOC645273 |
| 0.502711218 | stable | RAB25     |
| 0.502711218 | stable | CCDC17    |
| 0.502711218 | stable | UNK       |
| 0.502711218 | stable | OR10AD1   |
| 0.502711218 | stable | GPATC4    |
| 0.502711218 | stable | ATP11A    |
| 0.502719836 | stable | NTS       |
| 0.502719836 | stable | TACC3     |
| 0.502719836 | stable | PDE3A     |
| 0.502832433 | stable | LOC400986 |
| 0.503155363 | stable | LOC648167 |
| 0.503203653 | stable | LOC389394 |
| 0.503203653 | stable | TEX9      |
| 0.503204191 | stable | KRTAP27-1 |
| 0.503204191 | stable | LOC646262 |
| 0.50328868  | stable | LOC652522 |
| 0.50328868  | stable | NFATC3    |
| 0.50328868  | stable | TEX15     |
| 0.503524927 | stable | HTR7P     |
| 0.503741355 | stable | LOC647941 |
| 0.503851734 | stable | MIAT      |
| 0.50388419  | stable | FLJ16323  |
| 0.504074673 | stable | THEX1     |
| 0.504233403 | stable | COPB2     |
| 0.504310347 | stable | FOXD4L3   |
| 0.50436062  | stable | TM4SF5    |
| 0.504433928 | stable | TXNIP     |
| 0.504486868 | stable | OR51E2    |
| 0.504486868 | stable | GPRC5C    |
| 0.504598583 | stable | LOC646197 |
| 0.504615842 | stable | RNF167    |
| 0.504615842 | stable | RXFP3     |
| 0.504615842 | stable | AVPR1A    |
| 0.504615842 | stable | C14ORF119 |

## DEG.infomation

|             |        |           |
|-------------|--------|-----------|
| 0.504615842 | stable | LOC647868 |
| 0.504681075 | stable | ZNF490    |
| 0.504681075 | stable | GAGE8     |
| 0.504681075 | stable | GLIPR1L1  |
| 0.504798128 | stable | LOC390211 |
| 0.504801877 | stable | FIZ1      |
| 0.504801877 | stable | TMEM138   |
| 0.504804932 | stable | RBM23     |
| 0.504894771 | stable | OR4C6     |
| 0.504894771 | stable | LOC388476 |
| 0.505022141 | stable | MSH4      |
| 0.505022141 | stable | LOC650794 |
| 0.505078455 | stable | RTTN      |
| 0.505205949 | stable | LOC389599 |
| 0.505215696 | stable | SCAND2    |
| 0.505215696 | stable | LSS       |
| 0.505496767 | stable | FLNB      |
| 0.505597919 | stable | DRD2      |
| 0.505735739 | stable | KRT76     |
| 0.505767632 | stable | SNX7      |
| 0.505978486 | stable | ZNF677    |
| 0.505978486 | stable | LOC644635 |
| 0.505978486 | stable | PALMD     |
| 0.505978486 | stable | WIT-1     |
| 0.506050806 | stable | LOC728939 |
| 0.506050806 | stable | LOC646748 |
| 0.506050806 | stable | LOC651441 |
| 0.506050806 | stable | C14ORF48  |
| 0.506050806 | stable | LOC732162 |
| 0.506050806 | stable | QPCTL     |
| 0.506050806 | stable | MXD1      |
| 0.506321709 | stable | PHF15     |
| 0.506383995 | stable | CYP51A1   |
| 0.506387315 | stable | ALX3      |
| 0.506487037 | stable | ZNF117    |
| 0.506487037 | stable | FLJ25006  |
| 0.506487037 | stable | LOC729647 |
| 0.506504551 | stable | CDC2      |
| 0.506584353 | stable | TRIM15    |
| 0.506623899 | stable | HNF4A     |
| 0.506773014 | stable | LOC651561 |
| 0.506912094 | stable | SCNN1A    |
| 0.506922415 | stable | CA7       |
| 0.507167659 | stable | BTBD6     |
| 0.507167659 | stable | UBP1      |
| 0.507167659 | stable | SLC14A2   |
| 0.507167659 | stable | LOC284402 |
| 0.507258084 | stable | SPRR2A    |
| 0.507266763 | stable | LOC645708 |
| 0.507267626 | stable | SLC5A5    |
| 0.507295962 | stable | SNRPD3    |

## DEG.infomation

|             |        |           |
|-------------|--------|-----------|
| 0.507295962 | stable | SET       |
| 0.507441423 | stable | SCAF1     |
| 0.507567941 | stable | ROM1      |
| 0.507567941 | stable | C18ORF20  |
| 0.507606035 | stable | ATP2C2    |
| 0.507606035 | stable | SETD6     |
| 0.50818274  | stable | LOC653800 |
| 0.50818274  | stable | LOC652906 |
| 0.50818274  | stable | LSM2      |
| 0.50818274  | stable | LOC728219 |
| 0.50818274  | stable | RNASE13   |
| 0.50818274  | stable | LOC728919 |
| 0.508602802 | stable | LOC730862 |
| 0.508633188 | stable | ELA1      |
| 0.508657093 | stable | KRT80     |
| 0.509123306 | stable | LOC401447 |
| 0.509123306 | stable | LOC643149 |
| 0.509179862 | stable | LOC647344 |
| 0.509402112 | stable | EEF1A1    |
| 0.509402112 | stable | ING5      |
| 0.509508184 | stable | HSPB9     |
| 0.509568582 | stable | RPS23     |
| 0.509568582 | stable | ISG15     |
| 0.509807963 | stable | LOC643326 |
| 0.509807963 | stable | FSIP2     |
| 0.509837069 | stable | LYZL4     |
| 0.510001739 | stable | C6ORF58   |
| 0.510121051 | stable | NDUFS7    |
| 0.510377585 | stable | PTOV1     |
| 0.510556772 | stable | LOC400965 |
| 0.510556772 | stable | SLC12A7   |
| 0.510578741 | stable | JAK3      |
| 0.510656423 | stable | LOC647050 |
| 0.510656423 | stable | LOC728912 |
| 0.510712256 | stable | GDF7      |
| 0.510723562 | stable | LOC652389 |
| 0.510745926 | stable | LOC642711 |
| 0.510745926 | stable | SYTL5     |
| 0.510887221 | stable | ARHGAP6   |
| 0.510910505 | stable | GHSR      |
| 0.511023158 | stable | TAS2R14   |
| 0.511131373 | stable | LOC648981 |
| 0.51115066  | stable | FBXO22OS  |
| 0.51115066  | stable | PACRG     |
| 0.51115066  | stable | LOC727987 |
| 0.51115066  | stable | PSENE1    |
| 0.51115066  | stable | LOC654123 |
| 0.51115066  | stable | DRP2      |
| 0.51115066  | stable | ECSIT     |
| 0.51115066  | stable | TMEM130   |
| 0.511240874 | stable | LOC649540 |

## DEG.infomation

|             |        |           |
|-------------|--------|-----------|
| 0.511332743 | stable | SERHL2    |
| 0.511332743 | stable | LOC649851 |
| 0.511332743 | stable | PAPD1     |
| 0.511383317 | stable | LOC650869 |
| 0.511383317 | stable | LOC643090 |
| 0.511426916 | stable | LOC646090 |
| 0.511650579 | stable | LOC644921 |
| 0.511650579 | stable | KISS1R    |
| 0.511663977 | stable | HSD17B7P2 |
| 0.511688365 | stable | LOC653657 |
| 0.511688365 | stable | LOC653272 |
| 0.51174003  | stable | LOC121981 |
| 0.51174003  | stable | LOC644305 |
| 0.51174003  | stable | TAAR5     |
| 0.511941961 | stable | LOC649305 |
| 0.512167962 | stable | C2CD3     |
| 0.512209414 | stable | LOC347292 |
| 0.512209414 | stable | LOC647783 |
| 0.512230194 | stable | NR2E3     |
| 0.51233562  | stable | IFP38     |
| 0.512404259 | stable | LOC651825 |
| 0.512404259 | stable | LOC652730 |
| 0.512484574 | stable | LOC650114 |
| 0.512563653 | stable | LOC644548 |
| 0.512587626 | stable | PRKG2     |
| 0.512588668 | stable | FLJ25404  |
| 0.512820471 | stable | LOC642144 |
| 0.512896617 | stable | SUV39H2   |
| 0.513031877 | stable | FAH       |
| 0.513033514 | stable | MDGA2     |
| 0.513045204 | stable | ZNF785    |
| 0.513053515 | stable | OR8A1     |
| 0.513053515 | stable | GHRH      |
| 0.513053515 | stable | LOC652781 |
| 0.513420102 | stable | KRTAP9-5  |
| 0.513722038 | stable | LOC389286 |
| 0.513783329 | stable | OR10K2    |
| 0.51384957  | stable | POLR1D    |
| 0.513951463 | stable | PLCXD3    |
| 0.514270943 | stable | LRRC27    |
| 0.514391266 | stable | LOC645724 |
| 0.514490154 | stable | PIK3CB    |
| 0.514629545 | stable | LOC653425 |
| 0.514728634 | stable | LOC646665 |
| 0.514818383 | stable | ENPP6     |
| 0.514972014 | stable | RUVBL1    |
| 0.514972014 | stable | TBC1D9B   |
| 0.514972014 | stable | LHX8      |
| 0.515104184 | stable | OR8K5     |
| 0.515104184 | stable | LOC652255 |
| 0.515104184 | stable | LOC645385 |

## DEG.infomation

|             |        |           |
|-------------|--------|-----------|
| 0.515371958 | stable | DNAJB8    |
| 0.515371958 | stable | LOC653601 |
| 0.515409013 | stable | GAD1      |
| 0.515423063 | stable | PTPLA     |
| 0.515423063 | stable | HDX       |
| 0.51545901  | stable | OR5L1     |
| 0.515493171 | stable | LOC651468 |
| 0.515493755 | stable | CRB1      |
| 0.515650402 | stable | LOC645799 |
| 0.515650402 | stable | MGC40499  |
| 0.515704212 | stable | SYN1      |
| 0.515744011 | stable | LOC641733 |
| 0.515785396 | stable | LOC645651 |
| 0.515802108 | stable | C2ORF48   |
| 0.515802108 | stable | BMPR1B    |
| 0.515982757 | stable | C1ORF220  |
| 0.516120068 | stable | PRR8      |
| 0.516235401 | stable | LOC92017  |
| 0.516352941 | stable | KIF2B     |
| 0.516364747 | stable | OR5H6     |
| 0.516520046 | stable | LRRC4C    |
| 0.516552415 | stable | LOC653104 |
| 0.516601203 | stable | LOC441257 |
| 0.516960857 | stable | KCNN1     |
| 0.516960857 | stable | ENOPH1    |
| 0.517114032 | stable | LOC647707 |
| 0.517139732 | stable | SESN1     |
| 0.517189405 | stable | LOC392395 |
| 0.517228261 | stable | LOC641950 |
| 0.517438955 | stable | TACSTD2   |
| 0.517829415 | stable | SNAG1     |
| 0.517833787 | stable | NKTR      |
| 0.517885688 | stable | ARFIP2    |
| 0.517898701 | stable | LOC652618 |
| 0.517910796 | stable | C20ORF106 |
| 0.518168778 | stable | ERGIC3    |
| 0.518168778 | stable | C20ORF117 |
| 0.518168778 | stable | OTOA      |
| 0.518189789 | stable | DDX46     |
| 0.518303436 | stable | DEADC1    |
| 0.518303436 | stable | SLC6A20   |
| 0.51862211  | stable | C3ORF24   |
| 0.518714289 | stable | LOC286187 |
| 0.518966576 | stable | TRPM8     |
| 0.51899739  | stable | AURKC     |
| 0.519089473 | stable | GPR75     |
| 0.519089564 | stable | PI4KAP2   |
| 0.519089564 | stable | PNMA2     |
| 0.519089564 | stable | LOC401351 |
| 0.519089564 | stable | SLC8A3    |
| 0.519089564 | stable | UGT1A7    |

## DEG.infomation

|             |        |           |
|-------------|--------|-----------|
| 0.519118536 | stable | CLK2P     |
| 0.519118536 | stable | CACNG3    |
| 0.519120023 | stable | C2ORF21   |
| 0.519220655 | stable | LOC643272 |
| 0.519284389 | stable | ATP6V1B1  |
| 0.519537597 | stable | DDX41     |
| 0.51955679  | stable | OR10X1    |
| 0.51955679  | stable | LOC652790 |
| 0.51955679  | stable | LOC728340 |
| 0.519584975 | stable | TRAF7     |
| 0.519692226 | stable | MATN4     |
| 0.519878421 | stable | ERLIN1    |
| 0.519891594 | stable | TTC28     |
| 0.519891594 | stable | LOC647391 |
| 0.519891594 | stable | GJB4      |
| 0.519891594 | stable | IGFN1     |
| 0.519891594 | stable | ABHD12B   |
| 0.519891594 | stable | PPP1R12B  |
| 0.519891594 | stable | LOC646897 |
| 0.519891594 | stable | LOC652685 |
| 0.520323206 | stable | LOC649327 |
| 0.520323206 | stable | ERAP2     |
| 0.520323206 | stable | LOC644131 |
| 0.520323206 | stable | LOC643623 |
| 0.520323206 | stable | LOC649497 |
| 0.520347639 | stable | LOC652860 |
| 0.520520168 | stable | TDRD5     |
| 0.520520168 | stable | CDRT15P   |
| 0.520682577 | stable | LOC283553 |
| 0.520712734 | stable | ZNF182    |
| 0.520777425 | stable | NLRP2     |
| 0.520796588 | stable | LOC388022 |
| 0.520900205 | stable | EIF2B2    |
| 0.521284126 | stable | LOC642149 |
| 0.521284126 | stable | ZFYVE20   |
| 0.521361142 | stable | LOC554235 |
| 0.521384397 | stable | CDKL5     |
| 0.521400372 | stable | H2BFXP    |
| 0.521519905 | stable | KIAA2013  |
| 0.521528757 | stable | FRMPD3    |
| 0.521632509 | stable | LARP1     |
| 0.521632509 | stable | LOC654106 |
| 0.521760068 | stable | LOC647983 |
| 0.521760068 | stable | LOC650030 |
| 0.522125219 | stable | GSDM1     |
| 0.522125219 | stable | OTOL1     |
| 0.522125219 | stable | LOC646303 |
| 0.522125219 | stable | LDHAL6B   |
| 0.522163007 | stable | LOC283874 |
| 0.522416549 | stable | HHIPL2    |
| 0.522522929 | stable | LOC731548 |



## DEG.infomation

|             |        |           |
|-------------|--------|-----------|
| 0.522522929 | stable | LOC645284 |
| 0.52257581  | stable | LOC652235 |
| 0.522584917 | stable | GTF2IP1   |
| 0.522609961 | stable | LOC342892 |
| 0.522609961 | stable | P2RX7     |
| 0.522609961 | stable | SAC       |
| 0.522644227 | stable | LOC439951 |
| 0.522653638 | stable | LOC648496 |
| 0.522816759 | stable | ADAM5P    |
| 0.522816759 | stable | NKD1      |
| 0.522816759 | stable | SEMA3B    |
| 0.522816759 | stable | LOC347475 |
| 0.522817324 | stable | RIOK1     |
| 0.522817324 | stable | LOC652557 |
| 0.522817324 | stable | GPRC6A    |
| 0.522817324 | stable | LOC650733 |
| 0.522817324 | stable | PVRL1     |
| 0.523024313 | stable | ANKRD45   |
| 0.523267644 | stable | PAX2      |
| 0.523267644 | stable | LOC652697 |
| 0.523267644 | stable | GRHL2     |
| 0.523267644 | stable | EVX2      |
| 0.523267644 | stable | OCLM      |
| 0.523267644 | stable | OR5AC2    |
| 0.523304918 | stable | DYRK1A    |
| 0.523417277 | stable | SRP54     |
| 0.523417277 | stable | BTAF1     |
| 0.523417277 | stable | FANK1     |
| 0.523528575 | stable | HUWE1     |
| 0.523568891 | stable | MEX3B     |
| 0.523616037 | stable | LOC646484 |
| 0.523616037 | stable | LOC647718 |
| 0.523616037 | stable | LOC649563 |
| 0.523616037 | stable | C6ORF154  |
| 0.523616037 | stable | GLS2      |
| 0.523797428 | stable | VN1R5     |
| 0.523828192 | stable | TLX3      |
| 0.523828192 | stable | LOC728608 |
| 0.523910732 | stable | C13ORF39  |
| 0.524036665 | stable | LOC643007 |
| 0.524036665 | stable | LOC642374 |
| 0.524036665 | stable | LOC651169 |
| 0.524052736 | stable | KAAG1     |
| 0.524052736 | stable | LOC392489 |
| 0.524141936 | stable | LOC653353 |
| 0.524313107 | stable | DR1       |
| 0.524313107 | stable | ANKFY1    |
| 0.524362445 | stable | LOC652451 |
| 0.524561158 | stable | PEA15     |
| 0.524638662 | stable | TIMM22    |
| 0.524701784 | stable | LOC391165 |

## DEG.infomation

|             |        |           |
|-------------|--------|-----------|
| 0.52473502  | stable | CBLC      |
| 0.524957958 | stable | HEATR5B   |
| 0.524957958 | stable | IFI44     |
| 0.525132895 | stable | LOC642369 |
| 0.525247888 | stable | STX6      |
| 0.525359811 | stable | LOC644749 |
| 0.525359811 | stable | FLJ38377  |
| 0.525359811 | stable | ATP13A4   |
| 0.525359811 | stable | MLF1      |
| 0.525404864 | stable | LOC646803 |
| 0.525404864 | stable | KLF16     |
| 0.525643316 | stable | DGKB      |
| 0.525682547 | stable | PAX8      |
| 0.525682547 | stable | LRRC45    |
| 0.525682547 | stable | C9ORF43   |
| 0.525682547 | stable | LOC654159 |
| 0.525811881 | stable | LOC641947 |
| 0.525848368 | stable | LOC645871 |
| 0.525848368 | stable | AOF1      |
| 0.52601011  | stable | GABRR1    |
| 0.526022467 | stable | LOC729269 |
| 0.526062046 | stable | LOC654092 |
| 0.52607236  | stable | HMGNA4    |
| 0.526302326 | stable | ACRC      |
| 0.526480836 | stable | LOC647366 |
| 0.526685646 | stable | LOC255649 |
| 0.526721872 | stable | CMPK1     |
| 0.526838329 | stable | LOC650557 |
| 0.526838329 | stable | GJB6      |
| 0.527001492 | stable | WDR86     |
| 0.527008162 | stable | LOC648271 |
| 0.527023427 | stable | FAM90A10  |
| 0.527023427 | stable | CD1E      |
| 0.527055715 | stable | C8ORF34   |
| 0.527094609 | stable | OR1F2P    |
| 0.527335332 | stable | UNCX      |
| 0.527480008 | stable | LOC651864 |
| 0.527487485 | stable | EXT1      |
| 0.527509933 | stable | TFB2M     |
| 0.527822319 | stable | HIST1H4L  |
| 0.527910199 | stable | LOC440795 |
| 0.528049274 | stable | KCNK9     |
| 0.528057984 | stable | C10ORF114 |
| 0.528120461 | stable | SDC4P     |
| 0.52815798  | stable | LOC651091 |
| 0.528187654 | stable | AP1GBP1   |
| 0.528187654 | stable | ATP8B2    |
| 0.528354893 | stable | LOC652238 |
| 0.528444739 | stable | LOC642153 |
| 0.528444739 | stable | FKSG49    |
| 0.528444739 | stable | NRBP1     |

## DEG.infomation

|             |        |           |
|-------------|--------|-----------|
| 0.528496549 | stable | LOC440291 |
| 0.528524073 | stable | LOC441548 |
| 0.52855638  | stable | LOC642781 |
| 0.528747252 | stable | CHD4      |
| 0.528752577 | stable | FAM20A    |
| 0.528752577 | stable | SCRT2     |
| 0.52896339  | stable | HLA-DQB2  |
| 0.52896339  | stable | LOC644680 |
| 0.52896339  | stable | VPREB3    |
| 0.529003443 | stable | LOC653149 |
| 0.529158341 | stable | LOC644666 |
| 0.529158341 | stable | C14ORF169 |
| 0.529235488 | stable | LOC387885 |
| 0.529235488 | stable | LOC648790 |
| 0.529476295 | stable | MEX3D     |
| 0.529476295 | stable | LOC283104 |
| 0.529597622 | stable | LOC646796 |
| 0.529597622 | stable | LOC619207 |
| 0.529664649 | stable | ZNF784    |
| 0.529675915 | stable | NXPH2     |
| 0.529845803 | stable | LOC255130 |
| 0.529846973 | stable | C9ORF140  |
| 0.529846973 | stable | C3ORF10   |
| 0.529846973 | stable | VWA2      |
| 0.529953111 | stable | HS6ST1    |
| 0.529953111 | stable | RSPO3     |
| 0.530006855 | stable | HCG4P6    |
| 0.530006855 | stable | HUNK      |
| 0.530013821 | stable | HTR1F     |
| 0.530013821 | stable | LOC728117 |
| 0.530013821 | stable | CADM4     |
| 0.530050374 | stable | ABTB2     |
| 0.530141399 | stable | LOC653735 |
| 0.530141399 | stable | LOC286260 |
| 0.530141399 | stable | LOC652510 |
| 0.530141399 | stable | NFE2L2    |
| 0.530266875 | stable | FZR1      |
| 0.530384648 | stable | LOC643918 |
| 0.530510657 | stable | KRTAP4-2  |
| 0.530628116 | stable | LOC650107 |
| 0.53067946  | stable | SLC6A13   |
| 0.530720725 | stable | LOC652787 |
| 0.530835061 | stable | LOC644717 |
| 0.530990089 | stable | IFI6      |
| 0.531089144 | stable | USP40     |
| 0.531089144 | stable | APOBEC3H  |
| 0.531097021 | stable | LOC650412 |
| 0.531097021 | stable | LOC643990 |
| 0.531097021 | stable | MLLT4     |
| 0.531141215 | stable | LOC732424 |
| 0.531141215 | stable | SCAMP4    |

## DEG.infomation

|             |        |           |
|-------------|--------|-----------|
| 0.531141215 | stable | CLEC3A    |
| 0.531141215 | stable | LOC652022 |
| 0.531141215 | stable | CYP3A4    |
| 0.531240039 | stable | PSMB10    |
| 0.531249187 | stable | POMGNT1   |
| 0.531249187 | stable | TRPM7     |
| 0.531285768 | stable | NUTF2     |
| 0.531472819 | stable | TG        |
| 0.531500256 | stable | LOC648080 |
| 0.531581146 | stable | ACP2      |
| 0.531581146 | stable | FAM176B   |
| 0.531581146 | stable | TAS2R4    |
| 0.531581146 | stable | AGRP      |
| 0.531604852 | stable | C1ORF126  |
| 0.531604852 | stable | KIAA1632  |
| 0.531604852 | stable | PRDX2     |
| 0.531623898 | stable | LOC388242 |
| 0.531623898 | stable | LBXCOR1   |
| 0.531629037 | stable | HKDC1     |
| 0.531643023 | stable | LOC650716 |
| 0.531753489 | stable | SGK2      |
| 0.53208029  | stable | PCDHGC5   |
| 0.532177263 | stable | LOC649813 |
| 0.532446327 | stable | S100A5    |
| 0.532547949 | stable | EFCAB3    |
| 0.532594836 | stable | CPS1      |
| 0.53272795  | stable | RPTN      |
| 0.53272795  | stable | CFHR5     |
| 0.53272795  | stable | OR2H1     |
| 0.53272795  | stable | LOC441546 |
| 0.532797044 | stable | AMAC1L1   |
| 0.5328053   | stable | LOC644325 |
| 0.5328053   | stable | ENDOD1    |
| 0.532973898 | stable | ATP8B3    |
| 0.532980262 | stable | ZMAT2     |
| 0.532980262 | stable | MUC7      |
| 0.532980262 | stable | C13ORF27  |
| 0.533112258 | stable | LOC401242 |
| 0.533196977 | stable | CD70      |
| 0.533255826 | stable | OR13H1    |
| 0.533255826 | stable | LOC642637 |
| 0.533255826 | stable | LOC731408 |
| 0.533255826 | stable | LOC645291 |
| 0.533426226 | stable | PPIL2     |
| 0.533426226 | stable | LOC728747 |
| 0.533426226 | stable | LOC651167 |
| 0.533426226 | stable | DEFB124   |
| 0.533426226 | stable | RGPD4     |
| 0.533426226 | stable | VAMP2     |
| 0.533426226 | stable | PCDHA1    |
| 0.533520568 | stable | RSPH1     |

## DEG.infomation

|             |        |               |
|-------------|--------|---------------|
| 0.533520568 | stable | XYLB          |
| 0.533564474 | stable | RHOXF2B       |
| 0.533622988 | stable | C1ORF57       |
| 0.533722346 | stable | LOC643965     |
| 0.533722346 | stable | LOC642338     |
| 0.533730558 | stable | LOC727866     |
| 0.533906252 | stable | CLLU1OS       |
| 0.533966615 | stable | SIN3B         |
| 0.533966615 | stable | MAGEA3        |
| 0.534215582 | stable | ATP1A3        |
| 0.534252115 | stable | EPB41L4B      |
| 0.53428369  | stable | DKFZP43410714 |
| 0.534345492 | stable | C2ORF175      |
| 0.534377498 | stable | LOC647348     |
| 0.534390527 | stable | HNRPLL        |
| 0.534416832 | stable | HMGCS1        |
| 0.534544739 | stable | GPR37         |
| 0.534705054 | stable | HBQ1          |
| 0.534804183 | stable | LOC649162     |
| 0.534804183 | stable | NBPF11        |
| 0.534804183 | stable | LOC646804     |
| 0.534804183 | stable | OR11H1        |
| 0.534804183 | stable | TRPA1         |
| 0.534818741 | stable | C3ORF44       |
| 0.534818741 | stable | OR5AU1        |
| 0.534890373 | stable | LOC647283     |
| 0.535065551 | stable | PSMF1         |
| 0.535067018 | stable | LOC645811     |
| 0.535161798 | stable | LOC646350     |
| 0.535217486 | stable | LOC441795     |
| 0.535217486 | stable | SMARCAD1      |
| 0.535217486 | stable | CLEC12B       |
| 0.535549165 | stable | LOC641875     |
| 0.53583064  | stable | LOC646098     |
| 0.53583064  | stable | LOC652821     |
| 0.536496125 | stable | LOC90113      |
| 0.536520827 | stable | LOC441759     |
| 0.536520827 | stable | OR2T34        |
| 0.536567354 | stable | CCDC34        |
| 0.536567354 | stable | FGF23         |
| 0.536601243 | stable | VMD2L3        |
| 0.536666601 | stable | LOC729408     |
| 0.536690237 | stable | THAP11        |
| 0.536933517 | stable | SYNGR1        |
| 0.536964958 | stable | ENPP7         |
| 0.536970161 | stable | TCL1A         |
| 0.536998181 | stable | GRIN2A        |
| 0.536998181 | stable | CRABP1        |
| 0.537068549 | stable | LOC649857     |
| 0.537086673 | stable | UNC5A         |
| 0.537122473 | stable | LOC644348     |

## DEG.infomation

|             |        |           |
|-------------|--------|-----------|
| 0.537122473 | stable | LOC402635 |
| 0.537122473 | stable | ACTL7A    |
| 0.537237528 | stable | ZNF805    |
| 0.537237528 | stable | LOC646033 |
| 0.537237528 | stable | LOC644827 |
| 0.53730241  | stable | RAPGEF4   |
| 0.537478078 | stable | C6ORF12   |
| 0.537478078 | stable | TFAP2E    |
| 0.537575645 | stable | MGMT      |
| 0.537582684 | stable | LOC647359 |
| 0.537582684 | stable | LOC645293 |
| 0.53760259  | stable | CYP21A2   |
| 0.537782592 | stable | LOC139116 |
| 0.537888847 | stable | ZNF19     |
| 0.53800839  | stable | GREB1     |
| 0.538179947 | stable | LOC650698 |
| 0.538179947 | stable | HIST1H4D  |
| 0.538255026 | stable | DNAJC7    |
| 0.538255026 | stable | SGPP1     |
| 0.538255026 | stable | C9ORF29   |
| 0.53828223  | stable | ZBTB24    |
| 0.53828223  | stable | TRPV4     |
| 0.53828223  | stable | LOC645349 |
| 0.538314058 | stable | LOC440337 |
| 0.53833935  | stable | GIPC2     |
| 0.538559257 | stable | LOC388621 |
| 0.538559257 | stable | LOC387826 |
| 0.538648021 | stable | KRTAP4-1  |
| 0.538652459 | stable | LOC643882 |
| 0.538916305 | stable | OR10G4    |
| 0.538916305 | stable | COX18     |
| 0.539190352 | stable | LOC646908 |
| 0.539431427 | stable | RGL2      |
| 0.539481835 | stable | C6ORF79   |
| 0.539601855 | stable | SCN7A     |
| 0.53965302  | stable | LOC284801 |
| 0.539700332 | stable | CYORF14   |
| 0.53994818  | stable | FNDC7     |
| 0.539964142 | stable | H1F0      |
| 0.539964142 | stable | TTC21B    |
| 0.539964142 | stable | LOC644814 |
| 0.539964142 | stable | WIPF1     |
| 0.539964142 | stable | LOC648064 |
| 0.539964142 | stable | TAPBP     |
| 0.540017289 | stable | OTOF      |
| 0.54016939  | stable | HIST3H3   |
| 0.540183607 | stable | LOC441126 |
| 0.540204439 | stable | USP42     |
| 0.540204439 | stable | LOC653123 |
| 0.540397292 | stable | KRT12     |
| 0.540441052 | stable | FLJ22269  |

DEG.infomation

|             |        |           |
|-------------|--------|-----------|
| 0.540511273 | stable | CCNB2     |
| 0.540556138 | stable | ATG4A     |
| 0.540746537 | stable | LOC643580 |
| 0.540985447 | stable | KCNN2     |
| 0.541007152 | stable | SLITRK5   |
| 0.541021551 | stable | FLJ44881  |
| 0.541095691 | stable | LOC649812 |
| 0.541095691 | stable | GPSN2     |
| 0.541095691 | stable | DCC       |
| 0.541095691 | stable | ZNF828    |
| 0.541255451 | stable | MRM1      |
| 0.541261196 | stable | LOC645304 |
| 0.541408223 | stable | LY9       |
| 0.541515033 | stable | LOC642528 |
| 0.541515033 | stable | LOC653165 |
| 0.541587162 | stable | THAP7     |
| 0.541587162 | stable | HOMEZ     |
| 0.541998612 | stable | KCNH7     |
| 0.542069692 | stable | TMEFF1    |
| 0.542069692 | stable | TNR       |
| 0.542069692 | stable | C3ORF56   |
| 0.542069692 | stable | FLJ45202  |
| 0.542074888 | stable | OR4D5     |
| 0.542190768 | stable | SULT1E1   |
| 0.542344775 | stable | ORC1L     |
| 0.542359174 | stable | SPANXN1   |
| 0.542434115 | stable | PAK7      |
| 0.542600767 | stable | CUTC      |
| 0.542600767 | stable | LOC653539 |
| 0.542600767 | stable | LOC651769 |
| 0.542752906 | stable | PRICKLE3  |
| 0.542752906 | stable | DCDC1     |
| 0.542752906 | stable | LOC651044 |
| 0.542754927 | stable | CRTAM     |
| 0.542819456 | stable | LOC648066 |
| 0.543214358 | stable | LOC652274 |
| 0.543214358 | stable | LOC648763 |
| 0.543250898 | stable | LOC649362 |
| 0.54332015  | stable | RRAS2     |
| 0.54332015  | stable | KPTN      |
| 0.543454884 | stable | LOC644978 |
| 0.543804381 | stable | DGKG      |
| 0.54381059  | stable | VANGL1    |
| 0.54381059  | stable | LOC648966 |
| 0.544168841 | stable | MED9      |
| 0.544201067 | stable | RBMX1B    |
| 0.544437575 | stable | ZNF333    |
| 0.544508128 | stable | LOC644267 |
| 0.544669007 | stable | PHACTR3   |
| 0.544672688 | stable | LOC645099 |
| 0.544911918 | stable | LOC728004 |

DEG.infomation

|             |        |           |
|-------------|--------|-----------|
| 0.544911918 | stable | SIKE      |
| 0.545007318 | stable | CTLA4     |
| 0.545272052 | stable | LOC645956 |
| 0.545272251 | stable | ST18      |
| 0.545272251 | stable | TMEM75    |
| 0.545458481 | stable | QRSL1     |
| 0.545458481 | stable | POLQ      |
| 0.545524593 | stable | BACE1     |
| 0.54565412  | stable | LOC652070 |
| 0.545712641 | stable | UBE2S     |
| 0.545755086 | stable | ADRA2B    |
| 0.546071857 | stable | LOC649784 |
| 0.546233342 | stable | FLJ39660  |
| 0.546233342 | stable | FAM90A12  |
| 0.546308071 | stable | LOC646719 |
| 0.546340357 | stable | LIPL2     |
| 0.546398092 | stable | LOC731640 |
| 0.54640221  | stable | LOC652579 |
| 0.546435041 | stable | POLR1B    |
| 0.54653546  | stable | LY75      |
| 0.546549256 | stable | TNN       |
| 0.546560526 | stable | LOC393076 |
| 0.546571675 | stable | LOC284964 |
| 0.546579973 | stable | LOC643237 |
| 0.546676912 | stable | LOC647485 |
| 0.546715319 | stable | FAM10A6   |
| 0.546715319 | stable | LOC644554 |
| 0.546982409 | stable | OR4K14    |
| 0.547022993 | stable | PLXDC1    |
| 0.547022993 | stable | SNORD48   |
| 0.547022993 | stable | LOC387895 |
| 0.547022993 | stable | ANRIL     |
| 0.547022993 | stable | ATIC      |
| 0.547022993 | stable | PPP1R2P9  |
| 0.547022993 | stable | ZNF474    |
| 0.547022993 | stable | HAT1      |
| 0.547022993 | stable | KLF7      |
| 0.547022993 | stable | LOC732150 |
| 0.547022993 | stable | PLEKHA9   |
| 0.547022993 | stable | DAP       |
| 0.547131837 | stable | GPR151    |
| 0.547131837 | stable | TMC2      |
| 0.547131837 | stable | FLJ41766  |
| 0.54728695  | stable | LOC649217 |
| 0.54728695  | stable | FAM181A   |
| 0.54728695  | stable | XCR1      |
| 0.54728695  | stable | OR4B1     |
| 0.54742106  | stable | LPAL2     |
| 0.54742106  | stable | ARMC5     |
| 0.547513931 | stable | LOC648403 |
| 0.547714159 | stable | FLJ46154  |



## DEG.infomation

|             |        |           |
|-------------|--------|-----------|
| 0.547720522 | stable | LOC440105 |
| 0.547737889 | stable | PCDHGA4   |
| 0.547802014 | stable | ZNF660    |
| 0.547843769 | stable | ZNF396    |
| 0.547947078 | stable | MGAT3     |
| 0.547947078 | stable | ALDH1L1   |
| 0.548013868 | stable | ZNF542    |
| 0.548013868 | stable | LOC644058 |
| 0.548013868 | stable | GSG2      |
| 0.548013868 | stable | AGPS      |
| 0.548013868 | stable | SART3     |
| 0.548013868 | stable | AMOTL1    |
| 0.548176475 | stable | LOC653206 |
| 0.548176475 | stable | AMAC1L2   |
| 0.548176475 | stable | C19ORF26  |
| 0.548246471 | stable | TBC1D10A  |
| 0.548299115 | stable | ALS2CR14  |
| 0.548369354 | stable | LOC646740 |
| 0.548369354 | stable | LOC402096 |
| 0.548401236 | stable | KIAA1862  |
| 0.548401682 | stable | PFKL      |
| 0.548401682 | stable | LOC400499 |
| 0.548548353 | stable | AIM1L     |
| 0.548548353 | stable | TRPT1     |
| 0.548548353 | stable | LOC642576 |
| 0.548634845 | stable | SMAD6     |
| 0.548851978 | stable | CXCL5     |
| 0.548893015 | stable | CYP4F12   |
| 0.548958194 | stable | RANGRF    |
| 0.54900804  | stable | LOC644682 |
| 0.54900804  | stable | FMO6P     |
| 0.549042725 | stable | IL20RB    |
| 0.549104084 | stable | LOC645663 |
| 0.549430287 | stable | WDR3      |
| 0.549465263 | stable | LOC647247 |
| 0.549465263 | stable | ASTN2     |
| 0.549465263 | stable | FAM14B    |
| 0.549465263 | stable | LOC400696 |
| 0.549563905 | stable | SCD5      |
| 0.549584157 | stable | LOC650155 |
| 0.549605341 | stable | OR2B3P    |
| 0.549717623 | stable | LOC642684 |
| 0.549965373 | stable | PRB3      |
| 0.54999101  | stable | DHODH     |
| 0.54999101  | stable | RGS9      |
| 0.54999101  | stable | KSR2      |
| 0.550191414 | stable | NUDT16    |
| 0.550227173 | stable | RHEBL1    |
| 0.550325857 | stable | HPD       |
| 0.550388644 | stable | LOC652179 |
| 0.55047572  | stable | DDEF1     |

## DEG.infomation

|             |        |            |
|-------------|--------|------------|
| 0.550487131 | stable | LOC440104  |
| 0.550631539 | stable | EID3       |
| 0.550664147 | stable | ITGA4      |
| 0.550664147 | stable | ANKS6      |
| 0.550676683 | stable | HS3ST6     |
| 0.550735369 | stable | LOC645504  |
| 0.55081477  | stable | ZNF595     |
| 0.550980468 | stable | LOC644816  |
| 0.551111123 | stable | FCRL3      |
| 0.551119282 | stable | LOC651195  |
| 0.551119608 | stable | MAN1A1     |
| 0.551126233 | stable | GPR142     |
| 0.551193082 | stable | OR2A1      |
| 0.551193082 | stable | RGAG4      |
| 0.551432232 | stable | FAM90A6P   |
| 0.55144851  | stable | TNP2       |
| 0.551468865 | stable | FLJ25076   |
| 0.551562755 | stable | TMEM207    |
| 0.551562755 | stable | PDPR       |
| 0.551562755 | stable | LOC645458  |
| 0.551562755 | stable | TCEAL1     |
| 0.551562755 | stable | FGFBP3     |
| 0.551562755 | stable | TEKT5      |
| 0.55160934  | stable | ZNF553     |
| 0.55160934  | stable | OR13D1     |
| 0.55160934  | stable | C9ORF97    |
| 0.551730265 | stable | LOC646731  |
| 0.551797534 | stable | CFC1       |
| 0.551801554 | stable | DYDC2      |
| 0.551854201 | stable | S100A7L2   |
| 0.551916979 | stable | SLC23A1    |
| 0.552030533 | stable | LOC643423  |
| 0.552232508 | stable | MYF6       |
| 0.552232508 | stable | FAM22G     |
| 0.552232508 | stable | NR1H4      |
| 0.552424965 | stable | SLC35F5    |
| 0.552513613 | stable | ZNF449     |
| 0.552617886 | stable | UROC1      |
| 0.552617886 | stable | LOC642950  |
| 0.552617886 | stable | CABP5      |
| 0.552617886 | stable | LOC646096  |
| 0.552797714 | stable | CDH12P     |
| 0.552829561 | stable | OLFM3      |
| 0.552837424 | stable | FBLN1      |
| 0.552837424 | stable | PAGE4      |
| 0.552840498 | stable | RGPD5      |
| 0.552847022 | stable | HIST2H2AA3 |
| 0.552847022 | stable | PPP4R4     |
| 0.552874356 | stable | LOC136288  |
| 0.552874356 | stable | DLX3       |
| 0.553020357 | stable | LOC728504  |

DEG.infomation

|             |        |           |
|-------------|--------|-----------|
| 0.553020357 | stable | LOC645279 |
| 0.553063425 | stable | NDUFA4    |
| 0.553250311 | stable | TLL9      |
| 0.553250311 | stable | KLK15     |
| 0.553250311 | stable | LHFPL3    |
| 0.553250311 | stable | LOC649270 |
| 0.553250311 | stable | RBMY1F    |
| 0.553250311 | stable | BPESC1    |
| 0.553250311 | stable | MRPL28    |
| 0.553250311 | stable | HMGCR     |
| 0.553250311 | stable | AP1M2     |
| 0.553250311 | stable | AVIL      |
| 0.553293246 | stable | IQCB1     |
| 0.553293246 | stable | DNCL2A    |
| 0.553293246 | stable | DIO1      |
| 0.553293246 | stable | OTUD6B    |
| 0.55339632  | stable | LOC728403 |
| 0.553468757 | stable | LOC653115 |
| 0.553648294 | stable | LOC641929 |
| 0.553687037 | stable | LOC645172 |
| 0.553840885 | stable | KIAA1772  |
| 0.553898554 | stable | TAAR9     |
| 0.553898554 | stable | LOC642702 |
| 0.553993771 | stable | JDP2      |
| 0.554072588 | stable | ITGB8     |
| 0.554317841 | stable | C19ORF62  |
| 0.554725476 | stable | NPBWR1    |
| 0.554772284 | stable | SNAP91    |
| 0.554805398 | stable | TFR2      |
| 0.554989184 | stable | CCR10     |
| 0.555062275 | stable | KIF23     |
| 0.555194349 | stable | PLD4      |
| 0.555194349 | stable | LOC646933 |
| 0.555194349 | stable | GBX2      |
| 0.555200346 | stable | HCG22     |
| 0.555399892 | stable | LOC441282 |
| 0.555515912 | stable | COL11A2   |
| 0.555604503 | stable | ARGFX     |
| 0.555604503 | stable | LOC648600 |
| 0.555604503 | stable | KRT84     |
| 0.555616815 | stable | FAM7A2    |
| 0.555628949 | stable | LOC732416 |
| 0.555709816 | stable | FLJ44817  |
| 0.555713332 | stable | XRCC5     |
| 0.555763788 | stable | SULT1C2   |
| 0.555851489 | stable | LOC648364 |
| 0.555851489 | stable | NUP155    |
| 0.555874939 | stable | LRP6      |
| 0.555887098 | stable | COPS7A    |
| 0.556101731 | stable | OR10R2    |
| 0.556154162 | stable | LOC392215 |

## DEG.infomation

|             |        |           |
|-------------|--------|-----------|
| 0.556207454 | stable | TAGAP     |
| 0.556222015 | stable | SLC6A4    |
| 0.556222015 | stable | LOC651777 |
| 0.556222015 | stable | B3GALT1   |
| 0.556222015 | stable | PLXNB3    |
| 0.556222015 | stable | LOC391276 |
| 0.556222015 | stable | LOC651268 |
| 0.556393552 | stable | VCL       |
| 0.556418538 | stable | C4ORF37   |
| 0.556418538 | stable | CLECL1    |
| 0.556547796 | stable | LOC642265 |
| 0.556547796 | stable | HILS1     |
| 0.556604646 | stable | APBA2     |
| 0.556711944 | stable | FBXO41    |
| 0.556711944 | stable | CLGN      |
| 0.556711944 | stable | CXORF58   |
| 0.556863291 | stable | ERAF      |
| 0.556863291 | stable | DMXL1     |
| 0.557138488 | stable | LINS1     |
| 0.557207405 | stable | CAMKK1    |
| 0.55723888  | stable | LOC647336 |
| 0.557384321 | stable | RPS25     |
| 0.557810727 | stable | LOC645194 |
| 0.557901678 | stable | LOC651381 |
| 0.558008099 | stable | LOC645879 |
| 0.558008099 | stable | ADNP2     |
| 0.558112263 | stable | LOC652160 |
| 0.558155995 | stable | UGT1A9    |
| 0.55886166  | stable | ATP2A3    |
| 0.558862349 | stable | ECHDC3    |
| 0.558862349 | stable | SPCS1     |
| 0.558867131 | stable | NPY5R     |
| 0.558949088 | stable | LOC126520 |
| 0.558968931 | stable | LOC652405 |
| 0.559034339 | stable | C16ORF55  |
| 0.55909277  | stable | LOC646855 |
| 0.559109192 | stable | LOC284701 |
| 0.559125392 | stable | SHD       |
| 0.559125392 | stable | KAT5      |
| 0.559125392 | stable | LOC650475 |
| 0.559226677 | stable | PIK3C3    |
| 0.559276599 | stable | KCTD7     |
| 0.559566302 | stable | LOC730076 |
| 0.559880188 | stable | SST       |
| 0.559880188 | stable | GLYAT     |
| 0.560096863 | stable | MGC24103  |
| 0.560096863 | stable | LOC644057 |
| 0.560230357 | stable | OR52I1    |
| 0.560384237 | stable | LOC645333 |
| 0.560420963 | stable | LOC649092 |
| 0.560477919 | stable | RPA4      |

## DEG.infomation

|             |        |           |
|-------------|--------|-----------|
| 0.560477919 | stable | LOC653249 |
| 0.560549966 | stable | LOC641908 |
| 0.560840228 | stable | LOC651031 |
| 0.560888843 | stable | SMA4      |
| 0.560910882 | stable | LOC648963 |
| 0.560937704 | stable | LOC645659 |
| 0.560957952 | stable | GYPA      |
| 0.560976979 | stable | RPE       |
| 0.560976979 | stable | OR8K3     |
| 0.560976979 | stable | LOC653073 |
| 0.560976979 | stable | DHRS1     |
| 0.561092141 | stable | LOC645179 |
| 0.561092141 | stable | LOC442057 |
| 0.561152007 | stable | LOC401498 |
| 0.561288567 | stable | DEC1      |
| 0.561306623 | stable | TSPAN33   |
| 0.561345539 | stable | LOC731898 |
| 0.561378416 | stable | MICAL3    |
| 0.561589765 | stable | CRHR2     |
| 0.561589765 | stable | FBXO43    |
| 0.561589765 | stable | CASKIN2   |
| 0.561589765 | stable | OLA1      |
| 0.561654614 | stable | RPL23AP7  |
| 0.561669825 | stable | ALOX12B   |
| 0.561742534 | stable | LOC652086 |
| 0.561742534 | stable | LOC285299 |
| 0.561742534 | stable | LOC648329 |
| 0.561762363 | stable | MEP1A     |
| 0.561762363 | stable | TMEM175   |
| 0.561762363 | stable | FLJ35773  |
| 0.561789206 | stable | OR51A4    |
| 0.561847408 | stable | LNP1      |
| 0.561847408 | stable | UTP20     |
| 0.561969756 | stable | LOC644285 |
| 0.561991666 | stable | LOC650509 |
| 0.562036117 | stable | LOC389370 |
| 0.562073353 | stable | LOC389813 |
| 0.562073353 | stable | HSD11B2   |
| 0.562278625 | stable | LOC138652 |
| 0.562300493 | stable | MAGEA9    |
| 0.562348081 | stable | LOC728565 |
| 0.56240207  | stable | LOC389457 |
| 0.562623841 | stable | IFIT1L    |
| 0.562623841 | stable | LOC648796 |
| 0.562929867 | stable | SLC6A3    |
| 0.56334233  | stable | ZNF385C   |
| 0.563357368 | stable | LOC646492 |
| 0.563392234 | stable | LOC652743 |
| 0.563480946 | stable | LOC644090 |
| 0.56359321  | stable | DPH1      |
| 0.563656224 | stable | LOC645317 |

## DEG.infomation

|             |        |           |
|-------------|--------|-----------|
| 0.563697161 | stable | LOC652529 |
| 0.563795341 | stable | BTF3L4    |
| 0.563806212 | stable | LOC647154 |
| 0.563806212 | stable | LOC440917 |
| 0.563937862 | stable | CDX1      |
| 0.564003762 | stable | LOC647960 |
| 0.564012529 | stable | LOC728103 |
| 0.564012529 | stable | MUC4      |
| 0.564211932 | stable | ERICH1    |
| 0.564274143 | stable | NEDD4     |
| 0.564469762 | stable | DEFA6     |
| 0.564483159 | stable | OR6C65    |
| 0.564758908 | stable | PRLR      |
| 0.564915241 | stable | EEFSEC    |
| 0.564915241 | stable | CASP8AP2  |
| 0.564915241 | stable | LOC642347 |
| 0.564915241 | stable | KCNJ14    |
| 0.564915241 | stable | OPRK1     |
| 0.564915241 | stable | OR4A15    |
| 0.564949922 | stable | LOC641311 |
| 0.565074026 | stable | MAGEA10   |
| 0.565157057 | stable | LOC650185 |
| 0.565186368 | stable | PRPF3     |
| 0.56537294  | stable | BMP3      |
| 0.56537294  | stable | LOC648480 |
| 0.565386702 | stable | WDR12     |
| 0.565405453 | stable | SLC5A9    |
| 0.565454524 | stable | PSG2      |
| 0.565454524 | stable | LOC729837 |
| 0.565459076 | stable | CYP17A1   |
| 0.565533353 | stable | KRT15     |
| 0.565533353 | stable | FAM46D    |
| 0.565591299 | stable | RFX6      |
| 0.565981796 | stable | CHST5     |
| 0.565981796 | stable | LOC645636 |
| 0.566213674 | stable | GPC2      |
| 0.566362419 | stable | HSPA4     |
| 0.566370538 | stable | DVL1      |
| 0.566399713 | stable | C11ORF84  |
| 0.566487727 | stable | LOC652805 |
| 0.566487727 | stable | SPIN2A    |
| 0.566487727 | stable | GRIN1     |
| 0.566487727 | stable | LOC652566 |
| 0.566753123 | stable | CEP192    |
| 0.566776639 | stable | APOBEC1   |
| 0.566978763 | stable | USP51     |
| 0.567109581 | stable | METTTL7A  |
| 0.567138617 | stable | LOC641802 |
| 0.567463845 | stable | LOC653591 |
| 0.567463845 | stable | C1ORF38   |
| 0.567569806 | stable | FAM96A    |

## DEG.infomation

|             |        |           |
|-------------|--------|-----------|
| 0.567569806 | stable | FGF16     |
| 0.567633982 | stable | LOC391282 |
| 0.567676457 | stable | LOC644099 |
| 0.567722834 | stable | PDE8B     |
| 0.567723156 | stable | KNG1      |
| 0.567789598 | stable | SLC25A10  |
| 0.567789598 | stable | DAZ4      |
| 0.56783239  | stable | DDA1      |
| 0.56783239  | stable | TCF19     |
| 0.56783239  | stable | LOC441261 |
| 0.56783239  | stable | LOC731444 |
| 0.567853114 | stable | LOC284577 |
| 0.567874278 | stable | ZNF804B   |
| 0.56818006  | stable | LOC643006 |
| 0.568218636 | stable | GPR144    |
| 0.568279699 | stable | LOC402117 |
| 0.568353533 | stable | CC2D1B    |
| 0.568353533 | stable | CD7       |
| 0.568628432 | stable | ROPN1     |
| 0.568696722 | stable | C18ORF45  |
| 0.568748716 | stable | MFRP      |
| 0.568863866 | stable | NAPSB     |
| 0.568901086 | stable | LOC440934 |
| 0.568975245 | stable | MMP7      |
| 0.569048745 | stable | LOC650298 |
| 0.569048745 | stable | NEUROD4   |
| 0.569126607 | stable | CCDC28B   |
| 0.569131168 | stable | HLXB9     |
| 0.569185558 | stable | LOC727778 |
| 0.569185558 | stable | LOC441249 |
| 0.569185558 | stable | C7ORF34   |
| 0.569416973 | stable | CLDN4     |
| 0.569416973 | stable | SQLE      |
| 0.569416973 | stable | OR2W3     |
| 0.569469728 | stable | ANKRD21   |
| 0.569469728 | stable | GRHL1     |
| 0.569469728 | stable | OTOP2     |
| 0.569507468 | stable | LOC644043 |
| 0.569507468 | stable | LOC653917 |
| 0.569555813 | stable | LOC649546 |
| 0.56961553  | stable | FLJ16171  |
| 0.569730533 | stable | RNF32     |
| 0.569805596 | stable | CLRN3     |
| 0.569819319 | stable | CLPX      |
| 0.569819319 | stable | LOC648039 |
| 0.569819319 | stable | GATAD2B   |
| 0.569898356 | stable | FMN2      |
| 0.569898356 | stable | LOC653623 |
| 0.57000605  | stable | LOC651979 |
| 0.570035854 | stable | HAP1      |
| 0.570106567 | stable | RLBP1     |

## DEG.infomation

|             |        |           |
|-------------|--------|-----------|
| 0.570106567 | stable | LOC654134 |
| 0.570304031 | stable | SNF8      |
| 0.57054259  | stable | CRISP1    |
| 0.570614843 | stable | LOC644975 |
| 0.570614843 | stable | LOC401876 |
| 0.570614843 | stable | LOC728832 |
| 0.570614843 | stable | C6ORF170  |
| 0.570614843 | stable | SNCB      |
| 0.570664783 | stable | LOC643355 |
| 0.570764016 | stable | PRPF38A   |
| 0.570764016 | stable | DDX47     |
| 0.570817323 | stable | LYCAT     |
| 0.571115468 | stable | LOC730027 |
| 0.571152602 | stable | ZNF786    |
| 0.571152602 | stable | LOC648700 |
| 0.571152602 | stable | GTF3C4    |
| 0.571189477 | stable | HMHB1     |
| 0.571315292 | stable | SFT2D2    |
| 0.571315292 | stable | CRYGD     |
| 0.571589588 | stable | GOSR1     |
| 0.571589588 | stable | C6ORF191  |
| 0.571875846 | stable | PROC      |
| 0.571961013 | stable | TMEM131   |
| 0.572111106 | stable | LOC643152 |
| 0.572385128 | stable | CCDC63    |
| 0.572645706 | stable | LOC400707 |
| 0.572645706 | stable | LOC649723 |
| 0.572645706 | stable | ZNF670    |
| 0.572645706 | stable | TLE2      |
| 0.572802882 | stable | LOC442283 |
| 0.572812616 | stable | LOC644059 |
| 0.573005033 | stable | PTF1A     |
| 0.573128903 | stable | LOC644845 |
| 0.573351846 | stable | LOC642313 |
| 0.574096921 | stable | MRPL2     |
| 0.574131494 | stable | SEPHS2    |
| 0.574237529 | stable | B3GNTL1   |
| 0.574259422 | stable | LOC644234 |
| 0.574340234 | stable | FLJ43806  |
| 0.574366441 | stable | DHDH      |
| 0.574482294 | stable | OR2A14    |
| 0.574482294 | stable | LOC440341 |
| 0.574543044 | stable | UBA7      |
| 0.574605315 | stable | LOC644319 |
| 0.574783085 | stable | ITPK1     |
| 0.57483475  | stable | ICAM4     |
| 0.57483475  | stable | KRT222P   |
| 0.574841707 | stable | LOC642985 |
| 0.574841707 | stable | SP8       |
| 0.575177412 | stable | SHH       |
| 0.575177412 | stable | FOXD1     |



DEG.infomation

|             |        |           |
|-------------|--------|-----------|
| 0.575390275 | stable | LOC644044 |
| 0.575390275 | stable | KCNJ3     |
| 0.575395442 | stable | LOC651668 |
| 0.575555137 | stable | LOC653759 |
| 0.5755761   | stable | LOC652793 |
| 0.575611136 | stable | MEP1B     |
| 0.575611136 | stable | LOC728116 |
| 0.575611136 | stable | MRPL42    |
| 0.575611136 | stable | LOC285095 |
| 0.575781197 | stable | LOC649150 |
| 0.575860126 | stable | LOC402641 |
| 0.576096289 | stable | CHD8      |
| 0.576258964 | stable | SERAC1    |
| 0.576258964 | stable | LOC441874 |
| 0.576258964 | stable | LOC390877 |
| 0.576334067 | stable | BLID      |
| 0.576334067 | stable | NOL10     |
| 0.576437982 | stable | HTR7      |
| 0.57643872  | stable | LOC340094 |
| 0.576590492 | stable | ISCA2     |
| 0.576697378 | stable | RTN2      |
| 0.576735948 | stable | AVPI1     |
| 0.576815579 | stable | LOC646920 |
| 0.57704719  | stable | TRHR      |
| 0.57704719  | stable | ASCL3     |
| 0.57704719  | stable | H2AFB1    |
| 0.57704719  | stable | SLC25A32  |
| 0.577140079 | stable | KCTD10    |
| 0.577154917 | stable | TRIM13    |
| 0.577154917 | stable | LOC642939 |
| 0.577201041 | stable | CHORDC1   |
| 0.577201041 | stable | LOC648684 |
| 0.577372654 | stable | PEX12     |
| 0.577372654 | stable | IGF1R     |
| 0.577515141 | stable | LOC653867 |
| 0.577569728 | stable | CD19      |
| 0.577569728 | stable | TNNI2     |
| 0.577702634 | stable | LOC651987 |
| 0.577762413 | stable | TGM7      |
| 0.577762413 | stable | LOC343296 |
| 0.577762413 | stable | OTOS      |
| 0.577834722 | stable | UBQLN3    |
| 0.577959516 | stable | LOC646946 |
| 0.578069632 | stable | SLC43A1   |
| 0.578111479 | stable | SH3GL3    |
| 0.578111479 | stable | LOC729957 |
| 0.578111479 | stable | FLJ40504  |
| 0.578111479 | stable | FLJ31945  |
| 0.578111479 | stable | EIF5B     |
| 0.578283762 | stable | ESR2      |
| 0.578758025 | stable | LOC255025 |

## DEG.infomation

|             |        |           |
|-------------|--------|-----------|
| 0.579013154 | stable | LOC644421 |
| 0.579137899 | stable | SPSB4     |
| 0.57919181  | stable | LECT2     |
| 0.57919181  | stable | MGC13005  |
| 0.579291849 | stable | LOC642680 |
| 0.579291849 | stable | DLEU2     |
| 0.579291849 | stable | FHL1      |
| 0.579291849 | stable | C2ORF58   |
| 0.579307179 | stable | C3ORF48   |
| 0.579307179 | stable | LOC652466 |
| 0.579362447 | stable | LOC650815 |
| 0.579451286 | stable | GPR123    |
| 0.579451286 | stable | SNED1     |
| 0.579535309 | stable | OR1L8     |
| 0.579535309 | stable | FLJ40448  |
| 0.579535309 | stable | CYP19A1   |
| 0.579535309 | stable | BCL2L15   |
| 0.579535309 | stable | UBE2C     |
| 0.579535309 | stable | C10ORF28  |
| 0.579535309 | stable | LOC649765 |
| 0.579535309 | stable | LOC650455 |
| 0.579955522 | stable | ZBED3     |
| 0.580015943 | stable | PLA2G2F   |
| 0.580038434 | stable | NUMA1     |
| 0.580043685 | stable | LOC401525 |
| 0.58012505  | stable | BXDC2     |
| 0.58012505  | stable | IRGM      |
| 0.58012505  | stable | WNT10B    |
| 0.58012505  | stable | LOC652396 |
| 0.58012505  | stable | ERG       |
| 0.58012505  | stable | CD226     |
| 0.580138075 | stable | KCNC3     |
| 0.580313024 | stable | LOC647630 |
| 0.580332409 | stable | C1ORF91   |
| 0.58036885  | stable | CNGA2     |
| 0.580379398 | stable | LOC652341 |
| 0.580379398 | stable | PSEN2     |
| 0.580619158 | stable | LOC643734 |
| 0.580895232 | stable | LOC648803 |
| 0.580917099 | stable | CYP4F3    |
| 0.581056051 | stable | C5ORF34   |
| 0.581256968 | stable | CNTLN     |
| 0.581293075 | stable | CCDC148   |
| 0.581293075 | stable | LOC646580 |
| 0.581379409 | stable | MPG       |
| 0.581379409 | stable | TFF1      |
| 0.581573124 | stable | BFSP2     |
| 0.581573124 | stable | FLJ16124  |
| 0.58171211  | stable | RIN1      |
| 0.581793071 | stable | MAGEB6B   |
| 0.581822227 | stable | LGALS4    |

DEG.infomation

|             |        |           |
|-------------|--------|-----------|
| 0.581849752 | stable | DOC2A     |
| 0.581849752 | stable | WDR23     |
| 0.581849752 | stable | HCCA2     |
| 0.582040406 | stable | LOC645529 |
| 0.582093732 | stable | ZP4       |
| 0.58213773  | stable | LOC646443 |
| 0.58213773  | stable | LOC653653 |
| 0.582158004 | stable | ADAM12    |
| 0.582158004 | stable | FAM87B    |
| 0.582189889 | stable | TTY6      |
| 0.582368951 | stable | ADCK4     |
| 0.582434982 | stable | SFTP8     |
| 0.582542499 | stable | MYOC      |
| 0.582657658 | stable | HNRPUL2   |
| 0.582657658 | stable | PSD       |
| 0.582881152 | stable | LOC643988 |
| 0.582881152 | stable | RBM35A    |
| 0.582881152 | stable | WNT3      |
| 0.582881152 | stable | GPR87     |
| 0.582881152 | stable | GSTA5     |
| 0.582888787 | stable | RGS20     |
| 0.583029111 | stable | LGR4      |
| 0.583029111 | stable | DDX19A    |
| 0.583277946 | stable | RASL10B   |
| 0.583472332 | stable | CTAGE1    |
| 0.58348859  | stable | LST-3TM12 |
| 0.58348859  | stable | GABRA6    |
| 0.583506813 | stable | LOC651876 |
| 0.583932679 | stable | ETFDH     |
| 0.583932679 | stable | LOC650942 |
| 0.584015064 | stable | LOC645039 |
| 0.584315268 | stable | C10ORF113 |
| 0.584315268 | stable | GPR182    |
| 0.58433638  | stable | C10ORF90  |
| 0.58433638  | stable | LOC728160 |
| 0.58446527  | stable | SEMA3A    |
| 0.584509596 | stable | FOXA3     |
| 0.584693777 | stable | CCDC68    |
| 0.584696768 | stable | ERCC4     |
| 0.585242998 | stable | OR8G5     |
| 0.585508526 | stable | LOC652202 |
| 0.585511003 | stable | LDLRAD1   |
| 0.58557518  | stable | LOC648792 |
| 0.585594307 | stable | PKHD1     |
| 0.585626798 | stable | LOC143941 |
| 0.585626798 | stable | RPRML     |
| 0.585671608 | stable | NLGN3     |
| 0.585760639 | stable | DCP1B     |
| 0.585783835 | stable | GUCA1A    |
| 0.585826618 | stable | LOC648752 |
| 0.5859184   | stable | DHX58     |

DEG.infomation

|             |        |           |
|-------------|--------|-----------|
| 0.5859184   | stable | TAS2R48   |
| 0.5859184   | stable | CFHR4     |
| 0.586163823 | stable | MOGAT3    |
| 0.586173995 | stable | SLC37A1   |
| 0.586241984 | stable | ZDHHC3    |
| 0.586259789 | stable | CSN2      |
| 0.586867765 | stable | LOC650020 |
| 0.58698557  | stable | LOC642594 |
| 0.58710375  | stable | FSTL4     |
| 0.58710375  | stable | NTN2L     |
| 0.58710375  | stable | ZNF683    |
| 0.58710375  | stable | LCE1D     |
| 0.58710375  | stable | KIAA1627  |
| 0.58710375  | stable | CCDC123   |
| 0.587134192 | stable | LOC644277 |
| 0.587182252 | stable | FGL1      |
| 0.587266947 | stable | BPIL2     |
| 0.587333396 | stable | XAGE1D    |
| 0.587333396 | stable | DCN       |
| 0.587333396 | stable | WNT8A     |
| 0.587336468 | stable | MCC       |
| 0.587369565 | stable | TATDN1    |
| 0.58741848  | stable | ZNF358    |
| 0.58755776  | stable | LOC389142 |
| 0.58755776  | stable | UNC5D     |
| 0.58755776  | stable | LOC497256 |
| 0.58755776  | stable | LOC143678 |
| 0.587567787 | stable | OTC       |
| 0.587567787 | stable | LOC441135 |
| 0.587576964 | stable | FMO9P     |
| 0.587678936 | stable | TTY19     |
| 0.587840402 | stable | PKIB      |
| 0.588030573 | stable | LOC390364 |
| 0.588048194 | stable | LOC644278 |
| 0.588226661 | stable | LOC651353 |
| 0.588237326 | stable | TTY18     |
| 0.588399417 | stable | CPN1      |
| 0.588410285 | stable | LOC653093 |
| 0.588602309 | stable | PRAMEF5   |
| 0.588602309 | stable | MED4      |
| 0.588602309 | stable | LOC389111 |
| 0.588689027 | stable | LOC643083 |
| 0.588818249 | stable | LOC338667 |
| 0.589096129 | stable | LOC651390 |
| 0.589096467 | stable | TPTE2     |
| 0.589183183 | stable | FUT11     |
| 0.589505959 | stable | HBM       |
| 0.589515758 | stable | HMGCS2    |
| 0.589516847 | stable | MLNR      |
| 0.589559495 | stable | MTMR6     |
| 0.590030702 | stable | LOC652670 |

DEG.infomation

|             |        |           |
|-------------|--------|-----------|
| 0.59004392  | stable | LOC642082 |
| 0.59004392  | stable | SFRS2B    |
| 0.590234875 | stable | DSCR10    |
| 0.590313617 | stable | LOC643841 |
| 0.590346739 | stable | LOC647456 |
| 0.590346739 | stable | SLC24A3   |
| 0.590822974 | stable | LOC728643 |
| 0.59085179  | stable | C12ORF32  |
| 0.59098915  | stable | RELT      |
| 0.59098915  | stable | PCDHB1    |
| 0.591049316 | stable | OR13C4    |
| 0.591049316 | stable | LOC642574 |
| 0.591049316 | stable | LOC649067 |
| 0.591049316 | stable | MCM7      |
| 0.591049316 | stable | CCDC105   |
| 0.591049316 | stable | GPR103    |
| 0.591150449 | stable | SLC38A11  |
| 0.591178634 | stable | LOC648716 |
| 0.591181405 | stable | LOC390372 |
| 0.591181405 | stable | LOC643433 |
| 0.591497023 | stable | ANKRD49   |
| 0.591497023 | stable | LOC441114 |
| 0.591708746 | stable | LOC644280 |
| 0.591791107 | stable | TEX13B    |
| 0.591791107 | stable | LOC440295 |
| 0.591888236 | stable | CCDC54    |
| 0.591889084 | stable | COLEC12   |
| 0.591889084 | stable | LOC652651 |
| 0.592159898 | stable | LOC649227 |
| 0.592313769 | stable | BANK1     |
| 0.592387998 | stable | FAM171B   |
| 0.592603491 | stable | LOC645079 |
| 0.592630004 | stable | EIF5A2    |
| 0.592630004 | stable | LOC285500 |
| 0.592630004 | stable | CENPI     |
| 0.592876226 | stable | LOC641751 |
| 0.592979905 | stable | DENND1C   |
| 0.592980151 | stable | HOXA9     |
| 0.592980151 | stable | LOC647579 |
| 0.593076045 | stable | TMEM38B   |
| 0.593263702 | stable | MUC17     |
| 0.593434431 | stable | FLJ42986  |
| 0.593434431 | stable | OR4F4     |
| 0.593434431 | stable | LOC644326 |
| 0.593434431 | stable | SPANXN5   |
| 0.593434431 | stable | SYS1      |
| 0.593546123 | stable | C1ORF92   |
| 0.593546123 | stable | LOC644964 |
| 0.593718682 | stable | CHRNA9    |
| 0.593720779 | stable | ATP4A     |
| 0.593822269 | stable | C15ORF20  |

## DEG.infomation

|             |        |           |
|-------------|--------|-----------|
| 0.593935981 | stable | LOC651809 |
| 0.593950585 | stable | ZNF253    |
| 0.594214725 | stable | KCNJ6     |
| 0.594387066 | stable | PWWP2B    |
| 0.594397221 | stable | ZMYND15   |
| 0.594408686 | stable | LOC147975 |
| 0.594425667 | stable | POU1F1    |
| 0.594456611 | stable | IFITM5    |
| 0.59461208  | stable | TMEM35    |
| 0.594636977 | stable | ZNF648    |
| 0.594860423 | stable | RLTPR     |
| 0.594992069 | stable | KIAA0329  |
| 0.595319285 | stable | LOC652552 |
| 0.595611166 | stable | CH25H     |
| 0.595611166 | stable | DHRS8     |
| 0.595611166 | stable | C6ORF136  |
| 0.595830643 | stable | LOC647244 |
| 0.59585541  | stable | GAB4      |
| 0.595856219 | stable | CREBBP    |
| 0.595856219 | stable | NFATC2    |
| 0.595873302 | stable | KRT33B    |
| 0.59596772  | stable | GP6       |
| 0.59596772  | stable | TRMT2B    |
| 0.59596772  | stable | LOC653584 |
| 0.59596772  | stable | LOC641860 |
| 0.595976037 | stable | LOC345051 |
| 0.595976037 | stable | MICA      |
| 0.595976037 | stable | SOAT2     |
| 0.596531852 | stable | LOC642580 |
| 0.596531852 | stable | LRP11     |
| 0.596531852 | stable | LOC651553 |
| 0.596537996 | stable | LOC643900 |
| 0.596701265 | stable | LOC388160 |
| 0.596714115 | stable | LOC643233 |
| 0.59681185  | stable | LBX2      |
| 0.596853738 | stable | C10ORF122 |
| 0.59700943  | stable | LOC647191 |
| 0.597010628 | stable | ACACA     |
| 0.597076183 | stable | NXF4      |
| 0.59711074  | stable | CDK5R1    |
| 0.59711074  | stable | ZNF554    |
| 0.597421731 | stable | INF2      |
| 0.59756772  | stable | TANK      |
| 0.59767179  | stable | FLJ25715  |
| 0.597982287 | stable | ANKRD1    |
| 0.597982287 | stable | ALPPL2    |
| 0.597982287 | stable | LOC643721 |
| 0.597982287 | stable | PLCD1     |
| 0.598004415 | stable | UHRF2     |
| 0.598057027 | stable | INA       |
| 0.598064097 | stable | LOC644302 |

## DEG.infomation

|             |        |           |
|-------------|--------|-----------|
| 0.598064097 | stable | LOC650836 |
| 0.598118043 | stable | LOC651012 |
| 0.598203219 | stable | LOC644225 |
| 0.598230293 | stable | IL28A     |
| 0.598522788 | stable | LOC652294 |
| 0.598522788 | stable | LOC641714 |
| 0.598522906 | stable | OBSCN     |
| 0.598674184 | stable | UBE2E2    |
| 0.598674184 | stable | LOC651965 |
| 0.598674184 | stable | SSX6      |
| 0.598674184 | stable | LOC652134 |
| 0.598748041 | stable | LOC653240 |
| 0.599002893 | stable | LOC649548 |
| 0.599010298 | stable | MPP1      |
| 0.599156337 | stable | LOC653817 |
| 0.599343473 | stable | TMEM137   |
| 0.599349746 | stable | MYO6      |
| 0.599349746 | stable | FAM90A20  |
| 0.599360133 | stable | LOC645634 |
| 0.599363169 | stable | ZNF33B    |
| 0.599478522 | stable | LOC643533 |
| 0.599478522 | stable | LOC642425 |
| 0.599494296 | stable | CPA2      |
| 0.599774704 | stable | FLJ41046  |
| 0.600021024 | stable | MXD3      |
| 0.600059654 | stable | LOC442329 |
| 0.600113184 | stable | LOC647648 |
| 0.600398865 | stable | NHLRC1    |
| 0.600583642 | stable | SLC45A3   |
| 0.600583642 | stable | LOC643594 |
| 0.600583642 | stable | LOC642626 |
| 0.600583642 | stable | LOC731052 |
| 0.600583642 | stable | LOC644923 |
| 0.600730534 | stable | TM4SF19   |
| 0.601169353 | stable | TEX28     |
| 0.601195993 | stable | ITPR2     |
| 0.601244656 | stable | LOC644351 |
| 0.60126817  | stable | RALYL     |
| 0.601376188 | stable | PHYHIPL   |
| 0.601376188 | stable | ADCY8     |
| 0.601674447 | stable | LOC644126 |
| 0.60201795  | stable | LOC652476 |
| 0.602095796 | stable | HTR2A     |
| 0.602101169 | stable | INSM2     |
| 0.602167259 | stable | LOC648569 |
| 0.602270133 | stable | CSRP3     |
| 0.602377125 | stable | TRMT12    |
| 0.602444674 | stable | FGD5      |
| 0.602444674 | stable | LOC644981 |
| 0.602691191 | stable | VNN3      |
| 0.602691191 | stable | LOC643624 |

## DEG.infomation

|             |        |               |
|-------------|--------|---------------|
| 0.602778607 | stable | LOC645627     |
| 0.602883837 | stable | PTDSS2        |
| 0.603015865 | stable | LOC339047     |
| 0.603015865 | stable | LOC642160     |
| 0.603021542 | stable | LOC642103     |
| 0.603021542 | stable | LOC729370     |
| 0.603021542 | stable | CTSE          |
| 0.603046628 | stable | RBM           |
| 0.6032169   | stable | KIAA0953      |
| 0.603283114 | stable | LOC642049     |
| 0.603630039 | stable | CLSTN3        |
| 0.603677526 | stable | MAGI3         |
| 0.603677526 | stable | TEP1          |
| 0.603857691 | stable | C14ORF82      |
| 0.603991385 | stable | DISP2         |
| 0.603998637 | stable | DONSON        |
| 0.604070309 | stable | SCG3          |
| 0.604070309 | stable | LOC644785     |
| 0.604292788 | stable | LOC731049     |
| 0.604340705 | stable | OR51A7        |
| 0.604584448 | stable | LOC643492     |
| 0.604584448 | stable | LOC642268     |
| 0.604830595 | stable | TMEM65        |
| 0.604830595 | stable | STYK1         |
| 0.604830595 | stable | NPTN          |
| 0.60489812  | stable | TM4SF20       |
| 0.605240983 | stable | MGC40574      |
| 0.605248709 | stable | LOC645891     |
| 0.605298908 | stable | PTGR2         |
| 0.605535909 | stable | LOC646698     |
| 0.605535909 | stable | LOC644359     |
| 0.605569109 | stable | LOC730274     |
| 0.605657822 | stable | AADA4L4       |
| 0.605721813 | stable | C11ORF76      |
| 0.605898878 | stable | CDC26         |
| 0.605938744 | stable | LOC652491     |
| 0.605938744 | stable | TMEM85        |
| 0.605938744 | stable | FHL5          |
| 0.606065539 | stable | LOC648050     |
| 0.606095335 | stable | MEPE          |
| 0.606104473 | stable | RDH12         |
| 0.606104473 | stable | DKFZP686E2158 |
| 0.606104473 | stable | POLS          |
| 0.606117498 | stable | PCNXL3        |
| 0.606175244 | stable | VAC14         |
| 0.606229177 | stable | RRAGC         |
| 0.606269596 | stable | LOC728066     |
| 0.606312557 | stable | FABP1         |
| 0.606312557 | stable | PRSS23        |
| 0.606355416 | stable | LOC651196     |
| 0.606355416 | stable | LOC643236     |



## DEG.infomation

|             |        |           |
|-------------|--------|-----------|
| 0.606488499 | stable | GYPB      |
| 0.606488499 | stable | LRDD      |
| 0.606860378 | stable | PNCK      |
| 0.606860378 | stable | MARCH6    |
| 0.606860378 | stable | SIM1      |
| 0.60697403  | stable | KIF16B    |
| 0.60697403  | stable | LOC642198 |
| 0.607121805 | stable | REG1P     |
| 0.607154156 | stable | ITCH      |
| 0.607154156 | stable | LOC643120 |
| 0.607156471 | stable | LOC643313 |
| 0.607161112 | stable | TBC1D3E   |
| 0.607218027 | stable | LOC646501 |
| 0.607521149 | stable | RPS20     |
| 0.607581334 | stable | LOC642772 |
| 0.607591634 | stable | LOC650788 |
| 0.607597069 | stable | TTC39A    |
| 0.607639295 | stable | CYP2C19   |
| 0.607678597 | stable | HOXD11    |
| 0.60780976  | stable | TIGD5     |
| 0.60780976  | stable | SFTPA2    |
| 0.607830807 | stable | DCLRE1B   |
| 0.60789923  | stable | PRKACA    |
| 0.60789923  | stable | LOC642295 |
| 0.60789923  | stable | LOC390547 |
| 0.608039546 | stable | LOC648174 |
| 0.608039546 | stable | LOC647295 |
| 0.608154346 | stable | LOC439985 |
| 0.608219591 | stable | TOPBP1    |
| 0.608219591 | stable | CHST8     |
| 0.608248385 | stable | FLJ35785  |
| 0.608269939 | stable | CREB3L1   |
| 0.608270087 | stable | OR5AY1    |
| 0.60836722  | stable | LOC652043 |
| 0.60836722  | stable | FLJ38773  |
| 0.60845555  | stable | PYGO1     |
| 0.608566071 | stable | LOC644056 |
| 0.60858062  | stable | LOC644843 |
| 0.608641341 | stable | SCN2A     |
| 0.608760864 | stable | DGKH      |
| 0.608760864 | stable | GPATCH8   |
| 0.608760864 | stable | TSGA10    |
| 0.608761128 | stable | HAPLN3    |
| 0.608834724 | stable | LOC149643 |
| 0.608834724 | stable | RNASE12   |
| 0.608847047 | stable | OR5H1     |
| 0.608973832 | stable | SLC15A1   |
| 0.608973832 | stable | C1ORF131  |
| 0.609051147 | stable | LOC441792 |
| 0.609130587 | stable | LOC441907 |
| 0.60924947  | stable | LOC653968 |

## DEG.infomation

|             |        |               |
|-------------|--------|---------------|
| 0.60924947  | stable | LOC649770     |
| 0.60924947  | stable | LATS2         |
| 0.609256805 | stable | MKI67         |
| 0.609567414 | stable | LOC644408     |
| 0.609647359 | stable | LOC400927     |
| 0.609673519 | stable | TBX5          |
| 0.609723189 | stable | TAS2R3        |
| 0.609723189 | stable | FAM130A1      |
| 0.609723189 | stable | KIAA1984      |
| 0.610166405 | stable | TAF4B         |
| 0.610166405 | stable | LOC643630     |
| 0.610481346 | stable | HIGD2BP       |
| 0.610481346 | stable | PBK           |
| 0.610640442 | stable | DEFB125       |
| 0.610640442 | stable | LOC653252     |
| 0.610640442 | stable | LOC728499     |
| 0.610814805 | stable | LOC390570     |
| 0.610814805 | stable | LOC642980     |
| 0.610814805 | stable | TMC5          |
| 0.610904323 | stable | TMEM123       |
| 0.611006294 | stable | EVC2          |
| 0.611066709 | stable | LOC648069     |
| 0.611066709 | stable | GJD4          |
| 0.611191012 | stable | FA2H          |
| 0.6113037   | stable | LOC730995     |
| 0.61154006  | stable | TMEM105       |
| 0.61154006  | stable | PHLDB3        |
| 0.611684297 | stable | C18ORF16      |
| 0.611740073 | stable | LOC123876     |
| 0.611789079 | stable | LOC253573     |
| 0.611789079 | stable | KU-MEL-3      |
| 0.611789079 | stable | LRRFIP1       |
| 0.611902684 | stable | ALOXE3        |
| 0.611902684 | stable | DKFZP686O1327 |
| 0.611973847 | stable | GTF2F1        |
| 0.611973847 | stable | CLDN8         |
| 0.612085206 | stable | LOC651476     |
| 0.612085206 | stable | LOC649396     |
| 0.612085206 | stable | CA4           |
| 0.612124333 | stable | FLJ30375      |
| 0.612124333 | stable | LOC649025     |
| 0.612124333 | stable | LOC401010     |
| 0.612124333 | stable | GSTA1         |
| 0.612554225 | stable | LOC643391     |
| 0.612554225 | stable | LOC649749     |
| 0.612554225 | stable | ANKK1         |
| 0.612554225 | stable | RPS4X         |
| 0.612554225 | stable | NOS1          |
| 0.61264316  | stable | GPR88         |
| 0.612717556 | stable | LOC652231     |
| 0.612745336 | stable | LOC650146     |

## DEG.infomation

|             |        |               |
|-------------|--------|---------------|
| 0.612936253 | stable | ABCC12        |
| 0.612941609 | stable | OR9A4         |
| 0.612968078 | stable | CDX4          |
| 0.612968078 | stable | PIGL          |
| 0.612968078 | stable | BAGE          |
| 0.612968078 | stable | LOC646496     |
| 0.612968078 | stable | SGOL2         |
| 0.613118395 | stable | KIAA1166      |
| 0.613118395 | stable | GBL           |
| 0.613118395 | stable | EMR1          |
| 0.613194935 | stable | KRTAP15-1     |
| 0.613194935 | stable | ZNF709        |
| 0.613231217 | stable | LOC645201     |
| 0.613237578 | stable | VPREB1        |
| 0.613391387 | stable | C1ORF65       |
| 0.613482477 | stable | SNRPB2        |
| 0.613489505 | stable | LOC650850     |
| 0.613646099 | stable | SLC29A4       |
| 0.613646099 | stable | LOC644422     |
| 0.613669545 | stable | C17ORF82      |
| 0.613669545 | stable | LOC731000     |
| 0.613732793 | stable | DPF1          |
| 0.614024081 | stable | OR5AS1        |
| 0.614059733 | stable | NCOA4         |
| 0.614059971 | stable | LOC650239     |
| 0.614059971 | stable | C1GALT1C1     |
| 0.614111261 | stable | DLX6          |
| 0.614121995 | stable | IPO7          |
| 0.614205195 | stable | GABRA5        |
| 0.614225453 | stable | LRRC7         |
| 0.614225453 | stable | DKFZP43411020 |
| 0.614262363 | stable | MAP3K4        |
| 0.61434377  | stable | CCDC120       |
| 0.61434377  | stable | LOC651936     |
| 0.614368878 | stable | ZSCAN20       |
| 0.614368878 | stable | DENND4C       |
| 0.614480299 | stable | OR5B12        |
| 0.614498798 | stable | LOC119358     |
| 0.614498798 | stable | MDS1          |
| 0.614559253 | stable | LOC388965     |
| 0.614559253 | stable | LOC642439     |
| 0.614736645 | stable | FIGF          |
| 0.614782822 | stable | STC2          |
| 0.614782822 | stable | LOC646226     |
| 0.614782822 | stable | SLC30A8       |
| 0.614782822 | stable | CCDC33        |
| 0.614858286 | stable | ZNF705A       |
| 0.61488932  | stable | TMTC3         |
| 0.614914942 | stable | LOC647971     |
| 0.615156269 | stable | LOC387761     |
| 0.615173193 | stable | DNAJB13       |

## DEG.infomation

|             |        |           |
|-------------|--------|-----------|
| 0.615219685 | stable | CRISP3    |
| 0.615219685 | stable | LOC728127 |
| 0.615219685 | stable | POU3F2    |
| 0.615219685 | stable | C9ORF71   |
| 0.615232698 | stable | SHQ1      |
| 0.615414556 | stable | GPR15     |
| 0.615438736 | stable | CYP26C1   |
| 0.615438736 | stable | GRTP1     |
| 0.615495169 | stable | LOC650268 |
| 0.615495169 | stable | ZNF382    |
| 0.615495169 | stable | SMYD3     |
| 0.615495169 | stable | FLJ33360  |
| 0.615495169 | stable | LOC650238 |
| 0.615495169 | stable | INHBC     |
| 0.615859492 | stable | MAGI2     |
| 0.615859492 | stable | HMG4L     |
| 0.615922485 | stable | PDZK1     |
| 0.615922485 | stable | LOC653680 |
| 0.615922485 | stable | LOC647131 |
| 0.615922485 | stable | LOC650651 |
| 0.615922485 | stable | LOC646037 |
| 0.616200701 | stable | ZNF563    |
| 0.6162328   | stable | FLJ45537  |
| 0.616297603 | stable | LOC390856 |
| 0.616306297 | stable | HIC1      |
| 0.616384556 | stable | LOC644571 |
| 0.616467449 | stable | PHF7      |
| 0.616467449 | stable | HOXC10    |
| 0.616681825 | stable | USP26     |
| 0.616681825 | stable | EDAR      |
| 0.616681825 | stable | LOC441869 |
| 0.616727868 | stable | LOC652806 |
| 0.616727868 | stable | LOC731035 |
| 0.616748426 | stable | NOB1      |
| 0.616748426 | stable | VEZF1     |
| 0.616748426 | stable | UPK1A     |
| 0.616790986 | stable | TMEM16D   |
| 0.616790986 | stable | LOC728089 |
| 0.616883346 | stable | TRNT1     |
| 0.616883346 | stable | LOC647591 |
| 0.616883346 | stable | PROKR1    |
| 0.617156163 | stable | LOC730804 |
| 0.617192755 | stable | TNNT2     |
| 0.617192755 | stable | LOC649189 |
| 0.617192755 | stable | DSG3      |
| 0.617221133 | stable | MAGEB10   |
| 0.617221133 | stable | LOC728269 |
| 0.617221133 | stable | FLJ35934  |
| 0.617496178 | stable | OR2T8     |
| 0.617598968 | stable | LOC647832 |
| 0.617615586 | stable | CDYL2     |

DEG.infomation

|             |        |           |
|-------------|--------|-----------|
| 0.61765222  | stable | C1ORF94   |
| 0.617660701 | stable | TAC1      |
| 0.617663244 | stable | UXS1      |
| 0.617697512 | stable | LOC653894 |
| 0.617723773 | stable | PDCD4     |
| 0.617729057 | stable | IL33      |
| 0.617729057 | stable | KRTHA5    |
| 0.617933993 | stable | AKT3      |
| 0.617998094 | stable | C4ORF11   |
| 0.618237936 | stable | CD2       |
| 0.618237936 | stable | PFDN2     |
| 0.618359704 | stable | C20ORF141 |
| 0.618359704 | stable | LOC652540 |
| 0.618423532 | stable | GK5       |
| 0.618423532 | stable | LOC647911 |
| 0.618492288 | stable | TBX2      |
| 0.618573449 | stable | C6ORF155  |
| 0.618718994 | stable | HIST1H2AH |
| 0.618718994 | stable | LOC646029 |
| 0.618862354 | stable | CDY1      |
| 0.619051518 | stable | KRT34     |
| 0.619051518 | stable | LOC645029 |
| 0.619051518 | stable | LOC651291 |
| 0.619114741 | stable | NUDT10    |
| 0.619287231 | stable | UPK1B     |
| 0.619328817 | stable | PTMS      |
| 0.619368715 | stable | ATR       |
| 0.619423175 | stable | GSTM2     |
| 0.619478011 | stable | LOC647011 |
| 0.619485425 | stable | WFDC13    |
| 0.619547465 | stable | CYP2B7P1  |
| 0.619565605 | stable | APOL5     |
| 0.619565605 | stable | LOC400163 |
| 0.619584713 | stable | CINP      |
| 0.619590749 | stable | FAM178B   |
| 0.619590749 | stable | LOC653412 |
| 0.619851263 | stable | USP8      |
| 0.619919643 | stable | LOC643467 |
| 0.619919643 | stable | ACSS2     |
| 0.619919643 | stable | C17ORF45  |
| 0.619919643 | stable | LOC643210 |
| 0.619919643 | stable | ASXL2     |
| 0.619919643 | stable | BMP15     |
| 0.619919643 | stable | MGC25181  |
| 0.619920022 | stable | OR2F2     |
| 0.620042831 | stable | NUDT16L1  |
| 0.620129203 | stable | LOC648490 |
| 0.620223896 | stable | LOC390282 |
| 0.620227795 | stable | C3ORF41   |
| 0.620227795 | stable | PABPC1L2B |
| 0.620323422 | stable | NUMB      |

DEG.infomation

|             |        |           |
|-------------|--------|-----------|
| 0.620363826 | stable | C9ORF25   |
| 0.620382111 | stable | TXNRD2    |
| 0.620512339 | stable | CRLF2     |
| 0.620512339 | stable | LOC653047 |
| 0.620695643 | stable | KSR1      |
| 0.62080672  | stable | DICER1    |
| 0.62080672  | stable | COX7C     |
| 0.62080672  | stable | LOC648289 |
| 0.62080672  | stable | LOC92154  |
| 0.620869698 | stable | LOC441868 |
| 0.620869698 | stable | LOC643791 |
| 0.620903109 | stable | ANAPC1    |
| 0.620954234 | stable | LOC440905 |
| 0.620954234 | stable | FLJ46347  |
| 0.621129292 | stable | LOC400174 |
| 0.621150985 | stable | EXDL1     |
| 0.621212016 | stable | WDR33     |
| 0.621629542 | stable | ESF1      |
| 0.621744565 | stable | LOC645781 |
| 0.621897007 | stable | FNTA      |
| 0.621897007 | stable | LOC389118 |
| 0.621944646 | stable | FATE1     |
| 0.621944646 | stable | FLJ38723  |
| 0.621944646 | stable | LOC440786 |
| 0.621944646 | stable | LOC643424 |
| 0.621944646 | stable | PRPF8     |
| 0.62237466  | stable | CCDC99    |
| 0.62237466  | stable | LOC652682 |
| 0.622451989 | stable | LOC440131 |
| 0.622492575 | stable | C10ORF46  |
| 0.622579255 | stable | C6ORF59   |
| 0.622588561 | stable | LOC643598 |
| 0.622588561 | stable | LOC653039 |
| 0.622588561 | stable | MRPS15    |
| 0.622590827 | stable | HIPK4     |
| 0.622590827 | stable | LUZP2     |
| 0.622803989 | stable | CSPG4LYP2 |
| 0.622932614 | stable | SLC35B3   |
| 0.622942881 | stable | ATG3      |
| 0.623039362 | stable | C12ORF54  |
| 0.62307282  | stable | SYT14     |
| 0.62307282  | stable | TXN2      |
| 0.62307282  | stable | RC3H1     |
| 0.62307282  | stable | LOC647651 |
| 0.62307282  | stable | LOC646278 |
| 0.62307282  | stable | ZCCHC24   |
| 0.623078949 | stable | LOC645084 |
| 0.62316491  | stable | LOC651062 |
| 0.623203643 | stable | LOC652224 |
| 0.623262545 | stable | CTGLF3    |
| 0.623311001 | stable | DUSP5P    |

## DEG.infomation

|             |        |           |
|-------------|--------|-----------|
| 0.623349114 | stable | SPOCD1    |
| 0.623349114 | stable | ELA3B     |
| 0.623386725 | stable | LOC654128 |
| 0.623407317 | stable | TCTN2     |
| 0.623418367 | stable | IL4       |
| 0.623713636 | stable | PHF13     |
| 0.623850319 | stable | LOC653857 |
| 0.623850319 | stable | LOC729777 |
| 0.623876133 | stable | LOC646012 |
| 0.623914821 | stable | LOC728763 |
| 0.623914821 | stable | LOC646452 |
| 0.623914821 | stable | SPG20     |
| 0.623914821 | stable | DGCR14    |
| 0.623980474 | stable | CCNT2     |
| 0.62406359  | stable | RUFY1     |
| 0.624073696 | stable | LOC731641 |
| 0.624073868 | stable | ANKRD34A  |
| 0.624073868 | stable | LOC652715 |
| 0.624073868 | stable | SORCS1    |
| 0.624097373 | stable | DEFB32    |
| 0.624097373 | stable | LOC650556 |
| 0.624231973 | stable | IER2      |
| 0.624432453 | stable | LOC343927 |
| 0.624432453 | stable | SULT1A3   |
| 0.624577301 | stable | LOC645465 |
| 0.624620891 | stable | FAM105B   |
| 0.624754184 | stable | LOC648362 |
| 0.624819166 | stable | LOC644800 |
| 0.624820244 | stable | LOC646708 |
| 0.624921009 | stable | BDKRB2    |
| 0.624974339 | stable | C6ORF129  |
| 0.625054222 | stable | LOC400682 |
| 0.625054222 | stable | CTSL2     |
| 0.625162871 | stable | KRTAP7-1  |
| 0.625514519 | stable | NSUN7     |
| 0.625534648 | stable | LOC642797 |
| 0.625551947 | stable | SORD      |
| 0.625636165 | stable | MSTO1     |
| 0.625690016 | stable | MGC40069  |
| 0.625739347 | stable | BBC3      |
| 0.625739347 | stable | TNFRSF12A |
| 0.625739347 | stable | CSTL1     |
| 0.62580462  | stable | GLTPD2    |
| 0.62580462  | stable | PPP4R2    |
| 0.625840605 | stable | LOC643216 |
| 0.625840605 | stable | AQP12A    |
| 0.62596261  | stable | LOC647704 |
| 0.626061362 | stable | FAM127C   |
| 0.6263659   | stable | LOC648489 |
| 0.626374708 | stable | LOC729254 |
| 0.626374708 | stable | TDO2      |

## DEG.infomation

|             |        |           |
|-------------|--------|-----------|
| 0.626655499 | stable | LOC644774 |
| 0.626722125 | stable | GALNT9    |
| 0.626722125 | stable | PSMA8     |
| 0.626722125 | stable | F13B      |
| 0.626722125 | stable | LOC728760 |
| 0.626826718 | stable | NLRP4     |
| 0.626830046 | stable | IGFL1     |
| 0.626922083 | stable | MARCKS    |
| 0.627102457 | stable | LOC650580 |
| 0.627164569 | stable | LOC343052 |
| 0.627214413 | stable | FLJ12688  |
| 0.627440834 | stable | LOC644781 |
| 0.627443604 | stable | CDH12     |
| 0.627443604 | stable | MRP63     |
| 0.627490928 | stable | LY6H      |
| 0.627553947 | stable | LOC644611 |
| 0.627641534 | stable | PTRF      |
| 0.627641534 | stable | LOC642504 |
| 0.627641534 | stable | LOC646300 |
| 0.627641534 | stable | TRR1      |
| 0.627729336 | stable | PTGR1     |
| 0.627729336 | stable | LOC644184 |
| 0.627729336 | stable | LOC729003 |
| 0.627729336 | stable | C10ORF129 |
| 0.627729336 | stable | LOC649417 |
| 0.627793536 | stable | HMX1      |
| 0.627935612 | stable | LOC646566 |
| 0.627935612 | stable | FLJ40244  |
| 0.627935612 | stable | UPB1      |
| 0.627935612 | stable | PVRIG     |
| 0.627935612 | stable | PLA2G10   |
| 0.627936481 | stable | CCDC150   |
| 0.627956682 | stable | LOC440607 |
| 0.627966408 | stable | KRTAP10-9 |
| 0.628106124 | stable | FBF1      |
| 0.628300141 | stable | LOC654155 |
| 0.628378462 | stable | TBC1D29   |
| 0.628482051 | stable | CDCP2     |
| 0.628572676 | stable | LOC651746 |
| 0.628616511 | stable | IFLTD1    |
| 0.62883127  | stable | KIF18B    |
| 0.62883127  | stable | C5ORF15   |
| 0.62883127  | stable | CHCHD2    |
| 0.62883127  | stable | C20ORF3   |
| 0.62883127  | stable | LOC644999 |
| 0.628957652 | stable | GSTM1     |
| 0.629060369 | stable | CEP76     |
| 0.629100415 | stable | OR1D2     |
| 0.629107183 | stable | LOC642782 |
| 0.629107183 | stable | PCDHGB3   |
| 0.629107183 | stable | WDR75     |



## DEG.infomation

|             |        |              |
|-------------|--------|--------------|
| 0.629148636 | stable | TYR          |
| 0.629210666 | stable | C6ORF174     |
| 0.629210666 | stable | LOC644844    |
| 0.629210666 | stable | ARPM2        |
| 0.629343719 | stable | TPRXL        |
| 0.629343719 | stable | DNAJC12      |
| 0.629405365 | stable | GDAP1L1      |
| 0.629465917 | stable | LOC128322    |
| 0.629465917 | stable | LOC642655    |
| 0.629465917 | stable | EML5         |
| 0.629555415 | stable | LOC391509    |
| 0.629555415 | stable | SARS2        |
| 0.629990277 | stable | FUT3         |
| 0.630183779 | stable | COCH         |
| 0.630183779 | stable | TRIB2        |
| 0.63033925  | stable | LOC651401    |
| 0.63033925  | stable | LOC440498    |
| 0.63033925  | stable | WDR64        |
| 0.630387322 | stable | TTC6         |
| 0.630421864 | stable | GRID2        |
| 0.630429909 | stable | LOC650036    |
| 0.630499361 | stable | ZNF22        |
| 0.630969209 | stable | OR52B6       |
| 0.630969209 | stable | AHRR         |
| 0.630969209 | stable | AIP          |
| 0.630969209 | stable | AIPL1        |
| 0.630969209 | stable | PANX3        |
| 0.630969209 | stable | LOC654023    |
| 0.630969209 | stable | LOC645574    |
| 0.630969209 | stable | C17ORF68     |
| 0.630969209 | stable | GP9          |
| 0.630969209 | stable | FLJ13305     |
| 0.630969209 | stable | BHMT         |
| 0.63107641  | stable | CISH         |
| 0.631120263 | stable | C1ORF55      |
| 0.631120263 | stable | PLCD4        |
| 0.631120263 | stable | CPT1A        |
| 0.631120263 | stable | RP11-45B20.2 |
| 0.631426366 | stable | TMEM133      |
| 0.631456248 | stable | RGS13        |
| 0.631683879 | stable | DRD5         |
| 0.631852093 | stable | FAM122C      |
| 0.631892999 | stable | LOC652441    |
| 0.631892999 | stable | GABRG3       |
| 0.631892999 | stable | LOC642588    |
| 0.631892999 | stable | UNC13D       |
| 0.631892999 | stable | OR2T5        |
| 0.631892999 | stable | LOC642334    |
| 0.631923746 | stable | CTRB2        |
| 0.63199817  | stable | LOC643719    |
| 0.632098018 | stable | TMC3         |

## DEG.infomation

|             |        |           |
|-------------|--------|-----------|
| 0.632098018 | stable | PPM1M     |
| 0.632098018 | stable | LOC644366 |
| 0.632148254 | stable | USP35     |
| 0.632156511 | stable | LOC648794 |
| 0.632547265 | stable | KRTAP4-4  |
| 0.632623799 | stable | TMEM34    |
| 0.632663852 | stable | JSRP1     |
| 0.632666422 | stable | TIFAB     |
| 0.632852563 | stable | C21ORF74  |
| 0.63292555  | stable | FLJ34870  |
| 0.63293799  | stable | GSTTP1    |
| 0.632949587 | stable | FAM113B   |
| 0.633088268 | stable | MTMR8     |
| 0.633338697 | stable | LOC441241 |
| 0.633338697 | stable | KIAA0406  |
| 0.633338697 | stable | LOC389791 |
| 0.633338697 | stable | RLBP1L2   |
| 0.633338697 | stable | C8ORF17   |
| 0.633476594 | stable | C21ORF93  |
| 0.633549036 | stable | ARL13B    |
| 0.633554199 | stable | RPL32     |
| 0.633554199 | stable | FLJ90680  |
| 0.633578276 | stable | LOC643412 |
| 0.633717582 | stable | FLJ27465  |
| 0.633914997 | stable | DCST1     |
| 0.633914997 | stable | LOC651974 |
| 0.63398167  | stable | LOC653830 |
| 0.634021464 | stable | LOC652222 |
| 0.634355735 | stable | TMEM63C   |
| 0.634413668 | stable | ACTA1     |
| 0.63442397  | stable | ZNF395    |
| 0.634707645 | stable | LOC651638 |
| 0.634720877 | stable | OGFOD2    |
| 0.634929262 | stable | LOC642456 |
| 0.635006203 | stable | IQCF2     |
| 0.635016691 | stable | C1ORF118  |
| 0.63505311  | stable | LOC387720 |
| 0.635115678 | stable | LOC652065 |
| 0.635410074 | stable | LUC7L2    |
| 0.635410074 | stable | LOC643935 |
| 0.635410074 | stable | CD2AP     |
| 0.63546887  | stable | UCN       |
| 0.63577054  | stable | EFNB3     |
| 0.63577054  | stable | PDE7B     |
| 0.63577054  | stable | PCDHGA9   |
| 0.63577054  | stable | GLTSCR2   |
| 0.63577054  | stable | IFNA5     |
| 0.635905759 | stable | LOC650976 |
| 0.635905759 | stable | C12ORF48  |
| 0.635915636 | stable | ZCCHC4    |
| 0.636096333 | stable | JPH4      |

## DEG.infomation

|             |        |           |
|-------------|--------|-----------|
| 0.636135154 | stable | LXN       |
| 0.636198767 | stable | CD3G      |
| 0.63620721  | stable | LOC653216 |
| 0.636247573 | stable | LOC390332 |
| 0.636247573 | stable | ALG11     |
| 0.636291248 | stable | LOC284371 |
| 0.636291248 | stable | CRIP1     |
| 0.636291248 | stable | LOC389199 |
| 0.636291248 | stable | COX6A2    |
| 0.63639657  | stable | FRMPD2L1  |
| 0.636428453 | stable | CBX1      |
| 0.636454681 | stable | C3ORF25   |
| 0.636527406 | stable | MEMO1     |
| 0.636583354 | stable | LOC651123 |
| 0.636629906 | stable | SLCO4C1   |
| 0.636629906 | stable | MGC12760  |
| 0.636672556 | stable | CHST11    |
| 0.636881635 | stable | CDADC1    |
| 0.636944875 | stable | DNAH3     |
| 0.636944875 | stable | LOC645964 |
| 0.63697086  | stable | WDR40C    |
| 0.63697086  | stable | FCRL4     |
| 0.63704202  | stable | HCRTR1    |
| 0.637099916 | stable | OR2L1P    |
| 0.637099916 | stable | DPRX      |
| 0.637213322 | stable | LOC727815 |
| 0.637213322 | stable | LOC641901 |
| 0.637339055 | stable | XYLT2     |
| 0.63735852  | stable | SPATA5    |
| 0.637420652 | stable | EIF1AY    |
| 0.637737899 | stable | SLC22A13  |
| 0.637840646 | stable | NRL       |
| 0.637840646 | stable | LOC646191 |
| 0.637842376 | stable | LOC257358 |
| 0.637842376 | stable | LOC647993 |
| 0.637842376 | stable | PRKY      |
| 0.637843678 | stable | OR6C70    |
| 0.637948791 | stable | C2ORF62   |
| 0.637990119 | stable | FAM3A     |
| 0.637990119 | stable | LOC642351 |
| 0.638059351 | stable | TBK1      |
| 0.638059351 | stable | FLJ43692  |
| 0.638059351 | stable | LOC652331 |
| 0.638070708 | stable | TTBK1     |
| 0.638077177 | stable | FLJ46363  |
| 0.638077177 | stable | CUL3      |
| 0.638077177 | stable | FAM3B     |
| 0.638108517 | stable | PKN1      |
| 0.638140555 | stable | IL17RE    |
| 0.638140555 | stable | LOC651916 |
| 0.638292731 | stable | PRDM15    |

## DEG.infomation

|             |        |             |
|-------------|--------|-------------|
| 0.638334741 | stable | ST6GALNAC3  |
| 0.638613758 | stable | LOC648245   |
| 0.638613758 | stable | LOC651647   |
| 0.638613758 | stable | LOC643035   |
| 0.638613758 | stable | OR12D3      |
| 0.638613758 | stable | OR4S1       |
| 0.638613758 | stable | LOC642904   |
| 0.638613758 | stable | LOC728145   |
| 0.638613758 | stable | LOC643883   |
| 0.638613758 | stable | ZNF300      |
| 0.638613758 | stable | LOC651701   |
| 0.638613758 | stable | CICK0721Q.1 |
| 0.638834517 | stable | LOC651055   |
| 0.638957754 | stable | ZNF530      |
| 0.638972655 | stable | MIP         |
| 0.638972655 | stable | OMP         |
| 0.638972655 | stable | MVK         |
| 0.638972655 | stable | LOC645974   |
| 0.639188233 | stable | CACNG8      |
| 0.639270281 | stable | C11ORF66    |
| 0.639273488 | stable | HIST1H1D    |
| 0.639505923 | stable | KIAA1545    |
| 0.639518289 | stable | FPGS        |
| 0.639832728 | stable | LOC652742   |
| 0.639832728 | stable | TIMM17A     |
| 0.639832728 | stable | CCNB1       |
| 0.639837823 | stable | LOC400388   |
| 0.639943293 | stable | FLJ42842    |
| 0.639955609 | stable | RPP38       |
| 0.64000323  | stable | LOC650659   |
| 0.64000323  | stable | VHLL        |
| 0.64000323  | stable | HIST1H3G    |
| 0.64000323  | stable | LOC642864   |
| 0.64000876  | stable | SYCP3       |
| 0.640047733 | stable | WDR49       |
| 0.640321722 | stable | SEMA6A      |
| 0.640345543 | stable | TALDO1      |
| 0.640345543 | stable | LOC653773   |
| 0.640347374 | stable | LOC653715   |
| 0.640609995 | stable | LOC644638   |
| 0.640609995 | stable | MED13L      |
| 0.640628991 | stable | LOC647844   |
| 0.640849064 | stable | CCDC57      |
| 0.640849064 | stable | LOC642134   |
| 0.640849064 | stable | P2RX3       |
| 0.641016589 | stable | LOC652437   |
| 0.641021404 | stable | ABCA6       |
| 0.641055747 | stable | LHFPL5      |
| 0.641055747 | stable | GBP3        |
| 0.641055747 | stable | ADAMTS10    |
| 0.641055747 | stable | CLIC5       |

## DEG.infomation

|             |        |           |
|-------------|--------|-----------|
| 0.641055747 | stable | ZBTB1     |
| 0.641055747 | stable | LRP2BP    |
| 0.641055747 | stable | C9ORF62   |
| 0.641055747 | stable | NCR1      |
| 0.641099451 | stable | CCNA2     |
| 0.641214915 | stable | SIRT2     |
| 0.641282541 | stable | MMRN2     |
| 0.641346073 | stable | LOC641834 |
| 0.641404531 | stable | WFS1      |
| 0.641404531 | stable | LOC391004 |
| 0.641404531 | stable | LOC652508 |
| 0.641404531 | stable | CSAG2     |
| 0.641404531 | stable | LOC643958 |
| 0.641404531 | stable | SYT9      |
| 0.641404531 | stable | SLC16A11  |
| 0.641404531 | stable | LOC651952 |
| 0.641404531 | stable | LOC732107 |
| 0.641464522 | stable | LOC649635 |
| 0.641466063 | stable | CERK      |
| 0.641542005 | stable | LOC644295 |
| 0.641542005 | stable | LOC348021 |
| 0.641544317 | stable | FABP5L7   |
| 0.64157277  | stable | TMEM61    |
| 0.641674893 | stable | TREH      |
| 0.641674893 | stable | TRIM40    |
| 0.641674893 | stable | LOC643325 |
| 0.64169611  | stable | ENTPD8    |
| 0.64177872  | stable | HBG2      |
| 0.641918492 | stable | LENG8     |
| 0.641978775 | stable | FLJ32682  |
| 0.641978775 | stable | NKX2-6    |
| 0.641978775 | stable | USP36     |
| 0.641978775 | stable | LOC646381 |
| 0.641978775 | stable | ANKS1A    |
| 0.641986597 | stable | LOC729487 |
| 0.641986597 | stable | LOC647275 |
| 0.641995966 | stable | PRPF38B   |
| 0.641995966 | stable | RBM42     |
| 0.641995966 | stable | C20ORF114 |
| 0.641995966 | stable | LOC644404 |
| 0.641995966 | stable | TET2      |
| 0.642046342 | stable | ATXN7     |
| 0.642151257 | stable | ACSM4     |
| 0.642151257 | stable | LOC644912 |
| 0.642151257 | stable | LOC391859 |
| 0.642181691 | stable | NUBP2     |
| 0.642243099 | stable | LOC645721 |
| 0.642243099 | stable | UBASH3A   |
| 0.642243099 | stable | LOC652879 |
| 0.642309676 | stable | LOC642105 |
| 0.642353642 | stable | KCTD4     |

## DEG.infomation

|             |        |           |
|-------------|--------|-----------|
| 0.642353642 | stable | C10ORF61  |
| 0.642353642 | stable | LOC650761 |
| 0.642353642 | stable | LOC391037 |
| 0.642353642 | stable | LOC728534 |
| 0.642672757 | stable | LOC653305 |
| 0.642721077 | stable | LOC643936 |
| 0.642739232 | stable | LOC652533 |
| 0.642739232 | stable | TSPAN2    |
| 0.64286742  | stable | LOC653683 |
| 0.642908957 | stable | LOC650116 |
| 0.643103511 | stable | GDPD4     |
| 0.643103511 | stable | LOC645451 |
| 0.643103511 | stable | ST3GAL5   |
| 0.643313128 | stable | LAMC1     |
| 0.643500102 | stable | RDH14     |
| 0.643597004 | stable | HDAC7A    |
| 0.643602193 | stable | LOC648274 |
| 0.643629168 | stable | LOC440268 |
| 0.643629168 | stable | THSD7A    |
| 0.643774712 | stable | SH2D2A    |
| 0.643846044 | stable | LOC401914 |
| 0.643846044 | stable | PMP22CD   |
| 0.643846044 | stable | RPS6KA3   |
| 0.643846044 | stable | SLA2      |
| 0.643846044 | stable | LOC729919 |
| 0.643873002 | stable | LOC649896 |
| 0.643886724 | stable | RBM43     |
| 0.644016173 | stable | LOC643748 |
| 0.644016173 | stable | FLJ44477  |
| 0.644034646 | stable | C6ORF52   |
| 0.644040567 | stable | LOC649578 |
| 0.644040567 | stable | ZNF567    |
| 0.644040567 | stable | LOC652628 |
| 0.644073332 | stable | SLITRK1   |
| 0.644073332 | stable | C9ORF36   |
| 0.644201372 | stable | LOC646537 |
| 0.644272164 | stable | DULLARD   |
| 0.64427591  | stable | DDI2      |
| 0.644431163 | stable | LOC643055 |
| 0.644447027 | stable | RD3       |
| 0.644626063 | stable | RSRC1     |
| 0.644674575 | stable | HMX2      |
| 0.644843388 | stable | FYTTD1    |
| 0.645007012 | stable | LOC730340 |
| 0.645007012 | stable | LDHAL6A   |
| 0.645007012 | stable | EPB41L4A  |
| 0.645007012 | stable | LOC652792 |
| 0.645007012 | stable | LOC642681 |
| 0.645007012 | stable | FFAR3     |
| 0.645007012 | stable | OR4C12    |
| 0.645007012 | stable | LOC730833 |

## DEG.infomation

|             |        |           |
|-------------|--------|-----------|
| 0.645007012 | stable | LOC647666 |
| 0.645022388 | stable | OCM       |
| 0.645022388 | stable | DPYSL2    |
| 0.64518888  | stable | EVPL      |
| 0.645485466 | stable | LOC649397 |
| 0.645966108 | stable | LOC400221 |
| 0.645970433 | stable | GPR39     |
| 0.645973637 | stable | LOC651896 |
| 0.646138549 | stable | GGT7      |
| 0.64621017  | stable | C9ORF110  |
| 0.64621017  | stable | NUF2      |
| 0.64621017  | stable | LOC644690 |
| 0.64621017  | stable | LOC392467 |
| 0.64621017  | stable | LOC644607 |
| 0.64621017  | stable | LOC642340 |
| 0.646445804 | stable | LOC649443 |
| 0.646455846 | stable | FAM26A    |
| 0.646469607 | stable | D21S2056E |
| 0.646469607 | stable | C1ORF111  |
| 0.646515523 | stable | ZNF780A   |
| 0.646515523 | stable | FLJ44815  |
| 0.646649841 | stable | C20ORF123 |
| 0.646716494 | stable | TNFSF18   |
| 0.646748676 | stable | LOC440013 |
| 0.646752356 | stable | LOC646604 |
| 0.646860451 | stable | LOC729355 |
| 0.646914962 | stable | AFF2      |
| 0.646914962 | stable | MS4A10    |
| 0.646914962 | stable | LOC651760 |
| 0.647048602 | stable | FOXR1     |
| 0.647048602 | stable | TMEM127   |
| 0.647069165 | stable | LOC652448 |
| 0.647111377 | stable | ZNF44     |
| 0.647117712 | stable | CCDC38    |
| 0.647129321 | stable | LOC401923 |
| 0.647228387 | stable | LOC650459 |
| 0.64725027  | stable | ACRV1     |
| 0.647315766 | stable | LOC653582 |
| 0.647364983 | stable | ZNF286A   |
| 0.64743893  | stable | FOXF1     |
| 0.647726985 | stable | LOC150577 |
| 0.648167852 | stable | KRT4      |
| 0.648597764 | stable | FLJ34047  |
| 0.648726414 | stable | LOC731283 |
| 0.648829677 | stable | MAGOHB    |
| 0.648829677 | stable | LOC653380 |
| 0.648829677 | stable | ESRRG     |
| 0.648829677 | stable | ARHGAP27  |
| 0.648829677 | stable | C20ORF118 |
| 0.648829677 | stable | LOC648438 |
| 0.648829677 | stable | IL28RA    |

## DEG.infomation

|             |        |              |
|-------------|--------|--------------|
| 0.648835734 | stable | VSTM2        |
| 0.648857026 | stable | GTF2A1L      |
| 0.648910195 | stable | TRAF1        |
| 0.648950603 | stable | UBE2NL       |
| 0.648950603 | stable | RPH3AL       |
| 0.648950603 | stable | SAMD4B       |
| 0.64931168  | stable | LOC650180    |
| 0.649532291 | stable | LOC643203    |
| 0.649532291 | stable | PTH          |
| 0.649638054 | stable | VSX1         |
| 0.649638054 | stable | LOC645306    |
| 0.649638054 | stable | MAGEB18      |
| 0.649813978 | stable | PIP5KL1      |
| 0.649813978 | stable | SLC26A7      |
| 0.649823467 | stable | LOC649073    |
| 0.649823467 | stable | GPRC5B       |
| 0.650033007 | stable | KIAA2026     |
| 0.650034816 | stable | GNG2         |
| 0.650056488 | stable | KRT20        |
| 0.650162232 | stable | DCI          |
| 0.650162232 | stable | MEGF10       |
| 0.650162232 | stable | C15ORF51     |
| 0.650162232 | stable | C12ORF67     |
| 0.650162232 | stable | FLJ45964     |
| 0.650162232 | stable | DIAPH2       |
| 0.650162232 | stable | LSM6         |
| 0.65029276  | stable | LOC647156    |
| 0.650376048 | stable | LOC643563    |
| 0.650376048 | stable | PCNXL2       |
| 0.650376048 | stable | LOC651293    |
| 0.650376048 | stable | LOC648855    |
| 0.650408948 | stable | LOC653750    |
| 0.650408948 | stable | DNM1         |
| 0.650462996 | stable | MDFI         |
| 0.650557683 | stable | LOC727735    |
| 0.650557683 | stable | CDH10        |
| 0.650557683 | stable | OR52A5       |
| 0.650842044 | stable | UBE2R2       |
| 0.650909166 | stable | LOC646864    |
| 0.650909166 | stable | LARS         |
| 0.650909166 | stable | GALNAC4S-6ST |
| 0.650995018 | stable | LOC641785    |
| 0.651090663 | stable | ARL8A        |
| 0.651104846 | stable | LOC646011    |
| 0.651104846 | stable | BRAF         |
| 0.651104846 | stable | LOC643261    |
| 0.651217194 | stable | LOC220416    |
| 0.651343427 | stable | MPZL3        |
| 0.651343427 | stable | FCHSD2       |
| 0.651350862 | stable | MMP17        |
| 0.651372337 | stable | HTR4         |



DEG.infomation

|             |        |           |
|-------------|--------|-----------|
| 0.651415665 | stable | LOC647726 |
| 0.651628758 | stable | AKAP10    |
| 0.651696185 | stable | LOC647480 |
| 0.651696185 | stable | LOC650468 |
| 0.651848232 | stable | LOC648732 |
| 0.651862152 | stable | LOC649856 |
| 0.651862152 | stable | LOC650922 |
| 0.651862152 | stable | FGF8      |
| 0.651867713 | stable | DNAHL1    |
| 0.651867713 | stable | IL31RA    |
| 0.651960664 | stable | SLC39A12  |
| 0.651960664 | stable | TIFA      |
| 0.651960664 | stable | NLGN4X    |
| 0.652102223 | stable | NAF1      |
| 0.652317119 | stable | PYGO2     |
| 0.652471653 | stable | RSL1D1    |
| 0.652557687 | stable | SERPINB13 |
| 0.652648831 | stable | LOC642014 |
| 0.652696965 | stable | LOC169834 |
| 0.652696965 | stable | KCNK18    |
| 0.652699039 | stable | OR5F1     |
| 0.652699039 | stable | SLC18A2   |
| 0.652728404 | stable | LOC729973 |
| 0.652728404 | stable | LOC648556 |
| 0.652751881 | stable | C8ORF30A  |
| 0.652751881 | stable | LOC650200 |
| 0.652826348 | stable | GRAP2     |
| 0.652955874 | stable | PKHD1L1   |
| 0.65304749  | stable | KLK14     |
| 0.65304749  | stable | LOC643194 |
| 0.653091902 | stable | MUC6      |
| 0.653146748 | stable | ANKRD20B  |
| 0.65333624  | stable | LOC390483 |
| 0.653400471 | stable | LOC642366 |
| 0.653400471 | stable | LOC389031 |
| 0.653419857 | stable | ZBTB8     |
| 0.653534449 | stable | LOC654096 |
| 0.653704763 | stable | PTPN9     |
| 0.65371819  | stable | LOC643441 |
| 0.653761314 | stable | LOC643142 |
| 0.653761314 | stable | CDK5R2    |
| 0.653761314 | stable | JARID1A   |
| 0.653761314 | stable | EXOSC8    |
| 0.653761314 | stable | TTY13     |
| 0.653786094 | stable | LOC652191 |
| 0.653786094 | stable | LOC651576 |
| 0.653786094 | stable | LOC651959 |
| 0.653797646 | stable | PRSS12    |
| 0.653854414 | stable | PRR17     |
| 0.653889549 | stable | LOC644105 |
| 0.653944813 | stable | CDC2L5    |

DEG.infomation

|             |        |               |
|-------------|--------|---------------|
| 0.653944813 | stable | LOC646552     |
| 0.653944813 | stable | NDRG4         |
| 0.654076227 | stable | FNDC3A        |
| 0.65412205  | stable | LOC650029     |
| 0.65412205  | stable | P2RX6P        |
| 0.654221756 | stable | LOC642033     |
| 0.654221756 | stable | GLP1R         |
| 0.654319825 | stable | IL1F9         |
| 0.654319825 | stable | HOXA11        |
| 0.654339405 | stable | LOC653234     |
| 0.654373544 | stable | AGR2          |
| 0.654401784 | stable | ADAD1         |
| 0.654401784 | stable | DMGDH         |
| 0.654401784 | stable | C14ORF1       |
| 0.654565515 | stable | LOC650285     |
| 0.654565515 | stable | LRRC8E        |
| 0.654588753 | stable | ZNF663        |
| 0.654630286 | stable | LOC340549     |
| 0.654630286 | stable | CLDN3         |
| 0.65467022  | stable | ADCY5         |
| 0.65467022  | stable | C10ORF72      |
| 0.654702558 | stable | LOC338328     |
| 0.654782658 | stable | FAM22F        |
| 0.654891971 | stable | CRIM2         |
| 0.654913559 | stable | MOBKL1A       |
| 0.654913559 | stable | WFDC5         |
| 0.655110839 | stable | SPATA17       |
| 0.655212135 | stable | PCDHGA3       |
| 0.655212135 | stable | LOC389124     |
| 0.655212135 | stable | SEC23A        |
| 0.655212135 | stable | C19ORF57      |
| 0.655212135 | stable | IL2RB         |
| 0.655246431 | stable | KIAA0738      |
| 0.655246431 | stable | LOC653261     |
| 0.655404637 | stable | OR4N5         |
| 0.655404637 | stable | LOC645671     |
| 0.655404637 | stable | LOC642361     |
| 0.655404637 | stable | ONECUT3       |
| 0.655455646 | stable | DKFZP779B1634 |
| 0.655481378 | stable | CXORF61       |
| 0.655481378 | stable | CEP170L       |
| 0.655767244 | stable | SLC26A2       |
| 0.65592623  | stable | LOC654085     |
| 0.656047899 | stable | SH3MD4        |
| 0.656047899 | stable | DMRTB1        |
| 0.65620424  | stable | GP2           |
| 0.65620424  | stable | SNTG2         |
| 0.656399033 | stable | TRIP10        |
| 0.656407967 | stable | LOC653051     |
| 0.656407967 | stable | LOC648189     |
| 0.656407967 | stable | FLJ42418      |

## DEG.infomation

|             |        |           |
|-------------|--------|-----------|
| 0.656508491 | stable | ADAM29    |
| 0.656602002 | stable | LOC728734 |
| 0.656806363 | stable | DMBT1     |
| 0.656806363 | stable | INOC1     |
| 0.656806363 | stable | C10ORF31  |
| 0.65682567  | stable | LIPE      |
| 0.656859757 | stable | LOC652843 |
| 0.656945711 | stable | SYNE1     |
| 0.656945711 | stable | PDC       |
| 0.656945711 | stable | LOC643275 |
| 0.656945711 | stable | LOC642120 |
| 0.65697094  | stable | PCDHB14   |
| 0.65697094  | stable | LOC652226 |
| 0.657190292 | stable | SSSCA1    |
| 0.657387047 | stable | CHTF18    |
| 0.657568762 | stable | KLHL15    |
| 0.657569243 | stable | TPRG1     |
| 0.657660154 | stable | LOC645088 |
| 0.657660154 | stable | TMPO      |
| 0.657691942 | stable | C2ORF78   |
| 0.657724773 | stable | LOC654208 |
| 0.657724773 | stable | MED26     |
| 0.657989434 | stable | LOC649486 |
| 0.658165271 | stable | ING1      |
| 0.658165271 | stable | WDTC1     |
| 0.658165271 | stable | IGF2      |
| 0.658287007 | stable | MAPK11    |
| 0.658447876 | stable | PIH1D2    |
| 0.658629996 | stable | LOC644133 |
| 0.658672276 | stable | C6ORF107  |
| 0.658699208 | stable | LOC342979 |
| 0.658711646 | stable | NOM1      |
| 0.658720417 | stable | LOC651621 |
| 0.658720417 | stable | LOC653937 |
| 0.658758206 | stable | LEFTY1    |
| 0.658888074 | stable | LOC727944 |
| 0.658942999 | stable | LAGE3     |
| 0.659229016 | stable | LOC645789 |
| 0.659357762 | stable | LOC641767 |
| 0.659522469 | stable | FREM2     |
| 0.660034427 | stable | TNXB      |
| 0.660104652 | stable | ZNF622    |
| 0.660104652 | stable | LOC643357 |
| 0.660391    | stable | LOC399753 |
| 0.660434409 | stable | LOC651427 |
| 0.660450965 | stable | LOC440157 |
| 0.660502547 | stable | LOC648343 |
| 0.660519618 | stable | ELAVL1    |
| 0.660519618 | stable | LOC649125 |
| 0.660519618 | stable | LOC642140 |
| 0.660750758 | stable | PPP2R5E   |

## DEG.infomation

|             |        |           |
|-------------|--------|-----------|
| 0.660803583 | stable | LOC642119 |
| 0.660803583 | stable | SLC12A3   |
| 0.660803583 | stable | LOC645745 |
| 0.660803583 | stable | DPY19L2P2 |
| 0.660803583 | stable | SP1       |
| 0.660803583 | stable | CEP164    |
| 0.660863921 | stable | DUX1      |
| 0.661229696 | stable | LOC647407 |
| 0.661336089 | stable | CANX      |
| 0.661336089 | stable | SIRT6     |
| 0.661409527 | stable | TFEC      |
| 0.661409527 | stable | SUNC1     |
| 0.661454052 | stable | PCDHB6    |
| 0.661515922 | stable | GPR77     |
| 0.661605547 | stable | LOC648897 |
| 0.661654224 | stable | LOC642849 |
| 0.661749492 | stable | LOC344875 |
| 0.661749492 | stable | CENTD3    |
| 0.661749492 | stable | DLEC1     |
| 0.661749492 | stable | FLJ20581  |
| 0.661749492 | stable | AGC1      |
| 0.66204358  | stable | FAM47C    |
| 0.662233787 | stable | LOC389120 |
| 0.66225298  | stable | USH1C     |
| 0.66225298  | stable | POU3F4    |
| 0.662443485 | stable | LOC286094 |
| 0.662443485 | stable | C13ORF35  |
| 0.662443485 | stable | FOXN3     |
| 0.662531339 | stable | ZNF829    |
| 0.662536683 | stable | C5ORF21   |
| 0.662640734 | stable | GAGE5     |
| 0.662717429 | stable | LRRN2     |
| 0.662721889 | stable | LOC641522 |
| 0.662784166 | stable | ERC2      |
| 0.662850843 | stable | SNX2      |
| 0.662850843 | stable | LOC644524 |
| 0.663271861 | stable | GEMIN7    |
| 0.663400008 | stable | LOC648659 |
| 0.663400008 | stable | SEPT14    |
| 0.663668901 | stable | OPN5      |
| 0.663668901 | stable | GCM2      |
| 0.663668901 | stable | GPR179    |
| 0.663668901 | stable | SWAP70    |
| 0.663728113 | stable | SPINK8    |
| 0.663782903 | stable | CDC25A    |
| 0.663782903 | stable | LOC648751 |
| 0.663800716 | stable | LOC400578 |
| 0.663958848 | stable | SPATA16   |
| 0.664430081 | stable | C1ORF201  |
| 0.664430081 | stable | LOC643397 |
| 0.664430081 | stable | LOC387683 |

DEG.infomation

|             |        |              |
|-------------|--------|--------------|
| 0.664430081 | stable | SNORD30      |
| 0.664430081 | stable | TRHDE        |
| 0.664430081 | stable | SSX2         |
| 0.664430081 | stable | TXNDC8       |
| 0.66451481  | stable | WDR52        |
| 0.664632976 | stable | OR8H1        |
| 0.664706234 | stable | LOC285735    |
| 0.664706234 | stable | C19ORF29     |
| 0.664706234 | stable | LOC440407    |
| 0.664737658 | stable | LOC647742    |
| 0.664737658 | stable | LOC649965    |
| 0.664737658 | stable | HSD3B2       |
| 0.664737658 | stable | LOC652324    |
| 0.664737658 | stable | MLLT3        |
| 0.664737658 | stable | LOC645287    |
| 0.664737658 | stable | LOC644944    |
| 0.665102367 | stable | LOC642740    |
| 0.665102367 | stable | LOC645682    |
| 0.66519246  | stable | C1ORF67      |
| 0.665319862 | stable | KIAA0146     |
| 0.665319862 | stable | HTN3         |
| 0.665319862 | stable | MARCH4       |
| 0.665338417 | stable | PTER         |
| 0.665378772 | stable | EGR3         |
| 0.665437168 | stable | CHCHD9       |
| 0.665515962 | stable | LOC644224    |
| 0.665758789 | stable | LOC647891    |
| 0.665842523 | stable | MAP9         |
| 0.665873827 | stable | CTAG2        |
| 0.665873827 | stable | RAVER2       |
| 0.665873827 | stable | ARL9         |
| 0.665939399 | stable | KIAA0174     |
| 0.665963001 | stable | TACSTD1      |
| 0.66603201  | stable | KRTAP11-1    |
| 0.66603201  | stable | RNF138P1     |
| 0.666066783 | stable | OR11G2       |
| 0.666066783 | stable | FAM20B       |
| 0.666066783 | stable | LOC648481    |
| 0.666066783 | stable | STK31        |
| 0.666066783 | stable | KLHDC7B      |
| 0.666066783 | stable | FLJ90036     |
| 0.666066783 | stable | CACNA1F      |
| 0.666341026 | stable | LOC648054    |
| 0.666358895 | stable | DKFZP564C196 |
| 0.666537762 | stable | LOC652139    |
| 0.666713063 | stable | IRGC         |
| 0.66677288  | stable | APOBEC4      |
| 0.666782858 | stable | LOC729260    |
| 0.666782858 | stable | ID4          |
| 0.666782858 | stable | BOLL         |
| 0.66682241  | stable | LOC729476    |

DEG.infomation

|             |        |           |
|-------------|--------|-----------|
| 0.666825757 | stable | FLJ37673  |
| 0.66682973  | stable | LOC255187 |
| 0.666879335 | stable | LOC120824 |
| 0.666908781 | stable | SLC39A2   |
| 0.666992739 | stable | FLJ36116  |
| 0.666992739 | stable | TRPM3     |
| 0.667311135 | stable | TOP1P1    |
| 0.667398256 | stable | LOC649452 |
| 0.667398256 | stable | ABI1      |
| 0.667497723 | stable | LOC651454 |
| 0.667747821 | stable | LOC644689 |
| 0.667789268 | stable | PEX14     |
| 0.667809914 | stable | LOC648668 |
| 0.667810635 | stable | SGK3      |
| 0.66791738  | stable | LOC650638 |
| 0.667991324 | stable | PZP       |
| 0.668079767 | stable | AHCYL2    |
| 0.66814134  | stable | LOC651886 |
| 0.668155958 | stable | LOC441378 |
| 0.668155958 | stable | LOC653219 |
| 0.668155958 | stable | ZIC4      |
| 0.668155958 | stable | LOC652679 |
| 0.668155958 | stable | LOC731496 |
| 0.668155958 | stable | OR10G3    |
| 0.668155958 | stable | LOC645995 |
| 0.668155958 | stable | C3ORF46   |
| 0.668327751 | stable | NLRP10    |
| 0.668425163 | stable | ZNF509    |
| 0.66843395  | stable | C14ORF178 |
| 0.66843395  | stable | PDF       |
| 0.66843395  | stable | MGC10997  |
| 0.66848202  | stable | LOC284441 |
| 0.66848202  | stable | GUCA2B    |
| 0.66848202  | stable | LOC650823 |
| 0.66860157  | stable | DSP       |
| 0.66860758  | stable | LOC644592 |
| 0.668682382 | stable | MTDH      |
| 0.668754959 | stable | LOC440082 |
| 0.668866026 | stable | CTAG1B    |
| 0.668947125 | stable | CADM2     |
| 0.669001692 | stable | RCOR1     |
| 0.669017771 | stable | WFDC10B   |
| 0.669017771 | stable | LARP2     |
| 0.669068834 | stable | IGHMBP2   |
| 0.669147552 | stable | ZPBP      |
| 0.669280505 | stable | LOC647509 |
| 0.669280505 | stable | PRMT8     |
| 0.669334893 | stable | MCART6    |
| 0.669431019 | stable | UTP3      |
| 0.669431019 | stable | LOC347411 |
| 0.669433772 | stable | LOC653555 |

DEG.infomation

|             |        |              |
|-------------|--------|--------------|
| 0.669670528 | stable | LOC653562    |
| 0.669670528 | stable | RNF12        |
| 0.669670528 | stable | LOC402715    |
| 0.669670528 | stable | ZNF304       |
| 0.669781594 | stable | ZNF470       |
| 0.669781594 | stable | LOC149950    |
| 0.669857055 | stable | DPRXP4       |
| 0.669857055 | stable | EIF2S1       |
| 0.670035589 | stable | ZNF75D       |
| 0.670065739 | stable | WBSCR19      |
| 0.670065739 | stable | PIP4K2C      |
| 0.670221359 | stable | CCDC58       |
| 0.670489401 | stable | LOC646829    |
| 0.670489401 | stable | CHRN1        |
| 0.670489401 | stable | LOC645662    |
| 0.670877004 | stable | KMO          |
| 0.670926727 | stable | KLK2         |
| 0.670926727 | stable | C1ORF99      |
| 0.670926727 | stable | LOC642109    |
| 0.671052519 | stable | CUL2         |
| 0.671052519 | stable | LOC653514    |
| 0.671072186 | stable | C9ORF109     |
| 0.671369053 | stable | DKFZP434P211 |
| 0.671420796 | stable | MGC35440     |
| 0.671802855 | stable | USP43        |
| 0.671802855 | stable | EPS8L3       |
| 0.671814792 | stable | LOC650323    |
| 0.671814792 | stable | C9ORF135     |
| 0.671814792 | stable | ZNF70        |
| 0.671915977 | stable | GNRHR        |
| 0.671955784 | stable | ZCCHC10      |
| 0.671955784 | stable | LOC643429    |
| 0.671955784 | stable | LOC648629    |
| 0.672018701 | stable | LATS1        |
| 0.672058173 | stable | LOC653746    |
| 0.672058173 | stable | FFAR1        |
| 0.672087696 | stable | RAB9P1       |
| 0.672194407 | stable | MAP3K10      |
| 0.672244141 | stable | TRPM2        |
| 0.67231671  | stable | CHKA         |
| 0.67256781  | stable | LOC649891    |
| 0.672634986 | stable | LOC400759    |
| 0.672634986 | stable | CLEC4M       |
| 0.672634986 | stable | GREM2        |
| 0.672706876 | stable | C17ORF78     |
| 0.672706876 | stable | LOC649280    |
| 0.672706876 | stable | LOC643920    |
| 0.672706876 | stable | TAS2R7       |
| 0.672706876 | stable | LOC441050    |
| 0.672706876 | stable | OR2C1        |
| 0.672706876 | stable | LIG4         |

## DEG.infomation

|             |        |           |
|-------------|--------|-----------|
| 0.672706876 | stable | LOC644499 |
| 0.672706876 | stable | LOC644748 |
| 0.672761455 | stable | LOC645165 |
| 0.672812913 | stable | FLJ40288  |
| 0.672812913 | stable | OR8U8     |
| 0.672894767 | stable | FLJ20464  |
| 0.672989852 | stable | BRD1      |
| 0.672994927 | stable | GNAT3     |
| 0.673174466 | stable | PNPLA5    |
| 0.673236431 | stable | GRM6      |
| 0.673236431 | stable | LOC652798 |
| 0.673236431 | stable | NDUFA3    |
| 0.673296318 | stable | LOC390387 |
| 0.673296318 | stable | DLGAP3    |
| 0.673595979 | stable | KLF5      |
| 0.673778628 | stable | FOXN1     |
| 0.673778628 | stable | LOC645655 |
| 0.673778628 | stable | SLAMF7    |
| 0.673945895 | stable | LOC653297 |
| 0.673945895 | stable | LOC728012 |
| 0.673945895 | stable | SLC7A9    |
| 0.673945895 | stable | WSCD1     |
| 0.673945895 | stable | LPP       |
| 0.674023334 | stable | LOC284428 |
| 0.674103754 | stable | LOC441362 |
| 0.674174212 | stable | LOC400301 |
| 0.6742201   | stable | LAMP2     |
| 0.674319341 | stable | LOC642426 |
| 0.674330287 | stable | MACROD1   |
| 0.674546259 | stable | HIST1H2AJ |
| 0.674546259 | stable | JRK       |
| 0.674897401 | stable | PSCD2     |
| 0.674897401 | stable | SFRS3     |
| 0.674897401 | stable | TBRG1     |
| 0.674897401 | stable | LOC649416 |
| 0.674897401 | stable | TCP11     |
| 0.674897401 | stable | PDPK1     |
| 0.674897401 | stable | CUL7      |
| 0.674897401 | stable | PCDHAC2   |
| 0.674897401 | stable | OR9Q1     |
| 0.674897401 | stable | TPPP2     |
| 0.674897401 | stable | KIAA1210  |
| 0.674897401 | stable | OR13C5    |
| 0.675003633 | stable | SPINT2    |
| 0.675036062 | stable | FLJ40296  |
| 0.675064346 | stable | PGPEP1    |
| 0.675461274 | stable | PCID2     |
| 0.675562269 | stable | LOC402571 |
| 0.675562269 | stable | LOC647163 |
| 0.67567417  | stable | ALG12     |
| 0.675724507 | stable | SAMD6     |



## DEG.infomation

|             |        |           |
|-------------|--------|-----------|
| 0.675724507 | stable | EAF1      |
| 0.675724507 | stable | LOC651635 |
| 0.675724507 | stable | LOC651186 |
| 0.675724507 | stable | FAM83H    |
| 0.675780425 | stable | HORMAD1   |
| 0.675942232 | stable | PPIE      |
| 0.675942232 | stable | LOC644504 |
| 0.676072154 | stable | C11ORF61  |
| 0.676072154 | stable | ZFP14     |
| 0.676091045 | stable | KCND1     |
| 0.676231711 | stable | ARHGAP20  |
| 0.676234876 | stable | IMAA      |
| 0.676300435 | stable | TREML4    |
| 0.676488548 | stable | GDI1      |
| 0.676535723 | stable | UBR7      |
| 0.676535952 | stable | RPS3A     |
| 0.676603889 | stable | MEF2B     |
| 0.67668314  | stable | CLINT1    |
| 0.67668314  | stable | LOC648394 |
| 0.67668314  | stable | RIG       |
| 0.676792167 | stable | EXOC3L2   |
| 0.676792167 | stable | INTS3     |
| 0.676916879 | stable | LOC647869 |
| 0.676916879 | stable | LOC653105 |
| 0.6769263   | stable | LOC646448 |
| 0.6769263   | stable | LOC649768 |
| 0.676942529 | stable | LOC283551 |
| 0.676980032 | stable | LOC389316 |
| 0.677021805 | stable | LOC441376 |
| 0.677052352 | stable | LOC731159 |
| 0.677443392 | stable | LOC645444 |
| 0.677550382 | stable | WDR38     |
| 0.677789557 | stable | ZBED2     |
| 0.677818331 | stable | LOC643461 |
| 0.677874696 | stable | ZNF692    |
| 0.678066407 | stable | LOC652082 |
| 0.67849329  | stable | MYO1A     |
| 0.678513212 | stable | PRSSL1    |
| 0.67854658  | stable | RDH11     |
| 0.67854658  | stable | LOC649374 |
| 0.67854658  | stable | LOC645635 |
| 0.67854658  | stable | LOC653515 |
| 0.678636277 | stable | NTNG1     |
| 0.678636277 | stable | LOC645755 |
| 0.678701414 | stable | PGK2      |
| 0.678721286 | stable | LOC652801 |
| 0.678896448 | stable | ADAM19    |
| 0.679017953 | stable | LOC342346 |
| 0.679017953 | stable | SERPINB9  |
| 0.679017953 | stable | RASEF     |
| 0.679036089 | stable | NPC1L1    |

## DEG.infomation

|             |        |           |
|-------------|--------|-----------|
| 0.679036089 | stable | FGF20     |
| 0.679050789 | stable | LOC644993 |
| 0.679050789 | stable | LOC730713 |
| 0.679059929 | stable | HOXB13    |
| 0.679243358 | stable | LOC648735 |
| 0.679290967 | stable | LOC730704 |
| 0.679290967 | stable | SLC10A5   |
| 0.679327122 | stable | VPS4A     |
| 0.679327122 | stable | OVGP1     |
| 0.679327122 | stable | LOC375323 |
| 0.679493587 | stable | ALDH3A1   |
| 0.679719859 | stable | LOC653257 |
| 0.679815117 | stable | LOC642480 |
| 0.679824414 | stable | LOC346950 |
| 0.679824414 | stable | LOC650253 |
| 0.679824414 | stable | LOC647323 |
| 0.679824414 | stable | LOC653492 |
| 0.679824414 | stable | DEFB110   |
| 0.679824414 | stable | NUP214    |
| 0.679824414 | stable | LOC648998 |
| 0.67983688  | stable | HELT      |
| 0.680063429 | stable | TTC36     |
| 0.680063429 | stable | OR2T4     |
| 0.680073481 | stable | LAMA1     |
| 0.680154957 | stable | LOC652067 |
| 0.680296055 | stable | C16ORF71  |
| 0.6804163   | stable | LOC642736 |
| 0.6804163   | stable | ELA3A     |
| 0.6804163   | stable | NUDT19    |
| 0.680510285 | stable | ATXN7L2   |
| 0.680524821 | stable | LOC440944 |
| 0.680586725 | stable | HNRPA2B1  |
| 0.680692066 | stable | LOC652495 |
| 0.680696956 | stable | NLRP13    |
| 0.680719019 | stable | MGC15634  |
| 0.680719019 | stable | SERPINB12 |
| 0.680719019 | stable | ADAMTS6   |
| 0.680813055 | stable | LOC642093 |
| 0.680824572 | stable | CRYGC     |
| 0.680886786 | stable | WDR90     |
| 0.680962503 | stable | LOC392559 |
| 0.680962503 | stable | LOC649886 |
| 0.680962503 | stable | FLJ16165  |
| 0.681046234 | stable | LOC642216 |
| 0.681046234 | stable | LOC649383 |
| 0.681049374 | stable | MYH1      |
| 0.681049374 | stable | ZNF238    |
| 0.681049374 | stable | LOC730344 |
| 0.681293186 | stable | KRTAP8-1  |
| 0.681559041 | stable | TMPRSS4   |
| 0.681782881 | stable | TXNDC11   |

## DEG.infomation

|             |        |           |
|-------------|--------|-----------|
| 0.681804596 | stable | LOC441344 |
| 0.681804596 | stable | LOC646365 |
| 0.681815035 | stable | OR8I2     |
| 0.681815035 | stable | NUBPL     |
| 0.681815035 | stable | LOC653314 |
| 0.681815035 | stable | LOC647741 |
| 0.681994379 | stable | FBXO17    |
| 0.682117551 | stable | FLJ43870  |
| 0.682126111 | stable | FAM76A    |
| 0.682128918 | stable | PRAMEF17  |
| 0.682141017 | stable | PON3      |
| 0.682311959 | stable | CART1     |
| 0.682316859 | stable | ZFP95     |
| 0.682345113 | stable | LOC150786 |
| 0.682345113 | stable | LOC642514 |
| 0.682345113 | stable | TECTB     |
| 0.682345113 | stable | FAM89B    |
| 0.682345113 | stable | C2ORF61   |
| 0.682345113 | stable | KIAA0492  |
| 0.682345113 | stable | DNHD1     |
| 0.682345113 | stable | LOC645818 |
| 0.682345113 | stable | LOC654203 |
| 0.682484109 | stable | C5ORF32   |
| 0.682484109 | stable | FLJ33651  |
| 0.682501333 | stable | KIR2DS5   |
| 0.6825349   | stable | LOC646458 |
| 0.682568661 | stable | LOC642450 |
| 0.682702122 | stable | HGF       |
| 0.682873927 | stable | C4A       |
| 0.682873927 | stable | SPAG5     |
| 0.682873927 | stable | SGCD      |
| 0.682950247 | stable | VPS54     |
| 0.682950247 | stable | TARSL2    |
| 0.683101623 | stable | LOC253820 |
| 0.683149917 | stable | SERPINB11 |
| 0.683171139 | stable | CPNE2     |
| 0.683376943 | stable | PLEK2     |
| 0.683437999 | stable | PLA2G12B  |
| 0.68356538  | stable | C2ORF53   |
| 0.68358866  | stable | SPATA6    |
| 0.683796552 | stable | MYF5      |
| 0.683803734 | stable | ARPP-21   |
| 0.683806534 | stable | ABCD1     |
| 0.683817606 | stable | LOC649041 |
| 0.684012721 | stable | ZNF766    |
| 0.684082993 | stable | SFI1      |
| 0.684095064 | stable | HLA-DQA2  |
| 0.684283986 | stable | LOC644171 |
| 0.684328211 | stable | LZTS2     |
| 0.684353172 | stable | C17ORF57  |
| 0.684353172 | stable | LOC338579 |

DEG.infomation

|             |        |           |
|-------------|--------|-----------|
| 0.684462445 | stable | LOC643283 |
| 0.684618727 | stable | LOC286016 |
| 0.684828839 | stable | NEU3      |
| 0.684925113 | stable | SH3BGRL2  |
| 0.685051065 | stable | LOC644898 |
| 0.685061087 | stable | ASNSD1    |
| 0.685096925 | stable | CMTM2     |
| 0.685330232 | stable | C7ORF29   |
| 0.68536137  | stable | ABCA7     |
| 0.685361815 | stable | STIM2     |
| 0.685619363 | stable | FAM120C   |
| 0.68568299  | stable | MAP3K9    |
| 0.68568299  | stable | PLCB1     |
| 0.68568299  | stable | CST1      |
| 0.685820755 | stable | LOC652071 |
| 0.686103679 | stable | LOC400708 |
| 0.686304054 | stable | ZCCHC2    |
| 0.686354489 | stable | FGFR2     |
| 0.68645029  | stable | MGC34761  |
| 0.686557305 | stable | LOC646183 |
| 0.686699889 | stable | WIPF3     |
| 0.686699889 | stable | LOC648447 |
| 0.686699889 | stable | LOC649754 |
| 0.686699889 | stable | LOC642280 |
| 0.686699889 | stable | LOC649296 |
| 0.686829642 | stable | DYDC1     |
| 0.686925943 | stable | MAGEB3    |
| 0.686925943 | stable | ASB17     |
| 0.686937796 | stable | OR5M8     |
| 0.68694007  | stable | LOC644429 |
| 0.68694007  | stable | MGAM      |
| 0.68694007  | stable | LOC652433 |
| 0.68694007  | stable | LOC730920 |
| 0.68694007  | stable | OR5M9     |
| 0.68694007  | stable | KIF24     |
| 0.686962327 | stable | MYBPC3    |
| 0.68711322  | stable | FLJ42102  |
| 0.68711322  | stable | PSORS1C2  |
| 0.687152018 | stable | LOC646869 |
| 0.687152018 | stable | LOC391475 |
| 0.687152018 | stable | FLJ42289  |
| 0.687357333 | stable | PIB5PA    |
| 0.687411887 | stable | HS3ST5    |
| 0.687465491 | stable | LOC651729 |
| 0.687506437 | stable | RXRG      |
| 0.687506437 | stable | LOC643363 |
| 0.687570567 | stable | WHDC1     |
| 0.687570567 | stable | LOC649702 |
| 0.68761481  | stable | LOC652698 |
| 0.68761481  | stable | BLR1      |
| 0.687703158 | stable | LOC133609 |

## DEG.infomation

|             |        |           |
|-------------|--------|-----------|
| 0.68777383  | stable | LOC441931 |
| 0.687935901 | stable | CNTFR     |
| 0.688046909 | stable | DEFB126   |
| 0.688318096 | stable | KRTAP6-3  |
| 0.688318096 | stable | LOC642219 |
| 0.688318096 | stable | LOC642962 |
| 0.688369198 | stable | LOC642133 |
| 0.688426902 | stable | DNAJB7    |
| 0.688430187 | stable | LOC646280 |
| 0.688430187 | stable | INDOL1    |
| 0.688430187 | stable | PKDREJ    |
| 0.688430187 | stable | DDX53     |
| 0.688430187 | stable | KCNE3     |
| 0.688532173 | stable | LOC652548 |
| 0.68857715  | stable | LOC127011 |
| 0.688652302 | stable | LOC650861 |
| 0.688672079 | stable | C1ORF108  |
| 0.688686223 | stable | SMNDC1    |
| 0.688710149 | stable | RBM6      |
| 0.688810611 | stable | LOC653381 |
| 0.68884537  | stable | LOC644681 |
| 0.68884537  | stable | ADORA1    |
| 0.688924638 | stable | LOC653752 |
| 0.689007701 | stable | LOC645929 |
| 0.689249956 | stable | LOC441812 |
| 0.689274191 | stable | GPR153    |
| 0.689323699 | stable | LOC648972 |
| 0.689323699 | stable | CAPZA3    |
| 0.689323699 | stable | IVL       |
| 0.689362462 | stable | LOC339809 |
| 0.689386097 | stable | POU3F3    |
| 0.689386097 | stable | SUMO4     |
| 0.689386097 | stable | CLPB      |
| 0.689419438 | stable | SAA4      |
| 0.68949663  | stable | C9ORF53   |
| 0.68949663  | stable | NMS       |
| 0.689613956 | stable | TMCO5A    |
| 0.689613956 | stable | LOC649360 |
| 0.689626936 | stable | LOC728334 |
| 0.689693607 | stable | CRYBA2    |
| 0.689744676 | stable | FLJ90231  |
| 0.689744676 | stable | LOC652353 |
| 0.689755645 | stable | LOC648704 |
| 0.689779638 | stable | GDF5      |
| 0.689877854 | stable | LOC391817 |
| 0.689877998 | stable | LOC652905 |
| 0.689877998 | stable | LOC730034 |
| 0.689877998 | stable | CCDC11    |
| 0.689877998 | stable | SLC25A21  |
| 0.689877998 | stable | KRT39     |
| 0.689877998 | stable | GHRHR     |

## DEG.infomation

|             |        |           |
|-------------|--------|-----------|
| 0.690061027 | stable | LOC647681 |
| 0.690367765 | stable | LOC646498 |
| 0.690430757 | stable | GNAS      |
| 0.690434302 | stable | CYP7A1    |
| 0.690449473 | stable | ASPRV1    |
| 0.690609561 | stable | TMEM5     |
| 0.690735144 | stable | FLJ25758  |
| 0.690856814 | stable | GLYBP     |
| 0.690856814 | stable | LOC648657 |
| 0.690928555 | stable | ZC3H5     |
| 0.691194085 | stable | LOC646990 |
| 0.691237063 | stable | PYCRL     |
| 0.691237063 | stable | C2ORF54   |
| 0.691280858 | stable | LOC649174 |
| 0.691373329 | stable | HUS1      |
| 0.691373329 | stable | LOC730809 |
| 0.691397055 | stable | FLJ33387  |
| 0.691548104 | stable | ALAD      |
| 0.691548104 | stable | LOC647003 |
| 0.691548104 | stable | LOC650373 |
| 0.691548104 | stable | LOC400768 |
| 0.691668279 | stable | BCAS1     |
| 0.691749506 | stable | ABCA9     |
| 0.691749506 | stable | LOC646363 |
| 0.691749506 | stable | LOC652213 |
| 0.691749506 | stable | RAG1      |
| 0.691749506 | stable | ADRBK1    |
| 0.691749506 | stable | LOC649853 |
| 0.691875884 | stable | FAM105A   |
| 0.691931209 | stable | C6ORF26   |
| 0.691931209 | stable | PHACTR2   |
| 0.691931209 | stable | LOC730132 |
| 0.692164066 | stable | CHPF      |
| 0.692371133 | stable | FLJ14816  |
| 0.692371133 | stable | LOC649580 |
| 0.69253505  | stable | LOC647197 |
| 0.692663288 | stable | SCN8A     |
| 0.692681872 | stable | LOC653118 |
| 0.692681872 | stable | FBXW12    |
| 0.692720196 | stable | UBE3A     |
| 0.692720196 | stable | LOC652608 |
| 0.692720196 | stable | LOC646173 |
| 0.692720196 | stable | EREG      |
| 0.692720196 | stable | UTS2      |
| 0.692761378 | stable | GLIS1     |
| 0.692771453 | stable | LOC642597 |
| 0.692870157 | stable | IFT80     |
| 0.692973972 | stable | FDX1      |
| 0.693009697 | stable | LOC646401 |
| 0.693042556 | stable | GALNT7    |
| 0.693042556 | stable | LOC440248 |

## DEG.infomation

|             |        |            |
|-------------|--------|------------|
| 0.693042556 | stable | PCYT1A     |
| 0.693042556 | stable | LOC728044  |
| 0.693042556 | stable | KRTAP1-3   |
| 0.693065558 | stable | FAU        |
| 0.693065978 | stable | LOC652599  |
| 0.693092796 | stable | PJA2       |
| 0.693092796 | stable | URG4       |
| 0.693181207 | stable | HTR3E      |
| 0.69327252  | stable | SURF6      |
| 0.693284039 | stable | LOC650392  |
| 0.693284039 | stable | OR2M3      |
| 0.693284039 | stable | COX6A1     |
| 0.693284039 | stable | CALU       |
| 0.693363624 | stable | LOC641852  |
| 0.693547909 | stable | FLJ42709   |
| 0.693754015 | stable | C1ORF32    |
| 0.693754015 | stable | OR5A1      |
| 0.693791923 | stable | LOC644091  |
| 0.693921804 | stable | ST6GALNAC2 |
| 0.694102154 | stable | C11ORF58   |
| 0.694110578 | stable | KIAA0527   |
| 0.694143024 | stable | LPIN3      |
| 0.694143024 | stable | SI         |
| 0.694143024 | stable | C22ORF34   |
| 0.694143024 | stable | NFXL1      |
| 0.694389547 | stable | PTPRJ      |
| 0.694430668 | stable | SPANXE     |
| 0.694562667 | stable | LOC155100  |
| 0.694805396 | stable | AMELY      |
| 0.695028916 | stable | RRP15      |
| 0.695098791 | stable | C6ORF118   |
| 0.69546395  | stable | LOC653052  |
| 0.69546395  | stable | MAP1D      |
| 0.69546395  | stable | LOC645489  |
| 0.695609876 | stable | MYH11      |
| 0.695617937 | stable | LOC649406  |
| 0.695786815 | stable | LOC650144  |
| 0.6958106   | stable | C21ORF41   |
| 0.696018456 | stable | LOC651467  |
| 0.696089884 | stable | ETNK1      |
| 0.696299945 | stable | HSPCAL3    |
| 0.696357662 | stable | LOC164380  |
| 0.696395741 | stable | LOC401131  |
| 0.696395741 | stable | DTL        |
| 0.696395741 | stable | ATP10B     |
| 0.696395741 | stable | LOC650436  |
| 0.696458322 | stable | PRDM1      |
| 0.696495345 | stable | LOC642769  |
| 0.696562567 | stable | PRCP       |
| 0.696660024 | stable | MAP3K3     |
| 0.696673762 | stable | PDIA3      |

## DEG.infomation

|             |        |           |
|-------------|--------|-----------|
| 0.69667904  | stable | GUSBL1    |
| 0.696695926 | stable | OR6C2     |
| 0.696804154 | stable | DACH1     |
| 0.696859731 | stable | TMEM32    |
| 0.696867875 | stable | LOC729335 |
| 0.696957056 | stable | LOC651957 |
| 0.696957056 | stable | LOC645396 |
| 0.696957056 | stable | ITGAD     |
| 0.696957056 | stable | SFRS6     |
| 0.696957056 | stable | SLC22A2   |
| 0.696957056 | stable | LOC652701 |
| 0.696957056 | stable | LOC643684 |
| 0.696984761 | stable | WDR36     |
| 0.696984761 | stable | SERPINA9  |
| 0.696984761 | stable | SF3A2     |
| 0.697059615 | stable | ACTA2     |
| 0.697064877 | stable | CHRNA2    |
| 0.697064877 | stable | SLC25A35  |
| 0.69711758  | stable | DNAH5     |
| 0.697191302 | stable | LOC652703 |
| 0.697191302 | stable | CHAD      |
| 0.697191302 | stable | DGCR8     |
| 0.697221996 | stable | AMBRA1    |
| 0.697221996 | stable | C14ORF156 |
| 0.697245544 | stable | LOC648527 |
| 0.697359418 | stable | SPO11     |
| 0.697431751 | stable | LOC151121 |
| 0.697449247 | stable | BPY2B     |
| 0.697453295 | stable | PTK6      |
| 0.697724037 | stable | LOC728094 |
| 0.697726794 | stable | RAB10     |
| 0.697754972 | stable | C6ORF94   |
| 0.697864402 | stable | LOC340511 |
| 0.697988475 | stable | FLJ36032  |
| 0.698009067 | stable | OR5D18    |
| 0.698009067 | stable | SLC17A5   |
| 0.698039771 | stable | CEPT1     |
| 0.698039771 | stable | DPP8      |
| 0.698152645 | stable | PSPN      |
| 0.698152645 | stable | GRM2      |
| 0.698212479 | stable | OR6C74    |
| 0.69827479  | stable | B3GAT2    |
| 0.698312062 | stable | STMN4     |
| 0.698312062 | stable | TREM2     |
| 0.698398238 | stable | KRTAP13-1 |
| 0.698661047 | stable | MAP3K2    |
| 0.698682936 | stable | C14ORF23  |
| 0.698752367 | stable | SERF1A    |
| 0.698817693 | stable | FRMD1     |
| 0.698817693 | stable | VPS26     |
| 0.698826608 | stable | FAM45B    |



## DEG.infomation

|             |        |               |
|-------------|--------|---------------|
| 0.698826608 | stable | DUPD1         |
| 0.698826608 | stable | RXFP4         |
| 0.698983089 | stable | LOC732275     |
| 0.698983089 | stable | C4ORF45       |
| 0.698983089 | stable | ACO2          |
| 0.698983089 | stable | DTX4          |
| 0.699034117 | stable | EXOSC5        |
| 0.699065868 | stable | CDK5RAP1      |
| 0.699137335 | stable | TNP1          |
| 0.699216404 | stable | ZNF80         |
| 0.699245414 | stable | ZG16          |
| 0.699246899 | stable | LOC649447     |
| 0.699249007 | stable | LOC650657     |
| 0.699315147 | stable | DKFZP686D0972 |
| 0.699315147 | stable | C21ORF88      |
| 0.699315147 | stable | STON1         |
| 0.699315147 | stable | SNX26         |
| 0.699315147 | stable | C6ORF185      |
| 0.699315147 | stable | LOC641738     |
| 0.699315147 | stable | LOC389300     |
| 0.699698857 | stable | LDLRAD2       |
| 0.699698857 | stable | SNHG3         |
| 0.699716735 | stable | LOC255275     |
| 0.69995577  | stable | C6ORF61       |
| 0.700002149 | stable | ACOT6         |
| 0.700002149 | stable | FAM124B       |
| 0.700157086 | stable | TSPAN14       |
| 0.700157086 | stable | PEX5L         |
| 0.700348831 | stable | B4GALNT4      |
| 0.700423801 | stable | LOC440309     |
| 0.700423801 | stable | HHLA1         |
| 0.700423801 | stable | LOC645690     |
| 0.700423801 | stable | EPHA6         |
| 0.700423801 | stable | LOC440421     |
| 0.700423801 | stable | IL13RA2       |
| 0.700423801 | stable | TUBGCP3       |
| 0.700473219 | stable | APOA5         |
| 0.700473219 | stable | SPANXN2       |
| 0.700473219 | stable | LOC90925      |
| 0.70064755  | stable | OR7G1         |
| 0.70064755  | stable | GPR26         |
| 0.700727645 | stable | BMP8A         |
| 0.700727645 | stable | LOC645401     |
| 0.700759956 | stable | PDCD1LG2      |
| 0.700769473 | stable | LOC644088     |
| 0.700987152 | stable | SHARPIN       |
| 0.701121581 | stable | MAB21L2       |
| 0.701129946 | stable | LOC284215     |
| 0.701200658 | stable | KRT81         |
| 0.701203963 | stable | LOC652416     |
| 0.70120647  | stable | C16ORF89      |

DEG.infomation

|             |        |           |
|-------------|--------|-----------|
| 0.701257847 | stable | DEFB128   |
| 0.701257847 | stable | RNF113B   |
| 0.701257847 | stable | DUX3      |
| 0.701282424 | stable | LOC651345 |
| 0.701312271 | stable | LHX5      |
| 0.701312271 | stable | OR10A6    |
| 0.701331664 | stable | FLJ35946  |
| 0.701331664 | stable | PCDHB12   |
| 0.701331664 | stable | LOC649341 |
| 0.701331664 | stable | NAALADL2  |
| 0.701331664 | stable | HTATSF1   |
| 0.701331664 | stable | C6ORF68   |
| 0.701331664 | stable | PALM2     |
| 0.701331664 | stable | KCTD2     |
| 0.701331664 | stable | PTAFR     |
| 0.701413792 | stable | PPP2R5B   |
| 0.701422081 | stable | PCDHGB7   |
| 0.701468738 | stable | FAM90A8   |
| 0.701639363 | stable | LOC651675 |
| 0.701639363 | stable | HIST1H3A  |
| 0.7017424   | stable | KRTAP5-10 |
| 0.701764037 | stable | LOC644014 |
| 0.701764037 | stable | CEACAM5   |
| 0.701806734 | stable | PCDHGA5   |
| 0.701813796 | stable | PAX3      |
| 0.701813796 | stable | SLIT1     |
| 0.701813796 | stable | LOC727787 |
| 0.701813796 | stable | LOC728003 |
| 0.701892758 | stable | TUBGCP6   |
| 0.701916956 | stable | PPP2R2C   |
| 0.701938105 | stable | TNFRSF17  |
| 0.701956676 | stable | RPL10L    |
| 0.7019704   | stable | LOC653692 |
| 0.702229826 | stable | CYLD      |
| 0.702255976 | stable | LOC645268 |
| 0.702255976 | stable | PRR5      |
| 0.702376046 | stable | GNAT2     |
| 0.70238104  | stable | LOC652669 |
| 0.702461202 | stable | TEX101    |
| 0.702518615 | stable | ZNF492    |
| 0.702528409 | stable | FAM129C   |
| 0.702539911 | stable | FLJ31222  |
| 0.702554238 | stable | SLC10A1   |
| 0.702641297 | stable | LOC645177 |
| 0.702654093 | stable | KCNJ15    |
| 0.702958421 | stable | UGT1A8    |
| 0.702958421 | stable | LOC646686 |
| 0.702969759 | stable | FLJ41352  |
| 0.702969759 | stable | LOC644629 |
| 0.703155462 | stable | LOC653411 |
| 0.703155462 | stable | OC90      |

## DEG.infomation

|             |        |           |
|-------------|--------|-----------|
| 0.703222326 | stable | LEMD1     |
| 0.703222326 | stable | LOC647943 |
| 0.703222326 | stable | LOC388458 |
| 0.703432588 | stable | UPK3B     |
| 0.703432588 | stable | PGGT1B    |
| 0.703432588 | stable | LOC646043 |
| 0.703672842 | stable | CDKN2A    |
| 0.703793731 | stable | C12ORF23  |
| 0.703793731 | stable | LOC645164 |
| 0.703939712 | stable | BHLHB4    |
| 0.704177677 | stable | LOC652854 |
| 0.704177677 | stable | LOC400095 |
| 0.704177677 | stable | LOC286310 |
| 0.704177677 | stable | OR5D13    |
| 0.704177677 | stable | MRO       |
| 0.704179456 | stable | ABHD6     |
| 0.704188196 | stable | LOC652272 |
| 0.704188196 | stable | GNPTG     |
| 0.704202373 | stable | C11ORF16  |
| 0.704401766 | stable | LOC440871 |
| 0.704401766 | stable | TGM5      |
| 0.704444071 | stable | VDAC2     |
| 0.704510705 | stable | LHX4      |
| 0.704536523 | stable | FLJ42258  |
| 0.704536523 | stable | LOC440551 |
| 0.704536523 | stable | PHC2      |
| 0.704536523 | stable | LOC441864 |
| 0.704620244 | stable | CTDSP1    |
| 0.704641583 | stable | BMP2KL    |
| 0.704641583 | stable | LOC647533 |
| 0.704678968 | stable | LOC650995 |
| 0.704678968 | stable | KIAA1529  |
| 0.704692008 | stable | HOXA10    |
| 0.70507765  | stable | SENP3     |
| 0.705161985 | stable | LOC646249 |
| 0.705371083 | stable | SPEM1     |
| 0.705627641 | stable | TJP3      |
| 0.705674068 | stable | HAAO      |
| 0.705705507 | stable | CBLN4     |
| 0.705843269 | stable | LOC283849 |
| 0.705843269 | stable | SOX10     |
| 0.705843269 | stable | KBTBD9    |
| 0.705843269 | stable | PGK1      |
| 0.705850238 | stable | DNAJC16   |
| 0.705892874 | stable | LOC643100 |
| 0.706016848 | stable | FXN       |
| 0.706040351 | stable | TCF1      |
| 0.706040351 | stable | ERMN      |
| 0.706040351 | stable | LOC653885 |
| 0.706171566 | stable | OR2H2     |
| 0.706175266 | stable | NAT11     |

## DEG.infomation

|             |        |           |
|-------------|--------|-----------|
| 0.706230796 | stable | LOC648974 |
| 0.706230796 | stable | ZFP42     |
| 0.706521599 | stable | LOC441698 |
| 0.706521599 | stable | MAST3     |
| 0.706521599 | stable | LOC388259 |
| 0.706531943 | stable | SULT2A1   |
| 0.706724803 | stable | ROPN1L    |
| 0.706738493 | stable | LELP1     |
| 0.706738493 | stable | FAM150A   |
| 0.706738493 | stable | OSTN      |
| 0.707205917 | stable | LOC647540 |
| 0.707208562 | stable | FAM133B   |
| 0.707208562 | stable | LOC642112 |
| 0.707208562 | stable | MKKS      |
| 0.707294411 | stable | L3MBTL2   |
| 0.707294411 | stable | LOC648840 |
| 0.707294411 | stable | LOC645955 |
| 0.707294411 | stable | OR52B4    |
| 0.707294411 | stable | LOC442261 |
| 0.707294411 | stable | OR2M2     |
| 0.707294411 | stable | MANEA     |
| 0.707521287 | stable | LOC653418 |
| 0.707845623 | stable | OR6C3     |
| 0.70787133  | stable | NCR3      |
| 0.70787133  | stable | FLJ37587  |
| 0.70787133  | stable | DNASE1L2  |
| 0.70787133  | stable | TADA2L    |
| 0.707901851 | stable | FLJ16793  |
| 0.707965941 | stable | WDFY1     |
| 0.707980423 | stable | LOC652456 |
| 0.707983207 | stable | ZNF77     |
| 0.708041428 | stable | BARX2     |
| 0.708081747 | stable | FABP2     |
| 0.708185155 | stable | UNQ6975   |
| 0.708185155 | stable | LOC730241 |
| 0.708185155 | stable | EXDL2     |
| 0.708185155 | stable | LOC645585 |
| 0.708185155 | stable | SLC15A4   |
| 0.708201632 | stable | HECW1     |
| 0.708202764 | stable | KIAA0100  |
| 0.708238936 | stable | LOC642497 |
| 0.708284723 | stable | LOC158825 |
| 0.708284723 | stable | LRRC36    |
| 0.708284723 | stable | LOC441233 |
| 0.708284723 | stable | CASP6     |
| 0.708284723 | stable | LOC389786 |
| 0.708284723 | stable | LOC554226 |
| 0.708346447 | stable | NUBP1     |
| 0.708503873 | stable | OR6S1     |
| 0.70856465  | stable | ERVWE1    |
| 0.708567939 | stable | NMBR      |

## DEG.infomation

|             |        |           |
|-------------|--------|-----------|
| 0.708567939 | stable | LOC644640 |
| 0.708735648 | stable | LOC652148 |
| 0.708749683 | stable | LOC732313 |
| 0.708834356 | stable | LOC652633 |
| 0.708834356 | stable | CPNE9     |
| 0.708834356 | stable | ZNF547    |
| 0.708834356 | stable | SMTNL1    |
| 0.708834356 | stable | HMP19     |
| 0.708834356 | stable | ZNF498    |
| 0.708834356 | stable | LOC644419 |
| 0.708834356 | stable | TMCO2     |
| 0.708842931 | stable | LOC374973 |
| 0.708865928 | stable | LOC652515 |
| 0.708922495 | stable | SLC16A10  |
| 0.709119929 | stable | LOC650887 |
| 0.709119929 | stable | LOC652034 |
| 0.709119929 | stable | LOC646110 |
| 0.709174733 | stable | OR7G2     |
| 0.709174733 | stable | LNx1      |
| 0.709262387 | stable | EPHA4     |
| 0.709483466 | stable | LOC652635 |
| 0.709503955 | stable | ACAD9     |
| 0.709601889 | stable | LOC442132 |
| 0.709750347 | stable | LOC650668 |
| 0.709906689 | stable | GFAP      |
| 0.709906689 | stable | LOC646691 |
| 0.709972589 | stable | ZNF780B   |
| 0.710004682 | stable | LOC646976 |
| 0.710127967 | stable | CEND1     |
| 0.710127967 | stable | CCDC89    |
| 0.710127967 | stable | CXCR4     |
| 0.710127967 | stable | OR4N2     |
| 0.710127967 | stable | NDUFA13   |
| 0.710127967 | stable | OR4X1     |
| 0.710127967 | stable | CLC       |
| 0.710127967 | stable | C7ORF13   |
| 0.710176064 | stable | FAM47A    |
| 0.710176064 | stable | C15ORF54  |
| 0.710176064 | stable | LOC402232 |
| 0.710392674 | stable | RFPL3     |
| 0.710399328 | stable | KRTAP4-8  |
| 0.710487352 | stable | SERPINB10 |
| 0.710487352 | stable | CAGE1     |
| 0.710696016 | stable | UBE2V1    |
| 0.710696016 | stable | GRPR      |
| 0.710774379 | stable | LOC646730 |
| 0.710851612 | stable | SGSM2     |
| 0.710928211 | stable | AVPR2     |
| 0.710928211 | stable | TBL1Y     |
| 0.710928211 | stable | NPVF      |
| 0.710928211 | stable | ZDHHC2    |

DEG.infomation

|             |        |           |
|-------------|--------|-----------|
| 0.710994781 | stable | ADAM33    |
| 0.711184608 | stable | NXNL2     |
| 0.711269109 | stable | WSB2      |
| 0.711269109 | stable | LOC651580 |
| 0.711269109 | stable | HAPLN2    |
| 0.711308906 | stable | LOC647234 |
| 0.711308906 | stable | PLSCR5    |
| 0.711308906 | stable | COL11A1   |
| 0.711361234 | stable | FN3KRP    |
| 0.711384805 | stable | LOC649940 |
| 0.711389365 | stable | LOC643619 |
| 0.711402337 | stable | LOC645537 |
| 0.711404479 | stable | TTC23L    |
| 0.711690284 | stable | LOC221981 |
| 0.711690284 | stable | LOC652871 |
| 0.711759351 | stable | LOC646335 |
| 0.711759351 | stable | C9ORF165  |
| 0.711762574 | stable | PADI6     |
| 0.711839881 | stable | NALCN     |
| 0.71188938  | stable | NACA2     |
| 0.711971277 | stable | FAM162B   |
| 0.711971277 | stable | OR6K3     |
| 0.712057502 | stable | GCUD2     |
| 0.712057502 | stable | LOC649878 |
| 0.71232867  | stable | SH3BGR1   |
| 0.712329383 | stable | LOC641912 |
| 0.712329383 | stable | LOC642132 |
| 0.712524752 | stable | LOC652678 |
| 0.712524752 | stable | FSHB      |
| 0.712524752 | stable | ZNF391    |
| 0.712540689 | stable | LOC643855 |
| 0.712578334 | stable | PCDHB5    |
| 0.712623591 | stable | ACSBG1    |
| 0.712651452 | stable | LOC642403 |
| 0.712776855 | stable | LOC650120 |
| 0.712776855 | stable | NR1D2     |
| 0.712776855 | stable | LOC388955 |
| 0.712836847 | stable | LOC642111 |
| 0.713012107 | stable | MLC1      |
| 0.713140047 | stable | CYP2E1    |
| 0.713213083 | stable | LOC646947 |
| 0.713238946 | stable | LOC651578 |
| 0.713238946 | stable | KRTAP19-4 |
| 0.713238946 | stable | TNFRSF13C |
| 0.713238946 | stable | LOC147710 |
| 0.713238946 | stable | LOC642539 |
| 0.713238946 | stable | LOC650673 |
| 0.713267233 | stable | ASB7      |
| 0.713435965 | stable | LOC389888 |
| 0.713436849 | stable | ADH6      |
| 0.713480901 | stable | NBPF9     |

DEG.infomation

|             |        |           |
|-------------|--------|-----------|
| 0.713603093 | stable | GABRQ     |
| 0.713701231 | stable | LOC652115 |
| 0.713800419 | stable | FAM90A2P  |
| 0.713800419 | stable | RAB14     |
| 0.713915728 | stable | LOC652195 |
| 0.713915728 | stable | ADCY9     |
| 0.713915728 | stable | IQGAP3    |
| 0.713944091 | stable | TAF11     |
| 0.714268076 | stable | LOC650439 |
| 0.714277991 | stable | FASLG     |
| 0.71428976  | stable | C7ORF46   |
| 0.714343238 | stable | ANKMY1    |
| 0.714343238 | stable | LOC652799 |
| 0.714453386 | stable | GJB2      |
| 0.714558925 | stable | SCNN1G    |
| 0.714598531 | stable | PCDHGB2   |
| 0.714749171 | stable | SPN       |
| 0.714819524 | stable | LOC401442 |
| 0.714972578 | stable | ZNF346    |
| 0.714972578 | stable | LOC651558 |
| 0.714972578 | stable | RPS13     |
| 0.715108061 | stable | WHSC1L1   |
| 0.715205374 | stable | EOMES     |
| 0.715205374 | stable | SESN2     |
| 0.715303117 | stable | LOC644677 |
| 0.715303117 | stable | PABPC3    |
| 0.71530405  | stable | LOC283711 |
| 0.71530405  | stable | LOC642383 |
| 0.71530405  | stable | TRIML1    |
| 0.71530405  | stable | LOC648791 |
| 0.7153076   | stable | LOC643037 |
| 0.7153076   | stable | LOC728498 |
| 0.715394908 | stable | LOC645162 |
| 0.715606068 | stable | LOC392583 |
| 0.715606068 | stable | ZNF672    |
| 0.715606068 | stable | MAPT      |
| 0.715606068 | stable | VPS13B    |
| 0.715606068 | stable | TRIM44    |
| 0.715606068 | stable | LOC645785 |
| 0.715633968 | stable | POP4      |
| 0.715655526 | stable | RPL9      |
| 0.715655526 | stable | LOC643809 |
| 0.715655526 | stable | MMPL1     |
| 0.715655526 | stable | LOC653636 |
| 0.715655526 | stable | LOR       |
| 0.715679461 | stable | C13ORF31  |
| 0.715679461 | stable | LOC729558 |
| 0.715789442 | stable | ADM2      |
| 0.715789442 | stable | LOC440570 |
| 0.715789442 | stable | LENG9     |
| 0.715789442 | stable | LOC645355 |

## DEG.infomation

|             |        |           |
|-------------|--------|-----------|
| 0.715789442 | stable | LOC154449 |
| 0.715789442 | stable | BCLAF1    |
| 0.715998696 | stable | SRD5A2    |
| 0.715998696 | stable | CAMSAP1L1 |
| 0.715998696 | stable | C17ORF37  |
| 0.716123901 | stable | C6ORF146  |
| 0.716215956 | stable | NANOG     |
| 0.716363697 | stable | LRIT1     |
| 0.716363697 | stable | SLC25A24  |
| 0.716363697 | stable | SLC10A2   |
| 0.716479394 | stable | LOC642155 |
| 0.716582741 | stable | LOC729175 |
| 0.716582741 | stable | ARHGAP17  |
| 0.716582741 | stable | KIAA1919  |
| 0.716582741 | stable | LOC388885 |
| 0.716582741 | stable | LOC401911 |
| 0.716978181 | stable | LOC649210 |
| 0.717080071 | stable | LOC647836 |
| 0.717222303 | stable | C13ORF26  |
| 0.717453001 | stable | LOC731438 |
| 0.717453001 | stable | GSG1L     |
| 0.717455661 | stable | LOC643749 |
| 0.717455661 | stable | FAM99A    |
| 0.717480943 | stable | PRM2      |
| 0.717594886 | stable | LOC645113 |
| 0.717594886 | stable | LOC653136 |
| 0.717626744 | stable | RTN4RL2   |
| 0.717878781 | stable | SPOPL     |
| 0.717885721 | stable | PIK3C2G   |
| 0.717926982 | stable | FLJ32658  |
| 0.718102628 | stable | PCP4L1    |
| 0.718152741 | stable | PIGX      |
| 0.718152741 | stable | PLEKHG7   |
| 0.718206548 | stable | POLR3G    |
| 0.718328826 | stable | HS6ST2    |
| 0.718328826 | stable | MED19     |
| 0.718328826 | stable | LOC646677 |
| 0.718328826 | stable | WNT7A     |
| 0.718328826 | stable | BCORL1    |
| 0.718328826 | stable | LOC648040 |
| 0.718328826 | stable | CHIA      |
| 0.718328826 | stable | ICF45     |
| 0.718328826 | stable | ARHGAP25  |
| 0.718328826 | stable | LOC401206 |
| 0.718328826 | stable | CLDN20    |
| 0.718328826 | stable | LOC441551 |
| 0.718554067 | stable | LOC390998 |
| 0.718554067 | stable | SMG6      |
| 0.718554067 | stable | USF1      |
| 0.718554067 | stable | FLJ44186  |
| 0.718554067 | stable | CRYAA     |



## DEG.infomation

|             |        |              |
|-------------|--------|--------------|
| 0.718615573 | stable | LRRC4B       |
| 0.718615573 | stable | MALAT1       |
| 0.718615573 | stable | OR2L2        |
| 0.718615573 | stable | LOC651006    |
| 0.718769386 | stable | LOC650038    |
| 0.718819491 | stable | KIAA1524     |
| 0.718819491 | stable | LOC283340    |
| 0.718819491 | stable | TBN          |
| 0.718819491 | stable | PGLYRP3      |
| 0.718819491 | stable | PTPRT        |
| 0.718827977 | stable | INCA         |
| 0.718827977 | stable | IL8RB        |
| 0.718830085 | stable | TRIM6-TRIM34 |
| 0.718952234 | stable | CXCR5        |
| 0.718952234 | stable | CRISP2       |
| 0.718952234 | stable | LOC613266    |
| 0.718952234 | stable | MYLK         |
| 0.719020991 | stable | CXCL17       |
| 0.719020991 | stable | IL34         |
| 0.719135922 | stable | EPOR         |
| 0.719199425 | stable | LOC652710    |
| 0.719299882 | stable | GSTO1        |
| 0.719353373 | stable | ALKBH1       |
| 0.719353373 | stable | PBX2         |
| 0.719417631 | stable | EIF4E1B      |
| 0.719417631 | stable | LOC644010    |
| 0.719417631 | stable | C9ORF122     |
| 0.719430269 | stable | VAT1         |
| 0.719518657 | stable | LY6G6E       |
| 0.71956888  | stable | LOC647784    |
| 0.71956888  | stable | SLC17A1      |
| 0.719602965 | stable | XAGE5        |
| 0.719627416 | stable | IQSEC2       |
| 0.719627416 | stable | UBE1         |
| 0.719627416 | stable | LOC642370    |
| 0.719627416 | stable | LOC641788    |
| 0.719627416 | stable | LOC652142    |
| 0.719924992 | stable | THSD3        |
| 0.720010118 | stable | C1QTNF8      |
| 0.720010118 | stable | LOC648898    |
| 0.720113192 | stable | LOC643213    |
| 0.720294274 | stable | PDHA1        |
| 0.720353036 | stable | LOC648130    |
| 0.720361801 | stable | OR52M1       |
| 0.720433642 | stable | LPAR5        |
| 0.720454424 | stable | LOC645448    |
| 0.720482053 | stable | FAM82A2      |
| 0.720743324 | stable | MEST         |
| 0.720801855 | stable | KRTAP5-9     |
| 0.720837742 | stable | LCE3E        |
| 0.721004759 | stable | C11ORF24     |

## DEG.infomation

|             |        |           |
|-------------|--------|-----------|
| 0.721004759 | stable | COLQ      |
| 0.721008984 | stable | RPRM      |
| 0.721129468 | stable | C3ORF27   |
| 0.721159132 | stable | ZNF718    |
| 0.721178397 | stable | SAGE1     |
| 0.721223332 | stable | LOC644617 |
| 0.721223332 | stable | PURG      |
| 0.721269437 | stable | IMPG2     |
| 0.721311393 | stable | ELAC2     |
| 0.721340976 | stable | MAP3K14   |
| 0.721437374 | stable | E2F7      |
| 0.721516743 | stable | TSPAN19   |
| 0.721525884 | stable | AFM       |
| 0.721553076 | stable | LOC651315 |
| 0.721553076 | stable | GPR158L1  |
| 0.721553076 | stable | FKSG83    |
| 0.721553076 | stable | ZNF440    |
| 0.721963078 | stable | TCERG1L   |
| 0.721998138 | stable | GPR12     |
| 0.721998138 | stable | LOC727994 |
| 0.721998138 | stable | CXORF21   |
| 0.721998138 | stable | TCOF1     |
| 0.722003706 | stable | LOC647363 |
| 0.72207201  | stable | C6ORF70   |
| 0.722087816 | stable | ACD       |
| 0.722097654 | stable | SLC16A1   |
| 0.722124221 | stable | LOC646863 |
| 0.722172103 | stable | RPAP2     |
| 0.722285333 | stable | LOC648237 |
| 0.722285333 | stable | EFHB      |
| 0.722285333 | stable | LOC642650 |
| 0.722285333 | stable | B3GALT2   |
| 0.722285333 | stable | LOC642354 |
| 0.722285333 | stable | ATAD3C    |
| 0.722285333 | stable | LOC650406 |
| 0.722376974 | stable | OR5B3     |
| 0.72239982  | stable | LCAP      |
| 0.72239982  | stable | HSFY2     |
| 0.722452343 | stable | LOC652692 |
| 0.722452343 | stable | ST7OT1    |
| 0.722452343 | stable | C11ORF70  |
| 0.72269877  | stable | LAIR1     |
| 0.72269877  | stable | SPINK5    |
| 0.722800999 | stable | LOC642677 |
| 0.722877716 | stable | GNAZ      |
| 0.722906126 | stable | LOC643331 |
| 0.722906126 | stable | LOC643069 |
| 0.723186449 | stable | LOC648365 |
| 0.723186449 | stable | LOC652281 |
| 0.723186449 | stable | GPR172B   |
| 0.723217784 | stable | WBP11P1   |

## DEG.infomation

|             |        |           |
|-------------|--------|-----------|
| 0.723371081 | stable | PPBP      |
| 0.723380815 | stable | ZNF267    |
| 0.723380815 | stable | SLC13A3   |
| 0.723380815 | stable | STRADB    |
| 0.723380815 | stable | TMEM103   |
| 0.723380815 | stable | HCN1      |
| 0.723380815 | stable | C9ORF47   |
| 0.723380815 | stable | LOC644574 |
| 0.723380815 | stable | LOC643576 |
| 0.723380815 | stable | LOC283682 |
| 0.723380815 | stable | LOC148709 |
| 0.723447708 | stable | LOC341112 |
| 0.723623995 | stable | RPS28     |
| 0.723906215 | stable | OR9G9     |
| 0.724026296 | stable | LOC643910 |
| 0.724026296 | stable | SACM1L    |
| 0.724026296 | stable | TRIML2    |
| 0.724029317 | stable | LOC643130 |
| 0.724029317 | stable | LOC387927 |
| 0.724029317 | stable | BCL10     |
| 0.724029317 | stable | MRPS2     |
| 0.724104329 | stable | LOC392617 |
| 0.724104329 | stable | APBA1     |
| 0.724104329 | stable | SYNGR2    |
| 0.724120128 | stable | PRF1      |
| 0.724155039 | stable | C14ORF138 |
| 0.724156237 | stable | MCPH1     |
| 0.724156237 | stable | WNT16     |
| 0.724311069 | stable | BCL7A     |
| 0.724311069 | stable | LOC648521 |
| 0.724311069 | stable | KCNK13    |
| 0.724311069 | stable | TESSP1    |
| 0.724649312 | stable | LOC642568 |
| 0.72479928  | stable | FANCM     |
| 0.724830292 | stable | LOC650058 |
| 0.724830292 | stable | GAS5      |
| 0.724830292 | stable | LOC728193 |
| 0.724830292 | stable | C11ORF36  |
| 0.724830292 | stable | DDB1      |
| 0.724830292 | stable | ZNF452    |
| 0.724869205 | stable | LOC644736 |
| 0.724869205 | stable | MRPL15    |
| 0.72503902  | stable | OTUB2     |
| 0.72503902  | stable | GLRA2     |
| 0.725091861 | stable | IFNB1     |
| 0.725091861 | stable | IL8RBP    |
| 0.725091861 | stable | LOC124220 |
| 0.725091861 | stable | LRRC18    |
| 0.725195561 | stable | LOC440434 |
| 0.725240538 | stable | PDZD11    |
| 0.725288238 | stable | MS4A3     |

DEG.infomation

|             |        |           |
|-------------|--------|-----------|
| 0.725288238 | stable | LOC345537 |
| 0.725288238 | stable | LOC399829 |
| 0.725288238 | stable | LOC644762 |
| 0.725288238 | stable | LOC389151 |
| 0.725310781 | stable | TTY12     |
| 0.725315887 | stable | PARD6B    |
| 0.725315887 | stable | PTPRN     |
| 0.72544728  | stable | LHFPL1    |
| 0.72555192  | stable | LOC643075 |
| 0.72555192  | stable | RAB11FIP4 |
| 0.72555192  | stable | C17ORF67  |
| 0.72558048  | stable | LOC200261 |
| 0.72559698  | stable | LOC643302 |
| 0.72559698  | stable | LOC643435 |
| 0.725655795 | stable | LOC649255 |
| 0.725655795 | stable | LOC641938 |
| 0.725769549 | stable | VCY1B     |
| 0.725774702 | stable | LOC284293 |
| 0.72592567  | stable | LOC652155 |
| 0.72592567  | stable | LOC730226 |
| 0.72592567  | stable | FLJ37543  |
| 0.725952406 | stable | LOC642121 |
| 0.726229063 | stable | OR7E156P  |
| 0.726229063 | stable | NLRP11    |
| 0.726282437 | stable | LOC652597 |
| 0.726334374 | stable | SPIB      |
| 0.726338212 | stable | SPSB2     |
| 0.726358446 | stable | LOC646697 |
| 0.726513279 | stable | LOC401497 |
| 0.7265433   | stable | OR2F1     |
| 0.726623303 | stable | ENTPD7    |
| 0.726715966 | stable | HSPC159   |
| 0.72672313  | stable | CCKAR     |
| 0.72672469  | stable | SCN4A     |
| 0.726751926 | stable | SNAI1     |
| 0.727151842 | stable | LOC650147 |
| 0.727288583 | stable | LSM14A    |
| 0.727288583 | stable | OR10P1    |
| 0.727406773 | stable | OR52E4    |
| 0.727709223 | stable | TMEM63B   |
| 0.727709223 | stable | LOC440005 |
| 0.727709223 | stable | LOC442117 |
| 0.727728336 | stable | LOC284260 |
| 0.727728336 | stable | LOC642861 |
| 0.727728336 | stable | LOC727855 |
| 0.727728336 | stable | PGRMC2    |
| 0.7277689   | stable | LOC442229 |
| 0.7277689   | stable | TSSK3     |
| 0.7277689   | stable | CPA1      |
| 0.7277689   | stable | LOC642726 |
| 0.7277689   | stable | LOC392275 |

## DEG.infomation

|             |        |           |
|-------------|--------|-----------|
| 0.7277689   | stable | CACYBP    |
| 0.727819375 | stable | LOC727732 |
| 0.727851855 | stable | LOC347364 |
| 0.727956523 | stable | PSG11     |
| 0.727956523 | stable | CACNA1G   |
| 0.727956523 | stable | LRIT3     |
| 0.727956523 | stable | ZNF761    |
| 0.727967225 | stable | KIAA1957  |
| 0.727967225 | stable | LOC730242 |
| 0.72805001  | stable | LOC647212 |
| 0.728132278 | stable | LOC649246 |
| 0.728132278 | stable | LOC654172 |
| 0.728239675 | stable | LOC647447 |
| 0.728260975 | stable | PBEF1     |
| 0.728376979 | stable | LOC653676 |
| 0.728376979 | stable | CGB5      |
| 0.728486558 | stable | LOC644100 |
| 0.728486558 | stable | TSPAN6    |
| 0.728486558 | stable | LOC648868 |
| 0.728731578 | stable | SMR3A     |
| 0.728731578 | stable | INTS7     |
| 0.728731578 | stable | EIF4G2    |
| 0.728731578 | stable | SPATC1    |
| 0.728731578 | stable | BRUNOL5   |
| 0.728731578 | stable | FXC1      |
| 0.728890754 | stable | C19ORF45  |
| 0.728939434 | stable | KIAA1644  |
| 0.728939434 | stable | DDX52     |
| 0.728939434 | stable | HPX       |
| 0.728939434 | stable | METRNL    |
| 0.728939434 | stable | MGC16291  |
| 0.728941797 | stable | LOC653310 |
| 0.728967759 | stable | CSN1S1    |
| 0.728967759 | stable | GIF       |
| 0.728967759 | stable | CMPK2     |
| 0.728967759 | stable | LOC642035 |
| 0.728967759 | stable | LOC646296 |
| 0.728967759 | stable | KRTAP23-1 |
| 0.729017009 | stable | LOC648894 |
| 0.729017009 | stable | PYHIN1    |
| 0.72914343  | stable | LOC652408 |
| 0.729180092 | stable | RAP2A     |
| 0.729286705 | stable | LOC641959 |
| 0.729286705 | stable | EFNA1     |
| 0.729286705 | stable | LOC647521 |
| 0.729286705 | stable | LOC652471 |
| 0.729286705 | stable | LOC645143 |
| 0.729294761 | stable | GIGYF1    |
| 0.729294761 | stable | LOC399937 |
| 0.729475461 | stable | LOC345222 |
| 0.729575455 | stable | LOC642223 |

## DEG.infomation

|             |        |               |
|-------------|--------|---------------|
| 0.729618807 | stable | DLX5          |
| 0.729629489 | stable | FLJ46481      |
| 0.729629489 | stable | TNS4          |
| 0.729629489 | stable | LOC653853     |
| 0.729656455 | stable | LOC654127     |
| 0.729656455 | stable | C6ORF81       |
| 0.729656455 | stable | SMOC1         |
| 0.72965673  | stable | OTOG          |
| 0.729658327 | stable | KIAA1285      |
| 0.729658327 | stable | IGSF8         |
| 0.729666324 | stable | TACR1         |
| 0.729746892 | stable | KRTAP4-11     |
| 0.729748027 | stable | BRDT          |
| 0.729761305 | stable | SNX20         |
| 0.729761305 | stable | OTUB1         |
| 0.729761305 | stable | PF4V1         |
| 0.729864973 | stable | UBE2E1        |
| 0.729919863 | stable | LOC641848     |
| 0.729919863 | stable | C15ORF41      |
| 0.729919863 | stable | LOC648625     |
| 0.729919863 | stable | MYH16         |
| 0.730165577 | stable | LOC644431     |
| 0.730174932 | stable | LOC645411     |
| 0.730181642 | stable | IFNA6         |
| 0.730245801 | stable | NT5M          |
| 0.730245801 | stable | CSH1          |
| 0.730245801 | stable | EPB42         |
| 0.730333137 | stable | LOC732156     |
| 0.73043721  | stable | LOC648931     |
| 0.730498999 | stable | LOC647529     |
| 0.730514396 | stable | RPL37A        |
| 0.730514396 | stable | LOC390205     |
| 0.730514396 | stable | CRNN          |
| 0.730514396 | stable | LOC728302     |
| 0.73060859  | stable | FCGR2C        |
| 0.730758608 | stable | GSTA3         |
| 0.730831983 | stable | LOC256223     |
| 0.730831983 | stable | SLC24A4       |
| 0.730861664 | stable | LOC646818     |
| 0.730861664 | stable | T             |
| 0.730997599 | stable | EHF           |
| 0.730997599 | stable | LOC651481     |
| 0.730997599 | stable | LOC649661     |
| 0.730997599 | stable | DECR1         |
| 0.730997599 | stable | SLC35A3       |
| 0.731057874 | stable | MDM1          |
| 0.731057874 | stable | LOC651536     |
| 0.731189242 | stable | STON1-GTF2A1L |
| 0.731207751 | stable | LOC727942     |
| 0.731207751 | stable | CCL22         |
| 0.731207751 | stable | LOC642943     |

DEG.infomation

|             |        |           |
|-------------|--------|-----------|
| 0.731207751 | stable | MMACHC    |
| 0.731207751 | stable | KRTAP5-8  |
| 0.731207751 | stable | SLC10A4   |
| 0.731207751 | stable | GKN2      |
| 0.731255931 | stable | LOC644946 |
| 0.731275362 | stable | TSHZ2     |
| 0.731341059 | stable | LOC731236 |
| 0.731372752 | stable | AANAT     |
| 0.731397708 | stable | POLI      |
| 0.731439051 | stable | LOC653129 |
| 0.731548879 | stable | PCDHGA2   |
| 0.731558284 | stable | TACR2     |
| 0.731614269 | stable | MAGEA8    |
| 0.731614812 | stable | COX5B     |
| 0.731614812 | stable | AMIGO3    |
| 0.731635988 | stable | LOC730050 |
| 0.73171664  | stable | SMC1B     |
| 0.731729257 | stable | KIR3DL2   |
| 0.731729257 | stable | SHOC2     |
| 0.731729257 | stable | YJEFN3    |
| 0.732098118 | stable | LOC401507 |
| 0.732109896 | stable | CYTH1     |
| 0.732156006 | stable | C10ORF64  |
| 0.732184539 | stable | OR2D3     |
| 0.732270854 | stable | LOC654133 |
| 0.732270854 | stable | CACNG6    |
| 0.732322559 | stable | LRRC26    |
| 0.732322559 | stable | PAFAH1B1  |
| 0.732415028 | stable | ASPHD2    |
| 0.732480967 | stable | AGPAT5    |
| 0.732521964 | stable | CYP4F11   |
| 0.732760917 | stable | LOC728056 |
| 0.732760917 | stable | HIST1H1B  |
| 0.732760917 | stable | PLK4      |
| 0.732815024 | stable | SPANXA1   |
| 0.732836408 | stable | OR5H2     |
| 0.732836408 | stable | LOC401286 |
| 0.732908153 | stable | DFNB31    |
| 0.733144933 | stable | LOC646914 |
| 0.733144933 | stable | WDR53     |
| 0.733518602 | stable | FLJ12334  |
| 0.733618263 | stable | DAAM2     |
| 0.73363006  | stable | LOC646154 |
| 0.73393823  | stable | FLJ32214  |
| 0.734138916 | stable | FLJ44060  |
| 0.734138916 | stable | LOC647998 |
| 0.734138916 | stable | ZNF410    |
| 0.734138916 | stable | RNF133    |
| 0.73439037  | stable | ASPN      |
| 0.734455129 | stable | PEG10     |
| 0.734455129 | stable | LOC650795 |

## DEG.infomation

|             |        |           |
|-------------|--------|-----------|
| 0.734455129 | stable | HLA-DRB5  |
| 0.734466749 | stable | API5      |
| 0.734536811 | stable | SPDYC     |
| 0.734536811 | stable | LOC644528 |
| 0.73467951  | stable | MPZ       |
| 0.734692914 | stable | CCIN      |
| 0.734889706 | stable | TAGLN3    |
| 0.734889706 | stable | LRRC56    |
| 0.734936917 | stable | DOCK3     |
| 0.734946397 | stable | SPRR1A    |
| 0.734946397 | stable | MANBAL    |
| 0.735059335 | stable | LOC644836 |
| 0.735059335 | stable | LOC727820 |
| 0.735059335 | stable | UCP1      |
| 0.735068987 | stable | LOC644320 |
| 0.735068987 | stable | DUSP8     |
| 0.735075085 | stable | IQSEC3    |
| 0.735091942 | stable | GPR81     |
| 0.735091942 | stable | LOC645908 |
| 0.735091942 | stable | LOC644809 |
| 0.735295273 | stable | LOC653089 |
| 0.735295273 | stable | OR5R1     |
| 0.735311114 | stable | LOC654342 |
| 0.735330535 | stable | PTPRH     |
| 0.735356711 | stable | CEP97     |
| 0.735428757 | stable | LOC388948 |
| 0.735615621 | stable | CYTH3     |
| 0.735641183 | stable | LOC651450 |
| 0.735641183 | stable | FAM83A    |
| 0.735703794 | stable | ZRANB1    |
| 0.735854109 | stable | CNTD2     |
| 0.735858311 | stable | VILL      |
| 0.735858311 | stable | C10ORF30  |
| 0.735858311 | stable | TAF13     |
| 0.735858311 | stable | CABP4     |
| 0.735858311 | stable | LHFPL4    |
| 0.735858311 | stable | YWHAG     |
| 0.735937632 | stable | SLC30A4   |
| 0.735939575 | stable | C1ORF173  |
| 0.735949295 | stable | ZNF257    |
| 0.736051877 | stable | PFN2      |
| 0.736093561 | stable | LOC649442 |
| 0.736462558 | stable | LRRIQ4    |
| 0.736498196 | stable | LOC147645 |
| 0.736498196 | stable | STK16     |
| 0.736498196 | stable | NPAS1     |
| 0.736498196 | stable | C21ORF129 |
| 0.736535775 | stable | EDG4      |
| 0.736535775 | stable | LOC647264 |
| 0.736577866 | stable | FBXO24    |
| 0.736646204 | stable | HMGCLL1   |



## DEG.infomation

|             |        |            |
|-------------|--------|------------|
| 0.736646204 | stable | HLA-G      |
| 0.736676105 | stable | LOC646720  |
| 0.736676105 | stable | ATP6AP2    |
| 0.736993739 | stable | GPX5       |
| 0.736993739 | stable | TLR10      |
| 0.736993739 | stable | LOC342900  |
| 0.736993739 | stable | LOC645144  |
| 0.737003554 | stable | N4BP3      |
| 0.73708653  | stable | MRPL9      |
| 0.73708653  | stable | C1ORF31    |
| 0.737171056 | stable | KIAA0774   |
| 0.737171056 | stable | PDZD3      |
| 0.737171056 | stable | JARID1D    |
| 0.737171056 | stable | BZRPL1     |
| 0.737171056 | stable | SNORD116-4 |
| 0.737219952 | stable | LOC440287  |
| 0.737219952 | stable | FSD1       |
| 0.737229556 | stable | ADRBK2     |
| 0.737300178 | stable | UTS2R      |
| 0.737300178 | stable | LOC391025  |
| 0.737300178 | stable | LOC391209  |
| 0.737300178 | stable | LOC653180  |
| 0.737326402 | stable | RSAD2      |
| 0.737326402 | stable | UTP23      |
| 0.737326402 | stable | SCGB3A2    |
| 0.737370372 | stable | LRRC57     |
| 0.737370372 | stable | CGN        |
| 0.737421109 | stable | LOC648211  |
| 0.737435658 | stable | PCDHA2     |
| 0.737673019 | stable | C4ORF28    |
| 0.737673019 | stable | LOC646999  |
| 0.737694723 | stable | MLLT1      |
| 0.737741355 | stable | LOC649700  |
| 0.737741355 | stable | LOC652707  |
| 0.737893909 | stable | SNX31      |
| 0.737916241 | stable | MYH8       |
| 0.737978288 | stable | OR1L3      |
| 0.737978288 | stable | FCRLA      |
| 0.737978288 | stable | LOC653799  |
| 0.738002675 | stable | IGF2BP2    |
| 0.738002675 | stable | KLHDC8A    |
| 0.738109842 | stable | BLOC1S1    |
| 0.738210237 | stable | CYP1A1     |
| 0.738225928 | stable | LOC651586  |
| 0.738237349 | stable | EFHA1      |
| 0.738237349 | stable | A26A1      |
| 0.738435936 | stable | C11ORF2    |
| 0.738496101 | stable | LOC645951  |
| 0.738496101 | stable | LOC653468  |
| 0.738496101 | stable | LOC649762  |
| 0.738496101 | stable | SNORD26    |

## DEG.infomation

|             |        |           |
|-------------|--------|-----------|
| 0.738496101 | stable | SECTM1    |
| 0.738496101 | stable | PAIP2B    |
| 0.738496101 | stable | LOC645128 |
| 0.738496101 | stable | PM20D1    |
| 0.739232195 | stable | LOC642751 |
| 0.739232195 | stable | LOC650549 |
| 0.739232195 | stable | FLJ35880  |
| 0.739311166 | stable | TFG       |
| 0.739311166 | stable | C20ORF85  |
| 0.739311166 | stable | CCL4L2    |
| 0.739311166 | stable | TRMU      |
| 0.739311166 | stable | C1ORF70   |
| 0.739311166 | stable | LOC646320 |
| 0.739311166 | stable | LOC645885 |
| 0.739311166 | stable | CRX       |
| 0.739311166 | stable | LOC647031 |
| 0.739311166 | stable | FREM3     |
| 0.739311166 | stable | LOC653441 |
| 0.739345631 | stable | ABCC9     |
| 0.739345631 | stable | LOC198437 |
| 0.739405932 | stable | COL12A1   |
| 0.739405932 | stable | ZNF776    |
| 0.739405932 | stable | LOC643045 |
| 0.739405932 | stable | DHX29     |
| 0.739405932 | stable | LOC643692 |
| 0.739405932 | stable | LOC643899 |
| 0.739405932 | stable | OR5M11    |
| 0.739405932 | stable | OR8G1     |
| 0.739713266 | stable | LOC644484 |
| 0.739738082 | stable | PRX       |
| 0.739738082 | stable | LOC642615 |
| 0.739738082 | stable | DPF2      |
| 0.739845986 | stable | LOC647850 |
| 0.739903625 | stable | LOC647046 |
| 0.739952127 | stable | PRKAA1    |
| 0.740109044 | stable | OAZ3      |
| 0.740218326 | stable | LOC643906 |
| 0.740268842 | stable | LOC286076 |
| 0.740519436 | stable | TTBK2     |
| 0.74053881  | stable | LOC654080 |
| 0.740595056 | stable | PAGE3     |
| 0.740598622 | stable | ZNF461    |
| 0.740598622 | stable | LOC644200 |
| 0.740598622 | stable | CCDC5     |
| 0.740599686 | stable | LOC646139 |
| 0.74061368  | stable | C2ORF51   |
| 0.740647552 | stable | LOC653980 |
| 0.740647552 | stable | OR4F3     |
| 0.740735735 | stable | OR4C13    |
| 0.740867596 | stable | MGC34800  |
| 0.741118427 | stable | GSTZ1     |

## DEG.infomation

|             |        |           |
|-------------|--------|-----------|
| 0.741118427 | stable | LOC642231 |
| 0.741198852 | stable | LOC653722 |
| 0.741198852 | stable | SAP30BP   |
| 0.741198852 | stable | C8A       |
| 0.741198852 | stable | IGF1      |
| 0.741312356 | stable | OR2C3     |
| 0.741377145 | stable | GPR158    |
| 0.74139387  | stable | GZMB      |
| 0.74139387  | stable | FRAG1     |
| 0.74139387  | stable | B4GALNT1  |
| 0.74139387  | stable | LOC645118 |
| 0.74139387  | stable | ESPNP     |
| 0.74139387  | stable | LOC728441 |
| 0.74139387  | stable | LOC652168 |
| 0.74139387  | stable | C14ORF166 |
| 0.74139387  | stable | LOC642765 |
| 0.74139387  | stable | LOC641750 |
| 0.74139387  | stable | LOC388882 |
| 0.741413558 | stable | GKN1      |
| 0.741466541 | stable | LOC642731 |
| 0.741709782 | stable | CD1C      |
| 0.741788051 | stable | LOXHD1    |
| 0.741887203 | stable | LOC730184 |
| 0.741967045 | stable | C9ORF50   |
| 0.742173302 | stable | LOC650278 |
| 0.742173302 | stable | GH2       |
| 0.742173302 | stable | FAM75A3   |
| 0.742178802 | stable | CAMKV     |
| 0.742219279 | stable | TMEM41B   |
| 0.742219279 | stable | TNKS2     |
| 0.742258487 | stable | LOC730240 |
| 0.74226256  | stable | LOC651208 |
| 0.742407037 | stable | DPEP3     |
| 0.742407037 | stable | TBC1D13   |
| 0.742407037 | stable | IGLL3     |
| 0.742460545 | stable | LOC645701 |
| 0.742478452 | stable | E2F6      |
| 0.742531747 | stable | WBP2NL    |
| 0.742531747 | stable | HNRNPCL1  |
| 0.742531747 | stable | MTPN      |
| 0.742531747 | stable | LOC392232 |
| 0.742531747 | stable | LOC653598 |
| 0.742531747 | stable | FLJ32955  |
| 0.742531747 | stable | LOC642960 |
| 0.742571747 | stable | AGXT      |
| 0.742571747 | stable | COPS7B    |
| 0.742571747 | stable | LOC646762 |
| 0.742571747 | stable | CYP11B1   |
| 0.742571747 | stable | FLJ46321  |
| 0.74264028  | stable | LOC644122 |
| 0.742693564 | stable | ABHD9     |

## DEG.infomation

|             |        |           |
|-------------|--------|-----------|
| 0.742880536 | stable | KIAA0258  |
| 0.742909469 | stable | DDX55     |
| 0.742909469 | stable | MORF4     |
| 0.743156902 | stable | LOC647171 |
| 0.743404957 | stable | LOC642527 |
| 0.743404957 | stable | LOC642830 |
| 0.743481686 | stable | NFKBIL2   |
| 0.743590986 | stable | MFGE8     |
| 0.743590986 | stable | LOC199882 |
| 0.743590986 | stable | PGAM1     |
| 0.743590986 | stable | LOC388080 |
| 0.743590986 | stable | C4ORF22   |
| 0.74381695  | stable | OTP       |
| 0.743987085 | stable | LOC651714 |
| 0.744032227 | stable | ACTC1     |
| 0.744032227 | stable | LOC646179 |
| 0.744032227 | stable | LOC644491 |
| 0.744132167 | stable | GPR32     |
| 0.74420113  | stable | RABEPK    |
| 0.744211598 | stable | LOC392262 |
| 0.744215026 | stable | LOC644783 |
| 0.744340621 | stable | ISLR2     |
| 0.744340621 | stable | LOC644701 |
| 0.744340621 | stable | VAMP4     |
| 0.744340621 | stable | LOC152578 |
| 0.744340621 | stable | WT1       |
| 0.744377537 | stable | FLJ45079  |
| 0.744377537 | stable | RNASEH2C  |
| 0.744543965 | stable | SEMG2     |
| 0.744543965 | stable | CHCHD10   |
| 0.744543965 | stable | LOC643365 |
| 0.744543965 | stable | AKIRIN2   |
| 0.744543965 | stable | LOC653664 |
| 0.744543965 | stable | LOC439965 |
| 0.744543965 | stable | ASAH2B    |
| 0.744543965 | stable | LOC654101 |
| 0.744543965 | stable | PRAMEF4   |
| 0.744543965 | stable | LOC644887 |
| 0.744543965 | stable | TSPAN15   |
| 0.744682199 | stable | PTPRV     |
| 0.744682199 | stable | OR6N1     |
| 0.744836951 | stable | LOC642692 |
| 0.744916447 | stable | LOC647096 |
| 0.745028523 | stable | LOC442512 |
| 0.745028523 | stable | LOC440225 |
| 0.745136362 | stable | OR6C68    |
| 0.745136362 | stable | LAMB4     |
| 0.745137228 | stable | LOC646307 |
| 0.745205403 | stable | LOC643998 |
| 0.745394193 | stable | ITLN2     |
| 0.745425784 | stable | TMEM180   |

## DEG.infomation

|             |        |               |
|-------------|--------|---------------|
| 0.745425784 | stable | COTL1         |
| 0.745425784 | stable | MYCL1         |
| 0.745569212 | stable | C7ORF31       |
| 0.745569212 | stable | GPR128        |
| 0.745580732 | stable | INHBA         |
| 0.745580732 | stable | CTCFL         |
| 0.745683652 | stable | LOC642257     |
| 0.745844385 | stable | THBS2         |
| 0.745844385 | stable | LOC644255     |
| 0.745844385 | stable | TMEM176A      |
| 0.745844385 | stable | PAPSS1        |
| 0.745844385 | stable | LUC7L         |
| 0.745876724 | stable | MAGEA2        |
| 0.745963668 | stable | FAM153C       |
| 0.745998747 | stable | LOC648434     |
| 0.745998747 | stable | C6ORF165      |
| 0.746072316 | stable | CYP3A43       |
| 0.746072316 | stable | LOC651112     |
| 0.746105858 | stable | MCF2L         |
| 0.746105858 | stable | AIM1          |
| 0.746105858 | stable | ANGPTL3       |
| 0.746121992 | stable | LOC647215     |
| 0.746231829 | stable | PRKAG3        |
| 0.746231829 | stable | LOC650965     |
| 0.746231829 | stable | SLC18A1       |
| 0.746398562 | stable | KRT37         |
| 0.74649989  | stable | CENTB2        |
| 0.74649989  | stable | FLJ43093      |
| 0.74649989  | stable | VPRBP         |
| 0.746593951 | stable | BAZ2A         |
| 0.746626512 | stable | RINL          |
| 0.746626512 | stable | SPRR2D        |
| 0.746626512 | stable | LOC441016     |
| 0.746765071 | stable | LOC647584     |
| 0.746765071 | stable | LOC645730     |
| 0.746788222 | stable | LOC442474     |
| 0.746788222 | stable | FBN2          |
| 0.746825237 | stable | LOC440687     |
| 0.746998154 | stable | C9ORF37       |
| 0.747087607 | stable | THADA         |
| 0.74721298  | stable | LOC648405     |
| 0.747226528 | stable | AQP1          |
| 0.747226528 | stable | LOC649641     |
| 0.747226528 | stable | LOC400858     |
| 0.747440958 | stable | FTHL11        |
| 0.747446099 | stable | LOC651842     |
| 0.747446099 | stable | LOC648164     |
| 0.747446099 | stable | LOC390669     |
| 0.747446099 | stable | LOC641697     |
| 0.747692656 | stable | KCNQ1         |
| 0.747692656 | stable | DKFZP564N2472 |

## DEG.infomation

|             |        |           |
|-------------|--------|-----------|
| 0.747692656 | stable | LOC647246 |
| 0.747692656 | stable | SLC35E2   |
| 0.747692656 | stable | TRPV5     |
| 0.747692656 | stable | FAM26C    |
| 0.747692656 | stable | FLJ44290  |
| 0.747692656 | stable | MAP2K7    |
| 0.747692656 | stable | GRIN2B    |
| 0.747692656 | stable | SPINK6    |
| 0.747692656 | stable | C11ORF49  |
| 0.747692656 | stable | MB        |
| 0.747692656 | stable | LOC649212 |
| 0.747692656 | stable | KCTD16    |
| 0.747722787 | stable | LOC442446 |
| 0.747722787 | stable | CDC20B    |
| 0.747843992 | stable | RAB2B     |
| 0.747951019 | stable | LOC441722 |
| 0.748048953 | stable | KRT38     |
| 0.74810873  | stable | LOC650429 |
| 0.748121698 | stable | COX4I2    |
| 0.748154154 | stable | IL13      |
| 0.748154154 | stable | FLJ41481  |
| 0.74817245  | stable | TNFRSF19  |
| 0.748225665 | stable | ATAD4     |
| 0.748225665 | stable | PNLIP     |
| 0.748225665 | stable | ZNF74     |
| 0.748225665 | stable | IYD       |
| 0.748285885 | stable | LOC727937 |
| 0.748383835 | stable | SPZ1      |
| 0.748399556 | stable | TAT       |
| 0.748556329 | stable | ENTHD1    |
| 0.74859732  | stable | LOC645278 |
| 0.74859732  | stable | LOC648878 |
| 0.74859732  | stable | DIO3      |
| 0.7486992   | stable | FTHL17    |
| 0.748705991 | stable | ALDH1B1   |
| 0.748705991 | stable | NFATC2IP  |
| 0.748705991 | stable | LOC199897 |
| 0.748705991 | stable | LY6G6C    |
| 0.748705991 | stable | PRNPIP    |
| 0.748705991 | stable | OR2AT4    |
| 0.748863729 | stable | MEIS2     |
| 0.748905952 | stable | ASAH2     |
| 0.748935562 | stable | PKLR      |
| 0.748935562 | stable | LOC646867 |
| 0.748935562 | stable | OR2W5     |
| 0.748975688 | stable | LOC392440 |
| 0.748994629 | stable | CEACAM19  |
| 0.748994629 | stable | NOS1AP    |
| 0.749045869 | stable | LOC652813 |
| 0.749045869 | stable | OR52N5    |
| 0.749045869 | stable | SPATA8    |

DEG.infomation

|             |        |           |
|-------------|--------|-----------|
| 0.749045869 | stable | PIP5K1B   |
| 0.749045869 | stable | IGFBPL1   |
| 0.749045869 | stable | SLC7A14   |
| 0.749045869 | stable | DUSP15    |
| 0.749045869 | stable | LOC642464 |
| 0.749045869 | stable | GGTA1     |
| 0.749045869 | stable | TEX2      |
| 0.749045869 | stable | BEST2     |
| 0.749064505 | stable | LOC652757 |
| 0.749064505 | stable | DBF4      |
| 0.749073261 | stable | NEUROG1   |
| 0.749085446 | stable | GPR1      |
| 0.749085446 | stable | PLXNB2    |
| 0.749104079 | stable | LOC646237 |
| 0.74910719  | stable | LOC648604 |
| 0.749296231 | stable | LCA5L     |
| 0.749451028 | stable | TMEM186   |
| 0.750003113 | stable | LOC401398 |
| 0.750087077 | stable | NFKBIE    |
| 0.750163894 | stable | LOC650465 |
| 0.750546954 | stable | OR10K1    |
| 0.7506808   | stable | KIF25     |
| 0.750692404 | stable | TAL1      |
| 0.750791459 | stable | TAAR1     |
| 0.750791459 | stable | CCDC64    |
| 0.750920919 | stable | C5ORF20   |
| 0.75112956  | stable | HLA2      |
| 0.75112956  | stable | LOC652747 |
| 0.75112956  | stable | LOC650151 |
| 0.75112956  | stable | PRRG3     |
| 0.75112956  | stable | LOC645052 |
| 0.75112956  | stable | DPEP1     |
| 0.751149839 | stable | AKR1CL2   |
| 0.751157184 | stable | OR2K2     |
| 0.751167335 | stable | USP47     |
| 0.751167335 | stable | NRG4      |
| 0.751215005 | stable | LOC645652 |
| 0.751308894 | stable | METAP1    |
| 0.751308894 | stable | LOC643529 |
| 0.751308894 | stable | WBSCR28   |
| 0.751308894 | stable | SCN1B     |
| 0.751335235 | stable | NDUFS8    |
| 0.751352256 | stable | LOC401620 |
| 0.751352256 | stable | KIAA0562  |
| 0.751352256 | stable | LOC652547 |
| 0.751352256 | stable | OR2G6     |
| 0.751352256 | stable | TULP1     |
| 0.751352256 | stable | LOC730996 |
| 0.75139152  | stable | NPEPPS    |
| 0.75153647  | stable | C3ORF22   |
| 0.751616804 | stable | CKS2      |

## DEG.infomation

|             |        |           |
|-------------|--------|-----------|
| 0.751616804 | stable | OR2W1     |
| 0.751768264 | stable | LOC644686 |
| 0.751768264 | stable | LOC649185 |
| 0.751768264 | stable | LOC651643 |
| 0.751771479 | stable | ICHTHYIN  |
| 0.752003183 | stable | MGC34821  |
| 0.75221586  | stable | LOC647661 |
| 0.752438965 | stable | TRDMT1    |
| 0.752481688 | stable | ZC3H7B    |
| 0.752613674 | stable | NTAN1     |
| 0.752613674 | stable | LAPTM4B   |
| 0.752613674 | stable | GAPDHS    |
| 0.752664714 | stable | LOC646509 |
| 0.752664714 | stable | OR14A16   |
| 0.7527564   | stable | LOC647149 |
| 0.7527564   | stable | LOC221091 |
| 0.7527564   | stable | LOC644950 |
| 0.7527564   | stable | OR4L1     |
| 0.7527564   | stable | OTX2      |
| 0.752868197 | stable | ZNF705D   |
| 0.752933445 | stable | MTMR9     |
| 0.752933445 | stable | RANBP17   |
| 0.752933445 | stable | LOC647989 |
| 0.753046102 | stable | LOC644473 |
| 0.753427333 | stable | LOC646862 |
| 0.753427333 | stable | LOC652741 |
| 0.753457906 | stable | LOC651807 |
| 0.753457906 | stable | LOC642037 |
| 0.753457906 | stable | LOC642097 |
| 0.753457906 | stable | DAB1      |
| 0.753667928 | stable | KLK8      |
| 0.75367322  | stable | TUBB1     |
| 0.754126736 | stable | LOC642537 |
| 0.754126736 | stable | LOC645238 |
| 0.754126736 | stable | KLRC4     |
| 0.754126736 | stable | MASP2     |
| 0.754126736 | stable | LOC728656 |
| 0.754312547 | stable | KLRC2     |
| 0.754312547 | stable | XAGE-4    |
| 0.754340015 | stable | LOC285423 |
| 0.754345549 | stable | LOC642222 |
| 0.754358423 | stable | HTR1E     |
| 0.754358423 | stable | LOC648863 |
| 0.754370769 | stable | LOC651096 |
| 0.754370769 | stable | PDSS2     |
| 0.754370769 | stable | LOC642405 |
| 0.754417695 | stable | SUZ12     |
| 0.754417695 | stable | THUMPD2   |
| 0.754565205 | stable | FLJ44955  |
| 0.754565205 | stable | LOC644856 |
| 0.754565205 | stable | ZNF774    |



## DEG.infomation

|             |        |           |
|-------------|--------|-----------|
| 0.754565205 | stable | HOXA7     |
| 0.754565205 | stable | LOC390243 |
| 0.75461089  | stable | C16ORF73  |
| 0.754756164 | stable | OR52A1    |
| 0.754756164 | stable | LOC642974 |
| 0.754789978 | stable | LOC645522 |
| 0.754829816 | stable | SCUBE1    |
| 0.754887013 | stable | RAB1B     |
| 0.754887013 | stable | MRPS22    |
| 0.754887013 | stable | RNF183    |
| 0.754887013 | stable | DDX4      |
| 0.754887013 | stable | FLJ44385  |
| 0.754887013 | stable | KIAA0368  |
| 0.754941497 | stable | LOC729966 |
| 0.754941497 | stable | SLC9A11   |
| 0.754941497 | stable | MIF       |
| 0.755145299 | stable | LOC648568 |
| 0.75523754  | stable | LCE2A     |
| 0.75523754  | stable | LOC653983 |
| 0.75523754  | stable | RLN3      |
| 0.75523754  | stable | LOC390846 |
| 0.75523754  | stable | SERPINA11 |
| 0.755307743 | stable | ARPM1     |
| 0.755307743 | stable | DNAJC5B   |
| 0.755307743 | stable | MAGEA12   |
| 0.75541787  | stable | HISPPD1   |
| 0.75541787  | stable | LOC646848 |
| 0.75541787  | stable | A26B1     |
| 0.755514062 | stable | LOC643948 |
| 0.755514062 | stable | MPP7      |
| 0.755539419 | stable | LOC645232 |
| 0.755539419 | stable | RPL5      |
| 0.755539419 | stable | ZNF205    |
| 0.755539419 | stable | ANKRD56   |
| 0.755539419 | stable | RBM8A     |
| 0.755539419 | stable | PPYR1     |
| 0.755699933 | stable | LOC653211 |
| 0.755699933 | stable | IBSP      |
| 0.755699933 | stable | FLJ43879  |
| 0.755699933 | stable | LOC648487 |
| 0.755699933 | stable | BTBD8     |
| 0.755699933 | stable | LOC133491 |
| 0.755699933 | stable | LOC644934 |
| 0.755699933 | stable | FAM84B    |
| 0.755699933 | stable | LOC648256 |
| 0.755876798 | stable | LRRC30    |
| 0.755947012 | stable | TMEM168   |
| 0.755985014 | stable | LOC644155 |
| 0.756212019 | stable | LOC653620 |
| 0.756276144 | stable | TAS2R5    |
| 0.756354262 | stable | LOC652870 |

DEG.infomation

|             |        |           |
|-------------|--------|-----------|
| 0.756354262 | stable | TOMM5     |
| 0.756354262 | stable | ADRB2     |
| 0.756357587 | stable | SP6       |
| 0.756357587 | stable | NFKBID    |
| 0.756360976 | stable | LOC646793 |
| 0.756414832 | stable | MBNL2     |
| 0.756414832 | stable | FTMT      |
| 0.756414832 | stable | KLHL14    |
| 0.756414832 | stable | PAX1      |
| 0.756414832 | stable | LOC644063 |
| 0.75642341  | stable | LOC643464 |
| 0.756585099 | stable | LOC497190 |
| 0.756608702 | stable | LOC442245 |
| 0.756659066 | stable | HIST1H2BM |
| 0.757029564 | stable | CYP4F22   |
| 0.757097795 | stable | ARSH      |
| 0.757097795 | stable | HNRNPA3   |
| 0.757180751 | stable | WFDC10A   |
| 0.757180751 | stable | DEFA5     |
| 0.757250946 | stable | LOC651921 |
| 0.757250946 | stable | ADAM18    |
| 0.757369836 | stable | C1ORF27   |
| 0.75740205  | stable | XAGE2     |
| 0.75740205  | stable | LOC441632 |
| 0.75740205  | stable | FLJ46109  |
| 0.75740205  | stable | NUP43     |
| 0.75740205  | stable | GPRC5A    |
| 0.75740205  | stable | SLC27A2   |
| 0.75740205  | stable | TBX22     |
| 0.757538957 | stable | CCDC16    |
| 0.757598756 | stable | OR2B11    |
| 0.757598756 | stable | LOC652286 |
| 0.757633676 | stable | OR13C2    |
| 0.757633676 | stable | TSKS      |
| 0.757660528 | stable | RASL10A   |
| 0.757663542 | stable | LOC647946 |
| 0.757771884 | stable | LOC645138 |
| 0.757771884 | stable | ARGFXP2   |
| 0.757771884 | stable | UGT2B15   |
| 0.757771884 | stable | LOC129870 |
| 0.757909309 | stable | WBSCR23   |
| 0.757987762 | stable | LOC650118 |
| 0.757987762 | stable | FLJ42953  |
| 0.75817091  | stable | SCEL      |
| 0.758193163 | stable | OR8B3     |
| 0.758208911 | stable | HSDL1     |
| 0.758208911 | stable | EIF4G3    |
| 0.758208911 | stable | SNORD42B  |
| 0.758212114 | stable | COL1A2    |
| 0.758212114 | stable | LOC652802 |
| 0.758482795 | stable | PPP1R1B   |

DEG.infomation

|             |        |           |
|-------------|--------|-----------|
| 0.758684185 | stable | SEMG1     |
| 0.758684185 | stable | LOC650862 |
| 0.758684185 | stable | KRT83     |
| 0.75869144  | stable | PRKAG2    |
| 0.75869144  | stable | SLC26A10  |
| 0.75869144  | stable | KLHL31    |
| 0.75869144  | stable | MINK1     |
| 0.75869144  | stable | HIVEP3    |
| 0.758786227 | stable | UGT1A1    |
| 0.758928713 | stable | DNM3      |
| 0.758929581 | stable | ZSCAN29   |
| 0.759121675 | stable | LOC641914 |
| 0.759135377 | stable | LOC643583 |
| 0.759135377 | stable | HIST1H2AM |
| 0.759217596 | stable | LOC641972 |
| 0.759239931 | stable | LOC650276 |
| 0.75928494  | stable | NGB       |
| 0.75928494  | stable | LOC731992 |
| 0.759319738 | stable | RAP1GDS1  |
| 0.759380168 | stable | FOXL1     |
| 0.759380168 | stable | RAB21     |
| 0.759486277 | stable | TNK1      |
| 0.759506372 | stable | LOC653526 |
| 0.759514095 | stable | AZI1      |
| 0.759630935 | stable | ATP1A4    |
| 0.75965148  | stable | G6PC2     |
| 0.75965148  | stable | LOC729766 |
| 0.75965148  | stable | CES7      |
| 0.75965148  | stable | IFNE1     |
| 0.75965148  | stable | LOC652401 |
| 0.76042917  | stable | OR56B1    |
| 0.760578529 | stable | LOC441743 |
| 0.760578529 | stable | HTN1      |
| 0.760578529 | stable | LOC654147 |
| 0.760578529 | stable | KRTAP12-4 |
| 0.760816021 | stable | C17ORF55  |
| 0.760816021 | stable | MANEAL    |
| 0.760816021 | stable | LOC442299 |
| 0.760828948 | stable | PTPRCAP   |
| 0.760828948 | stable | NBPF15    |
| 0.760965087 | stable | LOC652463 |
| 0.761041704 | stable | CLEC4E    |
| 0.761087674 | stable | CCDC46    |
| 0.761087674 | stable | TRAIP     |
| 0.761557352 | stable | LOC653472 |
| 0.761653309 | stable | LOC647537 |
| 0.761653309 | stable | ACY1      |
| 0.761653309 | stable | COP1      |
| 0.761653309 | stable | KLK13     |
| 0.761712557 | stable | POU2F3    |
| 0.761860064 | stable | LOC643547 |

DEG.infomation

|             |        |           |
|-------------|--------|-----------|
| 0.761908167 | stable | KLF8      |
| 0.762161529 | stable | WDR65     |
| 0.762174187 | stable | LOC651860 |
| 0.762174187 | stable | ZPBP2     |
| 0.762174187 | stable | LOC647499 |
| 0.762474116 | stable | GPR62     |
| 0.762550895 | stable | TGM4      |
| 0.762550895 | stable | SLC16A2   |
| 0.762588871 | stable | LOC653883 |
| 0.762588871 | stable | DPCR1     |
| 0.762727575 | stable | DEFB106B  |
| 0.762727575 | stable | LOC651868 |
| 0.762777182 | stable | C20ORF112 |
| 0.762789528 | stable | LOC641846 |
| 0.762789528 | stable | LOC654091 |
| 0.762789528 | stable | PCDHGA7   |
| 0.762861937 | stable | LOC644732 |
| 0.762861937 | stable | FAM102B   |
| 0.762861937 | stable | FAM82B    |
| 0.76287994  | stable | LOC643637 |
| 0.76287994  | stable | PDHA2     |
| 0.76287994  | stable | CNTN1     |
| 0.76287994  | stable | SLC25A3   |
| 0.762899375 | stable | KIAA1276  |
| 0.762899375 | stable | TMEM179   |
| 0.762923281 | stable | C6ORF168  |
| 0.762995367 | stable | NDUFS4    |
| 0.763047942 | stable | LOC653567 |
| 0.763213934 | stable | BANP      |
| 0.763213934 | stable | LOC341346 |
| 0.763213934 | stable | LOC642047 |
| 0.763213934 | stable | WASL      |
| 0.763275379 | stable | LOC220115 |
| 0.763290605 | stable | LOC650631 |
| 0.763293523 | stable | SFTPC     |
| 0.763293523 | stable | LOC643986 |
| 0.763293523 | stable | LOC651552 |
| 0.763430998 | stable | CRH       |
| 0.763678696 | stable | C2ORF79   |
| 0.763678696 | stable | LOC649103 |
| 0.763678696 | stable | LOC651022 |
| 0.763678696 | stable | LOC651493 |
| 0.763678696 | stable | PROK1     |
| 0.763678696 | stable | ATP5EP2   |
| 0.763678696 | stable | LOC643322 |
| 0.763678696 | stable | CLCA3     |
| 0.763836677 | stable | DUSP4     |
| 0.763836677 | stable | PAG1      |
| 0.763837476 | stable | SMA5      |
| 0.763837476 | stable | EPYC      |
| 0.763968684 | stable | OR4A5     |

DEG.infomation

|             |        |           |
|-------------|--------|-----------|
| 0.764118163 | stable | MRGPRX3   |
| 0.764262852 | stable | PGP       |
| 0.764264504 | stable | CCT6P1    |
| 0.764264504 | stable | NOG       |
| 0.764404973 | stable | FAM110C   |
| 0.764404973 | stable | LOC648287 |
| 0.764404973 | stable | LOC644197 |
| 0.764404973 | stable | PUSL1     |
| 0.764404973 | stable | LOC649160 |
| 0.764404973 | stable | ANXA3     |
| 0.764404973 | stable | CGB2      |
| 0.764404973 | stable | PRSS33    |
| 0.764404973 | stable | FAM19A1   |
| 0.764471598 | stable | LOC642173 |
| 0.764483715 | stable | GUCY1B3   |
| 0.76449974  | stable | HNRNPA1   |
| 0.76449974  | stable | LOC649524 |
| 0.76449974  | stable | LOC153328 |
| 0.76449974  | stable | LOC399815 |
| 0.76449974  | stable | IL1A      |
| 0.76449974  | stable | C15ORF53  |
| 0.764581432 | stable | PIK3C2A   |
| 0.764592711 | stable | FLJ10374  |
| 0.764616645 | stable | LOC648682 |
| 0.764616645 | stable | TIMM9     |
| 0.764616645 | stable | CHRM1     |
| 0.764616645 | stable | CST5      |
| 0.764841495 | stable | LOC442208 |
| 0.764933923 | stable | MEIS3P1   |
| 0.765123497 | stable | PLCH1     |
| 0.765170983 | stable | SH3BP5    |
| 0.765545152 | stable | TCL6      |
| 0.765600918 | stable | SFTA2     |
| 0.765600918 | stable | EN2       |
| 0.76569573  | stable | LOC643227 |
| 0.765715008 | stable | LOC647706 |
| 0.765715008 | stable | LOC641851 |
| 0.765724293 | stable | LOC400948 |
| 0.765870521 | stable | TAOK3     |
| 0.765956359 | stable | ESPN      |
| 0.765956359 | stable | C9ORF4    |
| 0.765956359 | stable | LOC728973 |
| 0.765956359 | stable | LOC400590 |
| 0.76612357  | stable | LOC653527 |
| 0.766167477 | stable | ZNF793    |
| 0.766182036 | stable | LOC642344 |
| 0.76629702  | stable | ZNF354C   |
| 0.76629702  | stable | LOC652259 |
| 0.766409544 | stable | LOC644773 |
| 0.766409544 | stable | SALL4     |
| 0.766409544 | stable | NWD1      |

## DEG.infomation

|             |        |           |
|-------------|--------|-----------|
| 0.766409544 | stable | GPRC5D    |
| 0.766486194 | stable | PPM1L     |
| 0.766512365 | stable | SSX3      |
| 0.766554957 | stable | KLHL17    |
| 0.76669588  | stable | LOC650849 |
| 0.76669588  | stable | LOC340096 |
| 0.76669588  | stable | LASS3     |
| 0.76669588  | stable | HIST1H4G  |
| 0.76669588  | stable | DDX58     |
| 0.76669588  | stable | KIAA1467  |
| 0.76669588  | stable | EGFR      |
| 0.76669588  | stable | DEFB129   |
| 0.766698113 | stable | MGC39545  |
| 0.766728435 | stable | LOC653100 |
| 0.766735466 | stable | LOC728739 |
| 0.766751963 | stable | PFTK2     |
| 0.766751963 | stable | CUX1      |
| 0.766811064 | stable | LOC648876 |
| 0.766811064 | stable | SYCP1     |
| 0.766811064 | stable | LOC643496 |
| 0.766811064 | stable | LOC387870 |
| 0.766823005 | stable | SHF       |
| 0.766886771 | stable | LOC221136 |
| 0.76690054  | stable | LOC442423 |
| 0.76690054  | stable | LOC644694 |
| 0.76694704  | stable | LOC652417 |
| 0.766981989 | stable | AIM2      |
| 0.767111975 | stable | C6ORF15   |
| 0.767180648 | stable | LOC441032 |
| 0.767282159 | stable | FSCN3     |
| 0.767282159 | stable | C4ORF33   |
| 0.767282159 | stable | LOC645038 |
| 0.767328267 | stable | LOC652602 |
| 0.767453289 | stable | BARX1     |
| 0.767481501 | stable | OR51G1    |
| 0.767481501 | stable | TIGD3     |
| 0.767481501 | stable | LOC389105 |
| 0.767610923 | stable | MARLIN1   |
| 0.767610923 | stable | FLJ46026  |
| 0.767684967 | stable | GJB7      |
| 0.767684967 | stable | LOC652354 |
| 0.767695627 | stable | LOC651789 |
| 0.767695627 | stable | LOC649967 |
| 0.767695627 | stable | LOC339799 |
| 0.767695627 | stable | FAM101A   |
| 0.767695627 | stable | TNFRSF13B |
| 0.767695627 | stable | LOC644402 |
| 0.767695627 | stable | KLK7      |
| 0.767695627 | stable | RCAN3     |
| 0.767695627 | stable | FLJ36848  |
| 0.767831147 | stable | LOC645882 |

## DEG.infomation

|             |        |           |
|-------------|--------|-----------|
| 0.767837886 | stable | LOC652424 |
| 0.767962402 | stable | SUFU      |
| 0.768068562 | stable | LOC339778 |
| 0.768281438 | stable | LIMK1     |
| 0.768281438 | stable | LOC649527 |
| 0.768370947 | stable | TTY9A     |
| 0.768370947 | stable | LOC650159 |
| 0.768370947 | stable | RPS29     |
| 0.768370947 | stable | C1QL2     |
| 0.768370947 | stable | LOC652876 |
| 0.768370947 | stable | TRIM65    |
| 0.768475959 | stable | PRAME     |
| 0.768514046 | stable | OXT       |
| 0.768514046 | stable | ZFP57     |
| 0.768514046 | stable | UGT2B11   |
| 0.768539842 | stable | ABHD8     |
| 0.768544149 | stable | LOC645837 |
| 0.768611305 | stable | MAP3K7IP1 |
| 0.768611305 | stable | RIMBP2    |
| 0.768647041 | stable | CYB5B     |
| 0.768666568 | stable | NEFL      |
| 0.76881041  | stable | LOC642673 |
| 0.76882467  | stable | PSG8      |
| 0.768828428 | stable | LOC650418 |
| 0.768828428 | stable | SPATA9    |
| 0.768828428 | stable | LOC648626 |
| 0.768828428 | stable | BCORL2    |
| 0.768828428 | stable | LOC649264 |
| 0.768970199 | stable | NBPF4     |
| 0.768970199 | stable | PDZK1IP1  |
| 0.76897207  | stable | LOC342918 |
| 0.769012214 | stable | LOC652156 |
| 0.769040305 | stable | LOC642883 |
| 0.769040305 | stable | CASR      |
| 0.769040305 | stable | C10ORF109 |
| 0.769040305 | stable | ZDHHC20   |
| 0.769040305 | stable | LOC730805 |
| 0.769040305 | stable | DEFB4     |
| 0.769040305 | stable | IDUA      |
| 0.769040305 | stable | HPCA      |
| 0.769193077 | stable | KCTD6     |
| 0.769193077 | stable | LOC260340 |
| 0.769193077 | stable | LOC653600 |
| 0.769240985 | stable | LOC732007 |
| 0.769314784 | stable | TTR       |
| 0.769442848 | stable | MRPL17    |
| 0.769479758 | stable | NDE1      |
| 0.769479758 | stable | LOC340602 |
| 0.769479758 | stable | HSP90AB1  |
| 0.769543883 | stable | NPY1R     |
| 0.769975855 | stable | CCDC13    |

## DEG.infomation

|             |        |           |
|-------------|--------|-----------|
| 0.770018768 | stable | LOC284288 |
| 0.770118962 | stable | OR5P3     |
| 0.770277349 | stable | LOC92497  |
| 0.770277349 | stable | ZNF37A    |
| 0.77037192  | stable | LOC652688 |
| 0.770397016 | stable | SALL3     |
| 0.770464653 | stable | SLC22A6   |
| 0.770491396 | stable | NPFFR1    |
| 0.770616437 | stable | CCDC26    |
| 0.770721298 | stable | XIST      |
| 0.770729964 | stable | LOC649952 |
| 0.770979094 | stable | FLJ20712  |
| 0.770979094 | stable | LOC647371 |
| 0.770979094 | stable | LOC644327 |
| 0.771022234 | stable | TXNDC10   |
| 0.771056611 | stable | KCNH8     |
| 0.771117017 | stable | TAC4      |
| 0.771128026 | stable | CABIN1    |
| 0.771220335 | stable | PRSS22    |
| 0.771220335 | stable | GPR110    |
| 0.771220335 | stable | LOC651741 |
| 0.771241843 | stable | C22ORF15  |
| 0.771241843 | stable | C3ORF35   |
| 0.771256864 | stable | PPAP2B    |
| 0.77152814  | stable | LOC644813 |
| 0.771818111 | stable | LOC644613 |
| 0.771818111 | stable | DERA      |
| 0.771862328 | stable | LOC652317 |
| 0.771862328 | stable | C1ORF9    |
| 0.771897868 | stable | LOC654206 |
| 0.771903679 | stable | LOC728946 |
| 0.771922388 | stable | C4ORF26   |
| 0.772090505 | stable | FLJ30719  |
| 0.772185119 | stable | OR52E2    |
| 0.772314207 | stable | PAPD5     |
| 0.772348736 | stable | LOC644330 |
| 0.772348736 | stable | PIGS      |
| 0.772600664 | stable | LOC642341 |
| 0.772600664 | stable | KIAA1257  |
| 0.772628793 | stable | LOC642451 |
| 0.772739752 | stable | NDUFS6    |
| 0.772739752 | stable | LOC653154 |
| 0.772803364 | stable | RGS22     |
| 0.772803364 | stable | FEZF1     |
| 0.772803364 | stable | FER1L5    |
| 0.772803364 | stable | LOC653244 |
| 0.772805472 | stable | LOC150356 |
| 0.772822803 | stable | ZNRF3     |
| 0.772892223 | stable | TREX1     |
| 0.772989643 | stable | GPR85     |
| 0.77300647  | stable | TSNARE1   |



## DEG.infomation

|             |        |           |
|-------------|--------|-----------|
| 0.77302898  | stable | LOC389730 |
| 0.773093769 | stable | CXORF55   |
| 0.773191738 | stable | LOC440558 |
| 0.773191738 | stable | C20ORF195 |
| 0.773191738 | stable | SLC6A11   |
| 0.773236773 | stable | PNLIPRP3  |
| 0.773331887 | stable | DPPA5     |
| 0.77354771  | stable | SMCR8     |
| 0.773638957 | stable | LOC647876 |
| 0.773667076 | stable | LOC139046 |
| 0.773670404 | stable | ARHGAP8   |
| 0.773670404 | stable | PLEKHG2   |
| 0.77375778  | stable | HTR3D     |
| 0.773785769 | stable | TRIM31    |
| 0.773914729 | stable | HSPC105   |
| 0.773941586 | stable | HERPUD2   |
| 0.77409656  | stable | UCN2      |
| 0.774121936 | stable | LOC391730 |
| 0.774206496 | stable | LOC402716 |
| 0.774206496 | stable | TAOK2     |
| 0.774259257 | stable | CHD2      |
| 0.774288198 | stable | LOC647646 |
| 0.774288198 | stable | GIMAP7    |
| 0.774288198 | stable | LOC642408 |
| 0.774288198 | stable | LOC648596 |
| 0.774452418 | stable | SERPINB7  |
| 0.774531053 | stable | IHH       |
| 0.774531053 | stable | LOC647310 |
| 0.77453399  | stable | ANKRD7    |
| 0.774544486 | stable | OR52K2    |
| 0.774565992 | stable | LOC652675 |
| 0.774602133 | stable | C11ORF30  |
| 0.774735804 | stable | ARHGEF16  |
| 0.774836324 | stable | SAR1P3    |
| 0.774866275 | stable | FLJ20674  |
| 0.775110974 | stable | TSSK4     |
| 0.775110974 | stable | CTNNA2    |
| 0.77556793  | stable | FKSG2     |
| 0.775583079 | stable | PLRG1     |
| 0.775629333 | stable | PIGR      |
| 0.77562937  | stable | UBXN7     |
| 0.775678101 | stable | ARID4B    |
| 0.775678101 | stable | NFIL3     |
| 0.775783127 | stable | ZNF81     |
| 0.775783127 | stable | OR10S1    |
| 0.775783127 | stable | LOC440226 |
| 0.775783127 | stable | CLLU1     |
| 0.775812155 | stable | CCT3      |
| 0.775981895 | stable | LOC121792 |
| 0.775983043 | stable | SMYD1     |
| 0.776021729 | stable | RAD51L1   |

## DEG.infomation

|             |        |               |
|-------------|--------|---------------|
| 0.776251931 | stable | HEXIM1        |
| 0.776265338 | stable | LOC651609     |
| 0.776265338 | stable | LOC648153     |
| 0.776265338 | stable | LOC648251     |
| 0.776265338 | stable | CENPP         |
| 0.776290675 | stable | LOC439945     |
| 0.776290675 | stable | GH1           |
| 0.776381388 | stable | CNGB3         |
| 0.776393847 | stable | FOXQ1         |
| 0.776393847 | stable | TERT          |
| 0.776393847 | stable | CCNY          |
| 0.776393847 | stable | HIST1H4I      |
| 0.77648015  | stable | GNG13         |
| 0.77648015  | stable | PTCH2         |
| 0.776533308 | stable | ANP32D        |
| 0.776533308 | stable | LOC283116     |
| 0.776553952 | stable | DKFZP781G0119 |
| 0.776809662 | stable | BPI           |
| 0.776809662 | stable | LOC643672     |
| 0.776809662 | stable | LOC648085     |
| 0.776905744 | stable | LOC648277     |
| 0.777084896 | stable | FABP4         |
| 0.777084896 | stable | FLJ26056      |
| 0.777152069 | stable | SYT3          |
| 0.777291917 | stable | LOC644300     |
| 0.777329165 | stable | TMEM102       |
| 0.777798724 | stable | OR4D11        |
| 0.777827595 | stable | HES2          |
| 0.778034443 | stable | LOC644766     |
| 0.778039509 | stable | LOC643171     |
| 0.778039509 | stable | NBPF14        |
| 0.778039509 | stable | LOC390551     |
| 0.778039509 | stable | WIPI2         |
| 0.778039509 | stable | LOC646503     |
| 0.778039509 | stable | ROR1          |
| 0.778039509 | stable | EIF3D         |
| 0.778039509 | stable | KCNG3         |
| 0.778367884 | stable | C2ORF66       |
| 0.778396805 | stable | LOC647130     |
| 0.778480469 | stable | LOC643614     |
| 0.778569086 | stable | GPR171        |
| 0.778727474 | stable | ZNF157        |
| 0.778727474 | stable | GUCY2F        |
| 0.77895946  | stable | C17ORF51      |
| 0.77896551  | stable | FLT3          |
| 0.779029574 | stable | LOC648775     |
| 0.779075678 | stable | PDLIM2        |
| 0.779090554 | stable | PRAMEF6       |
| 0.779158364 | stable | HPN           |
| 0.779597991 | stable | PLA2G2E       |
| 0.77960611  | stable | C11ORF44      |

## DEG.infomation

|             |        |           |
|-------------|--------|-----------|
| 0.779699101 | stable | LOC649616 |
| 0.779709847 | stable | LOC652454 |
| 0.779740623 | stable | LOC653630 |
| 0.779744884 | stable | FAM3C     |
| 0.779744884 | stable | LOC441316 |
| 0.779744884 | stable | LOC649458 |
| 0.779753997 | stable | AKR1C1    |
| 0.779910219 | stable | TAF6      |
| 0.779955785 | stable | BTN2A3    |
| 0.779955785 | stable | SMYD4     |
| 0.780000467 | stable | DNAJC10   |
| 0.780052396 | stable | LOC647747 |
| 0.780054597 | stable | KRTAP20-1 |
| 0.780054597 | stable | T1560     |
| 0.780054597 | stable | C19ORF30  |
| 0.780054597 | stable | LOC647920 |
| 0.780054597 | stable | MUS81     |
| 0.780054597 | stable | CYP27A1   |
| 0.780054597 | stable | LOC648608 |
| 0.780054597 | stable | PTK2      |
| 0.780054597 | stable | OR1E2     |
| 0.780054597 | stable | TAS2R60   |
| 0.780054597 | stable | LOC400954 |
| 0.780054597 | stable | LOC728765 |
| 0.780054597 | stable | SLC46A1   |
| 0.780054597 | stable | SLC25A4   |
| 0.780054597 | stable | ATG9B     |
| 0.780054597 | stable | C1ORF113  |
| 0.780054597 | stable | C1QTNF3   |
| 0.78023437  | stable | LOC389852 |
| 0.780235995 | stable | LOC643660 |
| 0.780433222 | stable | LOC388906 |
| 0.780444007 | stable | SAMD9L    |
| 0.78047237  | stable | FBXO33    |
| 0.780561254 | stable | MGC24125  |
| 0.780618515 | stable | CFTR      |
| 0.78092261  | stable | LRP2      |
| 0.780930533 | stable | LOC653382 |
| 0.780930533 | stable | MTNR1A    |
| 0.780930533 | stable | PXN       |
| 0.780930533 | stable | C1ORF200  |
| 0.780930533 | stable | OR7E24    |
| 0.780930533 | stable | LOC255411 |
| 0.781113334 | stable | LOC653194 |
| 0.781113334 | stable | HIST1H2AD |
| 0.781113334 | stable | LOC648346 |
| 0.781113334 | stable | APOC4     |
| 0.781143309 | stable | LOC400807 |
| 0.781158859 | stable | USHBP1    |
| 0.781158859 | stable | RAB39B    |
| 0.781158859 | stable | LOC652762 |

DEG.infomation

|             |        |              |
|-------------|--------|--------------|
| 0.781158859 | stable | LOC645402    |
| 0.781158859 | stable | LOC644209    |
| 0.781323596 | stable | SIGLEC15     |
| 0.781323596 | stable | LOC649469    |
| 0.781323596 | stable | UNQ830       |
| 0.781323596 | stable | LOC645835    |
| 0.781323596 | stable | TP53TG5      |
| 0.781323596 | stable | TEPP         |
| 0.781323596 | stable | LOC642718    |
| 0.781323596 | stable | PMCHL2       |
| 0.781323596 | stable | LOC653631    |
| 0.781331782 | stable | C14ORF118    |
| 0.781365619 | stable | PCDHAC1      |
| 0.781390086 | stable | LOC643377    |
| 0.781390086 | stable | ATXN3L       |
| 0.781390086 | stable | FRG2B        |
| 0.781572645 | stable | OR7G3        |
| 0.781632173 | stable | LOC440350    |
| 0.781726415 | stable | APCS         |
| 0.781895485 | stable | LOC643195    |
| 0.781947188 | stable | OR51F1       |
| 0.78197793  | stable | SNORD21      |
| 0.78197793  | stable | STK24        |
| 0.78197793  | stable | DKFZP434M131 |
| 0.782092788 | stable | SPINK5L2     |
| 0.782129844 | stable | LOC644035    |
| 0.782187103 | stable | LOC653536    |
| 0.782284999 | stable | ADH4         |
| 0.782350708 | stable | PCDP1        |
| 0.782350708 | stable | C12ORF37     |
| 0.782451712 | stable | PLA2G1B      |
| 0.782451712 | stable | LOC646310    |
| 0.782638287 | stable | TEAD1        |
| 0.782698196 | stable | NDUFB3       |
| 0.782752971 | stable | C10ORF25     |
| 0.782752971 | stable | FLJ45455     |
| 0.782792031 | stable | FLJ44313     |
| 0.782792031 | stable | KIAA1804     |
| 0.782792031 | stable | TM6SF2       |
| 0.782797114 | stable | FLJ38717     |
| 0.782871313 | stable | FLJ25996     |
| 0.783116029 | stable | ASB12        |
| 0.783116029 | stable | LOC400299    |
| 0.783116029 | stable | LOC650787    |
| 0.783145529 | stable | LOC401305    |
| 0.783145529 | stable | SPTLC3       |
| 0.783174346 | stable | TGM6         |
| 0.783354322 | stable | LOC441554    |
| 0.783354322 | stable | ARL8B        |
| 0.78337768  | stable | LOC650496    |
| 0.783440574 | stable | TIMD4        |

## DEG.infomation

|             |        |           |
|-------------|--------|-----------|
| 0.783440574 | stable | LOC650339 |
| 0.783542833 | stable | DPPA4     |
| 0.78356387  | stable | MAK       |
| 0.78356387  | stable | ZNF575    |
| 0.783660877 | stable | SFRS16    |
| 0.783668467 | stable | DNMT3L    |
| 0.783746451 | stable | MYOD1     |
| 0.783791285 | stable | NGEF      |
| 0.783791285 | stable | LOC645228 |
| 0.783850475 | stable | MRPL38    |
| 0.783887745 | stable | OR2B6     |
| 0.783896047 | stable | LOC729399 |
| 0.784184492 | stable | LOC651834 |
| 0.784184492 | stable | LOC442480 |
| 0.784184492 | stable | LOC642749 |
| 0.784198069 | stable | PRAMEF19  |
| 0.784208946 | stable | MS4A1     |
| 0.784341603 | stable | PPP3R2    |
| 0.784357948 | stable | FAM163B   |
| 0.784381762 | stable | NAALAD2   |
| 0.784381762 | stable | LOC651845 |
| 0.784394934 | stable | LOC401630 |
| 0.784394934 | stable | OPRD1     |
| 0.784394934 | stable | LOC642362 |
| 0.784394934 | stable | SOSTDC1   |
| 0.784394934 | stable | LOC653461 |
| 0.784394934 | stable | LOC644507 |
| 0.784394934 | stable | DCX       |
| 0.784394934 | stable | LOC645393 |
| 0.784398861 | stable | CA5A      |
| 0.784501455 | stable | NDUFAF1   |
| 0.784501455 | stable | C9ORF91   |
| 0.784501455 | stable | LOC644727 |
| 0.784501455 | stable | FAM127A   |
| 0.784501455 | stable | LOC389906 |
| 0.784501455 | stable | BAAT      |
| 0.784557522 | stable | LOC646823 |
| 0.784557522 | stable | FLJ36144  |
| 0.784586773 | stable | GLRA3     |
| 0.784586773 | stable | OR5B17    |
| 0.784586773 | stable | OR2T12    |
| 0.784625362 | stable | LOC254312 |
| 0.784625362 | stable | IGFBP1    |
| 0.784684525 | stable | LOC442064 |
| 0.784684525 | stable | PTK2B     |
| 0.784699699 | stable | FOXO1     |
| 0.784751748 | stable | BTN2A2    |
| 0.784803494 | stable | LOC648123 |
| 0.784803494 | stable | ANUBL1    |
| 0.784804007 | stable | LOC643520 |
| 0.784804007 | stable | BNC2      |

## DEG.infomation

|             |        |           |
|-------------|--------|-----------|
| 0.784839455 | stable | RBMY1A1   |
| 0.78491407  | stable | CCL25     |
| 0.785068915 | stable | PDE6D     |
| 0.785113415 | stable | LOC645176 |
| 0.785257835 | stable | GLOD5     |
| 0.785257835 | stable | LOC648398 |
| 0.785257835 | stable | GAS2L3    |
| 0.785257835 | stable | HTR2C     |
| 0.785257835 | stable | OPALIN    |
| 0.785257835 | stable | MTBP      |
| 0.785257835 | stable | LOC653254 |
| 0.785257835 | stable | SLC2A8    |
| 0.785257835 | stable | LOC643897 |
| 0.785606859 | stable | KRTAP9-8  |
| 0.785635949 | stable | NDNL2     |
| 0.785946925 | stable | LOC645689 |
| 0.786033063 | stable | NRARP     |
| 0.786219364 | stable | LOC649139 |
| 0.78644485  | stable | LOC652673 |
| 0.786469154 | stable | SPRR3     |
| 0.786510831 | stable | LOC646575 |
| 0.786534294 | stable | MASTL     |
| 0.786534294 | stable | RNF213    |
| 0.786728421 | stable | C11ORF85  |
| 0.786793854 | stable | OLR1      |
| 0.786793854 | stable | C7ORF51   |
| 0.786815844 | stable | TAF1A     |
| 0.78692584  | stable | LOC651386 |
| 0.786955801 | stable | LOC646882 |
| 0.786968094 | stable | LOC649337 |
| 0.786968094 | stable | AGAP2     |
| 0.786968094 | stable | FLJ41327  |
| 0.786970422 | stable | PRKCDBP   |
| 0.786985811 | stable | LYZL1     |
| 0.787010192 | stable | OR8U1     |
| 0.787028355 | stable | LOC339209 |
| 0.787070381 | stable | KCND3     |
| 0.78714848  | stable | LOC642356 |
| 0.78714848  | stable | DPP6      |
| 0.78714848  | stable | C12ORF69  |
| 0.787250656 | stable | TMEM126A  |
| 0.787250656 | stable | LOC649942 |
| 0.787258867 | stable | LOC649738 |
| 0.787356976 | stable | KCNV1     |
| 0.787361622 | stable | BMPER     |
| 0.787361622 | stable | LOC642966 |
| 0.787361622 | stable | KIAA0853  |
| 0.787361622 | stable | ITGB7     |
| 0.787367    | stable | FGF6      |
| 0.787397181 | stable | LOC440864 |
| 0.787601385 | stable | LOC342933 |

## DEG.infomation

|             |        |           |
|-------------|--------|-----------|
| 0.787601385 | stable | C12ORF12  |
| 0.787647839 | stable | LOC642176 |
| 0.787647839 | stable | TMC4      |
| 0.787837448 | stable | LOC650796 |
| 0.787870159 | stable | SLC17A6   |
| 0.787877112 | stable | HIST1H4J  |
| 0.787877112 | stable | LOC647500 |
| 0.78792092  | stable | RND2      |
| 0.787974134 | stable | CD9       |
| 0.787974134 | stable | FLJ21511  |
| 0.788026807 | stable | C1ORF151  |
| 0.788035673 | stable | PRM3      |
| 0.788105015 | stable | ENTPD5    |
| 0.788105015 | stable | ETV3L     |
| 0.788109831 | stable | PART1     |
| 0.788109831 | stable | MAP3K15   |
| 0.788109831 | stable | GAGE12G   |
| 0.788109831 | stable | FAM21B    |
| 0.788109831 | stable | LOC642867 |
| 0.788433087 | stable | ZNF611    |
| 0.788464234 | stable | GNAQ      |
| 0.788516064 | stable | TKTL2     |
| 0.78855383  | stable | ATP6V0E2  |
| 0.78855383  | stable | SSX7      |
| 0.78855383  | stable | C6ORF188  |
| 0.788606893 | stable | OR5M3     |
| 0.788606893 | stable | LOC648718 |
| 0.788679331 | stable | LOC653809 |
| 0.788835959 | stable | SETD7     |
| 0.789016157 | stable | ADAMTS4   |
| 0.7891891   | stable | LOC647890 |
| 0.789189149 | stable | SCLY      |
| 0.78918974  | stable | LOC343705 |
| 0.789419872 | stable | PTCH1     |
| 0.789419872 | stable | C1ORF49   |
| 0.789419872 | stable | HAO1      |
| 0.789422522 | stable | TGIF2     |
| 0.789422522 | stable | PAQR5     |
| 0.789441555 | stable | FANCB     |
| 0.789441555 | stable | LOC644806 |
| 0.789441555 | stable | CTNNBIP1  |
| 0.789441555 | stable | LHX6      |
| 0.78944764  | stable | ACSL4     |
| 0.789549096 | stable | PPP2R2A   |
| 0.789561228 | stable | KRTAP21-2 |
| 0.789561228 | stable | NPFF      |
| 0.789728004 | stable | FAM63B    |
| 0.789902589 | stable | LOC648517 |
| 0.789934465 | stable | LOC441070 |
| 0.789941593 | stable | CXCL3     |
| 0.789941593 | stable | LOC644962 |

## DEG.infomation

|             |        |           |
|-------------|--------|-----------|
| 0.789969568 | stable | LOC644829 |
| 0.790056174 | stable | LOC643729 |
| 0.790150895 | stable | LOC649340 |
| 0.790178479 | stable | LOC644373 |
| 0.790178479 | stable | RGSL1     |
| 0.790331959 | stable | LOC643595 |
| 0.790331959 | stable | LOC649858 |
| 0.790331959 | stable | RPP14     |
| 0.790331959 | stable | LOC643577 |
| 0.790331959 | stable | RAG2      |
| 0.790331959 | stable | LOC642866 |
| 0.790331959 | stable | SOST      |
| 0.790331959 | stable | C1ORF215  |
| 0.790331959 | stable | CHRNA     |
| 0.790434948 | stable | DND1      |
| 0.790505441 | stable | GPR111    |
| 0.790579998 | stable | OR7C1     |
| 0.790656525 | stable | AGTR2     |
| 0.790656525 | stable | FLJ42220  |
| 0.790656525 | stable | LOC146909 |
| 0.79078301  | stable | SOX3      |
| 0.790872988 | stable | ZRANB3    |
| 0.790959233 | stable | LOC642817 |
| 0.790959233 | stable | ZDHHC6    |
| 0.790992592 | stable | KCNIP4    |
| 0.790999739 | stable | LOC728242 |
| 0.790999739 | stable | LYPLA1    |
| 0.790999739 | stable | RIMS1     |
| 0.791014603 | stable | LOC440792 |
| 0.791033061 | stable | PLEKHG4B  |
| 0.791125786 | stable | OLIG3     |
| 0.791125786 | stable | FAM84A    |
| 0.791125786 | stable | ATOX1     |
| 0.791125786 | stable | CRYBA4    |
| 0.791125786 | stable | LOC649313 |
| 0.791134062 | stable | LOC729034 |
| 0.791142955 | stable | OR1K1     |
| 0.791154636 | stable | DBF4B     |
| 0.791206437 | stable | LOC338829 |
| 0.791207446 | stable | LOC644586 |
| 0.791227189 | stable | PCDHB7    |
| 0.791227189 | stable | LOC647337 |
| 0.791240544 | stable | LOC652128 |
| 0.791245522 | stable | LOC731501 |
| 0.791361505 | stable | SHC2      |
| 0.791677698 | stable | MFN1      |
| 0.79169682  | stable | LOC649909 |
| 0.79182768  | stable | SPACA3    |
| 0.791885912 | stable | PPFIA3    |
| 0.792084024 | stable | DUSP13    |
| 0.79210877  | stable | HDGFL1    |



DEG.infomation

|             |        |           |
|-------------|--------|-----------|
| 0.79210877  | stable | TMEM200A  |
| 0.792186526 | stable | RHBG      |
| 0.792251854 | stable | C8ORF54   |
| 0.792285069 | stable | LOC401002 |
| 0.792339898 | stable | VTCN1     |
| 0.792339898 | stable | SLFN13    |
| 0.792339898 | stable | LOC645198 |
| 0.792403237 | stable | LOC641942 |
| 0.792403237 | stable | KRTDAP    |
| 0.792429649 | stable | FAM124A   |
| 0.792429649 | stable | LOC642312 |
| 0.792533761 | stable | LOC727922 |
| 0.792533761 | stable | SERINC4   |
| 0.792559031 | stable | MKNK1     |
| 0.792559031 | stable | CHRNA7    |
| 0.792559031 | stable | LOC652530 |
| 0.792559031 | stable | REPIN1    |
| 0.792559031 | stable | OR1S1     |
| 0.792651721 | stable | NUP210L   |
| 0.792651721 | stable | RTBDN     |
| 0.792658128 | stable | C17ORF77  |
| 0.792971372 | stable | LOC644625 |
| 0.792994352 | stable | PSPHL     |
| 0.793218348 | stable | CRY1      |
| 0.793398128 | stable | LOC644038 |
| 0.793461793 | stable | LOC644011 |
| 0.793487807 | stable | LOC442519 |
| 0.793570372 | stable | LOC649101 |
| 0.793570372 | stable | LOC648424 |
| 0.793634548 | stable | NEIL3     |
| 0.793651601 | stable | LOC651704 |
| 0.793686174 | stable | G3BP2     |
| 0.793696027 | stable | LOC400723 |
| 0.793737249 | stable | LOC400236 |
| 0.793737249 | stable | C6ORF97   |
| 0.793749098 | stable | S100A14   |
| 0.793985742 | stable | ZNF208    |
| 0.794027789 | stable | UTF1      |
| 0.794157518 | stable | CSAG3B    |
| 0.794293536 | stable | PPEF2     |
| 0.794411905 | stable | ME1       |
| 0.794422891 | stable | LOC347549 |
| 0.794426821 | stable | CHRNA1    |
| 0.794496682 | stable | LOC641948 |
| 0.794522593 | stable | LOC648628 |
| 0.794559249 | stable | CARD18    |
| 0.794597612 | stable | LOC644623 |
| 0.794703821 | stable | LOC441171 |
| 0.794785637 | stable | LOC653521 |
| 0.794838204 | stable | LOC643866 |
| 0.794863832 | stable | URM1      |

DEG.infomation

|             |        |           |
|-------------|--------|-----------|
| 0.794863832 | stable | SV2B      |
| 0.794863832 | stable | KHDRBS2   |
| 0.794879993 | stable | FLJ14712  |
| 0.794879993 | stable | LOC644031 |
| 0.794879993 | stable | CCKBR     |
| 0.794879993 | stable | FAM19A3   |
| 0.794880687 | stable | LOC651612 |
| 0.794966976 | stable | LOC130576 |
| 0.794966976 | stable | PIK3CG    |
| 0.794966976 | stable | LOC653736 |
| 0.795068181 | stable | PWP2      |
| 0.79516111  | stable | NUP210    |
| 0.79538589  | stable | LOC284232 |
| 0.795470783 | stable | LOC647625 |
| 0.795529974 | stable | HEXDC     |
| 0.795529974 | stable | ZNF714    |
| 0.795529974 | stable | C17ORF38  |
| 0.795529974 | stable | LOC653313 |
| 0.795529974 | stable | LOC652615 |
| 0.795529974 | stable | ATG2A     |
| 0.795529974 | stable | KLHL1     |
| 0.795529974 | stable | LOC648342 |
| 0.795909418 | stable | DMBX1     |
| 0.795910074 | stable | LHB       |
| 0.795910074 | stable | ZNF311    |
| 0.795937386 | stable | FLJ25328  |
| 0.795937386 | stable | PEAR1     |
| 0.795943599 | stable | LOC344741 |
| 0.795978882 | stable | BCL2L14   |
| 0.795989745 | stable | LOC648001 |
| 0.796056749 | stable | LOC644753 |
| 0.796056749 | stable | WBP5      |
| 0.796129729 | stable | LOC648744 |
| 0.796129729 | stable | MAP7D2    |
| 0.796129729 | stable | MYBPC2    |
| 0.796360967 | stable | LOC644208 |
| 0.796409644 | stable | HSD17B6   |
| 0.796809973 | stable | LOC441155 |
| 0.797095604 | stable | LOC283432 |
| 0.797118444 | stable | LOC440292 |
| 0.797236693 | stable | ITIH5L    |
| 0.797256196 | stable | KIAA1024  |
| 0.797256196 | stable | POFUT2    |
| 0.797256196 | stable | SH2D4B    |
| 0.797378221 | stable | LOC731338 |
| 0.797378221 | stable | C14ORF21  |
| 0.797378221 | stable | LOC643102 |
| 0.797378221 | stable | TMEM220   |
| 0.797378221 | stable | LOC346157 |
| 0.797970672 | stable | TMEM155   |
| 0.797970672 | stable | OTUD3     |

## DEG.infomation

|             |        |           |
|-------------|--------|-----------|
| 0.797970672 | stable | LOC647859 |
| 0.79801545  | stable | PNLIPRP1  |
| 0.798116574 | stable | PRSS1     |
| 0.798210136 | stable | LOC650950 |
| 0.798210136 | stable | RNF157    |
| 0.79828138  | stable | LOC652470 |
| 0.79828138  | stable | INCA1     |
| 0.79828138  | stable | LOC646670 |
| 0.79828138  | stable | C7ORF33   |
| 0.79828138  | stable | LOC650990 |
| 0.79831174  | stable | TREML1    |
| 0.798327235 | stable | LOC652662 |
| 0.798327235 | stable | LOC401074 |
| 0.798403519 | stable | PRDM12    |
| 0.798407063 | stable | PCDH8     |
| 0.798486888 | stable | PAEP      |
| 0.798515639 | stable | LOC649971 |
| 0.798523445 | stable | JMJD3     |
| 0.798523445 | stable | FGF14     |
| 0.798523445 | stable | PLXND1    |
| 0.798523445 | stable | LOC644474 |
| 0.798533138 | stable | TCEB1P3   |
| 0.798634846 | stable | LOC648874 |
| 0.798656884 | stable | TCF2      |
| 0.798656884 | stable | TTY8      |
| 0.798656884 | stable | FAM82A1   |
| 0.798656884 | stable | LOC652054 |
| 0.798696295 | stable | OR4D9     |
| 0.798696295 | stable | GPR120    |
| 0.798696295 | stable | KLHL10    |
| 0.798696295 | stable | MAPK8IP2  |
| 0.798696295 | stable | VN1R4     |
| 0.798696295 | stable | ABCC2     |
| 0.798696295 | stable | BST1      |
| 0.798696295 | stable | LOC652849 |
| 0.798696985 | stable | DEFB127   |
| 0.798849439 | stable | PDE6H     |
| 0.798891513 | stable | LOC644311 |
| 0.799047285 | stable | SEPT1     |
| 0.799047285 | stable | NFKBIL1   |
| 0.799130648 | stable | ANTXR1    |
| 0.799173671 | stable | BAI1      |
| 0.799173671 | stable | C6ORF195  |
| 0.799173671 | stable | NUDCD3    |
| 0.799173671 | stable | TTY17A    |
| 0.799230997 | stable | LOC399715 |
| 0.799274978 | stable | LOC653210 |
| 0.799334956 | stable | MRGPRE    |
| 0.799465297 | stable | LOC648138 |
| 0.799543094 | stable | ARSF      |
| 0.79963574  | stable | STK17A    |

## DEG.infomation

|             |        |           |
|-------------|--------|-----------|
| 0.799759969 | stable | DIRC1     |
| 0.799759969 | stable | LOC651923 |
| 0.799759969 | stable | ACOT9     |
| 0.799782789 | stable | LOC652216 |
| 0.799873257 | stable | ORMDL1    |
| 0.800054444 | stable | RFK       |
| 0.800054444 | stable | SLCO6A1   |
| 0.800054444 | stable | FCAMR     |
| 0.800054444 | stable | SCARF1    |
| 0.800054444 | stable | GGT6      |
| 0.800210976 | stable | LOC650387 |
| 0.800532559 | stable | LOC649504 |
| 0.800532559 | stable | HSF2BP    |
| 0.800556575 | stable | FLJ31401  |
| 0.800580004 | stable | C21ORF100 |
| 0.800652384 | stable | LOC392506 |
| 0.800652384 | stable | LOC642506 |
| 0.800652384 | stable | FCHSD1    |
| 0.800697971 | stable | SYNC1     |
| 0.800697971 | stable | LOC646992 |
| 0.800926864 | stable | KRTAP5-2  |
| 0.800959362 | stable | RTKN2     |
| 0.800959362 | stable | FAM3D     |
| 0.800959362 | stable | FAM47B    |
| 0.80108053  | stable | LOC645217 |
| 0.801119437 | stable | LOC646960 |
| 0.801119437 | stable | SLC26A5   |
| 0.801482849 | stable | PCTK2     |
| 0.801550265 | stable | IQUB      |
| 0.801550265 | stable | LOC651301 |
| 0.801550265 | stable | CEACAM4   |
| 0.801550265 | stable | COL17A1   |
| 0.801638301 | stable | CST8      |
| 0.801638301 | stable | ARL5C     |
| 0.802081882 | stable | SLC35D1   |
| 0.802089807 | stable | SLC4A1    |
| 0.802119216 | stable | DLX1      |
| 0.802162417 | stable | CCNB3     |
| 0.802162417 | stable | LOC647544 |
| 0.802184301 | stable | ZCCHC12   |
| 0.802399533 | stable | SLFN5     |
| 0.802399533 | stable | LOC650680 |
| 0.802399533 | stable | AQP8      |
| 0.802427194 | stable | TBX19     |
| 0.802540263 | stable | LOC284998 |
| 0.802540263 | stable | LOC728276 |
| 0.802540263 | stable | MGC27382  |
| 0.802540263 | stable | LOC731196 |
| 0.802540263 | stable | PGLYRP2   |
| 0.802598875 | stable | LOC652656 |
| 0.80268805  | stable | LOC729533 |

DEG.infomation

|             |        |           |
|-------------|--------|-----------|
| 0.802707042 | stable | LOC644596 |
| 0.802707042 | stable | SMS       |
| 0.802967821 | stable | OR4K13    |
| 0.802967821 | stable | GOLGA8E   |
| 0.803620311 | stable | SEPT6     |
| 0.803620311 | stable | LOC642520 |
| 0.803620311 | stable | SOHLH1    |
| 0.803620311 | stable | HSPC072   |
| 0.803620311 | stable | PKNOX1    |
| 0.803631959 | stable | LOC650212 |
| 0.803663586 | stable | HORMAD2   |
| 0.803835283 | stable | FGFBP1    |
| 0.803835283 | stable | LOC644885 |
| 0.803957131 | stable | LOC644593 |
| 0.803957131 | stable | FDPS      |
| 0.804004936 | stable | RAB40A    |
| 0.804004936 | stable | LOC651747 |
| 0.804007707 | stable | LOC641953 |
| 0.804007707 | stable | SLC23A3   |
| 0.804011426 | stable | FAM48B1   |
| 0.804179861 | stable | TMEM145   |
| 0.804213298 | stable | GPR17     |
| 0.804357044 | stable | LOC647865 |
| 0.804357044 | stable | LOC652797 |
| 0.804357044 | stable | LOC649044 |
| 0.804498002 | stable | LOC158318 |
| 0.804516417 | stable | LOC650247 |
| 0.804517254 | stable | CCDC122   |
| 0.804667048 | stable | GABRG1    |
| 0.805087085 | stable | LOC649151 |
| 0.805273526 | stable | LOC642083 |
| 0.805273526 | stable | PRL       |
| 0.805273526 | stable | LOC650399 |
| 0.805273526 | stable | LYSMD3    |
| 0.805274918 | stable | LOC441847 |
| 0.805514841 | stable | RS1       |
| 0.805796347 | stable | KIAA1086  |
| 0.805842775 | stable | TFF2      |
| 0.805930775 | stable | LOC649477 |
| 0.805949959 | stable | LOC644338 |
| 0.806058477 | stable | LOC648585 |
| 0.806061503 | stable | UPK3A     |
| 0.806091202 | stable | LOC392425 |
| 0.806206645 | stable | HSP90AB6P |
| 0.806234533 | stable | CELSR3    |
| 0.806264844 | stable | OR1A2     |
| 0.806271306 | stable | MYO16     |
| 0.806361839 | stable | CALM1     |
| 0.806694805 | stable | OR2S2     |
| 0.806694805 | stable | TCHHL1    |
| 0.80669532  | stable | LOC652690 |

## DEG.infomation

|             |        |           |
|-------------|--------|-----------|
| 0.80669532  | stable | NDUFA1    |
| 0.806822954 | stable | DIS3L2    |
| 0.807026098 | stable | LOC732040 |
| 0.807026098 | stable | CLUL1     |
| 0.807112361 | stable | C11ORF9   |
| 0.807388029 | stable | LOC652542 |
| 0.807534133 | stable | LOC388327 |
| 0.807534133 | stable | LOC729601 |
| 0.807797386 | stable | CCDC108   |
| 0.807946201 | stable | LOC642564 |
| 0.808075595 | stable | INSIG2    |
| 0.808088106 | stable | LOC647237 |
| 0.808088674 | stable | FRG2      |
| 0.808101876 | stable | SULT4A1   |
| 0.808224396 | stable | LOC729792 |
| 0.808224396 | stable | LOC389827 |
| 0.808228565 | stable | LOC651754 |
| 0.808230075 | stable | ABCB11    |
| 0.808230075 | stable | TAF2      |
| 0.808230075 | stable | LOC642948 |
| 0.808359767 | stable | PGLYRP1   |
| 0.808359767 | stable | ZNF831    |
| 0.808466946 | stable | LOC390564 |
| 0.808466946 | stable | LOC652687 |
| 0.808466946 | stable | LOC644411 |
| 0.808512882 | stable | RGS7      |
| 0.808666044 | stable | MBD1      |
| 0.808666044 | stable | LOC644482 |
| 0.808666044 | stable | HTF9C     |
| 0.80876049  | stable | LOC643082 |
| 0.808837091 | stable | PPY       |
| 0.808865837 | stable | OR2M5     |
| 0.809076992 | stable | LOC644371 |
| 0.809076992 | stable | NUFIP1    |
| 0.809081931 | stable | OR5K1     |
| 0.809081931 | stable | LOC646223 |
| 0.80917499  | stable | LOC642720 |
| 0.80917499  | stable | KIAA1958  |
| 0.809297113 | stable | PUNC      |
| 0.809297113 | stable | FLJ43826  |
| 0.80932302  | stable | SPEN      |
| 0.80933785  | stable | LOC651371 |
| 0.809443758 | stable | LOC642141 |
| 0.809443758 | stable | TTY9B     |
| 0.809443758 | stable | LOC653648 |
| 0.809861916 | stable | AFARP1    |
| 0.809861916 | stable | LOC652825 |
| 0.810258026 | stable | LOC642621 |
| 0.81031151  | stable | SAMD7     |
| 0.810355023 | stable | EIF4E     |
| 0.810356337 | stable | GBP4      |

DEG.infomation

|             |        |           |
|-------------|--------|-----------|
| 0.810459404 | stable | DDX49     |
| 0.810526293 | stable | OXER1     |
| 0.810526293 | stable | NUDT9     |
| 0.810591183 | stable | TULP4     |
| 0.810748596 | stable | DEFB112   |
| 0.81078978  | stable | TBX18     |
| 0.810973444 | stable | CXORF22   |
| 0.810973444 | stable | EP400NL   |
| 0.810973444 | stable | ZFAT      |
| 0.810973444 | stable | LOC441237 |
| 0.810989784 | stable | DLG1      |
| 0.810989784 | stable | FOXP3     |
| 0.810989784 | stable | LOC647083 |
| 0.810989784 | stable | LOC643402 |
| 0.810989784 | stable | FLJ32784  |
| 0.810989784 | stable | SLCO1B3   |
| 0.810989784 | stable | ACPL2     |
| 0.810989784 | stable | GJB5      |
| 0.810989784 | stable | LOC650677 |
| 0.810989784 | stable | HLA-DOA   |
| 0.810989784 | stable | NPIP      |
| 0.810989784 | stable | LOC646457 |
| 0.810989784 | stable | BLOC1S3   |
| 0.810989784 | stable | CDY2B     |
| 0.811335016 | stable | PERLD1    |
| 0.811403206 | stable | HS1BP3    |
| 0.811437187 | stable | ABCD2     |
| 0.811437187 | stable | MGC24975  |
| 0.811552503 | stable | MRPL18    |
| 0.811568909 | stable | GRIK5     |
| 0.811568909 | stable | LOC400950 |
| 0.811568909 | stable | SAG       |
| 0.811773732 | stable | LOC644707 |
| 0.811773732 | stable | OR10J5    |
| 0.811773732 | stable | LOC649703 |
| 0.811773732 | stable | LOC653303 |
| 0.811773732 | stable | HSD3B1    |
| 0.811773732 | stable | LOC338750 |
| 0.811773732 | stable | LOC643713 |
| 0.811809712 | stable | LOC285577 |
| 0.811809712 | stable | LOC641999 |
| 0.811809712 | stable | PRIM2A    |
| 0.811846384 | stable | HOXA1     |
| 0.811846384 | stable | NTSR1     |
| 0.811846384 | stable | LOC504188 |
| 0.811846384 | stable | SPANXN4   |
| 0.812025364 | stable | ARL6IP6   |
| 0.812034621 | stable | MAGEA11   |
| 0.812064155 | stable | SHOX      |
| 0.812092214 | stable | FLJ40453  |
| 0.812092214 | stable | LOC729373 |

DEG.infomation

|             |        |           |
|-------------|--------|-----------|
| 0.812395297 | stable | TTC7A     |
| 0.812395297 | stable | TNFSF11   |
| 0.812395297 | stable | LOC646084 |
| 0.812395297 | stable | BRD9      |
| 0.812395297 | stable | PRAMEF12  |
| 0.812432335 | stable | CKMT1A    |
| 0.812501355 | stable | CALML6    |
| 0.812636258 | stable | PRIMA1    |
| 0.812636258 | stable | LOC648262 |
| 0.812680433 | stable | LRRC61    |
| 0.812919849 | stable | LOC643590 |
| 0.812919849 | stable | LOC653706 |
| 0.812919849 | stable | LOC649951 |
| 0.812953723 | stable | IL22RA1   |
| 0.812962325 | stable | FRRS1     |
| 0.81308774  | stable | FNBP1L    |
| 0.813094161 | stable | LOC643905 |
| 0.813311194 | stable | RASA4     |
| 0.81341181  | stable | C19ORF40  |
| 0.813428336 | stable | OR8J3     |
| 0.813428336 | stable | KRT13     |
| 0.813428336 | stable | NR0B1     |
| 0.813428336 | stable | KIR3DL3   |
| 0.813428336 | stable | LOC652292 |
| 0.813432171 | stable | HOXA13    |
| 0.813440473 | stable | C10ORF27  |
| 0.813515716 | stable | PCDHB18   |
| 0.813515716 | stable | CHAT      |
| 0.813515716 | stable | RP1L1     |
| 0.813515716 | stable | PPP1R9B   |
| 0.813627031 | stable | P11       |
| 0.813716399 | stable | CCT8      |
| 0.813735687 | stable | REG3G     |
| 0.813735687 | stable | HIST1H2BO |
| 0.813777229 | stable | LOC650646 |
| 0.813777229 | stable | LOC651577 |
| 0.813777229 | stable | CTAG1A    |
| 0.813777229 | stable | C1ORF166  |
| 0.813819444 | stable | LOC651751 |
| 0.813821015 | stable | SIPA1L2   |
| 0.813857129 | stable | CCDC69    |
| 0.813871194 | stable | LOC647471 |
| 0.813871194 | stable | LOC653625 |
| 0.813871194 | stable | LOC284837 |
| 0.813912039 | stable | POLK      |
| 0.813958976 | stable | IL11      |
| 0.813958976 | stable | LOC644532 |
| 0.813958976 | stable | ADAMTS19  |
| 0.814166717 | stable | CRLF1     |
| 0.814166717 | stable | ZNF696    |
| 0.814166717 | stable | LOC652418 |



## DEG.infomation

|             |        |           |
|-------------|--------|-----------|
| 0.814166717 | stable | C21ORF121 |
| 0.814280264 | stable | LOC651140 |
| 0.814505774 | stable | LOC645946 |
| 0.814505774 | stable | VWA3B     |
| 0.814505774 | stable | NEK4      |
| 0.814505774 | stable | HIP1      |
| 0.814505774 | stable | OR6M1     |
| 0.814505774 | stable | LOC652537 |
| 0.814550261 | stable | LRTM2     |
| 0.814681523 | stable | FAM154A   |
| 0.81475789  | stable | LOC651524 |
| 0.814825991 | stable | TDRKH     |
| 0.814825991 | stable | LOC649107 |
| 0.814906254 | stable | DLX2      |
| 0.815054281 | stable | NEGR1     |
| 0.815223421 | stable | KRTAP12-2 |
| 0.815292462 | stable | LOC93349  |
| 0.815319883 | stable | ANKRD42   |
| 0.815634471 | stable | LOC650227 |
| 0.815634471 | stable | TRIM9     |
| 0.815634471 | stable | MYBL2     |
| 0.815634471 | stable | LOC651324 |
| 0.815988493 | stable | GTF2IRD1  |
| 0.816054161 | stable | RNASE4    |
| 0.816066966 | stable | TEDDM1    |
| 0.816195157 | stable | KIAA0494  |
| 0.816464168 | stable | PC-3      |
| 0.816464168 | stable | BMI1      |
| 0.816464168 | stable | C6ORF208  |
| 0.816464168 | stable | LOC388255 |
| 0.816558418 | stable | SLC16A13  |
| 0.816558418 | stable | LOC148003 |
| 0.816558418 | stable | TRAF4     |
| 0.816558418 | stable | RARS      |
| 0.816558418 | stable | TRIM54    |
| 0.816676136 | stable | LOC642888 |
| 0.816676136 | stable | PTGER1    |
| 0.816676136 | stable | NXF3      |
| 0.816676136 | stable | GTSF1L    |
| 0.816755358 | stable | LOC652582 |
| 0.816803041 | stable | NAIP      |
| 0.816803041 | stable | LOC645777 |
| 0.816803041 | stable | LOC653816 |
| 0.816803041 | stable | ACOT12    |
| 0.817135889 | stable | MUC3B     |
| 0.817177247 | stable | LOC649414 |
| 0.817177247 | stable | LOC644738 |
| 0.81718357  | stable | LOC133874 |
| 0.81718357  | stable | GPD1L     |
| 0.81718357  | stable | FLJ12529  |
| 0.81718357  | stable | LOC643324 |

## DEG.infomation

|             |        |           |
|-------------|--------|-----------|
| 0.81718357  | stable | SLC18A3   |
| 0.81718357  | stable | FAM98B    |
| 0.81718357  | stable | LOC442726 |
| 0.817505644 | stable | LOC646470 |
| 0.817505644 | stable | ARL6IP1   |
| 0.817560832 | stable | LOC653645 |
| 0.817742635 | stable | LOC650458 |
| 0.817915393 | stable | LOC646312 |
| 0.818021365 | stable | LOC644908 |
| 0.818021365 | stable | MLL3      |
| 0.818126762 | stable | OR5AK2    |
| 0.818126762 | stable | LOC645620 |
| 0.818126762 | stable | FOXJ1     |
| 0.818126762 | stable | PRB1      |
| 0.818126762 | stable | OR6X1     |
| 0.818126762 | stable | LOC644715 |
| 0.818132716 | stable | HRNBP3    |
| 0.818176369 | stable | RBMV2FP   |
| 0.818344363 | stable | AKAP5     |
| 0.818507259 | stable | LOC648117 |
| 0.818778815 | stable | SART1     |
| 0.818778815 | stable | IL29      |
| 0.818778815 | stable | LOC643927 |
| 0.818778815 | stable | LOC643604 |
| 0.818778815 | stable | VN1R2     |
| 0.818793059 | stable | LOC646071 |
| 0.818816173 | stable | SASS6     |
| 0.818865784 | stable | LOC727958 |
| 0.818865784 | stable | UEVLD     |
| 0.818865784 | stable | LOC653832 |
| 0.818865784 | stable | C8ORF42   |
| 0.818865784 | stable | PRKAR2B   |
| 0.818865784 | stable | LOC644735 |
| 0.818865784 | stable | LOC643811 |
| 0.819127895 | stable | C14ORF72  |
| 0.819180178 | stable | B3GAT1    |
| 0.819183494 | stable | TPCN2     |
| 0.819220358 | stable | PQLC2     |
| 0.819309661 | stable | GINS4     |
| 0.819393464 | stable | PROCA1    |
| 0.8194915   | stable | LOC646549 |
| 0.819504961 | stable | LOC644345 |
| 0.819504961 | stable | LOC642473 |
| 0.819504961 | stable | AK1       |
| 0.819504961 | stable | LOC642196 |
| 0.819504961 | stable | LOC652512 |
| 0.819620036 | stable | LOC646515 |
| 0.819815982 | stable | LOC646931 |
| 0.819815982 | stable | GPRIN1    |
| 0.819815982 | stable | LOC642922 |
| 0.819815982 | stable | CXCR3     |

## DEG.infomation

|             |        |           |
|-------------|--------|-----------|
| 0.819815982 | stable | LOC388438 |
| 0.819815982 | stable | LOC653111 |
| 0.819815982 | stable | OR1N2     |
| 0.819815982 | stable | MMP26     |
| 0.819815982 | stable | LOC646654 |
| 0.81987676  | stable | CD8B      |
| 0.820125537 | stable | PARD6A    |
| 0.820183737 | stable | KIAA1975  |
| 0.820183737 | stable | LOC651128 |
| 0.820183737 | stable | SLC5A3    |
| 0.820183737 | stable | LOC339524 |
| 0.820183737 | stable | PYDC2     |
| 0.820202752 | stable | TBC1D22A  |
| 0.820322325 | stable | RHBDF1    |
| 0.820366474 | stable | HLA-DRB1  |
| 0.820366474 | stable | PAGE2B    |
| 0.82039574  | stable | TMEM64    |
| 0.820573925 | stable | A1BG      |
| 0.820608951 | stable | LOC645183 |
| 0.820657108 | stable | DUOX2     |
| 0.820667449 | stable | LOC145845 |
| 0.820751818 | stable | MGC15885  |
| 0.821007446 | stable | CCNO      |
| 0.821081013 | stable | LOC645408 |
| 0.821100752 | stable | LOC642639 |
| 0.821135949 | stable | C8ORF13   |
| 0.821146484 | stable | LOC654020 |
| 0.821149501 | stable | TNRC18    |
| 0.8212871   | stable | GYS2      |
| 0.82133867  | stable | PLCL1     |
| 0.82133867  | stable | LOC389834 |
| 0.82133867  | stable | OR2A42    |
| 0.82133867  | stable | KCNJ16    |
| 0.821423333 | stable | LOC650755 |
| 0.821502084 | stable | RILPL1    |
| 0.821502084 | stable | LOC148203 |
| 0.821502084 | stable | NPDC1     |
| 0.821502084 | stable | GAGE7     |
| 0.821502084 | stable | LOC652763 |
| 0.821502084 | stable | CERCAM    |
| 0.821796955 | stable | HSPA9     |
| 0.82188636  | stable | C10ORF107 |
| 0.821960548 | stable | LOC206227 |
| 0.821960548 | stable | DUOXA1    |
| 0.821960548 | stable | LOC440414 |
| 0.822303499 | stable | LOC644830 |
| 0.822413384 | stable | LOC648738 |
| 0.822458279 | stable | LOC650241 |
| 0.822567971 | stable | LOC649086 |
| 0.822567971 | stable | FAM64A    |
| 0.822665652 | stable | HTR5A     |

## DEG.infomation

|             |        |           |
|-------------|--------|-----------|
| 0.822677701 | stable | PARP15    |
| 0.82271421  | stable | SLC4A11   |
| 0.822909996 | stable | LOC646156 |
| 0.823044421 | stable | LOC116349 |
| 0.823095099 | stable | STOML3    |
| 0.823154309 | stable | LOC644982 |
| 0.823154309 | stable | TWIST1    |
| 0.823154309 | stable | OR56A3    |
| 0.823154309 | stable | HIST1H2BJ |
| 0.823243736 | stable | ZNF107    |
| 0.823243736 | stable | FLJ37453  |
| 0.82352465  | stable | LOC647568 |
| 0.823611927 | stable | UFSP1     |
| 0.823634747 | stable | LOC650257 |
| 0.823854923 | stable | LOC127602 |
| 0.823951598 | stable | RNASE11   |
| 0.823969115 | stable | HRNR      |
| 0.823969115 | stable | ABCB5     |
| 0.823969115 | stable | LOC650846 |
| 0.823969115 | stable | TAS2R8    |
| 0.823969115 | stable | LOC651565 |
| 0.824004713 | stable | HYPB      |
| 0.824084633 | stable | OR13C9    |
| 0.824224088 | stable | DAZAP2    |
| 0.824224088 | stable | LOC644891 |
| 0.824224088 | stable | LOC649659 |
| 0.824423346 | stable | SPAM1     |
| 0.824437508 | stable | NMUR1     |
| 0.824490902 | stable | KIR3DP1   |
| 0.824490902 | stable | MGC19604  |
| 0.824490902 | stable | DEPDC6    |
| 0.824728256 | stable | LOC653178 |
| 0.824728256 | stable | SYDE1     |
| 0.824782573 | stable | LOC643495 |
| 0.824782573 | stable | EIF1AD    |
| 0.824827266 | stable | KRTAP26-1 |
| 0.824827266 | stable | C1ORF101  |
| 0.824827266 | stable | GOLGA8G   |
| 0.824827266 | stable | NOX5      |
| 0.824827266 | stable | LOC440992 |
| 0.824827266 | stable | CSNK2A1P  |
| 0.824827266 | stable | C20ORF70  |
| 0.824947776 | stable | CRYGN     |
| 0.824947776 | stable | MGC13098  |
| 0.824947776 | stable | LOC643330 |
| 0.824947776 | stable | RPL30     |
| 0.824947776 | stable | LOC651630 |
| 0.824957619 | stable | LINGO1    |
| 0.824994985 | stable | LOC646407 |
| 0.825011664 | stable | GUCY2D    |
| 0.825135796 | stable | MLANA     |

DEG.infomation

|             |        |           |
|-------------|--------|-----------|
| 0.825135796 | stable | FADS1     |
| 0.825351522 | stable | PARD3B    |
| 0.825466268 | stable | ANKRD31   |
| 0.825716358 | stable | PLGLA1    |
| 0.825742422 | stable | LOC401354 |
| 0.825742422 | stable | SPANXA2   |
| 0.825829568 | stable | PAXIP1    |
| 0.825939902 | stable | USP27X    |
| 0.825951258 | stable | CECR2     |
| 0.825951258 | stable | LOC645552 |
| 0.825951258 | stable | MEIG1     |
| 0.825951258 | stable | PRSS3     |
| 0.825982826 | stable | LOC387646 |
| 0.825982826 | stable | EFCAB6    |
| 0.825982826 | stable | REG3A     |
| 0.825982826 | stable | BIRC1     |
| 0.825982826 | stable | EXTL3     |
| 0.825982826 | stable | C1ORF140  |
| 0.825982826 | stable | OR51A2    |
| 0.825982826 | stable | SLAMF9    |
| 0.825982826 | stable | LOC649990 |
| 0.826043069 | stable | FLJ20920  |
| 0.826149318 | stable | LOC391347 |
| 0.826155457 | stable | LOC650759 |
| 0.826176666 | stable | ACTR3B    |
| 0.826244821 | stable | GOLGA2LY1 |
| 0.826244821 | stable | SPON2     |
| 0.826320805 | stable | SLC26A1   |
| 0.826335253 | stable | LOC653596 |
| 0.826444498 | stable | LOC643787 |
| 0.826444498 | stable | CSN3      |
| 0.826444498 | stable | LOC648456 |
| 0.826446878 | stable | LOC642335 |
| 0.826579651 | stable | ZBTB9     |
| 0.826579651 | stable | LOC652355 |
| 0.826581755 | stable | LOC642509 |
| 0.82666602  | stable | C2ORF56   |
| 0.826667227 | stable | TMEM185A  |
| 0.826714788 | stable | FLJ22531  |
| 0.826725289 | stable | MGAT4C    |
| 0.826725289 | stable | CYP4F2    |
| 0.826733085 | stable | LOC144678 |
| 0.826733085 | stable | C21ORF87  |
| 0.826733085 | stable | ADPRH     |
| 0.826733085 | stable | PRODH     |
| 0.826733085 | stable | TWISTNB   |
| 0.826733085 | stable | PSPC1     |
| 0.826733085 | stable | PTGES3    |
| 0.826733085 | stable | APOC1     |
| 0.826733085 | stable | SLC6A8    |
| 0.826733085 | stable | COL5A2    |

## DEG.infomation

|             |        |           |
|-------------|--------|-----------|
| 0.826845681 | stable | HSD17B3   |
| 0.826845681 | stable | LOC392145 |
| 0.826845681 | stable | FLJ45422  |
| 0.826857446 | stable | C10ORF63  |
| 0.826857446 | stable | TCEAL5    |
| 0.826875572 | stable | DPPA2     |
| 0.826875572 | stable | LOC650488 |
| 0.826900937 | stable | LOC651133 |
| 0.826910213 | stable | LOC645139 |
| 0.826910213 | stable | LOC652575 |
| 0.826910213 | stable | CCL3L1    |
| 0.826910213 | stable | LOC648926 |
| 0.827035281 | stable | HOXC9     |
| 0.827035281 | stable | LOC649618 |
| 0.827162525 | stable | KCNA3     |
| 0.827193159 | stable | SUPT7L    |
| 0.827248725 | stable | LOC647444 |
| 0.827248725 | stable | TTY7      |
| 0.827248725 | stable | LOC645868 |
| 0.827282594 | stable | LOC652211 |
| 0.827282594 | stable | LOC647655 |
| 0.827384205 | stable | LEPROT    |
| 0.827455293 | stable | GGT1      |
| 0.827704191 | stable | LOC646596 |
| 0.827704191 | stable | LOC651774 |
| 0.827704191 | stable | SPEG      |
| 0.827746321 | stable | LOC729197 |
| 0.827760549 | stable | LOC729639 |
| 0.827889892 | stable | UGT1A5    |
| 0.827889892 | stable | LOC649823 |
| 0.827889892 | stable | RHOV      |
| 0.827889892 | stable | VCY       |
| 0.827889892 | stable | GJC3      |
| 0.827889892 | stable | LOC642325 |
| 0.827889892 | stable | LOC642938 |
| 0.827889892 | stable | OR2A20P   |
| 0.82803431  | stable | PANK3     |
| 0.82803431  | stable | LOC646905 |
| 0.828080323 | stable | SPATA1    |
| 0.828080323 | stable | NFASC     |
| 0.828080323 | stable | LOC284296 |
| 0.828080323 | stable | ELMO1     |
| 0.828100498 | stable | LOC650822 |
| 0.828100498 | stable | ISOC2     |
| 0.828100498 | stable | LOC653143 |
| 0.828100498 | stable | LOC651008 |
| 0.828100498 | stable | ZYG11A    |
| 0.828152029 | stable | LOC644047 |
| 0.828352086 | stable | VAX2      |
| 0.828543771 | stable | KIAA0495  |
| 0.828729038 | stable | CUL1      |

## DEG.infomation

|             |        |           |
|-------------|--------|-----------|
| 0.828729038 | stable | ACTL6B    |
| 0.828775559 | stable | LOC651249 |
| 0.828852158 | stable | LOC643300 |
| 0.828999089 | stable | BUB3      |
| 0.829015711 | stable | NBPF5     |
| 0.829015711 | stable | C19ORF55  |
| 0.829015711 | stable | LOC650491 |
| 0.829015711 | stable | C3ORF32   |
| 0.829015711 | stable | NEUROD6   |
| 0.829015711 | stable | FOXD3     |
| 0.829060376 | stable | CXCL13    |
| 0.82907045  | stable | LOC255313 |
| 0.829318488 | stable | TIMM13    |
| 0.829357295 | stable | LOC644165 |
| 0.829357295 | stable | CD244     |
| 0.829470599 | stable | LOC646971 |
| 0.829475359 | stable | FLG       |
| 0.829475359 | stable | CEACAM8   |
| 0.829475359 | stable | LOC650975 |
| 0.829492377 | stable | YKT6      |
| 0.829563541 | stable | LOC642077 |
| 0.829576613 | stable | LOC646887 |
| 0.829742783 | stable | BHLHB2    |
| 0.829826174 | stable | SOX5      |
| 0.829872135 | stable | SPRY3     |
| 0.830029185 | stable | LOC387701 |
| 0.830048576 | stable | HTR3B     |
| 0.830069803 | stable | NETO1     |
| 0.830069803 | stable | USE1      |
| 0.830069803 | stable | OBP2A     |
| 0.830086284 | stable | LOC643449 |
| 0.830160516 | stable | CNTF      |
| 0.830160516 | stable | NLE1      |
| 0.830224051 | stable | FAM71A    |
| 0.830328902 | stable | LOC645769 |
| 0.830453411 | stable | GSC       |
| 0.830704826 | stable | DMRT1     |
| 0.831088502 | stable | ANKRD53   |
| 0.831225263 | stable | LOC645010 |
| 0.831255395 | stable | BCMO1     |
| 0.831405207 | stable | KRT82     |
| 0.831405207 | stable | LOC642106 |
| 0.831405207 | stable | LOC648460 |
| 0.83143197  | stable | CYP2A13   |
| 0.831585958 | stable | GPR135    |
| 0.831585958 | stable | FAS       |
| 0.831585958 | stable | H3F3B     |
| 0.831585958 | stable | LOC651219 |
| 0.831585958 | stable | NBR2      |
| 0.831585958 | stable | LOC643378 |
| 0.831585958 | stable | NXPH3     |

## DEG.infomation

|             |        |           |
|-------------|--------|-----------|
| 0.831585958 | stable | LOC648200 |
| 0.831585958 | stable | LOC390738 |
| 0.831722471 | stable | LOC732226 |
| 0.831722471 | stable | LOC642918 |
| 0.831722471 | stable | C9ORF98   |
| 0.831722471 | stable | TTC9C     |
| 0.831815247 | stable | ADAT1     |
| 0.831815247 | stable | SNX22     |
| 0.832010257 | stable | LOC646246 |
| 0.83201437  | stable | LOC644663 |
| 0.83201437  | stable | LOC400019 |
| 0.83201437  | stable | LOC730841 |
| 0.832018613 | stable | LOC150297 |
| 0.832069171 | stable | IL12B     |
| 0.832069171 | stable | TMEM200B  |
| 0.832069171 | stable | LOC653203 |
| 0.832148175 | stable | FAM62A    |
| 0.832312936 | stable | LOC158257 |
| 0.832328575 | stable | DIAPH3    |
| 0.832332226 | stable | HIST1H4F  |
| 0.83235052  | stable | C2ORF43   |
| 0.83235052  | stable | FNDC8     |
| 0.832446632 | stable | MMP11     |
| 0.832580786 | stable | NUS1      |
| 0.832640857 | stable | E2F1      |
| 0.832640857 | stable | VRK2      |
| 0.832640857 | stable | LOC643133 |
| 0.832644644 | stable | SMEK2     |
| 0.832699373 | stable | CD1A      |
| 0.832699373 | stable | TRIM7     |
| 0.832710759 | stable | LOC650062 |
| 0.832784765 | stable | DFFA      |
| 0.83299598  | stable | DNAH12L   |
| 0.83299598  | stable | AJAP1     |
| 0.83299598  | stable | FAM148A   |
| 0.833203873 | stable | AQP5      |
| 0.833262415 | stable | BMP10     |
| 0.833285249 | stable | LOC732206 |
| 0.83360736  | stable | OR52N2    |
| 0.833636099 | stable | ACMSD     |
| 0.833662185 | stable | C6ORF156  |
| 0.833687726 | stable | LRRC19    |
| 0.833711051 | stable | LOC474170 |
| 0.833743846 | stable | LOC654191 |
| 0.833803729 | stable | LOC653658 |
| 0.833959087 | stable | FAM136A   |
| 0.833999514 | stable | C13ORF16  |
| 0.834122447 | stable | OR10V1    |
| 0.834220309 | stable | LRPPRC    |
| 0.834307307 | stable | PEF1      |
| 0.834307307 | stable | LOC645963 |



## DEG.infomation

|             |        |           |
|-------------|--------|-----------|
| 0.834380551 | stable | CAND1     |
| 0.834381767 | stable | FLJ46836  |
| 0.834381767 | stable | NARG2     |
| 0.834381767 | stable | LOC643284 |
| 0.834388874 | stable | LOC643432 |
| 0.834424092 | stable | DHRS2     |
| 0.834689305 | stable | HOXD4     |
| 0.834689305 | stable | TUSC2     |
| 0.834693176 | stable | LOC643983 |
| 0.834732556 | stable | MIER3     |
| 0.834756009 | stable | LOC344065 |
| 0.834756009 | stable | C8ORF74   |
| 0.834756009 | stable | PTPN20B   |
| 0.834756009 | stable | C20ORF62  |
| 0.834756009 | stable | CIC       |
| 0.834756009 | stable | INSIG1    |
| 0.834756009 | stable | LOC731042 |
| 0.834822384 | stable | C16ORF42  |
| 0.834822384 | stable | DBX1      |
| 0.834822384 | stable | LOC644433 |
| 0.834876076 | stable | LOC441193 |
| 0.834912416 | stable | LOC643089 |
| 0.834912416 | stable | EGLN3     |
| 0.834912416 | stable | SIX2      |
| 0.834912416 | stable | LOC652874 |
| 0.834912416 | stable | LOC642365 |
| 0.834912416 | stable | FLJ14186  |
| 0.834957754 | stable | SLC35F4   |
| 0.834957754 | stable | UGT2B28   |
| 0.834957754 | stable | C6ORF218  |
| 0.834957754 | stable | LOC644372 |
| 0.834957754 | stable | RPL10     |
| 0.834957754 | stable | MLL2      |
| 0.834957754 | stable | LOC644789 |
| 0.835105727 | stable | MRPL37    |
| 0.835180056 | stable | LRRC43    |
| 0.835256273 | stable | SBSN      |
| 0.835256273 | stable | FOXH1     |
| 0.835256273 | stable | INS-IGF2  |
| 0.835256273 | stable | USP32     |
| 0.835256273 | stable | LOC649596 |
| 0.835365562 | stable | XPO1      |
| 0.835429645 | stable | CCDC129   |
| 0.835452037 | stable | C11ORF40  |
| 0.835452037 | stable | LETM2     |
| 0.835452037 | stable | C14ORF104 |
| 0.835452037 | stable | FLJ41733  |
| 0.835452037 | stable | LOC644046 |
| 0.835810391 | stable | OR52I2    |
| 0.835841946 | stable | PTCHD1    |
| 0.835849875 | stable | LOC651821 |

DEG.infomation

|             |        |           |
|-------------|--------|-----------|
| 0.835924802 | stable | RGL3      |
| 0.835998185 | stable | LOC619208 |
| 0.836112515 | stable | LOC649757 |
| 0.836112515 | stable | RNGTT     |
| 0.836212611 | stable | AFP       |
| 0.836212611 | stable | RNU2-1    |
| 0.836254849 | stable | LOC644508 |
| 0.836254849 | stable | LOC652161 |
| 0.836326075 | stable | LOC646870 |
| 0.836507595 | stable | DUSP9     |
| 0.83661476  | stable | PRG-3     |
| 0.836620775 | stable | LOC644958 |
| 0.836643412 | stable | BACH1     |
| 0.83664943  | stable | LOC645040 |
| 0.836701563 | stable | LOC646236 |
| 0.836782572 | stable | LOC150051 |
| 0.836809628 | stable | ITSN2     |
| 0.836809628 | stable | TTY11     |
| 0.837387389 | stable | CNR1      |
| 0.837464968 | stable | IPMK      |
| 0.837510415 | stable | LOC730412 |
| 0.837510415 | stable | CCR8      |
| 0.837561776 | stable | LOC647349 |
| 0.837725057 | stable | FAM59B    |
| 0.837725057 | stable | LOC645445 |
| 0.837725057 | stable | DGKZ      |
| 0.837741266 | stable | LOC646560 |
| 0.837741266 | stable | LOC641982 |
| 0.837741266 | stable | CAMK2N2   |
| 0.837741266 | stable | LOC644377 |
| 0.837741266 | stable | UTRN      |
| 0.837864768 | stable | ADCK1     |
| 0.83790413  | stable | PPIC      |
| 0.838003719 | stable | AADACL2   |
| 0.838022183 | stable | LOC391427 |
| 0.83809323  | stable | LOC644714 |
| 0.838296122 | stable | TRIM75    |
| 0.838383751 | stable | DTWD1     |
| 0.838405234 | stable | SNORD38B  |
| 0.838451644 | stable | ZNF862    |
| 0.838482405 | stable | FLJ21687  |
| 0.838482405 | stable | LOC644361 |
| 0.838482405 | stable | TRIM60    |
| 0.838482405 | stable | LOC390811 |
| 0.838482405 | stable | C4ORF7    |
| 0.838482405 | stable | TAS2R16   |
| 0.838482405 | stable | LOC643039 |
| 0.838482405 | stable | LOC646906 |
| 0.838482405 | stable | CSRP2     |
| 0.838482405 | stable | LOXL1     |
| 0.838482405 | stable | LOC642853 |

## DEG.infomation

|             |        |           |
|-------------|--------|-----------|
| 0.838482405 | stable | BRF1      |
| 0.83854832  | stable | LOC647306 |
| 0.838667925 | stable | IFNA2     |
| 0.838667925 | stable | STUB1     |
| 0.838667925 | stable | LOC196120 |
| 0.838667925 | stable | C10ORF128 |
| 0.838667925 | stable | OR2AE1    |
| 0.838794303 | stable | GNG8      |
| 0.838794303 | stable | LOC644151 |
| 0.838794303 | stable | CYP2A6    |
| 0.838794303 | stable | C6ORF10   |
| 0.838794303 | stable | HBS1L     |
| 0.838794303 | stable | MCM6      |
| 0.838794303 | stable | LOC651286 |
| 0.838794303 | stable | C2ORF19   |
| 0.838794303 | stable | LOC402677 |
| 0.838794895 | stable | YSK4      |
| 0.838861476 | stable | LOC441340 |
| 0.838920617 | stable | GBAP      |
| 0.839065569 | stable | DTYMK     |
| 0.83907288  | stable | KIAA0913  |
| 0.839142997 | stable | LOC644865 |
| 0.839142997 | stable | PRR4      |
| 0.839142997 | stable | LOC654115 |
| 0.839142997 | stable | LOC642851 |
| 0.839142997 | stable | OR4C3     |
| 0.839142997 | stable | FOX2      |
| 0.83915067  | stable | LOC646653 |
| 0.839204858 | stable | HIF3A     |
| 0.839204858 | stable | OR6A2     |
| 0.839204858 | stable | NSUN5     |
| 0.839204858 | stable | LOC400455 |
| 0.839400139 | stable | SCAMP1    |
| 0.83943551  | stable | CNOT8     |
| 0.839541607 | stable | WFDC12    |
| 0.839541607 | stable | RBM11     |
| 0.839541607 | stable | C10ORF95  |
| 0.839556794 | stable | KRT25     |
| 0.839707423 | stable | LOC652217 |
| 0.839759438 | stable | LOC645307 |
| 0.839856505 | stable | CHRNA3    |
| 0.839856505 | stable | TXNDC3    |
| 0.839955119 | stable | LOC643373 |
| 0.839955119 | stable | KRT33A    |
| 0.840110101 | stable | GSDMA     |
| 0.840111442 | stable | TMPRSS9   |
| 0.84019666  | stable | EMR3      |
| 0.840221587 | stable | LOC644183 |
| 0.840223422 | stable | OPCML     |
| 0.840223422 | stable | LOC729012 |
| 0.840223422 | stable | ZNF700    |

## DEG.infomation

|             |        |           |
|-------------|--------|-----------|
| 0.840223422 | stable | BCKDK     |
| 0.840223422 | stable | OR52E8    |
| 0.840223422 | stable | LOC648502 |
| 0.840223422 | stable | LOC653166 |
| 0.840223422 | stable | CDKL1     |
| 0.840223422 | stable | MAP1LC3C  |
| 0.840241757 | stable | LOC441454 |
| 0.840241757 | stable | LOC644166 |
| 0.840241757 | stable | LOC642675 |
| 0.840241757 | stable | TCTE1     |
| 0.840241757 | stable | PSMB2     |
| 0.840277311 | stable | AGBL1     |
| 0.840277311 | stable | ZC3H11A   |
| 0.840277311 | stable | ZNF274    |
| 0.840472337 | stable | GUCY2E    |
| 0.840583082 | stable | UGT1A6    |
| 0.8406533   | stable | TIAL1     |
| 0.840950681 | stable | KRT2      |
| 0.840950681 | stable | TAF5      |
| 0.841392383 | stable | LOC728904 |
| 0.841460156 | stable | LOC441296 |
| 0.841460156 | stable | LOC651648 |
| 0.841721399 | stable | GCGR      |
| 0.841754976 | stable | LOC642449 |
| 0.841754976 | stable | CETN1     |
| 0.841880942 | stable | TAF10     |
| 0.84188734  | stable | LOC652563 |
| 0.841890817 | stable | SLBP      |
| 0.841890817 | stable | WDR17     |
| 0.841920168 | stable | ANKRD20A3 |
| 0.841920168 | stable | PLA2G6    |
| 0.841933118 | stable | SPATA12   |
| 0.841933118 | stable | LOC93556  |
| 0.841933118 | stable | LOC645649 |
| 0.841933118 | stable | LOC649999 |
| 0.841933118 | stable | ZNF526    |
| 0.841933118 | stable | INGX      |
| 0.841933118 | stable | LOC643703 |
| 0.841976062 | stable | LOC652492 |
| 0.841976062 | stable | LOC649350 |
| 0.842036075 | stable | PP8961    |
| 0.842038741 | stable | RHD       |
| 0.842064097 | stable | LOC728951 |
| 0.842226331 | stable | FOXN4     |
| 0.842305131 | stable | FLJ27365  |
| 0.842337412 | stable | RNASE9    |
| 0.842337412 | stable | SYT10     |
| 0.842348418 | stable | LOC147670 |
| 0.842387031 | stable | SYT8      |
| 0.842438346 | stable | LOC730413 |
| 0.842438346 | stable | CYP4A22   |

DEG.infomation

|             |        |            |
|-------------|--------|------------|
| 0.842438346 | stable | PPM1D      |
| 0.842545377 | stable | CBLN3      |
| 0.842545377 | stable | CYORF15B   |
| 0.842744584 | stable | KLF17      |
| 0.842802389 | stable | LOC727775  |
| 0.842896354 | stable | LOC147650  |
| 0.842896354 | stable | C14ORF39   |
| 0.843170753 | stable | C20ORF79   |
| 0.843170753 | stable | HECA       |
| 0.84323101  | stable | FLJ46284   |
| 0.84332749  | stable | UBE2CBP    |
| 0.84345858  | stable | LOC647357  |
| 0.84345858  | stable | LOC642434  |
| 0.84345858  | stable | MLXIP      |
| 0.843464929 | stable | FCRL6      |
| 0.843506096 | stable | LRIT2      |
| 0.843506096 | stable | C11ORF77   |
| 0.843506096 | stable | SLPI       |
| 0.843615365 | stable | CCDC9      |
| 0.843714574 | stable | LOC649944  |
| 0.843772297 | stable | KRT78      |
| 0.843772297 | stable | C14ORF166B |
| 0.843772297 | stable | SLC33A1    |
| 0.843779607 | stable | BAG1       |
| 0.843786672 | stable | C1ORF182   |
| 0.843938465 | stable | MAGEC1     |
| 0.843957171 | stable | MSX2       |
| 0.843957171 | stable | LOC650407  |
| 0.843957171 | stable | IRF4       |
| 0.843957171 | stable | C12ORF31   |
| 0.843957171 | stable | LOC91948   |
| 0.843957171 | stable | SLC39A6    |
| 0.843957171 | stable | C19ORF34   |
| 0.843957171 | stable | LOC652777  |
| 0.844153471 | stable | SNHG5      |
| 0.844190202 | stable | MIPOL1     |
| 0.844190202 | stable | EME2       |
| 0.844259582 | stable | LOC643047  |
| 0.844293183 | stable | HES7       |
| 0.844293183 | stable | CNTD1      |
| 0.844293183 | stable | LDOC1L     |
| 0.844293183 | stable | LOC283398  |
| 0.844293183 | stable | GTSE1      |
| 0.844342945 | stable | SDC1       |
| 0.844342945 | stable | LOC646429  |
| 0.844458532 | stable | MUC5AC     |
| 0.844496983 | stable | AMELX      |
| 0.844506054 | stable | LOC650594  |
| 0.844513196 | stable | KLHL9      |
| 0.844513196 | stable | RPS26      |
| 0.844667416 | stable | OR8U9      |

DEG.infomation

|             |        |           |
|-------------|--------|-----------|
| 0.844667416 | stable | LOC642420 |
| 0.844667416 | stable | LOC642762 |
| 0.844667416 | stable | LCN8      |
| 0.844730116 | stable | LOC401268 |
| 0.844730116 | stable | C17ORF66  |
| 0.844915762 | stable | VNN1      |
| 0.844915762 | stable | LOC256483 |
| 0.844915762 | stable | MAG       |
| 0.845013012 | stable | LOC339529 |
| 0.845048886 | stable | RGSL2     |
| 0.845048886 | stable | APC2      |
| 0.845224866 | stable | LOC652562 |
| 0.845342721 | stable | HDLBP     |
| 0.845342721 | stable | FAM71C    |
| 0.845434567 | stable | SETD1A    |
| 0.845434567 | stable | EFHC2     |
| 0.845521655 | stable | FAM108A1  |
| 0.84558941  | stable | OPN1LW    |
| 0.84558941  | stable | ADAM9     |
| 0.845657328 | stable | LOC642743 |
| 0.845686437 | stable | GPC3      |
| 0.845686437 | stable | KRTAP2-2  |
| 0.845694459 | stable | LOC650852 |
| 0.845712952 | stable | IL17C     |
| 0.845712952 | stable | WDR82     |
| 0.845712952 | stable | LOC442606 |
| 0.845712952 | stable | NCR2      |
| 0.845957364 | stable | PHTF2     |
| 0.845957364 | stable | PRDM14    |
| 0.846168607 | stable | MMAA      |
| 0.846190692 | stable | LOC648733 |
| 0.846290373 | stable | GALNT2    |
| 0.846290373 | stable | KCTD9     |
| 0.846290373 | stable | LOC649324 |
| 0.846290373 | stable | LOC644257 |
| 0.846290373 | stable | FAM119A   |
| 0.846290373 | stable | MYO3A     |
| 0.846290373 | stable | LOC642515 |
| 0.846290373 | stable | LOC644733 |
| 0.846344215 | stable | POLN      |
| 0.846422523 | stable | LOC645033 |
| 0.846422523 | stable | MOGAT1    |
| 0.84647514  | stable | GPR125    |
| 0.84647514  | stable | LOC643320 |
| 0.84647514  | stable | KCNG4     |
| 0.84647514  | stable | GYPE      |
| 0.84647514  | stable | LOC646649 |
| 0.84647514  | stable | WBP11     |
| 0.846478414 | stable | LOC651614 |
| 0.846478414 | stable | UBE2B     |
| 0.84654533  | stable | LOC284274 |

DEG.infomation

|             |        |           |
|-------------|--------|-----------|
| 0.84658306  | stable | LCE3C     |
| 0.84658306  | stable | BAGE5     |
| 0.84658306  | stable | LOC642914 |
| 0.84658306  | stable | TGM1      |
| 0.84658306  | stable | LOC648476 |
| 0.846707634 | stable | FLJ13224  |
| 0.846707634 | stable | OR56A1    |
| 0.846786255 | stable | LOC441294 |
| 0.846852701 | stable | GAGE1     |
| 0.846852701 | stable | OVOS      |
| 0.8469289   | stable | LOC653241 |
| 0.8469289   | stable | TMPRSS11F |
| 0.847005971 | stable | FLJ36166  |
| 0.847005971 | stable | PGCP      |
| 0.847073484 | stable | PAK3      |
| 0.847103299 | stable | CLCN4     |
| 0.847138256 | stable | RFPL1S    |
| 0.847150942 | stable | ARMC2     |
| 0.847337763 | stable | LOC651711 |
| 0.847654741 | stable | LOC652062 |
| 0.847657989 | stable | HPSE2     |
| 0.847734219 | stable | ZNF280C   |
| 0.847770628 | stable | LOC651280 |
| 0.847837012 | stable | LOC646023 |
| 0.847893843 | stable | MOBK1B    |
| 0.847893843 | stable | TAS2R39   |
| 0.847943286 | stable | ACTL8     |
| 0.84800118  | stable | GSG1      |
| 0.84800118  | stable | GAGE12I   |
| 0.848013282 | stable | BMX       |
| 0.848013282 | stable | LOC652768 |
| 0.848130029 | stable | OR511     |
| 0.84828808  | stable | TBX6      |
| 0.848327554 | stable | LOC654189 |
| 0.848387043 | stable | CPA6      |
| 0.848558595 | stable | LOC730099 |
| 0.84869962  | stable | LOC647481 |
| 0.84869962  | stable | LOC650612 |
| 0.848701746 | stable | FXVD7     |
| 0.848701746 | stable | PRPF40A   |
| 0.848701746 | stable | MAP3K7IP2 |
| 0.848701746 | stable | PRB2      |
| 0.848701746 | stable | R3HCC1    |
| 0.848701746 | stable | SMTN      |
| 0.848724353 | stable | PHF16     |
| 0.848872941 | stable | IMPG1     |
| 0.848977105 | stable | LOC401152 |
| 0.848992876 | stable | INSL3     |
| 0.849122876 | stable | HSPB2     |
| 0.849122876 | stable | G0S2      |
| 0.849151634 | stable | DUSP10    |

## DEG.infomation

|             |        |           |
|-------------|--------|-----------|
| 0.849151634 | stable | LOC642761 |
| 0.849162212 | stable | AADAC     |
| 0.849185413 | stable | MOV10L1   |
| 0.849185413 | stable | LOC347119 |
| 0.849185413 | stable | OR10Q1    |
| 0.849185413 | stable | S100A1L   |
| 0.849185413 | stable | FAM55B    |
| 0.84918632  | stable | LOC645104 |
| 0.849211731 | stable | LOC654340 |
| 0.849235364 | stable | CALB1     |
| 0.849235364 | stable | INSL5     |
| 0.849235364 | stable | LOC389442 |
| 0.849263612 | stable | LOC340069 |
| 0.849263612 | stable | LOC642008 |
| 0.849263612 | stable | FAM154B   |
| 0.849263612 | stable | FOLR1     |
| 0.849263612 | stable | LOC648222 |
| 0.849352119 | stable | RAD23B    |
| 0.849352119 | stable | LOC644650 |
| 0.849438921 | stable | TRAF3IP3  |
| 0.84945671  | stable | OR3A2     |
| 0.849649956 | stable | C1ORF135  |
| 0.849798772 | stable | SUV420H1  |
| 0.849876071 | stable | C14ORF181 |
| 0.849876071 | stable | C10ORF88  |
| 0.849916055 | stable | LOC652305 |
| 0.849940557 | stable | SOX21     |
| 0.849940557 | stable | RSPO4     |
| 0.849940557 | stable | LOC648801 |
| 0.849940557 | stable | LOC643938 |
| 0.849940557 | stable | RASGRF1   |
| 0.849947577 | stable | ANXA8     |
| 0.849947577 | stable | FAAH2     |
| 0.849985373 | stable | LOC642607 |
| 0.850098289 | stable | HRH1      |
| 0.850098289 | stable | PNPO      |
| 0.850415269 | stable | SLC22A1   |
| 0.850483876 | stable | PRUNE2    |
| 0.850483876 | stable | ZNF229    |
| 0.850483876 | stable | MYO15B    |
| 0.850483876 | stable | RAET1L    |
| 0.850483876 | stable | POU4F3    |
| 0.850483876 | stable | STAC3     |
| 0.850483876 | stable | LOC649198 |
| 0.850483876 | stable | LOC389422 |
| 0.850483876 | stable | RPA2      |
| 0.850483876 | stable | UPRT      |
| 0.850483876 | stable | ADAM7     |
| 0.850483876 | stable | TAS2R44   |
| 0.850483876 | stable | LOC643017 |
| 0.850590799 | stable | INHBB     |



DEG.infomation

|             |        |               |
|-------------|--------|---------------|
| 0.850590799 | stable | LOC645391     |
| 0.850590799 | stable | LOC168474     |
| 0.850590799 | stable | LOC440910     |
| 0.850590799 | stable | OR6C6         |
| 0.850599903 | stable | LOC647634     |
| 0.850599903 | stable | LOC730952     |
| 0.850724575 | stable | DMP1          |
| 0.85088672  | stable | CYP2W1        |
| 0.85117869  | stable | LOC389267     |
| 0.85117869  | stable | GSTT1         |
| 0.85140843  | stable | CDC6          |
| 0.851457964 | stable | TCF7L1        |
| 0.851457964 | stable | LOC654088     |
| 0.85158674  | stable | NDRG3         |
| 0.851646531 | stable | FLJ12078      |
| 0.851698028 | stable | LOC132707     |
| 0.851698028 | stable | SPG21         |
| 0.851698028 | stable | OR1L4         |
| 0.851698028 | stable | PCDHA9        |
| 0.851698028 | stable | LOC652551     |
| 0.851708328 | stable | FASTK         |
| 0.851822627 | stable | RUFY3         |
| 0.851877444 | stable | ASTL          |
| 0.851902353 | stable | GDF1          |
| 0.851904998 | stable | TBC1D23       |
| 0.851918068 | stable | CXORF30       |
| 0.851918068 | stable | PGLYRP4       |
| 0.851918068 | stable | LOC728137     |
| 0.851918068 | stable | MUCL1         |
| 0.851918068 | stable | LOC644756     |
| 0.851918068 | stable | ENTPD1        |
| 0.851943338 | stable | DUOX1         |
| 0.851943338 | stable | DKFZP686J0529 |
| 0.851943338 | stable | BUB1B         |
| 0.852042495 | stable | SLC37A3       |
| 0.852042495 | stable | LOC653189     |
| 0.852042495 | stable | KRTAP21-1     |
| 0.852042495 | stable | SSX8          |
| 0.852042495 | stable | LOC648359     |
| 0.852042495 | stable | LOC651515     |
| 0.852042495 | stable | PAPOLB        |
| 0.852042495 | stable | OR52K1        |
| 0.852042495 | stable | COL9A3        |
| 0.852052956 | stable | FTCD          |
| 0.852130157 | stable | SLC2A7        |
| 0.852130157 | stable | C21ORF58      |
| 0.852189481 | stable | DPYSL5        |
| 0.852194958 | stable | FLJ30679      |
| 0.852225491 | stable | MAP3K7IP3     |
| 0.852290598 | stable | LTK           |
| 0.85232577  | stable | LOC649587     |

DEG.infomation

|             |        |           |
|-------------|--------|-----------|
| 0.85232577  | stable | GIMAP2    |
| 0.85232577  | stable | DMRTC2    |
| 0.85232577  | stable | KRTAP1-5  |
| 0.85232577  | stable | TSPY2     |
| 0.85232577  | stable | ARHGEF5   |
| 0.852353404 | stable | OR52R1    |
| 0.852593466 | stable | LOC645208 |
| 0.852593466 | stable | LOC647361 |
| 0.852593466 | stable | TXNDC6    |
| 0.852593466 | stable | BTN2A1    |
| 0.852593466 | stable | ERGIC2    |
| 0.852611048 | stable | LOC286467 |
| 0.852618234 | stable | LRRC52    |
| 0.852618325 | stable | NCAPH     |
| 0.852618325 | stable | LOC648834 |
| 0.852652936 | stable | PDLIM4    |
| 0.852752808 | stable | LOC642475 |
| 0.852756135 | stable | TTN       |
| 0.852756135 | stable | LOC342897 |
| 0.852756135 | stable | ZFHX2     |
| 0.852919959 | stable | LOC653581 |
| 0.852919959 | stable | LOC652499 |
| 0.852919959 | stable | LOC652677 |
| 0.852919959 | stable | LOC643584 |
| 0.852919959 | stable | PTPN20A   |
| 0.852919959 | stable | KRTAP9-3  |
| 0.852919959 | stable | LOC649144 |
| 0.852919959 | stable | C9ORF57   |
| 0.852919959 | stable | LOC642776 |
| 0.852919959 | stable | LOC642832 |
| 0.852919959 | stable | LOC643993 |
| 0.852919959 | stable | LOC392781 |
| 0.852919959 | stable | LOC647229 |
| 0.852919959 | stable | CCDC114   |
| 0.852919959 | stable | OLIG1     |
| 0.852919959 | stable | AKAP14    |
| 0.852919959 | stable | LOC400298 |
| 0.852919959 | stable | CDX2      |
| 0.852919959 | stable | LOC643634 |
| 0.852919959 | stable | LOC642707 |
| 0.852919959 | stable | RNASE10   |
| 0.852919959 | stable | LOC653286 |
| 0.852919959 | stable | LOC647134 |
| 0.853149505 | stable | PMP2      |
| 0.853169583 | stable | LOC284988 |
| 0.853210645 | stable | FBXO36    |
| 0.853260409 | stable | FAM75A7   |
| 0.853260409 | stable | CCHCR1    |
| 0.853426669 | stable | LOC647493 |
| 0.853510119 | stable | RNF13     |
| 0.853539263 | stable | C10ORF118 |

DEG.infomation

|             |        |           |
|-------------|--------|-----------|
| 0.853539263 | stable | LOC646769 |
| 0.853539263 | stable | LOC139542 |
| 0.853539263 | stable | PRY2      |
| 0.853539263 | stable | GTF3A     |
| 0.853660447 | stable | UPK2      |
| 0.853660447 | stable | LOC644215 |
| 0.853660447 | stable | DUX2      |
| 0.853660447 | stable | LOC642000 |
| 0.85370246  | stable | HIST1H4A  |
| 0.853810804 | stable | OR51B6    |
| 0.853832927 | stable | LOC648374 |
| 0.853832927 | stable | PDYN      |
| 0.853832927 | stable | PCDHGB5   |
| 0.853832927 | stable | HELB      |
| 0.853832927 | stable | DEFB111   |
| 0.853832927 | stable | WDR31     |
| 0.853832927 | stable | LOC651075 |
| 0.853847508 | stable | LOC641858 |
| 0.853847508 | stable | PSG1      |
| 0.853847508 | stable | MAMDC4    |
| 0.853847508 | stable | LOC648154 |
| 0.853847508 | stable | LOC646680 |
| 0.853847508 | stable | ZADH2     |
| 0.853847508 | stable | EFCAB4B   |
| 0.853847508 | stable | TGFB1     |
| 0.853911171 | stable | LOC653787 |
| 0.854001069 | stable | OR2V2     |
| 0.854153877 | stable | OVOS2     |
| 0.854232467 | stable | LOC648309 |
| 0.854232467 | stable | REG1B     |
| 0.854244599 | stable | C17ORF73  |
| 0.854428116 | stable | LOC645123 |
| 0.854435562 | stable | NKX2-3    |
| 0.854435562 | stable | LOC647802 |
| 0.854445945 | stable | IGSF9B    |
| 0.854445945 | stable | LOC643702 |
| 0.854445945 | stable | MC5R      |
| 0.854491888 | stable | IGSF9     |
| 0.854543461 | stable | LRTM1     |
| 0.854543461 | stable | LOC646706 |
| 0.854667896 | stable | CCL1      |
| 0.854818925 | stable | OR2M1P    |
| 0.854886914 | stable | FBXL18    |
| 0.854898996 | stable | OR52E5    |
| 0.854898996 | stable | CHD3      |
| 0.854898996 | stable | LOC388333 |
| 0.854898996 | stable | OR6Q1     |
| 0.855097783 | stable | LOC642169 |
| 0.855097783 | stable | CTTNBP2   |
| 0.855097783 | stable | ZAR1      |
| 0.855097783 | stable | C1ORF52   |

## DEG.infomation

|             |        |           |
|-------------|--------|-----------|
| 0.855097783 | stable | LOC646631 |
| 0.855097783 | stable | LOC643428 |
| 0.855097783 | stable | LOC643285 |
| 0.855097783 | stable | CTRL      |
| 0.855097783 | stable | LOC642965 |
| 0.855097783 | stable | TTC22     |
| 0.855097783 | stable | COMMD7    |
| 0.855097783 | stable | MAGEA4    |
| 0.855309253 | stable | LOC648761 |
| 0.855580001 | stable | INSR      |
| 0.855580001 | stable | LOC648859 |
| 0.855580001 | stable | AMPD1     |
| 0.855870503 | stable | LOC649379 |
| 0.856010553 | stable | LOC650013 |
| 0.856010553 | stable | NBR1      |
| 0.856010553 | stable | LOC653789 |
| 0.856042821 | stable | SLC36A3   |
| 0.856042821 | stable | LOC649747 |
| 0.856086685 | stable | LOC648689 |
| 0.856140803 | stable | LOC652290 |
| 0.856219483 | stable | KRTAP5-11 |
| 0.856234931 | stable | LOC643406 |
| 0.856297276 | stable | LOC642633 |
| 0.856367796 | stable | CYP27C1   |
| 0.85643955  | stable | UGT2B10   |
| 0.856484811 | stable | LOC646812 |
| 0.856528016 | stable | LOC541473 |
| 0.856548716 | stable | CEACAM6   |
| 0.856548716 | stable | ZSCAN22   |
| 0.856548716 | stable | EXOSC10   |
| 0.856548716 | stable | TPT1      |
| 0.856548716 | stable | CKMT2     |
| 0.856548716 | stable | LOC650341 |
| 0.856548716 | stable | GABRD     |
| 0.856702712 | stable | C6ORF64   |
| 0.856702712 | stable | PCDHA7    |
| 0.856702712 | stable | SPANXB1   |
| 0.856736767 | stable | GLIPR1L2  |
| 0.856798568 | stable | LOC653175 |
| 0.856831588 | stable | LOC647935 |
| 0.856854641 | stable | LOC642044 |
| 0.856965722 | stable | WFDC8     |
| 0.857012295 | stable | LOC389036 |
| 0.857059427 | stable | LOC652049 |
| 0.857104521 | stable | LOC727837 |
| 0.857332057 | stable | LOC645463 |
| 0.857332057 | stable | LOC654235 |
| 0.857332057 | stable | USP44     |
| 0.857385336 | stable | CPEB4     |
| 0.857476889 | stable | C14ORF49  |
| 0.857476889 | stable | LOC642072 |

DEG.infomation

|             |        |           |
|-------------|--------|-----------|
| 0.857489843 | stable | C17ORF65  |
| 0.857584478 | stable | MGC45800  |
| 0.857630565 | stable | MGC34774  |
| 0.857746171 | stable | NOS2A     |
| 0.857746171 | stable | ABCG4     |
| 0.857746171 | stable | OR9G1     |
| 0.857746171 | stable | GREM1     |
| 0.857746171 | stable | PLA2G4E   |
| 0.857746171 | stable | LOC652630 |
| 0.857746171 | stable | ZNF643    |
| 0.857746171 | stable | ACAA2     |
| 0.8578453   | stable | C12ORF72  |
| 0.858000717 | stable | LOC652203 |
| 0.858022382 | stable | TULP3     |
| 0.858088907 | stable | GOLM1     |
| 0.858105873 | stable | C14ORF73  |
| 0.858142248 | stable | VSTM3     |
| 0.858142248 | stable | EFS       |
| 0.858233442 | stable | ELSPBP1   |
| 0.858233442 | stable | LOC51145  |
| 0.858233442 | stable | LOC653260 |
| 0.858266435 | stable | KLHDC10   |
| 0.858266435 | stable | CGB       |
| 0.858266435 | stable | HERC2P4   |
| 0.858266435 | stable | C17ORF41  |
| 0.858266435 | stable | WARS2     |
| 0.858266435 | stable | LOC642414 |
| 0.858536184 | stable | HFE       |
| 0.858536184 | stable | MLF1IP    |
| 0.858547851 | stable | LOC646918 |
| 0.858630903 | stable | LOC402198 |
| 0.858630903 | stable | LOC653337 |
| 0.858630903 | stable | PTH2R     |
| 0.858630903 | stable | LOC642530 |
| 0.858779592 | stable | HS3ST4    |
| 0.858779592 | stable | DSCC1     |
| 0.858785609 | stable | LOC650188 |
| 0.85883761  | stable | HS6ST3    |
| 0.85883761  | stable | RBM46     |
| 0.858888018 | stable | GPR139    |
| 0.859109513 | stable | HIST1H2BF |
| 0.859464493 | stable | LOC642733 |
| 0.859464493 | stable | LOC440896 |
| 0.859480505 | stable | LOC400456 |
| 0.85950145  | stable | GAGE6     |
| 0.85950145  | stable | PCDH10    |
| 0.85950145  | stable | LOC442465 |
| 0.85950145  | stable | LOC642808 |
| 0.859532552 | stable | ZNF569    |
| 0.859578191 | stable | EML1      |
| 0.859578191 | stable | KCNH4     |

DEG.infomation

|             |        |           |
|-------------|--------|-----------|
| 0.859578191 | stable | LOC387756 |
| 0.859578191 | stable | LOC642316 |
| 0.860011288 | stable | LOC646403 |
| 0.860015603 | stable | OR52W1    |
| 0.860015603 | stable | LOC644838 |
| 0.860015603 | stable | LOC647315 |
| 0.86028134  | stable | OR51M1    |
| 0.860383233 | stable | CTNNAL1   |
| 0.86043512  | stable | FLJ37307  |
| 0.860572108 | stable | LOC644695 |
| 0.860628085 | stable | LRCH2     |
| 0.860628085 | stable | LOC650713 |
| 0.860670647 | stable | HOXD10    |
| 0.860702349 | stable | LOC647360 |
| 0.860705674 | stable | LRRTM4    |
| 0.860740456 | stable | LOC652605 |
| 0.860740456 | stable | CXADR     |
| 0.860781859 | stable | IFT52     |
| 0.860784174 | stable | UBE2U     |
| 0.860865876 | stable | LOC441459 |
| 0.860887643 | stable | IGFL4     |
| 0.861031752 | stable | BGN       |
| 0.861064476 | stable | LOC390956 |
| 0.861064476 | stable | LOC643338 |
| 0.861064476 | stable | CHID1     |
| 0.861064476 | stable | C13ORF30  |
| 0.861064476 | stable | LOC731742 |
| 0.861135224 | stable | SLC6A7    |
| 0.861172982 | stable | FOXRED1   |
| 0.861172982 | stable | EFCAB4A   |
| 0.861172982 | stable | LOC651794 |
| 0.861188277 | stable | LOC644113 |
| 0.861219483 | stable | C4ORF43   |
| 0.861326587 | stable | EFNB1     |
| 0.861326587 | stable | CGREF1    |
| 0.861369686 | stable | UBE2MP1   |
| 0.861369686 | stable | LOC650879 |
| 0.86136989  | stable | LOC442582 |
| 0.86136989  | stable | TMEM82    |
| 0.861421074 | stable | LOC647451 |
| 0.861453665 | stable | FGF21     |
| 0.861476039 | stable | LOC651404 |
| 0.861531002 | stable | LOC645681 |
| 0.861531002 | stable | LOC650296 |
| 0.861531002 | stable | LOC650295 |
| 0.861593037 | stable | MGC88374  |
| 0.862016399 | stable | TMEM25    |
| 0.862034749 | stable | FLJ40235  |
| 0.862167039 | stable | JOSD3     |
| 0.862177705 | stable | LOC731396 |
| 0.862320638 | stable | MAML3     |

DEG.infomation

|             |        |           |
|-------------|--------|-----------|
| 0.862320638 | stable | FAM86B1   |
| 0.862320638 | stable | C20ORF12  |
| 0.86233171  | stable | C20ORF95  |
| 0.86233171  | stable | LOC283914 |
| 0.86233171  | stable | LOC642656 |
| 0.86233171  | stable | TLR3      |
| 0.86233171  | stable | NINJ1     |
| 0.86233171  | stable | ITGB6     |
| 0.862347198 | stable | CDSN      |
| 0.862396388 | stable | TMEM141   |
| 0.862396388 | stable | CKMT1B    |
| 0.862396388 | stable | LOC647551 |
| 0.862396388 | stable | LOC648691 |
| 0.862396388 | stable | TRIM35    |
| 0.862396388 | stable | C11ORF53  |
| 0.862396388 | stable | LOC653487 |
| 0.862396388 | stable | C19ORF52  |
| 0.862396388 | stable | LOC652102 |
| 0.862399344 | stable | DEFB108B  |
| 0.862399344 | stable | BLK       |
| 0.862416415 | stable | DSCR1L1   |
| 0.862416415 | stable | LAYN      |
| 0.862492805 | stable | C1ORF87   |
| 0.862492805 | stable | LOC642946 |
| 0.862598254 | stable | CELSR1    |
| 0.862598254 | stable | CCDC110   |
| 0.862633108 | stable | FLJ32810  |
| 0.862808173 | stable | LOC647034 |
| 0.86287438  | stable | LOC642252 |
| 0.862966414 | stable | LOC641835 |
| 0.862971354 | stable | NXF2      |
| 0.863035192 | stable | S100B     |
| 0.863151682 | stable | GJA5      |
| 0.86317324  | stable | LOC645037 |
| 0.863480718 | stable | SNX19     |
| 0.863480718 | stable | NPHS1     |
| 0.863480718 | stable | C21ORF37  |
| 0.863480718 | stable | C8ORF51   |
| 0.863510705 | stable | BTNL9     |
| 0.863567082 | stable | LOC652045 |
| 0.863567082 | stable | DAPK3     |
| 0.863582026 | stable | B4GALNT2  |
| 0.863726212 | stable | BVES      |
| 0.863726212 | stable | LOC643693 |
| 0.86380667  | stable | LOC400581 |
| 0.86380667  | stable | HTATIP    |
| 0.86380667  | stable | LOC651997 |
| 0.86380667  | stable | SYNPO2    |
| 0.863925627 | stable | LOC645450 |
| 0.863946276 | stable | DDC       |
| 0.86396352  | stable | GSDMC     |

DEG.infomation

|             |        |           |
|-------------|--------|-----------|
| 0.86396352  | stable | LOC653424 |
| 0.86396352  | stable | RASAL1    |
| 0.86396352  | stable | LOC646981 |
| 0.86396352  | stable | CCL5      |
| 0.864011383 | stable | ZNF552    |
| 0.864117654 | stable | LOC728320 |
| 0.864117654 | stable | LOC653934 |
| 0.864138371 | stable | TXNDC15   |
| 0.864155772 | stable | LOC647193 |
| 0.864155772 | stable | LOC647042 |
| 0.864155772 | stable | LOC651506 |
| 0.864157083 | stable | CNOT2     |
| 0.864178854 | stable | PNLDC1    |
| 0.864203856 | stable | SYCN      |
| 0.864264026 | stable | LOC442711 |
| 0.86430734  | stable | PCTK1     |
| 0.864321282 | stable | KCTD1     |
| 0.864348675 | stable | LOC646026 |
| 0.864348675 | stable | ANKRD38   |
| 0.864403408 | stable | C8ORF80   |
| 0.864417996 | stable | SLURP1    |
| 0.864446568 | stable | LOC647535 |
| 0.864496946 | stable | SPINLW1   |
| 0.864671868 | stable | SIRPD     |
| 0.864682811 | stable | PSMB4     |
| 0.864685252 | stable | LOC341651 |
| 0.864752816 | stable | KRTAP13-2 |
| 0.864752816 | stable | ZAK       |
| 0.864752816 | stable | LOC643206 |
| 0.864757359 | stable | STRC      |
| 0.864757359 | stable | ELOF1     |
| 0.864837485 | stable | SNX30     |
| 0.864864764 | stable | STK32C    |
| 0.864866167 | stable | LOC644048 |
| 0.864901872 | stable | LOC653589 |
| 0.864901872 | stable | OR1G1     |
| 0.864970642 | stable | LOC390874 |
| 0.86509235  | stable | LOC650799 |
| 0.86509235  | stable | LOC643615 |
| 0.86509235  | stable | C2ORF13   |
| 0.865181328 | stable | LOC647035 |
| 0.865181328 | stable | FLJ37228  |
| 0.865208652 | stable | LOC653559 |
| 0.865240118 | stable | THAP5     |
| 0.865493212 | stable | TAF9B     |
| 0.865515479 | stable | PANK4     |
| 0.865544663 | stable | ERBB4     |
| 0.865544663 | stable | C9ORF90   |
| 0.865547162 | stable | LOC442147 |
| 0.865547514 | stable | LOC646486 |
| 0.865547514 | stable | LOC400942 |



## DEG.infomation

|             |        |           |
|-------------|--------|-----------|
| 0.865547514 | stable | OR7E91P   |
| 0.865654429 | stable | LOC644207 |
| 0.865663321 | stable | LOC441007 |
| 0.865728917 | stable | LOC646360 |
| 0.86578095  | stable | GPR143    |
| 0.86578095  | stable | TRAT1     |
| 0.86578095  | stable | PRO1853   |
| 0.86580553  | stable | LOC646332 |
| 0.86580553  | stable | MINA      |
| 0.865881508 | stable | LOC650938 |
| 0.865881508 | stable | LOC643813 |
| 0.865906104 | stable | LOC641819 |
| 0.865913564 | stable | LOC650518 |
| 0.865913564 | stable | HHIP      |
| 0.865913564 | stable | LMBR1L    |
| 0.865994227 | stable | LOC652721 |
| 0.866168312 | stable | IFNA14    |
| 0.866168312 | stable | SH2D1B    |
| 0.866198975 | stable | KCTD21    |
| 0.866202904 | stable | SLED1     |
| 0.866461677 | stable | LOC652803 |
| 0.866492266 | stable | LOC730455 |
| 0.866553498 | stable | LOC553158 |
| 0.866613327 | stable | LOC641995 |
| 0.86668897  | stable | RAB2A     |
| 0.86668897  | stable | OR10G8    |
| 0.86668897  | stable | SNX8      |
| 0.866903    | stable | COL3A1    |
| 0.867049774 | stable | LOC642756 |
| 0.867086648 | stable | THRAP3    |
| 0.86722899  | stable | TREML2    |
| 0.86722899  | stable | LOC646383 |
| 0.867349147 | stable | LOC391429 |
| 0.86745546  | stable | FBXL13    |
| 0.867549023 | stable | OR51B4    |
| 0.867549023 | stable | CXORF41   |
| 0.86767703  | stable | LOC85391  |
| 0.86767703  | stable | SLC9A2    |
| 0.868028627 | stable | BIN2      |
| 0.868028627 | stable | LOC643985 |
| 0.868028627 | stable | OR8B2     |
| 0.868080002 | stable | LOC647322 |
| 0.86828692  | stable | TIMM10    |
| 0.86828692  | stable | TIGD4     |
| 0.868343505 | stable | GDF6      |
| 0.868429936 | stable | LRPAP1    |
| 0.868429936 | stable | FAM46C    |
| 0.86845851  | stable | C1ORF222  |
| 0.868628786 | stable | LOC728070 |
| 0.86864086  | stable | LOC649947 |
| 0.86864086  | stable | FGF4      |

## DEG.infomation

|             |        |               |
|-------------|--------|---------------|
| 0.868688169 | stable | GAN           |
| 0.868689303 | stable | XAGE1         |
| 0.868788807 | stable | SPDYA         |
| 0.868788807 | stable | ZNF33A        |
| 0.868810927 | stable | DAOA          |
| 0.868810927 | stable | MGC39606      |
| 0.868810927 | stable | OR6F1         |
| 0.868810927 | stable | LOC653483     |
| 0.868810927 | stable | LOC644299     |
| 0.868810927 | stable | OPRS1         |
| 0.868810927 | stable | DKFZP434E1119 |
| 0.868923279 | stable | TRPC5         |
| 0.868943646 | stable | OR52E6        |
| 0.868960364 | stable | RAB40AL       |
| 0.868973971 | stable | GRK7          |
| 0.869125928 | stable | LOC645897     |
| 0.869136831 | stable | B3GNT3        |
| 0.869136831 | stable | MAPKBP1       |
| 0.869136831 | stable | MBD3L2        |
| 0.869136831 | stable | LOC643556     |
| 0.869136831 | stable | SLC35E4       |
| 0.869166317 | stable | R3HDML        |
| 0.869193573 | stable | LOC642785     |
| 0.869294447 | stable | TRIP6         |
| 0.869294447 | stable | GRB7          |
| 0.869294447 | stable | LOC644195     |
| 0.869294447 | stable | LOC440981     |
| 0.869294447 | stable | MUPCDH        |
| 0.869329858 | stable | LOC653270     |
| 0.869429051 | stable | LOC649282     |
| 0.869434231 | stable | C10ORF96      |
| 0.869434231 | stable | P4HA3         |
| 0.869468761 | stable | LOC650611     |
| 0.869484894 | stable | LOC400652     |
| 0.86960788  | stable | LOC729967     |
| 0.869699713 | stable | LOC645932     |
| 0.86974705  | stable | OR10H5        |
| 0.86992208  | stable | RNF126P1      |
| 0.86992208  | stable | A4GNT         |
| 0.86992208  | stable | LOC401720     |
| 0.86992208  | stable | LOC647219     |
| 0.86992208  | stable | PRAMEF9       |
| 0.86999985  | stable | GFER          |
| 0.870057386 | stable | EFNA2         |
| 0.870100286 | stable | DOCK6         |
| 0.870336244 | stable | LOC649179     |
| 0.870336244 | stable | LIN28         |
| 0.870346987 | stable | ESCO2         |
| 0.870558049 | stable | GAL3ST1       |
| 0.870558049 | stable | LOC152586     |
| 0.870630441 | stable | KIAA0467      |

## DEG.infomation

|             |        |           |
|-------------|--------|-----------|
| 0.870635524 | stable | LOC647805 |
| 0.870681948 | stable | FKBP6     |
| 0.870699366 | stable | LOC647311 |
| 0.870699366 | stable | UGT3A1    |
| 0.870704703 | stable | C9ORF68   |
| 0.870772945 | stable | OR51B5    |
| 0.8707844   | stable | HSD17B1   |
| 0.8707844   | stable | MORN1     |
| 0.870883065 | stable | LOC643158 |
| 0.870883065 | stable | NALP5     |
| 0.870945968 | stable | TRAF5     |
| 0.870984552 | stable | LOC642110 |
| 0.871050983 | stable | ZNF689    |
| 0.871117916 | stable | LOC441054 |
| 0.871188038 | stable | OR6Y1     |
| 0.8712649   | stable | CA11      |
| 0.87126691  | stable | PCSK4     |
| 0.871357847 | stable | MIXL1     |
| 0.871510981 | stable | FLJ40330  |
| 0.871560419 | stable | TTY1      |
| 0.871560419 | stable | PLAC1L    |
| 0.871560419 | stable | KCNK15    |
| 0.871560419 | stable | LOC651436 |
| 0.871560419 | stable | HTRA4     |
| 0.871560419 | stable | MADD      |
| 0.871560419 | stable | LOC645093 |
| 0.871560419 | stable | LOC90379  |
| 0.871560419 | stable | DBH       |
| 0.871560419 | stable | LOC643763 |
| 0.871560419 | stable | LOC652668 |
| 0.871560419 | stable | LOC642662 |
| 0.871560419 | stable | MGC13168  |
| 0.871560419 | stable | CST11     |
| 0.871607376 | stable | ADAMTS12  |
| 0.871607376 | stable | LIPL3     |
| 0.871607376 | stable | LOC646664 |
| 0.871760996 | stable | LOC642118 |
| 0.871784115 | stable | CPLX4     |
| 0.871785842 | stable | WNT6      |
| 0.871866441 | stable | GALNTL5   |
| 0.871891224 | stable | LOC643327 |
| 0.871935235 | stable | LOC645236 |
| 0.871935235 | stable | FANCE     |
| 0.871935235 | stable | PPAP2A    |
| 0.871935235 | stable | NUCB2     |
| 0.872065617 | stable | TIPIN     |
| 0.872065617 | stable | LOC652786 |
| 0.872065617 | stable | C1ORF43   |
| 0.872065617 | stable | ZNF528    |
| 0.872098899 | stable | TPP1      |
| 0.872420315 | stable | GNB4      |

DEG.infomation

|             |        |           |
|-------------|--------|-----------|
| 0.872772637 | stable | SLC22A14  |
| 0.872772637 | stable | LOC642566 |
| 0.872772637 | stable | GALNT5    |
| 0.872780613 | stable | CREG2     |
| 0.873020976 | stable | LOC649864 |
| 0.873040399 | stable | LOC649136 |
| 0.873055072 | stable | LOC402634 |
| 0.873055072 | stable | PINK1     |
| 0.873055072 | stable | IRGQ      |
| 0.873193237 | stable | GLB1L2    |
| 0.873307432 | stable | LOC643038 |
| 0.873309569 | stable | USP45     |
| 0.873313862 | stable | DNAH7     |
| 0.873353049 | stable | CDON      |
| 0.873353049 | stable | LOC389832 |
| 0.873388082 | stable | LOC642345 |
| 0.873466839 | stable | OR8B12    |
| 0.873526444 | stable | OR1D4     |
| 0.873526444 | stable | C15ORF26  |
| 0.873526444 | stable | GC        |
| 0.873526444 | stable | LOC645416 |
| 0.873526444 | stable | LOC652190 |
| 0.873526444 | stable | RPS11     |
| 0.873532164 | stable | KIAA0748  |
| 0.873549076 | stable | C1ORF157  |
| 0.873732542 | stable | FLJ45966  |
| 0.873737345 | stable | ADAM3A    |
| 0.873794345 | stable | LOC650076 |
| 0.873794345 | stable | LOC642595 |
| 0.873794345 | stable | LOC644883 |
| 0.873856545 | stable | LOC51152  |
| 0.873954951 | stable | TAS2R50   |
| 0.874026612 | stable | RSPO1     |
| 0.874085523 | stable | PLA2G12A  |
| 0.874147898 | stable | LOC647025 |
| 0.874147898 | stable | EIF5AL1   |
| 0.874249512 | stable | USP34     |
| 0.874267109 | stable | HOXD13    |
| 0.874303287 | stable | LOC651695 |
| 0.874383163 | stable | LOC649977 |
| 0.874461382 | stable | LRRN1     |
| 0.874461382 | stable | LOC651311 |
| 0.874461382 | stable | LOC652141 |
| 0.874474156 | stable | LOC646372 |
| 0.874474156 | stable | ZSCAN10   |
| 0.874501549 | stable | LOC440508 |
| 0.874501549 | stable | SLC22A7   |
| 0.874624022 | stable | FRS2      |
| 0.874624022 | stable | LOC642804 |
| 0.874624022 | stable | CD22      |
| 0.874624022 | stable | ZNF329    |

DEG.infomation

|             |        |           |
|-------------|--------|-----------|
| 0.874624022 | stable | COBLL1    |
| 0.874624022 | stable | ATG16L1   |
| 0.87473336  | stable | SNORD42A  |
| 0.87473336  | stable | LOC727934 |
| 0.87473336  | stable | LYPD3     |
| 0.874772311 | stable | LOC440338 |
| 0.874810578 | stable | HOXA6     |
| 0.874810578 | stable | FLJ38973  |
| 0.874810578 | stable | LOC648302 |
| 0.874810578 | stable | SLC12A4   |
| 0.874854804 | stable | LOC643647 |
| 0.874854804 | stable | PTK7      |
| 0.874947002 | stable | CAPZA2    |
| 0.874947002 | stable | CC2D1A    |
| 0.874953784 | stable | GLYCAM1   |
| 0.875000091 | stable | SLC35B2   |
| 0.875026017 | stable | LOC285484 |
| 0.875026017 | stable | LOC652113 |
| 0.875026017 | stable | CD177     |
| 0.875027283 | stable | MGC71805  |
| 0.875091112 | stable | SPATA21   |
| 0.875091112 | stable | LOC440386 |
| 0.87527977  | stable | LOC647297 |
| 0.875339958 | stable | C14ORF144 |
| 0.875355868 | stable | SIX6      |
| 0.875373346 | stable | OGFOD1    |
| 0.875445042 | stable | LOC646584 |
| 0.875687554 | stable | OR8S1     |
| 0.875687554 | stable | PRAMEF8   |
| 0.875687554 | stable | C6ORF123  |
| 0.875687554 | stable | IGF2BP1   |
| 0.876034203 | stable | FAM69A    |
| 0.876034203 | stable | TINAG     |
| 0.876034203 | stable | P2RX1     |
| 0.876034203 | stable | FRMPD2    |
| 0.876176454 | stable | SSTR3     |
| 0.876186595 | stable | FOXF2     |
| 0.876195397 | stable | LPA       |
| 0.876198301 | stable | LOC731884 |
| 0.87626409  | stable | LOC642228 |
| 0.87626409  | stable | LOC646617 |
| 0.876286281 | stable | SF3B2     |
| 0.876286281 | stable | PPAPDC1A  |
| 0.876357913 | stable | LOC645006 |
| 0.876388186 | stable | LOC402282 |
| 0.876388186 | stable | KIAA0754  |
| 0.876510219 | stable | NOX3      |
| 0.876562237 | stable | PYGM      |
| 0.876619869 | stable | MRPS18B   |
| 0.876619869 | stable | ABCA8     |
| 0.876653861 | stable | LOC729085 |

## DEG.infomation

|             |        |           |
|-------------|--------|-----------|
| 0.876747017 | stable | REM2      |
| 0.876747017 | stable | MYT1      |
| 0.876964349 | stable | LOC652848 |
| 0.8769879   | stable | LOC644952 |
| 0.8769879   | stable | LOC648089 |
| 0.876994431 | stable | MTMR7     |
| 0.876994431 | stable | LOC647987 |
| 0.876995299 | stable | ATP2A1    |
| 0.877123721 | stable | LOC134121 |
| 0.877151249 | stable | LOC731017 |
| 0.877151249 | stable | LOC441782 |
| 0.877151249 | stable | LOC648609 |
| 0.877151249 | stable | RNPC2     |
| 0.877179078 | stable | LOC646079 |
| 0.877179078 | stable | SYT1      |
| 0.877311298 | stable | OSBPL5    |
| 0.877395448 | stable | TR2IT1    |
| 0.877495746 | stable | INTS6     |
| 0.877495746 | stable | LOC653053 |
| 0.877495746 | stable | LOC651898 |
| 0.877568589 | stable | C21ORF84  |
| 0.877574309 | stable | BCL2L13   |
| 0.877611191 | stable | ENPP1     |
| 0.877611191 | stable | LOC283867 |
| 0.877611191 | stable | STRA8     |
| 0.877611191 | stable | KRTAP6-1  |
| 0.877640796 | stable | OR2T10    |
| 0.877640796 | stable | LOC339760 |
| 0.877888989 | stable | RPS4Y1    |
| 0.877888989 | stable | CLEC11A   |
| 0.877888989 | stable | GTF2H2    |
| 0.877888989 | stable | OR4C45    |
| 0.877934987 | stable | LOC642536 |
| 0.877934987 | stable | OR1J1     |
| 0.877934987 | stable | ALS2CR11  |
| 0.878029255 | stable | LOC651951 |
| 0.87804697  | stable | C10ORF68  |
| 0.878106638 | stable | LOC340515 |
| 0.878221468 | stable | LOC644396 |
| 0.878221468 | stable | LOC338756 |
| 0.878291218 | stable | AREG      |
| 0.878291218 | stable | CD200R1   |
| 0.878336862 | stable | GIMAP1    |
| 0.878508502 | stable | LOC646160 |
| 0.878508502 | stable | SPTBN2    |
| 0.878508502 | stable | EFCAB1    |
| 0.878508502 | stable | LOC643717 |
| 0.878508502 | stable | LOC644479 |
| 0.878568543 | stable | GABRR3    |
| 0.878593174 | stable | LOC646590 |
| 0.878604116 | stable | LOC652009 |

DEG.infomation

|             |        |            |
|-------------|--------|------------|
| 0.878663834 | stable | GPS1       |
| 0.878665417 | stable | PCDH21     |
| 0.87867247  | stable | KIF6       |
| 0.878695333 | stable | CTXN1      |
| 0.878695333 | stable | LOC731714  |
| 0.878711698 | stable | LOC642062  |
| 0.878711698 | stable | LOC731682  |
| 0.879008517 | stable | LOC647585  |
| 0.879046241 | stable | STARD6     |
| 0.879046241 | stable | CLDN19     |
| 0.879046241 | stable | ANKRD19    |
| 0.879046241 | stable | RNU12      |
| 0.879153258 | stable | KIAA1586   |
| 0.879179371 | stable | SSBP1      |
| 0.879179371 | stable | MUM1       |
| 0.879216311 | stable | ZNF292     |
| 0.879270309 | stable | POTE14     |
| 0.879270309 | stable | OR51D1     |
| 0.879270309 | stable | LOC402679  |
| 0.879340983 | stable | IL1F5      |
| 0.879345856 | stable | IL12RB2    |
| 0.879345856 | stable | LOC643825  |
| 0.879345856 | stable | MGC48628   |
| 0.879345856 | stable | OPN4       |
| 0.879345856 | stable | LOC646550  |
| 0.879345856 | stable | CSGALNACT1 |
| 0.879345856 | stable | OR8B8      |
| 0.87936575  | stable | C21ORF125  |
| 0.87936575  | stable | SELV       |
| 0.87936575  | stable | RG9MTD2    |
| 0.87936575  | stable | LOC388743  |
| 0.87936575  | stable | LOC641820  |
| 0.879539658 | stable | FLJ32310   |
| 0.879539658 | stable | SERPINA2   |
| 0.879539658 | stable | LOC643040  |
| 0.879539658 | stable | CD1D       |
| 0.879539658 | stable | WASF1      |
| 0.879565595 | stable | MRPS18A    |
| 0.879565595 | stable | LOC441920  |
| 0.879619821 | stable | NLRP6      |
| 0.879619821 | stable | GRIP1      |
| 0.879619821 | stable | LOC642263  |
| 0.879726256 | stable | C8ORFK29   |
| 0.879766097 | stable | LOC387686  |
| 0.87977924  | stable | CDCA3      |
| 0.879924271 | stable | NBPF1      |
| 0.879924271 | stable | LOC126147  |
| 0.879924271 | stable | LOC732343  |
| 0.879943754 | stable | CD96       |
| 0.879943953 | stable | H2AFV      |
| 0.879943953 | stable | C12ORF28   |

DEG.infomation

|             |        |           |
|-------------|--------|-----------|
| 0.879943953 | stable | LOC642570 |
| 0.879953102 | stable | LOC642561 |
| 0.879953102 | stable | SPRR2G    |
| 0.880152794 | stable | CACNG2    |
| 0.880152794 | stable | ANGPTL6   |
| 0.880245559 | stable | FKBP10    |
| 0.880297544 | stable | IL1RAPL1  |
| 0.880333745 | stable | DEFB103A  |
| 0.880450708 | stable | LOC732381 |
| 0.880450708 | stable | FCN2      |
| 0.880461528 | stable | LOC647965 |
| 0.880461528 | stable | NUP98     |
| 0.880463358 | stable | DLG7      |
| 0.880489203 | stable | LOC439936 |
| 0.880559958 | stable | GPX7      |
| 0.880620676 | stable | WNT4      |
| 0.880625444 | stable | MGC26647  |
| 0.880625444 | stable | UFM1      |
| 0.880723493 | stable | WDR6      |
| 0.880723493 | stable | CIITA     |
| 0.880723493 | stable | LOC729249 |
| 0.880742485 | stable | LOC646895 |
| 0.880775845 | stable | FLJ25169  |
| 0.880826448 | stable | LOC649293 |
| 0.880881267 | stable | TSPAN10   |
| 0.880941384 | stable | USO1      |
| 0.880994741 | stable | RAB19     |
| 0.881105189 | stable | CSNK1A1L  |
| 0.881165205 | stable | MSL3L2    |
| 0.881214061 | stable | CSF2RB    |
| 0.881260646 | stable | PHB2      |
| 0.881298259 | stable | ELAVL2    |
| 0.881298259 | stable | OR2T3     |
| 0.88135628  | stable | LOC285636 |
| 0.88135628  | stable | LOC653882 |
| 0.881438998 | stable | LOC642018 |
| 0.881438998 | stable | TRAF3     |
| 0.881438998 | stable | C6ORF25   |
| 0.881468325 | stable | TRIM14    |
| 0.881512546 | stable | HOXB8     |
| 0.881532872 | stable | CARS2     |
| 0.881591345 | stable | C12ORF42  |
| 0.881658999 | stable | LOC641931 |
| 0.881661236 | stable | OR8B4     |
| 0.881936293 | stable | LOC158345 |
| 0.881936293 | stable | ATCAY     |
| 0.881936293 | stable | LOC391241 |
| 0.882030828 | stable | C10ORF120 |
| 0.882069784 | stable | LOC643771 |
| 0.882235919 | stable | HIST1H2BB |
| 0.882235919 | stable | PAX7      |



DEG.infomation

|             |        |           |
|-------------|--------|-----------|
| 0.882516504 | stable | SPRED3    |
| 0.882605465 | stable | PSMD1     |
| 0.882638304 | stable | LOC652460 |
| 0.882638304 | stable | SIAE      |
| 0.882779487 | stable | GALR3     |
| 0.882818716 | stable | LOC651919 |
| 0.882866579 | stable | LOC644019 |
| 0.882866579 | stable | LOC732138 |
| 0.882866579 | stable | USP20     |
| 0.882866579 | stable | CLDN6     |
| 0.882921221 | stable | C16ORF69  |
| 0.882983692 | stable | LOC647645 |
| 0.883049523 | stable | LOC650830 |
| 0.883177649 | stable | LOC388559 |
| 0.883187002 | stable | CEBPZ     |
| 0.883201211 | stable | EMP2      |
| 0.883211471 | stable | MTF2      |
| 0.883211471 | stable | RHOH      |
| 0.883282418 | stable | DNAJB4    |
| 0.883332212 | stable | LOC644136 |
| 0.883332212 | stable | PCDHB9    |
| 0.883332212 | stable | APOBEC3B  |
| 0.88341966  | stable | CCDC85B   |
| 0.883502973 | stable | C1ORF75   |
| 0.883522869 | stable | TMEM76    |
| 0.883522869 | stable | DAO       |
| 0.883522869 | stable | BTC       |
| 0.883522869 | stable | LOC653701 |
| 0.883738687 | stable | LOC652589 |
| 0.883843432 | stable | POU2F1    |
| 0.883843432 | stable | GAGE4     |
| 0.883881435 | stable | CRYBB3    |
| 0.883944159 | stable | LOC643116 |
| 0.883969959 | stable | PRKDC     |
| 0.883969959 | stable | IL31      |
| 0.884191922 | stable | LOC653512 |
| 0.884191922 | stable | RNF187    |
| 0.884191922 | stable | HOMER2    |
| 0.884191922 | stable | LOC653971 |
| 0.884191922 | stable | KIF4A     |
| 0.884191922 | stable | LOC650776 |
| 0.884191922 | stable | LOC650881 |
| 0.884225097 | stable | ROPN1B    |
| 0.884225097 | stable | PTCHD2    |
| 0.884225097 | stable | ELOVL3    |
| 0.884225097 | stable | KIF3A     |
| 0.884225097 | stable | VGLL1     |
| 0.884225097 | stable | SETD5     |
| 0.884225097 | stable | LOC649963 |
| 0.884225097 | stable | CDH4      |
| 0.884380342 | stable | LOC649804 |

## DEG.infomation

|             |        |           |
|-------------|--------|-----------|
| 0.884408408 | stable | LOC149351 |
| 0.884478517 | stable | ACCN4     |
| 0.884478517 | stable | FLJ13614  |
| 0.884653324 | stable | NRXN3     |
| 0.884653324 | stable | GLI2      |
| 0.884653324 | stable | CIB4      |
| 0.884653324 | stable | LOC649905 |
| 0.884653324 | stable | ARHGAP15  |
| 0.884658082 | stable | LOC202134 |
| 0.884661027 | stable | LOC646778 |
| 0.88467798  | stable | SERPINA12 |
| 0.884739355 | stable | CRLS1     |
| 0.884739355 | stable | BCL11B    |
| 0.884802392 | stable | LOC642207 |
| 0.885115691 | stable | LOC644683 |
| 0.885115691 | stable | SILV      |
| 0.885179108 | stable | MFAP5     |
| 0.885245325 | stable | FAF1      |
| 0.885253872 | stable | TBX10     |
| 0.885275629 | stable | FSCN2     |
| 0.885311808 | stable | RNF139    |
| 0.885364505 | stable | ANKRD5    |
| 0.885364505 | stable | LOC653729 |
| 0.885364505 | stable | ABP1      |
| 0.885364505 | stable | USH3A     |
| 0.885364505 | stable | NCK1      |
| 0.885364505 | stable | LSM11     |
| 0.885364505 | stable | MAGEA5    |
| 0.885364505 | stable | SNAP25    |
| 0.885364505 | stable | ANLN      |
| 0.885364505 | stable | HIST1H3I  |
| 0.885498802 | stable | FLJ27255  |
| 0.885564956 | stable | ZNF618    |
| 0.885644947 | stable | IL26      |
| 0.885693762 | stable | MC2R      |
| 0.885693762 | stable | LOC653606 |
| 0.885693762 | stable | FLJ44790  |
| 0.885693762 | stable | CLEC4D    |
| 0.885704547 | stable | KEL       |
| 0.885761573 | stable | LOC392221 |
| 0.885806782 | stable | OR14C36   |
| 0.885894289 | stable | KIAA0284  |
| 0.885903562 | stable | CSTF2     |
| 0.885903562 | stable | LOC652298 |
| 0.885903562 | stable | C6ORF66   |
| 0.885903562 | stable | RAB39     |
| 0.886072263 | stable | EMR4      |
| 0.886072263 | stable | CATSPER4  |
| 0.886072263 | stable | LOC646373 |
| 0.886072263 | stable | OR5P2     |
| 0.886080622 | stable | LOC649495 |

DEG.infomation

|             |        |           |
|-------------|--------|-----------|
| 0.88618571  | stable | OR52N4    |
| 0.88618571  | stable | KRTAP2-1  |
| 0.88618571  | stable | FAM55C    |
| 0.88618571  | stable | LOC643801 |
| 0.88618571  | stable | TMEM99    |
| 0.886262163 | stable | PCDHGB1   |
| 0.886262163 | stable | NDUFB11   |
| 0.886262163 | stable | LOC150759 |
| 0.886276398 | stable | C9ORF82   |
| 0.886328926 | stable | IL21      |
| 0.886422849 | stable | MMP8      |
| 0.886471368 | stable | LOC650781 |
| 0.886579784 | stable | LOC644024 |
| 0.886579784 | stable | LOC652044 |
| 0.886579784 | stable | LOC647650 |
| 0.886579784 | stable | PXK       |
| 0.886588663 | stable | HIST2H3C  |
| 0.886751108 | stable | REN       |
| 0.886826428 | stable | LOC646632 |
| 0.886898607 | stable | LOC645373 |
| 0.886926274 | stable | LOC646003 |
| 0.886948439 | stable | FBP2      |
| 0.886953563 | stable | FLJ11795  |
| 0.886953563 | stable | 7A5       |
| 0.886953563 | stable | KRT71     |
| 0.886953563 | stable | LOC650757 |
| 0.886953563 | stable | LOC642460 |
| 0.88705018  | stable | MMP21     |
| 0.887060934 | stable | KIAA1239  |
| 0.887148963 | stable | LOC648453 |
| 0.887165347 | stable | MFSD4     |
| 0.887176998 | stable | CNO       |
| 0.887176998 | stable | LOC644819 |
| 0.887176998 | stable | ZNF497    |
| 0.887176998 | stable | ARR3      |
| 0.887176998 | stable | LOC728454 |
| 0.887176998 | stable | KIR2DL5A  |
| 0.887176998 | stable | EEPD1     |
| 0.887222169 | stable | TCEB3B    |
| 0.887265316 | stable | RG9MTD1   |
| 0.887277283 | stable | SLC15A2   |
| 0.887277283 | stable | CYORF16   |
| 0.887319294 | stable | FAM132A   |
| 0.887623629 | stable | LGSN      |
| 0.887677629 | stable | C1ORF158  |
| 0.887677629 | stable | CCT6A     |
| 0.887982792 | stable | FRYL      |
| 0.888127168 | stable | GSX1      |
| 0.888127168 | stable | LOC646055 |
| 0.888127168 | stable | LOC644111 |
| 0.888159794 | stable | LOC401677 |

## DEG.infomation

|             |        |           |
|-------------|--------|-----------|
| 0.888169889 | stable | LOC152024 |
| 0.888179457 | stable | CDCA7     |
| 0.888179457 | stable | SDCCAG3L  |
| 0.888249395 | stable | COL28     |
| 0.888377233 | stable | SLC26A8   |
| 0.888447379 | stable | FOXK1     |
| 0.888466557 | stable | SLC35C2   |
| 0.888511598 | stable | LOC649242 |
| 0.888545566 | stable | LOC647008 |
| 0.888625055 | stable | LOC651040 |
| 0.888680132 | stable | SLC25A33  |
| 0.888680132 | stable | RFX4      |
| 0.888680132 | stable | MAPK8     |
| 0.88868226  | stable | MYLK3     |
| 0.88868226  | stable | CNOT1     |
| 0.88868226  | stable | DPY19L2P4 |
| 0.88868226  | stable | PTS       |
| 0.88868226  | stable | C20ORF191 |
| 0.88868226  | stable | LOC647713 |
| 0.889187589 | stable | TRIM73    |
| 0.889187589 | stable | MPV17L    |
| 0.889187589 | stable | OR8G2     |
| 0.889187589 | stable | XAGE3     |
| 0.889187589 | stable | PDCD6     |
| 0.889359613 | stable | PCDH11X   |
| 0.889359613 | stable | FLJ39080  |
| 0.889359613 | stable | LOC651624 |
| 0.889359613 | stable | SH2D3A    |
| 0.889406264 | stable | RPS27A    |
| 0.889406264 | stable | SPATA4    |
| 0.889406264 | stable | EPB41L2   |
| 0.889406264 | stable | FAM90A11P |
| 0.889406264 | stable | OPTC      |
| 0.889406264 | stable | CNDP1     |
| 0.889406264 | stable | GCN1L1    |
| 0.889406264 | stable | TMSL8     |
| 0.88944328  | stable | GPR173    |
| 0.88962566  | stable | LOC648103 |
| 0.889914974 | stable | GPR150    |
| 0.889989674 | stable | LOC644976 |
| 0.890091964 | stable | LOC648879 |
| 0.890171508 | stable | DNAH17    |
| 0.890171508 | stable | C17ORF50  |
| 0.89021089  | stable | LRRRC46   |
| 0.890252059 | stable | B3GNT7    |
| 0.890252059 | stable | LOC647435 |
| 0.89034094  | stable | KCNK5     |
| 0.89034094  | stable | DALRD3    |
| 0.89034094  | stable | BLOC1S2   |
| 0.89034094  | stable | LOC645757 |
| 0.89034094  | stable | LOC649984 |

DEG.infomation

|             |        |            |
|-------------|--------|------------|
| 0.89034094  | stable | LOC374768  |
| 0.89034094  | stable | C12ORF8    |
| 0.89034094  | stable | LOC286528  |
| 0.89034094  | stable | LOC646357  |
| 0.89035773  | stable | ST6GALNAC5 |
| 0.89035773  | stable | LOC652880  |
| 0.89035773  | stable | LOC653891  |
| 0.89035773  | stable | C4ORF31    |
| 0.89035773  | stable | LOC653499  |
| 0.89035773  | stable | LOC283767  |
| 0.89035773  | stable | C14ORF50   |
| 0.89035773  | stable | TAAR6      |
| 0.89035773  | stable | LOC390683  |
| 0.890447184 | stable | LOC283412  |
| 0.890465646 | stable | ARL11      |
| 0.890569977 | stable | LOC728929  |
| 0.890651134 | stable | LOC641905  |
| 0.890651134 | stable | LILRP2     |
| 0.890651134 | stable | LOC649355  |
| 0.890721573 | stable | C2ORF73    |
| 0.890988006 | stable | LOC649902  |
| 0.890988006 | stable | PSG3       |
| 0.890988006 | stable | TTLL13     |
| 0.890988006 | stable | LOC402100  |
| 0.890988006 | stable | PLAC1      |
| 0.890988006 | stable | LYPD6      |
| 0.890988006 | stable | SERPINC1   |
| 0.891064313 | stable | RPP30      |
| 0.891064313 | stable | MAP2K6     |
| 0.891064313 | stable | C9ORF152   |
| 0.891146782 | stable | RNF2       |
| 0.891196265 | stable | CBWD2      |
| 0.891215331 | stable | LOC653114  |
| 0.89131052  | stable | TOP1P2     |
| 0.891348205 | stable | LPO        |
| 0.8913617   | stable | LOC644072  |
| 0.89147003  | stable | LOC646861  |
| 0.891470403 | stable | C1ORF61    |
| 0.891677301 | stable | H2AFB2     |
| 0.891677301 | stable | KIAA1345   |
| 0.891729632 | stable | LOC645225  |
| 0.891843314 | stable | SLC38A6    |
| 0.891843314 | stable | C3ORF72    |
| 0.891843314 | stable | LOC645434  |
| 0.891843314 | stable | TNPO3      |
| 0.891905113 | stable | IL17A      |
| 0.891905113 | stable | LOC654053  |
| 0.891915514 | stable | RER1       |
| 0.892256733 | stable | LOC338588  |
| 0.892256733 | stable | LOC644228  |
| 0.892305454 | stable | LOC653163  |

## DEG.infomation

|             |        |           |
|-------------|--------|-----------|
| 0.892354243 | stable | DERL3     |
| 0.892383852 | stable | LOC652327 |
| 0.892383852 | stable | LOC643933 |
| 0.892627101 | stable | LOC647649 |
| 0.892641619 | stable | LOC651463 |
| 0.892643681 | stable | TMEM196   |
| 0.892719436 | stable | STK11IP   |
| 0.892719436 | stable | LOC642773 |
| 0.892730213 | stable | LOC646257 |
| 0.892730213 | stable | LOC653198 |
| 0.892730213 | stable | GRP       |
| 0.892730213 | stable | LOC441239 |
| 0.892730213 | stable | PPME1     |
| 0.892839003 | stable | LOC646529 |
| 0.892965055 | stable | SNX9      |
| 0.893012078 | stable | SLC32A1   |
| 0.893050173 | stable | CSAG1     |
| 0.893062078 | stable | IREB2     |
| 0.893093713 | stable | CHCHD1    |
| 0.893097936 | stable | RDHE2     |
| 0.893097936 | stable | LOC647908 |
| 0.893114455 | stable | C17ORF47  |
| 0.893199167 | stable | RIMS2     |
| 0.893199167 | stable | LOC391269 |
| 0.893199167 | stable | ADAMTS20  |
| 0.893199167 | stable | LOC441958 |
| 0.893199167 | stable | FOXA1     |
| 0.893407101 | stable | LOC646445 |
| 0.89345875  | stable | ALDH3B2   |
| 0.89345875  | stable | LOC648934 |
| 0.89345875  | stable | CRIPAK    |
| 0.89345875  | stable | LOC646764 |
| 0.893459051 | stable | TLE1      |
| 0.893491925 | stable | LOC643884 |
| 0.893515325 | stable | GUCY1B2   |
| 0.893596727 | stable | EIF1      |
| 0.893596727 | stable | FIBP      |
| 0.893596727 | stable | PRO0611   |
| 0.893596727 | stable | LOC646473 |
| 0.893596727 | stable | TOP2A     |
| 0.893596727 | stable | CXYORF2   |
| 0.893596727 | stable | LOC642685 |
| 0.893596727 | stable | PCDH15    |
| 0.893596727 | stable | ACVR2B    |
| 0.893890263 | stable | MAST2     |
| 0.893890263 | stable | SYNGR3    |
| 0.893958002 | stable | ERCC6L    |
| 0.893958002 | stable | CPB1      |
| 0.893958002 | stable | FLJ44379  |
| 0.893958002 | stable | LOXL2     |
| 0.893958002 | stable | FAM26D    |

## DEG.infomation

|             |        |           |
|-------------|--------|-----------|
| 0.893958002 | stable | LOC402509 |
| 0.893958002 | stable | LOC441052 |
| 0.893961675 | stable | USP6      |
| 0.893961675 | stable | PDXDC2    |
| 0.893961675 | stable | SEPT12    |
| 0.893961675 | stable | C20ORF186 |
| 0.893961675 | stable | LOC645527 |
| 0.893961675 | stable | LOC729317 |
| 0.894038897 | stable | LOC651113 |
| 0.894038897 | stable | ACAN      |
| 0.894038897 | stable | TROAP     |
| 0.894047926 | stable | LOC648473 |
| 0.894232312 | stable | ACSBG2    |
| 0.894232312 | stable | ZIM2      |
| 0.894232312 | stable | LOC649557 |
| 0.894232312 | stable | CTAGE6    |
| 0.894311067 | stable | LOC644954 |
| 0.894498509 | stable | LOC440518 |
| 0.894528886 | stable | LOC651308 |
| 0.894531156 | stable | PPFIBP2   |
| 0.894684742 | stable | C1ORF14   |
| 0.894689646 | stable | SERPIND1  |
| 0.89471092  | stable | EID2      |
| 0.894791251 | stable | MLN       |
| 0.895117706 | stable | LOC651051 |
| 0.895117706 | stable | LCTL      |
| 0.895117706 | stable | NHEDC1    |
| 0.895117706 | stable | CECR7     |
| 0.895117706 | stable | FAM83F    |
| 0.895117706 | stable | C15ORF2   |
| 0.895126836 | stable | CD27      |
| 0.895157769 | stable | ZNF335    |
| 0.895157769 | stable | DDX12     |
| 0.895157769 | stable | LOC284861 |
| 0.895162076 | stable | BTBD10    |
| 0.895162076 | stable | NDUFV2    |
| 0.895190935 | stable | LAPTM4A   |
| 0.895190935 | stable | BMP8B     |
| 0.895190935 | stable | LOC254028 |
| 0.895267323 | stable | C19ORF16  |
| 0.895267323 | stable | WNT7B     |
| 0.895267323 | stable | LOC641798 |
| 0.895438663 | stable | DLEU7     |
| 0.895629424 | stable | ONECUT1   |
| 0.895629424 | stable | ETHE1     |
| 0.8957175   | stable | TAS1R3    |
| 0.895730078 | stable | MED31     |
| 0.895933535 | stable | LOC652846 |
| 0.895933535 | stable | JAKMIP1   |
| 0.895933535 | stable | LOC440491 |
| 0.895945453 | stable | IFNA1     |

## DEG.infomation

|             |        |           |
|-------------|--------|-----------|
| 0.895946422 | stable | FAM78A    |
| 0.895946422 | stable | MGC51338  |
| 0.895946422 | stable | DYNC1I2   |
| 0.895946422 | stable | LOC650924 |
| 0.895983255 | stable | ADAMTS14  |
| 0.8959978   | stable | C9ORF84   |
| 0.896127286 | stable | MGC26733  |
| 0.896255666 | stable | LOC90342  |
| 0.896255666 | stable | ZNF468    |
| 0.896255666 | stable | LRFN2     |
| 0.896310937 | stable | NDUFB10   |
| 0.896388868 | stable | METTTL11A |
| 0.896402011 | stable | OR4F6     |
| 0.896402011 | stable | LOC644023 |
| 0.896407559 | stable | UPP2      |
| 0.896407559 | stable | NLGN4Y    |
| 0.89682186  | stable | LOC126075 |
| 0.896876025 | stable | C9ORF139  |
| 0.896876025 | stable | LOC643982 |
| 0.896920949 | stable | LOC387939 |
| 0.896931129 | stable | LRRTM2    |
| 0.896931129 | stable | LOC645947 |
| 0.896938548 | stable | LOC139363 |
| 0.896966999 | stable | ETV3      |
| 0.896966999 | stable | OTX1      |
| 0.896966999 | stable | TPTE      |
| 0.89705435  | stable | IFNG      |
| 0.89705435  | stable | OR5A2     |
| 0.897143964 | stable | SFRS12IP1 |
| 0.897181066 | stable | ENY2      |
| 0.897181066 | stable | KIAA1462  |
| 0.897249249 | stable | KLF14     |
| 0.897265148 | stable | KTN1      |
| 0.897265148 | stable | LOC651361 |
| 0.897265148 | stable | TACR3     |
| 0.897265148 | stable | FLJ44216  |
| 0.897280689 | stable | C14ORF105 |
| 0.897315871 | stable | POMC      |
| 0.897315871 | stable | SLC2A2    |
| 0.897315871 | stable | C20ORF151 |
| 0.897315871 | stable | LOC652260 |
| 0.897433078 | stable | LOC649023 |
| 0.897698255 | stable | LOC651465 |
| 0.897698255 | stable | C3ORF67   |
| 0.897711094 | stable | LOC651732 |
| 0.897754641 | stable | GJD2      |
| 0.897754641 | stable | LOC649407 |
| 0.897754641 | stable | ANGEL1    |
| 0.897754641 | stable | LOC651808 |
| 0.897754641 | stable | LOC645476 |
| 0.897754641 | stable | RPLP1     |



## DEG.infomation

|             |        |           |
|-------------|--------|-----------|
| 0.897754641 | stable | GCM1      |
| 0.897754641 | stable | LOC653366 |
| 0.897754641 | stable | LOC203235 |
| 0.897827192 | stable | GRIN3B    |
| 0.897827192 | stable | INPP5E    |
| 0.898138742 | stable | HIGD1A    |
| 0.898138742 | stable | KIAA1147  |
| 0.898138742 | stable | LOC649191 |
| 0.898253632 | stable | LOC648830 |
| 0.898253632 | stable | ALG6      |
| 0.898471738 | stable | CALML5    |
| 0.898555241 | stable | MZF1      |
| 0.898596539 | stable | LOC646714 |
| 0.898648135 | stable | FBXL16    |
| 0.898648135 | stable | BTF3      |
| 0.898648135 | stable | LOC650534 |
| 0.898665335 | stable | GOLGA6    |
| 0.898665335 | stable | BTBD14B   |
| 0.898665335 | stable | LOC728799 |
| 0.898665335 | stable | LOC650634 |
| 0.898665335 | stable | LOC389958 |
| 0.898724862 | stable | FAM83G    |
| 0.898746863 | stable | LOC51233  |
| 0.898746863 | stable | LOC646456 |
| 0.898775765 | stable | CYSLTR2   |
| 0.898800248 | stable | C9ORF79   |
| 0.898800248 | stable | LOC642930 |
| 0.898800248 | stable | LOC387693 |
| 0.898800248 | stable | KCNQ1DN   |
| 0.898800248 | stable | SYCP2L    |
| 0.898820738 | stable | LOC401220 |
| 0.898820738 | stable | MGLL      |
| 0.898841023 | stable | LOC652760 |
| 0.898842722 | stable | SLC22A25  |
| 0.898842722 | stable | SIGLEC8   |
| 0.898941491 | stable | ZNF169    |
| 0.899123369 | stable | RBM19     |
| 0.899240921 | stable | LOC646094 |
| 0.899259546 | stable | LOC653493 |
| 0.899259546 | stable | SERPINI2  |
| 0.899268325 | stable | MGC22014  |
| 0.899373777 | stable | TBC1D25   |
| 0.899373777 | stable | NRP2      |
| 0.899373777 | stable | CCDC75    |
| 0.899381655 | stable | SF3B5     |
| 0.899564759 | stable | FLJ25439  |
| 0.899674248 | stable | HMMR      |
| 0.899674248 | stable | LOC653543 |
| 0.899730292 | stable | LOC648264 |
| 0.899730292 | stable | ARSA      |
| 0.899734013 | stable | ARHGAP5   |

## DEG.infomation

|             |        |               |
|-------------|--------|---------------|
| 0.899891564 | stable | LOC652736     |
| 0.900117524 | stable | POU6F2        |
| 0.90019676  | stable | C1ORF187      |
| 0.90019676  | stable | GPRASP1       |
| 0.90019676  | stable | PRTN3         |
| 0.90019676  | stable | FLJ35282      |
| 0.90019676  | stable | RHPN1         |
| 0.90019676  | stable | ARL4C         |
| 0.90019676  | stable | LOC441347     |
| 0.90019676  | stable | HBE1          |
| 0.90019676  | stable | OR2G3         |
| 0.90019676  | stable | PARP8         |
| 0.90019676  | stable | RTN4          |
| 0.90019676  | stable | IFNA4         |
| 0.900285909 | stable | KRT77         |
| 0.90031501  | stable | LOC652233     |
| 0.900438878 | stable | FLJ33534      |
| 0.900438878 | stable | ADAMTS15      |
| 0.900438878 | stable | CUTL1         |
| 0.900438878 | stable | ORM2          |
| 0.900438878 | stable | GPR27         |
| 0.900438878 | stable | C19ORF63      |
| 0.900438878 | stable | LOC652644     |
| 0.900588654 | stable | RPL7A         |
| 0.900588654 | stable | FLJ45803      |
| 0.900588654 | stable | PLA2G4B       |
| 0.900604672 | stable | FAM55A        |
| 0.900747356 | stable | KCNA2         |
| 0.900747356 | stable | C10ORF92      |
| 0.900755972 | stable | OR2A12        |
| 0.900801138 | stable | DKFZP434J1015 |
| 0.901167413 | stable | LOC441120     |
| 0.901203564 | stable | LOC652322     |
| 0.901254323 | stable | LOC401072     |
| 0.901254323 | stable | MGC45491      |
| 0.901254323 | stable | STAT1         |
| 0.901254323 | stable | SLTM          |
| 0.901347356 | stable | LOC645852     |
| 0.901347356 | stable | LOC392843     |
| 0.901443716 | stable | MACROD2       |
| 0.901443716 | stable | KRTAP4-5      |
| 0.901700228 | stable | LOC648169     |
| 0.901758432 | stable | LOC652809     |
| 0.901758432 | stable | LOC340268     |
| 0.901758432 | stable | LOC646795     |
| 0.901919305 | stable | STARD9        |
| 0.901927657 | stable | LOC644644     |
| 0.901927657 | stable | LOC648674     |
| 0.901927657 | stable | KCNK16        |
| 0.901927657 | stable | FLJ41856      |
| 0.901927657 | stable | CCDC67        |

## DEG.infomation

|             |        |           |
|-------------|--------|-----------|
| 0.901927657 | stable | ATOH7     |
| 0.901927657 | stable | LYPD4     |
| 0.901927657 | stable | ITIH3     |
| 0.901927657 | stable | LOC651991 |
| 0.901927657 | stable | KRT79     |
| 0.901927657 | stable | PSMD6     |
| 0.901927657 | stable | LOC649771 |
| 0.902081382 | stable | LOC643381 |
| 0.902156934 | stable | LOC732391 |
| 0.902191282 | stable | LECT1     |
| 0.902216528 | stable | LOC645365 |
| 0.902224441 | stable | LOC647786 |
| 0.902224441 | stable | LOC150207 |
| 0.902224441 | stable | PYY2      |
| 0.902275872 | stable | LOC643240 |
| 0.902385983 | stable | LOC641957 |
| 0.902594742 | stable | LOC652779 |
| 0.902594742 | stable | LOC391770 |
| 0.902649483 | stable | HSF5      |
| 0.90270498  | stable | B3GALT3   |
| 0.902789362 | stable | LOC650749 |
| 0.902789362 | stable | SNX15     |
| 0.902863197 | stable | ALOX12    |
| 0.902863197 | stable | LCE1E     |
| 0.902863197 | stable | LOC651963 |
| 0.902915415 | stable | OR52N1    |
| 0.902915415 | stable | C1ORF51   |
| 0.902915415 | stable | CNTNAP5   |
| 0.902995369 | stable | LOC388922 |
| 0.902995369 | stable | LOC728758 |
| 0.9030059   | stable | LOC645953 |
| 0.90314692  | stable | NR2E1     |
| 0.90337217  | stable | PLCL4     |
| 0.90337217  | stable | LOC643903 |
| 0.90337217  | stable | SNORD101  |
| 0.90337217  | stable | OR51I2    |
| 0.90337217  | stable | LOC441762 |
| 0.90337217  | stable | LIPH      |
| 0.90337217  | stable | LOC642993 |
| 0.903432446 | stable | ARHGEF15  |
| 0.903432446 | stable | POLD3     |
| 0.903537819 | stable | OR11H12   |
| 0.903683787 | stable | MREG      |
| 0.903801125 | stable | LOC652377 |
| 0.903859149 | stable | LOC649186 |
| 0.903912394 | stable | LOC646215 |
| 0.903918483 | stable | RABEP2    |
| 0.90407128  | stable | C11ORF88  |
| 0.904186668 | stable | FUT7      |
| 0.904186668 | stable | LOC648213 |
| 0.90422151  | stable | LOC647251 |

DEG.infomation

|             |        |           |
|-------------|--------|-----------|
| 0.904430264 | stable | FAM151A   |
| 0.904440363 | stable | PRR15     |
| 0.904440363 | stable | LOC643757 |
| 0.904515755 | stable | FAM70A    |
| 0.904546051 | stable | PAQR9     |
| 0.904601524 | stable | MGC40170  |
| 0.90461139  | stable | SCFD2     |
| 0.90461139  | stable | LOC643815 |
| 0.904634351 | stable | LOC220998 |
| 0.904694104 | stable | CCT6B     |
| 0.904694104 | stable | LRRC3     |
| 0.904733422 | stable | KNDC1     |
| 0.90492344  | stable | LOC653081 |
| 0.904924933 | stable | VAV2      |
| 0.904969141 | stable | LOC650632 |
| 0.904969141 | stable | LPGAT1    |
| 0.904969141 | stable | NR1I3     |
| 0.90510789  | stable | LOC647949 |
| 0.905165145 | stable | HEATR4    |
| 0.905165145 | stable | NAT2      |
| 0.905165145 | stable | STX18     |
| 0.905165145 | stable | LOC647955 |
| 0.905165145 | stable | KCNJ9     |
| 0.905200766 | stable | WDR88     |
| 0.905200766 | stable | DCXR      |
| 0.905200766 | stable | BTN1A1    |
| 0.905200766 | stable | ADD2      |
| 0.905200766 | stable | LOC647190 |
| 0.905200766 | stable | LOC645797 |
| 0.905270156 | stable | MYH13     |
| 0.905296073 | stable | WNT10A    |
| 0.905487773 | stable | LOC441056 |
| 0.905517279 | stable | MBNL3     |
| 0.905517279 | stable | HARS      |
| 0.905523145 | stable | TBC1D2B   |
| 0.905523145 | stable | KRT9      |
| 0.905539019 | stable | LOC652659 |
| 0.905539019 | stable | OR10C1    |
| 0.905598772 | stable | C20ORF74  |
| 0.905602885 | stable | LOC653346 |
| 0.905602885 | stable | CIDECP    |
| 0.905644998 | stable | LOC644846 |
| 0.906007591 | stable | LOC652775 |
| 0.906230762 | stable | MAGEH1    |
| 0.906275282 | stable | KRT7      |
| 0.906311506 | stable | LOC643175 |
| 0.906341853 | stable | SRCRB4D   |
| 0.906341853 | stable | LOC730744 |
| 0.906341853 | stable | OR5D14    |
| 0.906341853 | stable | LOC648370 |
| 0.906341853 | stable | CLCN1     |

## DEG.infomation

|             |        |           |
|-------------|--------|-----------|
| 0.906341853 | stable | ZNF525    |
| 0.906347534 | stable | FLJ37396  |
| 0.906355593 | stable | LOC652712 |
| 0.906355593 | stable | LOC650921 |
| 0.906462845 | stable | CES2      |
| 0.906462845 | stable | LOC646461 |
| 0.906741612 | stable | LOC653284 |
| 0.906741612 | stable | CEBPA     |
| 0.906966246 | stable | DSCR8     |
| 0.906966246 | stable | IL8RA     |
| 0.906966246 | stable | C12ORF56  |
| 0.906966246 | stable | TBX20     |
| 0.906966246 | stable | OR4D10    |
| 0.906966246 | stable | LOC390427 |
| 0.906984892 | stable | ATP10A    |
| 0.907043264 | stable | FAM19A5   |
| 0.907043264 | stable | RFFL      |
| 0.907048883 | stable | LOC649184 |
| 0.907102673 | stable | LOC399706 |
| 0.907102673 | stable | DGAT2L3   |
| 0.907102673 | stable | LOC646176 |
| 0.907102673 | stable | LY6D      |
| 0.907102673 | stable | LOC643444 |
| 0.907128725 | stable | LOC344167 |
| 0.907128725 | stable | EPO       |
| 0.907128725 | stable | ANK3      |
| 0.90715408  | stable | SAMM50    |
| 0.907200829 | stable | CALML3    |
| 0.907200829 | stable | ROBO2     |
| 0.907226668 | stable | MAPK1     |
| 0.907241679 | stable | KCTD8     |
| 0.907277155 | stable | NKAIN4    |
| 0.90734745  | stable | LOC650851 |
| 0.90734745  | stable | ABHD12    |
| 0.907372049 | stable | C18ORF54  |
| 0.907543701 | stable | ANKRD34C  |
| 0.907561341 | stable | LOC648025 |
| 0.907561341 | stable | LOC653978 |
| 0.907561341 | stable | RPGRIP1   |
| 0.907561341 | stable | OR13F1    |
| 0.90756341  | stable | CR2       |
| 0.907693927 | stable | IL1F7     |
| 0.907693927 | stable | MMP20     |
| 0.907711528 | stable | LOC441368 |
| 0.907713371 | stable | C2ORF57   |
| 0.907744678 | stable | MMP27     |
| 0.907775891 | stable | LOC652483 |
| 0.907775891 | stable | PCK1      |
| 0.907915453 | stable | LOC642147 |
| 0.907942728 | stable | FLJ22639  |
| 0.908043591 | stable | SPECC1    |

## DEG.infomation

|             |        |           |
|-------------|--------|-----------|
| 0.908043591 | stable | SPAST     |
| 0.908043591 | stable | LIPK      |
| 0.908070754 | stable | SLC5A4    |
| 0.908181351 | stable | XPNPEP2   |
| 0.908238977 | stable | LOC652683 |
| 0.908238977 | stable | LOC728660 |
| 0.908319007 | stable | WDR21A    |
| 0.908319007 | stable | TSGA13    |
| 0.908360673 | stable | ALX4      |
| 0.908360673 | stable | LOC642624 |
| 0.908471915 | stable | LOC390531 |
| 0.908484971 | stable | APOF      |
| 0.908603041 | stable | LRRIQ1    |
| 0.908654475 | stable | LOC647621 |
| 0.908683453 | stable | MYO7B     |
| 0.908683453 | stable | KLK4      |
| 0.908683453 | stable | ODF4      |
| 0.908742605 | stable | DCBLD2    |
| 0.908754765 | stable | LOC653605 |
| 0.908754765 | stable | LOC642688 |
| 0.908768011 | stable | NXT2      |
| 0.908768011 | stable | C10ORF81  |
| 0.908998849 | stable | TREML3    |
| 0.909087863 | stable | LOC650538 |
| 0.909136723 | stable | HHIPL1    |
| 0.909181087 | stable | LOC647589 |
| 0.909261662 | stable | RNF181    |
| 0.909306344 | stable | LOC645200 |
| 0.909690621 | stable | TRIM11    |
| 0.909690621 | stable | DLL4      |
| 0.909720615 | stable | TAKR      |
| 0.909735834 | stable | KLRC1     |
| 0.909735834 | stable | LOC644569 |
| 0.90987353  | stable | LOC645320 |
| 0.90987353  | stable | FGF10     |
| 0.90987353  | stable | ZNF124    |
| 0.909911089 | stable | LOC134541 |
| 0.909946031 | stable | TPH1      |
| 0.909977766 | stable | MGC52498  |
| 0.90999058  | stable | RETNLB    |
| 0.909994686 | stable | LOC440277 |
| 0.909994686 | stable | LOC648748 |
| 0.910086414 | stable | MGC42630  |
| 0.910086414 | stable | ZP1       |
| 0.910086414 | stable | RFNG      |
| 0.910086414 | stable | RBM35B    |
| 0.910086414 | stable | ZNF516    |
| 0.910093425 | stable | SPANXN3   |
| 0.910093425 | stable | LOC653110 |
| 0.910135007 | stable | LOC651079 |
| 0.910135007 | stable | BAHD1     |

## DEG.infomation

|             |        |           |
|-------------|--------|-----------|
| 0.910135007 | stable | LOC440888 |
| 0.910135007 | stable | MUC13     |
| 0.910135007 | stable | LOC136242 |
| 0.910135007 | stable | MGC39581  |
| 0.910148975 | stable | NOX1      |
| 0.910148975 | stable | CFC1B     |
| 0.910148975 | stable | TMEM211   |
| 0.910148975 | stable | LOC648846 |
| 0.910208801 | stable | GPR148    |
| 0.91029479  | stable | LOC648976 |
| 0.910362341 | stable | LOC649926 |
| 0.910362341 | stable | ARNT      |
| 0.910362341 | stable | LOC390507 |
| 0.910362341 | stable | SIX1      |
| 0.910362341 | stable | LOC645790 |
| 0.910362341 | stable | FARP2     |
| 0.91037817  | stable | LINCR     |
| 0.910424606 | stable | LOC642237 |
| 0.910543144 | stable | LOC642846 |
| 0.910543144 | stable | LOC649436 |
| 0.910611238 | stable | NDRG1     |
| 0.910611238 | stable | C16ORF61  |
| 0.910611238 | stable | ADAMTS18  |
| 0.910611238 | stable | DLGAP2    |
| 0.910934468 | stable | P2RX2     |
| 0.910934468 | stable | ELOVL7    |
| 0.910935251 | stable | PRPF39    |
| 0.911085586 | stable | TMEM174   |
| 0.911085586 | stable | LSMD1     |
| 0.911085586 | stable | LOC648905 |
| 0.911102306 | stable | KCNA6     |
| 0.911173953 | stable | LOC654200 |
| 0.911173953 | stable | YWHAE     |
| 0.911173953 | stable | LOC652367 |
| 0.911173953 | stable | ZNF180    |
| 0.911173953 | stable | CCDC76    |
| 0.911173953 | stable | ANKRD17   |
| 0.911173953 | stable | VPS26A    |
| 0.911173953 | stable | LOC647174 |
| 0.911173953 | stable | VISA      |
| 0.911173953 | stable | LOC647827 |
| 0.911180598 | stable | NODAL     |
| 0.911242049 | stable | MGC3196   |
| 0.911242049 | stable | ALG10B    |
| 0.911242049 | stable | LOC651158 |
| 0.911242049 | stable | KIF2C     |
| 0.911402651 | stable | FOXG1     |
| 0.911402651 | stable | DTNB      |
| 0.911402651 | stable | ST8SIA3   |
| 0.911402651 | stable | LOC729025 |
| 0.911510324 | stable | PITPNM3   |

## DEG.infomation

|             |        |           |
|-------------|--------|-----------|
| 0.911590776 | stable | SDAD1     |
| 0.911628113 | stable | ALB       |
| 0.911628113 | stable | RGS8      |
| 0.911628113 | stable | LOC650427 |
| 0.911628113 | stable | CCDC142   |
| 0.911756786 | stable | CXORF59   |
| 0.911810462 | stable | LOC651763 |
| 0.911870792 | stable | LOC653751 |
| 0.91187909  | stable | LOC652234 |
| 0.911918524 | stable | MYO15A    |
| 0.911920858 | stable | PNOC      |
| 0.911920858 | stable | CIB2      |
| 0.911920858 | stable | ITGA6     |
| 0.911946544 | stable | LOC642693 |
| 0.911946544 | stable | LOC643140 |
| 0.911969877 | stable | LOC85390  |
| 0.912071334 | stable | LOC643359 |
| 0.912071334 | stable | RAB11B    |
| 0.912071334 | stable | LOC652525 |
| 0.912071334 | stable | NEK10     |
| 0.912071957 | stable | C1ORF226  |
| 0.912110291 | stable | MTAP      |
| 0.912128046 | stable | LOC650874 |
| 0.912128046 | stable | CD160     |
| 0.912128046 | stable | PNPLA1    |
| 0.912128046 | stable | LOC642895 |
| 0.912128046 | stable | CCDC126   |
| 0.912128046 | stable | KRTAP19-6 |
| 0.912128046 | stable | LOC652048 |
| 0.912128046 | stable | SPRED2    |
| 0.912128046 | stable | WNT1      |
| 0.912182008 | stable | MORF4L1   |
| 0.912264015 | stable | KCNC2     |
| 0.912264015 | stable | MBTPS1    |
| 0.912264015 | stable | SIX4      |
| 0.912279218 | stable | PNMA3     |
| 0.912349866 | stable | LOC645043 |
| 0.912349866 | stable | LOC648758 |
| 0.912397371 | stable | TFDP3     |
| 0.912535791 | stable | ABCB1     |
| 0.912535791 | stable | SPAG17    |
| 0.912535791 | stable | GIMAP4    |
| 0.912535791 | stable | ZNF192    |
| 0.912535791 | stable | LOC642538 |
| 0.912535791 | stable | ZNF584    |
| 0.912535791 | stable | LRRC17    |
| 0.912590636 | stable | LOC644899 |
| 0.912629164 | stable | LOC387931 |
| 0.912636461 | stable | MAGEL2    |
| 0.912636461 | stable | C6ORF134  |
| 0.912636461 | stable | UXT       |



## DEG.infomation

|             |        |           |
|-------------|--------|-----------|
| 0.912636461 | stable | LOC651362 |
| 0.912636461 | stable | TARBP2    |
| 0.912636461 | stable | SLC22A11  |
| 0.912636461 | stable | TMPRSS11E |
| 0.912691157 | stable | RGPD1     |
| 0.912905086 | stable | LOC641945 |
| 0.912905086 | stable | ZDHHC11B  |
| 0.912905086 | stable | NPNT      |
| 0.912915295 | stable | PRRX2     |
| 0.913038241 | stable | SNORD28   |
| 0.913253326 | stable | RABIF     |
| 0.913343669 | stable | LOC648408 |
| 0.913424428 | stable | LOC651296 |
| 0.91342548  | stable | IGSF11    |
| 0.913439763 | stable | ZNF131    |
| 0.913439763 | stable | ATP4B     |
| 0.913682761 | stable | LIMD2     |
| 0.913696753 | stable | LOC642648 |
| 0.913696753 | stable | ERN2      |
| 0.91378236  | stable | ACTRT1    |
| 0.913787529 | stable | C12ORF66  |
| 0.913798015 | stable | MARCH9    |
| 0.913811596 | stable | MTFMT     |
| 0.913878786 | stable | LOC730145 |
| 0.913999686 | stable | ZNF354A   |
| 0.914053936 | stable | LOC647370 |
| 0.914053936 | stable | PSMD5     |
| 0.914053936 | stable | LOC441086 |
| 0.914053936 | stable | CTNBL1    |
| 0.914053936 | stable | LOC651581 |
| 0.914053936 | stable | FCGR3A    |
| 0.914053936 | stable | ZNF239    |
| 0.914078495 | stable | OFCC1     |
| 0.914078495 | stable | KLC2      |
| 0.914078495 | stable | CHP       |
| 0.914131905 | stable | N6AMT2    |
| 0.914239775 | stable | TRIM10    |
| 0.914365637 | stable | PLP1      |
| 0.91436915  | stable | OR4D6     |
| 0.91436915  | stable | LOC200726 |
| 0.91436915  | stable | GDNF      |
| 0.91436915  | stable | NDUFB8    |
| 0.91436915  | stable | LOC650217 |
| 0.914381921 | stable | BCAP29    |
| 0.914417694 | stable | LCE1F     |
| 0.914417694 | stable | GBF1      |
| 0.914417694 | stable | OR2T1     |
| 0.914444341 | stable | LOC643479 |
| 0.914482677 | stable | LOC653808 |
| 0.914482677 | stable | BICC1     |
| 0.914500823 | stable | FANCF     |

## DEG.infomation

|             |        |           |
|-------------|--------|-----------|
| 0.91459448  | stable | KLK12     |
| 0.914662489 | stable | LOC649676 |
| 0.914858663 | stable | UNQ5830   |
| 0.914858663 | stable | LOC648603 |
| 0.915071275 | stable | ITGB1BP2  |
| 0.915074623 | stable | LOC651287 |
| 0.915074623 | stable | LOC654114 |
| 0.915074623 | stable | LOC650010 |
| 0.915074623 | stable | LOC650005 |
| 0.915074623 | stable | DDX27     |
| 0.915074623 | stable | NARG1L    |
| 0.915074623 | stable | LOC647541 |
| 0.915074623 | stable | RLBP1L1   |
| 0.915117791 | stable | LOC643246 |
| 0.915117791 | stable | MGC10646  |
| 0.915117791 | stable | MAGEB1    |
| 0.915237602 | stable | LOC646607 |
| 0.915241834 | stable | LOC649946 |
| 0.915293792 | stable | FSTL5     |
| 0.915293792 | stable | LOC645580 |
| 0.915293792 | stable | LGR6      |
| 0.915302091 | stable | TRIM48    |
| 0.91532902  | stable | RELN      |
| 0.91532902  | stable | SLC7A11   |
| 0.91532902  | stable | GRM5      |
| 0.91532902  | stable | LOC654116 |
| 0.915331027 | stable | FLJ31132  |
| 0.915403309 | stable | C8G       |
| 0.915543929 | stable | LOC401056 |
| 0.915608376 | stable | DRG1      |
| 0.91565345  | stable | LOC642616 |
| 0.91565345  | stable | LOC644578 |
| 0.91565345  | stable | CCDC62    |
| 0.91565345  | stable | LYRM1     |
| 0.91565345  | stable | MGC119295 |
| 0.915701177 | stable | LOC647723 |
| 0.915809635 | stable | KRTAP22-1 |
| 0.915857937 | stable | DDAH2     |
| 0.915910603 | stable | DEFB106A  |
| 0.915998914 | stable | LOC402110 |
| 0.916042727 | stable | LOC152667 |
| 0.916042727 | stable | C1ORF192  |
| 0.916210258 | stable | LOC644826 |
| 0.916402821 | stable | JPH2      |
| 0.916445118 | stable | PVALB     |
| 0.916445118 | stable | TSPAN1    |
| 0.916445118 | stable | TMEM1     |
| 0.916445118 | stable | LOC653080 |
| 0.916445118 | stable | CCL4L1    |
| 0.916445118 | stable | LIM2      |
| 0.91650845  | stable | LOC642856 |

## DEG.infomation

|             |        |           |
|-------------|--------|-----------|
| 0.916613665 | stable | OR2T2     |
| 0.916792114 | stable | LOC441066 |
| 0.916797939 | stable | LOC648533 |
| 0.916966085 | stable | POU3F1    |
| 0.917024868 | stable | C17ORF54  |
| 0.917368192 | stable | EMG1      |
| 0.917368192 | stable | IPO9      |
| 0.917368192 | stable | LOC644853 |
| 0.917368192 | stable | LIMD1     |
| 0.917458468 | stable | KIAA1409  |
| 0.917458468 | stable | LOC647281 |
| 0.917458468 | stable | LOC650810 |
| 0.917547994 | stable | AATK      |
| 0.917547994 | stable | MYO5C     |
| 0.917638905 | stable | GEMIN5    |
| 0.917638905 | stable | FLI1      |
| 0.917638905 | stable | LOC649921 |
| 0.917638905 | stable | OR10A7    |
| 0.917654622 | stable | ZNF792    |
| 0.917654622 | stable | LOC652379 |
| 0.917654622 | stable | DLEU2L    |
| 0.917654622 | stable | LOC647439 |
| 0.917654622 | stable | PTPN5     |
| 0.918034439 | stable | ZNF343    |
| 0.91803593  | stable | CASC5     |
| 0.918117053 | stable | LOC643451 |
| 0.918117053 | stable | STAR      |
| 0.91818704  | stable | LOC644480 |
| 0.91818704  | stable | LOC649773 |
| 0.91818704  | stable | FILIP1    |
| 0.91818704  | stable | DNAH11    |
| 0.91818704  | stable | MYST2     |
| 0.91818704  | stable | A26C1B    |
| 0.91818704  | stable | OR2T35    |
| 0.91818704  | stable | LOC441799 |
| 0.91818704  | stable | DDX20     |
| 0.91818704  | stable | TRAPPC1   |
| 0.91818704  | stable | LOC645133 |
| 0.91818704  | stable | CALML4    |
| 0.91818704  | stable | SLC6A14   |
| 0.91818704  | stable | C15ORF28  |
| 0.91818704  | stable | MRPL33    |
| 0.918201298 | stable | TMEM151   |
| 0.918201298 | stable | ZSCAN2    |
| 0.918201298 | stable | C11ORF47  |
| 0.918579762 | stable | SKAP1     |
| 0.918579762 | stable | RGPD2     |
| 0.918607311 | stable | LOC643186 |
| 0.918607311 | stable | LOC642166 |
| 0.918627558 | stable | ANKS4B    |
| 0.918650419 | stable | MRPL27    |

## DEG.infomation

|             |        |           |
|-------------|--------|-----------|
| 0.918841909 | stable | SPANXC    |
| 0.918841909 | stable | LOC642032 |
| 0.918841909 | stable | LOC649112 |
| 0.918940572 | stable | LOC641987 |
| 0.918970086 | stable | FLJ46010  |
| 0.918970086 | stable | SLC43A2   |
| 0.918970086 | stable | USP30     |
| 0.918978997 | stable | ZNF710    |
| 0.918985609 | stable | LOC646779 |
| 0.919142773 | stable | CACNG1    |
| 0.919142773 | stable | OSTALPHA  |
| 0.919187343 | stable | NDOR1     |
| 0.919327275 | stable | MRE11A    |
| 0.919327275 | stable | B3GNT4    |
| 0.919327275 | stable | CYP2C18   |
| 0.919361039 | stable | WDR44     |
| 0.919423784 | stable | LOC644897 |
| 0.919423784 | stable | LOC653520 |
| 0.919558078 | stable | LOC652368 |
| 0.919610398 | stable | FRG1      |
| 0.919615781 | stable | LOC642017 |
| 0.919615781 | stable | FAM66E    |
| 0.919615781 | stable | PLB1      |
| 0.919615781 | stable | LOC642701 |
| 0.919615781 | stable | LOC727752 |
| 0.919656026 | stable | KLHL5     |
| 0.919656026 | stable | TMEM83    |
| 0.919656026 | stable | LOC646396 |
| 0.919656026 | stable | FLJ22795  |
| 0.919656026 | stable | LOC646799 |
| 0.919656026 | stable | GCKR      |
| 0.919656026 | stable | LOC728493 |
| 0.919688635 | stable | LOC649993 |
| 0.919823461 | stable | DMXL2     |
| 0.919823461 | stable | LOC651589 |
| 0.919834945 | stable | LOC644117 |
| 0.919869129 | stable | LOC340900 |
| 0.920018621 | stable | LOC642843 |
| 0.920204286 | stable | LOC642204 |
| 0.920204286 | stable | C19ORF20  |
| 0.920216763 | stable | IFITM4P   |
| 0.920461993 | stable | MAP3K13   |
| 0.920553597 | stable | UQCRFS1   |
| 0.920562203 | stable | LOC727992 |
| 0.920562203 | stable | LOC339862 |
| 0.920588679 | stable | CSMD2     |
| 0.920625748 | stable | LOC650154 |
| 0.920718549 | stable | C15ORF42  |
| 0.920854639 | stable | LOC653765 |
| 0.921300248 | stable | LOC654164 |
| 0.921335205 | stable | PHKG1     |

DEG.infomation

|             |        |           |
|-------------|--------|-----------|
| 0.921408124 | stable | TMEM9B    |
| 0.921408124 | stable | REG1A     |
| 0.921510717 | stable | LOC650943 |
| 0.921510717 | stable | ATP5G2    |
| 0.921510717 | stable | CPB2      |
| 0.921603849 | stable | UVRAG     |
| 0.921603849 | stable | OR6B3     |
| 0.921716113 | stable | LOC729266 |
| 0.921750781 | stable | BDH1      |
| 0.921750781 | stable | HNRNPL    |
| 0.921750781 | stable | LOC728226 |
| 0.921815719 | stable | MCM3AP    |
| 0.921907466 | stable | LOC652800 |
| 0.921924837 | stable | LOC728956 |
| 0.921924837 | stable | ERAS      |
| 0.921924837 | stable | FETUB     |
| 0.921924837 | stable | OR5C1     |
| 0.921955708 | stable | LOC648469 |
| 0.921995219 | stable | LOC339789 |
| 0.921995219 | stable | PITX2     |
| 0.921995219 | stable | TLL8      |
| 0.921995219 | stable | GGTLC2    |
| 0.921995219 | stable | KIF3B     |
| 0.921995219 | stable | LOC646892 |
| 0.922168334 | stable | LOC649238 |
| 0.922248208 | stable | KRT6C     |
| 0.922407166 | stable | ORM1      |
| 0.922600429 | stable | MRGPRD    |
| 0.922600429 | stable | CPO       |
| 0.922786935 | stable | LOC652472 |
| 0.922786935 | stable | LOC648132 |
| 0.922786935 | stable | LOC729218 |
| 0.922786935 | stable | PASK      |
| 0.922828443 | stable | LAMB1     |
| 0.922828443 | stable | LOC731227 |
| 0.922828443 | stable | LOC440836 |
| 0.922828443 | stable | C8B       |
| 0.922831159 | stable | LOC652185 |
| 0.922858473 | stable | GPR152    |
| 0.922858473 | stable | FANCA     |
| 0.922858473 | stable | CSH2      |
| 0.922858473 | stable | LOC652652 |
| 0.922858473 | stable | C15ORF55  |
| 0.922858473 | stable | LOC338805 |
| 0.922858473 | stable | CHRNA9    |
| 0.922858473 | stable | MEIS3     |
| 0.922858473 | stable | ELA2A     |
| 0.922858473 | stable | LOC730546 |
| 0.922858473 | stable | LOC643664 |
| 0.922858473 | stable | TSHR      |
| 0.922858473 | stable | SLC45A2   |

## DEG.infomation

|             |        |              |
|-------------|--------|--------------|
| 0.922858473 | stable | LOC647448    |
| 0.9228949   | stable | PACAP        |
| 0.9228949   | stable | RNFT1        |
| 0.922905842 | stable | ZNRF4        |
| 0.922944389 | stable | OR52B2       |
| 0.92294529  | stable | PCDHA10      |
| 0.92294529  | stable | CCNL2        |
| 0.92294529  | stable | SLC25A29     |
| 0.922972002 | stable | SERPINA7     |
| 0.923031249 | stable | FOXE3        |
| 0.923055647 | stable | UBXD7        |
| 0.92325801  | stable | GPR155       |
| 0.923467979 | stable | LOC442015    |
| 0.923467979 | stable | OR11A1       |
| 0.923513242 | stable | ABCA3        |
| 0.923677004 | stable | HDAC6        |
| 0.923680896 | stable | LOC653496    |
| 0.923696603 | stable | SFTPD        |
| 0.923715175 | stable | LRGUK        |
| 0.923807872 | stable | LOC100101266 |
| 0.923807872 | stable | LOC731431    |
| 0.923825676 | stable | SEMA4F       |
| 0.923858155 | stable | LOC650346    |
| 0.923878432 | stable | BDKRB1       |
| 0.92393187  | stable | LOC283824    |
| 0.924097533 | stable | KLKBL4       |
| 0.924097533 | stable | LMX1B        |
| 0.924108772 | stable | LOC652038    |
| 0.924108772 | stable | LOC222699    |
| 0.924224769 | stable | LOC650009    |
| 0.924405488 | stable | SCN11A       |
| 0.924431579 | stable | TMEM101      |
| 0.924468063 | stable | WDHD1        |
| 0.924468063 | stable | LOC643612    |
| 0.9245952   | stable | OR10H4       |
| 0.924640675 | stable | MGC42638     |
| 0.924649545 | stable | ICAM5        |
| 0.924741014 | stable | LOC648754    |
| 0.924741014 | stable | LOC647279    |
| 0.92476845  | stable | FAM55D       |
| 0.92476845  | stable | NAPSA        |
| 0.924777061 | stable | LOC647719    |
| 0.924777061 | stable | DHX16        |
| 0.92497893  | stable | ULBP1        |
| 0.92497893  | stable | OTUD6A       |
| 0.92497893  | stable | CACNB2       |
| 0.92497893  | stable | C1QL3        |
| 0.924997345 | stable | GALNT8       |
| 0.925060219 | stable | CTF8         |
| 0.925104878 | stable | WFIKKN2      |
| 0.925104878 | stable | SIPA1L3      |

## DEG.infomation

|             |        |           |
|-------------|--------|-----------|
| 0.925166301 | stable | GRM4      |
| 0.925315115 | stable | SNX32     |
| 0.925353884 | stable | COX6B2    |
| 0.925460856 | stable | LOC646047 |
| 0.925484591 | stable | SPAG4L    |
| 0.925523384 | stable | LOC653878 |
| 0.925721281 | stable | LOC729569 |
| 0.925721281 | stable | LOC400891 |
| 0.925721281 | stable | LOC648548 |
| 0.925721281 | stable | OR6K6     |
| 0.925721281 | stable | HNRNPA3P1 |
| 0.925721281 | stable | LOC650883 |
| 0.925721281 | stable | CPA4      |
| 0.925730022 | stable | TMPRSS5   |
| 0.925763366 | stable | LOC402145 |
| 0.92589445  | stable | HSP90AB4P |
| 0.925930687 | stable | MARK2     |
| 0.925930687 | stable | FCGR3B    |
| 0.926044196 | stable | TMEM203   |
| 0.926071658 | stable | ACOXL     |
| 0.926081581 | stable | OR51Q1    |
| 0.926081581 | stable | VMAC      |
| 0.926170924 | stable | ZBTB34    |
| 0.926218344 | stable | YDD19     |
| 0.926310173 | stable | LOC650014 |
| 0.926310173 | stable | LOC644335 |
| 0.926310173 | stable | NRXN1     |
| 0.926310173 | stable | LOC729164 |
| 0.92633407  | stable | LOC645253 |
| 0.926391365 | stable | LOC387647 |
| 0.926416187 | stable | FBXO46    |
| 0.926451492 | stable | GRSF1     |
| 0.926471312 | stable | LOC647542 |
| 0.926497934 | stable | OR5L2     |
| 0.926511972 | stable | LOC132203 |
| 0.926538326 | stable | LOC731050 |
| 0.926538326 | stable | RASSF10   |
| 0.926538326 | stable | CARTPT    |
| 0.926538326 | stable | LOC390829 |
| 0.926538326 | stable | LOC652080 |
| 0.926538326 | stable | NKX2-2    |
| 0.926538326 | stable | FGF19     |
| 0.926538326 | stable | GRLF1     |
| 0.926629022 | stable | GTF2A1    |
| 0.926629022 | stable | SEPT3     |
| 0.926822636 | stable | OR5B2     |
| 0.926933527 | stable | LOC645994 |
| 0.926958877 | stable | LOC401629 |
| 0.926980812 | stable | IFNA16    |
| 0.927014906 | stable | LOC650681 |
| 0.927019774 | stable | FLJ33590  |

DEG.infomation

|             |        |           |
|-------------|--------|-----------|
| 0.927063606 | stable | LOC731170 |
| 0.927169112 | stable | LOC644045 |
| 0.927169112 | stable | LOC646283 |
| 0.927169112 | stable | OPRL1     |
| 0.927240729 | stable | LOC652894 |
| 0.927294818 | stable | LOC441426 |
| 0.927294818 | stable | PUS3      |
| 0.927294818 | stable | LOC648993 |
| 0.927294818 | stable | OR4F15    |
| 0.927294818 | stable | AARS2     |
| 0.927294818 | stable | KIF14     |
| 0.927300267 | stable | SLCO1B1   |
| 0.927301028 | stable | LOC647250 |
| 0.927395599 | stable | SERP2     |
| 0.927439701 | stable | CRB2      |
| 0.927439701 | stable | C7ORF30   |
| 0.927665494 | stable | MRGPRX4   |
| 0.927902136 | stable | MED18     |
| 0.927939632 | stable | LOC646376 |
| 0.927980449 | stable | KLK9      |
| 0.928165868 | stable | OR6B2     |
| 0.928231124 | stable | GZMM      |
| 0.928231124 | stable | LOC651933 |
| 0.928357336 | stable | COPS5     |
| 0.928357336 | stable | LOC643328 |
| 0.928358349 | stable | SFTPA2B   |
| 0.928358349 | stable | LOC644662 |
| 0.928378882 | stable | FOXN2     |
| 0.928378882 | stable | C1ORF69   |
| 0.928556771 | stable | TTY4C     |
| 0.928556771 | stable | LOC731827 |
| 0.928564    | stable | LOC642611 |
| 0.928564    | stable | AGER      |
| 0.928615418 | stable | ITGB1BP1  |
| 0.928647008 | stable | NDST3     |
| 0.928647008 | stable | RND1      |
| 0.928657932 | stable | LOC645643 |
| 0.928708217 | stable | LOC402199 |
| 0.928711456 | stable | RASGRP4   |
| 0.928736277 | stable | RHCE      |
| 0.929043188 | stable | LOC150383 |
| 0.929146748 | stable | RNASEH1   |
| 0.929258179 | stable | LOC391574 |
| 0.929292528 | stable | KIAA0415  |
| 0.929292528 | stable | PPIF      |
| 0.929292528 | stable | TCTE3     |
| 0.929343918 | stable | DCLRE1C   |
| 0.929387693 | stable | LOC646881 |
| 0.929449689 | stable | PIP5K3    |
| 0.929624949 | stable | LOC651619 |
| 0.929848266 | stable | SLC7A5P1  |



DEG.infomation

|             |        |           |
|-------------|--------|-----------|
| 0.929898213 | stable | ASB8      |
| 0.929898213 | stable | INPP4A    |
| 0.92990544  | stable | LOC649094 |
| 0.92990544  | stable | ARHGAP11B |
| 0.92990544  | stable | LOC653397 |
| 0.929956277 | stable | LOC653684 |
| 0.929978347 | stable | LOC645563 |
| 0.93003952  | stable | IL21R     |
| 0.93003952  | stable | GDPD1     |
| 0.93003952  | stable | HIRA      |
| 0.93003952  | stable | GNRHR2    |
| 0.93003952  | stable | RBMXL2    |
| 0.930078725 | stable | LOC648541 |
| 0.930105858 | stable | SERPINA13 |
| 0.930149775 | stable | CXORF42   |
| 0.930149775 | stable | DRD3      |
| 0.930149775 | stable | LOC653635 |
| 0.930165974 | stable | LOC732058 |
| 0.930165974 | stable | LOC283887 |
| 0.930194083 | stable | AURKB     |
| 0.930194083 | stable | CD300LB   |
| 0.93020676  | stable | FLJ33706  |
| 0.930244581 | stable | LOC646471 |
| 0.930310369 | stable | LOC652184 |
| 0.930373871 | stable | DSCR9     |
| 0.930373871 | stable | SPIC      |
| 0.930373871 | stable | SPERT     |
| 0.930373871 | stable | FLJ20209  |
| 0.930449936 | stable | CCDC80    |
| 0.930449936 | stable | PCDHA8    |
| 0.930504869 | stable | LOC653574 |
| 0.930504869 | stable | FGB       |
| 0.930504869 | stable | LOC646074 |
| 0.930504869 | stable | LOC440438 |
| 0.930504869 | stable | FLJ42957  |
| 0.930504869 | stable | TRMT2A    |
| 0.930504869 | stable | LOC653702 |
| 0.930504869 | stable | LOC652163 |
| 0.930504869 | stable | GPR156    |
| 0.930504869 | stable | GRXCR1    |
| 0.930504869 | stable | VTA1      |
| 0.930504869 | stable | LOC648620 |
| 0.930504869 | stable | OVCH1     |
| 0.930504869 | stable | FUNDC2    |
| 0.9305653   | stable | CDY1B     |
| 0.9305653   | stable | SPRR2E    |
| 0.930605831 | stable | KBTBD2    |
| 0.930605831 | stable | TMEM184A  |
| 0.93062289  | stable | LOC646521 |
| 0.93062289  | stable | SGCZ      |
| 0.93062289  | stable | ZFATAS    |

## DEG.infomation

|             |        |           |
|-------------|--------|-----------|
| 0.93062289  | stable | LOC645694 |
| 0.93062289  | stable | LOC654220 |
| 0.93062289  | stable | LOC652300 |
| 0.93062289  | stable | TAS2R46   |
| 0.93062289  | stable | RPL23     |
| 0.93062289  | stable | LY6G6F    |
| 0.930765798 | stable | TLL2      |
| 0.930801198 | stable | SPINK5L3  |
| 0.930801198 | stable | LOC652450 |
| 0.930801198 | stable | OR9Q2     |
| 0.930801198 | stable | C13ORF23  |
| 0.930801198 | stable | LOC653537 |
| 0.930917264 | stable | MVD       |
| 0.930949804 | stable | LOC646750 |
| 0.930949804 | stable | FAM92B    |
| 0.930949804 | stable | CRCT1     |
| 0.930949804 | stable | OLAH      |
| 0.930949804 | stable | LOC653669 |
| 0.930949804 | stable | LOC388814 |
| 0.930949804 | stable | LOC390530 |
| 0.930949804 | stable | LOC642659 |
| 0.930949804 | stable | C16ORF52  |
| 0.930949804 | stable | FLJ46020  |
| 0.930949804 | stable | C9ORF11   |
| 0.930949804 | stable | NFIC      |
| 0.930980572 | stable | C1ORF138  |
| 0.931056556 | stable | BCKDHB    |
| 0.931117374 | stable | LOC645915 |
| 0.931174179 | stable | LOC643438 |
| 0.93118919  | stable | A2ML1     |
| 0.93118919  | stable | LOC647015 |
| 0.93118919  | stable | TCEAL6    |
| 0.93118919  | stable | OR7C2     |
| 0.93118919  | stable | LOC126860 |
| 0.931233705 | stable | ACSM1     |
| 0.931233705 | stable | SERPINA6  |
| 0.931233705 | stable | PTCD1     |
| 0.931233705 | stable | LOC650628 |
| 0.931233705 | stable | TPI1      |
| 0.931259535 | stable | MAN1C1    |
| 0.931379378 | stable | RNF8      |
| 0.931389601 | stable | LOC649783 |
| 0.931514963 | stable | LOC648220 |
| 0.931594918 | stable | LOC646400 |
| 0.931594918 | stable | NTF5      |
| 0.931594918 | stable | LOC645737 |
| 0.931594918 | stable | AFAR3     |
| 0.931594918 | stable | LOC652875 |
| 0.931594918 | stable | LOC641975 |
| 0.931594918 | stable | LOC642384 |
| 0.931644092 | stable | LOC648173 |

## DEG.infomation

|             |        |           |
|-------------|--------|-----------|
| 0.931644092 | stable | FLJ35740  |
| 0.931644092 | stable | MMP12     |
| 0.931644092 | stable | DZIP1L    |
| 0.931644092 | stable | C14ORF101 |
| 0.931644092 | stable | LOC650843 |
| 0.931667807 | stable | LOC644994 |
| 0.931716937 | stable | LOC642714 |
| 0.931716937 | stable | C2ORF44   |
| 0.931716937 | stable | CLDN16    |
| 0.931716937 | stable | BIN1      |
| 0.931716937 | stable | LOC440059 |
| 0.931716937 | stable | LOC729485 |
| 0.931756403 | stable | OR2T27    |
| 0.931756403 | stable | LOC402377 |
| 0.931756403 | stable | EGR4      |
| 0.931756403 | stable | ARSE      |
| 0.931756403 | stable | BRWD2     |
| 0.931761511 | stable | LOC653580 |
| 0.931773869 | stable | BLVRB     |
| 0.931781433 | stable | LOC649248 |
| 0.931821185 | stable | LOC652771 |
| 0.931821185 | stable | LOC644612 |
| 0.932067635 | stable | LOC389631 |
| 0.932067635 | stable | KRT14     |
| 0.932167581 | stable | MPHOSPH6  |
| 0.932217241 | stable | ARFGAP2   |
| 0.932487106 | stable | LOC644925 |
| 0.932487106 | stable | LOC646782 |
| 0.932487106 | stable | LOC644143 |
| 0.932557331 | stable | LOC149086 |
| 0.932557331 | stable | SLITRK2   |
| 0.932557331 | stable | TOMM70A   |
| 0.932607435 | stable | LOC647806 |
| 0.932607435 | stable | WNT2      |
| 0.93267276  | stable | TMEM50B   |
| 0.93267276  | stable | DEFB104A  |
| 0.93267276  | stable | EGFL6     |
| 0.93267276  | stable | AOX2P     |
| 0.93267276  | stable | SNORD31   |
| 0.932688027 | stable | FAM111B   |
| 0.932696755 | stable | LOC649974 |
| 0.932696755 | stable | ANKRD34B  |
| 0.932708316 | stable | LOC645485 |
| 0.932708316 | stable | PVRL4     |
| 0.932708316 | stable | FBXL19    |
| 0.932708316 | stable | KCNAB3    |
| 0.932708316 | stable | NUMBL     |
| 0.932715487 | stable | LOC645325 |
| 0.932976047 | stable | LOC645066 |
| 0.932998701 | stable | TULP2     |
| 0.933029438 | stable | SPAG6     |

## DEG.infomation

|             |        |           |
|-------------|--------|-----------|
| 0.933094569 | stable | LOC653941 |
| 0.933094569 | stable | FLT4      |
| 0.933143932 | stable | PABPC4    |
| 0.933283034 | stable | FLJ90086  |
| 0.933445145 | stable | LOC644068 |
| 0.933445145 | stable | AQP11     |
| 0.933489032 | stable | LOC644420 |
| 0.933599571 | stable | C7ORF16   |
| 0.933599571 | stable | LOC644957 |
| 0.933650355 | stable | LOC643339 |
| 0.933666054 | stable | PMS2L11   |
| 0.933666054 | stable | GF11B     |
| 0.933666054 | stable | OR10A2    |
| 0.933667213 | stable | KPNA6     |
| 0.933875124 | stable | AGMAT     |
| 0.933894099 | stable | LOC391013 |
| 0.933894099 | stable | LOC650845 |
| 0.934082869 | stable | NR1I2     |
| 0.934082869 | stable | CTDSP2    |
| 0.934082869 | stable | LOC641944 |
| 0.934082869 | stable | LOC651289 |
| 0.934082869 | stable | DLG3      |
| 0.934082869 | stable | LOC732139 |
| 0.934082869 | stable | LOC730656 |
| 0.934082869 | stable | ADAM28    |
| 0.934082869 | stable | LOC144383 |
| 0.934082869 | stable | LOC648176 |
| 0.934082869 | stable | LIN28B    |
| 0.934082869 | stable | LOC649503 |
| 0.934082869 | stable | C1ORF84   |
| 0.934082869 | stable | LOC645246 |
| 0.934082869 | stable | GPR141    |
| 0.934082869 | stable | TCP10L2   |
| 0.934082869 | stable | ROBO4     |
| 0.934082869 | stable | LOC401934 |
| 0.934082869 | stable | LOC391124 |
| 0.934082869 | stable | MYLFP     |
| 0.934082869 | stable | LOC643420 |
| 0.934082869 | stable | LOC648454 |
| 0.934157577 | stable | ABCB8     |
| 0.93418532  | stable | SGOL1     |
| 0.934201604 | stable | LOC133993 |
| 0.934250403 | stable | RRM2      |
| 0.934301189 | stable | QRFP      |
| 0.934350428 | stable | NHLH1     |
| 0.934548952 | stable | FLJ41649  |
| 0.934548952 | stable | OPRM1     |
| 0.934622872 | stable | GTF2I     |
| 0.934622872 | stable | LOC649366 |
| 0.934622872 | stable | C1ORF62   |
| 0.934622872 | stable | XRCC3     |

DEG.infomation

|             |        |               |
|-------------|--------|---------------|
| 0.934622872 | stable | IFNA13        |
| 0.934622872 | stable | LOC646780     |
| 0.934622872 | stable | KCNE2         |
| 0.934622872 | stable | PRSS2         |
| 0.934622872 | stable | MRPL22        |
| 0.934622872 | stable | OVOL2         |
| 0.934622872 | stable | LOC650454     |
| 0.934622872 | stable | MST1R         |
| 0.934622872 | stable | LOC647716     |
| 0.934622872 | stable | DKFZP686E2433 |
| 0.934622872 | stable | TMEM118       |
| 0.93468856  | stable | LOC643465     |
| 0.93479789  | stable | LOC641841     |
| 0.93479789  | stable | HOXC12        |
| 0.93479789  | stable | ACTN3         |
| 0.934820334 | stable | LOC643932     |
| 0.935000124 | stable | FOXJ3         |
| 0.935131434 | stable | LOC643368     |
| 0.935136881 | stable | ZKSCAN1       |
| 0.935136881 | stable | CDC16         |
| 0.935136881 | stable | LOC651680     |
| 0.935136881 | stable | EMID1         |
| 0.935136881 | stable | PHEX          |
| 0.935215725 | stable | LOC732387     |
| 0.935215725 | stable | KIAA1920      |
| 0.935215725 | stable | ARF6          |
| 0.935215725 | stable | LOC389405     |
| 0.935215725 | stable | LOC728080     |
| 0.935273602 | stable | SPINK4        |
| 0.935303247 | stable | WFDC9         |
| 0.935377716 | stable | LOC651513     |
| 0.935386747 | stable | LOC653429     |
| 0.935386747 | stable | FAM54A        |
| 0.935386747 | stable | LOC728216     |
| 0.935386747 | stable | LOC389396     |
| 0.935738894 | stable | PIGG          |
| 0.935774659 | stable | WAC           |
| 0.93577993  | stable | NYX           |
| 0.935809265 | stable | EDG7          |
| 0.936002155 | stable | LOC641958     |
| 0.936002155 | stable | NOVA2         |
| 0.93601365  | stable | B3GALNT2      |
| 0.93601365  | stable | GPR101        |
| 0.93601365  | stable | SYT12         |
| 0.93601365  | stable | LOC649500     |
| 0.93601365  | stable | RPL23A        |
| 0.93601365  | stable | SLC34A1       |
| 0.93601365  | stable | SNORD107      |
| 0.936017043 | stable | PSMB7         |
| 0.936145223 | stable | DNAJC17       |
| 0.936182621 | stable | OR1F1         |

## DEG.infomation

|             |        |           |
|-------------|--------|-----------|
| 0.936242919 | stable | LOC652554 |
| 0.936295338 | stable | EIF4EBP2  |
| 0.936443989 | stable | LOC652842 |
| 0.936443989 | stable | LOC390667 |
| 0.936443989 | stable | LOC158572 |
| 0.936443989 | stable | LOC647881 |
| 0.936443989 | stable | CUBN      |
| 0.936443989 | stable | MS4A12    |
| 0.936443989 | stable | COPG      |
| 0.936443989 | stable | ZNF639    |
| 0.936443989 | stable | FGF22     |
| 0.936443989 | stable | LOC650841 |
| 0.936443989 | stable | TAS2R42   |
| 0.936443989 | stable | LOC152742 |
| 0.93653825  | stable | PGF       |
| 0.93653825  | stable | LOC645446 |
| 0.936544563 | stable | MGC27165  |
| 0.936544563 | stable | C4ORF8    |
| 0.936544563 | stable | DEPDC1    |
| 0.936544563 | stable | ELAC1     |
| 0.936544563 | stable | LOC653293 |
| 0.936634271 | stable | LOC643409 |
| 0.936640534 | stable | SFTPA1    |
| 0.936640534 | stable | IMP5      |
| 0.936640534 | stable | CAMK1G    |
| 0.936640534 | stable | FOXD4L2   |
| 0.936764446 | stable | GPR119    |
| 0.936785281 | stable | HSFY1     |
| 0.936802667 | stable | LOC401589 |
| 0.936825145 | stable | FLJ35424  |
| 0.936853299 | stable | KRT85     |
| 0.936853299 | stable | LOC644288 |
| 0.936853299 | stable | TRDN      |
| 0.936853299 | stable | LOC645442 |
| 0.936984263 | stable | OTOP1     |
| 0.936984263 | stable | OR10A3    |
| 0.937011518 | stable | FLJ10120  |
| 0.937061658 | stable | CRYBB2    |
| 0.937066475 | stable | KPRP      |
| 0.937120236 | stable | LOC644246 |
| 0.937120236 | stable | UBA2      |
| 0.937120236 | stable | C19ORF15  |
| 0.937137152 | stable | PROP1     |
| 0.937196891 | stable | ST7OT4    |
| 0.937244132 | stable | LOC440422 |
| 0.937350875 | stable | SLC27A4   |
| 0.937350875 | stable | C21ORF114 |
| 0.937350875 | stable | LOC645167 |
| 0.937372375 | stable | PCDHGB8P  |
| 0.937372375 | stable | LOC653866 |
| 0.937373216 | stable | TOE1      |

DEG.infomation

|             |        |           |
|-------------|--------|-----------|
| 0.937377162 | stable | LOC645850 |
| 0.937659581 | stable | LOC642165 |
| 0.93791875  | stable | LOC653137 |
| 0.93791875  | stable | LOC651537 |
| 0.93791875  | stable | RYK       |
| 0.93791875  | stable | ACBD7     |
| 0.93791875  | stable | LOC644342 |
| 0.93791875  | stable | ACTL7B    |
| 0.937951858 | stable | LOC652840 |
| 0.938018508 | stable | C14ORF162 |
| 0.938019397 | stable | LOC441662 |
| 0.938195348 | stable | USP37     |
| 0.938250492 | stable | LOC644943 |
| 0.938379726 | stable | LOC653796 |
| 0.938379726 | stable | LOC650687 |
| 0.938379726 | stable | LOC339766 |
| 0.938379726 | stable | EPHA10    |
| 0.938379726 | stable | AHCYL1    |
| 0.938379726 | stable | DHX38     |
| 0.93850443  | stable | LOC652544 |
| 0.93850443  | stable | UQCRC1    |
| 0.93850443  | stable | SLC25A37  |
| 0.93850443  | stable | PHACS     |
| 0.93850443  | stable | LOC284379 |
| 0.93850443  | stable | C15ORF39  |
| 0.93850443  | stable | LOC391703 |
| 0.93850443  | stable | ATP6V1C2  |
| 0.93850443  | stable | STEAP2    |
| 0.93850443  | stable | FDPSL2A   |
| 0.938515503 | stable | CDH18     |
| 0.938771674 | stable | HTR1A     |
| 0.939060638 | stable | LOC642377 |
| 0.939060638 | stable | LOC647123 |
| 0.939060638 | stable | CAPSL     |
| 0.939060638 | stable | CBX8      |
| 0.939060638 | stable | BANF2     |
| 0.939060638 | stable | INTS5     |
| 0.939071907 | stable | TP53BP1   |
| 0.939071907 | stable | ALLC      |
| 0.939125817 | stable | OR52J3    |
| 0.939125817 | stable | LOC392979 |
| 0.939125817 | stable | DDX3Y     |
| 0.939135262 | stable | LOC654046 |
| 0.939152197 | stable | FMO1      |
| 0.939152197 | stable | SPTBN4    |
| 0.939212871 | stable | OR10G2    |
| 0.939212871 | stable | GEFT      |
| 0.939939577 | stable | DNTTIP2   |
| 0.939985502 | stable | LPHN2     |
| 0.939985502 | stable | LOC654078 |
| 0.939985502 | stable | FAM35A    |

## DEG.infomation

|             |        |           |
|-------------|--------|-----------|
| 0.939985502 | stable | SHANK2    |
| 0.939994198 | stable | HOXB9     |
| 0.939994198 | stable | ZFPM1     |
| 0.940089436 | stable | LOC732300 |
| 0.940089436 | stable | CHI3L1    |
| 0.940262047 | stable | LOC649429 |
| 0.940283391 | stable | LOC340529 |
| 0.940283391 | stable | KRTAP9-4  |
| 0.940283391 | stable | FAM159A   |
| 0.940283391 | stable | LOC650103 |
| 0.940283391 | stable | DBX2      |
| 0.940328664 | stable | LOC653981 |
| 0.940488509 | stable | PPP5C     |
| 0.940811296 | stable | ATP5B     |
| 0.94085756  | stable | LOC653569 |
| 0.940966577 | stable | TEKT1     |
| 0.940966577 | stable | KIAA1967  |
| 0.940982217 | stable | CCDC135   |
| 0.941106205 | stable | DUS2L     |
| 0.9411096   | stable | CXCL14    |
| 0.94113471  | stable | LOC650024 |
| 0.941296708 | stable | LOC651177 |
| 0.941333766 | stable | RNF168    |
| 0.941447606 | stable | CLCA1     |
| 0.941510079 | stable | LOC652587 |
| 0.941588708 | stable | OR9K2     |
| 0.941617995 | stable | LBP       |
| 0.941659953 | stable | LOC651453 |
| 0.941783159 | stable | PSMG1     |
| 0.941783159 | stable | LRRRC37A2 |
| 0.941783159 | stable | KCNE1L    |
| 0.941787531 | stable | LOC647683 |
| 0.941844466 | stable | ISL2      |
| 0.941908489 | stable | LOC729692 |
| 0.941908489 | stable | KLHDC7A   |
| 0.94191241  | stable | LOC651116 |
| 0.941966965 | stable | COPB1     |
| 0.941966965 | stable | PAR6G     |
| 0.942042173 | stable | LOC645876 |
| 0.942131205 | stable | LYZL6     |
| 0.942276288 | stable | LOC649120 |
| 0.942362445 | stable | NAV3      |
| 0.942362445 | stable | SYT6      |
| 0.942362445 | stable | GRHL3     |
| 0.942362445 | stable | ABHD7     |
| 0.942362445 | stable | DLC1      |
| 0.942362445 | stable | LOC653140 |
| 0.942362445 | stable | LOC652755 |
| 0.942362445 | stable | LRFN4     |
| 0.942392578 | stable | LOC651403 |
| 0.942406751 | stable | TTC9B     |



## DEG.infomation

|             |        |           |
|-------------|--------|-----------|
| 0.942406751 | stable | LOC647074 |
| 0.942434663 | stable | CD80      |
| 0.942495773 | stable | LOC400099 |
| 0.942567515 | stable | LOC652859 |
| 0.942694935 | stable | LOC652519 |
| 0.942694935 | stable | LMF1      |
| 0.942694935 | stable | LOC644472 |
| 0.942825679 | stable | DUB3      |
| 0.942932472 | stable | LOC646638 |
| 0.943003613 | stable | LOC647624 |
| 0.943232285 | stable | HNF4G     |
| 0.943238262 | stable | PNMA5     |
| 0.943238262 | stable | LOC728626 |
| 0.943238262 | stable | EYA4      |
| 0.943238262 | stable | HIST1H3C  |
| 0.943238262 | stable | LOC643731 |
| 0.943238262 | stable | LOC647243 |
| 0.943377122 | stable | UGT1A3    |
| 0.943414249 | stable | LOC649137 |
| 0.943414249 | stable | LOC391742 |
| 0.943425847 | stable | CYP2D7P1  |
| 0.943468748 | stable | LOC642005 |
| 0.943481793 | stable | LOC220594 |
| 0.943481793 | stable | C10ORF85  |
| 0.943507388 | stable | LOC642011 |
| 0.943565802 | stable | MGC16121  |
| 0.943565802 | stable | LOC441752 |
| 0.943761357 | stable | OR6T1     |
| 0.943778981 | stable | FAM125B   |
| 0.943778981 | stable | LOC652734 |
| 0.943778981 | stable | LOC648354 |
| 0.943778981 | stable | LOC642164 |
| 0.943778981 | stable | TEX14     |
| 0.943778981 | stable | CBFA2T3   |
| 0.943784547 | stable | LOC650520 |
| 0.943784547 | stable | MAGEA1    |
| 0.943806129 | stable | LOC644641 |
| 0.943887956 | stable | LOC650656 |
| 0.943993948 | stable | LOC645410 |
| 0.943993948 | stable | TM4SF4    |
| 0.944015543 | stable | ITM2B     |
| 0.944137294 | stable | AP4E1     |
| 0.944137294 | stable | FAAH      |
| 0.944173661 | stable | SIGLEC6   |
| 0.944173661 | stable | LOC649182 |
| 0.944181858 | stable | LOC652003 |
| 0.944181858 | stable | FLJ45139  |
| 0.944212455 | stable | IL27      |
| 0.944212455 | stable | FLJ45032  |
| 0.944212455 | stable | LOC643062 |
| 0.944212455 | stable | LILRA1    |

## DEG.infomation

|             |        |           |
|-------------|--------|-----------|
| 0.944212455 | stable | FLJ22447  |
| 0.944212455 | stable | RAB31     |
| 0.944212455 | stable | KIAA1274  |
| 0.944212455 | stable | LOC652436 |
| 0.94427499  | stable | DGKE      |
| 0.94427499  | stable | CLDN10    |
| 0.94427499  | stable | FAM111A   |
| 0.944291836 | stable | CREBL2    |
| 0.944291836 | stable | UNC93A    |
| 0.94432383  | stable | RUTBC2    |
| 0.944338307 | stable | LOC644929 |
| 0.944387805 | stable | LOC649201 |
| 0.944439922 | stable | CNKSR2    |
| 0.944465645 | stable | CACNA1A   |
| 0.944465645 | stable | LOC650074 |
| 0.944465645 | stable | PSMC2     |
| 0.944465645 | stable | LOC642672 |
| 0.944465645 | stable | LOC651520 |
| 0.944465645 | stable | MOS       |
| 0.944754592 | stable | LOC648058 |
| 0.944767059 | stable | LOC732157 |
| 0.944866148 | stable | LOC388692 |
| 0.944866148 | stable | LOC644489 |
| 0.944866148 | stable | RNF186    |
| 0.944866148 | stable | UPF1      |
| 0.944974813 | stable | NY-REN-7  |
| 0.944974813 | stable | TEAD3     |
| 0.944974813 | stable | PA2G4P4   |
| 0.944974813 | stable | DDX25     |
| 0.944974813 | stable | LOC400509 |
| 0.945007032 | stable | ZNF273    |
| 0.945035162 | stable | GPD2      |
| 0.945225943 | stable | EPHB6     |
| 0.945231955 | stable | LOC643767 |
| 0.945231955 | stable | OR2AK2    |
| 0.945258879 | stable | AMPD2     |
| 0.9453592   | stable | DSC3      |
| 0.945382341 | stable | LOC643501 |
| 0.94539225  | stable | OR10T2    |
| 0.945471503 | stable | NR1D1     |
| 0.945488562 | stable | USPL1     |
| 0.945531526 | stable | LOC650889 |
| 0.945640347 | stable | FLJ10404  |
| 0.945640347 | stable | LOC401399 |
| 0.945640347 | stable | LOC653711 |
| 0.945640347 | stable | LOC729252 |
| 0.945640347 | stable | LOC643857 |
| 0.945640347 | stable | LOC653665 |
| 0.945640347 | stable | C7ORF60   |
| 0.945640347 | stable | NBL1      |
| 0.945640347 | stable | ITFG3     |

DEG.infomation

|             |        |           |
|-------------|--------|-----------|
| 0.945640347 | stable | WIPF2     |
| 0.945644234 | stable | AQP3      |
| 0.945662541 | stable | TNIP3     |
| 0.945662541 | stable | C20ORF144 |
| 0.945685347 | stable | PRH1      |
| 0.945703181 | stable | LOC653148 |
| 0.945703181 | stable | CACNB1    |
| 0.945703181 | stable | LOC652657 |
| 0.945703181 | stable | RGS12     |
| 0.945703181 | stable | C18ORF24  |
| 0.945703181 | stable | RPS24     |
| 0.945703181 | stable | LOC644444 |
| 0.945703181 | stable | LOC652215 |
| 0.945725596 | stable | LOC641724 |
| 0.945793681 | stable | ZNF282    |
| 0.945835429 | stable | FUT1      |
| 0.945835429 | stable | HOXA3     |
| 0.945835429 | stable | LOC644567 |
| 0.94601018  | stable | CCDC140   |
| 0.94601018  | stable | PBX3      |
| 0.946019829 | stable | OR4Q3     |
| 0.946019829 | stable | LOC644512 |
| 0.946117993 | stable | LOC642691 |
| 0.946147665 | stable | WNT3A     |
| 0.946152376 | stable | LOC541469 |
| 0.946152376 | stable | IFNA7     |
| 0.946152376 | stable | FLJ44635  |
| 0.946152376 | stable | USP50     |
| 0.946256716 | stable | ZFYVE19   |
| 0.946256716 | stable | LOC284100 |
| 0.946256716 | stable | CPSF3L    |
| 0.946256716 | stable | RBPJL     |
| 0.946256716 | stable | ZNF600    |
| 0.946405683 | stable | LOC122038 |
| 0.946405683 | stable | STMN2     |
| 0.946405683 | stable | LOC440258 |
| 0.946431019 | stable | CABP2     |
| 0.946495865 | stable | LOC651610 |
| 0.94662828  | stable | MKLN1     |
| 0.946750755 | stable | LOC653930 |
| 0.946785574 | stable | KLK3      |
| 0.946910021 | stable | LOC642248 |
| 0.947049289 | stable | LOC645492 |
| 0.947049289 | stable | LOC649501 |
| 0.947058106 | stable | P53AIP1   |
| 0.947086329 | stable | GALNT14   |
| 0.947086329 | stable | LOC341356 |
| 0.947086329 | stable | SDC3      |
| 0.94709079  | stable | FSTL3     |
| 0.947228933 | stable | MAPK15    |
| 0.947228933 | stable | CD180     |

## DEG.infomation

|             |        |           |
|-------------|--------|-----------|
| 0.947228933 | stable | GM127     |
| 0.947228933 | stable | LOC647810 |
| 0.947228933 | stable | LOC728181 |
| 0.947230801 | stable | ZNF678    |
| 0.947231482 | stable | TRPV3     |
| 0.947231482 | stable | FAM22C    |
| 0.947231482 | stable | LOC643234 |
| 0.947231482 | stable | FLJ42280  |
| 0.947422143 | stable | LOC149620 |
| 0.947422143 | stable | DCDC2B    |
| 0.947422143 | stable | MRPL30    |
| 0.947422143 | stable | CDCA5     |
| 0.947422143 | stable | KCNK2     |
| 0.947422143 | stable | FLJ30430  |
| 0.947422143 | stable | SPC25     |
| 0.947422143 | stable | CDCA1     |
| 0.947422143 | stable | LOC645565 |
| 0.947422143 | stable | LOC643296 |
| 0.947422143 | stable | BARD1     |
| 0.947422143 | stable | LOC643648 |
| 0.947422143 | stable | ABCG8     |
| 0.947422143 | stable | OR8H2     |
| 0.947473499 | stable | FLJ20397  |
| 0.947498351 | stable | EGFL8     |
| 0.947498351 | stable | IHPK2     |
| 0.947498351 | stable | C9ORF89   |
| 0.947522555 | stable | SNORD73A  |
| 0.947522555 | stable | POU2AF1   |
| 0.947522555 | stable | LOC651830 |
| 0.947522555 | stable | LOC647647 |
| 0.947522555 | stable | CMTM1     |
| 0.947522555 | stable | LOC646193 |
| 0.947522555 | stable | LOC340204 |
| 0.947630806 | stable | TMEM169   |
| 0.947659073 | stable | LOC641983 |
| 0.947659073 | stable | C9ORF38   |
| 0.947659073 | stable | ZNF485    |
| 0.947659073 | stable | CHRD1     |
| 0.947659073 | stable | LOC163233 |
| 0.947659073 | stable | TLR7      |
| 0.947738572 | stable | LOC653431 |
| 0.947748436 | stable | ZNF496    |
| 0.947748436 | stable | LOC646209 |
| 0.947748436 | stable | ATG2B     |
| 0.947756998 | stable | C2ORF83   |
| 0.947767274 | stable | GRID1     |
| 0.947810868 | stable | KIAA1755  |
| 0.947819204 | stable | LOC644599 |
| 0.947959987 | stable | LOC653720 |
| 0.947959987 | stable | LOC652335 |
| 0.947959987 | stable | BRI3      |

## DEG.infomation

|             |        |           |
|-------------|--------|-----------|
| 0.947976837 | stable | LIN7A     |
| 0.948154599 | stable | BTBD16    |
| 0.948154599 | stable | LOC402457 |
| 0.948154599 | stable | BRUNOL4   |
| 0.948154599 | stable | P2RY12    |
| 0.948154599 | stable | CRTAP     |
| 0.948154599 | stable | PIPOX     |
| 0.948194534 | stable | LOC650187 |
| 0.948282559 | stable | LOC729096 |
| 0.948380056 | stable | IFIT3     |
| 0.948561682 | stable | LOC642936 |
| 0.948561682 | stable | C19ORF46  |
| 0.948617344 | stable | LOC643640 |
| 0.948617344 | stable | GPR109A   |
| 0.948617344 | stable | LOC641943 |
| 0.94866838  | stable | LOC642255 |
| 0.94866838  | stable | TMEM16J   |
| 0.948872894 | stable | PHLDA3    |
| 0.948872894 | stable | SEBOX     |
| 0.948872894 | stable | FUT10     |
| 0.948872894 | stable | LOC728369 |
| 0.948872894 | stable | LOC149069 |
| 0.948872894 | stable | CSMD3     |
| 0.948872894 | stable | HSP90AB2P |
| 0.948940755 | stable | LOC390748 |
| 0.948947542 | stable | OR8D1     |
| 0.948947542 | stable | DSCR4     |
| 0.948947542 | stable | FUT2      |
| 0.948947542 | stable | LOC652173 |
| 0.948947542 | stable | WASPIP    |
| 0.948947542 | stable | GAPDH     |
| 0.948968453 | stable | ATP6V0D2  |
| 0.948968453 | stable | CFHR1     |
| 0.949013176 | stable | LOC653043 |
| 0.949013176 | stable | LOC728185 |
| 0.949013176 | stable | LOC647788 |
| 0.949013176 | stable | LOC653192 |
| 0.94906477  | stable | LOC283029 |
| 0.949129104 | stable | LOC651166 |
| 0.949129104 | stable | MMRN1     |
| 0.949198824 | stable | CREBL1    |
| 0.949199731 | stable | SYNCRIP   |
| 0.949199731 | stable | WDR42C    |
| 0.949199831 | stable | WDR76     |
| 0.94930197  | stable | DIRC2     |
| 0.94982738  | stable | LOC646853 |
| 0.949871852 | stable | RRAGA     |
| 0.949880161 | stable | HMGA2     |
| 0.949880161 | stable | CTNS      |
| 0.950026479 | stable | LOC652877 |
| 0.950217567 | stable | FAM91A2   |

DEG.infomation

|             |        |           |
|-------------|--------|-----------|
| 0.950217567 | stable | FAM12A    |
| 0.950217567 | stable | CCNK      |
| 0.950217567 | stable | SNAI3     |
| 0.950217567 | stable | FBXW10    |
| 0.950217567 | stable | NKAIN1    |
| 0.950217567 | stable | SOX30     |
| 0.950217567 | stable | SIDT2     |
| 0.950217567 | stable | GABRA2    |
| 0.950249198 | stable | C21ORF49  |
| 0.950332278 | stable | STAC      |
| 0.950401012 | stable | RHBDD2    |
| 0.950401012 | stable | RBM12     |
| 0.950401012 | stable | PAX9      |
| 0.950401012 | stable | LOC653686 |
| 0.950401012 | stable | SPINT1    |
| 0.950401012 | stable | PSMD11    |
| 0.950496464 | stable | BPIL1     |
| 0.950496464 | stable | OAS2      |
| 0.950496464 | stable | ABCA12    |
| 0.950496464 | stable | LOC651189 |
| 0.950496464 | stable | LOC389722 |
| 0.950496464 | stable | LOC645986 |
| 0.950496464 | stable | INSL6     |
| 0.950496464 | stable | CCDC61    |
| 0.950496464 | stable | RFPL2     |
| 0.950496464 | stable | LOC646331 |
| 0.950512364 | stable | FAM152A   |
| 0.950512364 | stable | LOC650087 |
| 0.950512364 | stable | PGBD1     |
| 0.950512364 | stable | ACCN3     |
| 0.950512364 | stable | LOC650977 |
| 0.950512364 | stable | FAM9B     |
| 0.950512364 | stable | LOC645468 |
| 0.950512364 | stable | LOC646050 |
| 0.950512364 | stable | LOC645464 |
| 0.950512364 | stable | OR52A4    |
| 0.950550461 | stable | LOC645687 |
| 0.950870836 | stable | LOC652655 |
| 0.950929339 | stable | ZFYVE9    |
| 0.950929339 | stable | LOC642214 |
| 0.950980348 | stable | LOC340260 |
| 0.951016729 | stable | LOC643712 |
| 0.951082725 | stable | OR1B1     |
| 0.951082725 | stable | SUSD5     |
| 0.951082725 | stable | LOC642553 |
| 0.951082725 | stable | LOC651907 |
| 0.951082725 | stable | LOC649432 |
| 0.951082725 | stable | LOC642244 |
| 0.951108413 | stable | FLVCR1    |
| 0.951108413 | stable | LOC401845 |
| 0.951108413 | stable | LOC732393 |

## DEG.infomation

|             |        |                 |
|-------------|--------|-----------------|
| 0.951108413 | stable | TINAGL1         |
| 0.951108413 | stable | DYNLRB2         |
| 0.951108413 | stable | B4GALNT3        |
| 0.951108413 | stable | TTY16           |
| 0.951108413 | stable | ADCY6           |
| 0.951108413 | stable | LOC652101       |
| 0.951108413 | stable | SIRPB2          |
| 0.951108413 | stable | VSTM1           |
| 0.951108413 | stable | ESSPL           |
| 0.951108413 | stable | LOC728343       |
| 0.951286896 | stable | ANKHD1-EIF4EBP3 |
| 0.951286896 | stable | C9ORF128        |
| 0.951286896 | stable | POU4F1          |
| 0.951286896 | stable | ADAMTS2         |
| 0.951286896 | stable | MED12L          |
| 0.951286896 | stable | PRDX5           |
| 0.951286896 | stable | LOC401387       |
| 0.951286896 | stable | ANGPT4          |
| 0.951435446 | stable | LOC653464       |
| 0.951436283 | stable | LOC646178       |
| 0.951464889 | stable | CTSW            |
| 0.951523254 | stable | MS4A5           |
| 0.951523254 | stable | SLC7A13         |
| 0.951523254 | stable | TAS1R2          |
| 0.951523254 | stable | LOC646146       |
| 0.951523254 | stable | FLJ20850        |
| 0.951523254 | stable | CNGA4           |
| 0.951523254 | stable | LOC121006       |
| 0.951523254 | stable | LOC652733       |
| 0.951523254 | stable | AP1S3           |
| 0.951523254 | stable | MYH2            |
| 0.951599123 | stable | MBNL1           |
| 0.951599123 | stable | LIN7C           |
| 0.951751511 | stable | LOC647862       |
| 0.951751511 | stable | MAS1            |
| 0.951912192 | stable | LOC643968       |
| 0.951943869 | stable | NLN             |
| 0.952049405 | stable | LOC286177       |
| 0.952148536 | stable | MAGEB2          |
| 0.952213485 | stable | RPGRIP1L        |
| 0.952274432 | stable | LOC645203       |
| 0.952274432 | stable | HIST1H1T        |
| 0.952291454 | stable | LOC651100       |
| 0.952291454 | stable | PLEKHG6         |
| 0.952355308 | stable | LOC652629       |
| 0.952505197 | stable | CDC25C          |
| 0.952517265 | stable | ARHGAP22        |
| 0.952704502 | stable | OR2T33          |
| 0.952704502 | stable | LOC649470       |
| 0.952704502 | stable | PPL             |
| 0.952704502 | stable | GDA             |

## DEG.infomation

|             |        |           |
|-------------|--------|-----------|
| 0.952793096 | stable | UNQ9438   |
| 0.952793096 | stable | ASB2      |
| 0.952793096 | stable | LOC652258 |
| 0.952793096 | stable | KRTAP5-1  |
| 0.95280831  | stable | LOC729351 |
| 0.952866346 | stable | HAPLN4    |
| 0.952891996 | stable | TCP10     |
| 0.952891996 | stable | DNA2      |
| 0.952891996 | stable | LOC652625 |
| 0.952891996 | stable | PRKD3     |
| 0.952891996 | stable | KIAA0409  |
| 0.952891996 | stable | LOC729162 |
| 0.952913176 | stable | MCTP2     |
| 0.952913176 | stable | LOC648672 |
| 0.95293672  | stable | ACR       |
| 0.953061976 | stable | LOC648815 |
| 0.953061976 | stable | LOC374443 |
| 0.953061976 | stable | SRC       |
| 0.953061976 | stable | ZMYM6     |
| 0.953077152 | stable | NHSL2     |
| 0.953169518 | stable | H6PD      |
| 0.953258768 | stable | FABP5L3   |
| 0.953258768 | stable | DDX43     |
| 0.953570186 | stable | LOC342541 |
| 0.953612642 | stable | CDH26     |
| 0.953775797 | stable | FLJ46906  |
| 0.953775797 | stable | UBE2G2    |
| 0.953779715 | stable | C4ORF15   |
| 0.953779715 | stable | LOC650744 |
| 0.953782714 | stable | NAT8B     |
| 0.953815375 | stable | SLC25A41  |
| 0.953815375 | stable | TARP      |
| 0.953815375 | stable | GABRG2    |
| 0.953815375 | stable | PRKCABP   |
| 0.953815375 | stable | LOC647082 |
| 0.953858303 | stable | GUCA2A    |
| 0.953898342 | stable | LOC644055 |
| 0.953927683 | stable | PPP2R4    |
| 0.953974696 | stable | GEMIN4    |
| 0.953976635 | stable | YTHDC2    |
| 0.953976635 | stable | HRH3      |
| 0.953976635 | stable | MAFA      |
| 0.953976635 | stable | LOC643566 |
| 0.953976635 | stable | GRM7      |
| 0.953976635 | stable | LOC642976 |
| 0.953976635 | stable | MBD3L1    |
| 0.953976635 | stable | GNGT1     |
| 0.953976635 | stable | LOC642009 |
| 0.953976635 | stable | SNX24     |
| 0.954027271 | stable | ATP8A1    |
| 0.954027271 | stable | PLCB3     |



## DEG.infomation

|             |        |           |
|-------------|--------|-----------|
| 0.954030219 | stable | LOC285453 |
| 0.954030219 | stable | HSP90B3P  |
| 0.954030219 | stable | KIAA1787  |
| 0.954030219 | stable | ZDHHC22   |
| 0.954030219 | stable | FLJ40243  |
| 0.954030219 | stable | LOC642269 |
| 0.954153356 | stable | PIH1D1    |
| 0.954280524 | stable | LOC442403 |
| 0.954280524 | stable | BBOX1     |
| 0.954310303 | stable | LOC652684 |
| 0.954310303 | stable | SULT6B1   |
| 0.954310303 | stable | LOC441005 |
| 0.954378598 | stable | ZNF318    |
| 0.954378598 | stable | LOC645961 |
| 0.95441239  | stable | KIF27     |
| 0.954553662 | stable | GPR176    |
| 0.954615804 | stable | IL19      |
| 0.954615804 | stable | ZNF782    |
| 0.954615804 | stable | PHOX2B    |
| 0.954690971 | stable | LOC348174 |
| 0.95473557  | stable | LOC653184 |
| 0.954796176 | stable | VSIG6     |
| 0.954803075 | stable | AGBL2     |
| 0.954803075 | stable | FLJ46257  |
| 0.954803075 | stable | ZNF707    |
| 0.954834392 | stable | LOC441424 |
| 0.954900777 | stable | LOC647753 |
| 0.95490698  | stable | CBL       |
| 0.95490698  | stable | TMEM40    |
| 0.954950938 | stable | ZNF560    |
| 0.954950938 | stable | LOC653587 |
| 0.954950938 | stable | LOC283514 |
| 0.954950938 | stable | RASA3     |
| 0.954950938 | stable | OR5V1     |
| 0.954963035 | stable | LOC645558 |
| 0.955058247 | stable | MTTP      |
| 0.955069796 | stable | ZBTB40    |
| 0.955069796 | stable | CT45-2    |
| 0.955069796 | stable | LOC648612 |
| 0.955069796 | stable | OR2J2     |
| 0.955084227 | stable | LOC649279 |
| 0.955132022 | stable | SLC17A3   |
| 0.955142197 | stable | LOC653160 |
| 0.95523646  | stable | CD151     |
| 0.955243877 | stable | LOC642622 |
| 0.955243877 | stable | RUFY4     |
| 0.955321499 | stable | PLG       |
| 0.955363613 | stable | MYO18B    |
| 0.955364431 | stable | KIAA1245  |
| 0.955448989 | stable | LOC728637 |
| 0.955448989 | stable | FAM71F1   |

## DEG.infomation

|             |        |           |
|-------------|--------|-----------|
| 0.955448989 | stable | KISS1     |
| 0.955448989 | stable | LOC643274 |
| 0.955530185 | stable | FAM128B   |
| 0.955530185 | stable | OR51G2    |
| 0.955530185 | stable | OR2G2     |
| 0.955530185 | stable | KIAA0319  |
| 0.955530185 | stable | TMEM173   |
| 0.955530185 | stable | OR4N4     |
| 0.955530185 | stable | OR2A7     |
| 0.955530185 | stable | NEUROG3   |
| 0.955588254 | stable | OR2L8     |
| 0.955588254 | stable | LOC643386 |
| 0.955591958 | stable | FLJ25770  |
| 0.955591958 | stable | BARHL2    |
| 0.955591958 | stable | LOC440389 |
| 0.955591958 | stable | CYP2B6    |
| 0.955665976 | stable | LOC441320 |
| 0.955713917 | stable | PDILT     |
| 0.955713917 | stable | C6ORF182  |
| 0.955713917 | stable | FAM120A   |
| 0.955713917 | stable | FLJ45121  |
| 0.955713917 | stable | AMN       |
| 0.955713917 | stable | ULK3      |
| 0.955713917 | stable | LOC650174 |
| 0.955713917 | stable | SYCP2     |
| 0.955713917 | stable | LOC649745 |
| 0.955713917 | stable | LOC654055 |
| 0.955824635 | stable | LOC389043 |
| 0.955859966 | stable | XKR5      |
| 0.955859966 | stable | LOC401358 |
| 0.956065879 | stable | FOXD4     |
| 0.956065879 | stable | LOC651131 |
| 0.956136282 | stable | LOC651961 |
| 0.95614022  | stable | LOC652887 |
| 0.95614022  | stable | LOC650739 |
| 0.95614022  | stable | LOC649701 |
| 0.956182698 | stable | PRR10     |
| 0.956192841 | stable | LOC649897 |
| 0.956192841 | stable | LOC645870 |
| 0.956205184 | stable | CLIC2     |
| 0.956205184 | stable | LYAR      |
| 0.956334487 | stable | GTPBP5    |
| 0.956353333 | stable | LOC390760 |
| 0.956503507 | stable | C11ORF37  |
| 0.956538664 | stable | C9ORF41   |
| 0.956538664 | stable | MDH1B     |
| 0.956538664 | stable | ZC3HAV1L  |
| 0.956538664 | stable | LOC653541 |
| 0.956538664 | stable | PHYHIP    |
| 0.956538664 | stable | STAT4     |
| 0.956538664 | stable | FOLH1     |

DEG.infomation

|             |        |               |
|-------------|--------|---------------|
| 0.956538664 | stable | PGDS          |
| 0.956538664 | stable | CD3D          |
| 0.956576567 | stable | DKFZP667M2411 |
| 0.956655289 | stable | FAM41C        |
| 0.956775983 | stable | ZNF708        |
| 0.956775983 | stable | TMEM201       |
| 0.956775983 | stable | RBP2          |
| 0.956775983 | stable | LOC340527     |
| 0.956775983 | stable | STAB2         |
| 0.95678693  | stable | TMEM181       |
| 0.95678693  | stable | LOC641939     |
| 0.95678693  | stable | LOC389633     |
| 0.95678693  | stable | LOC388938     |
| 0.95678693  | stable | THRБ          |
| 0.95678693  | stable | LOC388397     |
| 0.95678693  | stable | NDUFA10       |
| 0.95678693  | stable | LOC649707     |
| 0.95678693  | stable | CENPH         |
| 0.95678693  | stable | PSMD7         |
| 0.956812373 | stable | LOC391555     |
| 0.956812373 | stable | CT45-5        |
| 0.956812373 | stable | ALKBH4        |
| 0.95702071  | stable | LOC643009     |
| 0.95702071  | stable | TBC1D10C      |
| 0.957077053 | stable | TRAP1         |
| 0.95707939  | stable | LOC649584     |
| 0.957123438 | stable | LOC283951     |
| 0.957123438 | stable | ECH1          |
| 0.957362651 | stable | CNTNAP4       |
| 0.957362651 | stable | LOC389000     |
| 0.957362651 | stable | LOC642516     |
| 0.957362651 | stable | TTY2          |
| 0.957421804 | stable | DGAT2L4       |
| 0.957421804 | stable | S100Z         |
| 0.957648918 | stable | EXOC8         |
| 0.957677202 | stable | AKAP4         |
| 0.957856041 | stable | F11           |
| 0.957887354 | stable | LOC440402     |
| 0.957891372 | stable | FLJ35894      |
| 0.958048141 | stable | KCNH5         |
| 0.958101591 | stable | ZNF79         |
| 0.958101591 | stable | IKZF3         |
| 0.958101591 | stable | A3GALT2       |
| 0.958101591 | stable | LOC388114     |
| 0.958101591 | stable | DHX57         |
| 0.958123433 | stable | C20ORF179     |
| 0.958247948 | stable | SELP          |
| 0.958271588 | stable | TMEM167A      |
| 0.958405347 | stable | LOC651400     |
| 0.958445015 | stable | KRT18         |
| 0.95846465  | stable | RCSD1         |

DEG.infomation

|             |        |           |
|-------------|--------|-----------|
| 0.958728186 | stable | TMEM185B  |
| 0.958728186 | stable | LOC646046 |
| 0.958924702 | stable | LOC645418 |
| 0.95900421  | stable | FLJ35767  |
| 0.959123147 | stable | KIAA0182  |
| 0.959227589 | stable | TLR9      |
| 0.959227589 | stable | FLJ22184  |
| 0.959227589 | stable | MSGN1     |
| 0.959227589 | stable | OR8D4     |
| 0.959246267 | stable | MAGEE2    |
| 0.959304618 | stable | LOC644824 |
| 0.959355348 | stable | KCNJ1     |
| 0.959365462 | stable | LOC728670 |
| 0.959406285 | stable | UCHL5     |
| 0.959456522 | stable | LOC643493 |
| 0.959489164 | stable | XIAP      |
| 0.959495103 | stable | HS3ST1    |
| 0.959512305 | stable | MORC1     |
| 0.95953885  | stable | LOC642243 |
| 0.95953885  | stable | SEC63     |
| 0.959543956 | stable | CA10      |
| 0.959566046 | stable | DAGLA     |
| 0.959566046 | stable | LOC652811 |
| 0.959741982 | stable | HAND1     |
| 0.959852744 | stable | COG5      |
| 0.959852744 | stable | LOC645733 |
| 0.960007066 | stable | P2RY13    |
| 0.960007066 | stable | LOC643807 |
| 0.960007066 | stable | FXD3      |
| 0.960007066 | stable | LOC649415 |
| 0.960049153 | stable | FBXO47    |
| 0.960049153 | stable | GTF3C5    |
| 0.960079869 | stable | LOC651900 |
| 0.960079869 | stable | LOC644093 |
| 0.96011717  | stable | SNORD15B  |
| 0.960131703 | stable | LOC727737 |
| 0.960131703 | stable | LOC388931 |
| 0.960196434 | stable | LOC644386 |
| 0.96023015  | stable | FLJ32011  |
| 0.96023015  | stable | CCDC116   |
| 0.960402931 | stable | C14ORF148 |
| 0.960402931 | stable | LOC645557 |
| 0.960551037 | stable | PJCG6     |
| 0.960551037 | stable | LOC646703 |
| 0.960581952 | stable | OR5H14    |
| 0.960581952 | stable | LOC652252 |
| 0.960581952 | stable | LOC651568 |
| 0.960626159 | stable | RNASE7    |
| 0.960637253 | stable | LOC649979 |
| 0.960671151 | stable | TTC15     |
| 0.960728176 | stable | LOC647102 |

DEG.infomation

|             |        |           |
|-------------|--------|-----------|
| 0.960728176 | stable | C6ORF167  |
| 0.960728176 | stable | RIBC1     |
| 0.960728176 | stable | LOC653113 |
| 0.960728176 | stable | EPHB1     |
| 0.960728176 | stable | LOC642276 |
| 0.960780393 | stable | NPCDR1    |
| 0.96079919  | stable | PCDH11Y   |
| 0.96079919  | stable | LOC642571 |
| 0.960803977 | stable | PNPLA3    |
| 0.960910158 | stable | KIAA1841  |
| 0.96098515  | stable | OR52L1    |
| 0.96098515  | stable | C11ORF59  |
| 0.96098515  | stable | LOC649652 |
| 0.961011465 | stable | LOC645942 |
| 0.961011465 | stable | LOC652646 |
| 0.961011465 | stable | PHF20     |
| 0.961011465 | stable | LOC647654 |
| 0.961036222 | stable | FAM175B   |
| 0.961036222 | stable | GALP      |
| 0.961063466 | stable | LOC653486 |
| 0.961190977 | stable | FGG       |
| 0.961190977 | stable | REXO1L1   |
| 0.961268071 | stable | LOC402643 |
| 0.961292985 | stable | DNHD2     |
| 0.961292985 | stable | GOLT1A    |
| 0.961292985 | stable | GPX6      |
| 0.961319894 | stable | IL1F10    |
| 0.961319894 | stable | LOC649371 |
| 0.961358074 | stable | LOC729444 |
| 0.961359005 | stable | BCYRN1    |
| 0.961359005 | stable | SERF2     |
| 0.961559582 | stable | DDX6      |
| 0.961559582 | stable | SLC28A3   |
| 0.961559582 | stable | ABLIM2    |
| 0.961559582 | stable | LOC647558 |
| 0.961559582 | stable | LAX1      |
| 0.961559582 | stable | DDT       |
| 0.961559582 | stable | LOC654222 |
| 0.961574382 | stable | C8ORF79   |
| 0.961646591 | stable | LOC442517 |
| 0.961684076 | stable | LOC120364 |
| 0.961856144 | stable | NKX2-1    |
| 0.961878971 | stable | OR4M1     |
| 0.961878971 | stable | LOC441436 |
| 0.961878971 | stable | FBXO42    |
| 0.961907954 | stable | POMT2     |
| 0.961907954 | stable | TMEM132D  |
| 0.961907954 | stable | RERG      |
| 0.96200347  | stable | FLJ40194  |
| 0.96200347  | stable | GABRR2    |
| 0.96200347  | stable | UBE2D4    |

DEG.infomation

|             |        |           |
|-------------|--------|-----------|
| 0.96208162  | stable | KLK10     |
| 0.96208162  | stable | LOC392713 |
| 0.962236009 | stable | GPHA2     |
| 0.962293622 | stable | SURF2     |
| 0.962293622 | stable | C4BPA     |
| 0.962293622 | stable | OVCA2     |
| 0.962374947 | stable | LOC644303 |
| 0.962417044 | stable | HSPH1     |
| 0.962417044 | stable | PRMT6     |
| 0.962417044 | stable | LOC648358 |
| 0.962417044 | stable | CDK4      |
| 0.962458771 | stable | LOC652588 |
| 0.962473154 | stable | LOC644951 |
| 0.962610928 | stable | LOC728032 |
| 0.962612276 | stable | LOC731085 |
| 0.962711283 | stable | HIST1H2AK |
| 0.962711283 | stable | LOC643752 |
| 0.962711283 | stable | DNPEP     |
| 0.962737348 | stable | LOC649075 |
| 0.962805352 | stable | HNRPDL    |
| 0.962817354 | stable | PPY2      |
| 0.9628603   | stable | HRASLS2   |
| 0.96295489  | stable | LOC728119 |
| 0.96295489  | stable | FBXW4     |
| 0.96295489  | stable | FKBP7     |
| 0.962971932 | stable | SLC22A12  |
| 0.962971932 | stable | H1FOO     |
| 0.963059959 | stable | CHP2      |
| 0.96315339  | stable | LOC402665 |
| 0.963164483 | stable | CCDC4     |
| 0.963167174 | stable | LOC644573 |
| 0.963167174 | stable | WNT8B     |
| 0.963167174 | stable | TTY4      |
| 0.963339282 | stable | NOXA1     |
| 0.963376975 | stable | LOC644968 |
| 0.963382337 | stable | PIP5K1A   |
| 0.963382337 | stable | LOC652349 |
| 0.963382337 | stable | OR10G9    |
| 0.963402169 | stable | CACNG5    |
| 0.963441056 | stable | LOC648000 |
| 0.963472503 | stable | LOC644021 |
| 0.963539336 | stable | EDC4      |
| 0.963539336 | stable | EIF2C1    |
| 0.963539336 | stable | GPC5      |
| 0.963539336 | stable | NRN1      |
| 0.963611892 | stable | RPS26L    |
| 0.963659957 | stable | LOC161527 |
| 0.963678494 | stable | LOC653427 |
| 0.963678494 | stable | LOC642902 |
| 0.96370352  | stable | LOC642628 |
| 0.963741191 | stable | MPN2      |

DEG.infomation

|             |        |           |
|-------------|--------|-----------|
| 0.963741191 | stable | C12ORF50  |
| 0.963741191 | stable | STRADA    |
| 0.963741191 | stable | OR4M2     |
| 0.963741191 | stable | TRPC4     |
| 0.96387793  | stable | CCDC27    |
| 0.96387793  | stable | MCAT      |
| 0.96387793  | stable | GPR78     |
| 0.96387793  | stable | LOC389333 |
| 0.96387793  | stable | LOC641518 |
| 0.96387793  | stable | OR1J4     |
| 0.96387793  | stable | CALCR     |
| 0.96387793  | stable | TOR1A     |
| 0.96387793  | stable | LOC391033 |
| 0.96387793  | stable | SRY       |
| 0.96387793  | stable | TENC1     |
| 0.96387793  | stable | CTSL3     |
| 0.96387793  | stable | OR8J1     |
| 0.96387793  | stable | GPR18     |
| 0.963889874 | stable | LOC653652 |
| 0.963896161 | stable | CST4      |
| 0.963896161 | stable | GBP6      |
| 0.963943903 | stable | LOC649030 |
| 0.963951507 | stable | LOC286478 |
| 0.964152421 | stable | LOC728241 |
| 0.964328637 | stable | LOC284009 |
| 0.964330399 | stable | DDX10     |
| 0.964351908 | stable | LOC388910 |
| 0.964351908 | stable | KIAA1026  |
| 0.964351908 | stable | LOC137107 |
| 0.964351908 | stable | ARID3C    |
| 0.964406414 | stable | LOC644917 |
| 0.964493116 | stable | LOC645581 |
| 0.964493116 | stable | PSG9      |
| 0.964493116 | stable | POLH      |
| 0.964493116 | stable | EXOSC2    |
| 0.964504736 | stable | LOC649613 |
| 0.964504736 | stable | FLJ36701  |
| 0.964504736 | stable | HBD       |
| 0.964504736 | stable | LOC649542 |
| 0.964504736 | stable | LOC645722 |
| 0.964504736 | stable | LOC649593 |
| 0.964504736 | stable | FUT9      |
| 0.964523271 | stable | HIST1H2AG |
| 0.964556244 | stable | ATAD5     |
| 0.964556244 | stable | LOC644229 |
| 0.96457537  | stable | ATP8A2    |
| 0.964603965 | stable | PORCN     |
| 0.964794731 | stable | LOC653193 |
| 0.964850982 | stable | MYADML    |
| 0.964850982 | stable | MTNR1B    |
| 0.964850982 | stable | TRIM59    |

## DEG.infomation

|             |        |           |
|-------------|--------|-----------|
| 0.964850982 | stable | CYP26A1   |
| 0.964850982 | stable | FLJ23356  |
| 0.964850982 | stable | C11ORF35  |
| 0.964863826 | stable | ACSM2B    |
| 0.964868657 | stable | LOC645335 |
| 0.964886218 | stable | DHCR24    |
| 0.96489352  | stable | FSHR      |
| 0.96489352  | stable | LOC646713 |
| 0.964896049 | stable | STX1B     |
| 0.964896049 | stable | FLJ44006  |
| 0.964928453 | stable | LOC645723 |
| 0.964928453 | stable | TUBA4     |
| 0.964928453 | stable | LOC284912 |
| 0.964928453 | stable | LOC652864 |
| 0.964928453 | stable | CFHR3     |
| 0.964953442 | stable | LOC389362 |
| 0.965029054 | stable | FOXL2     |
| 0.965029054 | stable | BBS7      |
| 0.965029054 | stable | AIFM3     |
| 0.965029054 | stable | KCNK7     |
| 0.965078768 | stable | LOC440585 |
| 0.965137068 | stable | LOC440280 |
| 0.965251298 | stable | LOC643836 |
| 0.965265365 | stable | FLJ36031  |
| 0.965285986 | stable | DNAJC6    |
| 0.965285986 | stable | OR10A4    |
| 0.965315188 | stable | LOC652585 |
| 0.965315188 | stable | LOC649181 |
| 0.96536155  | stable | LOC648230 |
| 0.965458586 | stable | LOC402382 |
| 0.965458586 | stable | ZNF765    |
| 0.965458586 | stable | FAM19A2   |
| 0.965458586 | stable | LOC652000 |
| 0.965458586 | stable | LOC643191 |
| 0.965458586 | stable | LOC391761 |
| 0.965458586 | stable | LOC644922 |
| 0.965516603 | stable | CFDP1     |
| 0.965516603 | stable | ZBTB2     |
| 0.965516603 | stable | MITD1     |
| 0.965942512 | stable | CDH3      |
| 0.966073297 | stable | LOC57399  |
| 0.966112936 | stable | GOLT1B    |
| 0.966112936 | stable | TCL1B     |
| 0.966112936 | stable | C9ORF75   |
| 0.966150985 | stable | ARID3B    |
| 0.966150985 | stable | DMRT2     |
| 0.966150985 | stable | PRSS16    |
| 0.966351666 | stable | LRP5L     |
| 0.966351666 | stable | C1ORF167  |
| 0.966546264 | stable | TMPRSS2   |
| 0.966637118 | stable | OR6C75    |



## DEG.infomation

|             |        |           |
|-------------|--------|-----------|
| 0.966637118 | stable | LOC644341 |
| 0.966637118 | stable | C6ORF126  |
| 0.966657999 | stable | LOC731658 |
| 0.966796394 | stable | CALR3     |
| 0.966895424 | stable | LOC402573 |
| 0.966895424 | stable | SFXN1     |
| 0.966932041 | stable | SORL1     |
| 0.96694589  | stable | AGAP7     |
| 0.96694589  | stable | PRR18     |
| 0.96694589  | stable | LOC644391 |
| 0.96694589  | stable | LOC645812 |
| 0.967006676 | stable | LOC652383 |
| 0.967075824 | stable | LOC128102 |
| 0.967075824 | stable | LOC154872 |
| 0.967075824 | stable | C1ORF127  |
| 0.967075824 | stable | PAGE2     |
| 0.967244133 | stable | MED29     |
| 0.9674295   | stable | LOC650933 |
| 0.967567469 | stable | CLDN7     |
| 0.967612158 | stable | LOC647479 |
| 0.967612158 | stable | SCGB2A1   |
| 0.967653083 | stable | LOC645843 |
| 0.967737682 | stable | LOC642548 |
| 0.967737682 | stable | LOC642220 |
| 0.967737682 | stable | LOC647942 |
| 0.967737682 | stable | PSKH2     |
| 0.967737682 | stable | C11ORF55  |
| 0.967737682 | stable | LOC642101 |
| 0.96776666  | stable | RPS4Y2    |
| 0.967854779 | stable | MAPBPIP   |
| 0.967896739 | stable | ZNF398    |
| 0.967906175 | stable | C1ORF95   |
| 0.96800655  | stable | KRT40     |
| 0.96800655  | stable | HIST1H4B  |
| 0.96800655  | stable | GPR31     |
| 0.96800655  | stable | LOC441097 |
| 0.968053978 | stable | HOXD8     |
| 0.968188612 | stable | LOC645660 |
| 0.968311927 | stable | TRIM17    |
| 0.968313999 | stable | FADS6     |
| 0.968313999 | stable | MC4R      |
| 0.968371561 | stable | FLJ00312  |
| 0.968371561 | stable | LOC646424 |
| 0.968427408 | stable | LOC131055 |
| 0.968563768 | stable | CTNNA1    |
| 0.968572603 | stable | AP3B2     |
| 0.968703998 | stable | LOC644152 |
| 0.968783112 | stable | LOC646915 |
| 0.968801077 | stable | LOC649167 |
| 0.968835666 | stable | SLC37A2   |
| 0.968835666 | stable | LOC643755 |

## DEG.infomation

|             |        |           |
|-------------|--------|-----------|
| 0.968835666 | stable | LOC146053 |
| 0.968835666 | stable | LRRC16    |
| 0.968835666 | stable | CCDC73    |
| 0.968835666 | stable | BNC1      |
| 0.968835666 | stable | LOC650195 |
| 0.968835666 | stable | LOC644064 |
| 0.968835666 | stable | ZC3HC1    |
| 0.968947581 | stable | LOC643879 |
| 0.969068613 | stable | LOC645359 |
| 0.969075338 | stable | LOC652427 |
| 0.969075338 | stable | LOC646951 |
| 0.969075338 | stable | CBLL1     |
| 0.969075338 | stable | OLFM2     |
| 0.969075338 | stable | LOC643081 |
| 0.969075338 | stable | ATP12A    |
| 0.969075338 | stable | CCDC52    |
| 0.969075338 | stable | LOC649071 |
| 0.969075338 | stable | LOC644379 |
| 0.969075338 | stable | LOC644201 |
| 0.969075338 | stable | PHOSPHO1  |
| 0.969075338 | stable | LOC649722 |
| 0.969075338 | stable | MGC44328  |
| 0.969075338 | stable | LOC646716 |
| 0.969075338 | stable | KRTAP3-1  |
| 0.969075338 | stable | LOC642833 |
| 0.969075338 | stable | TGFBR1    |
| 0.969075338 | stable | BLMH      |
| 0.969075338 | stable | LOC550631 |
| 0.969095973 | stable | LY6K      |
| 0.969095973 | stable | SORCS3    |
| 0.969095973 | stable | VTI1A     |
| 0.969095973 | stable | OR52D1    |
| 0.969095973 | stable | VENTXP7   |
| 0.969095973 | stable | MMP10     |
| 0.969095973 | stable | OASL      |
| 0.969095973 | stable | LOC641753 |
| 0.969095973 | stable | LOC648795 |
| 0.969186011 | stable | LOC646888 |
| 0.969186011 | stable | PINX1     |
| 0.969211769 | stable | C21ORF77  |
| 0.969235292 | stable | CACNB4    |
| 0.969292234 | stable | CLEC1B    |
| 0.969394626 | stable | GDF11     |
| 0.969497542 | stable | NPAL2     |
| 0.969513368 | stable | UNC13C    |
| 0.96953701  | stable | LOC389072 |
| 0.969585268 | stable | SOCS7     |
| 0.969585268 | stable | LOC648816 |
| 0.969585268 | stable | RCC1      |
| 0.969642901 | stable | TSC2      |
| 0.969820021 | stable | PCDHGA1   |

## DEG.infomation

|             |        |           |
|-------------|--------|-----------|
| 0.969820021 | stable | LOC652015 |
| 0.969820021 | stable | LOC641977 |
| 0.969820021 | stable | OR5T3     |
| 0.969820021 | stable | LOC653528 |
| 0.969820021 | stable | LOC646207 |
| 0.969820021 | stable | ATRN      |
| 0.969820021 | stable | UNQ9391   |
| 0.969820021 | stable | LOC651495 |
| 0.969947301 | stable | SHC3      |
| 0.970045971 | stable | NBPF7     |
| 0.970045971 | stable | SNORD18B  |
| 0.970045971 | stable | HRES1     |
| 0.970045971 | stable | LOC152118 |
| 0.970069293 | stable | LOC653806 |
| 0.970222504 | stable | IL9       |
| 0.970226536 | stable | SLC25A31  |
| 0.970226536 | stable | KIAA1906  |
| 0.970226536 | stable | OIT3      |
| 0.970226536 | stable | LOC646932 |
| 0.970244476 | stable | CXORF48   |
| 0.970253963 | stable | LOC391727 |
| 0.970284462 | stable | CCDC146   |
| 0.970418422 | stable | SLC35D2   |
| 0.970418422 | stable | LOC731837 |
| 0.970424702 | stable | LOC644231 |
| 0.970424702 | stable | C6ORF122  |
| 0.970424702 | stable | PIP       |
| 0.970424702 | stable | LCE2B     |
| 0.970424702 | stable | LOC650678 |
| 0.970424702 | stable | CELP      |
| 0.970424702 | stable | TRPS1     |
| 0.970424702 | stable | GDF3      |
| 0.970424702 | stable | RPS14     |
| 0.970424702 | stable | LOC654209 |
| 0.970539902 | stable | LOC653554 |
| 0.970539902 | stable | CYP2C8    |
| 0.970539902 | stable | DEFB105A  |
| 0.970539902 | stable | CNTNAP2   |
| 0.970539902 | stable | LOC650040 |
| 0.970539902 | stable | DNTT      |
| 0.970539902 | stable | OR8K1     |
| 0.97058924  | stable | LOC653088 |
| 0.97058924  | stable | PPP2R5C   |
| 0.97058924  | stable | TAPBPL    |
| 0.97058924  | stable | LOC442049 |
| 0.970608085 | stable | C1ORF146  |
| 0.970615082 | stable | SNORD33   |
| 0.970656659 | stable | LOC650034 |
| 0.970656659 | stable | FAM9A     |
| 0.970656659 | stable | LOC654121 |
| 0.970863899 | stable | FAM75A1   |

## DEG.infomation

|             |        |           |
|-------------|--------|-----------|
| 0.971103608 | stable | LOC442570 |
| 0.971103608 | stable | RGS9BP    |
| 0.971103608 | stable | GPR97     |
| 0.971103608 | stable | LOC643033 |
| 0.971239709 | stable | LOC648240 |
| 0.971239709 | stable | C16ORF78  |
| 0.971239709 | stable | SSTR1     |
| 0.971249941 | stable | GPR98     |
| 0.971249941 | stable | RAB36     |
| 0.971275072 | stable | DCHS2     |
| 0.971285672 | stable | LOC651101 |
| 0.971285672 | stable | TSHZ3     |
| 0.971285672 | stable | LOC642381 |
| 0.971285672 | stable | HOXB6     |
| 0.971285672 | stable | OR1J2     |
| 0.97130675  | stable | LOC647582 |
| 0.97130675  | stable | KIR2DS2   |
| 0.971326689 | stable | LOC647199 |
| 0.971385047 | stable | S100A7A   |
| 0.971445794 | stable | LOC729985 |
| 0.971654901 | stable | LOC646004 |
| 0.971690813 | stable | HSPD1     |
| 0.971690813 | stable | NEK2      |
| 0.971755466 | stable | RBP5      |
| 0.971795819 | stable | HIST1H2AB |
| 0.971831656 | stable | LOC643502 |
| 0.971831656 | stable | LOC653667 |
| 0.971831656 | stable | PF4       |
| 0.971831656 | stable | PODNL1    |
| 0.971838406 | stable | CBX6      |
| 0.971838406 | stable | CYP2F1    |
| 0.971905305 | stable | LOC643850 |
| 0.971905305 | stable | LOC650751 |
| 0.971905305 | stable | ICAM1     |
| 0.971906583 | stable | FTSJ3     |
| 0.971915088 | stable | LGALS14   |
| 0.971915088 | stable | RASSF8    |
| 0.971915088 | stable | OIP5      |
| 0.971953904 | stable | HOXB3     |
| 0.971953904 | stable | LOC647417 |
| 0.971953904 | stable | LOC285544 |
| 0.971953904 | stable | C3ORF63   |
| 0.971953904 | stable | DAPL1     |
| 0.971953904 | stable | C20ORF4   |
| 0.971953904 | stable | OR2T6     |
| 0.971953904 | stable | BTBD17    |
| 0.971953904 | stable | SLC24A2   |
| 0.971953904 | stable | LOC647894 |
| 0.971953904 | stable | SLC3A1    |
| 0.971953904 | stable | ZNF114    |
| 0.971960761 | stable | C10ORF79  |

## DEG.infomation

|             |        |           |
|-------------|--------|-----------|
| 0.971960761 | stable | LOC401164 |
| 0.971960761 | stable | VKORC1L1  |
| 0.972043603 | stable | LRRC4     |
| 0.972043603 | stable | LOC651175 |
| 0.972064714 | stable | DIAPH1    |
| 0.972266497 | stable | MOV10     |
| 0.972331668 | stable | KLK6      |
| 0.972331668 | stable | CCNH      |
| 0.972331668 | stable | LOC643286 |
| 0.972331668 | stable | COX411    |
| 0.972331668 | stable | LOC644447 |
| 0.972333217 | stable | LOC729238 |
| 0.972336084 | stable | SLC22A3   |
| 0.972435158 | stable | MARK4     |
| 0.972453696 | stable | RPS26P10  |
| 0.972623865 | stable | KCTD19    |
| 0.972812307 | stable | TDH       |
| 0.972812307 | stable | ENPP3     |
| 0.972812307 | stable | LOC649841 |
| 0.97283262  | stable | PTCHD3    |
| 0.972855687 | stable | CYP3A7    |
| 0.972915223 | stable | TMEM184B  |
| 0.972915223 | stable | LPIN1     |
| 0.973080416 | stable | TMEM120A  |
| 0.97308471  | stable | JMJD2C    |
| 0.97308471  | stable | STON2     |
| 0.97308471  | stable | LOC651772 |
| 0.97361693  | stable | MYEOV     |
| 0.973641039 | stable | NRTN      |
| 0.973641039 | stable | HIST2H2BF |
| 0.973641039 | stable | SPTA1     |
| 0.973669385 | stable | ERO1LB    |
| 0.97375542  | stable | KRT28     |
| 0.97375542  | stable | CCDC22    |
| 0.97375542  | stable | EIF3F     |
| 0.973803608 | stable | DEFB123   |
| 0.973821376 | stable | LOC650330 |
| 0.973837162 | stable | LOC643699 |
| 0.973848652 | stable | LOC647257 |
| 0.973848652 | stable | LOC441964 |
| 0.973848652 | stable | SELPLG    |
| 0.973895214 | stable | C3ORF20   |
| 0.973909384 | stable | LOC642293 |
| 0.974163648 | stable | FLJ31568  |
| 0.974313335 | stable | GPX2      |
| 0.974349326 | stable | CYP1A2    |
| 0.974504385 | stable | PSD2      |
| 0.974504385 | stable | LOC645413 |
| 0.974551127 | stable | PRO0132   |
| 0.974654703 | stable | APOL4     |
| 0.97472185  | stable | LOC730419 |

## DEG.infomation

|             |        |           |
|-------------|--------|-----------|
| 0.974738322 | stable | LOC644963 |
| 0.974755987 | stable | LOC643677 |
| 0.974755987 | stable | LOC650620 |
| 0.974793244 | stable | MUC15     |
| 0.974793244 | stable | LOC647995 |
| 0.974793244 | stable | LOC650256 |
| 0.974793244 | stable | FLJ34306  |
| 0.974793244 | stable | LOC643468 |
| 0.974793244 | stable | SNORD27   |
| 0.974793244 | stable | LOC653616 |
| 0.974793244 | stable | MESP2     |
| 0.974793244 | stable | LOC644880 |
| 0.974799845 | stable | UBE2E3    |
| 0.974799845 | stable | GSTM4     |
| 0.974799845 | stable | TMEM171   |
| 0.974814231 | stable | CCT4      |
| 0.974819725 | stable | ZNF833    |
| 0.974852559 | stable | LOC649276 |
| 0.974852559 | stable | HRAS      |
| 0.974892077 | stable | RXFP1     |
| 0.974892077 | stable | MRPL32    |
| 0.974892077 | stable | NOTCH2NL  |
| 0.975000807 | stable | LOC389936 |
| 0.975091529 | stable | LOC642359 |
| 0.975091529 | stable | C20ORF77  |
| 0.975091529 | stable | CCDC36    |
| 0.975091529 | stable | C21ORF94  |
| 0.975105141 | stable | HIST1H4K  |
| 0.975105141 | stable | UGT1A4    |
| 0.975105141 | stable | CPN2      |
| 0.975124702 | stable | LOC654249 |
| 0.975487186 | stable | LOC647436 |
| 0.975487186 | stable | A1CF      |
| 0.975496675 | stable | PCSK2     |
| 0.975496675 | stable | LOC651820 |
| 0.975890962 | stable | LOC647979 |
| 0.975890962 | stable | PGAM4     |
| 0.975890962 | stable | LOC401296 |
| 0.975890962 | stable | SMG7      |
| 0.975890962 | stable | ST7OT2    |
| 0.975890962 | stable | ISX       |
| 0.975982089 | stable | LOC652076 |
| 0.976025445 | stable | LOC388117 |
| 0.976025445 | stable | CFHR2     |
| 0.976025445 | stable | LOC652505 |
| 0.976118095 | stable | HIST1H1E  |
| 0.976118095 | stable | SLC6A10P  |
| 0.976118095 | stable | COX10     |
| 0.976118095 | stable | ZNF749    |
| 0.976118095 | stable | UBXN10    |
| 0.976118095 | stable | LOC653362 |

## DEG.infomation

|             |        |           |
|-------------|--------|-----------|
| 0.976118095 | stable | ANO9      |
| 0.976240098 | stable | LOC642360 |
| 0.976293083 | stable | ACCN1     |
| 0.976293083 | stable | LOC648623 |
| 0.976317377 | stable | LOC642490 |
| 0.976365601 | stable | LOC404266 |
| 0.976640438 | stable | C17ORF64  |
| 0.976640438 | stable | DLX4      |
| 0.976878859 | stable | ZNF8      |
| 0.976911538 | stable | GALNT6    |
| 0.97709734  | stable | SPTY2D1   |
| 0.977161898 | stable | AKR1CL1   |
| 0.977432044 | stable | BNIP1     |
| 0.977432044 | stable | OR4A47    |
| 0.977432044 | stable | LOC651713 |
| 0.977432044 | stable | RNF166    |
| 0.977432044 | stable | HLA-DPB2  |
| 0.977432044 | stable | PCDHGA10  |
| 0.977432044 | stable | LOC126767 |
| 0.977432044 | stable | CCDC153   |
| 0.977432044 | stable | C10ORF62  |
| 0.977432044 | stable | MYLC2PL   |
| 0.977432044 | stable | LOC652094 |
| 0.977432044 | stable | ATP6V1C1  |
| 0.977432044 | stable | FLJ44861  |
| 0.977562934 | stable | SP7       |
| 0.977966349 | stable | LOC727773 |
| 0.977966349 | stable | PLA2G3    |
| 0.977966349 | stable | UNG2      |
| 0.977966349 | stable | LOC731985 |
| 0.977966349 | stable | FOXR2     |
| 0.977989405 | stable | RIBC2     |
| 0.977989405 | stable | NPR1      |
| 0.977989405 | stable | LOC730746 |
| 0.978035096 | stable | FLJ20297  |
| 0.978035939 | stable | SMYD5     |
| 0.978035939 | stable | CPA5      |
| 0.978366443 | stable | LOC643792 |
| 0.978366443 | stable | RASSF3    |
| 0.978366443 | stable | SLC25A2   |
| 0.978366443 | stable | HIST1H2AA |
| 0.978366443 | stable | SMARCA1   |
| 0.978462593 | stable | LOC651758 |
| 0.978476423 | stable | KRTAP19-5 |
| 0.978508748 | stable | CAPN9     |
| 0.978508748 | stable | MRPS18C   |
| 0.978508748 | stable | LOC646879 |
| 0.978688081 | stable | LOC730684 |
| 0.978688081 | stable | LOC646106 |
| 0.978688081 | stable | DSG1      |
| 0.978688081 | stable | GFRA4     |

## DEG.infomation

|             |        |           |
|-------------|--------|-----------|
| 0.978688081 | stable | RB1       |
| 0.978688081 | stable | ASCL4     |
| 0.978747965 | stable | KRT5      |
| 0.97878277  | stable | ZNF92     |
| 0.97878277  | stable | LOC651659 |
| 0.97878277  | stable | LOC389174 |
| 0.97878277  | stable | GUCY2C    |
| 0.97878277  | stable | FGA       |
| 0.979008114 | stable | ZBTB39    |
| 0.979008114 | stable | SAMD3     |
| 0.979070844 | stable | UMODL1    |
| 0.979122239 | stable | SMPD2     |
| 0.979122239 | stable | LOC390880 |
| 0.979122239 | stable | LOC731823 |
| 0.979160289 | stable | LOC649970 |
| 0.979171158 | stable | LOC647760 |
| 0.979200633 | stable | FLJ34690  |
| 0.979200633 | stable | LOC441377 |
| 0.979317103 | stable | SRMS      |
| 0.979317103 | stable | SPRR2F    |
| 0.979348781 | stable | LOC647527 |
| 0.979348781 | stable | SFRS11    |
| 0.979406539 | stable | FMO5      |
| 0.979485189 | stable | HRASLS5   |
| 0.979485189 | stable | LOC651410 |
| 0.979485189 | stable | ALOX15    |
| 0.979485189 | stable | KIF18A    |
| 0.979485189 | stable | LOC643369 |
| 0.979485189 | stable | LOC392447 |
| 0.979485189 | stable | NKX6-1    |
| 0.979485189 | stable | LOC642646 |
| 0.979485189 | stable | MGC33948  |
| 0.979485189 | stable | FBS1      |
| 0.979485189 | stable | C17ORF46  |
| 0.97948538  | stable | MS4A15    |
| 0.979526883 | stable | LOC652769 |
| 0.979526883 | stable | SACS      |
| 0.979581752 | stable | SH3RF3    |
| 0.979686132 | stable | LOC646444 |
| 0.979686132 | stable | LOC727811 |
| 0.979686132 | stable | TOP1      |
| 0.979686132 | stable | TPD52L3   |
| 0.979686132 | stable | TMEM160   |
| 0.979686132 | stable | LOC285307 |
| 0.979686132 | stable | ADRB3     |
| 0.979686132 | stable | SNHG4     |
| 0.979686132 | stable | SARDH     |
| 0.979686132 | stable | ZNF773    |
| 0.979686132 | stable | LOC652175 |
| 0.979686132 | stable | CRK       |
| 0.979686132 | stable | ZNF101    |



## DEG.infomation

|             |        |           |
|-------------|--------|-----------|
| 0.979686132 | stable | TMEM222   |
| 0.979686132 | stable | MATN3     |
| 0.979694692 | stable | LOC643454 |
| 0.979771065 | stable | YPEL4     |
| 0.979771065 | stable | WFDC6     |
| 0.979771065 | stable | LOC646361 |
| 0.979779903 | stable | TTL       |
| 0.979780161 | stable | LOC645679 |
| 0.979863512 | stable | FUT5      |
| 0.979863512 | stable | STAP2     |
| 0.979863512 | stable | C12ORF11  |
| 0.979941923 | stable | RPL23AP13 |
| 0.979959476 | stable | SEC22B    |
| 0.980030068 | stable | LOC648955 |
| 0.980128444 | stable | LOC729754 |
| 0.980191137 | stable | LOC642213 |
| 0.980211347 | stable | LOC136157 |
| 0.980211347 | stable | CHERP     |
| 0.980265038 | stable | COX7B2    |
| 0.980265038 | stable | LOC646630 |
| 0.980325456 | stable | PRO1768   |
| 0.980407501 | stable | FOXB1     |
| 0.980407501 | stable | TBC1D10B  |
| 0.980407501 | stable | LOC644719 |
| 0.980407501 | stable | CKAP2L    |
| 0.980407501 | stable | CCDC42    |
| 0.980407501 | stable | LOC441488 |
| 0.980427013 | stable | LOC648680 |
| 0.980439788 | stable | LOC389634 |
| 0.980646868 | stable | LOC653935 |
| 0.980649257 | stable | MYOG      |
| 0.98066559  | stable | FLJ46156  |
| 0.98066559  | stable | FLCN      |
| 0.98066559  | stable | STAC2     |
| 0.98066559  | stable | SMA3      |
| 0.980672609 | stable | ZP2       |
| 0.9807028   | stable | LCE2D     |
| 0.980709055 | stable | FLJ20184  |
| 0.980709055 | stable | PARP1     |
| 0.980709055 | stable | MARS      |
| 0.980709055 | stable | TTY10     |
| 0.980889096 | stable | REG4      |
| 0.981039375 | stable | TPSD1     |
| 0.981095135 | stable | LOC648615 |
| 0.981173859 | stable | LOC440145 |
| 0.981185043 | stable | FLJ44450  |
| 0.981209401 | stable | LOC440261 |
| 0.981209401 | stable | CASP8     |
| 0.981499561 | stable | LOC647534 |
| 0.981505201 | stable | CCAR1     |
| 0.981505201 | stable | LOC643747 |

## DEG.infomation

|             |        |           |
|-------------|--------|-----------|
| 0.981545141 | stable | FERD3L    |
| 0.981726885 | stable | SLFN12    |
| 0.981832331 | stable | LOC653060 |
| 0.981832331 | stable | HARBI1    |
| 0.981832331 | stable | LOC651694 |
| 0.981963712 | stable | FLJ12331  |
| 0.981963712 | stable | OR3A1     |
| 0.981963712 | stable | TSC22D2   |
| 0.981963712 | stable | GDF2      |
| 0.982521382 | stable | CASS4     |
| 0.982535668 | stable | C12ORF64  |
| 0.982574285 | stable | UGT8      |
| 0.982610327 | stable | LOC652740 |
| 0.982610327 | stable | PRAMEF1   |
| 0.982610327 | stable | GNAL      |
| 0.982667164 | stable | LOC339782 |
| 0.982893779 | stable | LOC645941 |
| 0.982893779 | stable | LOC651118 |
| 0.982893779 | stable | TXK       |
| 0.982893779 | stable | LOC642188 |
| 0.982893779 | stable | PCDHB16   |
| 0.982893779 | stable | ECAT8     |
| 0.982893779 | stable | PNLIPRP2  |
| 0.982893779 | stable | ELAVL3    |
| 0.982893779 | stable | OR5T2     |
| 0.982954143 | stable | RXR8      |
| 0.983032633 | stable | LOC650767 |
| 0.983297445 | stable | ITIH1     |
| 0.983400843 | stable | LOC644087 |
| 0.983528659 | stable | TUBAL3    |
| 0.983543441 | stable | CIT       |
| 0.983600866 | stable | COX8C     |
| 0.983600866 | stable | CASP10    |
| 0.983600866 | stable | UBXN6     |
| 0.983606959 | stable | LOC650243 |
| 0.983624321 | stable | LOC644331 |
| 0.983786728 | stable | LOC644187 |
| 0.983794299 | stable | TCEA3     |
| 0.983825239 | stable | EIF4E2    |
| 0.983966598 | stable | PSEN1     |
| 0.983966598 | stable | ARFRP1    |
| 0.983995002 | stable | GSTM1L    |
| 0.983995002 | stable | C6ORF141  |
| 0.984060602 | stable | LOC644298 |
| 0.984121045 | stable | ASCL1     |
| 0.984121045 | stable | KIF12     |
| 0.984121045 | stable | ARID1B    |
| 0.984121045 | stable | RAB6C     |
| 0.984121045 | stable | IGFALS    |
| 0.984149143 | stable | DSPP      |
| 0.984149143 | stable | RNF10     |

DEG.infomation

|             |        |           |
|-------------|--------|-----------|
| 0.984149143 | stable | LOC144817 |
| 0.984149143 | stable | OR4K17    |
| 0.984149143 | stable | SBDS      |
| 0.984149143 | stable | TYMS      |
| 0.984158974 | stable | H2AFB3    |
| 0.984158974 | stable | LOC652833 |
| 0.984165366 | stable | APOC2     |
| 0.984165366 | stable | C11ORF10  |
| 0.984211877 | stable | LOC651065 |
| 0.984231281 | stable | IRF2      |
| 0.984231281 | stable | RUNDC3B   |
| 0.984231281 | stable | PRSS21    |
| 0.984250436 | stable | C1ORF150  |
| 0.984250436 | stable | KIRREL2   |
| 0.984250436 | stable | KRTAP4-12 |
| 0.984250436 | stable | LOC644658 |
| 0.984250436 | stable | SAR1A     |
| 0.984250436 | stable | POLA      |
| 0.984250436 | stable | NOBOX     |
| 0.984250436 | stable | DEFB136   |
| 0.984363758 | stable | C7ORF52   |
| 0.984408238 | stable | MCCD1     |
| 0.984408238 | stable | C16ORF65  |
| 0.984408238 | stable | LOC729900 |
| 0.984440959 | stable | LOC643094 |
| 0.984440959 | stable | LOC643093 |
| 0.984440959 | stable | LOC644365 |
| 0.984440959 | stable | ZNF221    |
| 0.984545149 | stable | LOC646786 |
| 0.984545149 | stable | LOC646241 |
| 0.984545149 | stable | CLEC2L    |
| 0.984545149 | stable | CACNG4    |
| 0.984545149 | stable | LOC442535 |
| 0.984545149 | stable | TTY14     |
| 0.984574694 | stable | LOC645460 |
| 0.984574694 | stable | LOC653056 |
| 0.984574694 | stable | LOC442096 |
| 0.984589467 | stable | ADAM5     |
| 0.984589467 | stable | LOC647353 |
| 0.984589467 | stable | CILP2     |
| 0.984589467 | stable | TMC1      |
| 0.984697078 | stable | GALK2     |
| 0.984697078 | stable | ITPRIPL1  |
| 0.984697078 | stable | LOC651122 |
| 0.984739384 | stable | LOC651212 |
| 0.984739384 | stable | KIAA1432  |
| 0.984739384 | stable | LOC652845 |
| 0.984798593 | stable | HMX3      |
| 0.984798593 | stable | LOC441843 |
| 0.984880928 | stable | ITGB1BP3  |
| 0.984895313 | stable | LOC388630 |

## DEG.infomation

|             |        |           |
|-------------|--------|-----------|
| 0.984898332 | stable | LOC646481 |
| 0.984952708 | stable | ATXN2L    |
| 0.984958273 | stable | LOC126661 |
| 0.984958273 | stable | CYP2A7    |
| 0.985001164 | stable | AHI1      |
| 0.985018732 | stable | LOC653169 |
| 0.985018732 | stable | ZBTB7A    |
| 0.985018732 | stable | LOC645661 |
| 0.985018732 | stable | AP1S2     |
| 0.985018732 | stable | MTM       |
| 0.985018732 | stable | IER3IP1   |
| 0.985018732 | stable | LOC643901 |
| 0.985018732 | stable | INTS12    |
| 0.98508587  | stable | SLC7A3    |
| 0.985271206 | stable | LOC648552 |
| 0.985302626 | stable | REEP3     |
| 0.985750249 | stable | PRAMEF21  |
| 0.985791716 | stable | NCK2      |
| 0.985818523 | stable | LOC645459 |
| 0.985836537 | stable | CASRL1    |
| 0.985836537 | stable | LOC730926 |
| 0.985836537 | stable | BTNL3     |
| 0.985836537 | stable | LOC727832 |
| 0.985836537 | stable | PHF21B    |
| 0.985836537 | stable | DLGAP1    |
| 0.985836537 | stable | ADAM32    |
| 0.985923591 | stable | LOC652804 |
| 0.985934143 | stable | PLXNC1    |
| 0.985934143 | stable | C10ORF136 |
| 0.985934143 | stable | LOC731106 |
| 0.985934143 | stable | DUSP14    |
| 0.986063531 | stable | INSL4     |
| 0.986063531 | stable | WSCD2     |
| 0.986063531 | stable | CXORF12   |
| 0.986063531 | stable | CDY2A     |
| 0.986063531 | stable | LOC642645 |
| 0.986097896 | stable | OR4E2     |
| 0.986097896 | stable | SMR3B     |
| 0.98629608  | stable | NOXO1     |
| 0.986300729 | stable | LOC392481 |
| 0.986300729 | stable | KRTAP5-7  |
| 0.986301651 | stable | TBC1D28   |
| 0.986301651 | stable | PRDM7     |
| 0.986308732 | stable | ATP8B1    |
| 0.986315882 | stable | LOC644711 |
| 0.986315882 | stable | SNX29     |
| 0.9863342   | stable | NSMCE2    |
| 0.9863342   | stable | C10RF161  |
| 0.9863342   | stable | RMI1      |
| 0.9863342   | stable | SIRT3     |
| 0.986385607 | stable | LOC651373 |

## DEG.infomation

|             |        |           |
|-------------|--------|-----------|
| 0.986385607 | stable | LOC643231 |
| 0.986439631 | stable | DARS      |
| 0.986439631 | stable | TTL10     |
| 0.986439631 | stable | ANKRD36   |
| 0.986459736 | stable | KCTD17    |
| 0.986650684 | stable | APRIN     |
| 0.986653268 | stable | HTR3C     |
| 0.986673942 | stable | MAGEB6    |
| 0.986677229 | stable | IPO13     |
| 0.986677229 | stable | SCFD1     |
| 0.986797275 | stable | LOC728709 |
| 0.986827386 | stable | RAB3B     |
| 0.98696589  | stable | HMOX2     |
| 0.987139855 | stable | LOC644628 |
| 0.987139855 | stable | C9ORF45   |
| 0.987139855 | stable | IL1RAPL2  |
| 0.987139855 | stable | C1ORF177  |
| 0.98716665  | stable | TTC7B     |
| 0.987253733 | stable | CLDN23    |
| 0.987264831 | stable | LOC647849 |
| 0.987313146 | stable | C14ORF121 |
| 0.987331971 | stable | SFTPA1B   |
| 0.987331971 | stable | ZNF354B   |
| 0.987384401 | stable | RFX3      |
| 0.987384401 | stable | LOC650909 |
| 0.987402204 | stable | ANXA8L2   |
| 0.987402204 | stable | KIAA1826  |
| 0.987402204 | stable | FLJ35409  |
| 0.987463671 | stable | SPP2      |
| 0.987463671 | stable | CECR5     |
| 0.987463671 | stable | UGT1A10   |
| 0.987463671 | stable | LOC653097 |
| 0.987463671 | stable | SCT       |
| 0.987463671 | stable | SMCP      |
| 0.987463671 | stable | ZNF551    |
| 0.987463671 | stable | PCDHA6    |
| 0.98747582  | stable | LOC644787 |
| 0.98747582  | stable | ADRA2A    |
| 0.98747582  | stable | OR1N1     |
| 0.987723569 | stable | SLC6A16   |
| 0.987825404 | stable | HN1L      |
| 0.987825404 | stable | SEC11B    |
| 0.987909661 | stable | CXORF20   |
| 0.987909661 | stable | HIST1H3B  |
| 0.987965772 | stable | XKR9      |
| 0.988000285 | stable | CASP14    |
| 0.988000285 | stable | ARL10     |
| 0.988060879 | stable | CALCRL    |
| 0.988060879 | stable | DEFB119   |
| 0.988060879 | stable | LLGL2     |
| 0.988060879 | stable | ZFYVE28   |

## DEG.infomation

|             |        |           |
|-------------|--------|-----------|
| 0.988060879 | stable | HSD17B2   |
| 0.988060879 | stable | LOC652536 |
| 0.988060879 | stable | SAMD5     |
| 0.988060879 | stable | FAM169A   |
| 0.988060879 | stable | EPHA1     |
| 0.988060879 | stable | LGALS13   |
| 0.988060879 | stable | LOC652676 |
| 0.988060879 | stable | SUV420H2  |
| 0.988060879 | stable | PHKA2     |
| 0.988060879 | stable | LOC652774 |
| 0.988060879 | stable | ARL4A     |
| 0.988060879 | stable | LOC648553 |
| 0.988060879 | stable | LOC646569 |
| 0.988199967 | stable | TMED6     |
| 0.988282636 | stable | DNAJB2    |
| 0.988282636 | stable | LOC652150 |
| 0.988282636 | stable | LOC653321 |
| 0.988331989 | stable | KCTD11    |
| 0.988331989 | stable | C15ORF43  |
| 0.988364159 | stable | OVCH2     |
| 0.988407129 | stable | LOC647904 |
| 0.988449879 | stable | CDH20     |
| 0.988449879 | stable | MIS12     |
| 0.988449879 | stable | C2ORF3    |
| 0.988449879 | stable | CDC2L1    |
| 0.988449879 | stable | LOC401860 |
| 0.988449879 | stable | CHRNA2    |
| 0.988535537 | stable | LOC643388 |
| 0.988796616 | stable | WISP3     |
| 0.988796616 | stable | MAGEC3    |
| 0.988796616 | stable | KRTAP12-3 |
| 0.988796616 | stable | CXORF15   |
| 0.988818526 | stable | CCDC87    |
| 0.988994953 | stable | LOC649425 |
| 0.988994953 | stable | TBC1D12   |
| 0.988994953 | stable | PDZK3     |
| 0.989046046 | stable | CLDN17    |
| 0.989046046 | stable | GGTL3     |
| 0.989074905 | stable | LOC401222 |
| 0.989074905 | stable | TMEM16C   |
| 0.989198804 | stable | LOC642815 |
| 0.989341591 | stable | TAS2R40   |
| 0.989361142 | stable | LOC650422 |
| 0.989365414 | stable | DOCK7     |
| 0.989381197 | stable | ITGB3BP   |
| 0.989381197 | stable | AKAP3     |
| 0.989381197 | stable | LOC653855 |
| 0.989476072 | stable | LOC652256 |
| 0.989580867 | stable | LOC644598 |
| 0.989646737 | stable | C17ORF56  |
| 0.989646737 | stable | LOC652735 |

## DEG.infomation

|             |        |           |
|-------------|--------|-----------|
| 0.989743489 | stable | LOC645334 |
| 0.989990173 | stable | PLEKHA8   |
| 0.990158716 | stable | MAP3K5    |
| 0.990158716 | stable | C18ORF58  |
| 0.990193038 | stable | L1CAM     |
| 0.990363956 | stable | LOC647972 |
| 0.99041537  | stable | C20ORF197 |
| 0.99041537  | stable | LOC652753 |
| 0.990448214 | stable | LOC146177 |
| 0.99046035  | stable | LOC645438 |
| 0.99046035  | stable | GSTM3     |
| 0.99046035  | stable | LOC400955 |
| 0.99046035  | stable | LOC91431  |
| 0.99046035  | stable | LOC647206 |
| 0.99046035  | stable | LOC647400 |
| 0.990467933 | stable | LOC388381 |
| 0.990506001 | stable | LOC283152 |
| 0.990506001 | stable | LOC648979 |
| 0.990506001 | stable | LOC54103  |
| 0.990506001 | stable | IGFL2     |
| 0.990506001 | stable | RFX1      |
| 0.990506001 | stable | OR111     |
| 0.990506001 | stable | NKX1-1    |
| 0.99052021  | stable | KCNK4     |
| 0.990560438 | stable | EFNA3     |
| 0.990576633 | stable | LOC643784 |
| 0.990664412 | stable | C10ORF21  |
| 0.990878729 | stable | LOC152663 |
| 0.990962376 | stable | MAP7      |
| 0.990962376 | stable | C10ORF82  |
| 0.990962376 | stable | LOC649320 |
| 0.990962376 | stable | LOC650867 |
| 0.991001889 | stable | ADAD2     |
| 0.991001889 | stable | LOC343384 |
| 0.991001889 | stable | RHO       |
| 0.991017944 | stable | LOC653061 |
| 0.991067271 | stable | CDR1      |
| 0.991067271 | stable | ZCCHC16   |
| 0.991067271 | stable | LOC644241 |
| 0.991067271 | stable | NOSIP     |
| 0.991067271 | stable | KRTAP10-5 |
| 0.991091978 | stable | LOC652641 |
| 0.991131284 | stable | LOC642130 |
| 0.991131284 | stable | TRIM62    |
| 0.991131284 | stable | LOC649620 |
| 0.991131284 | stable | ZIC3      |
| 0.991131284 | stable | EME1      |
| 0.991131284 | stable | LOC338586 |
| 0.991199583 | stable | LOC647961 |
| 0.991199583 | stable | H1FNT     |
| 0.991199583 | stable | LOC649686 |

## DEG.infomation

|             |        |           |
|-------------|--------|-----------|
| 0.991199583 | stable | TNFRSF11A |
| 0.991199583 | stable | LOC654126 |
| 0.991404378 | stable | SSX4      |
| 0.991416075 | stable | LOC652593 |
| 0.991429173 | stable | GIN51     |
| 0.991429173 | stable | LOC644889 |
| 0.991441528 | stable | LOC439914 |
| 0.99149001  | stable | LOC440956 |
| 0.99149001  | stable | LOC389458 |
| 0.991586564 | stable | LOC650028 |
| 0.991586564 | stable | EPS8L2    |
| 0.991588398 | stable | LOC650210 |
| 0.991588398 | stable | XCL1      |
| 0.991588398 | stable | LOC644222 |
| 0.991588398 | stable | OR10J3    |
| 0.991588398 | stable | KARS      |
| 0.991588398 | stable | LOC644782 |
| 0.991588398 | stable | KLK5      |
| 0.991588398 | stable | LOC642161 |
| 0.991588398 | stable | LOC644704 |
| 0.991588398 | stable | S100A7    |
| 0.991588398 | stable | MSX2P1    |
| 0.991588398 | stable | LOC646041 |
| 0.991588398 | stable | LOC649466 |
| 0.991588398 | stable | NDUFB2    |
| 0.991588398 | stable | KRTAP19-1 |
| 0.991588398 | stable | F3        |
| 0.991588398 | stable | LOC644802 |
| 0.991588398 | stable | LOC642229 |
| 0.991588398 | stable | TBX21     |
| 0.991588398 | stable | FLJ44674  |
| 0.991588398 | stable | TRIM42    |
| 0.991588398 | stable | XPO5      |
| 0.991588398 | stable | TRAF2     |
| 0.991588398 | stable | NDUFS5    |
| 0.991588398 | stable | HABP2     |
| 0.991588398 | stable | SPINK9    |
| 0.991588398 | stable | LOC642819 |
| 0.991609372 | stable | DHRS13    |
| 0.99182506  | stable | LOC650280 |
| 0.992005158 | stable | LOC646573 |
| 0.992005158 | stable | DEPDC5    |
| 0.992005158 | stable | LOC652839 |
| 0.992005158 | stable | L1TD1     |
| 0.992031426 | stable | ABHD14A   |
| 0.992045852 | stable | GPR113    |
| 0.992045852 | stable | OXTR      |
| 0.992167377 | stable | NGDN      |
| 0.992203179 | stable | PIGY      |
| 0.992203179 | stable | KIAA0888  |
| 0.992223991 | stable | CMKLR1    |



## DEG.infomation

|             |        |               |
|-------------|--------|---------------|
| 0.992237529 | stable | LACRT         |
| 0.992510383 | stable | HTR1D         |
| 0.992579788 | stable | ZNF417        |
| 0.992579788 | stable | OR11L1        |
| 0.992579788 | stable | LOC654259     |
| 0.992579788 | stable | LOC389963     |
| 0.992579788 | stable | LOC342934     |
| 0.992579788 | stable | CAPNS2        |
| 0.992579788 | stable | PAX4          |
| 0.992579788 | stable | LOC646038     |
| 0.992579788 | stable | LOC646200     |
| 0.992592127 | stable | LOC650293     |
| 0.992592127 | stable | LOC647841     |
| 0.992592127 | stable | KIAA1614      |
| 0.992592127 | stable | XDH           |
| 0.992615932 | stable | GLIS2         |
| 0.992615932 | stable | NCAPH2        |
| 0.992615932 | stable | DKFZP686K1684 |
| 0.992615932 | stable | LOC646806     |
| 0.992615932 | stable | LOC646040     |
| 0.99267351  | stable | LOC653428     |
| 0.992679737 | stable | NEURL         |
| 0.992679737 | stable | LOC729193     |
| 0.992753549 | stable | CNBD1         |
| 0.992992747 | stable | CRHR1         |
| 0.993058451 | stable | TPM1          |
| 0.993061317 | stable | RNF151        |
| 0.993061317 | stable | CSRP2BP       |
| 0.993061317 | stable | CYP4F8        |
| 0.993061317 | stable | C1ORF104      |
| 0.993061317 | stable | LOC653253     |
| 0.993061317 | stable | KLHL35        |
| 0.993061317 | stable | PATL1         |
| 0.993061317 | stable | CA6           |
| 0.993061317 | stable | BRS3          |
| 0.993061317 | stable | HSPB8         |
| 0.993061317 | stable | PCSK9         |
| 0.993061317 | stable | KCNQ4         |
| 0.993061317 | stable | LOC644074     |
| 0.993061317 | stable | LOC388526     |
| 0.993061317 | stable | LOC127150     |
| 0.993061317 | stable | LOC284751     |
| 0.993061317 | stable | LOC646145     |
| 0.993061317 | stable | MCCC2         |
| 0.993061317 | stable | GJB1          |
| 0.993061317 | stable | BFAR          |
| 0.993174497 | stable | FGD1          |
| 0.993174497 | stable | ZNF313        |
| 0.993174497 | stable | LSR           |
| 0.993174497 | stable | RIPK4         |
| 0.993282491 | stable | PARP6         |

DEG.infomation

|             |        |              |
|-------------|--------|--------------|
| 0.993282491 | stable | UNC5C        |
| 0.993282491 | stable | LOC648699    |
| 0.993326941 | stable | TFAP2B       |
| 0.993384763 | stable | KLC3         |
| 0.993414565 | stable | DKFZP434L187 |
| 0.993414565 | stable | LOC647343    |
| 0.993414565 | stable | CBR1         |
| 0.993414565 | stable | TEKT2        |
| 0.993414565 | stable | LOC642194    |
| 0.99343836  | stable | LOC644262    |
| 0.99343836  | stable | SLC22A9      |
| 0.993442365 | stable | PLEKHH3      |
| 0.993508669 | stable | LOC441151    |
| 0.993508669 | stable | TTY15        |
| 0.993508669 | stable | SLC22A10     |
| 0.993508669 | stable | FAM156A      |
| 0.993508669 | stable | LOC643189    |
| 0.993550945 | stable | LOC100101120 |
| 0.993729592 | stable | LOC646582    |
| 0.993773285 | stable | ID2B         |
| 0.993773285 | stable | C5ORF36      |
| 0.993926369 | stable | LOC646130    |
| 0.993932568 | stable | NEO1         |
| 0.993977321 | stable | MT1L         |
| 0.994011854 | stable | DNAJC14      |
| 0.994199382 | stable | FBXL12       |
| 0.99420318  | stable | ST8SIA6      |
| 0.994268838 | stable | C14ORF165    |
| 0.994268838 | stable | SMEK1        |
| 0.994293987 | stable | PECR         |
| 0.994293987 | stable | LOC652119    |
| 0.994293987 | stable | LMOD3        |
| 0.994337927 | stable | LOC652077    |
| 0.994454375 | stable | C20ORF91     |
| 0.994559491 | stable | IFIH1        |
| 0.994559491 | stable | RRH          |
| 0.994559491 | stable | EHD2         |
| 0.994559491 | stable | TRIAP1       |
| 0.994559491 | stable | LOC648111    |
| 0.994617849 | stable | LOC646943    |
| 0.994617849 | stable | CARD10       |
| 0.994677659 | stable | IL2          |
| 0.994677659 | stable | LOC645626    |
| 0.994694141 | stable | PCDHGA6      |
| 0.994694141 | stable | HEPACAM2     |
| 0.994694141 | stable | ZNF99        |
| 0.994694141 | stable | SPANXB2      |
| 0.995085462 | stable | LOC650390    |
| 0.995085462 | stable | LOC651849    |
| 0.995085462 | stable | LOC653410    |
| 0.995085462 | stable | ZNF645       |

## DEG.infomation

|             |        |           |
|-------------|--------|-----------|
| 0.995085462 | stable | LOC651787 |
| 0.995085462 | stable | TRPV6     |
| 0.995085462 | stable | ZNF409    |
| 0.995085462 | stable | LOC652610 |
| 0.995085462 | stable | LOC650482 |
| 0.995085462 | stable | CDH8      |
| 0.995085462 | stable | ONECUT2   |
| 0.995085462 | stable | FAM153A   |
| 0.995085462 | stable | LOC651213 |
| 0.995085462 | stable | FDXR      |
| 0.995085462 | stable | CSF2      |
| 0.995085462 | stable | GAGE2C    |
| 0.995085462 | stable | KREMEN2   |
| 0.995085462 | stable | HGSNAT    |
| 0.995085462 | stable | SCAND3    |
| 0.995085462 | stable | LOC389217 |
| 0.995085462 | stable | DEFA4     |
| 0.995085462 | stable | LOC441395 |
| 0.995085462 | stable | PCDHA11   |
| 0.995085462 | stable | KRTAP19-7 |
| 0.995085462 | stable | SLC22A8   |
| 0.995388142 | stable | XCL2      |
| 0.995395445 | stable | GFRAL     |
| 0.995427372 | stable | LOC643426 |
| 0.995434726 | stable | LOC647335 |
| 0.995434726 | stable | C11ORF34  |
| 0.995473032 | stable | LOC729396 |
| 0.995537113 | stable | LOC651859 |
| 0.995537113 | stable | PKD2L2    |
| 0.995537113 | stable | LIMS3     |
| 0.995537113 | stable | FAM40A    |
| 0.995550194 | stable | LOC642606 |
| 0.995550194 | stable | TAS2R13   |
| 0.995550194 | stable | EPPK1     |
| 0.995550194 | stable | LOC651137 |
| 0.995571227 | stable | GPR45     |
| 0.995783047 | stable | ODAM      |
| 0.995934489 | stable | MIST      |
| 0.995997947 | stable | FAM184A   |
| 0.995997947 | stable | LOC647680 |
| 0.996076612 | stable | LOC651341 |
| 0.996125934 | stable | LOC643107 |
| 0.996140561 | stable | MYEF2     |
| 0.996140561 | stable | LOC400793 |
| 0.996140561 | stable | LOC642587 |
| 0.996140561 | stable | TBC1D1    |
| 0.996176123 | stable | MRPL42P5  |
| 0.996291743 | stable | FLJ16686  |
| 0.996356615 | stable | C9ORF100  |
| 0.996356615 | stable | LOC642869 |
| 0.996356615 | stable | SHISA4    |

## DEG.infomation

|             |        |           |
|-------------|--------|-----------|
| 0.996356615 | stable | LOC652661 |
| 0.996356615 | stable | ZNF141    |
| 0.996356615 | stable | RNF152    |
| 0.996356615 | stable | SLC26A3   |
| 0.99638301  | stable | LOC652350 |
| 0.996423913 | stable | LOC55908  |
| 0.996440222 | stable | LOC651966 |
| 0.996440222 | stable | C4BPB     |
| 0.996573858 | stable | LOC653437 |
| 0.996573858 | stable | NEUROD1   |
| 0.996573858 | stable | KIAA0125  |
| 0.996664202 | stable | KCNMB3    |
| 0.996664202 | stable | LOC344967 |
| 0.996682129 | stable | LOC391609 |
| 0.996682129 | stable | DEFB114   |
| 0.996682129 | stable | PGM5P2    |
| 0.996682129 | stable | FLJ14082  |
| 0.996682129 | stable | LOC344165 |
| 0.996682129 | stable | LOC653547 |
| 0.996682129 | stable | C20ORF51  |
| 0.996682129 | stable | CLPS      |
| 0.996682129 | stable | LOC442710 |
| 0.996694734 | stable | FLJ16331  |
| 0.996749576 | stable | C3ORF47   |
| 0.996762366 | stable | LOC643824 |
| 0.996762366 | stable | QRICH2    |
| 0.996783185 | stable | ZMYND8    |
| 0.996783185 | stable | MUC20     |
| 0.996805209 | stable | TMED8     |
| 0.99687882  | stable | MDC1      |
| 0.99700313  | stable | OTUD1     |
| 0.997099809 | stable | ZIK1      |
| 0.997100686 | stable | LOC642744 |
| 0.997102698 | stable | TDGF3     |
| 0.997102698 | stable | MUC5B     |
| 0.997102698 | stable | FKSG44    |
| 0.997102698 | stable | FABP9     |
| 0.997102698 | stable | LMAN1L    |
| 0.997102698 | stable | ZBTB32    |
| 0.997102698 | stable | LOC645090 |
| 0.997102698 | stable | HCRT      |
| 0.997266024 | stable | AACSL     |
| 0.997266024 | stable | COPA      |
| 0.997266024 | stable | LOC391722 |
| 0.997266024 | stable | KCNJ4     |
| 0.997266024 | stable | MMP13     |
| 0.997266024 | stable | CCT8L2    |
| 0.997399767 | stable | MGC34829  |
| 0.997400639 | stable | TRIM49    |
| 0.997400639 | stable | DCPS      |
| 0.997449962 | stable | PLSCR4    |

## DEG.infomation

|             |        |           |
|-------------|--------|-----------|
| 0.997504465 | stable | NOL9      |
| 0.997597432 | stable | POF1B     |
| 0.997597432 | stable | LOC646603 |
| 0.997597432 | stable | VCX2      |
| 0.997597432 | stable | FBXL8     |
| 0.997597432 | stable | LOC644388 |
| 0.997645023 | stable | GDPD2     |
| 0.997857886 | stable | LOC643605 |
| 0.997857886 | stable | LOC401778 |
| 0.997857886 | stable | PWWP2     |
| 0.997857886 | stable | LOC641964 |
| 0.99794555  | stable | DNAH8     |
| 0.99794555  | stable | STIM1     |
| 0.99794555  | stable | C6ORF190  |
| 0.99794555  | stable | LOC652438 |
| 0.997960304 | stable | C20ORF75  |
| 0.997960304 | stable | ZBTB12    |
| 0.997960304 | stable | LOC642348 |
| 0.998192981 | stable | LOC643799 |
| 0.998262999 | stable | GLDC      |
| 0.998262999 | stable | SMUG1     |
| 0.998262999 | stable | LOC391352 |
| 0.998262999 | stable | MGC35030  |
| 0.998262999 | stable | OR10J1    |
| 0.998262999 | stable | LOC401703 |
| 0.998262999 | stable | LOC646082 |
| 0.998262999 | stable | CCDC83    |
| 0.998435408 | stable | LOC642233 |
| 0.998479442 | stable | MTL5      |
| 0.998492991 | stable | OR12D2    |
| 0.998769768 | stable | TPSG1     |
| 0.998776525 | stable | DAAM1     |
| 0.998776525 | stable | LOC643278 |
| 0.998811247 | stable | CDK3      |
| 0.998811247 | stable | RPE65     |
| 0.998811247 | stable | LOC648823 |
| 0.998833786 | stable | MMP3      |
| 0.998833786 | stable | FZD10     |
| 0.998940964 | stable | PLLP      |
| 0.998940964 | stable | KRTAP4-7  |
| 0.998971166 | stable | LOC645645 |
| 0.999059688 | stable | KCNK10    |
| 0.999090411 | stable | LOC651597 |
| 0.999090411 | stable | DLGAP4    |
| 0.999090411 | stable | LOC730760 |
| 0.999097545 | stable | LRRC66    |
| 0.999097545 | stable | LOC653264 |
| 0.99913587  | stable | RHOBTB3   |
| 0.999191441 | stable | LOC653421 |
| 0.999364462 | stable | LOC646135 |
| 0.999465802 | stable | ALOX12P2  |

DEG.infomation

|             |        |           |
|-------------|--------|-----------|
| 0.999650798 | stable | LOC647928 |
| 0.999716237 | stable | TEC       |
| 0.999745731 | stable | LOC440804 |
| 0.999794093 | stable | UBAP2     |
| 0.999843772 | stable | CASP5     |
| 0.999843772 | stable | ZZEF1     |
| 0.999926415 | stable | NPBWR2    |
| 0.999926415 | stable | KDELC1    |
