# Supplementary material for: The Establishment of Hypertrophic Cardiomyopathy Diagnosis Model via Artificial Neural Network and Random Decision Forest Method
Source: Hindawi journal article supplement (doi:10.1155/2022/2024974), 2022-09-15
Supplement: f2 [file 2024974.f2.pdf]

## TF-cytoscape

### Transcriptional regulatory network of the feature gene

| TF    | Target    | Mode of Regulation |
|-------|-----------|--------------------|
| ATF3  | DDIT3     | Activation         |
| ATF4  | DDIT3     | Activation         |
| ATF4  | DDIT3     | Unknown            |
| ATF6  | DDIT3     | Unknown            |
| BRCA1 | DDIT3     | Activation         |
| BRCA1 | JAK2      | Unknown            |
| CEBPA | S100A9    | Activation         |
| CEBPB | DDIT3     | Unknown            |
| CEBPB | S100A9    | Activation         |
| CEBPD | C3        | Unknown            |
| CEBPD | CASP8     | Unknown            |
| CEBPD | CCL20     | Activation         |
| CEBPD | CXCL1     | Activation         |
| CEBPD | CYP19A1   | Repression         |
| CEBPD | DDIT3     | Activation         |
| CEBPD | DDIT3     | Repression         |
| CEBPD | GADD45G   | Unknown            |
| CEBPD | GAPDH     | Unknown            |
| CEBPD | IL23A     | Activation         |
| CEBPD | PDGFRA    | Unknown            |
| CEBPD | POU5F1    | Activation         |
| CEBPD | PPARG     | Activation         |
| CEBPD | PRL       | Unknown            |
| CEBPD | PTGS2     | Unknown            |
| CEBPD | SOD1      | Activation         |
| CEBPD | TNF       | Unknown            |
| CEBPD | TNFAIP6   | Activation         |
| DDIT3 | ANKRD1    | Repression         |
| DDIT3 | ASNS      | Repression         |
| DDIT3 | ATF2      | Repression         |
| DDIT3 | ATF5      | Repression         |
| DDIT3 | ATG5      | Activation         |
| DDIT3 | CDK2      | Unknown            |
| DDIT3 | CEBPA     | Repression         |
| DDIT3 | CXCL8     | Unknown            |
| DDIT3 | IL6       | Activation         |
| DDIT3 | MAP1LC3B  | Activation         |
| DDIT3 | MCL1      | Unknown            |
| DDIT3 | NOS3      | Repression         |
| DDIT3 | RTN3      | Activation         |
| DDIT3 | SIRT1     | Repression         |
| DDIT3 | SIRT2     | Repression         |
| DDIT3 | TF        | Unknown            |
| DDIT3 | TNFRSF10B | Activation         |
| DDIT3 | TNFRSF10B | Repression         |
| DDIT3 | TNFRSF10B | Unknown            |
| DDIT3 | TRIB3     | Activation         |
| E2F1  | DDIT3     | Unknown            |
| ELK1  | ZFP36     | Unknown            |

## TF-cytoscape

|        |          |            |
|--------|----------|------------|
| ELK3   | MYH6     | Repression |
| ESR1   | JAK2     | Unknown    |
| FOS    | DDIT3    | Activation |
| FUS    | DDIT3    | Activation |
| GLI1   | S100A9   | Unknown    |
| JARID2 | MYH6     | Unknown    |
| JDP2   | DDIT3    | Repression |
| JUN    | DDIT3    | Activation |
| NFKB1  | SERPINA3 | Repression |
| NFYA   | DDIT3    | Unknown    |
| RB1    | DDIT3    | Unknown    |
| RELA   | SERPINA3 | Repression |
| SMAD3  | ZFP36    | Unknown    |
| SMAD4  | ZFP36    | Unknown    |
| STAT1  | JAK2     | Activation |
| STAT3  | DDIT3    | Repression |
| STAT3  | JAK2     | Activation |
| STAT3  | JAK2     | Unknown    |
| STAT3  | ZFP36    | Activation |
| TBX5   | MYH6     | Unknown    |
| XBP1   | DDIT3    | Unknown    |
| ZFP36  | CXCL8    | Repression |
| ZFP36  | ELAVL1   | Activation |
| ZFP36  | HIF1A    | Activation |
| ZFP36  | HIF1A    | Repression |
| ZFP36  | IL2      | Repression |
| ZFP36  | IL6      | Repression |
| ZFP36  | LATS2    | Repression |
| ZFP36  | SERPINB2 | Unknown    |
| ZFP36  | VEGFA    | Repression |
